# Supplementary material
Source: MDPI journal article supplement (https://www.mdpi.com/2304-6740/7/2/13)

# checkCIF/PLATON report

Structure factors have been supplied for datablock(s) LOL149AS

THIS REPORT IS FOR GUIDANCE ONLY. IF USED AS PART OF A REVIEW PROCEDURE FOR PUBLICATION, IT SHOULD NOT REPLACE THE EXPERTISE OF AN EXPERIENCED CRYSTALLOGRAPHIC REFEREE.

No syntax errors found.      CIF dictionary      Interpreting this report

## Datablock: LOL149AS

---

Bond precision:    C-C = 0.0151 Å

Wavelength=0.71073

Cell:                a=12.538(4)                b=12.721(4)                c=17.645(5)  
                      alpha=69.941(5)        beta=81.474(5)        gamma=89.259(5)  
Temperature:        100 K

|                        | Calculated                                              | Reported                       |
|------------------------|---------------------------------------------------------|--------------------------------|
| Volume                 | 2612.2(14)                                              | 2612.1(13)                     |
| Space group            | P -1                                                    | P -1                           |
| Hall group             | -P 1                                                    | -P 1                           |
| Moiety formula         | C23 H21 Au N4 O P S2, C23<br>H22 Au N4 O P S2, C H2 Cl2 | ?<br>?                         |
| Sum formula            | C47 H45 Au2 Cl2 N8 O2 P2<br>S4                          | C47 H45 Au2 Cl2 N8 O2 P2<br>S4 |
| Mr                     | 1408.93                                                 | 1408.92                        |
| Dx, g cm <sup>-3</sup> | 1.791                                                   | 1.791                          |
| Z                      | 2                                                       | 2                              |
| Mu (mm <sup>-1</sup> ) | 5.979                                                   | 5.979                          |
| F000                   | 1370.0                                                  | 1370.0                         |
| F000'                  | 1364.57                                                 |                                |
| h,k,lmax               | 15,15,21                                                | 15,15,21                       |
| Nref                   | 10265                                                   | 10187                          |
| Tmin,Tmax              | 0.427,0.787                                             | 0.328,0.591                    |
| Tmin'                  | 0.236                                                   |                                |

Correction method= # Reported T Limits: Tmin=0.328 Tmax=0.591  
AbsCorr = MULTI-SCAN

Data completeness= 0.992

Theta(max)= 26.000

R(reflections)= 0.0556( 7887)

wR2(reflections)= 0.1376( 10187)

S = 1.012

Npar= 600

---

The following ALERTS were generated. Each ALERT has the format

**test-name\_ALERT\_alert-type\_alert-level.**

Click on the hyperlinks for more details of the test.

### Alert level A

|                   |                          |       |          |           |
|-------------------|--------------------------|-------|----------|-----------|
| PLAT971_ALERT_2_A | Check Calcd Resid. Dens. | 0.98A | From Au1 | 4.18 eA-3 |
| PLAT971_ALERT_2_A | Check Calcd Resid. Dens. | 1.03A | From Au2 | 4.17 eA-3 |
| PLAT971_ALERT_2_A | Check Calcd Resid. Dens. | 1.10A | From Au1 | 3.89 eA-3 |
| PLAT971_ALERT_2_A | Check Calcd Resid. Dens. | 1.08A | From Au2 | 3.70 eA-3 |

### Alert level B

|                   |                                                |                          |
|-------------------|------------------------------------------------|--------------------------|
| PLAT201_ALERT_2_B | Isotropic non-H Atoms in Main Residue(s) ..... | 2 Report                 |
| PLAT971_ALERT_2_B | Check Calcd Resid. Dens.                       | 0.88A From Au1 3.28 eA-3 |
| PLAT971_ALERT_2_B | Check Calcd Resid. Dens.                       | 0.92A From Au2 3.24 eA-3 |
| PLAT971_ALERT_2_B | Check Calcd Resid. Dens.                       | 0.96A From Au2 3.03 eA-3 |
| PLAT971_ALERT_2_B | Check Calcd Resid. Dens.                       | 0.99A From Au2 3.01 eA-3 |
| PLAT971_ALERT_2_B | Check Calcd Resid. Dens.                       | 0.93A From Au1 2.86 eA-3 |

### Alert level C

|                   |                                                  |                            |
|-------------------|--------------------------------------------------|----------------------------|
| PLAT048_ALERT_1_C | MoietyFormula Not Given (or Incomplete) .....    | Please Check               |
| PLAT094_ALERT_2_C | Ratio of Maximum / Minimum Residual Density .... | 2.53 Report                |
| PLAT220_ALERT_2_C | Non-Solvent Resd 1 C Ueq(max)/Ueq(min) Range     | 3.2 Ratio                  |
| PLAT220_ALERT_2_C | Non-Solvent Resd 2 C Ueq(max)/Ueq(min) Range     | 3.2 Ratio                  |
| PLAT241_ALERT_2_C | High 'MainMol' Ueq as Compared to Neighbors of   | C34 Check                  |
| PLAT342_ALERT_3_C | Low Bond Precision on C-C Bonds .....            | 0.01508 Ang.               |
| PLAT761_ALERT_1_C | CIF Contains no X-H Bonds .....                  | Please Check               |
| PLAT762_ALERT_1_C | CIF Contains no X-Y-H or H-Y-H Angles .....      | Please Check               |
| PLAT906_ALERT_3_C | Large K Value in the Analysis of Variance .....  | 4.247 Check                |
| PLAT911_ALERT_3_C | Missing FCF Refl Between Thmin & STh/L= 0.600    | 42 Report                  |
| PLAT971_ALERT_2_C | Check Calcd Resid. Dens.                         | 0.90A From Au2 2.40 eA-3   |
| PLAT972_ALERT_2_C | Check Calcd Resid. Dens.                         | 0.94A From C55 -1.73 eA-3  |
| PLAT972_ALERT_2_C | Check Calcd Resid. Dens.                         | 1.26A From C100 -1.52 eA-3 |
| PLAT977_ALERT_2_C | Check Negative Difference Density on H3B         | -0.32 eA-3                 |
| PLAT977_ALERT_2_C | Check Negative Difference Density on H33         | -0.31 eA-3                 |
| PLAT978_ALERT_2_C | Number C-C Bonds with Positive Residual Density. | 0 Info                     |

### Alert level G

|                   |                                                  |              |
|-------------------|--------------------------------------------------|--------------|
| PLAT003_ALERT_2_G | Number of Uiso or Uij Restrained non-H Atoms ... | 4 Report     |
| PLAT007_ALERT_5_G | Number of Unrefined Donor-H Atoms .....          | 6 Report     |
| PLAT154_ALERT_1_G | The s.u.'s on the Cell Angles are Equal ..(Note) | 0.005 Degree |
| PLAT301_ALERT_3_G | Main Residue Disorder .....(Resd 1 )             | 6% Note      |
| PLAT773_ALERT_2_G | Check long C-C Bond in CIF: C31 --C32            | 1.76 Ang.    |
| PLAT910_ALERT_3_G | Missing # of FCF Reflection(s) Below Theta(Min). | 1 Note       |
| PLAT912_ALERT_4_G | Missing # of FCF Reflections Above STh/L= 0.600  | 34 Note      |
| PLAT933_ALERT_2_G | Number of OMIT Records in Embedded .res File ... | 1 Note       |

4 **ALERT level A** = Most likely a serious problem - resolve or explain

6 **ALERT level B** = A potentially serious problem, consider carefully

16 **ALERT level C** = Check. Ensure it is not caused by an omission or oversight

8 **ALERT level G** = General information/check it is not something unexpected

4 ALERT type 1 CIF construction/syntax error, inconsistent or missing data

23 ALERT type 2 Indicator that the structure model may be wrong or deficient

5 ALERT type 3 Indicator that the structure quality may be low

1 ALERT type 4 Improvement, methodology, query or suggestion

1 ALERT type 5 Informative message, check

---

## checkCIF publication errors

---

### Alert level A

PUBL004\_ALERT\_1\_A The contact author's name and address are missing,  
\_publ\_contact\_author\_name and \_publ\_contact\_author\_address.  
PUBL005\_ALERT\_1\_A \_publ\_contact\_author\_email, \_publ\_contact\_author\_fax and  
\_publ\_contact\_author\_phone are all missing.  
At least one of these should be present.  
PUBL006\_ALERT\_1\_A \_publ\_requested\_journal is missing  
e.g. 'Acta Crystallographica Section C'  
PUBL008\_ALERT\_1\_A \_publ\_section\_title is missing. Title of paper.  
PUBL009\_ALERT\_1\_A \_publ\_author\_name is missing. List of author(s) name(s).  
PUBL010\_ALERT\_1\_A \_publ\_author\_address is missing. Author(s) address(es).  
PUBL012\_ALERT\_1\_A \_publ\_section\_abstract is missing.  
Abstract of paper in English.

---

### Alert level G

PUBL017\_ALERT\_1\_G The \_publ\_section\_references section is missing or  
empty.

---

7 **ALERT level A** = Data missing that is essential or data in wrong format  
1 **ALERT level G** = General alerts. Data that may be required is missing

---

## Publication of your CIF

You should attempt to resolve as many as possible of the alerts in all categories. Often the minor alerts point to easily fixed oversights, errors and omissions in your CIF or refinement strategy, so attention to these fine details can be worthwhile. In order to resolve some of the more serious problems it may be necessary to carry out additional measurements or structure refinements. However, the nature of your study may justify the reported deviations from journal submission requirements and the more serious of these should be commented upon in the discussion or experimental section of a paper or in the "special\_details" fields of the CIF. *checkCIF* was carefully designed to identify outliers and unusual parameters, but every test has its limitations and alerts that are not important in a particular case may appear. Conversely, the absence of alerts does not guarantee there are no aspects of the results needing attention. It is up to the individual to critically assess their own results and, if necessary, seek expert advice.

If level A alerts remain, which you believe to be justified deviations, and you intend to submit this CIF for publication in a journal, you should additionally insert an explanation in your CIF using the Validation Reply Form (VRF) below. This will allow your explanation to be considered as part of the review process.

```
# start Validation Reply Form
_vrf_PUBL004_GLOBAL
;
PROBLEM: The contact author's name and address are missing,
RESPONSE: ...
;
_vrf_PUBL005_GLOBAL
;
```

```

PROBLEM: _publ_contact_author_email, _publ_contact_author_fax and
RESPONSE: ...
;
_vrf_PUBL006_GLOBAL
;
PROBLEM: _publ_requested_journal is missing
RESPONSE: ...
;
_vrf_PUBL008_GLOBAL
;
PROBLEM: _publ_section_title is missing. Title of paper.
RESPONSE: ...
;
_vrf_PUBL009_GLOBAL
;
PROBLEM: _publ_author_name is missing. List of author(s) name(s).
RESPONSE: ...
;
_vrf_PUBL010_GLOBAL
;
PROBLEM: _publ_author_address is missing. Author(s) address(es).
RESPONSE: ...
;
_vrf_PUBL012_GLOBAL
;
PROBLEM: _publ_section_abstract is missing.
RESPONSE: ...
;
_vrf_PLAT971_LOL149AS
;
PROBLEM: Check Calcd Resid. Dens.  0.98A    From Aul          4.18 eA-3
RESPONSE: ...
;
# end Validation Reply Form

```

If you wish to submit your CIF for publication in Acta Crystallographica Section C or E, you should upload your CIF via the web. If you wish to submit your CIF for publication in IUCrData you should upload your CIF via the web. If your CIF is to form part of a submission to another IUCr journal, you will be asked, either during electronic submission or by the Co-editor handling your paper, to upload your CIF via our web site.

---

**PLATON version of 19/10/2018; check.def file version of 15/10/2018**

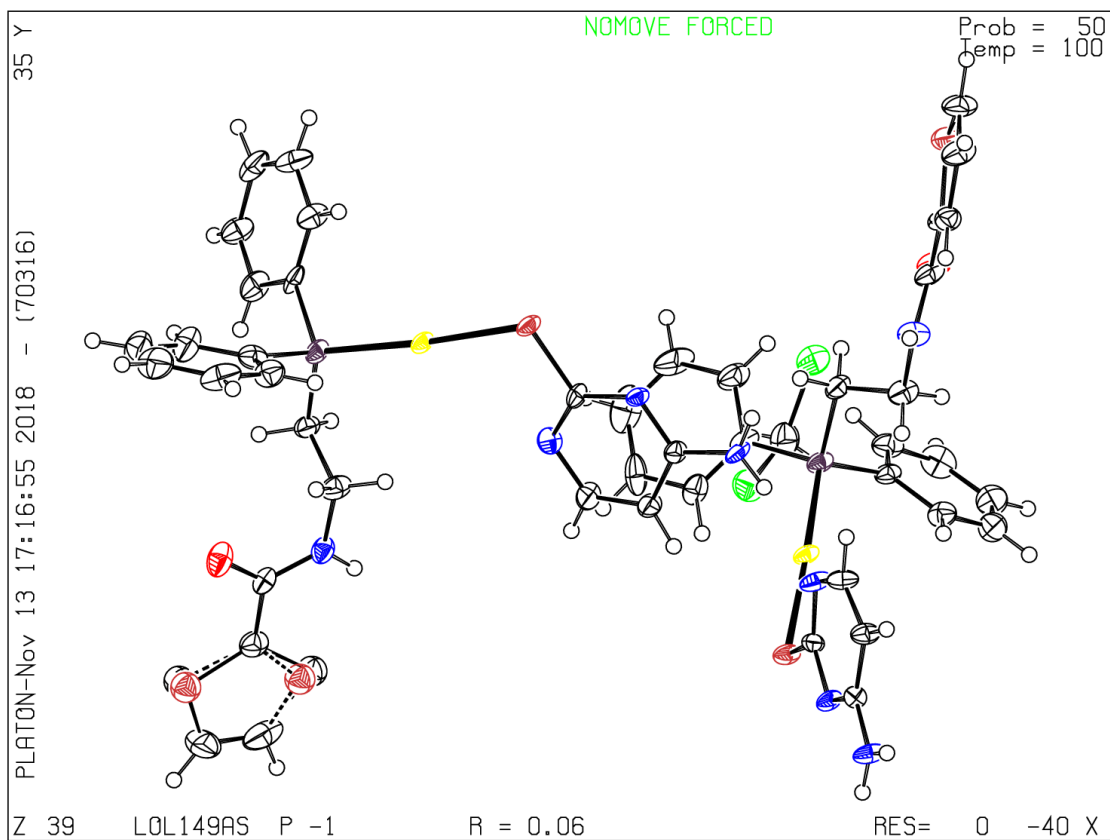

Supplement: s1 [file s1]
