# Supplementary material
Source: MDPI journal article supplement (https://www.mdpi.com/2304-6740/7/2/13)

# checkCIF/PLATON report

Structure factors have been supplied for datablock(s) c134s

THIS REPORT IS FOR GUIDANCE ONLY. IF USED AS PART OF A REVIEW PROCEDURE FOR PUBLICATION, IT SHOULD NOT REPLACE THE EXPERTISE OF AN EXPERIENCED CRYSTALLOGRAPHIC REFEREE.

No syntax errors found.      CIF dictionary      Interpreting this report

## Datablock: c134s

---

|                 |                                                |                                    |
|-----------------|------------------------------------------------|------------------------------------|
| Bond precision: | C-C = 0.0160 A                                 | Wavelength=0.71073                 |
| Cell:           | a=12.709(3)                                    | b=17.045(3)      c=24.688(5)       |
|                 | alpha=90                                       | beta=101.84(3)      gamma=90       |
| Temperature:    | 100 K                                          |                                    |
|                 | Calculated                                     | Reported                           |
| Volume          | 5234(2)                                        | 5234.6(19)                         |
| Space group     | P 21/n                                         | P 21/n                             |
| Hall group      | -P 2yn                                         | -P 2yn                             |
| Moiety formula  | 2(C25 H18 Au F5 N O P S),<br>C Cl2.50, 0.5(Cl) | ?                                  |
| Sum formula     | C51 H36 Au2 Cl3 F10 N2 O2<br>P2 S2             | C25.50 H18 Au Cl1.50 F5 N<br>O P S |
| Mr              | 1525.17                                        | 762.58                             |
| Dx, g cm-3      | 1.936                                          | 1.935                              |
| Z               | 4                                              | 8                                  |
| Mu (mm-1)       | 5.972                                          | 5.972                              |
| F000            | 2932.0                                         | 2932.0                             |
| F000'           | 2921.35                                        |                                    |
| h,k,lmax        | 15,20,29                                       | 15,20,29                           |
| Nref            | 9745                                           | 9695                               |
| Tmin,Tmax       | 0.493,0.620                                    | 0.507,1.000                        |
| Tmin'           | 0.122                                          |                                    |

Correction method= # Reported T Limits: Tmin=0.507 Tmax=1.000  
AbsCorr = MULTI-SCAN

Data completeness= 0.995      Theta(max)= 25.498

R(reflections)= 0.0690( 8537)      wR2(reflections)= 0.1220( 9695)

S = 1.315      Npar= 663

---

The following ALERTS were generated. Each ALERT has the format

**test-name\_ALERT\_alert-type\_alert-level.**

Click on the hyperlinks for more details of the test.

### Alert level B

PLAT910\_ALERT\_3\_B Missing # of FCF Reflection(s) Below Theta(Min).

32 Note

### Alert level C

|                   |                                                 |         |        |
|-------------------|-------------------------------------------------|---------|--------|
| PLAT202_ALERT_3_C | Isotropic non-H Atoms in Anion/Solvent .....    | 2       | Check  |
| PLAT220_ALERT_2_C | Non-Solvent Resd 1 C Ueq(max)/Ueq(min) Range    | 4.0     | Ratio  |
| PLAT220_ALERT_2_C | Non-Solvent Resd 2 C Ueq(max)/Ueq(min) Range    | 4.7     | Ratio  |
| PLAT222_ALERT_3_C | Non-Solv. Resd 2 H Uiso(max)/Uiso(min) Range    | 4.5     | Ratio  |
| PLAT234_ALERT_4_C | Large Hirshfeld Difference C71 --C72 .          | 0.18    | Ang.   |
| PLAT241_ALERT_2_C | High 'MainMol' Ueq as Compared to Neighbors of  | C31     | Check  |
| PLAT241_ALERT_2_C | High 'MainMol' Ueq as Compared to Neighbors of  | C32     | Check  |
| PLAT242_ALERT_2_C | Low 'MainMol' Ueq as Compared to Neighbors of   | C30     | Check  |
| PLAT242_ALERT_2_C | Low 'MainMol' Ueq as Compared to Neighbors of   | C71     | Check  |
| PLAT244_ALERT_4_C | Low 'Solvent' Ueq as Compared to Neighbors of   | C100    | Check  |
| PLAT342_ALERT_3_C | Low Bond Precision on C-C Bonds .....           | 0.01602 | Ang.   |
| PLAT906_ALERT_3_C | Large K Value in the Analysis of Variance ..... | 12.824  | Check  |
| PLAT906_ALERT_3_C | Large K Value in the Analysis of Variance ..... | 2.605   | Check  |
| PLAT911_ALERT_3_C | Missing FCF Refl Between Thmin & STh/L= 0.600   | 18      | Report |
| PLAT971_ALERT_2_C | Check Calcd Resid. Dens. 0.51A From Cl6         | 2.21    | eA-3   |
| PLAT971_ALERT_2_C | Check Calcd Resid. Dens. 0.84A From Cl4         | 2.02    | eA-3   |
| PLAT971_ALERT_2_C | Check Calcd Resid. Dens. 0.83A From Cl5         | 1.85    | eA-3   |
| PLAT971_ALERT_2_C | Check Calcd Resid. Dens. 0.87A From Cl6         | 1.80    | eA-3   |
| PLAT971_ALERT_2_C | Check Calcd Resid. Dens. 0.53A From C71         | 1.70    | eA-3   |
| PLAT971_ALERT_2_C | Check Calcd Resid. Dens. 0.91A From Aul         | 1.59    | eA-3   |
| PLAT972_ALERT_2_C | Check Calcd Resid. Dens. 0.65A From Cl4         | -1.94   | eA-3   |
| PLAT972_ALERT_2_C | Check Calcd Resid. Dens. 1.79A From C30         | -1.64   | eA-3   |
| PLAT972_ALERT_2_C | Check Calcd Resid. Dens. 0.68A From Cl4         | -1.62   | eA-3   |
| PLAT972_ALERT_2_C | Check Calcd Resid. Dens. 1.17A From C71         | -1.59   | eA-3   |

### Alert level G

|                   |                                                  |       |        |
|-------------------|--------------------------------------------------|-------|--------|
| PLAT002_ALERT_2_G | Number of Distance or Angle Restraints on AtSite | 4     | Note   |
| PLAT003_ALERT_2_G | Number of Uiso or Uij Restrained non-H Atoms ... | 1     | Report |
| PLAT007_ALERT_5_G | Number of Unrefined Donor-H Atoms .....          | 1     | Report |
| PLAT045_ALERT_1_G | Calculated and Reported Z Differ by a Factor ... | 0.50  | Check  |
| PLAT083_ALERT_2_G | SHELXL Second Parameter in WGHT Unusually Large  | 83.53 | Why ?  |
| PLAT176_ALERT_4_G | The CIF-Embedded .res File Contains SADI Records | 1     | Report |
| PLAT186_ALERT_4_G | The CIF-Embedded .res File Contains ISOR Records | 3     | Report |
| PLAT300_ALERT_4_G | Atom Site Occupancy of Cl2 Constrained at        | 0.5   | Check  |
| PLAT300_ALERT_4_G | Atom Site Occupancy of Cl3 Constrained at        | 0.5   | Check  |
| PLAT300_ALERT_4_G | Atom Site Occupancy of Cl4 Constrained at        | 0.7   | Check  |
| PLAT300_ALERT_4_G | Atom Site Occupancy of Cl6 Constrained at        | 0.5   | Check  |
| PLAT300_ALERT_4_G | Atom Site Occupancy of Cl1 Constrained at        | 0.3   | Check  |
| PLAT300_ALERT_4_G | Atom Site Occupancy of Cl5 Constrained at        | 0.5   | Check  |
| PLAT302_ALERT_4_G | Anion/Solvent/Minor-Residue Disorder (Resd 3 )   | 71%   | Note   |
| PLAT302_ALERT_4_G | Anion/Solvent/Minor-Residue Disorder (Resd 4 )   | 100%  | Note   |
| PLAT304_ALERT_4_G | Non-Integer Number of Atoms in ..... Resd 3      | 3.50  | Check  |
| PLAT304_ALERT_4_G | Non-Integer Number of Atoms in ..... Resd 4      | 0.50  | Check  |
| PLAT432_ALERT_2_G | Short Inter X...Y Contact Cl5 ..C100             | 2.11  | Ang.   |
|                   | x,y,z =                                          | 1_555 | Check  |
| PLAT432_ALERT_2_G | Short Inter X...Y Contact Cl1 ..C100             | 2.82  | Ang.   |
|                   | 2-x,1-y,1-z =                                    | 3_766 | Check  |
| PLAT434_ALERT_2_G | Short Inter HL..HL Contact F3 ..F8               | 2.71  | Ang.   |
|                   | 1-x,-y,1-z =                                     | 3_656 | Check  |
| PLAT779_ALERT_4_G | Suspect or Irrelevant (Bond) Angle in CIF .... # | 112   | Check  |

|                   |                                                  |      |       |       |       |            |
|-------------------|--------------------------------------------------|------|-------|-------|-------|------------|
| CL6               | -C100                                            | -CL2 | 1.555 | 1.555 | 1.555 | 43.10 Deg. |
| PLAT860_ALERT_3_G | Number of Least-Squares Restraints .....         |      |       |       |       | 9 Note     |
| PLAT933_ALERT_2_G | Number of OMIT Records in Embedded .res File ... |      |       |       |       | 12 Note    |
| PLAT978_ALERT_2_G | Number C-C Bonds with Positive Residual Density. |      |       |       |       | 1 Info     |

---

0 **ALERT level A** = Most likely a serious problem - resolve or explain  
1 **ALERT level B** = A potentially serious problem, consider carefully  
24 **ALERT level C** = Check. Ensure it is not caused by an omission or oversight  
24 **ALERT level G** = General information/check it is not something unexpected

1 ALERT type 1 CIF construction/syntax error, inconsistent or missing data  
24 ALERT type 2 Indicator that the structure model may be wrong or deficient  
8 ALERT type 3 Indicator that the structure quality may be low  
15 ALERT type 4 Improvement, methodology, query or suggestion  
1 ALERT type 5 Informative message, check

---

It is advisable to attempt to resolve as many as possible of the alerts in all categories. Often the minor alerts point to easily fixed oversights, errors and omissions in your CIF or refinement strategy, so attention to these fine details can be worthwhile. In order to resolve some of the more serious problems it may be necessary to carry out additional measurements or structure refinements. However, the purpose of your study may justify the reported deviations and the more serious of these should normally be commented upon in the discussion or experimental section of a paper or in the "special\_details" fields of the CIF. checkCIF was carefully designed to identify outliers and unusual parameters, but every test has its limitations and alerts that are not important in a particular case may appear. Conversely, the absence of alerts does not guarantee there are no aspects of the results needing attention. It is up to the individual to critically assess their own results and, if necessary, seek expert advice.

### Publication of your CIF in IUCr journals

A basic structural check has been run on your CIF. These basic checks will be run on all CIFs submitted for publication in IUCr journals (*Acta Crystallographica*, *Journal of Applied Crystallography*, *Journal of Synchrotron Radiation*); however, if you intend to submit to *Acta Crystallographica Section C* or *E* or *IUCrData*, you should make sure that full publication checks are run on the final version of your CIF prior to submission.

### Publication of your CIF in other journals

Please refer to the *Notes for Authors* of the relevant journal for any special instructions relating to CIF submission.

---

**PLATON version of 19/10/2018; check.def file version of 15/10/2018**

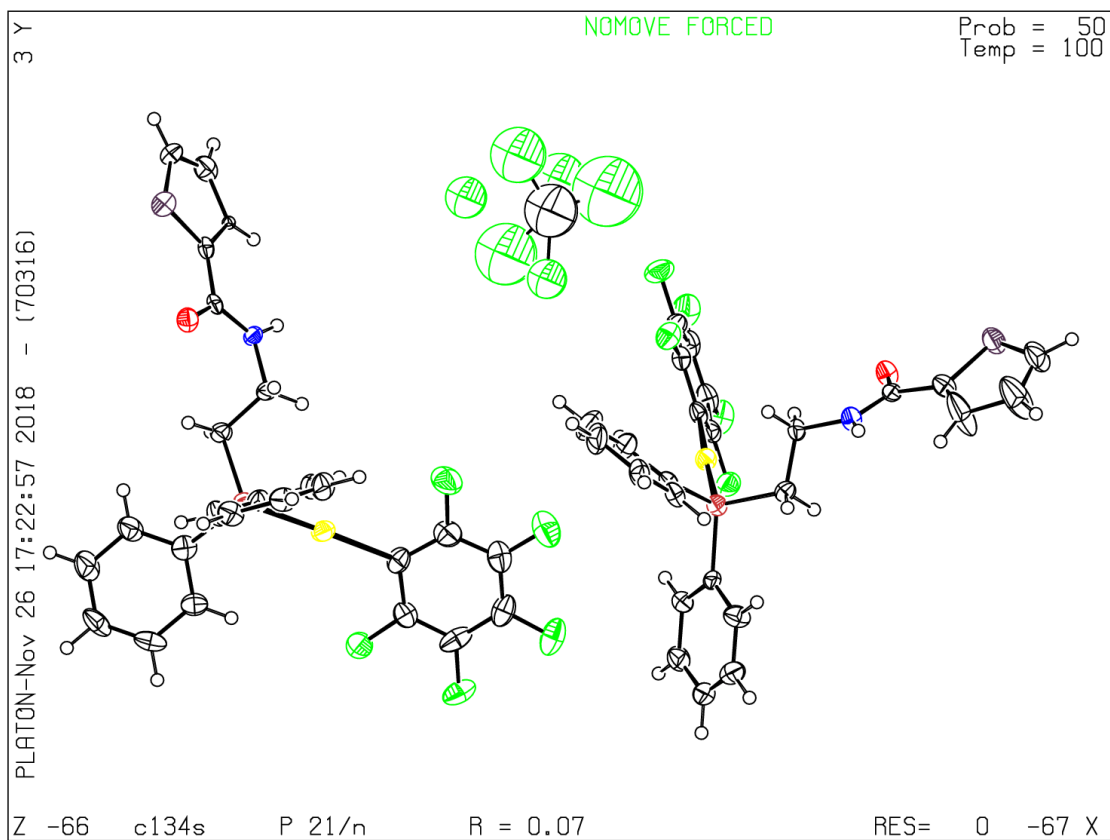

Supplement: s1 [file s1]
