# Supplementary material
Source: MDPI journal article supplement (https://www.mdpi.com/2304-6740/7/2/13)
Supplement: s1 [file s1]

Archive with 7 entries (6 files):
- cif/
- cif/checkcif-complex6.pdf
- cif/checkcif-complex7.pdf
- cif/checkcifcomplex3.pdf
- cif/complex3.cif
- cif/complex6.cif
- cif/complex7.cif
