# Supplementary material
Source: MDPI journal article supplement (https://www.mdpi.com/2304-6740/7/2/13)
Supplement: s1 [file s1 › cif/complex3.cif]

data_c134s
 
_audit_creation_method            'SHELXL-2014/7'
_shelx_SHELXL_version_number      '2014/7'
_chemical_name_systematic         ?
_chemical_name_common             ?
_chemical_melting_point           ?
_chemical_formula_moiety          ?
_chemical_formula_sum
 'C25.50 H18 Au Cl1.50 F5 N O P S' 
_chemical_formula_weight          762.58

loop_
 _atom_type_symbol
 _atom_type_description
 _atom_type_scat_dispersion_real
 _atom_type_scat_dispersion_imag
 _atom_type_scat_source
 'C'  'C'   0.0033   0.0016
 'International Tables Vol C Tables 4.2.6.8 and 6.1.1.4'
 'H'  'H'   0.0000   0.0000
 'International Tables Vol C Tables 4.2.6.8 and 6.1.1.4'
 'N'  'N'   0.0061   0.0033
 'International Tables Vol C Tables 4.2.6.8 and 6.1.1.4'
 'O'  'O'   0.0106   0.0060
 'International Tables Vol C Tables 4.2.6.8 and 6.1.1.4'
 'F'  'F'   0.0171   0.0103
 'International Tables Vol C Tables 4.2.6.8 and 6.1.1.4'
 'P'  'P'   0.1023   0.0942
 'International Tables Vol C Tables 4.2.6.8 and 6.1.1.4'
 'S'  'S'   0.1246   0.1234
 'International Tables Vol C Tables 4.2.6.8 and 6.1.1.4'
 'Au'  'Au'  -2.0133   8.8022
 'International Tables Vol C Tables 4.2.6.8 and 6.1.1.4'
 'Cl'  'Cl'   0.1484   0.1585
 'International Tables Vol C Tables 4.2.6.8 and 6.1.1.4'
 
_space_group_crystal_system       monoclinic
_space_group_IT_number            14
_space_group_name_H-M_alt         'P 21/n'
_space_group_name_Hall            '-P 2yn'
 
_shelx_space_group_comment
;
The symmetry employed for this shelxl refinement is uniquely defined
by the following loop, which should always be used as a source of
symmetry information in preference to the above space-group names.
They are only intended as comments.
;
 
loop_
 _space_group_symop_operation_xyz
 'x, y, z'
 '-x+1/2, y+1/2, -z+1/2'
 '-x, -y, -z'
 'x-1/2, -y-1/2, z-1/2'
 
_cell_length_a                    12.709(3)
_cell_length_b                    17.045(3)
_cell_length_c                    24.688(5)
_cell_angle_alpha                 90
_cell_angle_beta                  101.84(3)
_cell_angle_gamma                 90
_cell_volume                      5234.6(19)
_cell_formula_units_Z             8
_cell_measurement_temperature     100(2)
_cell_measurement_reflns_used   30457
_cell_measurement_theta_min     3.6110
_cell_measurement_theta_max     35.1441
 
_exptl_crystal_description        prism
_exptl_crystal_colour             colourless
_exptl_crystal_density_meas       ?
_exptl_crystal_density_method     ?
_exptl_crystal_density_diffrn     1.935          
_exptl_crystal_F_000              2932
_exptl_transmission_factor_min    ?
_exptl_transmission_factor_max    ?
_exptl_crystal_size_max           0.350
_exptl_crystal_size_mid           0.100
_exptl_crystal_size_min           0.080
_exptl_absorpt_coefficient_mu     5.972
_shelx_estimated_absorpt_T_min    0.229
_shelx_estimated_absorpt_T_max    0.647
_exptl_absorpt_correction_type    multi-scan
_exptl_absorpt_correction_T_min   0.50685
_exptl_absorpt_correction_T_max   1.00000
_exptl_absorpt_process_details
;
CrysAlis RED, Oxford Diffraction Ltd.,
Version 1.171.31.7 (release 18-10-2006 CrysAlis171 .NET)
(compiled Oct 18 2006,16:28:17)
Empirical absorption correction using spherical harmonics,
 implemented in SCALE3 ABSPACK scaling algorithm.
;
_exptl_absorpt_special_details    ?
_diffrn_ambient_temperature       100(2)
_diffrn_radiation_wavelength      0.71073
_diffrn_radiation_type            MoK\a
_diffrn_source                    'fine-focus sealed tube'
_diffrn_measurement_device_type   'Xcalibur Oxford Diffraction'
_diffrn_measurement_method        '\w rotations'
_diffrn_detector_area_resol_mean  16.06
_diffrn_reflns_number             69630
_diffrn_reflns_av_unetI/netI      0.0352
_diffrn_reflns_av_R_equivalents   0.0580
_diffrn_reflns_limit_h_min        -15
_diffrn_reflns_limit_h_max        15
_diffrn_reflns_limit_k_min        -20
_diffrn_reflns_limit_k_max        20
_diffrn_reflns_limit_l_min        -29
_diffrn_reflns_limit_l_max        29
_diffrn_reflns_theta_min          3.636
_diffrn_reflns_theta_max          25.498
_diffrn_reflns_theta_full         25.242
_diffrn_measured_fraction_theta_max   0.995
_diffrn_measured_fraction_theta_full  0.995
_diffrn_reflns_Laue_measured_fraction_max    0.995
_diffrn_reflns_Laue_measured_fraction_full   0.995
_diffrn_reflns_point_group_measured_fraction_max   0.995
_diffrn_reflns_point_group_measured_fraction_full  0.995
_reflns_number_total              9695
_reflns_number_gt                 8537
_reflns_threshold_expression      'I > 2\s(I)'
_reflns_Friedel_coverage          0.000
_reflns_Friedel_fraction_max      .
_reflns_Friedel_fraction_full     .
 
_reflns_special_details
;
 Reflections were merged by SHELXL according to the crystal
 class for the calculation of statistics and refinement.
 
 _reflns_Friedel_fraction is defined as the number of unique
 Friedel pairs measured divided by the number that would be
 possible theoretically, ignoring centric projections and
 systematic absences.
;
 
_computing_data_collection        'Crysalis CCD' 
_computing_cell_refinement        'Crysalis RED' 
_computing_data_reduction         'Crysalis RED' 
_computing_structure_solution     'SHELXS-97 (Sheldrick, 1990)'
_computing_structure_refinement 'SHELXL-2014/7 (Sheldrick, 2014)'
_computing_molecular_graphics     XP
_computing_publication_material   XCIF
_refine_special_details           ?
_refine_ls_structure_factor_coef  Fsqd
_refine_ls_matrix_type            full
_refine_ls_weighting_scheme       calc
_refine_ls_weighting_details
'w=1/[\s^2^(Fo^2^)+83.5299P] where P=(Fo^2^+2Fc^2^)/3'
_atom_sites_solution_primary      ?
_atom_sites_solution_secondary    ?
_atom_sites_solution_hydrogens    mixed
_refine_ls_hydrogen_treatment     mixed
_refine_ls_extinction_method      none
_refine_ls_extinction_coef        .
_refine_ls_number_reflns          9695
_refine_ls_number_parameters      663
_refine_ls_number_restraints      9
_refine_ls_R_factor_all           0.0810
_refine_ls_R_factor_gt            0.0690
_refine_ls_wR_factor_ref          0.1220
_refine_ls_wR_factor_gt           0.1177
_refine_ls_goodness_of_fit_ref    1.315
_refine_ls_restrained_S_all       1.315
_refine_ls_shift/su_max           0.003
_refine_ls_shift/su_mean          0.000
 
loop_
 _atom_site_label
 _atom_site_type_symbol
 _atom_site_fract_x
 _atom_site_fract_y
 _atom_site_fract_z
 _atom_site_U_iso_or_equiv
 _atom_site_adp_type
 _atom_site_occupancy
 _atom_site_site_symmetry_order  
 _atom_site_calc_flag
 _atom_site_refinement_flags_posn
 _atom_site_refinement_flags_adp
 _atom_site_refinement_flags_occupancy
 _atom_site_disorder_assembly
 _atom_site_disorder_group
Au1 Au 0.57291(3) 0.14625(2) 0.61630(2) 0.02701(11) Uani 1 1 d . . . . .
C1 C 0.6191(8) 0.0662(6) 0.5644(4) 0.027(2) Uani 1 1 d . . . . .
C2 C 0.5914(8) -0.0128(6) 0.5611(4) 0.029(2) Uani 1 1 d . . . . .
C3 C 0.6269(9) -0.0656(6) 0.5268(4) 0.035(3) Uani 1 1 d . . . . .
C4 C 0.6937(9) -0.0404(7) 0.4932(4) 0.034(3) Uani 1 1 d . . . . .
C5 C 0.7238(8) 0.0372(7) 0.4946(4) 0.032(2) Uani 1 1 d . . . . .
C6 C 0.6874(8) 0.0881(6) 0.5298(4) 0.027(2) Uani 1 1 d . . . . .
F1 F 0.5251(5) -0.0408(4) 0.5931(2) 0.0377(15) Uani 1 1 d . . . . .
F2 F 0.5986(6) -0.1410(4) 0.5255(3) 0.0482(17) Uani 1 1 d . . . . .
F3 F 0.7308(6) -0.0899(4) 0.4595(3) 0.0535(19) Uani 1 1 d . . . . .
F4 F 0.7900(6) 0.0627(4) 0.4617(3) 0.0484(18) Uani 1 1 d . . . . .
F5 F 0.7209(5) 0.1636(3) 0.5298(2) 0.0371(15) Uani 1 1 d . . . . .
P1 P 0.5335(2) 0.23913(15) 0.67533(10) 0.0252(6) Uani 1 1 d . . . . .
C11 C 0.4094(8) 0.2228(6) 0.6988(4) 0.023(2) Uani 1 1 d . . . . .
C12 C 0.3891(9) 0.2525(7) 0.7483(4) 0.035(3) Uani 1 1 d . . . . .
H12 H 0.4414 0.2842 0.7714 0.042 Uiso 1 1 calc R U . . .
C13 C 0.2934(9) 0.2359(7) 0.7639(5) 0.038(3) Uani 1 1 d . . . . .
H13 H 0.2799 0.2562 0.7977 0.045 Uiso 1 1 calc R U . . .
C14 C 0.2179(9) 0.1901(7) 0.7310(5) 0.038(3) Uani 1 1 d . . . . .
H14 H 0.1525 0.1784 0.7422 0.045 Uiso 1 1 calc R U . . .
C15 C 0.2359(9) 0.1610(7) 0.6816(5) 0.039(3) Uani 1 1 d . . . . .
H15 H 0.1828 0.1297 0.6588 0.047 Uiso 1 1 calc R U . . .
C16 C 0.3313(8) 0.1774(7) 0.6655(4) 0.035(3) Uani 1 1 d . . . . .
H16 H 0.3435 0.1575 0.6314 0.042 Uiso 1 1 calc R U . . .
C21 C 0.5319(7) 0.3377(6) 0.6464(4) 0.027(2) Uani 1 1 d . . . . .
C22 C 0.5317(8) 0.4045(6) 0.6790(4) 0.031(2) Uani 1 1 d . . . . .
H22 H 0.5284 0.3991 0.7169 0.037 Uiso 1 1 calc R U . . .
C23 C 0.5363(9) 0.4786(7) 0.6567(5) 0.038(3) Uani 1 1 d . . . . .
H23 H 0.5371 0.5240 0.6792 0.045 Uiso 1 1 calc R U . . .
C24 C 0.5397(10) 0.4857(8) 0.6014(5) 0.048(3) Uani 1 1 d . . . . .
H24 H 0.5430 0.5364 0.5859 0.058 Uiso 1 1 calc R U . . .
C25 C 0.5384(11) 0.4217(8) 0.5688(5) 0.054(4) Uani 1 1 d . . . . .
H25 H 0.5398 0.4280 0.5307 0.065 Uiso 1 1 calc R U . . .
C26 C 0.5349(9) 0.3468(7) 0.5908(4) 0.040(3) Uani 1 1 d . . . . .
H26 H 0.5345 0.3020 0.5679 0.048 Uiso 1 1 calc R U . . .
C27 C 0.6379(8) 0.2429(6) 0.7382(4) 0.026(2) Uani 1 1 d . . . . .
H27A H 0.6244 0.2881 0.7611 0.031 Uiso 1 1 calc R U . . .
H27B H 0.6353 0.1945 0.7600 0.031 Uiso 1 1 calc R U . . .
C28 C 0.7483(8) 0.2510(6) 0.7247(4) 0.026(2) Uani 1 1 d . . . . .
H28A H 0.7616 0.2061 0.7017 0.031 Uiso 1 1 calc R U . . .
H28B H 0.7511 0.2997 0.7031 0.031 Uiso 1 1 calc R U . . .
N1 N 0.8317(7) 0.2536(5) 0.7750(3) 0.0269(19) Uani 1 1 d . . . . .
H1 H 0.8293 0.2920 0.7985 0.032 Uiso 1 1 calc R U . . .
C29 C 0.9111(7) 0.2020(6) 0.7877(4) 0.022(2) Uani 1 1 d . . . . .
O1 O 0.9233(5) 0.1456(4) 0.7576(3) 0.0295(15) Uani 1 1 d . . . . .
C30 C 0.9871(8) 0.2161(6) 0.8409(4) 0.029(2) Uani 1 1 d . . . . .
C31 C 0.9737(12) 0.2603(11) 0.8840(6) 0.081(6) Uani 1 1 d . . . . .
H31 H 0.9115 0.2910 0.8843 0.097 Uiso 1 1 calc R U . . .
C32 C 1.0639(12) 0.2558(11) 0.9297(6) 0.087(6) Uani 1 1 d . . . . .
H32 H 1.0676 0.2822 0.9639 0.105 Uiso 1 1 calc R U . . .
C33 C 1.1427(10) 0.2097(8) 0.9181(5) 0.051(3) Uani 1 1 d . . . . .
H33 H 1.2103 0.2022 0.9425 0.061 Uiso 1 1 calc R U . . .
S1 S 1.1071(2) 0.16715(19) 0.85556(12) 0.0399(7) Uani 1 1 d . . . . .
Au2 Au 0.05018(3) 0.39827(3) 0.34481(2) 0.03202(12) Uani 1 1 d . . . . .
C41 C 0.0806(9) 0.3195(6) 0.4087(4) 0.035(3) Uani 1 1 d . . . . .
C42 C -0.0023(9) 0.2820(6) 0.4281(5) 0.035(3) Uani 1 1 d . . . . .
C43 C 0.0125(11) 0.2415(7) 0.4768(5) 0.042(3) Uani 1 1 d . . . . .
C44 C 0.1135(11) 0.2371(7) 0.5098(5) 0.042(3) Uani 1 1 d . . . . .
C45 C 0.1981(10) 0.2718(7) 0.4926(5) 0.045(3) Uani 1 1 d . . . . .
C46 C 0.1792(10) 0.3109(7) 0.4430(5) 0.043(3) Uani 1 1 d . . . . .
F6 F -0.1042(5) 0.2859(4) 0.3972(3) 0.0489(18) Uani 1 1 d . . . . .
F7 F -0.0717(6) 0.2065(4) 0.4927(3) 0.0515(18) Uani 1 1 d . . . . .
F8 F 0.1253(7) 0.1993(4) 0.5588(3) 0.054(2) Uani 1 1 d . . . . .
F9 F 0.2966(6) 0.2676(5) 0.5255(3) 0.062(2) Uani 1 1 d . . . . .
F10 F 0.2663(6) 0.3444(5) 0.4285(3) 0.062(2) Uani 1 1 d . . . . .
P2 P 0.0189(2) 0.50103(16) 0.28497(11) 0.0265(6) Uani 1 1 d . . . . .
C51 C 0.0563(8) 0.5912(6) 0.3249(4) 0.029(2) Uani 1 1 d . . . . .
C52 C 0.1415(9) 0.5882(7) 0.3707(4) 0.034(3) Uani 1 1 d . . . . .
H52 H 0.1802 0.5407 0.3800 0.041 Uiso 1 1 calc R U . . .
C53 C 0.1690(9) 0.6549(7) 0.4023(4) 0.038(3) Uani 1 1 d . . . . .
H53 H 0.2269 0.6528 0.4335 0.046 Uiso 1 1 calc R U . . .
C54 C 0.1144(9) 0.7238(7) 0.3896(4) 0.036(3) Uani 1 1 d . . . . .
H54 H 0.1345 0.7692 0.4115 0.043 Uiso 1 1 calc R U . . .
C55 C 0.0298(9) 0.7266(7) 0.3446(5) 0.037(3) Uani 1 1 d . . . . .
H55 H -0.0094 0.7740 0.3361 0.044 Uiso 1 1 calc R U . . .
C56 C 0.0013(8) 0.6603(6) 0.3115(4) 0.032(2) Uani 1 1 d . . . . .
H56 H -0.0557 0.6629 0.2800 0.038 Uiso 1 1 calc R U . . .
C61 C -0.1199(9) 0.5165(6) 0.2502(4) 0.031(2) Uani 1 1 d . . . . .
C62 C -0.1492(9) 0.5498(7) 0.1987(4) 0.040(3) Uani 1 1 d . . . . .
H62 H -0.0957 0.5629 0.1784 0.048 Uiso 1 1 calc R U . . .
C63 C -0.2559(10) 0.5643(8) 0.1763(5) 0.049(3) Uani 1 1 d . . . . .
H63 H -0.2756 0.5867 0.1404 0.059 Uiso 1 1 calc R U . . .
C64 C -0.3344(9) 0.5465(8) 0.2057(5) 0.046(3) Uani 1 1 d . . . . .
H64 H -0.4078 0.5572 0.1904 0.056 Uiso 1 1 calc R U . . .
C65 C -0.3055(9) 0.5134(7) 0.2568(5) 0.041(3) Uani 1 1 d . . . . .
H65 H -0.3592 0.5011 0.2772 0.049 Uiso 1 1 calc R U . . .
C66 C -0.1989(9) 0.4975(6) 0.2795(5) 0.034(2) Uani 1 1 d . . . . .
H66 H -0.1797 0.4735 0.3149 0.040 Uiso 1 1 calc R U . . .
C67 C 0.0987(8) 0.5004(6) 0.2312(4) 0.028(2) Uani 1 1 d . . . . .
H67A H 0.0780 0.4547 0.2066 0.034 Uiso 1 1 calc R U . . .
H67B H 0.0837 0.5486 0.2086 0.034 Uiso 1 1 calc R U . . .
C68 C 0.2181(8) 0.4960(6) 0.2569(4) 0.026(2) Uani 1 1 d . . . . .
H68A H 0.2406 0.5453 0.2772 0.031 Uiso 1 1 calc R U . . .
H68B H 0.2310 0.4523 0.2838 0.031 Uiso 1 1 calc R U . . .
N2 N 0.2831(7) 0.4841(5) 0.2151(3) 0.0230(18) Uani 1 1 d . . . . .
H2 H 0.320(8) 0.444(6) 0.222(4) 0.02(3) Uiso 1 1 d . . . . .
C69 C 0.2974(7) 0.5420(6) 0.1809(4) 0.023(2) Uani 1 1 d . . . . .
O2 O 0.2526(6) 0.6069(4) 0.1802(3) 0.0319(16) Uani 1 1 d . . . . .
C70 C 0.3695(7) 0.5244(6) 0.1419(4) 0.023(2) Uani 1 1 d . . . . .
C71 C 0.4211(6) 0.4491(5) 0.1305(3) 0.0105(15) Uani 1 1 d . U . . .
H71 H 0.4156 0.3997 0.1475 0.013 Uiso 1 1 calc R U . . .
C72 C 0.4798(9) 0.4665(7) 0.0891(4) 0.036(3) Uani 1 1 d . . . . .
H72 H 0.5192 0.4276 0.0743 0.044 Uiso 1 1 calc R U . . .
C73 C 0.4762(9) 0.5427(7) 0.0718(4) 0.036(3) Uani 1 1 d . . . . .
H73 H 0.5129 0.5612 0.0445 0.043 Uiso 1 1 calc R U . . .
S2 S 0.4010(2) 0.6005(2) 0.10358(12) 0.0425(7) Uani 1 1 d . . . . .
C100 C 0.845(2) 0.5340(19) 0.4700(13) 0.170(12) Uiso 1 1 d D . . . .
Cl1 Cl 0.929(4) 0.463(3) 0.496(2) 0.30(2) Uiso 0.3 1 d D . P . .
Cl2 Cl 0.7318(9) 0.5176(6) 0.4912(5) 0.093(3) Uiso 0.5 1 d D . P . .
Cl3 Cl 0.9010(16) 0.5838(12) 0.4279(8) 0.186(7) Uiso 0.5 1 d D . P . .
Cl4 Cl 0.8883(10) 0.4527(7) 0.4404(6) 0.163(4) Uiso 0.7 1 d . . P . .
Cl5 Cl 0.7765(9) 0.6032(7) 0.4008(5) 0.103(3) Uiso 0.5 1 d . . P . .
Cl6 Cl 0.723(2) 0.5306(15) 0.4434(11) 0.230(10) Uiso 0.5 1 d . . P . .
 
loop_
 _atom_site_aniso_label
 _atom_site_aniso_U_11
 _atom_site_aniso_U_22
 _atom_site_aniso_U_33
 _atom_site_aniso_U_23
 _atom_site_aniso_U_13
 _atom_site_aniso_U_12
Au1 0.0274(2) 0.0299(2) 0.02304(19) -0.00323(17) 0.00359(15) 0.00083(18)
C1 0.021(5) 0.033(6) 0.022(5) -0.004(4) -0.005(4) 0.002(4)
C2 0.023(5) 0.037(6) 0.024(5) -0.003(4) -0.001(4) 0.003(5)
C3 0.036(6) 0.030(6) 0.032(6) -0.010(5) -0.007(5) 0.002(5)
C4 0.039(6) 0.036(6) 0.023(5) -0.008(5) -0.002(5) 0.007(5)
C5 0.028(6) 0.048(7) 0.019(5) -0.004(5) 0.005(4) 0.002(5)
C6 0.027(5) 0.028(6) 0.024(5) 0.001(4) -0.001(4) 0.001(4)
F1 0.037(4) 0.046(4) 0.030(3) 0.001(3) 0.006(3) -0.007(3)
F2 0.069(5) 0.033(4) 0.039(4) -0.006(3) 0.002(3) -0.001(4)
F3 0.075(5) 0.052(4) 0.035(4) -0.014(3) 0.013(3) 0.016(4)
F4 0.049(4) 0.069(5) 0.032(3) -0.004(3) 0.020(3) -0.005(4)
F5 0.045(4) 0.034(4) 0.031(3) -0.003(3) 0.004(3) -0.009(3)
P1 0.0240(13) 0.0260(13) 0.0252(13) -0.0016(11) 0.0039(10) 0.0010(11)
C11 0.024(5) 0.024(5) 0.022(5) 0.007(4) 0.007(4) 0.005(4)
C12 0.029(6) 0.039(6) 0.038(6) -0.009(5) 0.009(5) -0.004(5)
C13 0.039(7) 0.045(7) 0.033(6) 0.002(5) 0.013(5) -0.002(6)
C14 0.032(6) 0.045(7) 0.038(6) 0.014(5) 0.010(5) 0.005(5)
C15 0.028(6) 0.048(7) 0.038(6) 0.005(5) -0.002(5) -0.008(5)
C16 0.024(6) 0.051(7) 0.029(5) 0.004(5) 0.005(4) 0.003(5)
C21 0.015(5) 0.037(6) 0.027(5) 0.004(4) 0.000(4) -0.002(4)
C22 0.024(5) 0.034(6) 0.031(5) -0.003(5) -0.003(4) 0.005(5)
C23 0.035(6) 0.032(6) 0.042(7) 0.012(5) -0.004(5) 0.001(5)
C24 0.051(8) 0.046(8) 0.042(7) 0.020(6) -0.001(6) 0.005(6)
C25 0.068(9) 0.066(9) 0.031(6) 0.011(6) 0.014(6) -0.004(7)
C26 0.048(7) 0.042(7) 0.031(6) 0.007(5) 0.010(5) 0.001(6)
C27 0.029(5) 0.026(5) 0.023(5) -0.001(4) 0.007(4) 0.000(4)
C28 0.023(5) 0.032(6) 0.020(5) 0.001(4) 0.000(4) 0.002(4)
N1 0.030(5) 0.027(4) 0.022(4) -0.008(3) 0.002(3) 0.007(4)
C29 0.018(5) 0.026(5) 0.021(5) 0.000(4) 0.002(4) -0.007(4)
O1 0.030(4) 0.027(4) 0.029(4) -0.009(3) -0.001(3) 0.004(3)
C30 0.024(5) 0.027(5) 0.033(6) -0.009(4) 0.002(4) -0.003(4)
C31 0.056(9) 0.114(14) 0.057(9) -0.047(9) -0.027(7) 0.048(9)
C32 0.056(10) 0.129(16) 0.062(10) -0.055(10) -0.022(8) 0.034(10)
C33 0.031(7) 0.073(9) 0.043(7) -0.012(7) -0.009(5) 0.003(7)
S1 0.0310(15) 0.0523(19) 0.0339(14) -0.0060(13) 0.0006(12) 0.0089(13)
Au2 0.0324(2) 0.0332(2) 0.0328(2) 0.00440(18) 0.01232(17) -0.00021(19)
C41 0.044(7) 0.025(5) 0.036(6) 0.008(5) 0.009(5) 0.001(5)
C42 0.033(6) 0.032(6) 0.037(6) -0.004(5) 0.002(5) 0.000(5)
C43 0.064(8) 0.035(6) 0.034(6) -0.010(5) 0.025(6) -0.020(6)
C44 0.065(9) 0.028(6) 0.031(6) 0.001(5) 0.006(6) 0.001(6)
C45 0.046(8) 0.038(7) 0.046(7) 0.003(6) -0.003(6) 0.003(6)
C46 0.039(7) 0.031(6) 0.061(8) 0.011(6) 0.011(6) -0.005(5)
F6 0.039(4) 0.064(5) 0.042(4) 0.005(3) 0.004(3) -0.011(4)
F7 0.064(5) 0.051(4) 0.046(4) 0.001(3) 0.027(4) -0.018(4)
F8 0.089(6) 0.036(4) 0.036(4) 0.006(3) 0.007(4) 0.007(4)
F9 0.051(5) 0.054(5) 0.071(5) 0.004(4) -0.010(4) -0.001(4)
F10 0.039(4) 0.059(5) 0.088(6) 0.026(4) 0.012(4) -0.005(4)
P2 0.0251(14) 0.0303(14) 0.0245(13) -0.0026(11) 0.0063(10) -0.0020(12)
C51 0.031(6) 0.035(6) 0.020(5) -0.002(4) 0.005(4) -0.006(5)
C52 0.035(6) 0.041(7) 0.026(5) -0.001(5) 0.004(5) 0.007(5)
C53 0.041(7) 0.046(7) 0.024(5) -0.008(5) -0.002(5) -0.007(6)
C54 0.037(6) 0.039(6) 0.033(6) -0.014(5) 0.010(5) -0.007(5)
C55 0.034(6) 0.038(6) 0.039(6) -0.006(5) 0.007(5) -0.001(5)
C56 0.029(6) 0.031(6) 0.032(5) -0.003(5) -0.001(4) 0.001(5)
C61 0.036(6) 0.032(6) 0.026(5) -0.014(4) 0.004(4) -0.009(5)
C62 0.030(6) 0.059(8) 0.031(6) -0.013(6) 0.003(5) 0.001(6)
C63 0.040(7) 0.073(9) 0.029(6) -0.017(6) -0.005(5) 0.007(7)
C64 0.023(6) 0.065(9) 0.046(7) -0.023(6) -0.005(5) 0.006(6)
C65 0.026(6) 0.041(7) 0.060(8) -0.011(6) 0.018(6) -0.009(5)
C66 0.034(6) 0.030(6) 0.039(6) -0.003(5) 0.012(5) -0.005(5)
C67 0.026(5) 0.037(6) 0.022(5) -0.004(4) 0.007(4) 0.000(5)
C68 0.028(5) 0.033(6) 0.019(5) -0.004(4) 0.009(4) -0.001(5)
N2 0.026(5) 0.024(5) 0.020(4) 0.003(3) 0.008(3) 0.004(4)
C69 0.015(5) 0.031(5) 0.021(5) 0.001(4) -0.003(4) 0.002(4)
O2 0.033(4) 0.032(4) 0.029(4) 0.001(3) 0.004(3) 0.004(3)
C70 0.021(5) 0.024(5) 0.020(5) 0.001(4) -0.004(4) 0.000(4)
C71 0.0105(16) 0.0105(16) 0.0105(15) 0.0000(2) 0.0022(4) -0.0001(2)
C72 0.032(6) 0.045(7) 0.030(6) -0.010(5) 0.002(5) 0.006(5)
C73 0.035(6) 0.052(7) 0.024(5) 0.006(5) 0.011(5) 0.001(6)
S2 0.0401(16) 0.0511(18) 0.0371(15) 0.0093(14) 0.0101(13) 0.0017(15)
 
_geom_special_details
;
 All esds (except the esd in the dihedral angle between two l.s. planes)
 are estimated using the full covariance matrix.  The cell esds are taken
 into account individually in the estimation of esds in distances, angles
 and torsion angles; correlations between esds in cell parameters are only
 used when they are defined by crystal symmetry.  An approximate (isotropic)
 treatment of cell esds is used for estimating esds involving l.s. planes.
;
 
loop_
 _geom_bond_atom_site_label_1
 _geom_bond_atom_site_label_2
 _geom_bond_distance
 _geom_bond_site_symmetry_2
 _geom_bond_publ_flag
Au1 C1 2.038(10) . ?
Au1 P1 2.276(3) . ?
C1 C6 1.389(14) . ?
C1 C2 1.390(14) . ?
C2 F1 1.355(12) . ?
C2 C3 1.374(14) . ?
C3 F2 1.333(12) . ?
C3 C4 1.371(16) . ?
C4 F3 1.337(12) . ?
C4 C5 1.377(16) . ?
C5 F4 1.354(12) . ?
C5 C6 1.373(14) . ?
C6 F5 1.355(11) . ?
P1 C11 1.810(10) . ?
P1 C21 1.824(11) . ?
P1 C27 1.826(10) . ?
C11 C16 1.387(14) . ?
C11 C12 1.396(14) . ?
C12 C13 1.378(15) . ?
C13 C14 1.368(16) . ?
C14 C15 1.377(16) . ?
C15 C16 1.379(15) . ?
C21 C26 1.390(14) . ?
C21 C22 1.395(14) . ?
C22 C23 1.383(15) . ?
C23 C24 1.380(16) . ?
C24 C25 1.354(18) . ?
C25 C26 1.392(17) . ?
C27 C28 1.513(13) . ?
C28 N1 1.458(12) . ?
N1 C29 1.326(12) . ?
C29 O1 1.244(11) . ?
C29 C30 1.481(13) . ?
C30 C31 1.344(16) . ?
C30 S1 1.710(11) . ?
C31 C32 1.435(18) . ?
C32 C33 1.349(19) . ?
C33 S1 1.683(12) . ?
Au2 C41 2.046(10) . ?
Au2 P2 2.273(3) . ?
C41 C46 1.369(16) . ?
C41 C42 1.398(15) . ?
C42 C43 1.364(16) . ?
C42 F6 1.364(12) . ?
C43 F7 1.352(13) . ?
C43 C44 1.374(18) . ?
C44 F8 1.352(13) . ?
C44 C45 1.369(18) . ?
C45 F9 1.346(13) . ?
C45 C46 1.373(16) . ?
C46 F10 1.357(13) . ?
P2 C61 1.816(11) . ?
P2 C67 1.827(10) . ?
P2 C51 1.835(10) . ?
C51 C56 1.374(14) . ?
C51 C52 1.397(14) . ?
C52 C53 1.384(15) . ?
C53 C54 1.368(16) . ?
C54 C55 1.378(15) . ?
C55 C56 1.400(15) . ?
C61 C62 1.373(15) . ?
C61 C66 1.390(15) . ?
C62 C63 1.377(16) . ?
C63 C64 1.384(17) . ?
C64 C65 1.362(17) . ?
C65 C66 1.382(15) . ?
C67 C68 1.523(13) . ?
C68 N2 1.461(11) . ?
N2 C69 1.335(12) . ?
C69 O2 1.243(12) . ?
C69 C70 1.490(13) . ?
C70 C71 1.494(12) . ?
C70 S2 1.700(10) . ?
C71 C72 1.413(13) . ?
C72 C73 1.366(16) . ?
C73 S2 1.675(11) . ?
C100 Cl6 1.56(3) . ?
C100 Cl3 1.614(17) . ?
C100 Cl1 1.65(2) . ?
C100 Cl2 1.654(17) . ?
C100 Cl4 1.71(3) . ?
C100 Cl5 2.11(3) . ?
Cl1 Cl4 1.37(5) . ?
Cl1 Cl1 2.19(10) 3_766 ?
Cl2 Cl6 1.18(2) . ?
Cl3 Cl5 1.62(2) . ?
Cl3 Cl4 2.27(2) . ?
Cl5 Cl6 1.84(3) . ?
 
loop_
 _geom_angle_atom_site_label_1
 _geom_angle_atom_site_label_2
 _geom_angle_atom_site_label_3
 _geom_angle
 _geom_angle_site_symmetry_1
 _geom_angle_site_symmetry_3
 _geom_angle_publ_flag
C1 Au1 P1 175.9(3) . . ?
C6 C1 C2 114.0(9) . . ?
C6 C1 Au1 120.2(8) . . ?
C2 C1 Au1 125.7(8) . . ?
F1 C2 C3 116.8(10) . . ?
F1 C2 C1 119.1(9) . . ?
C3 C2 C1 124.0(10) . . ?
F2 C3 C4 119.0(10) . . ?
F2 C3 C2 121.6(11) . . ?
C4 C3 C2 119.4(10) . . ?
F3 C4 C3 121.4(10) . . ?
F3 C4 C5 119.3(10) . . ?
C3 C4 C5 119.3(10) . . ?
F4 C5 C6 120.5(10) . . ?
F4 C5 C4 119.8(10) . . ?
C6 C5 C4 119.7(10) . . ?
F5 C6 C5 117.0(9) . . ?
F5 C6 C1 119.4(9) . . ?
C5 C6 C1 123.6(10) . . ?
C11 P1 C21 109.1(4) . . ?
C11 P1 C27 105.2(4) . . ?
C21 P1 C27 104.3(5) . . ?
C11 P1 Au1 114.7(3) . . ?
C21 P1 Au1 112.1(3) . . ?
C27 P1 Au1 110.6(3) . . ?
C16 C11 C12 118.9(9) . . ?
C16 C11 P1 117.5(7) . . ?
C12 C11 P1 123.6(8) . . ?
C13 C12 C11 120.2(10) . . ?
C14 C13 C12 120.1(11) . . ?
C13 C14 C15 120.6(11) . . ?
C14 C15 C16 119.8(11) . . ?
C15 C16 C11 120.4(10) . . ?
C26 C21 C22 118.8(10) . . ?
C26 C21 P1 119.3(8) . . ?
C22 C21 P1 121.9(8) . . ?
C23 C22 C21 120.7(10) . . ?
C24 C23 C22 119.0(12) . . ?
C25 C24 C23 121.3(12) . . ?
C24 C25 C26 120.3(11) . . ?
C21 C26 C25 119.9(11) . . ?
C28 C27 P1 111.1(6) . . ?
N1 C28 C27 111.1(8) . . ?
C29 N1 C28 124.5(8) . . ?
O1 C29 N1 123.6(8) . . ?
O1 C29 C30 121.0(9) . . ?
N1 C29 C30 115.4(8) . . ?
C31 C30 C29 128.8(10) . . ?
C31 C30 S1 110.9(9) . . ?
C29 C30 S1 120.1(7) . . ?
C30 C31 C32 112.5(12) . . ?
C33 C32 C31 111.9(12) . . ?
C32 C33 S1 111.9(10) . . ?
C33 S1 C30 92.6(6) . . ?
C41 Au2 P2 170.6(3) . . ?
C46 C41 C42 113.4(10) . . ?
C46 C41 Au2 123.4(8) . . ?
C42 C41 Au2 121.9(8) . . ?
C43 C42 F6 117.4(10) . . ?
C43 C42 C41 123.8(11) . . ?
F6 C42 C41 118.8(10) . . ?
F7 C43 C42 120.3(12) . . ?
F7 C43 C44 120.1(11) . . ?
C42 C43 C44 119.6(11) . . ?
F8 C44 C45 122.2(12) . . ?
F8 C44 C43 118.5(11) . . ?
C45 C44 C43 119.4(11) . . ?
F9 C45 C44 118.9(11) . . ?
F9 C45 C46 122.4(12) . . ?
C44 C45 C46 118.8(11) . . ?
F10 C46 C41 119.0(10) . . ?
F10 C46 C45 115.9(11) . . ?
C41 C46 C45 125.1(11) . . ?
C61 P2 C67 106.7(5) . . ?
C61 P2 C51 104.5(5) . . ?
C67 P2 C51 105.9(5) . . ?
C61 P2 Au2 116.3(4) . . ?
C67 P2 Au2 114.7(4) . . ?
C51 P2 Au2 107.8(3) . . ?
C56 C51 C52 119.9(10) . . ?
C56 C51 P2 121.7(8) . . ?
C52 C51 P2 118.4(8) . . ?
C53 C52 C51 119.4(10) . . ?
C54 C53 C52 121.2(10) . . ?
C53 C54 C55 119.4(10) . . ?
C54 C55 C56 120.5(11) . . ?
C51 C56 C55 119.6(10) . . ?
C62 C61 C66 119.3(11) . . ?
C62 C61 P2 123.4(9) . . ?
C66 C61 P2 117.2(8) . . ?
C61 C62 C63 120.3(12) . . ?
C62 C63 C64 120.4(12) . . ?
C65 C64 C63 119.4(11) . . ?
C64 C65 C66 120.8(11) . . ?
C65 C66 C61 119.8(11) . . ?
C68 C67 P2 110.6(6) . . ?
N2 C68 C67 111.9(8) . . ?
C69 N2 C68 120.9(9) . . ?
O2 C69 N2 123.1(9) . . ?
O2 C69 C70 120.6(9) . . ?
N2 C69 C70 116.3(9) . . ?
C69 C70 C71 130.2(8) . . ?
C69 C70 S2 116.9(7) . . ?
C71 C70 S2 112.9(7) . . ?
C72 C71 C70 105.8(8) . . ?
C73 C72 C71 115.9(10) . . ?
C72 C73 S2 113.5(8) . . ?
C73 S2 C70 91.9(5) . . ?
Cl6 C100 Cl3 106(2) . . ?
Cl6 C100 Cl1 130(3) . . ?
Cl3 C100 Cl1 108(2) . . ?
Cl6 C100 Cl2 43.1(10) . . ?
Cl3 C100 Cl2 145(2) . . ?
Cl1 C100 Cl2 107(2) . . ?
Cl6 C100 Cl4 100(2) . . ?
Cl3 C100 Cl4 85.9(14) . . ?
Cl1 C100 Cl4 48(2) . . ?
Cl2 C100 Cl4 112.0(17) . . ?
Cl6 C100 Cl5 57.9(15) . . ?
Cl3 C100 Cl5 49.4(11) . . ?
Cl1 C100 Cl5 148(3) . . ?
Cl2 C100 Cl5 96.2(16) . . ?
Cl4 C100 Cl5 102.8(16) . . ?
Cl4 Cl1 C100 68(2) . . ?
Cl4 Cl1 Cl1 107(4) . 3_766 ?
C100 Cl1 Cl1 94(3) . 3_766 ?
Cl6 Cl2 C100 64.1(15) . . ?
C100 Cl3 Cl5 81.6(16) . . ?
C100 Cl3 Cl4 48.8(13) . . ?
Cl5 Cl3 Cl4 99.6(11) . . ?
Cl1 Cl4 C100 63.6(15) . . ?
Cl1 Cl4 Cl3 89(2) . . ?
C100 Cl4 Cl3 45.3(7) . . ?
Cl3 Cl5 Cl6 93.9(12) . . ?
Cl3 Cl5 C100 49.1(8) . . ?
Cl6 Cl5 C100 45.7(9) . . ?
Cl2 Cl6 C100 72.9(15) . . ?
Cl2 Cl6 Cl5 137(2) . . ?
C100 Cl6 Cl5 76.3(16) . . ?
 
loop_
 _geom_hbond_atom_site_label_D 
 _geom_hbond_atom_site_label_H 
 _geom_hbond_atom_site_label_A 
 _geom_hbond_distance_DH 
 _geom_hbond_distance_HA 
 _geom_hbond_distance_DA 
 _geom_hbond_angle_DHA 
 _geom_hbond_site_symmetry_A 
C73 H73 F4  0.95 2.54 3.262(13) 132.8 2_655
C63 H63 F4  0.95 2.52 3.345(13) 144.9 2
N2 H2 O1  0.82(10) 2.09(10) 2.897(11) 167(9) 4_565
C54 H54 F5  0.95 2.39 3.212(12) 145.2 3_666
N1 H1 O2  0.88 2.13 2.918(11) 148.1 3_666
C16 H16 F3  0.95 2.53 3.372(13) 148.3 3_656
C32 H32 F5  0.95 2.45 3.156(15) 131.1 4_666
 
_refine_diff_density_max    2.092
_refine_diff_density_min   -1.791
_refine_diff_density_rms    0.169

_shelx_res_file
;

    c134s.res created by SHELXL-2014/7


TITL c134s in P2(1)/n
CELL 0.71073  12.7095  17.0452  24.6879  90.000 101.837  90.000
ZERR    8.00   0.0025   0.0034   0.0049   0.000   0.030   0.000
LATT 1
SYMM 0.5-X, 0.5+Y, 0.5-Z
SFAC C  H  N  O  F  P  S  Au Cl
UNIT 204 144 8 8 40 8 8 8 12
LIST 4 ! automatically inserted. Change 6 to 4 for CHECKCIF!!
OMIT 1 3 0
OMIT -1 3 1
OMIT 1 12 3
OMIT 12 8 0
OMIT 1 10 2
OMIT 2 0 2
OMIT 3 12 7
OMIT 0 3 1
OMIT -2 16 6
OMIT -14 2 6
OMIT 1 10 6
OMIT -10 14 1
OMIT  -2.00  51.00
L.S. 20
ACTA
BOND
FMAP 2
PLAN 10
EQIV $11 -x+1/2+1,y+1/2,-z+1/2
EQIV $9 -x+1/2,y+1/2,-z+1/2
EQIV $8 x-1/2,-y+1/2,z-1/2
EQIV $5 -x+1,-y+1,-z+1
EQIV $3 -x+1,-y,-z+1
EQIV $1 x+1/2,-y+1/2,z+1/2
HTAB C73 F4_$11
HTAB C63 F4_$9
HTAB N2 O1_$8
HTAB C54 F5_$5
HTAB N1 O2_$5
HTAB C16 F3_$3
HTAB C32 F5_$1
ISOR C71 0.0002
SADI C100 Cl1 C100 Cl2 C100 Cl3
SIZE 0.35 0.10 0.08
TEMP -173
ISOR C100 0.005
ISOR Cl1 0.005
WGHT    0.000000   83.529900
FVAR       0.10234
AU1   8    0.572907    0.146252    0.616302    11.00000    0.02738    0.02994 =
         0.02304   -0.00323    0.00359    0.00083
C1    1    0.619105    0.066187    0.564446    11.00000    0.02053    0.03291 =
         0.02213   -0.00377   -0.00543    0.00207
C2    1    0.591372   -0.012812    0.561109    11.00000    0.02287    0.03697 =
         0.02353   -0.00269   -0.00057    0.00275
C3    1    0.626895   -0.065609    0.526776    11.00000    0.03639    0.03001 =
         0.03182   -0.00985   -0.00651    0.00194
C4    1    0.693683   -0.040426    0.493199    11.00000    0.03934    0.03630 =
         0.02292   -0.00773   -0.00179    0.00718
C5    1    0.723817    0.037245    0.494596    11.00000    0.02830    0.04825 =
         0.01915   -0.00436    0.00481    0.00165
C6    1    0.687359    0.088135    0.529764    11.00000    0.02702    0.02794 =
         0.02350    0.00109   -0.00061    0.00100
F1    5    0.525085   -0.040809    0.593145    11.00000    0.03669    0.04587 =
         0.03037    0.00106    0.00637   -0.00661
F2    5    0.598644   -0.140991    0.525513    11.00000    0.06918    0.03304 =
         0.03871   -0.00628    0.00242   -0.00098
F3    5    0.730845   -0.089851    0.459462    11.00000    0.07471    0.05208 =
         0.03470   -0.01439    0.01318    0.01628
F4    5    0.790041    0.062695    0.461739    11.00000    0.04909    0.06893 =
         0.03225   -0.00368    0.02014   -0.00474
F5    5    0.720905    0.163579    0.529838    11.00000    0.04462    0.03425 =
         0.03092   -0.00315    0.00409   -0.00874
P1    6    0.533451    0.239131    0.675325    11.00000    0.02398    0.02597 =
         0.02519   -0.00164    0.00388    0.00099
C11   1    0.409368    0.222751    0.698771    11.00000    0.02371    0.02370 =
         0.02208    0.00683    0.00673    0.00502
C12   1    0.389087    0.252461    0.748335    11.00000    0.02887    0.03946 =
         0.03760   -0.00912    0.00925   -0.00415
AFIX  43
H12   2    0.441377    0.284200    0.771362    11.00000   -1.20000
AFIX   0
C13   1    0.293429    0.235866    0.763935    11.00000    0.03853    0.04478 =
         0.03259    0.00208    0.01279   -0.00194
AFIX  43
H13   2    0.279881    0.256240    0.797665    11.00000   -1.20000
AFIX   0
C14   1    0.217947    0.190128    0.730966    11.00000    0.03172    0.04469 =
         0.03775    0.01409    0.01037    0.00516
AFIX  43
H14   2    0.152547    0.178352    0.742191    11.00000   -1.20000
AFIX   0
C15   1    0.235936    0.161002    0.681639    11.00000    0.02754    0.04753 =
         0.03830    0.00475   -0.00158   -0.00792
AFIX  43
H15   2    0.182831    0.129697    0.658779    11.00000   -1.20000
AFIX   0
C16   1    0.331269    0.177397    0.665501    11.00000    0.02407    0.05126 =
         0.02852    0.00412    0.00481    0.00283
AFIX  43
H16   2    0.343497    0.157492    0.631382    11.00000   -1.20000
AFIX   0
C21   1    0.531935    0.337677    0.646421    11.00000    0.01494    0.03729 =
         0.02730    0.00419   -0.00002   -0.00156
C22   1    0.531732    0.404540    0.678996    11.00000    0.02395    0.03372 =
         0.03074   -0.00350   -0.00299    0.00452
AFIX  43
H22   2    0.528430    0.399131    0.716910    11.00000   -1.20000
AFIX   0
C23   1    0.536286    0.478627    0.656711    11.00000    0.03520    0.03176 =
         0.04176    0.01171   -0.00362    0.00103
AFIX  43
H23   2    0.537071    0.523984    0.679152    11.00000   -1.20000
AFIX   0
C24   1    0.539672    0.485693    0.601409    11.00000    0.05118    0.04557 =
         0.04247    0.01997   -0.00140    0.00484
AFIX  43
H24   2    0.542987    0.536439    0.585935    11.00000   -1.20000
AFIX   0
C25   1    0.538363    0.421732    0.568785    11.00000    0.06817    0.06574 =
         0.03069    0.01129    0.01365   -0.00391
AFIX  43
H25   2    0.539819    0.427988    0.530708    11.00000   -1.20000
AFIX   0
C26   1    0.534890    0.346801    0.590811    11.00000    0.04819    0.04174 =
         0.03057    0.00744    0.00960    0.00107
AFIX  43
H26   2    0.534541    0.302010    0.567876    11.00000   -1.20000
AFIX   0
C27   1    0.637928    0.242942    0.738247    11.00000    0.02858    0.02604 =
         0.02333   -0.00131    0.00728    0.00045
AFIX  23
H27A  2    0.624427    0.288067    0.761135    11.00000   -1.20000
H27B  2    0.635262    0.194471    0.760017    11.00000   -1.20000
AFIX   0
C28   1    0.748302    0.251024    0.724718    11.00000    0.02280    0.03216 =
         0.02033    0.00143    0.00045    0.00165
AFIX  23
H28A  2    0.761648    0.206058    0.701653    11.00000   -1.20000
H28B  2    0.751114    0.299657    0.703138    11.00000   -1.20000
AFIX   0
N1    3    0.831738    0.253611    0.774984    11.00000    0.03013    0.02671 =
         0.02243   -0.00791    0.00190    0.00734
AFIX  43
H1    2    0.829280    0.292047    0.798490    11.00000   -1.20000
AFIX   0
C29   1    0.911062    0.202016    0.787701    11.00000    0.01774    0.02617 =
         0.02100    0.00027    0.00162   -0.00673
O1    4    0.923258    0.145597    0.757618    11.00000    0.02993    0.02718 =
         0.02859   -0.00938   -0.00077    0.00351
C30   1    0.987147    0.216054    0.840864    11.00000    0.02416    0.02684 =
         0.03347   -0.00893    0.00152   -0.00343
C31   1    0.973729    0.260253    0.884035    11.00000    0.05611    0.11384 =
         0.05704   -0.04743   -0.02748    0.04796
AFIX  43
H31   2    0.911488    0.290995    0.884300    11.00000   -1.20000
AFIX   0
C32   1    1.063908    0.255816    0.929671    11.00000    0.05588    0.12925 =
         0.06187   -0.05534   -0.02204    0.03415
AFIX  43
H32   2    1.067644    0.282195    0.963911    11.00000   -1.20000
AFIX   0
C33   1    1.142720    0.209724    0.918146    11.00000    0.03136    0.07264 =
         0.04256   -0.01161   -0.00891    0.00332
AFIX  43
H33   2    1.210278    0.202187    0.942455    11.00000   -1.20000
AFIX   0
S1    7    1.107108    0.167149    0.855561    11.00000    0.03104    0.05232 =
         0.03389   -0.00600    0.00065    0.00889
AU2   8    0.050182    0.398271    0.344807    11.00000    0.03244    0.03320 =
         0.03282    0.00440    0.01232   -0.00021
C41   1    0.080557    0.319472    0.408656    11.00000    0.04396    0.02509 =
         0.03643    0.00765    0.00874    0.00130
C42   1   -0.002269    0.281996    0.428111    11.00000    0.03350    0.03176 =
         0.03731   -0.00412    0.00194   -0.00025
C43   1    0.012510    0.241543    0.476758    11.00000    0.06428    0.03469 =
         0.03391   -0.01036    0.02452   -0.02022
C44   1    0.113455    0.237109    0.509798    11.00000    0.06480    0.02846 =
         0.03117    0.00088    0.00597    0.00138
C45   1    0.198121    0.271778    0.492642    11.00000    0.04626    0.03769 =
         0.04583    0.00343   -0.00290    0.00334
C46   1    0.179186    0.310933    0.442983    11.00000    0.03882    0.03085 =
         0.06084    0.01100    0.01062   -0.00485
F6    5   -0.104218    0.285894    0.397230    11.00000    0.03902    0.06362 =
         0.04228    0.00525    0.00449   -0.01111
F7    5   -0.071689    0.206531    0.492661    11.00000    0.06423    0.05061 =
         0.04618    0.00096    0.02673   -0.01757
F8    5    0.125306    0.199279    0.558806    11.00000    0.08912    0.03596 =
         0.03561    0.00563    0.00664    0.00651
F9    5    0.296565    0.267552    0.525514    11.00000    0.05112    0.05374 =
         0.07058    0.00359   -0.00964   -0.00104
F10   5    0.266279    0.344422    0.428486    11.00000    0.03873    0.05875 =
         0.08763    0.02635    0.01196   -0.00495
P2    6    0.018948    0.501033    0.284974    11.00000    0.02515    0.03030 =
         0.02450   -0.00256    0.00628   -0.00197
C51   1    0.056315    0.591227    0.324879    11.00000    0.03068    0.03462 =
         0.02017   -0.00201    0.00488   -0.00642
C52   1    0.141496    0.588161    0.370671    11.00000    0.03528    0.04091 =
         0.02599   -0.00059    0.00370    0.00712
AFIX  43
H52   2    0.180181    0.540708    0.379992    11.00000   -1.20000
AFIX   0
C53   1    0.169018    0.654880    0.402337    11.00000    0.04138    0.04643 =
         0.02376   -0.00827   -0.00232   -0.00704
AFIX  43
H53   2    0.226920    0.652799    0.433502    11.00000   -1.20000
AFIX   0
C54   1    0.114375    0.723762    0.389583    11.00000    0.03674    0.03877 =
         0.03293   -0.01363    0.01034   -0.00710
AFIX  43
H54   2    0.134541    0.769232    0.411510    11.00000   -1.20000
AFIX   0
C55   1    0.029800    0.726646    0.344645    11.00000    0.03361    0.03822 =
         0.03854   -0.00617    0.00743   -0.00101
AFIX  43
H55   2   -0.009446    0.774031    0.336099    11.00000   -1.20000
AFIX   0
C56   1    0.001311    0.660269    0.311506    11.00000    0.02898    0.03088 =
         0.03216   -0.00274   -0.00118    0.00141
AFIX  43
H56   2   -0.055716    0.662936    0.279955    11.00000   -1.20000
AFIX   0
C61   1   -0.119881    0.516548    0.250244    11.00000    0.03553    0.03202 =
         0.02607   -0.01359    0.00435   -0.00879
C62   1   -0.149222    0.549816    0.198708    11.00000    0.03015    0.05895 =
         0.03070   -0.01274    0.00313    0.00080
AFIX  43
H62   2   -0.095712    0.562894    0.178430    11.00000   -1.20000
AFIX   0
C63   1   -0.255854    0.564325    0.176261    11.00000    0.03976    0.07342 =
         0.02919   -0.01717   -0.00535    0.00692
AFIX  43
H63   2   -0.275600    0.586693    0.140363    11.00000   -1.20000
AFIX   0
C64   1   -0.334421    0.546490    0.205724    11.00000    0.02304    0.06460 =
         0.04618   -0.02282   -0.00455    0.00578
AFIX  43
H64   2   -0.407848    0.557239    0.190427    11.00000   -1.20000
AFIX   0
C65   1   -0.305522    0.513395    0.256841    11.00000    0.02592    0.04131 =
         0.06048   -0.01103    0.01834   -0.00897
AFIX  43
H65   2   -0.359241    0.501131    0.277176    11.00000   -1.20000
AFIX   0
C66   1   -0.198925    0.497452    0.279462    11.00000    0.03402    0.02975 =
         0.03939   -0.00279    0.01248   -0.00473
AFIX  43
H66   2   -0.179736    0.473517    0.314868    11.00000   -1.20000
AFIX   0
C67   1    0.098656    0.500359    0.231223    11.00000    0.02642    0.03686 =
         0.02212   -0.00434    0.00738    0.00036
AFIX  23
H67A  2    0.077965    0.454665    0.206587    11.00000   -1.20000
H67B  2    0.083742    0.548575    0.208592    11.00000   -1.20000
AFIX   0
C68   1    0.218149    0.496037    0.256889    11.00000    0.02753    0.03331 =
         0.01870   -0.00354    0.00937   -0.00092
AFIX  23
H68A  2    0.240634    0.545315    0.277212    11.00000   -1.20000
H68B  2    0.231038    0.452302    0.283825    11.00000   -1.20000
AFIX   0
N2    3    0.283118    0.484107    0.215146    11.00000    0.02593    0.02429 =
         0.02020    0.00328    0.00775    0.00367
H2    2    0.319820    0.444182    0.221935    11.00000    0.01821
C69   1    0.297373    0.541961    0.180887    11.00000    0.01511    0.03056 =
         0.02097    0.00103   -0.00345    0.00192
O2    4    0.252629    0.606900    0.180151    11.00000    0.03299    0.03217 =
         0.02948    0.00068    0.00390    0.00439
C70   1    0.369543    0.524449    0.141892    11.00000    0.02058    0.02441 =
         0.01985    0.00102   -0.00378    0.00050
C71   1    0.421116    0.449114    0.130497    11.00000    0.01048    0.01052 =
         0.01047   -0.00001    0.00216   -0.00005
AFIX  43
H71   2    0.415616    0.399725    0.147530    11.00000   -1.20000
AFIX   0
C72   1    0.479767    0.466511    0.089146    11.00000    0.03224    0.04468 =
         0.03003   -0.01019    0.00171    0.00606
AFIX  43
H72   2    0.519248    0.427555    0.074300    11.00000   -1.20000
AFIX   0
C73   1    0.476209    0.542747    0.071840    11.00000    0.03470    0.05240 =
         0.02356    0.00604    0.01069    0.00135
AFIX  43
H73   2    0.512858    0.561216    0.044450    11.00000   -1.20000
AFIX   0
S2    7    0.400962    0.600547    0.103583    11.00000    0.04009    0.05112 =
         0.03710    0.00926    0.01009    0.00169
C100  1    0.845208    0.534050    0.470016    11.00000    0.16985
CL1   9    0.928560    0.462996    0.495920    10.30000    0.29910
CL2   9    0.731845    0.517638    0.491177    10.50000    0.09344
CL3   9    0.901015    0.583766    0.427913    10.50000    0.18566
CL4   9    0.888325    0.452719    0.440429    10.70000    0.16336
CL5   9    0.776527    0.603211    0.400752    10.50000    0.10304
CL6   9    0.723129    0.530590    0.443427    10.50000    0.23019
HKLF 4

REM  c134s in P2(1)/n
REM R1 =  0.0690 for    8537 Fo > 4sig(Fo)  and  0.0810 for all    9695 data
REM    663 parameters refined using      9 restraints

END

WGHT      0.0000     91.3427

REM Highest difference peak  2.092,  deepest hole -1.791,  1-sigma level  0.169
Q1    1   0.7031  0.5351  0.4591  11.00000  0.05    2.09
Q2    1   0.8963  0.4258  0.4730  11.00000  0.05    2.06
Q3    1   0.7623  0.5294  0.4189  11.00000  0.05    1.71
Q4    1   0.8563  0.6064  0.4110  11.00000  0.05    1.68
Q5    1   0.5003  0.1450  0.6218  11.00000  0.05    1.62
Q6    1   0.4417  0.4252  0.1412  11.00000  0.05    1.48
Q7    1   0.9387  0.5012  0.4883  11.00000  0.05    1.48
Q8    1   0.1210  0.4026  0.3380  11.00000  0.05    1.43
Q9    1   0.6468  0.1421  0.6071  11.00000  0.05    1.43
Q10   1   0.9190  0.4804  0.4303  11.00000  0.05    1.40
;
_shelx_res_checksum   77139

_shelx_hkl_file
;
   3   0   0   -2.53   12.69   8
   3   0   0    9.71    3.76   1
  -4   0   0  108.65    7.77   7
   4   0   0  111.98    4.93   8
   4   0   0  121.32    4.82   9
   5   0   0    4.30    3.53   9
  -5   0   0   -1.78    0.98   7
   5   0   0   -0.77    1.42   8
   6   0   0 1472.15   50.25   8
   6   0   0 1464.56   46.40   9
  -6   0   0 1483.06   65.02   7
  -6   0   0 1470.43   44.99  10
  -7   0   0    4.05    2.18  10
   7   0   0    7.63    2.76   8
   8   0   0  466.18   17.01   8
  -8   0   0  464.83   15.15  10
   8   0   0  458.86   16.06   9
  -9   0   0    0.56    3.66  10
   9   0   0   -0.78    2.54   9
  10   0   0   64.85    7.24   9
  10   0   0   63.54    6.58   8
 -10   0   0   54.08    5.62  10
 -11   0   0    2.20   10.57  10
  12   0   0    4.15    4.63   9
 -12   0   0    0.86    3.10  10
  12   0   0    5.40    7.80   8
 -13   0   0    7.50    4.65  10
  14   0   0    2.56   19.96   9
 -14   0   0   -0.95    5.26  10
  15   0   0   -1.90    6.21   9
  16   0   0    9.95   10.01   9
  17   0   0    4.96    7.90   9
  19   0   0    2.86    6.26   9
 -19   0   0    9.05   13.85  11
   3  -1   0   71.95    5.43   1
  -3  -1   0   53.77    6.94   7
   3   1   0   64.93    3.70   9
   3  -1   0   60.99    3.35   8
  -3   1   0   63.61    2.90  10
  -3   1   0   57.47    6.53   7
   3   1   0   59.90    3.83   8
   4  -1   0 1411.49   62.99   1
   4  -1   0 1507.98   49.13   8
  -4   1   0 1399.18   63.57   7
  -4  -1   0 1418.51   63.51   7
   4   1   0 1476.19   49.26   8
   4   1   0 1458.49   45.41   9
  -4   1   0 1467.46   44.00  10
   5  -1   0  158.95    6.29   8
   5   1   0  162.35    6.41   9
  -5   1   0  154.51    9.83   7
  -5  -1   0  145.42    9.59   7
  -5   1   0  155.45    5.59  10
   5   1   0  161.12    6.56   8
   5  -1   0  161.17    9.01   1
  -6   1   0  329.66   17.11   7
   6  -1   0  344.14   11.69   9
   6  -1   0  346.47   12.32   8
   6  -1   0  330.76   16.69   1
   6   1   0  332.17   12.52   8
  -6  -1   0  339.25   16.80   7
  -6   1   0  343.66   11.02  10
   6   1   0  336.89   11.81   9
   7  -1   0  236.46    8.77   9
  -7   1   0  232.81    8.02  10
  -7  -1   0  220.37    8.17  10
   7   1   0  216.07    9.26   8
  -7   1   0  214.63   13.69   7
   7   1   0  228.40    9.01   9
   7  -1   0  226.77    9.05   8
   8   1   0    8.25    4.14   9
   8  -1   0    9.94    4.41   8
  -8   1   0   11.81    3.80  10
   8   1   0   10.89    4.92   8
  -8  -1   0    6.59    6.27  10
   8  -1   0   12.02    4.23   9
   9   1   0  266.34   11.55   8
  -9  -1   0  283.82   10.20  10
   9  -1   0  274.41   11.37   8
  -9   1   0  276.20   10.02  10
   9  -1   0  269.12   10.97   9
   9   1   0  277.47   11.35   9
  10  -1   0   23.11    6.23   9
  10  -1   0   30.05    5.87   8
  10   1   0   24.72    7.25   9
 -10   1   0   23.20    5.41  10
  10   1   0   19.94    5.31   8
 -10  -1   0   18.99    5.61  10
  11  -1   0   25.25    7.74   9
  11   1   0   24.14    6.93   8
 -11  -1   0   23.01    5.61  10
  11   1   0   28.97    7.12   9
  11  -1   0   31.11    6.04   8
 -11   1   0   25.14    5.20  10
 -12  -1   0   85.26    6.55  10
  12   1   0   83.24    8.15   8
  12  -1   0   81.03    8.18   9
  12  -1   0   88.48    7.48   8
 -12   1   0   74.05    6.18  10
  12   1   0   92.45    8.02   9
  13   1   0    5.51    7.52   9
  13   1   0    3.15   46.72   8
 -13  -1   0   15.44    5.49  10
  13  -1   0   -0.66    1.71   9
  13  -1   0    1.35    8.02   8
  14  -1   0   12.05    9.43   9
  14   1   0   12.91    8.35   9
 -14  -1   0   12.04    6.33  10
  14   1   0   24.51    8.20   8
  15   1   0   22.35   10.35   9
  15  -1   0   21.95    9.60   9
 -15  -1   0   25.22    6.93  10
  15   1   0   20.22    9.15   8
  16  -1   0   19.92    8.33   9
  17   1   0   15.05    8.52   9
  17  -1   0   23.52    8.58   9
  18   1   0   14.00   11.76   9
 -18   1   0   12.24   13.71  11
  18  -1   0   12.33    7.52   9
  19   1   0    1.18    5.36   9
  -2   2   0   66.58    4.63   7
  -2  -2   0   70.05    2.53   6
   3  -2   0  991.39   43.01   1
   3  -2   0  997.20   33.26   8
  -3   2   0  917.54   43.35   7
  -3   2   0 1000.78   29.82  10
  -3  -2   0  979.32   27.47   6
   3   2   0  966.93   30.95   9
   3   2   0 1009.25   33.58   8
  -4   2   0  179.31    5.74  10
   4   2   0  164.70    6.55   9
  -4   2   0  167.56    9.70   7
   4  -2   0  173.87    9.29   1
   4  -2   0  167.82    6.43   8
   4   2   0  172.11    6.87   8
   5  -2   0 1713.50   77.87   1
  -5   2   0 1866.07   54.36  10
   5   2   0 1810.70   60.94   8
   5  -2   0 1803.71   60.64   8
  -5   2   0 1766.62   78.56   7
   5   2   0 1779.60   56.15   9
  -6   2   0    4.97    8.16   7
   6  -2   0   13.50    3.04   8
   6   2   0   12.11    4.30   8
   6  -2   0   20.62    5.26   1
  -6   2   0   12.72    3.22  10
   6   2   0   10.51    4.64   9
  -7   2   0  248.37   14.49   7
   7   2   0  267.99    9.98   9
   7  -2   0  252.14    9.83   8
   7  -2   0  261.17    9.56   9
   7  -2   0  248.59   14.02   1
  -7   2   0  267.03    8.84  10
   7   2   0  258.49   10.43   8
   8  -2   0    2.15   16.01   8
   8   2   0   -1.73    2.23   8
  -8  -2   0    4.15    4.24  10
   8   2   0    1.43    8.05   9
  -9  -2   0  164.51    7.54  10
   9  -2   0  172.87    8.14   8
  -9   2   0  173.78    7.25  10
   9   2   0  155.96    8.72   9
   9  -2   0  172.22    8.37   9
   9   2   0  178.00    8.86   8
 -10   2   0   -1.26    4.35  10
  10   2   0    9.31    8.08   9
 -10  -2   0    5.37    6.61  10
  10  -2   0    4.24   11.12   8
  10  -2   0    8.14   12.84   9
  10   2   0    6.11   44.75   8
 -11   2   0  396.45   13.43  10
  11  -2   0  396.36   15.12   8
 -11  -2   0  370.62   13.66  10
  11  -2   0  373.39   14.69   9
  11   2   0  367.78   15.07   9
  11   2   0  394.27   15.84   8
  12  -2   0   24.09    7.07   8
  12   2   0   35.71    6.76   9
  12   2   0   35.83    6.90   8
  12  -2   0   44.33    6.83   9
 -12   2   0   27.82    5.43  10
 -12  -2   0   41.37    5.91  10
  13   2   0  176.12   10.73   8
  13  -2   0  173.86    9.92   9
 -13  -2   0  175.81    8.94  10
  13   2   0  176.82   10.77   9
  14  -2   0   -0.41    5.09   9
  14   2   0    1.40   69.69   8
 -14  -2   0    7.52    7.33  10
  14   2   0    4.67    4.88   9
  15   2   0    0.76   16.10   8
  15   2   0   -1.93    8.48   9
  15  -2   0   13.26    6.65   9
 -15  -2   0   11.47    7.44  10
  16  -2   0   -0.76    9.55   9
  16   2   0    5.27    6.56   9
  16   2   0   19.45   10.25   8
  17  -2   0   18.17    8.91   9
 -17   2   0   14.04   13.02  11
  17   2   0   21.99   10.66   9
  18   2   0   19.58    9.47   9
 -19   2   0    9.43   13.60  11
  19   2   0   -2.28   16.33   9
   1   3   0  311.34   10.82   8
  -2   3   0  597.41   26.27  12
  -2   3   0  702.56   31.37   7
   2   3   0  679.72   24.89   3
  -2   3   0  732.94   25.38  11
  -2   3   0  723.99   24.99   3
  -2  -3   0  738.67   19.79   6
   2   3   0  737.38   22.40   9
   2   3   0  746.56   24.34   8
   3   3   0   66.39    3.92   8
  -3   3   0   57.85    5.40  11
  -3   3   0   54.38    3.33  12
   3  -3   0   63.15    5.61   1
  -3   3   0   56.75    6.09   7
   3   3   0   65.98    3.82   9
  -3  -3   0   62.80    2.86   6
   3  -3   0   63.03    2.56   8
  -4   3   0 1164.12   54.44   7
   4   3   0 1229.01   42.25   8
  -4   3   0 1298.01   37.50  10
   4   3   0 1231.64   38.94   9
   4  -3   0 1234.21   41.82   8
  -4  -3   0 1228.87   34.55   6
   4  -3   0 1265.35   54.07   1
  -5   3   0   12.19   10.13   7
   5  -3   0   12.10    4.77   1
   5   3   0   18.01    3.88   9
  -5   3   0   15.73    2.21  10
   5   3   0   16.76    4.06   8
   5  -3   0   19.58    2.34   8
  -6   3   0  375.44   11.46  10
   6   3   0  355.44   13.45   8
   6  -3   0  352.18   17.61   1
  -6   3   0  346.87   17.97   7
   6  -3   0  358.18   12.75   8
   6   3   0  353.84   12.52   9
   7   3   0  478.88   16.55   9
   7  -3   0  469.38   23.05   1
   7   3   0  489.14   17.76   8
  -7   3   0  506.28   15.32  10
   7  -3   0  491.36   17.07   8
  -7   3   0  454.69   23.50   7
   8  -3   0   12.94    6.72   1
  -8  -3   0    8.47    4.69  10
   8  -3   0    1.20   24.59   9
   8   3   0   12.72    6.45   9
   8  -3   0    7.93    4.09   8
   8   3   0    5.27    5.79   8
  -9   3   0  329.01   18.58   7
   9   3   0  315.38   12.86   9
  -9   3   0  330.55   11.23  10
   9  -3   0  330.12   12.54   8
  -9  -3   0  321.80   11.82  10
   9   3   0  320.26   13.57   8
   9  -3   0  324.29   12.33   9
 -10  -3   0   43.94    5.84  10
  10   3   0   30.80    7.77   9
 -10   3   0   27.28    5.42  10
  10   3   0   35.97    7.49   8
  10  -3   0   42.47    6.69   9
  10  -3   0   38.49    5.58   8
  11   3   0   -1.10    4.44   9
  11   3   0   -0.46    1.39   8
 -11  -3   0    1.87   11.67  10
 -11   3   0   -0.05    0.10  10
  11  -3   0    1.25    4.80   9
  11  -3   0   -0.31    1.93   8
  12   3   0   28.13    7.79   8
  12  -3   0   20.64    6.11   9
 -12  -3   0   20.86    6.15  10
  12   3   0   37.06    7.79   9
 -13  -3   0   60.41    6.89  10
  13  -3   0   45.59    7.82   9
  13   3   0   58.27    8.98   9
  13   3   0   48.87    8.58   8
  14  -3   0   30.38    7.72   9
 -14  -3   0   26.59    7.14  10
  14   3   0   30.60    8.95   9
  14   3   0   37.59    9.30   8
 -15   3   0   42.96   10.96  11
  15   3   0   54.73    8.67   8
  15  -3   0   68.18    9.18   9
 -15  -3   0   58.64    7.67  10
  15   3   0   59.76    9.86   9
  16   3   0   14.15    7.86   8
 -16   3   0   22.58   12.02  11
  16  -3   0   19.86    8.51   9
  16   3   0   22.12    9.20   9
 -16  -3   0    2.42    8.72  10
 -17   3   0    6.52    9.63  11
  17   3   0   14.42    8.11   9
  18   3   0    6.11    6.15   9
  19   3   0    8.65    9.34   9
   0   4   0   43.23    2.67   8
   0  -4   0   61.31    2.13   6
   0   4   0   56.83    4.02   3
   0   4   0   54.71    5.13  11
  -1  -4   0   69.22    4.48   2
  -1   4   0   68.47    5.37   7
   1   4   0   76.33    3.86   8
  -1   4   0   74.11    5.20  11
  -1   4   0   79.11    4.29  12
   1   4   0   74.32    4.55   3
   1   4   0   71.55    4.71  11
  -1   4   0   75.32    4.39   3
  -1  -4   0   76.78    2.67   6
   1   4   0   79.89    3.45   9
   2   4   0  567.68   20.29   3
   2   4   0  588.46   18.35   9
  -2   4   0  554.35   20.46   3
  -2  -4   0  579.03   18.62   2
  -2  -4   0  580.29   16.10   6
   2   4   0  586.25   19.93   8
  -2   4   0  586.33   21.60  12
  -2   4   0  548.37   25.60   7
  -2   4   0  563.90   20.81  11
  -3   4   0   26.01    5.44   7
  -3  -4   0   26.22    2.22   6
   3   4   0   27.29    5.04   3
   3  -4   0   28.51    5.26   1
  -3   4   0   31.64    4.64  11
  -3   4   0   29.62    6.04   3
  -3   4   0   27.57    2.80  12
   3   4   0   32.15    3.30   8
   3   4   0   28.97    3.43   9
   4   4   0   23.64    3.52   8
   4   4   0   26.00    3.82   9
   4  -4   0   22.86    1.55   8
  -4   4   0   21.55    6.22  11
  -4   4   0   20.30    2.68  12
  -4  -4   0   23.76    2.44   6
  -4   4   0   15.64    1.47  10
   4  -4   0   22.41    5.73   1
  -4   4   0   22.70    7.40   7
   5  -4   0   47.21    6.04   1
   5  -4   0   40.98    2.41   8
  -5   4   0   35.99    2.18  10
  -5   4   0   34.01    5.60  11
   5   4   0   31.62    4.48   8
   5   4   0   37.58    3.99   9
  -5  -4   0   39.90    3.06   6
  -5   4   0   24.04    9.43   7
   6   4   0 1015.14   31.92   9
  -6   4   0 1016.03   30.37  10
  -6   4   0  989.30   36.11  11
   6  -4   0  978.21   33.89   8
   6   4   0 1000.79   34.61   8
   6  -4   0  977.24   44.36   1
  -6   4   0  985.31   44.67   7
  -7   4   0   10.03  135.28   7
   7  -4   0   22.80    6.05   1
  -7   4   0   13.77    2.91  10
   7   4   0   11.25    6.12   8
   7  -4   0   15.48    2.99   8
   7   4   0   13.15    6.10   9
  -8   4   0  572.85   28.15   7
   8   4   0  564.34   20.00   9
   8  -4   0  600.65   20.52   8
   8   4   0  578.70   21.49   8
   8  -4   0  598.13   19.40   9
  -8   4   0  600.85   18.39  10
   8  -4   0  557.20   27.79   1
   9  -4   0  106.30   11.14   1
   9  -4   0   90.05    5.79   8
   9  -4   0   92.82    6.67   9
  -9   4   0   80.73   14.13   7
   9   4   0   75.26    7.80   8
  -9  -4   0   83.98    6.40  10
   9   4   0   88.03    8.07   9
  -9   4   0   82.49    4.90  10
  10   4   0  240.00   11.46   9
  10   4   0  231.46   11.62   8
  10  -4   0  237.42   10.11   8
  10  -4   0  237.26   10.36   9
 -10   4   0  240.32    8.81  10
 -10  -4   0  238.14   10.00  10
  11   4   0   22.32    8.27   8
  11   4   0   13.57    6.30   9
 -11  -4   0   35.29    6.11  10
  11  -4   0   29.28    5.87   9
 -12  -4   0   13.17    7.02  10
  12   4   0   38.79    8.23   9
  12   4   0   24.20    8.73   8
  12  -4   0   17.04    7.08   9
 -13  -4   0   31.06    7.12  10
  13  -4   0    7.39    9.96   9
  13   4   0   22.11    8.01   8
 -13   4   0   14.64    8.98  11
  13   4   0   13.47    9.11   9
 -14   4   0   20.18   10.35  11
  14   4   0   32.02   10.03   9
  14  -4   0   28.29    7.22   9
 -14  -4   0   31.48    7.37  10
  14   4   0   23.34    7.87   8
  15   4   0   57.52    8.81   9
 -15   4   0   55.00   11.96  11
  15  -4   0   48.05    8.94   9
 -15  -4   0   43.26    7.48  10
  15   4   0   48.19   10.70   8
 -16   4   0   52.80   12.59  11
 -16  -4   0   29.31    7.88  10
  16   4   0   29.56    9.09   8
  16   4   0   19.49    8.41   9
 -17  -4   0   23.58    8.48  10
  17   4   0   47.66    9.61   8
  17   4   0   64.62   11.31   9
 -17   4   0   47.43   13.65  11
  18   4   0   23.04   10.73   9
   0   5   0   -1.10    0.64   3
   0   5   0    0.08    1.56   8
   0  -5   0   -0.36    0.79   6
  -1   5   0  531.45   19.96  12
   1   5   0  551.83   18.21   8
  -1   5   0  528.47   16.43   9
   1   5   0  532.24   18.65   3
  -1  -5   0  528.77   14.67   6
   1   5   0  528.81   16.66   9
  -1   5   0  502.84   18.70   3
  -1  -5   0  511.16   17.06   2
  -1   5   0  522.69   19.12  11
  -1   5   0  534.08   17.88   8
   1   5   0  509.38   19.07  11
  -1   5   0  501.06   23.28   7
  -2   5   0  847.98   39.42   7
  -2   5   0  891.80   32.00  11
   2   5   0  925.89   30.73   8
  -2  -5   0  870.93   28.50   2
   2   5   0  898.08   28.22   9
  -2  -5   0  893.61   24.93   6
  -2   5   0  945.66   33.48  12
   2   5   0  910.95   31.25   3
  -2   5   0  866.24   31.45   3
   3   5   0   48.74    3.79   8
   3   5   0   50.71    3.85   9
  -3   5   0   52.83    4.86  11
  -3   5   0   45.89    5.83   7
  -3   5   0   50.93    3.56  12
   3   5   0   50.17    4.14   3
  -3   5   0   44.41    4.91   3
  -3  -5   0   52.10    2.45   6
  -4   5   0  388.47   19.25   7
  -4  -5   0  410.47   11.83   6
   4   5   0  381.23   15.31   3
  -4   5   0  396.04   15.63  11
  -4   5   0  417.93   15.66  12
   4   5   0  414.01   14.83   8
   4  -5   0  437.15   19.26   1
   4   5   0  414.92   13.68   9
  -5   5   0    5.61   26.02  11
  -5  -5   0    5.48    3.13   6
   5   5   0    3.26   11.59   9
   5  -5   0    3.41    1.55   8
  -5   5   0    5.07    1.39  10
   5   5   0    2.81    3.47   8
   5  -5   0    1.35  444.69   1
  -6   5   0  138.91   10.83   7
   6  -5   0  155.48    9.94   1
   6   5   0  147.43    7.16   8
  -6   5   0  138.74    4.99  10
   6   5   0  147.93    6.94   9
   6  -5   0  135.67    5.46   8
  -6   5   0  140.33    8.33  11
   7  -5   0  185.22   11.69   1
   7  -5   0  178.29    6.95   8
   7   5   0  171.65    8.67   8
   7   5   0  178.93    8.15   9
  -7   5   0  174.47   10.15  11
  -7   5   0  180.69    6.19  10
  -7   5   0  168.58   12.85   7
  -8   5   0  204.30   11.66  11
   8  -5   0  205.39    8.38   8
   8   5   0  210.57    9.89   9
   8   5   0  209.19   10.24   8
   8  -5   0  216.21   13.85   1
   8  -5   0  214.92    8.58   9
  -8   5   0  215.11    7.40  10
  -8   5   0  216.05   14.70   7
  -9  -5   0  242.97   10.06  10
   9   5   0  254.22   11.03   9
   9  -5   0  235.16   15.76   1
  -9   5   0  249.80   13.40  11
  -9   5   0  233.20    8.57  10
   9  -5   0  253.56    9.96   9
   9   5   0  256.89   11.57   8
   9  -5   0  244.23    9.77   8
  -9   5   0  238.94   16.69   7
  10   5   0  144.69    9.92   8
 -10   5   0  165.99   11.69  11
 -10  -5   0  181.40    8.62  10
  10  -5   0  163.75    8.47   9
  10  -5   0  179.62   14.64   1
  10   5   0  165.95    9.94   9
  11  -5   0  234.14   10.22   9
  11   5   0  232.26   11.60   8
 -11  -5   0  220.45    9.94  10
 -11   5   0  236.60   13.34  11
  11   5   0  227.36   11.29   9
  12   5   0   22.64    8.49   8
  12  -5   0   34.84    7.00   9
 -12  -5   0   23.46    5.80  10
  12   5   0   22.90   10.24   9
 -12   5   0   17.05   13.30  11
 -13  -5   0   29.08    7.38  10
  13   5   0   24.93    8.34   8
  13   5   0   11.90    8.25   9
 -13   5   0   23.50   10.64  11
  13  -5   0   18.20    6.50   9
  14   5   0    7.46    9.85   8
 -14  -5   0    4.79    4.52  10
  14   5   0   32.57    7.95   9
 -14   5   0    8.40   11.68  11
  14  -5   0    6.93   10.91   9
  15   5   0    9.84    7.65   8
 -15   5   0   22.94   12.81  11
  15   5   0   13.18    8.50   9
 -15  -5   0   24.09    7.70  10
 -16  -5   0   14.17    8.08  10
 -16   5   0   17.71   11.95  11
  16   5   0   25.87    9.53   8
  16   5   0   25.49   11.70   9
  17   5   0   20.56    8.96   8
 -17   5   0   32.40   13.17  11
 -17  -5   0   12.49    7.64  10
  17   5   0   21.38   10.66   9
  18   5   0   21.01   11.63   9
 -18   5   0   12.66   13.73  11
   0  -6   0   14.66    1.68   6
   0   6   0   12.97    2.38   8
   0   6   0    8.78    7.54  11
   0   6   0   12.15    4.74   3
   0   6   0   15.12    2.07   9
   0   6   0   10.46    4.52   7
   1   6   0   42.25    4.50  11
  -1   6   0   42.98    2.38   8
  -1   6   0   41.67    3.66  12
  -1  -6   0   44.66    1.94   6
  -1   6   0   43.86    4.39  11
   1   6   0   43.86    2.85   9
   1   6   0   40.87    3.20   8
  -1   6   0   42.28    3.84   3
   1   6   0   43.70    3.59   3
  -1   6   0   38.43    4.47   7
  -1   6   0   45.73    2.24   9
  -1  -6   0   46.40    3.86   2
   2   6   0   27.25    3.30   8
  -2   6   0   35.64    4.62  11
  -2   6   0   27.04    4.33   3
   2   6   0   37.41    2.92   9
   2   6   0   31.05    3.64   3
  -2   6   0   37.92    3.41  12
  -2  -6   0   31.21    1.90   6
  -2   6   0   28.92    4.84   7
  -2  -6   0   33.54    3.91   2
   3   6   0 1072.73   37.82   3
   3   6   0 1098.38   34.26   9
  -3   6   0 1038.68   47.83   7
  -3  -6   0 1054.13   34.51   2
  -3  -6   0 1100.30   30.26   6
  -3   6   0 1073.66   38.74  11
  -3   6   0 1131.28   40.50  12
  -3   6   0 1060.90   38.14   3
   3   6   0 1121.66   37.28   8
  -4   6   0   39.95    3.82  12
  -4   6   0   47.18    5.01  11
   4   6   0   44.11    4.71   3
  -4   6   0   34.91    7.68   7
   4  -6   0   36.14    6.95   1
  -4   6   0   43.27    6.21   3
   4   6   0   41.84    4.52   8
   4   6   0   36.59    4.29   9
  -4  -6   0   45.01    2.79   6
  -5   6   0  320.67   17.07   7
   5   6   0  343.17   12.07   9
  -5   6   0  330.03   13.36  12
  -5  -6   0  363.98   10.23   6
  -5   6   0  335.16   13.80  11
   5   6   0  343.34   13.02   8
   5   6   0  329.75   13.68   3
   5  -6   0  348.72   17.02   1
   6  -6   0   69.64    2.93   8
  -6   6   0   64.47    9.94   7
   6  -6   0   74.10    8.39   1
   6   6   0   77.72    5.57   9
  -6   6   0   85.03    6.83  11
   6   6   0   82.70    5.97   8
  -6   6   0   63.72    2.91  10
   7  -6   0   51.65    3.18   8
   7   6   0   57.77    6.03   9
  -7   6   0   69.61   11.11   7
   7   6   0   63.99    6.41   8
  -7   6   0   55.58    3.03  10
  -7   6   0   60.52    8.07  11
   7  -6   0   75.05    8.74   1
   8  -6   0   10.26    8.64   1
   9   6   0    8.94    7.36   8
   9   6   0   13.54    9.07   9
   9  -6   0    9.17    7.10   9
  -9   6   0   26.51   23.25   7
   9  -6   0   31.74    9.54   1
  -9  -6   0   16.81    6.23  10
  -9   6   0   10.03    8.63  11
 -10  -6   0  141.98    8.00  10
  10   6   0  136.87    9.42   9
  10   6   0  129.61    9.12   8
  10  -6   0  154.28   13.59   1
 -10   6   0  129.87   10.78  11
  10  -6   0  138.39    7.76   9
  11   6   0   53.08    7.61   9
  11  -6   0   61.55   11.91   1
 -11  -6   0   48.59    6.67  10
  11  -6   0   58.11    6.44   9
 -11   6   0   60.76    9.60  11
  11   6   0   71.30    8.19   8
 -12   6   0  155.24   12.00  11
  12  -6   0  147.36    8.57   9
  12   6   0  139.09   10.24   8
 -12  -6   0  146.97    8.80  10
  12   6   0  141.10   10.14   9
 -13  -6   0   43.06    7.19  10
  13   6   0   55.74    8.33   9
 -13   6   0   45.55   11.13  11
  13   6   0   56.22    9.01   8
 -14   6   0   79.33   11.81  11
 -14  -6   0   82.56    8.19  10
  14   6   0   77.82    9.84   9
  14   6   0   82.80    9.49   8
  15   6   0   14.19    6.03   8
  15   6   0   37.92    7.42   9
 -15  -6   0   40.89    8.26  10
 -15   6   0   15.33    9.70  11
  16   6   0    4.74    7.68   9
 -16  -6   0   10.75   10.10  10
  16   6   0   16.55    7.82   8
 -16   6   0   25.95   11.14  11
 -17   6   0   15.11   13.99  11
  17   6   0   13.96    9.72   8
 -17  -6   0   20.17    9.65  10
  17   6   0    3.80    3.00   9
 -18   6   0   17.92   15.26  11
  18   6   0   12.22   14.34   8
  18   6   0    4.76   12.21   9
   0  -7   0   -1.87    0.80   6
   0  -7   0    1.30    1.17   5
   0   7   0    1.98    1.35   9
  -1   7   0  226.83   11.58   7
  -1  -7   0  233.26    8.99   2
  -1   7   0  242.46    9.98  11
   1   7   0  254.81    9.52   3
  -1   7   0  245.29    9.71   3
   1   7   0  256.16    9.21   8
  -1  -7   0  241.26    7.07   6
  -1   7   0  247.58   10.26  12
   1   7   0  236.53   10.07  11
   1   7   0  245.28    8.31   9
  -1   7   0  249.43    8.01   9
  -1   7   0  249.46    8.74   8
   2  -7   0   91.65    4.17   4
  -2  -7   0   92.93    5.26   2
  -2   7   0   88.15    5.82   3
  -2  -7   0   90.88    3.23   6
  -2   7   0   94.70    6.14  11
  -2   7   0   87.97    6.56   7
  -2   7   0  104.14    5.33  12
   2   7   0   95.10    4.30   9
   2   7   0   97.10    5.17   3
   2   7   0   92.66    4.84   8
   3   7   0   15.22    3.38   9
  -3   7   0   11.82    9.46   3
  -3   7   0    9.28  760.98  11
  -3   7   0   12.15    4.79  12
  -3   7   0    9.43   10.48   7
  -3  -7   0   14.88    2.22   6
   3   7   0    9.93    4.56   8
  -3  -7   0   16.40    5.23   2
   3   7   0   11.96    3.44   3
   4   7   0  411.36   15.46   3
  -4   7   0  398.51   19.91   7
  -4   7   0  411.98   15.94   3
   4   7   0  434.23   15.45   8
  -4  -7   0  419.67   12.11   6
  -4   7   0  411.94   16.30  11
  -4   7   0  425.96   16.38  12
   4   7   0  420.68   14.14   9
   5   7   0   97.71    6.41   8
  -5   7   0  106.78    7.13  11
  -5   7   0   85.71    9.13   7
   5  -7   0  104.41    8.65   1
   5   7   0  105.59    6.04   9
  -5  -7   0  115.92    4.32   6
  -5   7   0  105.52    5.63  12
   5   7   0  105.39    6.77   3
  -6   7   0  338.32   18.12   7
   6  -7   0  364.97   18.12   1
   6   7   0  349.35   13.74   8
  -6   7   0  337.00   14.52  11
   6   7   0  359.00   12.80   9
   6   7   0  334.28   14.33   3
   7  -7   0  192.46   13.07   1
   7   7   0  189.83    9.35   8
   7   7   0  165.26   11.39   3
   7   7   0  211.47    8.95   9
  -7   7   0  191.78   13.43   7
   7  -7   0  158.25    6.32   8
  -7   7   0  181.92   10.33  11
   8   7   0  133.54    8.47   9
   8   7   0  124.80    8.84   8
  -8   7   0  113.23    9.98  11
  -8   7   0  170.23   14.23   7
   8  -7   0  124.61   11.68   1
   9  -7   0   38.24   10.37   1
   9  -7   0   12.77    4.43   9
  -9  -7   0   11.04    7.15  10
   9   7   0    2.05    4.07   8
  -9   7   0    6.65    6.88  11
 -10  -7   0   -0.64    3.84  10
  10  -7   0    6.01    6.95   9
  10  -7   0   16.56    8.35   1
  10   7   0    8.33   34.24   8
  10   7   0   -1.99    5.02  12
  11   7   0   66.64    8.35   9
 -11  -7   0   56.59    7.10  10
  11  -7   0   82.44    6.65   9
 -11   7   0   70.87    9.59  11
  11   7   0   64.64    8.71   8
  11  -7   0   87.60   12.50   1
 -12  -7   0    6.61    8.58  10
  12   7   0    8.49    7.19   9
 -12   7   0    7.43    7.38  11
  12   7   0    2.50  180.84   8
  13   7   0  132.83   10.38   9
 -13  -7   0  125.68    8.91  10
  13   7   0  152.15   10.87   8
 -13   7   0  145.06   12.57  11
  14   7   0   53.34    9.52   9
 -14  -7   0   48.57    8.20  10
 -14   7   0   24.44   11.94  11
  14   7   0   30.59    9.69   8
 -15   7   0   47.96   13.14  11
 -15  -7   0   38.77    8.61  10
  15   7   0   39.02    9.99   8
  15   7   0   34.44    9.06   9
 -16  -7   0   29.20    8.78  10
 -16   7   0   32.06   12.61  11
  16   7   0   50.21   10.52   9
  16   7   0   42.28    9.91   8
  17   7   0   11.47   14.79   8
 -17  -7   0    2.63   11.43  10
  17   7   0   13.39   15.14   9
 -18  -7   0   16.34    8.96  10
  18   7   0    2.88    6.20   9
  18   7   0   10.18   11.65   8
 -18   7   0    3.60   19.60  11
 -19  -7   0   13.17   12.07  10
   0  -8   0  603.77   16.89   6
   0   8   0  608.23   21.64   3
   0  -8   0  583.41   16.60   5
   0   8   0  616.23   19.03   9
   0   8   0  585.01   22.16  11
   0   8   0  579.13   26.41   7
   0   8   0  615.20   20.81   8
   1   8   0   79.74    4.57   8
  -1  -8   0   81.71    2.98   6
  -1   8   0   78.11    5.84   7
  -1   8   0   89.41    5.49   3
  -1   8   0   83.69    3.84   8
   1   8   0   77.72    6.43  11
  -1   8   0   86.02    6.18  11
   1   8   0   87.41    5.43   3
  -1   8   0   86.41    3.55   9
  -1   8   0   85.73    5.68  12
  -1  -8   0   78.17    5.41   2
   1   8   0   81.09    4.02   9
  -2   8   0  278.37    9.89   8
  -2  -8   0  276.93   10.50   2
  -2   8   0  296.29   11.75  12
   2   8   0  280.14    9.71   9
  -2   8   0  283.07   11.36   3
  -2   8   0  262.38   13.65   7
  -2   8   0  282.31   11.70  11
   2   8   0  285.18   10.91   3
   2  -8   0  265.92   10.95   4
   2   8   0  292.40   10.71   8
  -2  -8   0  282.76    8.17   6
  -3   8   0    0.94    2.60  12
  -3  -8   0   13.95    3.77   2
  -3  -8   0    1.10    5.35   6
  -3   8   0    2.26    3.68  11
   3   8   0    4.60    3.35   3
  -3   8   0   -0.88    1.79   7
   3   8   0    8.76    2.73   9
  -3   8   0   -1.66    1.40   3
   4   8   0   65.15    5.61   3
  -4   8   0   62.07    7.18  11
   4   8   0   69.61    4.54   9
  -4  -8   0   65.12    3.23   6
  -4   8   0   76.35    6.38   3
  -4   8   0   58.05    8.33   7
  -4   8   0   66.55    5.08  12
   4   8   0   64.23    5.22   8
   5   8   0    1.38   37.85   8
   5   8   0    5.51   23.99   3
  -5  -8   0   12.70    2.76   6
  -5   8   0    8.70    6.94  11
   5   8   0    3.35    4.44   9
  -6   8   0   89.49    7.46  11
   6  -8   0   83.45    9.25   1
   6   8   0   77.93    6.92   3
   6   8   0   80.80    5.91   9
  -6  -8   0   78.49    4.34   6
  -6   8   0   72.43   10.35   7
   6   8   0   75.43    6.78   8
  -7   8   0  371.65   15.93  11
   7  -8   0  379.72   19.83   1
  -7   8   0  365.01   19.96   7
   7   8   0  375.82   14.09   9
   7   8   0  354.90   15.53   3
   7   8   0  355.26   14.91   8
   8  -8   0   77.60   11.97   1
  -8   8   0   95.75    9.15  11
   8   8   0   88.37    8.32   8
  -8   8   0   68.15   13.03   7
   8   8   0   69.52   11.63   3
   8   8   0   69.29    7.87   9
   9   8   0  137.45    9.86   8
   9   8   0  153.23    9.50   9
   9  -8   0  168.34   13.59   1
  -9   8   0  125.21   14.50   7
  -9   8   0  139.87   11.02  11
   9   8   0  140.95   11.97   3
   9  -8   0  150.50    7.16   9
  -9  -8   0  140.84    8.35  10
   9   8   0  144.38    8.43  12
 -10   8   0   16.31   12.78  11
 -10  -8   0   11.62    5.76  10
  10   8   0   21.06    5.18  12
  10   8   0   26.81    7.28   9
  10  -8   0   33.70   11.20   1
  10   8   0   31.80    8.43   8
  11   8   0   62.42    8.64   8
 -11   8   0   67.29   10.77  11
 -11  -8   0   75.35    7.25  10
  11   8   0   67.81    8.22   9
  11  -8   0   74.46   13.14   1
 -12   8   0   21.68    9.65  11
  12   8   0   66.91    7.85   9
 -12  -8   0   53.47    7.08  10
  12  -8   0   57.33   12.16   1
  12   8   0   45.23    8.46   8
 -13   8   0   13.27    8.49  11
  13   8   0   17.80    8.77   9
 -13  -8   0    6.25    5.02  10
  13   8   0   -0.97    3.31   8
  14   8   0    9.88    7.31   9
 -14  -8   0   18.77    7.81  10
 -14   8   0   23.09   11.21  11
  14   8   0   18.19    8.91   8
  15   8   0   86.19   11.38   9
  15   8   0   94.54   11.78   8
 -15   8   0   95.05   12.77  11
 -15  -8   0   84.43    9.87  10
 -16   8   0   14.25   15.07  11
  16   8   0    0.92    3.80   9
  16   8   0    1.66    6.57   8
 -16  -8   0   11.58    9.07  10
  17   8   0   46.06   11.90   8
 -17  -8   0   27.55    8.99  10
 -17   8   0   35.53   14.49  11
  17   8   0   39.43   10.44   9
 -18  -8   0    2.99    8.54  10
  18   8   0    2.25   33.31   8
   0   9   0   -0.33   11.07   9
   0   9   0    2.25    4.30  11
   0   9   0    1.97   24.63  12
   1   9   0  225.94    9.57   3
  -1   9   0  227.80    8.45   8
  -1   9   0  232.80   10.65  11
  -1   9   0  233.63    7.71   9
   1   9   0  238.06    8.07   9
   1   9   0  214.68   10.29  11
  -1   9   0  211.04   11.21   7
  -1   9   0  230.83    9.73   3
   1   9   0  235.16    8.91   8
  -1   9   0  234.92   10.33  12
  -1  -9   0  228.87    9.17   2
  -1  -9   0  223.57    6.74   6
  -2   9   0    9.92    4.95  12
   2  -9   0    9.06    1.91   4
  -2   9   0    9.27   10.88   3
  -2   9   0    7.13    2.18   9
   2   9   0    7.64    4.13   9
  -2   9   0   10.96    5.01  11
   2   9   0    5.98    5.11   8
   2   9   0   11.99    4.72   3
  -2  -9   0    9.85    4.08   2
  -2   9   0    7.26    2.91   8
  -2   9   0    3.96   18.35   7
  -2  -9   0    8.88    2.05   6
  -3  -9   0  156.03    7.41   2
  -3   9   0  142.05    8.20   3
  -3   9   0  152.85    8.54  11
  -3   9   0  146.22    7.78  12
  -3   9   0  130.92    9.73   7
  -3  -9   0  157.61    4.93   6
   3   9   0  152.80    7.27   8
   3   9   0  148.30    6.43   9
   3   9   0  149.63    7.29   3
  -4   9   0  135.96    8.61  11
  -4  -9   0  139.26    4.79   6
  -4   9   0  133.77    8.36   3
  -4   9   0  123.78    9.68   7
  -4   9   0  133.62    7.15  12
   4   9   0  138.32    7.07   3
   4   9   0  135.90    6.26   9
   4   9   0  141.46    7.20   8
  -5   9   0   23.73   10.28  11
  -5  -9   0   41.18    3.34   6
   5  -9   0   18.54   11.96   1
   5   9   0   29.01    6.74   8
   5   9   0   43.68    5.15   3
  -5   9   0   38.49    5.36  12
  -5   9   0   32.53   17.69   7
   5   9   0   45.06    4.84   9
  -6   9   0    0.05    0.16  11
   6  -9   0    0.24    2.91   1
  -6  -9   0   13.46    3.18   6
  -6   9   0   -1.93    2.06  12
   6   9   0   -0.80    3.49   8
   6   9   0    5.54    3.92   9
  -7   9   0    6.81    4.91  11
   7   9   0   13.47    4.13   9
   7  -9   0    6.23   15.16   1
   7   9   0    1.67    2.26   8
  -7   9   0    4.72    6.63   7
   7   9   0   10.73    7.01   3
   8   9   0   17.22    9.18   8
   8  -9   0   42.10   10.79   1
  -8   9   0   27.67    8.73  11
   8   9   0   58.75    7.52   9
  -8   9   0   86.07   15.11   7
   8   9   0   31.00    8.20   3
   9   9   0   15.02    9.43   3
  -9   9   0    9.25   11.12   7
   9   9   0   25.78    8.13   9
   9  -9   0   32.50   11.81   1
   9   9   0   23.40    8.02   8
   9   9   0   19.55    5.96  12
  -9   9   0   10.65   10.96  11
  -9  -9   0   22.62    6.92  10
  10   9   0   49.38    7.17   9
  10  -9   0   73.95   11.22   1
  10   9   0   45.37    8.46   8
  10   9   0   62.12    6.63  12
 -10  -9   0   67.12    7.09  10
 -10   9   0   59.46    9.19  11
  11  -9   0   91.31   13.06   1
 -11  -9   0   70.60    7.53  10
 -11   9   0   76.86   10.70  11
  11   9   0   82.31    8.89   8
  11   9   0   93.53    8.41   9
  12   9   0   33.37    8.24   8
  12   9   0   36.43    7.47   9
  12  -9   0   42.55   13.85   1
 -12  -9   0   30.92    7.71  10
 -12   9   0   49.26   11.07  11
 -13   9   0   62.17   10.82  11
  13   9   0   76.94    9.23   9
  13   9   0   67.14   10.15   8
 -13  -9   0   56.84    8.27  10
 -14  -9   0   28.08    8.17  10
  14   9   0   11.74    9.60   8
 -14   9   0   16.26   12.30  11
  14   9   0   29.25   10.55   9
 -15  -9   0   19.35    8.16  10
 -15   9   0   37.94   10.91  11
  15   9   0   18.35   13.91   9
  15   9   0   18.64    9.20   8
 -16  -9   0   37.65   10.01  10
  16   9   0   45.47   12.38   8
 -16   9   0   66.12   13.20  11
  16   9   0   58.34   11.38   9
  17   9   0    4.72    7.71   8
  17   9   0   14.22    9.83   9
 -17  -9   0   16.08   10.05  10
  18   9   0    8.63    8.61   8
 -18  -9   0    4.90   13.00  10
   0  10   0   15.58    2.72   9
   0  10   0   17.66    3.02   8
   0  10   0    6.46    5.36   7
   0  10   0    2.27   26.94  11
   0 -10   0    7.66    1.91   5
   0  10   0   11.78    5.16  12
   0 -10   0   13.89    2.16   6
  -1  10   0   12.97    5.05  12
  -1 -10   0   16.06    1.93   6
   1  10   0   18.26    5.79  12
  -1  10   0   14.24    2.91   9
   1  10   0   10.54    4.55   9
   1  10   0   11.87    9.12   3
  -1  10   0   13.90    6.54   3
  -1 -10   0   15.68    4.90   2
   1  10   0   18.91    4.62  11
   1 -10   0   16.94    2.32   6
   1  10   0    6.41    5.99   8
  -1  10   0    8.86    3.53   8
  -1  10   0   13.03    8.91  11
   2 -10   0   17.75    1.82   4
  -2  10   0   15.84    2.42   9
   2  10   0   16.42    7.11   3
  -2 -10   0   25.48    5.07   2
   2  10   0   13.27    4.06   8
  -2  10   0   12.51    6.53   3
  -2  10   0   17.83    4.95  11
  -2 -10   0   13.39    2.35   6
  -2  10   0   10.08    2.85   8
  -2  10   0   12.04    5.71  12
   2  10   0   16.93    3.98   9
  -3  10   0    8.69    5.17  12
   3  10   0   10.02    3.93   9
  -3  10   0   12.88    5.34  11
  -3 -10   0    7.31    4.46   2
   3  10   0    9.80   14.58   3
  -3 -10   0   10.01    2.73   6
   3  10   0    3.73    6.48   8
  -3  10   0    7.85   29.11   3
  -4  10   0   63.91    7.84  11
  -4 -10   0   62.71    6.60   2
   4  10   0   64.09    6.47   3
   4  10   0   53.78    5.91   8
  -4  10   0   54.57    8.31   3
  -4  10   0   50.91    6.02  12
  -4 -10   0   68.17    3.41   6
  -4  10   0   42.50   12.28   7
   4  10   0   56.98    5.35   9
   5  10   0   23.49    5.31   9
  -5  10   0   26.45    8.25  11
  -5  10   0   12.08   17.94   3
   5 -10   0    9.74   14.35   1
   5  10   0   23.08    6.89   3
  -5  10   0   18.90    6.46  12
   5  10   0   11.13    9.96   8
  -5  10   0    7.97  114.09   7
  -5 -10   0   22.01    3.45   6
   6  10   0   45.84    6.93   3
  -6  10   0   24.78    9.85  11
   6  10   0   38.66    6.49   8
   6 -10   0   32.73    9.98   1
  -6  10   0   20.20   11.79   7
  -6  10   0   32.99    5.43  12
   6  10   0   45.47    5.84   9
  -7  10   0   71.06   16.02   7
   7  10   0    4.07    8.10   3
  -7  10   0    6.46   16.92  11
   7  10   0    7.43    3.18   9
   7 -10   0    6.15   13.48   1
   7  10   0   -1.17    2.67   8
   8  10   0    1.68    4.01   9
   8 -10   0    0.41    4.65   1
   8  10   0   -1.46    1.74   8
   8  10   0    0.22    0.81   3
   8  10   0    4.88    4.58  12
  -8  10   0    2.92   13.96  11
  -9 -10   0   21.24    6.01  10
   9  10   0   19.68    9.01   8
   9  10   0   29.72    8.04   9
  -9  10   0    4.59    6.80  11
   9  10   0    2.49   10.31  12
   9 -10   0    5.34    8.08   1
  10  10   0   33.75    6.61  12
  10  10   0   29.35    8.03   8
 -10 -10   0   26.42    7.04  10
 -10  10   0   22.26    9.70  11
  10  10   0   28.07    7.59   9
  10 -10   0   45.96   11.83   1
  11  10   0    5.53    4.82   8
 -11  10   0    0.50    2.22  11
  11 -10   0   34.21   11.97   1
  11  10   0    8.31    6.34   9
 -11 -10   0    6.32    7.80  10
 -12  10   0  122.48   11.74  11
  12  10   0  122.10    9.79   9
  12  10   0  125.46   10.72   8
  12 -10   0  140.58   15.77   1
 -12 -10   0  120.63    9.11  10
  13  10   0    2.21    7.98   8
 -13 -10   0    3.12    8.64  10
  13  10   0   14.28    8.33   9
 -13  10   0    3.47    7.46  11
  14  10   0   53.33   10.63   8
  14  10   0   40.28   10.54   9
 -14 -10   0   52.55    9.33  10
 -14  10   0   56.92   11.82  11
 -15 -10   0   20.73    8.65  10
  15  10   0   24.80    8.38   9
  15  10   0   23.58   10.64   8
 -15  10   0    6.21    9.07  11
  16  10   0    4.19   26.17   8
 -16  10   0    8.10   14.21  11
 -16 -10   0   -2.12   18.35  10
  16  10   0   18.96   11.50   9
 -17 -10   0   27.03    9.46  10
  17  10   0   18.18   12.36   8
  17  10   0   22.47   11.22   9
 -17  10   0   12.67   12.66  11
 -18 -10   0   11.42   10.07  10
   0 -11   0    0.24    0.99   6
   0  11   0   -1.73   12.86  11
  -1 -11   0    2.21    1.44   6
  -1  11   0    1.42    2.14   3
   1 -11   0    4.42    3.06   6
   1  11   0   -1.42    1.24   8
   1  11   0    3.93    7.33  11
  -1  11   0   -0.37    0.87   9
  -1 -11   0   -1.27    1.48   2
  -1  11   0    3.93    3.18   8
   1  11   0    7.69    7.35  12
  -1  11   0    2.13   12.31  12
  -2  11   0   -0.17    0.40   9
   2  11   0    2.08    6.46   3
  -2 -11   0    1.37    4.18   6
  -2  11   0    0.41    2.74   3
   2  11   0    2.67    3.34  12
  -2 -11   0    6.94    5.07   2
  -3 -11   0   10.89    5.97   2
  -3  11   0    4.49   13.07  12
   3  11   0    8.87   11.17   3
  -3 -11   0   11.36    2.76   6
  -3  11   0   21.50    6.45  11
  -4  11   0   19.90    5.60  12
  -4  11   0   25.92    8.87  11
   4  11   0   26.28    8.34   3
  -4  11   0   18.19   14.38   7
  -4  11   0   23.13    9.39   3
  -4 -11   0   26.70    3.21   6
   4  11   0   16.83    7.38   8
   4  11   0   19.64    5.48   9
  -4 -11   0   23.66    6.56   2
  -5  11   0  146.05    9.99   3
  -5  11   0  127.48   12.41   7
  -5  11   0  141.89   10.43  11
   5  11   0  137.72    7.41   9
  -5 -11   0  148.03    5.48   6
   5  11   0  149.66    8.65   3
   5  11   0  114.44    8.46   8
  -5  11   0  134.27    8.31  12
   5 -11   0  136.74   12.09   1
   6  11   0    9.45    4.45   9
   6  11   0    2.19    5.64  12
   6  11   0    5.12    6.30   3
  -6  11   0    9.93   32.49   7
   6  11   0   -2.49    4.21   8
  -7  11   0    3.24   25.52  11
   7  11   0   15.05    6.43  12
  -7  11   0    3.92   24.73   7
   7 -11   0    8.67   18.49   1
   7  11   0    1.02    7.04   8
   7  11   0   10.94    5.93   9
   7  11   0    8.17    8.90   3
  -8 -11   0   61.17    6.67  10
  -8  11   0   80.39   13.15   7
   8 -11   0   63.54   10.71   1
   8  11   0   69.49    7.07   9
   8  11   0   61.59    8.18   8
  -8  11   0   60.51    9.16  11
   8  11   0   57.92    7.59  12
  -9 -11   0   11.81    6.57  10
   9 -11   0    8.68    9.60   1
   9  11   0   18.26    7.11   8
   9  11   0   16.44    8.61   9
   9  11   0    5.99    7.07  12
  -9  11   0    5.79   18.42  11
  10  11   0   15.19    8.26  12
  10  11   0   31.22    7.49   9
 -10  11   0   29.36    8.58  11
  10 -11   0   39.68   11.65   1
 -10 -11   0   28.17    7.12  10
  10  11   0   33.10    8.75   8
 -11 -11   0   44.53    8.20  10
  11  11   0   37.52    7.40   9
  11  11   0   45.32    8.85   8
  11 -11   0   49.99   12.74   1
 -11  11   0   26.23    9.57  11
  12  11   0    0.32    1.87   8
 -12  11   0   10.28    9.01  11
  12 -11   0   -2.25    6.50   1
  12  11   0    3.99    7.51   9
  13  11   0   35.39    8.38   9
 -13 -11   0   48.72    8.53  10
  13 -11   0   54.51   15.34   1
  13  11   0   17.41   13.13   8
 -13  11   0   33.75   11.36  11
 -14  11   0   23.09   12.67  11
  14  11   0    9.89   14.79   8
  14  11   0   26.79    9.90   9
 -14 -11   0   33.51    9.21  10
 -15  11   0    5.11   13.31  11
  15  11   0   13.80    8.21   9
 -15 -11   0    7.89    9.02  10
  15  11   0    7.40   14.40   8
  16  11   0   35.38   13.30   8
 -16  11   0   39.62   13.76  11
 -16 -11   0   36.11   10.80  10
  16  11   0   40.54   12.07   9
  17  11   0    6.45   10.53   8
  17  11   0   17.10   15.90   9
 -17 -11   0    2.80   18.20  10
   0  12   0  186.91    9.77  12
   0  12   0  180.19    9.28   3
   0 -12   0  169.59    5.64   6
   0  12   0  169.40    7.44   8
   0  12   0  190.42   10.30  11
   0  12   0  178.13    6.77   9
   0 -12   0  159.71    5.26   5
  -1 -12   0   21.22    8.23   2
  -1 -12   0   19.74    2.17   6
   1  12   0   22.42   11.33  11
  -1  12   0   14.27    8.52  12
  -1  12   0   20.56    3.09   9
   1 -12   0   16.22    3.42   6
   1  12   0   14.56   13.41   3
   1  12   0   19.03    6.60  12
   1  12   0   17.26    4.25   8
  -1  12   0    6.46   20.20  11
  -1  12   0    4.54    5.37   8
   1 -12   0    6.55    4.39   5
   1  12   0   12.33    3.79   9
  -1  12   0   18.83    7.77   3
  -2 -12   0    1.31    2.96   6
  -2  12   0   -0.79    1.74   3
   2  12   0    4.67    6.51   8
  -2  12   0    3.70    2.72   9
  -2  12   0   -1.66    1.00  11
   2  12   0    6.45    6.54  12
   2  12   0    2.24   15.31   3
  -2  12   0   -1.63    1.25   8
  -2 -12   0    5.91    6.57   2
  -2  12   0    1.31    2.52  12
  -3  12   0    2.50  151.00   3
   3  12   0    5.23    5.18   8
  -3  12   0   14.31    5.48  11
  -3 -12   0   14.10    5.05   2
   3  12   0   10.91    4.67   9
  -3 -12   0    4.55    5.71   6
   3  12   0   14.60    7.16  12
   3  12   0   10.69    5.02   3
  -3  12   0    7.18    6.11  12
  -4  12   0   29.68    7.36  11
   4  12   0   27.59    7.06  12
  -4  12   0   27.37   21.06   7
  -4  12   0   16.16    9.53   3
  -4 -12   0   34.62    6.23   2
   4  12   0    9.72    6.32   8
   4  12   0   21.48    6.66   3
  -4 -12   0   18.28    3.37   6
  -4  12   0    5.59    9.36  12
   4  12   0   18.98    6.58   9
  -5  12   0    8.65    6.76  11
  -5 -12   0    2.61   11.52   6
   6  12   0    3.69    8.51   3
   6  12   0    6.00    5.18  12
   6 -12   0   -1.04    2.42   1
   6  12   0   -2.50    2.45   8
  -6  12   0    2.71   16.02  11
  -6  12   0   25.97    9.49   7
   6  12   0    0.68    1.81   9
  -7  12   0   91.60   12.42   7
   7  12   0   66.46    8.66   8
  -7  12   0   77.84   10.16  11
   7  12   0   80.56    8.50  12
   7  12   0   91.06    7.54   9
   7 -12   0   82.31   11.73   1
  -8 -12   0   -2.24    4.88  10
   8 -12   0    2.64   86.38   1
   8  12   0    5.65    5.16  12
  -8  12   0   -1.97   28.12  11
   8  12   0    2.14    4.78   9
   9 -12   0   84.58   12.71   1
   9  12   0   91.55    9.28   8
  -9 -12   0   97.38    8.01  10
   9  12   0   90.74    8.37  12
  -9  12   0   59.58   10.63  11
   9  12   0   92.01    8.76   9
 -10  12   0   -2.21    7.20  11
  10  12   0   19.46    8.34   9
  10  12   0    9.08    5.10  12
  10  12   0   24.83    7.46   8
  10 -12   0    8.06    9.55   1
 -10 -12   0   10.34    7.40  10
 -11  12   0   15.30   13.84  11
  11  12   0   35.64    8.44   9
  11 -12   0   35.28   12.24   1
  11  12   0   18.20    9.29   8
 -11 -12   0   38.25    7.61  10
  12  12   0   30.00    8.35   8
  12  12   0   35.05    8.31   9
 -12  12   0    8.17    7.33  11
  12 -12   0   29.50   13.64   1
 -12 -12   0   41.62    8.79  10
 -13 -12   0    8.31    8.09  10
 -13  12   0    6.35    8.98  11
  13 -12   0   19.84   13.71   1
  14  12   0   15.48    9.71   9
  14  12   0   28.73   13.12   8
 -14  12   0    9.47   10.85  11
 -14 -12   0   11.00   10.17  10
 -15  12   0   59.44   13.06  11
  15  12   0   49.44   11.90   9
  15  12   0   55.66   10.70   8
 -15 -12   0   44.60   10.03  10
  16  12   0   14.76   12.46   8
 -16 -12   0    9.70    8.12  10
  16  12   0   11.99   10.49   9
 -17 -12   0   38.07   10.81  10
  17  12   0   41.26   11.86   8
   0  13   0    1.87   13.71  12
   0  13   0    3.68   14.20  11
   0  13   0    7.08    4.55   3
   1  13   0  144.58    6.98   8
  -1  13   0  124.72    6.47   8
  -1  13   0  140.57    5.73   9
  -1  13   0  150.31    8.95   3
   1  13   0  156.23    9.74  11
  -1  13   0  151.59    9.24  12
  -1  13   0  146.96   10.64  11
  -1 -13   0  153.70    9.08   2
   1  13   0  150.68    8.88   3
   1 -13   0  125.84    5.38   6
   1 -13   0  130.19    5.12   5
   1  13   0  141.15    9.50  12
   1  13   0  139.91    6.28   9
   2  13   0   80.58    5.18   9
  -2  13   0   69.60    7.24  12
  -2  13   0   65.86   12.01  11
   2  13   0   79.62    8.62  12
  -2  13   0   67.91    8.34   3
   2  13   0   83.61    7.26   3
   2 -13   0   68.08    4.78  10
   2 -13   0   78.25    4.00   6
  -2 -13   0   76.25    8.49   2
   2  13   0   71.62    6.05   8
   3  13   0    4.62    9.12   3
  -3 -13   0   11.42    5.49   2
  -3  13   0    6.97    5.24  11
  -4  13   0  107.07   11.41   7
  -4  13   0  100.43    8.51  12
  -4  13   0  122.55    9.61   3
  -4  13   0  106.67    9.74  11
   4  13   0  108.82    7.87   8
   4  13   0  122.86    7.82   3
   4  13   0  107.70    9.70  12
   4  13   0   96.85    7.09   9
  -4 -13   0  121.76    8.92   2
  -5  13   0   32.70    9.01   3
   5 -13   0   35.13   11.26   1
   5  13   0   35.19    8.77  12
   5  13   0   36.54    6.57   9
  -5  13   0   66.41   10.75   7
  -5  13   0   34.48   10.18  11
   5  13   0   41.58    7.21   3
   5  13   0   30.85    6.96   8
  -5  13   0   22.22    6.91  12
  -6  13   0   22.37    6.72  12
   6  13   0   29.22    7.44  12
   6 -13   0   34.87   10.89   1
   6  13   0   24.33    7.56   8
   6  13   0   18.82    7.54   9
  -6  13   0   23.77    8.25  11
  -6  13   0   58.19   11.26   7
  -7 -13   0   25.30    6.99  10
   7  13   0   29.29    8.75   8
   7 -13   0   21.35    9.82   1
   7  13   0   27.07    6.15   9
   7  13   0   30.67    7.79  12
  -7  13   0   36.64    9.32  11
   8 -13   0   34.05   11.52   1
  -8  13   0   36.46   11.18  11
   8  13   0   39.73    8.90   8
   8  13   0   32.72    6.96   9
  -8 -13   0   44.03    7.42  10
   8  13   0   33.71    8.00  12
   9  13   0   15.89    9.12   9
   9 -13   0   14.42   11.80   1
   9  13   0   -1.51    3.13   8
  -9 -13   0    1.70   44.18  10
   9  13   0   10.31   10.90  12
  -9  13   0    4.93    5.87  11
  10  13   0   41.72    8.59   8
 -10  13   0   45.18   11.36  11
  10  13   0   56.37    8.15  12
 -10 -13   0   48.25    8.14  10
  10  13   0   47.34    8.33   9
  10 -13   0   52.82   13.20   1
 -11  13   0   37.40   10.42  11
  11 -13   0   46.63   13.62   1
 -11 -13   0   51.36    8.00  10
  11  13   0   42.30    9.76   8
  11  13   0   56.77    9.06   9
  12  13   0    7.96    8.15   9
  12 -13   0   17.90   14.08   1
 -12 -13   0    7.41    5.71  10
  13  13   0   50.46   10.33   8
  13  13   0   69.43   10.75   9
  13 -13   0   49.07   16.05   1
 -13  13   0   30.88   13.26  11
 -13 -13   0   38.51    9.78  10
  14  13   0   15.78   11.57   8
 -14  13   0   11.77   13.96  11
  14  13   0   15.20   10.20   9
 -14 -13   0   20.22   10.01  10
 -15  13   0   28.65   16.23  11
 -15 -13   0   17.78    9.96  10
  15  13   0   19.37   10.65   8
  15  13   0   10.18   11.59   9
  16  13   0   18.40   11.65   8
 -16 -13   0   34.69   10.67  10
 -16  13   0   43.15   14.92  11
  16  13   0   49.55   11.50   9
 -17 -13   0    5.71    9.77  10
   0  14   0    6.90    8.56  11
   0  14   0    5.74   10.46   3
   0  14   0   -1.81    2.73   9
   1  14   0    3.78   10.69   8
  -1  14   0    5.15    7.47   3
  -1 -14   0   -1.02   95.83   2
   1  14   0   11.37    5.94  11
   1  14   0    6.20   34.23   3
   1  14   0    6.48   25.91  12
   1  14   0    2.96    4.73   9
  -1  14   0    1.33    6.83  12
  -1  14   0   14.45    7.95  11
  -2 -14   0    9.80    6.15   2
   2  14   0    4.07    9.14  12
  -2  14   0    0.94    3.66   3
   2  14   0   12.46    6.65   8
   2  14   0    4.99   13.71   3
  -3  14   0   -0.97    2.60   3
  -3 -14   0    7.25    6.69   2
   3  14   0   -0.78    2.30   8
   3  14   0    3.66    4.46   3
   3  14   0    4.31   10.80  12
   4  14   0   35.31    7.21  12
  -4 -14   0   43.40    7.95   2
  -4  14   0   36.19    8.80   3
   4  14   0   37.08    6.90   8
  -4  14   0   20.13    8.01  12
  -4  14   0   45.13    8.52  11
   4  14   0   45.03    5.80   9
   4  14   0   41.48    6.45   3
   5 -14   0   45.60   11.84   1
  -5  14   0   54.54    8.62  11
  -5  14   0   40.78    9.10   3
   5  14   0   45.97    6.31   9
   5  14   0   40.78    7.25   8
   5  14   0   43.66    7.72  12
  -5  14   0   40.24    6.97  12
  -6  14   0   54.24    8.91  11
   6  14   0   44.00    7.97  12
   6 -14   0   49.05   10.42   1
  -6 -14   0   39.33    6.45  10
  -6  14   0   40.94    7.12  12
   6  14   0   37.50    7.06   8
   6  14   0   54.08    6.70   9
   7  14   0   15.01    6.46   8
  -7 -14   0   19.97    6.99  10
   7  14   0    9.33    8.13  12
  -7  14   0   15.67    8.79  11
   7  14   0   36.66    7.63   9
   7 -14   0   11.22   13.28   1
   8  14   0    6.54    6.74  12
  -8 -14   0   -0.25    1.37  10
   9  14   0   27.33    7.19   8
  -9 -14   0   14.08    8.82  10
   9 -14   0    9.53   14.09   1
   9  14   0   13.50    9.34  12
  -9  14   0   11.33   11.17  11
   9  14   0   24.52    8.38   9
  10  14   0   58.07    8.85  12
 -10  14   0   52.05   11.49  11
 -10 -14   0   40.80    7.80  10
  10 -14   0   59.03   12.69   1
  10  14   0   49.79    9.58   9
  10  14   0   45.40    8.94   8
  11  14   0   13.31    8.18   9
  11 -14   0   26.80   15.00   1
  12  14   0   78.25   10.81   8
 -12 -14   0   81.33    9.99  10
  12 -14   0  109.92   16.03   1
  12  14   0   80.09   10.88   9
 -12  14   0   65.49   13.41  11
 -13  14   0   34.87   11.71  11
  13 -14   0   54.95   15.53   1
  13  14   0   27.04    9.86   9
  13  14   0   13.47   14.11   8
 -13 -14   0   23.71    9.12  10
  14  14   0   74.21   11.26   9
 -14  14   0   61.09   15.03  11
 -14 -14   0   67.10   10.61  10
  14  14   0   67.51   11.22   8
 -15 -14   0   27.32   11.48  10
  15  14   0   27.12   12.07   9
 -15  14   0   10.79   16.51  11
  15  14   0   37.76   10.26   8
 -16 -14   0   13.10    9.63  10
  16  14   0   14.56   11.86   8
  16  14   0   17.65   12.31   9
 -16  14   0    8.84   13.26  11
   0  15   0    0.30    0.82   3
   0 -15   0   -1.16    4.21   2
   0  15   0   11.24    6.61  11
   1  15   0   24.46    7.44  12
  -1  15   0   25.58    7.65  12
   1  15   0   33.98    7.03   3
   1  15   0   30.84    4.16   9
  -1 -15   0   33.89    7.82   2
   1 -15   0   26.02    4.70  10
  -1  15   0   14.41    4.62   8
   1  15   0   41.14    8.50  11
  -1  15   0   32.81    8.47   3
  -1  15   0   27.08    7.72  11
   1  15   0   30.62    5.04   8
   2  15   0   27.83    4.47   9
  -2  15   0   20.58    6.69   3
   2  15   0   18.51    9.20   3
  -2  15   0   15.43    7.60  12
  -2  15   0   14.36    8.74  11
  -2 -15   0   33.91    8.05   2
   2  15   0   25.08    5.29   8
   2  15   0   13.26    7.93  12
  -3  15   0   12.95   10.20  11
   3  15   0   20.31    6.22   8
   3  15   0   16.22    9.54  12
   3  15   0   25.98    7.68   3
  -3  15   0   19.57    9.36   3
  -3  15   0    8.24    8.10  12
  -3 -15   0   42.08    7.16   2
   3  15   0   26.14    4.89   9
  -4 -15   0   70.85    8.16   2
   4  15   0   51.59    6.78   8
  -4  15   0   56.54    9.06  11
   4  15   0   48.41    5.73   9
  -4  15   0   74.08    8.97   3
  -4  15   0   44.00    7.36  12
   4  15   0   45.19    8.56  12
   5  15   0   32.90    7.60   8
  -5 -15   0   27.57    6.28  10
  -5  15   0   40.87    7.96  11
   5 -15   0   16.39   10.47   1
  -5  15   0   18.12    7.77  12
   5  15   0   15.67    8.25  12
   5  15   0   24.51    5.94   9
   6  15   0   15.91    6.61   9
  -6  15   0   24.98    8.73  11
   6 -15   0    6.29   18.27   1
  -6 -15   0   15.78    6.23  10
   7  15   0   18.55    8.81  12
   7 -15   0    7.77   11.33   1
  -7 -15   0    9.37    6.44  10
   7  15   0    9.17   11.78   8
   7  15   0   13.51    7.60   9
  -7  15   0   20.37   10.00  11
  -8  15   0   11.96    9.61  11
   8  15   0   22.89    8.74   9
   8 -15   0   10.74   12.15   1
   8  15   0    3.92  165.91  12
   8  15   0   27.16    9.82   8
  -8 -15   0   38.08    7.58  10
  -9 -15   0   84.91    8.65  10
   9 -15   0   75.87   13.41   1
   9  15   0   73.89    9.16   9
   9  15   0   70.48    9.70  12
   9  15   0   81.13    9.84   8
  -9  15   0   84.34   11.47  11
  10  15   0   52.58    9.25   9
  10  15   0   55.05    9.05  12
  10  15   0   52.29    9.11   8
 -10  15   0   49.44   10.98  11
  10 -15   0   75.37   13.50   1
 -10 -15   0   64.40    8.89  10
 -11  15   0   67.85   12.27  11
  11 -15   0   63.52   15.58   1
  11  15   0   69.74   10.68   9
 -11 -15   0   48.16    9.17  10
  11  15   0   51.54    9.96   8
  12  15   0   14.28    9.28   8
 -12 -15   0   21.25    9.71  10
  12 -15   0   42.54   14.20   1
 -12  15   0   28.08   10.99  11
  12  15   0   18.59   10.87   9
  13  15   0   11.97   15.47   8
 -13  15   0   28.54   12.92  11
 -13 -15   0   17.02    9.79  10
  13 -15   0   42.90   16.48   1
  13  15   0    6.61    8.60   9
 -14 -15   0   19.46   10.14  10
 -14  15   0   19.26   14.02  11
  14  15   0   25.53   11.11   9
  14  15   0   20.50    9.79   8
 -15  15   0    7.71   14.43  11
  15  15   0   -0.83   25.04   8
 -15 -15   0   10.83    9.26  10
 -16 -15   0    7.50   11.14  10
   0 -16   0  268.87   10.35  10
   0  16   0  264.51   13.96  12
   0 -16   0  296.10   12.79   2
   0  16   0  244.16   10.93   8
   0  16   0  289.85   12.71   3
   0  16   0  286.41   14.20  11
  -1  16   0   10.58    6.25   3
  -1  16   0    1.55   22.68  12
   1  16   0   13.41    7.83   3
  -1 -16   0    6.70    7.98   2
   1  16   0    3.48    5.60   8
   1  16   0   12.60    6.51  11
  -1  16   0   10.06    5.80  11
  -1 -16   0    0.40   15.79  10
  -2 -16   0   99.91    6.64  10
  -2  16   0   91.43    8.80   3
   2  16   0   82.55    5.62   9
  -2  16   0   82.42   10.09  11
  -2 -16   0   94.97    8.55   2
   2  16   0   70.84    9.71  12
  -2  16   0   72.16    8.96  12
   2  16   0  100.34    7.99   3
   2  16   0   74.40    6.65   8
   3  16   0    8.28    5.17   8
   3  16   0    4.42  337.46  12
  -3  16   0    3.79   28.53  11
  -3 -16   0    3.21   11.38  10
   3  16   0   10.39    4.62   9
  -3  16   0   -0.34    2.60   3
  -3 -16   0   23.32    8.09   2
   4  16   0    0.11    2.32   8
  -4 -16   0    2.69    5.41  10
   4  16   0    3.47    8.35   9
  -4 -16   0    8.78    6.00   2
  -4  16   0    0.24    1.11  11
   5 -16   0    1.98   18.21   1
  -5 -16   0   16.64    7.18  10
  -5  16   0    2.37    5.85  12
  -5  16   0   10.33   15.33  11
   5  16   0    5.65    6.53   9
   6  16   0   64.36    7.52   9
   6  16   0   75.13    7.96   8
  -6  16   0   80.95   10.21  11
   6 -16   0   60.82   12.05   1
   6  16   0   58.82    8.57  12
  -6 -16   0   80.83    7.91  10
  -6  16   0   55.95    7.95  12
   7  16   0   56.63    8.74   8
   7  16   0   66.55    9.82  12
   7 -16   0   51.10   13.17   1
  -7 -16   0   60.80    7.94  10
   7  16   0   52.68    7.83   9
  -7  16   0   60.15   10.00  11
   8  16   0   52.93   10.00  12
   8 -16   0   55.06   13.33   1
  -8  16   0   45.03   10.91  11
   8  16   0   45.12    8.83   8
   8  16   0   48.69    7.94   9
  -8 -16   0   59.70    8.16  10
   9  16   0   69.87    8.52   9
   9  16   0   51.58    9.22   8
  -9  16   0   61.39   11.40  11
   9 -16   0   73.95   14.18   1
  -9 -16   0   67.11    8.72  10
   9  16   0   64.15    9.90  12
  10  16   0   24.24   10.26  12
  10 -16   0   18.80   14.48   1
  10  16   0   30.33    9.80   9
 -10 -16   0   33.18    8.84  10
  10  16   0   19.15    8.56   8
 -10  16   0   13.55   11.34  11
  11 -16   0   17.47   14.60   1
 -11 -16   0   15.90    8.73  10
 -11  16   0    5.79   30.46  11
  11  16   0   13.59    8.97   8
 -12 -16   0   40.68    9.54  10
 -12  16   0   12.30   10.46  11
  12  16   0   27.22   10.31   8
  12  16   0   38.27   10.59   9
  12 -16   0   44.41   15.36   1
 -13  16   0    8.47   10.05  11
 -13 -16   0   15.69    9.90  10
  13 -16   0   28.24   17.93   1
  13  16   0   33.74   10.77   8
  13  16   0   18.02   11.85   9
  14  16   0   11.64   12.29   9
 -14 -16   0   28.54   11.52  10
  14  16   0   33.48   10.42   8
 -14  16   0    7.74   21.31  11
  15  16   0   21.83   12.77   9
 -15 -16   0    9.23   12.73  10
   0  17   0    2.61    3.32  11
   0  17   0    5.60    6.31   3
  -1 -17   0   26.27    8.63   2
   1  17   0   20.72    8.21  12
  -1  17   0   28.85    8.55   3
  -1  17   0   25.24    8.54  12
  -1  17   0   26.50   12.47  11
  -1 -17   0   22.02    5.83  10
   1  17   0   40.78    9.77  11
   1  17   0   30.93    7.14   3
   1  17   0   22.57    5.48   8
  -2  17   0   39.78    9.07   3
  -2 -17   0   28.27    5.74  10
   2  17   0   21.91    5.98   8
   2  17   0   29.48    9.31  12
  -2  17   0   14.86    8.58  12
   2  17   0   29.95    7.05   3
  -2 -17   0   52.46    7.86   2
  -2  17   0   22.97    9.73  11
   3  17   0    1.75    3.81   9
  -3 -17   0    1.68    9.03  10
  -3  17   0    0.41    2.94   3
  -3  17   0   -0.77    0.98  11
  -3 -17   0   11.67    7.74   2
  -4  17   0   29.51   14.40  11
  -4 -17   0   44.45    7.08  10
   4  17   0   36.04    7.03   8
  -4 -17   0   63.75    9.19   2
  -4  17   0   30.24    8.40  12
   4  17   0   45.93    5.86   9
   4  17   0   32.38    9.11  12
  -4  17   0   40.83   10.33   3
  -5 -17   0   51.25    7.26  10
   5  17   0   41.47    7.58   8
  -5  17   0   34.66    8.99  12
  -5  17   0   34.95   10.37  11
   5  17   0   40.48    6.60   9
   5 -17   0   54.43   11.22   1
   5  17   0   35.55    9.28  12
  -6 -17   0   71.32    7.96  10
   6  17   0   34.85    8.39   8
  -6  17   0   59.02   10.50  11
   6 -17   0   58.14   12.24   1
   6  17   0   40.53    7.25   9
  -6  17   0   29.59    8.08  12
   6  17   0   36.46    9.55  12
   7 -17   0   84.73   12.88   1
   7  17   0  100.58    8.67   9
  -7  17   0  101.62   10.95  11
   7  17   0   73.20    8.65   8
  -7 -17   0  104.99    8.82  10
   7  17   0   76.05    9.78  12
   8 -17   0   12.06   15.04   1
  -8  17   0    7.54    6.38  11
  -8 -17   0   21.28    8.73  10
   8  17   0    9.62    7.25  12
   8  17   0   16.15    8.48   8
   8  17   0   21.20    8.83   9
   9  17   0   15.40    9.96   9
  -9 -17   0   27.97    9.14  10
   9  17   0   18.26   10.41  12
  -9  17   0   13.35    9.40  11
   9 -17   0   25.82   12.30   1
   9  17   0    4.77   10.51   8
 -10  17   0   20.76   10.16  11
  10 -17   0   26.32   13.62   1
 -10 -17   0   11.13    9.50  10
  10  17   0   15.12   10.10   8
  10  17   0   10.20   14.44   9
  11  17   0    3.83    8.59  12
  11  17   0   11.85   10.06   9
  11  17   0    5.44    6.18   8
 -11  17   0   25.32   11.42  11
 -11 -17   0   15.31    9.81  10
  11 -17   0   21.93   13.55   1
  12 -17   0   37.27   16.45   1
  12  17   0   34.56   11.13   9
 -12 -17   0   26.93    9.88  10
 -12  17   0   19.92   11.86  11
  12  17   0   16.62    8.99   8
 -13 -17   0   21.89   11.13  10
  13  17   0   23.77   11.77   9
  13  17   0   23.71   10.91   8
 -13  17   0   26.03   12.51  11
  13 -17   0   49.54   17.01   1
  14  17   0   17.62    9.34   9
 -14 -17   0   13.46   10.02  10
  14  17   0   11.27    7.93   8
 -14  17   0   13.34   15.25  11
 -15 -17   0   14.50   10.18  10
   0 -18   0    4.43   14.99   2
   0  18   0   13.43    6.80  11
   0  18   0   21.18    7.59   3
   1  18   0   -1.71    7.90  12
   1  18   0   15.53    7.32  11
  -1 -18   0   12.67    8.78   2
  -1  18   0    3.20   13.92  12
  -1  18   0    5.58   10.02  11
   1 -18   0    3.39    4.43   2
  -1  18   0   11.85    9.82   3
   1  18   0   14.68    8.32   3
   2  18   0    8.21    7.80   8
  -2 -18   0    8.86    7.37  10
  -2  18   0   25.87    8.95  11
  -2  18   0    8.37   18.53   3
  -2 -18   0   20.12    7.85   2
  -3  18   0  165.51   11.17   3
   3  18   0  137.61   11.10  12
  -3 -18   0  146.22    8.56  10
   3  18   0  118.59    8.64   8
  -3 -18   0  166.64   11.03   2
  -3  18   0  137.63   10.94  12
  -3  18   0  136.03   11.86  11
   4  18   0    4.15   49.10  12
  -4  18   0   12.13    8.68   3
  -4 -18   0   17.38    7.73  10
  -4  18   0   12.11   18.64  11
   4  18   0   12.98    7.62   8
  -4 -18   0   27.65    8.74   2
   4  18   0    6.19    5.63   9
   4 -18   0   14.04   10.92   1
   5  18   0   80.03    8.31   8
  -5  18   0  107.18   12.23  11
  -5 -18   0  103.37    8.51  10
   5  18   0   99.43   11.51  12
   5  18   0   99.27    7.27   9
   5 -18   0   95.45   12.75   1
  -5  18   0   84.05    9.52  12
   6 -18   0   21.48   11.88   1
  -6 -18   0   24.58    6.78  10
   6  18   0    7.66    9.71   8
  -6  18   0   15.28    7.73  12
   6  18   0    5.00    8.38  12
  -6  18   0   24.80    9.21  11
   6  18   0   22.53    6.87   9
   7  18   0   11.98    7.87   9
   7  18   0   15.01    8.91  12
  -7 -18   0   13.85    8.37  10
   7  18   0   10.24    9.35   8
   7 -18   0   10.53   10.57   1
  -7  18   0   22.08    9.07  11
  -8  18   0   14.50    8.82  11
   8 -18   0   10.99   12.54   1
   8  18   0   41.23    9.33   9
  -8 -18   0   21.18    9.36  10
   8  18   0    7.63   18.60   8
   8  18   0   13.31   11.28  12
   9  18   0    5.92    6.50   8
   9  18   0   26.15   10.45   9
  -9  18   0   19.97   12.07  11
   9 -18   0   16.40   13.02   1
  -9 -18   0   37.58    9.15  10
   9  18   0   21.96   10.46  12
  10  18   0   22.09   11.97   8
 -10 -18   0   20.10   10.89  10
  10 -18   0   14.73   11.57   1
 -10  18   0   13.04    9.78  11
  10  18   0    8.52    8.02  12
  11 -18   0   75.30   16.64   1
 -11  18   0   57.97   13.83  11
 -11 -18   0   57.48   10.46  10
  11  18   0   23.85   10.82   9
  11  18   0   45.93   11.12   8
  12  18   0    9.87   11.26   8
 -12 -18   0   19.30   10.68  10
 -12  18   0   21.88   13.79  11
  12 -18   0   32.82   14.43   1
  12  18   0   20.75   11.66   9
  13 -18   0   38.75   16.30   1
 -13  18   0   18.99   14.84  11
  13  18   0    0.79    3.61   8
  13  18   0    5.84   16.51   9
 -14 -18   0   -0.88    3.94  10
   0  19   0    5.55    4.53   3
   0  19   0    1.21   14.09  11
   0 -19   0   -1.79    3.03   2
  -1  19   0   80.34   11.07  11
  -1  19   0   43.89    8.98  12
   1  19   0   51.50   10.44  12
   1 -19   0   49.78    9.45   2
  -1 -19   0   48.09    9.86   2
  -1  19   0   64.14    8.82   3
   2  19   0   45.62    9.71  12
  -2  19   0   37.39   10.18  12
  -2  19   0   60.18    9.32   3
  -2 -19   0   69.86    6.99  10
  -2  19   0   68.52   10.71  11
  -2 -19   0   42.28   10.03   2
   3  19   0    9.51    6.56   8
  -3 -19   0   18.49    9.07   2
  -3  19   0   24.39    8.73   3
   3  19   0   13.09   10.24  12
  -3  19   0   24.65    9.08  11
  -3  19   0   14.57   10.03  12
  -3 -19   0   14.31    7.16  10
  -4 -19   0   91.76   10.02   2
  -4  19   0   63.96    9.58  12
  -4  19   0   72.43   11.65  11
  -4 -19   0   83.67    7.64  10
   4  19   0   60.90   10.34  12
   4  19   0   53.48    7.92   8
   4 -19   0   71.02   11.32   1
   5 -19   0    5.62    8.06   1
  -5 -19   0   22.35    7.27  10
  -6  19   0   19.46   12.82  11
   6  19   0   30.61   10.15  12
  -6 -19   0   44.56    8.56  10
   6 -19   0   25.78   11.93   1
  -6  19   0   32.59    8.44  12
   6  19   0   51.90    7.23   9
   6  19   0   34.04    8.71   8
   7 -19   0   17.11   14.38   1
  -7  19   0    5.84   23.32  11
   7  19   0   13.63    8.39   9
  -7 -19   0    5.82    9.01  10
   8  19   0    5.40    8.86   9
  -8  19   0   24.88   10.79  11
   8 -19   0    1.12    7.68   1
  -8 -19   0    1.70    9.84  10
   8  19   0    7.97   12.78  12
   9  19   0    7.07   11.72  12
  -9 -19   0   12.23    9.80  10
   9 -19   0   31.92   14.98   1
   9  19   0   13.46   10.50   8
   9  19   0   19.59    9.68   9
  -9  19   0   22.82   11.69  11
 -10 -19   0   15.23    9.86  10
  10 -19   0   29.92   14.99   1
 -10  19   0   29.65   11.92  11
  10  19   0   18.73   10.66  12
  10  19   0   11.38   14.58   8
  10  19   0   14.02   11.76   9
 -11  19   0   31.23   13.89  11
  11  19   0   29.80   10.19   8
  11 -19   0   35.00   14.75   1
  11  19   0   19.74   12.95   9
 -11 -19   0   19.20    8.89  10
  12  19   0    7.36   10.25   9
  12  19   0    8.55   11.59   8
 -12 -19   0   21.18   12.61  10
  12 -19   0   37.04   17.92   1
 -12  19   0   35.33   13.84  11
  13  19   0    0.24   12.15   9
  13 -19   0   11.29   13.61   1
   0  20   0  337.06   17.18  11
   0 -20   0  341.41   16.22   2
   0  20   0  321.92   17.07  12
   1  20   0    7.27    6.92  12
  -1  20   0    7.13    6.77   3
  -1 -20   0    6.96   10.33   2
  -1  20   0   32.58   10.03  11
  -1  20   0   -0.93    5.68  12
  -2  20   0  107.03   12.22  11
  -2  20   0  101.69   10.52   3
  -2  20   0   93.06   10.67  12
   2  20   0   85.73   11.29  12
  -2 -20   0   93.61   11.41   2
  -3 -20   0   54.46    9.92   2
  -3  20   0   42.14   10.14  11
  -3 -20   0   54.62    7.85  10
   3  20   0   18.31   11.29  12
   3  20   0   25.49    7.54   8
  -3  20   0   48.05    9.93   3
  -3  20   0   20.94   10.74  12
  -4 -20   0    3.90    6.17   2
  -4  20   0   -1.07    3.97  11
   4  20   0   -1.30   54.45   8
  -4 -20   0   16.75    7.84  10
   5  20   0   33.61   11.23  12
   5 -20   0   16.14   13.92   1
  -5  20   0   34.50    9.60  12
   5  20   0   17.74    8.34   8
  -5  20   0   26.24   10.43  11
  -5 -20   0   50.60    8.19  10
  -6 -20   0   73.44    8.53  10
   6 -20   0   54.23   13.73   1
   6  20   0   72.86   12.43  12
   6  20   0   51.83    9.18   8
  -6  20   0   50.39   14.62  11
  -6  20   0   39.05    9.44  12
   7 -20   0    3.05    6.12   1
   7  20   0   16.29    7.99   9
   7  20   0    8.58    9.73   8
  -7 -20   0    5.64   10.13  10
  -8 -20   0   62.39    9.77  10
   8  20   0   58.24   11.58  12
   8 -20   0   93.06   15.21   1
  -8  20   0   73.32   14.26  11
   8  20   0   53.26   10.27   8
   8  20   0   63.12    9.81   9
   9 -20   0   11.04   10.95   1
  -9 -20   0    2.33   13.13  10
  -9  20   0   15.90    9.72  11
  10  20   0   33.19   10.39   8
  10  20   0   13.86   10.64  12
 -10  20   0   50.78   11.72  11
  10  20   0   -1.36   14.16   9
 -10 -20   0   21.22    9.06  10
  10 -20   0   36.51   16.33   1
  11 -20   0   22.78   16.39   1
 -11 -20   0    4.03   10.08  10
 -11  20   0   36.98   12.45  11
 -12 -20   0   15.03   11.12  10
 -13 -20   0   16.64   12.45  10
   0 -21   0   11.02   16.23   2
   0  21   0   16.71   10.59  11
   0  21   0    1.00    6.86  12
   1  21   0  117.18   13.25  12
  -1  21   0  123.35   12.77  12
   1 -21   0  134.92   12.77   2
  -1  21   0  175.41   13.28  11
  -1 -21   0  143.56   12.64   2
  -2  21   0   29.26   10.14  12
   2 -21   0   28.27   11.21   2
   2  21   0   53.03   11.77  12
  -2 -21   0   43.04   11.38   2
  -2  21   0   62.68   11.60  11
   3  21   0   11.25    9.48  12
  -3 -21   0   19.28    9.96   2
  -3  21   0   19.27   10.59  11
  -3  21   0    3.34    8.53  12
   4  21   0   63.55   11.48  12
  -4  21   0  103.47   12.93  11
  -4  21   0   69.85   10.58  12
  -4 -21   0   79.48   11.27   2
  -4 -21   0   83.74    9.13  10
   4  21   0   65.43    9.33   8
   5  21   0    7.44   20.92  12
  -5 -21   0   28.01    8.18  10
  -5  21   0   -1.63    8.87  11
   6  21   0   20.23    9.13   8
   6 -21   0   27.21   13.02   1
   6  21   0   34.31   12.60  12
  -6 -21   0   35.54    9.91  10
  -6  21   0   34.11   13.39  11
  -7 -21   0   19.44    9.24  10
  -7  21   0   21.63   13.61  11
   7  21   0   32.47   12.84  12
   7  21   0   19.56   10.58   8
   7 -21   0   30.44   12.58   1
   8  21   0   17.12   13.60  12
  -8 -21   0   17.97    9.89  10
  -8  21   0    4.51    9.08  11
   8  21   0    1.09   58.65   8
   8 -21   0    5.01   14.63   1
   9  21   0   15.07   10.33   8
   9  21   0   35.33    9.98   9
   9 -21   0   32.68   15.70   1
  -9 -21   0   46.85   10.61  10
  -9  21   0   14.36   12.91  11
   9  21   0   24.41   11.57  12
  10 -21   0   23.56   16.46   1
  10  21   0   -1.76    6.64   9
 -11  21   0   14.86   15.48  11
 -11 -21   0    7.87   11.59  10
  11 -21   0   17.68   12.58   1
  11  21   0   -0.38    7.13   9
  11  21   0   29.56   11.37   8
 -12 -21   0   26.16   12.23  10
  12 -21   0   23.64   18.21   1
   0 -22   0   10.85    9.59   2
   0  22   0   34.97   10.83  11
   0  22   0   19.98   11.77  12
  -1  22   0   35.52   11.73  11
  -1  22   0   19.83   10.07  12
  -1 -22   0   20.85   11.24   2
   1 -22   0   17.49   10.13   2
   1  22   0   11.03   11.99  12
   2  22   0    1.89   27.13  12
  -2  22   0   28.24   11.17  12
  -2 -22   0   32.56   10.77   2
  -2  22   0   30.91   10.72  11
   2 -22   0    5.40   14.55   2
   3  22   0  101.67   13.60  12
  -3  22   0   79.53   11.46  12
  -3  22   0  153.48   14.25  11
   3 -22   0   86.54   12.09   2
  -3 -22   0  119.36   12.38   2
  -4 -22   0   17.02   11.48   2
  -4  22   0   22.28   12.51  11
  -4  22   0    3.66   10.01  12
  -5 -22   0   62.16    9.83  10
  -5  22   0   69.16   11.24  12
   5  22   0   67.60   13.29  12
  -5  22   0   94.12   13.54  11
  -6 -22   0   15.48    9.07  10
   6  22   0    7.44   14.53  12
   6  22   0   -0.86    7.79   8
  -6  22   0   21.29   10.71  11
  -7 -22   0   12.86   11.44  10
  -7  22   0   12.10   11.58  11
   7  22   0   16.17   10.84   8
   7  22   0   10.44   10.05  12
   8  22   0   34.75   13.42  12
  -8  22   0   22.92   11.86  11
   8  22   0   16.92    9.96   8
  -8 -22   0   35.23   10.52  10
  -9  22   0    1.93  414.24  11
   9  22   0    5.04   11.49   8
   9 -22   0   10.78   13.51   1
 -10 -22   0   13.71   11.78  10
  10  22   0    0.68   26.32   8
  10  22   0   10.74   15.47  12
  10 -22   0    7.82   13.13   1
  11 -22   0   34.07   18.44   1
 -11 -22   0   14.69   11.11  10
   0 -23   0    3.25   44.86   2
  -1  23   0   11.93   12.94  12
  -1 -23   0   36.33   12.22   2
   1 -23   0   17.92   14.96   2
   1  23   0   13.51   12.40  12
  -1  23   0   55.02   11.68  11
   2  23   0   42.43   13.59  12
  -2  23   0   42.54   14.49  11
  -2 -23   0   32.59   12.71   2
   2 -23   0   13.59   15.84   2
  -2  23   0   29.38   12.06  12
  -3 -23   0   14.82   10.67   2
   3  23   0    2.32   10.56  12
  -3  23   0   10.19   11.89  12
  -3  23   0   22.28   15.38  11
  -4  23   0   42.12   10.98  12
   4  23   0   63.40   13.39  12
  -4  23   0   79.43   14.23  11
   5  23   0   15.07   12.50  12
  -5  23   0   23.20   10.60  11
  -6  23   0   27.44   12.42  11
   6  23   0   24.40   13.45  12
   7  23   0    0.44    2.15  12
   7  23   0    1.31   12.52   8
  -7 -23   0    9.68   11.63  10
  -7  23   0   22.25   15.44  11
  -8 -23   0   10.59   14.86  10
   9  23   0   11.88   16.36  12
   9  23   0   15.09   13.00   8
  -9 -23   0   23.14   13.76  10
  -9  23   0    6.39   15.09  11
  10  23   0    0.70   19.97  12
 -10 -23   0   10.16    9.08  10
   0  24   0   61.05   13.55  12
   0 -24   0   62.54   13.58   2
   1  24   0    5.80   10.16  12
  -1  24   0    1.91   26.40  12
  -1 -24   0   17.30   12.99   2
  -1  24   0   36.50   13.34  11
  -2 -24   0   31.21   12.76   2
  -2  24   0   25.16   10.33  12
   2  24   0   30.20   11.94  12
  -2  24   0   37.58   11.74  11
   2 -24   0    6.54   16.43   2
   3  24   0   43.77   14.14  12
  -3  24   0    1.72   35.58  12
  -3 -24   0   11.42   11.61   2
   3 -24   0   11.64   14.68   2
  -3  24   0   53.20   12.79  11
  -4  24   0   27.84   13.27  11
   5  24   0   14.99   13.16  12
  -5  24   0   19.69   11.06  11
   6  24   0   29.45   13.52  12
  -6  24   0   58.59   14.12  11
  -7  24   0    1.16   16.32  11
  -8 -24   0   13.85   11.51  10
   8  24   0   19.83   12.96   8
   8  24   0   38.56   14.37  12
   0 -25   0    2.54  388.02   2
  -1  25   0   13.78   10.24  12
   1  25   0   26.85   11.85  12
  -1 -25   0   35.05   12.80   2
   1 -25   0    5.15    9.61   2
  -2 -25   0   14.21   15.41   2
  -2  25   0    4.50   10.62  12
  -2  25   0   37.45   12.76  11
   2 -25   0    3.77   13.70   2
   2  25   0   17.86   12.33  12
  -3  25   0    5.37   15.67  12
  -3  25   0   17.35   13.25  11
  -4  25   0   53.56   15.01  11
   4  25   0   48.11   13.71  12
  -4  25   0   13.63   14.42  12
  -5  25   0   22.96   11.72  11
   5  25   0   15.05   15.26  12
  -6  25   0   22.05   15.58  11
   0  26   0    3.85   13.45  12
   0 -26   0   12.96   12.39   2
   1 -26   0    3.25   11.43   2
  -1 -26   0    6.95   11.81   2
   1  26   0    4.09   12.25  12
  -2 -26   0   -1.33 1110.08   2
  -2  26   0   17.55   13.26  12
  -2  26   0   23.64   14.74  11
   3 -26   0   14.39   15.33   2
  -3  26   0   34.04   14.45  11
  -3  26   0   27.32   12.78  12
 -19   0   1    9.73   14.95  11
  18   0  -1    5.03   12.36   9
  17   0  -1    9.72    6.77   9
  16   0  -1   29.74    8.60   9
  15   0  -1   13.55    7.44   9
 -14   0   1   13.33    6.35  10
  14   0  -1   15.79    6.35   8
  14   0  -1   10.50    8.33   9
 -13   0   1    5.98    5.33  10
  13   0  -1   23.15   10.07   9
  13   0  -1   12.97    7.31   8
  12   0  -1   -0.52    5.18   8
  12   0  -1    6.07   28.51   9
 -12   0   1    4.86    4.35  10
  11   0  -1   10.14   10.31   9
  11   0  -1   12.51    5.48   8
 -11   0   1   11.15    5.55  10
 -10   0   1   -0.05    0.25  10
   9   0  -1   13.95    5.55   8
  -9   0   1    3.86    5.58   7
   9   0  -1   22.31    6.10   9
  -9   0   1   27.84    4.20  10
   8   0  -1    0.45    7.07   9
  -8   0   1    0.09    1.73  10
  -7   0   1   96.27    9.78   7
   7   0  -1   98.69    5.27   8
   7   0  -1   96.12    5.49   9
   6   0  -1   -2.20    1.97   8
   6   0  -1    0.83    1.96   9
  -5   0   1 2535.04  113.71   7
   5   0  -1 2682.13   95.66   8
   5   0  -1 2613.58   81.22   9
   4   0  -1    2.67    2.25   8
   4   0  -1   -0.14    2.80   9
  -4   0   1    0.92    6.01   7
   3   0  -1 3055.02   97.72   9
  -3   0   1 2832.46  135.88   7
   3   0  -1 3110.63  105.63   8
   3   0   1 3278.34  150.06   1
  -3   0  -1 3291.46  104.23  10
  -3   0  -1 3285.77   96.15   6
   3   0   1 3375.43  116.75   8
  -4   0  -1    1.89    1.28  10
   4   0   1    8.04    2.67   1
   5   0   1 3059.35  101.51   8
  -5   0  -1 3044.63   90.95  10
   5   0   1 2897.62  129.65   1
   6   0   1    2.95    4.15   8
  -6   0  -1    1.45    2.08  10
   7   0   1 1225.32   42.01   8
   7   0   1 1186.72   38.84   9
  -7   0  -1 1248.32   37.60  10
   8   0   1    2.12    3.40   9
   8   0   1    1.96    6.45   8
   9   0   1   13.06    7.14   9
  -9   0  -1   11.62    4.85  10
   9   0   1    8.02    4.99   8
  10   0   1   -1.32    2.60   9
 -10   0  -1    2.93    5.87  10
  11   0   1  162.52    9.46   9
 -11   0  -1  174.44    7.90  10
  11   0   1  169.80    9.31   8
  12   0   1    4.23    5.97   9
  13   0   1  176.88   10.41   9
 -13   0  -1  176.31    8.64  10
  13   0   1  169.68   10.25   8
  14   0   1    6.82   46.92   9
 -14   0  -1   -1.52    2.15  10
  14   0   1    1.81    3.35   8
  15   0   1   16.91    7.93   9
  17   0   1   19.77   10.50   9
  18   0   1    5.85    5.51   9
  19   0   1   25.19   13.38   9
  19   1  -1   -2.52   17.40   9
 -18   1   1    8.79   21.62  11
  18  -1  -1   20.02    9.12   9
  17   1  -1   20.68    8.46   9
  17  -1  -1   25.21    8.74   9
  16  -1  -1    0.21    1.00   9
  16   1  -1    1.02   77.51   9
 -15  -1   1    9.76    7.13  10
  15   1  -1    9.85   14.15   9
  15  -1  -1   14.90    6.66   9
  15   1  -1    8.04    5.60   8
 -14  -1   1    8.05    6.27  10
  14  -1  -1    9.16    7.79   9
  14   1  -1    6.86    5.34   8
  14   1  -1   10.83    6.03   9
  13   1  -1    1.33    2.27   8
  13  -1  -1    2.36   11.48   8
 -13  -1   1    0.90    4.58  10
 -13   1   1    6.57    5.11  10
 -12   1   1   -0.57    1.78  10
 -12  -1   1    0.99   28.74  10
  12  -1  -1    9.57    5.36   9
  12   1  -1   -2.37    2.41   8
  12  -1  -1    5.82   21.85   8
  11   1  -1    0.30    0.47   9
 -11  -1   1   -0.72   32.09  10
  11  -1  -1   -0.25    1.26   9
 -11   1   1   -1.64    3.03  10
 -10   1   1    8.12    4.75  10
  10  -1  -1    5.81   21.15   9
 -10  -1   1   13.97    5.22  10
  10  -1  -1    9.51    6.19   8
  10   1  -1    5.67   15.11   8
  10   1  -1   13.03   10.68   9
   9  -1  -1   18.34    6.92   8
   9  -1  -1   31.55    6.08   9
  -9   1   1   32.62    4.16  10
   9   1  -1   18.79    5.83   9
   9   1  -1   26.83    7.82   8
  -9   1   1   20.81   20.78   7
  -9  -1   1   39.49    4.58  10
   8  -1  -1   18.19    4.64   8
  -8   1   1   13.71   24.20   7
   8  -1  -1   17.62    5.43   9
   8   1  -1   19.52    4.69   9
  -8  -1   1   19.17   11.00   7
   8   1  -1   17.59    5.06   8
  -8   1   1   17.06    3.46  10
   8   1  -1   13.26    1.67  12
   7   1  -1  175.34    7.58   9
  -7   1   1  173.96    6.47  10
   7  -1  -1  178.65    7.30   9
  -7  -1   1  165.83   11.68   7
   7  -1  -1  177.27    7.40   8
  -7   1   1  160.09   11.88   7
   7   1  -1  174.24    7.75   8
  -6  -1   1   78.19    8.43   7
   6   1  -1   82.66    4.96   8
   6   1  -1   84.46    4.90   9
  -6   1   1   69.90    9.21   7
   6  -1  -1   86.40    4.47   8
   6  -1  -1   84.41    4.68   9
   5  -1  -1  155.29    6.13   9
   5   1  -1  162.17    6.58   8
  -5   1   1  150.10    9.57   7
   5  -1  -1  161.71    6.24   8
   5   1  -1  161.07    6.35   9
  -5  -1   1  149.13    9.30   7
  -4  -1   1  231.15   12.14   7
   4  -1  -1  245.96    8.31   9
   4  -1  -1  244.42   12.01   1
   4  -1  -1  248.93    8.77   8
   4   1  -1  250.23    9.04   8
   4   1  -1  239.79    8.44   9
  -4   1   1  233.48   12.22   7
  -3   1   1   43.70    4.93   7
   3  -1  -1   38.97    2.68   8
   3   1  -1   38.87    3.38   8
   3  -1  -1   56.00    4.89   1
   3  -1  -1   40.72    2.88   9
  -3  -1   1   38.43    4.83   7
   3   1  -1   39.84    3.57   9
  -3   1  -1 1086.81   32.02  10
   3   1   1 1072.69   35.87   8
  -3  -1  -1 1023.55   32.11  10
   3  -1   1 1097.52   35.73   8
  -3   1  -1  971.06   46.31   7
  -3  -1  -1 1024.90   29.38   6
   3  -1   1 1078.86   45.90   1
  -4   1  -1 1057.85   31.38  10
  -4  -1  -1 1023.66   28.84   6
   4  -1   1 1039.26   45.02   1
  -4   1  -1  973.65   45.43   7
   4  -1   1 1051.92   35.03   8
   4   1   1 1038.54   35.18   8
  -4  -1  -1 1006.30   31.47  10
   5  -1   1    3.10    2.92   8
   5   1   1    1.97    2.29   8
   5  -1   1    3.73    2.24   1
  -5  -1  -1    3.00    1.77  10
  -5   1  -1    1.73    2.27  10
  -6   1  -1  636.78   19.23  10
   6   1   1  600.07   21.67   8
   6  -1   1  575.07   27.94   1
   6  -1   1  624.08   21.50   8
  -6  -1  -1  621.34   19.36  10
   6   1   1  619.62   20.14   9
   7   1   1  391.48   13.98   9
   7   1   1  403.22   14.87   8
  -7   1  -1  407.99   13.11  10
   7  -1   1  388.92   19.60   1
   7  -1   1  400.52   14.64   8
  -7  -1  -1  409.40   13.24  10
   8   1   1   27.33    4.51   8
  -8   1  -1   21.63    4.91  10
   8   1   1   19.66    5.86   9
   8  -1   1   22.27    4.54   8
   8  -1   1   25.51    4.91   9
  -8  -1  -1   24.87    4.03  10
   9  -1   1  410.09   15.77   8
   9   1   1  415.34   16.12   8
  -9   1  -1  431.32   14.14  10
   9   1   1  401.51   15.27   9
   9  -1   1  426.02   15.19   9
  -9  -1  -1  413.68   14.26  10
  10   1   1  167.91    9.66   9
  10  -1   1  177.42    9.01   8
  10   1   1  178.48    9.50   8
  10  -1   1  167.47    9.43   9
 -10   1  -1  180.65    7.94  10
 -10  -1  -1  176.29    8.25  10
  11   1   1   92.80    8.26   9
 -11   1  -1   94.83    6.32  10
  11   1   1  101.07    7.96   8
  11  -1   1   99.35    7.33   8
 -11  -1  -1   98.15    6.56  10
  11  -1   1  110.05    8.10   9
  12   1   1  170.57   10.30   9
  12  -1   1  188.55    9.99   8
 -12  -1  -1  187.34    8.61  10
  12   1   1  194.51   10.46   8
 -12   1  -1  193.02    8.45  10
  12  -1   1  176.07    9.73   9
  13   1   1    3.09    3.20   9
  13  -1   1   -1.37    8.20   9
 -13   1  -1   -0.35    8.49  10
 -13  -1  -1    2.41    5.87  10
  13  -1   1    3.13    5.64   8
  13   1   1    6.76    6.46   8
  14   1   1   80.37    9.36   9
 -14  -1  -1   78.27    7.20  10
  14   1   1   79.51    8.82   8
  14  -1   1   72.51    9.08   9
 -15  -1  -1   40.94    7.18  10
  15   1   1   34.78   10.34   9
  15   1   1   44.16    8.66   8
  15  -1   1   41.69    9.79   9
  16  -1   1   12.78    6.33   9
  16   1   1    0.71   15.40   9
  17   1   1   12.74    6.68   9
  17  -1   1   25.28    9.26   9
  18   1   1    6.55   16.40   9
  18  -1   1   19.20   10.26   9
  19   1   1   20.51   14.41   9
  19   2  -1    3.46   10.36   9
 -19   2   1    2.96   15.96  11
  18   2  -1    2.68    3.86   9
 -18   2   1    7.42   14.05  11
  17  -2  -1   19.49    8.74   9
  17   2  -1   17.57   11.35   9
 -17   2   1   21.83   13.91  11
  16   2  -1   21.62   10.04   9
 -16   2   1   13.59   14.11  11
  16   2  -1    9.65    7.48   8
  16  -2  -1   20.19    8.92   9
  15   2  -1   15.40    6.93   8
  15  -2  -1    2.58   14.19   9
 -15  -2   1    2.38   14.90  10
  14  -2  -1    0.74    1.78   9
 -13  -2   1   18.48    6.42  10
  13   2  -1   10.40    7.42   9
  13   2  -1    4.37    6.89   8
  13  -2  -1   16.31    6.40   9
 -12  -2   1   12.14    5.08  10
  12   2  -1    3.11   29.58   8
  12  -2  -1    1.85    7.73   9
  12   2  -1    3.87    6.78   9
  12  -2  -1    2.81   85.01   8
 -11   2   1   50.97    5.38  10
  11   2  -1   41.33    7.13   8
  11  -2  -1   50.20    7.85   9
  11  -2  -1   48.49    6.22   8
  11   2  -1   44.36    7.13   9
 -11  -2   1   76.62    5.99  10
 -10  -2   1    5.14    3.99  10
  10   2  -1    0.95    8.73   9
   9   2  -1   24.67    3.24  12
   9  -2  -1   41.85    5.77   9
   9  -2  -1   37.96    5.63   8
   9   2  -1   29.09    7.35   9
  -9   2   1   39.48    4.44  10
  -9  -2   1   40.66    5.11  10
  -9   2   1   35.39   16.62   7
   9   2  -1   40.55    6.26   8
  -8   2   1   64.95    4.13  10
  -8   2   1   40.00   11.49   7
   8   2  -1   51.81    3.33  12
   8   2  -1   59.21    5.86   8
   8  -2  -1   60.08    5.16   9
   8  -2  -1   59.72    4.72   8
   8   2  -1   54.24    6.01   9
   7  -2  -1   43.29    4.32   9
   7   2  -1   38.17    4.78   8
  -7  -2   1   33.78   10.31   7
   7  -2  -1   41.64    4.00   8
  -7   2   1   40.75    3.23  10
  -7   2   1   38.45   10.04   7
   7   2  -1   43.80    4.76   9
  -6   2   1  221.89    7.24  10
  -6   2   1  204.61   12.35   7
   6  -2  -1  215.08    8.10   8
  -6  -2   1  204.65   12.09   7
   6   2  -1  207.96    8.20   9
   6   2  -1  212.02    8.69   8
   6  -2  -1  213.92    7.90   9
   6  -2  -1  212.53   11.84   1
   5  -2  -1   89.68    6.48   1
   5  -2  -1   83.50    4.04   9
   5   2  -1   82.51    4.76   8
   5  -2  -1   82.87    3.93   8
  -5  -2   1   71.19    7.40   7
   5   2  -1   84.32    4.62   9
  -5   2   1   84.30    7.62   7
   4  -2  -1   14.07    2.49   9
   4  -2  -1   11.16    2.01   8
  -4   2   1   14.23    7.72   7
   4  -2  -1   15.91    4.85   1
  -4  -2   1    7.88  103.92   7
   4   2  -1   10.21    3.25   9
   4   2  -1    9.94    3.26   8
  -3   2   1   12.03    9.96   3
  -3  -2   1   15.74    4.93   7
  -3   2   1   16.64    6.91  11
   3   2  -1   18.09    3.20   9
   3  -2  -1   14.13    2.04   8
   3   2  -1   21.85    2.91   8
  -3   2   1   14.81    1.77  12
   3  -2  -1   29.19    4.34   1
  -3   2   1   19.81    4.23   7
  -2  -2   1  443.64   20.81   7
   2  -2  -1  502.12   20.87   1
  -2   2   1  470.60   21.18   7
  -2   2  -1  988.59   45.99   7
   2  -2   1 1148.41   35.48   8
  -2  -2  -1 1009.93   29.21   6
  -3   2  -1  140.01    8.88   7
   3   2   1  148.34    6.27   8
  -3   2  -1  145.40    4.90  10
   3  -2   1  144.38    8.44   1
  -3  -2  -1  143.59    4.84   6
   3  -2   1  147.38    5.56   8
   4   2   1   39.17    3.57   9
  -4  -2  -1   33.02    2.63   6
  -4   2  -1   36.59    2.55  10
   4  -2   1   42.34    2.71   8
  -4   2  -1   29.53    7.09   7
   4   2   1   36.71    3.54   8
   4  -2   1   29.67    5.26   1
   5   2   1   36.52    4.09   8
   5   2   1   34.93    3.91   9
  -5  -2  -1   39.90    3.34  10
  -5   2  -1   37.57    2.95  10
  -5  -2  -1   34.74    2.88   6
   5  -2   1   37.10    3.03   8
  -5   2  -1   32.09    8.49   7
   5  -2   1   32.73    5.39   1
  -6  -2  -1  920.04   28.90  10
  -6   2  -1  983.35   28.69  10
   6   2   1  941.37   29.89   9
   6  -2   1  960.70   32.03   8
  -6   2  -1  886.40   41.81   7
   6  -2   1  889.28   41.47   1
   6   2   1  933.78   32.33   8
   7  -2   1   35.76    3.99   8
   7   2   1   37.01    4.45   8
   7  -2   1   48.06    6.98   1
  -7  -2  -1   31.32    3.97  10
   7   2   1   29.39    5.70   9
  -7   2  -1   36.35    3.42  10
   8   2   1 1240.42   40.41   9
  -8   2  -1 1356.96   38.84  10
   8  -2   1 1184.60   56.18   1
  -8  -2  -1 1271.42   39.04  10
   8   2   1 1232.58   43.66   8
   8  -2   1 1253.28   40.18   9
   8  -2   1 1271.74   43.31   8
   9   2   1    8.36    6.00   9
   9   2   1   15.90    6.86   8
  -9   2  -1    2.67   11.24  10
  -9  -2  -1   13.84    4.44  10
   9  -2   1   12.48    4.90   9
   9  -2   1   15.31    6.98   8
  10   2   1  309.48   13.50   9
  10   2   1  337.82   14.03   8
 -10  -2  -1  340.75   12.33  10
 -10   2  -1  352.34   12.03  10
  10  -2   1  332.74   13.48   8
  10  -2   1  328.83   13.21   9
  11   2   1   19.73    7.77   8
  11  -2   1   22.83    5.39   9
  11   2   1   31.40    6.54   9
  11  -2   1   20.08    6.32   8
 -11  -2  -1   15.15    5.19  10
 -11   2  -1   18.69    5.40  10
  12  -2   1   27.59    6.66   9
  12  -2   1   17.77    5.70   8
  12   2   1   31.14    7.25   8
  12   2   1   17.11    8.29   9
 -12   2  -1   14.45    4.78  10
 -12  -2  -1   17.07    5.60  10
 -13  -2  -1   23.58    6.60  10
  13   2   1   14.94    6.92   9
  13  -2   1   17.98    6.29   9
  13   2   1    4.54    3.93   8
  14   2   1   98.71    9.56   8
  14   2   1   91.86   10.66   9
 -14  -2  -1   81.63    7.45  10
  14  -2   1  104.78    9.40   9
  15   2   1   -0.16    2.20   9
 -15  -2  -1    7.03    6.99  10
  15  -2   1   13.95    9.75   9
  16   2   1  106.36   11.86   9
  16  -2   1  106.99   11.23   9
  17  -2   1   19.07    7.28   9
  17   2   1   25.47    9.11   9
 -18   2  -1   47.43   15.10  11
  18   2   1   41.79   11.20   9
 -19   2  -1    7.01   11.99  11
  19   2   1    6.97   19.00   9
  19   3  -1    6.41   11.78   9
 -19   3   1   18.05   13.48  11
  18   3  -1    4.88   22.73   9
 -18   3   1    1.67    9.41  11
 -17   3   1   23.90   13.74  11
  17   3  -1   11.36   10.25   9
 -16  -3   1   12.73    7.90  10
 -16   3   1   26.13   11.89  11
  16   3  -1   18.14    7.36   9
  16  -3  -1   -1.12    5.09   9
  16   3  -1    3.70    5.03   8
 -15   3   1   23.05   12.23  11
 -15  -3   1   23.30    7.68  10
  15   3  -1   22.01    8.08   9
  15  -3  -1   18.87   11.03   9
  15   3  -1   14.33    8.76   8
 -14   3   1    4.75   12.45  11
  14   3  -1   23.07    8.47   9
  14   3  -1    0.51    1.52   8
 -14  -3   1   11.11    6.22  10
  14  -3  -1    3.69    6.58   9
  13   3  -1    5.06   31.48   9
  13   3  -1   10.68    7.02   8
  13  -3  -1   18.62    7.57   9
 -13  -3   1   14.71    6.21  10
  12   3  -1    5.36   14.50   9
  12  -3  -1    4.58   10.64   9
 -12  -3   1   12.22    5.23  10
 -11  -3   1   20.97    5.81  10
  11  -3  -1   21.22    6.06   8
  11  -3  -1   29.10    6.50   9
  11   3  -1   17.28    7.94   8
  11   3  -1   22.72    7.30   9
 -11   3   1   18.66    4.66  10
 -10   3   1   54.14    5.40  10
  10  -3  -1   60.83    7.09   9
  10   3  -1   66.36    7.97   9
  10  -3  -1   73.15    6.26   8
 -10  -3   1   80.75    6.01  10
  10   3  -1   60.71    7.99   8
 -10   3   1   67.73   15.19   7
   9   3  -1   13.32   12.56   8
   9  -3  -1   15.98    5.82   8
  -9   3   1   33.18   24.42   7
   9  -3  -1   18.99    5.26   9
  -9   3   1   16.99    4.38  10
   9   3  -1   12.92    7.52   9
   9   3  -1   15.47    3.60  12
   8   3  -1  167.12    8.10   9
   8  -3  -1  164.12    7.42   9
   8   3  -1  172.10    8.38   8
   8  -3  -1  177.24    7.26   8
   8   3  -1  155.74    7.16  12
  -8   3   1  171.05    6.45  10
  -8   3   1  154.14   12.80   7
  -7   3   1  101.49    4.54  10
   7  -3  -1  109.39    5.28   9
   7   3  -1  112.60    6.38   8
   7   3  -1  107.13    6.32   9
   7  -3  -1  101.24    5.12   8
  -7   3   1   89.24   10.33   7
   7  -3  -1  110.01    9.08   1
   6   3  -1   98.90    5.71   9
   6  -3  -1  113.06    8.12   1
   6  -3  -1  105.74    4.98   9
  -6  -3   1   91.47    8.93   7
   6  -3  -1  104.48    4.74   8
  -6   3   1  108.42    4.19  10
   6   3  -1  102.87    5.95   8
  -6   3   1   98.00    9.23   7
   5  -3  -1  139.99    8.60   1
  -5   3   1  135.40    9.28   7
   5   3  -1  134.88    6.34   8
   5   3  -1  138.28    6.10   9
   5  -3  -1  144.46    5.42   8
  -5  -3   1  128.55    8.81   7
  -5   3   1  145.45    4.83  10
   4   3  -1   94.91    4.56   9
   4  -3  -1   93.79    3.65   8
   4  -3  -1   97.61    6.49   1
  -4   3   1   86.61    7.43   7
  -4   3   1   89.12    3.98  12
  -4   3   1   87.68    3.27  10
  -4  -3   1   83.93    6.52   7
  -4   3   1   86.54    6.03  11
   4   3  -1   99.54    4.75   8
   3  -3  -1  448.57   19.27   1
  -3   3   1  404.31   15.83  12
  -3   3   1  415.95   15.48   3
   3   3  -1  433.81   14.95   8
   3   3  -1  422.30   13.83   9
  -3  -3   1  417.28   19.05   7
  -3   3   1  404.05   19.48   7
  -3   3   1  422.57   15.74  11
  -2  -3   1  836.17   23.23   6
  -2   3   1  813.22   29.69  11
   2   3  -1  823.09   26.24   9
   2   3  -1  832.46   28.55   8
   2  -3  -1  904.16   36.52   1
  -2   3   1  815.01   36.89   7
  -2   3   1  798.05   29.25   3
   1   3  -1  386.97   11.81   8
   1   3  -1  291.32   10.75   9
   0   3  -1   -0.23    0.80   8
   0   3  -1    2.82    0.67  11
   0   3   1    2.27    2.88   3
   1   3   1  469.79   16.74   8
  -1   3  -1  501.09   17.42  11
   2   3   1  372.82   13.06   8
  -2   3  -1  359.51   13.83  11
  -2  -3  -1  360.26   10.48   6
   2   3   1  371.74   12.04   9
  -2   3  -1  356.49   17.00   7
  -2   3  -1  362.48   13.92  12
   2   3   1  357.71   13.80   3
   3   3   1   30.77    3.49   8
  -3   3  -1   28.61    5.54  11
  -3   3  -1   29.00    5.57   7
  -3  -3  -1   32.68    2.30   6
   3   3   1   33.70    3.50   9
  -3   3  -1   30.69    2.19  10
   3  -3   1   33.74    2.09   8
   4   3   1  537.73   17.75   9
  -4   3  -1  526.60   24.95   7
  -4  -3  -1  532.77   15.60   6
   4  -3   1  559.15   18.75   8
   4  -3   1  570.92   24.82   1
   4   3   1  545.59   19.26   8
  -4   3  -1  547.66   16.77  10
  -5   3  -1  148.09    5.06  10
   5   3   1  146.85    6.65   8
  -5  -3  -1  140.73    5.16   6
   5   3   1  141.24    6.34   9
   5  -3   1  146.97    5.76   8
  -5   3  -1  134.34    9.63   7
   5  -3   1  147.51    8.86   1
   6   3   1  552.02   19.78   8
  -6  -3  -1  562.39   16.11   6
   6   3   1  546.14   18.38   9
  -6   3  -1  568.81   17.24  10
  -6  -3  -1  547.72   17.65  10
   6  -3   1  552.92   19.24   8
   6  -3   1  539.87   25.60   1
  -6   3  -1  534.91   25.79   7
  -7  -3  -1  247.27    8.84  10
   7   3   1  230.15    9.40   9
  -7   3  -1  240.75    8.20  10
   7   3   1  222.60    9.89   8
  -7   3  -1  224.42   14.09   7
   7  -3   1  238.02   13.23   1
   7  -3   1  238.27    9.09   8
   8  -3   1   37.81    7.63   1
  -8  -3  -1   24.21    5.12  10
  -8   3  -1   16.36    4.79  10
   8  -3   1   26.50    4.07   8
   8   3   1   13.24    5.83   9
   8   3   1   26.13    5.32   8
   9   3   1  421.04   16.50   8
  -9  -3  -1  426.51   14.65  10
   9  -3   1  413.96   15.11   9
  -9   3  -1  448.87   14.09  10
   9   3   1  414.62   15.60   9
   9  -3   1  419.69   15.68   8
   9  -3   1  401.45   22.20   1
 -10  -3  -1   34.59    5.99  10
  10  -3   1   38.75    6.95   9
 -10   3  -1   35.63    5.12  10
  10   3   1   48.12    7.93   9
  10  -3   1   40.35    5.66   8
  10   3   1   35.85    7.21   8
  11   3   1   49.22    7.51   8
 -11   3  -1   63.84    4.77  10
 -11  -3  -1   66.55    6.21  10
  11   3   1   49.67    7.51   9
  11  -3   1   48.22    6.10   8
  11  -3   1   60.10    6.71   9
  12   3   1  231.19   11.55   9
  12  -3   1  241.01   11.07   9
 -12  -3  -1  228.30   10.19  10
  12   3   1  238.77   11.86   8
 -13  -3  -1    8.48    5.83  10
  13  -3   1    6.61    3.86   9
  13   3   1    5.91    6.54   9
  13   3   1    3.14    5.86   8
  14   3   1  146.98   10.66   8
 -14  -3  -1  134.27    8.47  10
  14   3   1  141.97   11.10   9
  14  -3   1  139.93   10.02   9
  15  -3   1   50.92    8.90   9
  15   3   1   40.51    9.42   8
  15   3   1   27.67    8.65   9
 -15  -3  -1   29.50    7.65  10
  16   3   1   33.41   11.39   9
 -16  -3  -1    3.51    5.06  10
  16   3   1   11.41   13.74   8
 -17   3  -1   46.70   14.13  11
  17   3   1   64.30   10.98   9
  18   3   1   23.08   11.41   9
 -18   3  -1   25.92   15.37  11
 -19   3  -1   14.06   15.71  11
  19   3   1   19.72   10.81   9
  19   4  -1    7.47   14.72   9
  18   4  -1   30.40    9.19   9
 -18   4   1   16.90   14.01  11
 -17  -4   1    5.77    8.82  10
  17   4  -1   18.46    8.71   8
  17   4  -1   19.41    8.35   9
 -17   4   1    6.26    7.58  11
 -16   4   1   14.53   11.49  11
  16   4  -1   32.72    9.37   9
 -16  -4   1   28.07    8.41  10
  16   4  -1   25.32    8.70   8
 -15   4   1    1.05    4.71  11
 -15  -4   1    0.97    5.40  10
  15   4  -1    0.99    3.64   9
  15  -4  -1    0.48    1.68   9
 -14   4   1    9.36   12.48  11
  14   4  -1    6.33    6.89   8
 -14  -4   1   24.45    6.45  10
  14   4  -1   26.55    7.87   9
  14  -4  -1   22.44    8.84   9
  13   4  -1    5.92    6.59   9
 -13  -4   1    1.30    7.99  10
 -12   4   1  149.87   11.82  11
  12   4  -1  146.85    9.54   8
  12  -4  -1  150.42    8.70   9
 -12  -4   1  145.02    7.98  10
  12   4  -1  152.63   10.11   9
 -11  -4   1   16.87    5.85  10
  11   4  -1   24.34    9.75   9
  11   4  -1   10.43   18.77   8
  11  -4  -1   12.40    7.73   9
 -11   4   1   19.70    9.74  11
 -10   4   1   62.42   14.35   7
  10  -4  -1   51.12    5.85   8
 -10  -4   1   67.63    6.34  10
  10   4  -1   63.95    7.89   8
  10   4  -1   49.68    8.70   9
 -10   4   1   69.62    9.33  11
  10  -4  -1   67.15    6.65   9
 -10   4   1   49.31    5.03  10
   9  -4  -1   55.96    5.90   9
  -9   4   1   53.46   15.44   7
   9  -4  -1   47.25    5.34   8
   9   4  -1   50.53    7.70   9
   9   4  -1   43.60    7.66   8
  -9   4   1   41.78    4.56  10
   9   4  -1   49.38    4.73  12
  -9   4   1   59.92    9.46  11
  -8   4   1    2.88    8.73  11
   8  -4  -1   14.64    4.25   8
  -8   4   1    2.22   10.44  10
   8  -4  -1   21.13    8.48   1
   8   4  -1    6.73   53.25   8
   8   4  -1   10.36    6.31   9
  -8   4   1    7.65   11.64   7
   8  -4  -1   11.01    3.74   9
  -7   4   1   -1.76    1.88  10
  -7   4   1    2.36    4.11   7
   7  -4  -1   16.75    5.75   1
   7   4  -1    4.40    4.29   9
   7  -4  -1    0.68    5.94   8
   7   4  -1    2.40   10.07   8
   6  -4  -1  528.50   17.16   9
   6  -4  -1  521.17   24.72   1
  -6   4   1  520.50   25.05   7
  -6   4   1  542.93   16.41  10
   6   4  -1  541.12   17.77   9
  -6   4   1  515.94   20.19  11
   6  -4  -1  519.26   18.29   8
   6   4  -1  544.82   19.17   8
  -5   4   1   75.38    7.82   7
   5  -4  -1   78.59    6.61   1
  -5   4   1   71.65    6.14  11
   5  -4  -1   67.65    3.15   8
  -5   4   1   68.84    2.88  10
   5   4  -1   71.98    4.93   8
   5   4  -1   78.09    4.68   9
  -4   4   1  455.20   22.07   7
   4  -4  -1  429.48   16.28   8
   4   4  -1  507.39   17.12   8
  -4   4   1  477.68   17.92  11
  -4   4   1  488.15   18.10  12
   4  -4  -1  502.38   22.05   1
  -4   4   1  488.29   17.65   3
   4   4  -1  499.15   15.82   9
   3   4  -1  639.47   20.57   9
  -3   4   1  619.49   23.28  11
   3   4  -1  645.38   22.73   3
  -3   4   1  603.42   28.80   7
   3  -4  -1  686.04   28.70   1
  -3  -4   1  670.79   18.10   6
  -3   4   1  623.59   22.92   3
  -3   4   1  624.88   24.04  12
   3   4  -1  672.58   22.37   8
  -2  -4   1  411.57   11.53   6
   2   4  -1  404.72   13.24   9
  -2  -4   1  410.57   13.56   2
  -2   4   1  408.55   15.37  11
   2   4  -1  422.78   14.48   8
   2   4  -1  418.32   14.53   3
  -2   4   1  383.53   14.89   3
  -2   4   1  400.63   18.89   7
  -1  -4   1  496.98   16.39   2
   1   4  -1  492.97   17.78   3
   1   4  -1  480.77   18.30  11
   1   4  -1  527.27   16.14   9
  -1   4   1  505.44   22.67   7
   1   4  -1  517.04   19.30  12
  -1   4   1  502.89   18.50  11
  -1   4   1  499.62   18.24   3
   1   4  -1  529.99   17.57   8
   0   4  -1  831.67   29.38   3
   0   4   1  883.33   30.08  11
   0  -4  -1  896.54   25.04   5
   0  -4  -1  905.59   23.52   6
   0   4  -1  699.80   28.59   8
   0   4  -1  880.40   29.93  11
   0   4  -1  920.30   31.56  12
   0   4   1  706.37   28.63   8
   0   4   1  873.59   29.50   3
  -1   4  -1   30.77    3.45  12
   1   4   1   30.80    3.46   8
   1   4   1   35.08    3.61  11
  -1   4  -1   25.46    5.58   7
   1   4   1   28.60    3.62   3
   1  -4   1   27.74    3.69   4
  -1  -4  -1   32.46    2.16   6
   1   4   1   27.14    2.92   9
  -1   4  -1   25.43    4.64  11
  -1   4  -1   23.91    1.93   9
  -1   4  -1   26.79    3.77   3
  -1  -4  -1   32.00    4.51   2
  -1  -4  -1   26.70    1.90   5
   2   4   1    4.70    2.37   9
  -2   4  -1    6.95    3.88  11
   2  -4   1    5.74    3.51   4
  -2  -4  -1    8.59    2.57   2
   2   4   1    4.10    5.61   8
   2   4   1    8.60    2.94   3
  -2  -4  -1    7.17    1.75   6
   3   4   1 1059.49   38.48   3
   3   4   1 1131.13   37.61   8
   3  -4   1 1153.04   37.07   8
  -3  -4  -1 1097.07   30.64   6
  -3   4  -1 1063.25   39.01  11
  -3   4  -1 1074.16   40.76  12
  -3   4  -1 1059.67   48.34   7
   3   4   1 1136.60   34.59   9
   4  -4   1   14.66    1.98   8
  -4   4  -1    6.08    7.05  11
   4   4   1   13.73    3.08   8
   4  -4   1   11.50    6.15   1
  -4  -4  -1   15.33    2.36   6
   4   4   1   15.17    3.48   9
  -4   4  -1   11.45   15.28   7
  -4   4  -1   18.13    1.96  10
  -5   4  -1 1040.44   30.73  10
   5   4   1  978.72   32.15   9
   5  -4   1 1045.70   44.80   1
   5   4   1  997.91   34.87   8
   5  -4   1 1002.42   34.27   8
  -5   4  -1  991.89   36.39  11
  -5  -4  -1 1012.92   28.43   6
  -5   4  -1  989.67   45.01   7
  -6   4  -1   55.05    9.88   7
  -6   4  -1   65.83    3.16  10
  -6  -4  -1   70.46    3.82   6
   6  -4   1   64.10    3.71   8
   6   4   1   54.41    5.05   8
   6   4   1   58.35    5.07   9
   6  -4   1   61.11    7.47   1
   7  -4   1   86.44    8.45   1
   7   4   1   78.48    5.89   8
   7   4   1   90.48    5.66   9
  -7   4  -1   74.36   10.36   7
   7  -4   1   78.81    4.41   8
  -7  -4  -1   80.14    5.37  10
  -7   4  -1   78.53    3.81  10
  -8   4  -1   13.69    3.12  10
   8  -4   1   14.94    6.40   1
   8   4   1   15.11    4.77   8
   8   4   1   10.76    5.19   9
   8  -4   1   11.68    3.85   8
  -8  -4  -1   19.01    5.17  10
   9   4   1  217.94   10.82   8
  -9  -4  -1  218.74    9.42  10
   9  -4   1  227.43    9.39   8
   9  -4   1  233.06    9.61   9
  -9   4  -1  231.21    8.24  10
   9  -4   1  222.19   14.85   1
   9   4   1  214.84   10.57   9
  10  -4   1    9.76    4.72   8
  10  -4   1   28.28   11.02   1
 -10   4  -1   21.86    4.01  10
  10   4   1   20.11    5.76   8
  10   4   1   12.29    7.09   9
  10  -4   1   17.91    5.20   9
 -10  -4  -1   14.99    5.76  10
  11   4   1  437.82   17.65   8
  11  -4   1  451.85   16.05   9
  11   4   1  426.92   16.76   9
 -11  -4  -1  429.11   15.51  10
  12  -4   1    2.23    3.30   9
  12   4   1   -1.77    1.95   9
 -12  -4  -1    0.13    3.18  10
 -13  -4  -1  265.52   12.05  10
  13   4   1  287.27   13.81   9
  13  -4   1  329.53   12.97   9
  13   4   1  302.31   14.37   8
 -14  -4  -1   14.61    6.83  10
  14   4   1   14.08    6.75   8
  14  -4   1   13.96    6.13   9
 -14   4  -1   24.93   10.55  11
 -15   4  -1   90.25   12.76  11
  15   4   1   64.31   10.01   8
  15   4   1   83.84   10.63   9
 -15  -4  -1   75.21    8.20  10
  15  -4   1   82.67    9.50   9
 -16   4  -1   19.86   10.31  11
  16   4   1   15.60    7.79   9
  16   4   1   24.87    8.39   8
 -16  -4  -1   23.92    7.55  10
  17   4   1   11.63    9.06   8
 -17   4  -1   15.14   13.00  11
  17   4   1   29.21    9.74   9
  18   4   1   27.75   10.43   9
 -18   4  -1    8.49   13.19  11
  19   4   1    9.19   11.37   9
 -19   5   1    1.03    5.77  11
  19   5  -1   27.07   11.48   9
  18   5  -1   13.37   17.64   9
 -18   5   1   12.64   12.50  11
 -17   5   1   21.80   14.26  11
 -17  -5   1    3.74   12.57  10
  17   5  -1   16.70   13.90   8
  17   5  -1   10.07   14.59   9
 -16  -5   1   21.69    8.98  10
  16   5  -1   15.28    7.36   8
  16   5  -1   16.16   12.53   9
 -16   5   1   22.76   13.12  11
  15   5  -1    4.90   11.81   8
 -15  -5   1    2.81    4.55  10
 -15   5   1   15.40   13.20  11
  15   5  -1    9.38   14.14   9
  14   5  -1   74.76    8.98   8
  14   5  -1   71.98    8.61   9
 -14   5   1   68.44   12.29  11
 -14  -5   1   68.12    7.57  10
  13   5  -1   99.52    9.50   8
 -13  -5   1   87.66    7.49  10
 -13   5   1   83.11   11.03  11
  13   5  -1   97.96    8.47   9
  13  -5  -1   94.35    8.21   9
  12   5  -1    9.43    6.08   9
  12   5  -1    8.44    5.62   8
  12  -5  -1    7.93    9.70   9
 -12   5   1    8.35   13.02  11
 -12  -5   1   14.83    6.48  10
  11  -5  -1   67.47    6.28   9
 -11   5   1   91.82   13.28   7
  11   5  -1   58.29    8.24   8
 -11   5   1   51.05    9.80  11
  11   5  -1   58.28    8.16   9
 -11  -5   1   56.68    6.29  10
 -10   5   1   28.77   10.05  11
 -10   5   1   38.57   18.19   7
  10   5  -1   25.01    9.85   9
  10   5  -1   23.14    9.86   8
  10  -5  -1   42.50    6.00   9
 -10  -5   1   44.75    6.54  10
  -9   5   1    3.61    2.34  10
   9  -5  -1    2.83    3.94   9
  -9   5   1   -1.81    1.27   7
  -9   5   1    1.40    6.05  11
   9  -5  -1   16.65    8.36   1
   8  -5  -1  212.38   13.44   1
  -8   5   1  213.45   11.34  11
   8  -5  -1  213.49    8.24   8
   8  -5  -1  213.80    8.50   9
  -8   5   1  215.07   14.77   7
   8   5  -1  208.09   10.13   8
  -8   5   1  207.67    7.26  10
   8   5  -1  206.49    9.87   9
   8   5  -1  205.38    9.37  12
   7  -5  -1  112.21    5.36   9
  -7   5   1  107.46    8.20  11
   7  -5  -1  107.67    4.85   8
  -7   5   1  113.49    4.28  10
  -7   5   1  105.18   11.28   7
   7   5  -1  114.15    6.74   9
   7  -5  -1  131.31    9.32   1
   7   5  -1  111.87    7.08   8
  -6   5   1  203.64    9.87  11
  -6   5   1  209.65   12.51   7
   6  -5  -1  199.19    7.37   8
   6   5  -1  211.70    8.53   9
   6  -5  -1  205.43   11.96   1
   6   5  -1  215.10    8.97   8
  -6   5   1  200.32    6.60  10
   5  -5  -1  298.47   11.52   8
  -5   5   1  341.48   13.65  11
   5   5  -1  354.21   11.94   9
  -5   5   1  335.73   16.88   7
   5  -5  -1  351.47   16.68   1
  -5   5   1  343.81   13.09  12
   5   5  -1  348.58   12.79   8
  -4   5   1  241.93   12.99   7
  -4   5   1  269.36   10.19  12
  -4   5   1  253.27   10.67  11
  -4   5   1  252.02   10.56   3
   4   5  -1  265.57    9.95   8
   4  -5  -1  259.07   12.94   1
   4   5  -1  262.26    9.21   9
   4   5  -1  242.66   10.20   3
  -3   5   1   25.61    4.54   3
   3  -5  -1   20.62    5.11   1
   3   5  -1   24.61    3.04   9
  -3   5   1   20.21    3.53  11
  -3  -5   1   25.88    1.96   6
  -3   5   1   19.53    5.95   7
   3   5  -1   24.88    3.32   8
  -3   5   1   23.52    2.53  12
   3   5  -1   20.17    3.48   3
  -2   5   1   41.12    5.01  11
  -2  -5   1   51.31    3.80   2
  -2  -5   1   43.80    2.04   6
   2   5  -1   46.76    3.56   3
   2   5  -1   42.55    3.11   9
  -2   5   1   38.54    6.02   7
  -2   5   1   42.30    4.36   3
   2   5  -1   37.31    3.55   8
  -1  -5   1    5.12   15.35   2
  -1   5   1   10.09    2.54  11
  -1   5   1    8.21    3.52   7
   1   5  -1    3.33    2.86   8
  -1   5   1    5.80    1.36   9
   1   5  -1   12.43    2.62  12
   1   5  -1    3.81    2.71   9
  -1   5   1    2.62    3.80   3
  -1  -5   1    6.06    1.05   6
  -1   5   1    5.97    1.97   8
   1   5  -1    6.75    3.00  11
   1   5  -1    7.16    2.42   3
   0   5   1    7.89    1.96   9
   0   5   1    8.57    2.82   3
   0   5  -1    5.81    1.81   8
   0   5   1   12.39    1.82   8
   0   5  -1    5.83    4.43  12
   0   5  -1    4.23    4.57   3
   0  -5  -1    6.11    1.71   5
   0   5  -1    6.65    2.08   9
   0   5   1    1.09   14.16  11
   0   5   1    2.68    5.55   7
   0  -5  -1    4.73    1.53   6
   0   5  -1    6.32   18.05  11
   1   5   1  336.50   10.67   9
  -1   5  -1  328.53   10.43   9
   1  -5   1  317.08   12.69   4
  -1  -5  -1  323.64   11.20   2
  -1   5  -1  343.37   12.81  12
  -1   5  -1  315.58   12.40  11
   1   5   1  303.77   12.42  11
   1   5   1  330.19   11.62   8
  -1  -5  -1  329.78    9.35   6
  -1   5  -1  339.44   11.30   8
   1   5   1  333.62   12.13   3
  -1   5  -1  309.38   14.88   7
  -1   5  -1  307.16   12.04   3
  -1  -5  -1  326.26    9.12   5
   2  -5   1  681.67   27.27   4
  -2  -5  -1  694.54   22.84   2
  -2  -5  -1  722.23   19.89   6
  -2   5  -1  702.32   25.55  11
   2   5   1  724.08   22.54   9
  -2   5  -1  696.63   25.14   3
  -2   5  -1  725.22   26.72  12
   2   5   1  728.63   24.55   8
   2   5   1  716.66   25.03   3
  -2   5  -1  690.12   31.48   7
  -3   5  -1  428.71   20.37   7
  -3   5  -1  436.34   16.92  12
   3   5   1  440.95   15.76   8
  -3   5  -1  437.36   16.57  11
  -3  -5  -1  445.62   12.64   6
   3   5   1  450.89   14.50   9
   3   5   1  442.66   16.20   3
   4  -5   1  444.30   19.31   1
   4  -5   1  369.97   13.85   8
  -4  -5  -1  420.70   11.82   6
  -4   5  -1  403.80   19.26   7
  -4   5  -1  397.79   15.59  11
  -4   5  -1  399.16   12.47  10
   4   5   1  397.34   14.76   8
   4   5   1  397.07   15.47   3
   4   5   1  423.19   13.65   9
  -5  -5  -1    1.08    1.14   6
   5   5   1    7.61    3.44   8
  -5   5  -1    4.30    1.59  10
   5   5   1    4.44    4.51   9
   5  -5   1    1.02    2.57   8
  -6  -5  -1  194.93    6.51   6
  -6   5  -1  179.81    9.78  11
   6  -5   1  179.24    7.05   8
  -6   5  -1  176.20   11.89   7
   6   5   1  191.66    8.07   9
  -6   5  -1  190.62    6.47  10
   6   5   1  187.23    8.43   8
   6  -5   1  192.14   11.52   1
  -7   5  -1   56.80    8.37  11
   7  -5   1   67.36    9.09   1
   7   5   1   66.19    6.03   8
  -7   5  -1   59.26    3.64  10
   7  -5   1   61.09    3.85   8
   7   5   1   53.24    6.70   9
  -7  -5  -1   67.57    5.12  10
  -7   5  -1   45.24   14.47   7
   8   5   1    2.38   11.21   8
  -8  -5  -1   -2.26    5.17  10
   8  -5   1   11.38    6.93   1
   8  -5   1   -0.82    3.49   8
  -9   5  -1  351.00   16.59  11
   9  -5   1  363.36   13.28   9
   9   5   1  385.87   15.08   8
   9   5   1  362.86   14.28   9
  -9  -5  -1  363.50   13.32  10
   9  -5   1  362.89   20.17   1
  -9   5  -1  338.47   12.02  10
   9  -5   1  372.14   13.53   8
 -10  -5  -1  201.88    9.26  10
 -10   5  -1  187.11   12.23  11
  10  -5   1  185.42    9.22   9
  10   5   1  184.50   10.57   9
  10  -5   1  196.10   15.22   1
  10   5   1  199.35   10.73   8
  11   5   1   25.84    8.42   8
 -11   5  -1    2.95   28.88  11
  11   5   1   17.77    6.28   9
  11  -5   1   31.19    6.01   9
  11  -5   1   28.07   11.16   1
 -11  -5  -1   27.12    6.66  10
  12   5   1  176.23   10.94   8
  12  -5   1  165.74    9.36   9
 -12   5  -1  169.24   12.41  11
 -12  -5  -1  178.45    9.04  10
  12   5   1  161.15   10.66   9
  13  -5   1   28.03    7.86   9
 -13   5  -1   20.78   12.23  11
 -13  -5  -1   36.55    6.71  10
  13   5   1   22.41    8.78   8
  13   5   1   17.30   10.00   9
 -14  -5  -1   55.17    7.33  10
  14   5   1   70.53    9.58   8
 -14   5  -1   67.26   11.97  11
  14   5   1   68.85   10.26   9
  14  -5   1   59.09    8.50   9
  15   5   1   76.36   11.04   9
 -15  -5  -1   62.48    8.37  10
  15   5   1   62.37   10.08   8
 -15   5  -1   56.03   12.87  11
  16   5   1   17.82    8.78   8
  16   5   1   31.12    9.11   9
 -16  -5  -1   16.50    8.32  10
  17   5   1   26.07   11.01   8
 -17   5  -1   31.37   12.63  11
 -17  -5  -1   10.22    7.96  10
  17   5   1   42.71    9.04   9
  18   5   1    9.92    7.60   9
 -18   6   1   -0.30    3.51  11
  18   6  -1    2.41   29.53   8
  18   6  -1    7.61    9.44   9
 -17   6   1   47.36   13.11  11
  17   6  -1   41.53   11.30   9
 -17  -6   1   37.87    9.35  10
  17   6  -1   45.01   10.53   8
 -16   6   1    0.47    9.89  11
  16   6  -1   18.67    9.68   8
 -15  -6   1  116.04    9.02  10
  15   6  -1  120.54   10.65   8
  15   6  -1  106.12   10.51   9
 -15   6   1  109.78   12.91  11
 -14   6   1   14.31   10.85  11
  14   6  -1    5.09    6.91   8
  14   6  -1    6.57    4.51   9
 -14  -6   1   16.60    8.30  10
 -13  -6   1   38.44    7.34  10
  13   6  -1   34.87    7.58   9
  13   6  -1   35.84    8.94   8
 -13   6   1   37.87   10.55  11
  12   6  -1   40.13    8.49   8
  12  -6  -1   19.43    6.44   9
 -12  -6   1   11.36    7.45  10
  12   6  -1   20.48    7.02   9
 -12   6   1    2.42    7.59  11
 -11  -6   1   42.98    6.39  10
 -11   6   1   51.35   15.51   7
  11   6  -1   12.20   10.54   8
 -11   6   1   10.70    6.27  11
  11  -6  -1   24.02    6.31   9
  11   6  -1   25.44    6.08   9
  10   6  -1   25.06    8.68   8
  10  -6  -1    5.56    4.94   9
  10  -6  -1   24.60    9.00   1
 -10  -6   1   10.98    7.54  10
 -10   6   1   13.04   11.29  11
  -9   6   1  210.91   15.70   7
   9   6  -1  205.49   11.06   8
   9   6  -1  196.67   10.60   9
   9  -6  -1  228.29    8.97   9
   9   6  -1  212.25    9.90  12
   9  -6  -1  232.16   14.99   1
  -9   6   1  206.94   12.44  11
  -8   6   1   58.57    8.96  11
   8   6  -1   54.88    6.87   9
   8  -6  -1   78.84   10.05   1
  -8   6   1   49.88   11.87   7
   8   6  -1   54.36    7.18   8
   8   6  -1   68.25    5.84  12
  -8   6   1   57.94    3.33  10
   8  -6  -1   72.61    5.20   9
   8  -6  -1   60.23    3.69   8
  -7   6   1  626.38   20.51  10
   7  -6  -1  685.26   21.57   9
   7   6  -1  704.34   22.49   9
   7  -6  -1  615.69   22.82   8
  -7   6   1  685.70   31.44   7
  -7   6   1  679.91   25.35  11
   7  -6  -1  665.16   31.25   1
   7   6  -1  705.83   24.31   8
   6   6  -1   83.70    5.61   9
  -6   6   1   89.25    6.88  11
   6  -6  -1   92.35    7.87   1
  -6   6   1   79.81    9.38   7
   6   6  -1   90.46    5.89   8
   6  -6  -1   68.25    2.89   8
  -5   6   1  181.09    9.04  11
   5   6  -1  176.20    8.74   3
   5   6  -1  190.11    7.60   9
  -5   6   1  180.97   11.32   7
   5   6  -1  188.35    8.22   8
   5  -6  -1  191.46   10.87   1
  -5   6   1  184.46    7.91  12
   4   6  -1    9.11    3.37   9
   4   6  -1    8.40    2.67   3
  -4   6   1    5.36   15.87   3
  -4  -6   1    8.60    1.91   6
  -4   6   1    3.46    7.67   7
   4   6  -1    6.22    5.11   8
  -4   6   1    6.07    3.01  12
   4  -6  -1    1.48   12.62   1
  -4   6   1    7.87    3.96  11
   3   6  -1    4.43    6.87   8
  -3  -6   1    8.23    1.96   6
  -3   6   1    3.11    8.42   3
   3   6  -1    7.95    2.63   9
   3   6  -1   10.34    3.77   3
  -3   6   1    4.52    5.41  11
  -3   6   1   12.18    2.68  12
  -3   6   1    7.98    4.56   7
  -2  -6   1  145.04    4.33   6
   2   6  -1  148.71    6.08   3
   2   6  -1  144.62    5.51   9
   2   6  -1  143.36    6.10   8
  -2   6   1  147.70    7.16  11
  -2   6   1  133.19    8.44   7
  -2  -6   1  144.14    6.18   2
  -2   6   1  140.41    6.59   3
  -2   6   1  134.01    5.05   8
  -1  -6   1  651.55   18.75   6
   1   6  -1  688.29   21.40   9
  -1  -6   1  656.81   21.72   2
  -1   6   1  688.56   21.11   9
   1   6  -1  689.29   25.63  12
   1   6  -1  696.71   23.31   8
   1   6  -1  676.53   23.73   3
  -1   6   1  676.08   24.06   3
  -1   6   1  668.81   29.91   7
  -1   6   1  693.56   23.04   8
  -1   6   1  664.20   24.40  11
   1   6  -1  646.62   24.30  11
   0   6   1  405.25   15.41  11
   0   6  -1  415.21   15.93  12
   0  -6   1  397.88   11.45   6
   0  -6  -1  410.92   11.65   6
   0   6   1  404.82   14.93   3
   0   6  -1  414.31   14.25   8
   0   6   1  408.56   18.26   7
   0   6  -1  417.23   13.09   9
   0  -6  -1  399.02   11.42   5
   0   6  -1  388.19   14.79   3
   0   6  -1  414.79   15.38  11
   0   6   1  425.23   14.28   8
   0   6   1  409.91   13.04   9
   1   6   1  940.91   35.19  11
   1  -6   1  989.35   37.70   4
   1   6   1 1024.98   33.81   8
  -1   6  -1 1029.99   33.57   8
   1   6   1 1002.27   34.61   3
  -1   6  -1  964.99   43.30   7
  -1  -6  -1  952.28   31.42   2
  -1  -6  -1 1000.92   27.55   6
  -1   6  -1  970.24   35.19  11
  -1   6  -1  963.32   34.60   3
   1   6   1  999.46   31.01   9
  -1  -6  -1  987.68   27.15   5
  -1   6  -1  999.20   37.03  12
  -1   6  -1 1006.98   30.88   9
  -2  -6  -1  380.53   13.33   2
  -2   6  -1  386.46   14.54   3
   2   6   1  394.49   14.40   3
  -2   6  -1  404.33   15.31  12
   2   6   1  402.89   14.07   8
   2   6   1  403.67   12.90   9
  -2   6  -1  389.55   14.91  11
  -2   6  -1  373.18   18.04   7
   2  -6   1  392.13   15.38   4
  -2  -6  -1  379.64   10.90   5
  -2  -6  -1  403.91   11.22   6
  -3   6  -1   86.98    5.86   3
  -3   6  -1   92.52    5.18  12
  -3   6  -1   86.33    7.27   7
  -3   6  -1   93.60    5.85  11
  -3  -6  -1  100.23    5.27   2
   3   6   1  101.54    5.03   8
  -3  -6  -1   97.11    3.49   6
   3   6   1   94.32    4.61   9
   3   6   1   91.14    5.31   3
   4   6   1   19.47    4.37   9
  -4   6  -1   26.75    4.75  11
   4  -6   1   13.72    1.21   8
  -4   6  -1   12.52   17.03   7
  -4  -6  -1   23.77    2.47   6
  -4   6  -1   24.60    3.33  12
   4   6   1   23.64    4.08   8
   4   6   1   25.62    5.22   3
   5   6   1  126.82    6.44   8
  -5  -6  -1  129.14    4.53   6
   5   6   1  124.22    6.22   9
   5  -6   1  104.14    4.27   8
  -5   6  -1  104.94    3.86  10
   5  -6   1  118.68    8.89   1
   5   6   1  114.85    8.18   3
  -5   6  -1  117.99    9.59   7
  -5   6  -1  121.04    7.42  11
   6  -6   1   45.25    2.56   8
  -6   6  -1   42.52    6.34  11
  -6   6  -1   36.94   10.60   7
   6  -6   1   46.94    8.00   1
  -6   6  -1   44.76    2.82  10
   6   6   1   35.25    6.09   9
  -6  -6  -1   44.84    3.48   6
   6   6   1   51.60    5.65   8
   7  -6   1   53.22    9.25   1
  -7   6  -1   55.09    3.41  10
  -7  -6  -1   55.67    5.76  10
  -7   6  -1   52.96    8.80  11
   7   6   1   51.23    6.38   9
   7  -6   1   56.57    3.40   8
   7   6   1   53.27    6.17   8
  -7   6  -1   42.22   14.56   7
  -8   6  -1  363.65   16.56  11
  -8   6  -1  374.21   12.22  10
   8  -6   1  371.63   13.47   8
   8   6   1  379.97   14.41   9
   8  -6   1  378.24   20.28   1
  -8  -6  -1  385.77   13.46  10
   8   6   1  369.27   15.21   8
   9   6   1   26.36    7.38   8
  -9   6  -1   18.84    8.82  11
   9   6   1   35.09    7.74   9
  -9  -6  -1   25.32    6.37  10
   9  -6   1   41.96    9.89   1
  10  -6   1  343.32   20.46   1
  10   6   1  359.25   14.58   9
  10   6   1  357.51   15.25   8
  10  -6   1  370.41   13.31   9
 -10  -6  -1  336.58   13.34  10
 -10   6  -1  366.45   16.75  11
  11   6   1    4.56    7.65   9
  11   6   1    6.58    5.38   8
  11  -6   1    3.84    5.02   9
 -11  -6  -1    5.86    3.64  10
 -11   6  -1    7.07   10.65  11
  11  -6   1   18.66    9.54   1
  12   6   1    2.81    6.10   8
 -12   6  -1    8.44    8.67  11
  12  -6   1   20.46    7.39   9
 -12  -6  -1   16.38    6.31  10
  12   6   1   33.33    8.12   9
  13   6   1    0.40   10.40   8
  13  -6   1    5.76    8.66   9
 -13  -6  -1    5.49   10.48  10
  13   6   1   18.45    6.20   9
 -14  -6  -1   39.66    8.09  10
  14   6   1   43.42    9.09   8
  14   6   1   36.20    8.98   9
 -14   6  -1   47.49   10.76  11
  15   6   1   37.99   10.22   8
  15   6   1   67.75   10.83   9
 -15  -6  -1   67.15    8.50  10
 -15   6  -1   56.13   12.87  11
 -16  -6  -1   48.64    8.85  10
  16   6   1   54.54   11.39   8
  16   6   1   73.88   11.11   9
 -16   6  -1   56.30   13.10  11
  17   6   1   15.70    9.15   8
  17   6   1   33.02   12.47   9
 -17   6  -1   42.24   14.12  11
 -17  -6  -1    5.35    8.46  10
 -18   6  -1   13.60   13.48  11
  18   6   1    8.06    9.96   8
  18   6   1   17.06   11.05   9
 -18  -6  -1   14.60    9.35  10
  19   7  -1    7.43   11.28   8
 -19  -7   1    1.90    4.91  10
  18   7  -1    6.76   10.73   8
  18   7  -1   11.65   11.40   9
 -18  -7   1    1.18   20.99  10
 -17  -7   1    2.39   32.47  10
 -17   7   1    2.45   16.49  11
  17   7  -1   32.06   11.83   9
  17   7  -1    6.74    9.10   8
  16   7  -1   70.25   10.13   8
  16   7  -1   49.69   10.96   9
 -16   7   1   66.33   13.51  11
 -16  -7   1   54.23    9.50  10
  15   7  -1   30.43    9.58   8
 -15   7   1   33.89   12.26  11
 -15  -7   1   24.53    9.33  10
  15   7  -1   21.50    9.18   9
  14   7  -1  136.92   10.40   9
 -14  -7   1  134.15    9.24  10
  14   7  -1  111.01   11.13   8
 -14   7   1  138.69   12.18  11
  13   7  -1   89.11   10.35   8
 -13  -7   1   52.89    7.57  10
  13   7  -1   75.71    8.87   9
 -13   7   1   78.88   11.05  11
 -12   7   1   32.69    9.83  11
  12   7  -1    6.70   29.67   8
  12   7  -1   24.91    6.74   9
 -12  -7   1   22.19    6.77  10
  11   7  -1  134.35    9.08   9
 -11   7   1  119.86   10.54  11
 -11  -7   1  118.70    7.98  10
  11  -7  -1  115.89   13.59   1
  11  -7  -1  107.97    7.17   9
  11   7  -1  114.92    9.25   8
 -10   7   1   92.92    9.78  11
 -10   7   1  120.84   13.81   7
  10   7  -1   95.56    7.89   9
  10   7  -1   89.02    8.62   8
  10   7  -1   95.23    6.97  12
 -10  -7   1  104.02    7.27  10
  10  -7  -1  112.22   12.05   1
  10  -7  -1  100.15    6.29   9
   9   7  -1   40.38    7.69   9
   9  -7  -1   42.01    9.67   1
   9  -7  -1   26.51    5.70   9
  -9   7   1   71.72   16.60   7
   9   7  -1   19.86    8.01   8
  -9   7   1   30.31    9.73  11
   9   7  -1   23.76    5.95  12
   8  -7  -1  449.42   15.41   9
  -8   7   1  461.48   18.93  11
   8  -7  -1  434.60   23.34   1
   8   7  -1  457.69   18.49  12
   8   7  -1  466.37   17.99   8
   8   7  -1  460.76   16.59   9
  -8   7   1  477.76   23.82   7
  -7   7   1   23.86    7.98  11
   7  -7  -1   20.92    3.71   9
   7   7  -1   16.80    5.78   9
  -7   7   1   24.95   12.49   7
   7  -7  -1   23.18    7.87   1
   7   7  -1    7.23    9.85   3
   7   7  -1   24.14    6.76   8
  -6   7   1  150.41   11.18   7
   6   7  -1  142.48    7.89   8
  -6   7   1  156.53    8.68  11
   6   7  -1  144.54    8.16   3
  -6   7   1  149.10    7.02  12
   6   7  -1  150.41    7.10   9
   6  -7  -1  141.71   10.46   1
   5   7  -1  121.89    6.50   3
  -5   7   1  111.04    9.92   7
   5  -7  -1  115.68    9.01   1
   5   7  -1  115.98    6.79   8
  -5   7   1  124.65    6.10  12
   5   7  -1  128.59    6.07   9
  -5   7   1  107.16    7.58   3
  -5   7   1  116.34    7.56  11
  -4   7   1   20.09    5.94   3
   4  -7  -1   11.94    8.95   1
   4   7  -1   19.50    4.78   8
  -4  -7   1   23.41    2.52   6
   4   7  -1   22.83    4.31   3
   4   7  -1   21.12    3.94   9
  -4   7   1   15.89   12.25   7
  -4   7   1   20.50    4.00  12
  -4   7   1   19.34    6.35  11
  -3  -7   1  590.88   19.84   2
  -3   7   1  556.72   27.19   7
   3   7  -1  627.98   21.27   8
   3   7  -1  604.57   21.34   3
  -3   7   1  584.13   21.90   3
  -3   7   1  611.86   22.96  12
  -3   7   1  601.29   22.32  11
  -3  -7   1  615.48   16.94   6
   3   7  -1  607.99   19.47   9
  -2  -7   1  554.71   15.49   6
   2   7  -1  567.66   19.45   8
  -2  -7   1  556.37   18.22   2
  -2   7   1  549.88   24.93   7
   2   7  -1  572.24   17.83   9
   2  -7  -1  543.26   16.91  10
   2   7  -1  557.45   21.32  12
  -2   7   1  530.05   20.04   3
  -2   7   1  533.74   20.42  11
  -2   7   1  544.80   18.82   8
   2   7  -1  554.54   19.63   3
   1   7  -1 1142.01   35.55   9
  -1  -7   1 1101.37   35.91   2
  -1   7   1 1146.07   35.30   9
   1   7  -1 1186.91   38.73   8
   1   7  -1 1140.54   39.49   3
  -1   7   1 1124.13   39.75   3
  -1   7   1 1132.31   49.67   7
  -1  -7   1 1080.54   31.38   6
   1   7  -1 1130.66   42.46  12
  -1   7   1 1159.53   38.45   8
  -1   7   1 1132.57   40.40  11
   1   7  -1 1102.88   40.25  11
   0   7   1  193.12    8.72  11
   0   7  -1  190.68    7.26   8
   0   7  -1  200.94    6.69   9
   0   7   1  193.37    9.42   7
   0   7   1  202.18    7.36   8
   0  -7  -1  190.25    5.95   6
   0   7  -1  189.91    8.71  11
   0  -7   1  194.47    5.65   6
   0   7   1  195.35    8.22   3
   0   7  -1  186.50    8.04   3
   0   7   1  198.75    6.63   9
   0  -7  -1  191.48    5.71   5
   0   7  -1  191.11    8.59  12
   1   7   1  182.93    6.53   9
  -1  -7  -1  188.62    7.44   2
  -1   7  -1  192.77    6.27   9
  -1   7  -1  191.14    6.85   8
   1  -7   1  182.44    7.40   4
  -1   7  -1  172.00    9.27   7
  -1   7  -1  177.27    8.24  11
  -1   7  -1  191.13    8.31  12
   1   7   1  183.31    7.31   8
  -1  -7  -1  187.61    5.63   6
   1   7   1  176.67    8.25  11
  -1   7  -1  184.20    7.82   3
   1   7   1  187.51    7.82   3
  -1  -7  -1  178.25    5.35   5
   2   7   1   18.37    3.42   8
  -2  -7  -1   22.83    4.03   2
  -2   7  -1   24.53    5.29  11
  -2  -7  -1   19.81    1.31   5
  -2   7  -1   23.44    3.88  12
   2  -7   1   22.69    3.04   4
   2   7   1   26.52    4.21   3
  -2   7  -1   15.01    7.49   7
   2   7   1   21.25    2.91   9
  -2  -7  -1   21.39    2.13   6
  -2   7  -1   21.04    4.85   3
   3   7   1    4.79   10.16   3
  -3   7  -1    3.23   15.37  12
   3   7   1    2.52    2.97   9
  -3  -7  -1    5.56    2.40   6
   3   7   1    0.78  182.62   8
  -3   7  -1    4.00   69.25   3
  -3   7  -1    0.65    1.30  11
  -3  -7  -1    7.00    4.96   2
  -4   7  -1  332.01   14.13  11
   4   7   1  358.59   12.33   9
  -4  -7  -1  361.90   10.40   6
   4   7   1  365.12   13.34   8
  -4   7  -1  334.55   17.27   7
  -4   7  -1  355.54   14.04  12
   4   7   1  344.45   13.53   3
   5   7   1  239.89   10.14   8
   5  -7   1  244.68   13.58   1
  -5   7  -1  224.52   13.67   7
   5   7   1  234.03   10.58   3
  -5  -7  -1  250.39    7.66   6
  -5   7  -1  237.53   10.90  11
   5   7   1  252.16    9.52   9
   6  -7   1   97.76    4.15   8
  -6  -7  -1  137.71    4.95   6
   6   7   1  121.99    8.89   3
  -6   7  -1   98.84    3.71  10
   6   7   1  135.91    6.72   9
  -6   7  -1  104.63   11.05   7
   6   7   1  146.32    7.31   8
   6  -7   1  126.58   10.08   1
  -6   7  -1  128.51    8.31  11
   7   7   1   47.89   11.04   3
  -7   7  -1   63.92    8.52  11
  -7  -7  -1   66.63    5.83  10
   7  -7   1   52.37    2.83   8
   7   7   1   63.69    6.76   9
  -7  -7  -1   63.20    4.32   6
   7  -7   1   70.52    9.79   1
  -7   7  -1   53.21   12.11   7
  -7   7  -1   45.75    2.93  10
   7   7   1   59.54    6.59   8
  -8  -7  -1    0.38   20.51  10
   8  -7   1    4.51   10.80   1
  -8   7  -1    8.00    8.32  11
  -9  -7  -1   11.92    6.32  10
   9   7   1    8.96    5.28   8
  -9   7  -1    7.36    7.50  11
   9  -7   1   27.65   11.03   1
  10   7   1   50.66    7.93   9
  10   7   1   43.76    7.84   8
  10  -7   1   55.35    6.15   9
 -10   7  -1   48.11   10.42  11
  10  -7   1   62.79   11.76   1
 -10  -7  -1   49.76    6.60  10
 -11   7  -1   43.04   11.15  11
  11  -7   1   54.73   12.81   1
 -11  -7  -1   34.47    6.33  10
  11   7   1   41.65    7.77   9
  11   7   1   43.71    8.31   8
  11  -7   1   45.88    6.21   9
 -12  -7  -1    8.61    8.09  10
  12   7   1   25.55    8.83   9
 -12   7  -1   21.85   10.12  11
  12  -7   1   47.16   12.58   1
  12   7   1   15.25    9.98   8
  13   7   1   16.82    8.75   9
 -13   7  -1   11.13   10.22  11
  13   7   1   18.83    9.41   8
 -13  -7  -1   18.12    8.37  10
 -14  -7  -1    3.55    5.14  10
  14   7   1    2.82    6.12   8
 -14   7  -1   14.13   10.07  11
  15   7   1    7.23    8.83   9
 -15   7  -1   18.69   11.28  11
  15   7   1   10.82   12.38   8
 -16  -7  -1   10.54    8.17  10
  16   7   1   14.84   12.09   9
  16   7   1   12.11    9.88   8
 -16   7  -1   19.96   12.05  11
  17   7   1   10.12   10.31   9
 -17  -7  -1   18.01    8.76  10
 -17   7  -1   31.17   13.43  11
  17   7   1   21.69    9.42   8
  18   7   1   10.81   13.44   8
 -18  -7  -1    5.96    7.48  10
 -18   7  -1   -1.43   15.63  11
  18   7   1   21.72   14.29   9
 -19  -7  -1   23.64   11.31  10
  18   8  -1   36.31   11.05   9
 -18  -8   1   14.25   10.31  10
  18   8  -1   11.91    9.55   8
 -18   8   1   12.81   11.17  11
 -17   8   1    8.90   10.46  11
  17   8  -1   36.61   10.81   9
  17   8  -1   28.11   11.87   8
 -17  -8   1    8.05   18.70  10
 -16   8   1    9.71   10.35  11
  16   8  -1   12.10    7.90   8
 -16  -8   1   14.28    7.67  10
  15   8  -1   33.61    8.40   9
 -15  -8   1   42.32    9.02  10
  15   8  -1   55.81   10.59   8
 -15   8   1   11.66   10.45  11
 -14  -8   1   73.94    8.30  10
 -14   8   1   79.93   11.22  11
  14   8  -1   57.05   10.05   8
  14   8  -1   59.10    9.41   9
 -13  -8   1   12.91    7.09  10
  13   8  -1   19.82    8.14   9
 -13   8   1   24.01    9.56  11
  13   8  -1    8.57    6.98   8
 -12  -8   1  532.45   18.71  10
  12   8  -1  505.84   19.63   9
  12   8  -1  515.33   21.25   8
 -12   8   1  532.69   22.37  11
 -11   8   1    4.70    8.14  11
  11  -8  -1   27.12   10.50   1
  11   8  -1   -1.22    5.19   8
  11   8  -1    2.01    1.86   9
 -11  -8   1    6.34    6.70  10
 -10   8   1  219.17   12.44  11
  10  -8  -1  215.78   15.68   1
  10   8  -1  220.13   10.71  12
  10   8  -1  231.12   10.75   9
 -10  -8   1  209.68    9.94  10
  10   8  -1  222.68   11.51   8
 -10   8   1  203.63   15.93   7
   9   8  -1    7.37   11.66  12
   9   8  -1   20.64    7.21   8
   9  -8  -1   12.16    4.63   9
   9   8  -1   19.11    6.27   9
   9  -8  -1   24.18    8.71   1
  -9   8   1   73.39   18.52   7
  -9   8   1   14.20    7.76  11
   8   8  -1   15.16    6.36  12
   8   8  -1   14.96    5.80   9
   8  -8  -1   28.49    9.46   1
  -8   8   1    7.17   31.21  11
   8   8  -1    4.42   92.56   8
   8   8  -1    8.93   38.86   3
   8  -8  -1   13.84    4.85   9
  -8   8   1    8.17  894.67   7
   7   8  -1   19.08    5.70   9
   7   8  -1   13.62    4.82  12
   7  -8  -1   17.57    3.26   9
   7   8  -1   10.40    5.69   8
   7  -8  -1   17.64    8.22   1
   7   8  -1   10.39    7.34   3
  -7   8   1   39.03   12.12   7
  -7   8   1   19.71    6.31  11
   6   8  -1  859.14   30.02   8
  -6   8   1  824.63   31.20  11
   6  -8  -1  835.86   38.54   1
   6   8  -1  821.98   30.11   3
  -6   8   1  835.15   38.56   7
  -6   8   1  878.95   31.93  12
   6   8  -1  838.40   27.53   9
  -5   8   1   74.83    7.64  11
  -5   8   1   82.40    5.39  12
   5   8  -1   68.17    5.96   8
  -5   8   1   77.56    6.97   3
   5   8  -1   80.52    5.14   9
   5   8  -1   79.54    5.60   3
  -5   8   1   75.98    9.09   7
   5  -8  -1   77.86    8.62   1
   4   8  -1  505.91   18.26   3
  -4   8   1  493.85   18.97   3
  -4   8   1  502.35   19.60  12
   4   8  -1  503.86   16.77   9
   4   8  -1  505.09   18.33   8
   4  -8  -1  530.39   23.68   1
  -4   8   1  493.13   19.40  11
  -4   8   1  473.54   23.45   7
  -4  -8   1  521.40   14.45   6
  -3   8   1  140.10    9.24   7
  -3  -8   1  150.28    7.13   2
  -3   8   1  144.12    8.15  11
   3   8  -1  146.34    6.20   9
   3   8  -1  149.97    6.93   8
  -3   8   1  148.08    7.90   3
  -3   8   1  149.70    7.18  12
   3   8  -1  154.15    6.85   3
  -3  -8   1  160.92    4.83   6
  -2   8   1  388.94   15.62  11
  -2   8   1  395.50   15.22   3
   2   8  -1  377.17   15.45  11
  -2   8   1  405.06   13.95   8
  -2   8   1  411.93   16.03  12
  -2  -8   1  399.39   13.95   2
   2  -8  -1  403.27   12.57  10
   2   8  -1  409.81   16.18  12
  -2   8   1  388.60   18.74   7
   2   8  -1  409.61   14.76   3
   2   8  -1  417.42   14.69   8
  -2   8   1  400.54   12.79   9
   2   8  -1  427.57   13.42   9
  -2  -8   1  404.28   11.42   6
   1   8  -1  387.14   14.15   3
  -1  -8   1  358.93   10.66   6
  -1  -8   1  377.71   13.08   2
   1   8  -1  379.97   15.39  12
   1   8  -1  387.49   13.71   8
   1   8  -1  394.04   12.52   9
  -1   8   1  366.57   14.57   3
  -1   8   1  377.03   13.34   8
  -1   8   1  384.95   15.11  11
   1   8  -1  387.21   14.74  11
  -1   8   1  371.16   17.57   7
  -1   8   1  382.76   12.15   9
   0   8   1   18.48    2.58   9
   0  -8  -1   17.73    2.12   5
   0   8  -1   22.49    4.02  12
   0   8  -1   23.19    2.44   9
   0   8   1   21.72    5.33   3
   0   8   1   25.99    4.97  11
   0   8  -1   22.15    6.61  11
   0   8  -1   23.71    2.83   8
   0   8  -1   17.63    5.67   3
   0  -8   1   19.29    1.64   6
   0   8   1   15.74    5.11   7
   0   8   1   17.68    3.19   8
   0  -8  -1   22.68    2.47   6
   1   8   1   40.10    5.61  11
  -1   8  -1   45.17    5.07  11
  -1   8  -1   44.98    4.81  12
  -1   8  -1   46.55    2.61   9
  -1  -8  -1   43.29    2.49   6
  -1   8  -1   32.88    5.50   7
   1   8   1   40.61    3.66   7
  -1   8  -1   43.38    5.24   3
   1   8   1   39.52    3.15   9
  -1  -8  -1   40.50    1.88   5
   1   8   1   40.93    3.94   8
  -1  -8  -1   42.49    4.84   2
  -1   8  -1   44.48    2.97   8
   1  -8   1   40.76    2.64   4
   1   8   1   40.86    4.54   3
  -2  -8  -1    5.54    1.05   5
  -2   8  -1    6.03    3.62  11
   2   8   1    6.72    6.96   3
  -2  -8  -1    9.36    3.94   2
  -2   8  -1    4.20   31.00   3
  -2  -8  -1    5.28    2.24   6
   2  -8   1    6.71    2.38   4
  -2   8  -1    4.09    4.18  12
   2   8   1    1.62    2.20   9
  -3  -8  -1  205.76    6.32   6
  -3   8  -1  201.50    9.39   3
  -3   8  -1  206.14    9.15  12
   3   8   1  197.09    8.84   3
   3   8   1  206.43    8.56   8
  -3  -8  -1  200.24    8.66   2
  -3   8  -1  204.44    9.76  11
  -3   8  -1  190.54   11.09   7
   3   8   1  211.29    7.76   9
   4   8   1   24.21    5.13   3
  -4   8  -1   13.04   11.01   7
   4   8   1   16.09    5.37   8
   4   8   1   23.44    4.50   9
  -4  -8  -1   27.60    2.66   6
  -4   8  -1   19.29   15.76  11
  -4   8  -1   16.43    4.57  12
  -5   8  -1  332.18   17.66   7
   5   8   1  349.81   12.55   9
   5  -8   1  350.67   17.83   1
  -5  -8  -1  352.43   10.41   6
  -5   8  -1  327.60   14.32  11
   5   8   1  352.67   13.50   8
  -5   8  -1  338.56   13.99  12
   5   8   1  349.63   13.76   3
   6   8   1    0.56    1.64   9
  -6  -8  -1    7.99    4.28   6
   6   8   1    2.15   24.73   8
  -6   8  -1    7.94    5.35  11
  -7  -8  -1  139.79    7.53  10
  -7   8  -1  158.46   12.84   7
   7   8   1  146.21    8.71   8
   7   8   1  136.17    8.56   9
  -7  -8  -1  139.96    5.97   6
  -7   8  -1  142.28   10.09  11
   7  -8   1  149.14   12.29   1
   7   8   1  137.11   10.22   3
  -8  -8  -1    0.32   64.48  10
   8   8   1    3.49   12.94   8
   9   8   1   20.10   11.86   9
  -9   8  -1   33.45    9.59  11
   9  -8   1   53.41   10.95   1
   9   8   1   23.00   12.55   3
   9   8   1   30.96    7.78   8
  -9  -8  -1   31.32    6.77  10
  10  -8   1   13.50   11.63   1
  10   8   1    2.52   10.72   8
  10  -8   1    1.95    4.05   9
 -10  -8  -1   -1.66    6.78  10
  10   8   1   -1.91    2.34   9
 -11  -8  -1   42.43    7.35  10
  11   8   1   23.69   11.10   9
 -11   8  -1   23.37    9.35  11
  11   8   1   45.53    8.54   8
  11  -8   1   43.94   12.08   1
 -12  -8  -1    0.80    2.93  10
  12  -8   1    3.51    9.08   1
 -13   8  -1   19.15   11.30  11
 -13  -8  -1   35.84    7.32  10
  13   8   1   19.59    8.13   9
  13   8   1    7.02    7.61   8
 -14   8  -1    7.30   10.23  11
 -14  -8  -1    5.64   10.25  10
  14   8   1    2.66   12.73   8
 -15   8  -1   21.75   10.45  11
 -15  -8  -1    8.14    8.81  10
  15   8   1   12.38    8.51   8
  15   8   1   -1.40    6.52   9
  16   8   1   -1.96   21.75   8
  16   8   1    0.71    2.21   9
 -16  -8  -1   11.39    8.75  10
  17   8   1   -1.45   13.00   8
  17   8   1    8.90    6.16   9
 -19  -8  -1    9.94    7.60  10
 -19  -9   1   -1.13    7.04  10
  18   9  -1   14.58   11.76   9
  18   9  -1    7.23   11.23   8
 -18   9   1   -0.57    1.66  11
 -18  -9   1    4.83    6.72  10
 -17  -9   1   14.23    8.08  10
 -17   9   1   18.80   14.73  11
  17   9  -1   27.08    9.83   9
  17   9  -1   22.74   10.52   8
 -16   9   1   22.63   11.90  11
 -16  -9   1   40.31   10.03  10
  16   9  -1   30.51   11.23   8
  16   9  -1   21.42    9.42   9
  15   9  -1   13.79    7.42   8
 -15  -9   1   18.80    9.40  10
 -15   9   1   19.80    9.44  11
 -14   9   1   44.87   11.49  11
  14   9  -1   49.79    9.45   9
  14   9  -1   49.02   10.65   8
 -14  -9   1   55.77    8.68  10
  13   9  -1   53.62    8.71   9
  13   9  -1   51.55   10.41   8
 -13   9   1   83.17   10.82  11
 -13  -9   1   73.63    8.58  10
 -12   9   1   11.91    9.95  11
  12   9  -1   12.77    6.38   9
 -12  -9   1   11.34    7.16  10
  11   9  -1  117.92    9.97   8
 -11   9   1  118.01   11.00  11
  11  -9  -1  141.95   14.71   1
  11   9  -1  143.65    9.52   9
 -11  -9   1  136.43    8.67  10
  10  -9  -1  120.31   12.72   1
  10   9  -1   79.59    8.54   8
  10   9  -1   77.72    7.68   9
 -10  -9   1   89.73    7.47  10
  10   9  -1   91.59    7.47  12
 -10   9   1  106.69    9.89  11
 -10   9   1   88.10   15.20   7
   9   9  -1   30.97    6.30  12
  -9   9   1   33.89    7.93  11
  -9   9   1   15.48   15.33   7
   9   9  -1   19.46    9.69   3
   9   9  -1   30.37    8.17   8
   9  -9  -1   34.31   10.30   1
   9   9  -1   37.24    6.32   9
   8   9  -1  505.18   21.24  12
  -8   9   1  504.17   21.22  11
   8   9  -1  513.76   20.22   3
   8   9  -1  515.92   18.45   9
   8   9  -1  540.04   20.35   8
   8  -9  -1  506.44   26.42   1
  -8   9   1  541.56   26.49   7
   7   9  -1   60.72    6.37  12
   7  -9  -1   52.53   10.33   1
   7  -9  -1   55.84    4.02   9
   7   9  -1   55.26    6.17   9
   7   9  -1   50.68    7.05   8
  -7   9   1   49.91   11.99   7
   7   9  -1   61.21    7.22   3
  -7   9   1   65.35    8.35  11
   6   9  -1  253.08   10.91   3
  -6   9   1  246.96   12.76  11
   6   9  -1  259.51   11.33   8
   6   9  -1  265.17   10.35   9
   6   9  -1  240.00   11.74  12
  -6   9   1  243.98   11.07  12
   6  -9  -1  263.80   15.28   1
  -6   9   1  247.81   15.26   7
   5  -9  -1  428.15   20.82   1
   5   9  -1  410.21   14.57   9
  -5   9   1  420.20   16.67   3
  -5   9   1  407.56   20.74   7
   5   9  -1  418.06   17.21  12
   5   9  -1  398.56   15.93   8
   5   9  -1  429.42   15.77   3
  -5   9   1  397.96   17.14  11
  -5   9   1  434.26   16.78  12
  -4   9   1    5.41    4.23  12
   4   9  -1    4.85    4.16  12
   4   9  -1    4.35    6.12   8
   4   9  -1    2.43    4.39   3
   4   9  -1    3.94    7.07   9
  -4  -9   1    3.92    3.17   6
  -3   9   1  379.85   19.58   7
  -3  -9   1  433.67   11.90   6
   3   9  -1  432.95   14.07   9
   3   9  -1  413.93   16.82  12
  -3   9   1  411.79   16.61  12
  -3  -9   1  435.54   14.68   2
   3  -9  -1  387.58   12.77  10
  -3   9   1  417.29   16.39  11
   3   9  -1  417.18   15.35   8
  -3   9   1  402.92   16.00   3
   3   9  -1  431.62   15.38   3
   2   9  -1   22.03    5.29  11
  -2   9   1   17.36    2.30   8
  -2  -9   1   16.41    1.86   6
   2   9  -1   18.71    4.18   3
  -2   9   1   20.02    4.21  12
  -2   9   1   19.09    4.59   3
   2   9  -1   17.91    4.00   8
  -2  -9   1   20.54    4.33   2
   2   9  -1   15.68    3.47   9
  -2   9   1   12.77    6.37   7
  -2   9   1   14.15    1.95   9
   2   9  -1   19.36    4.88  12
  -2   9   1   28.18    5.26  11
   2  -9  -1   16.32    2.76  10
  -1  -9   1    8.52    1.32   6
  -1   9   1    7.19    2.19   9
   1   9  -1   13.86    4.39  12
   1  -9  -1    3.59   17.84   5
  -1   9   1   -2.10    2.61  11
   1   9  -1    5.17    6.68   3
   1   9  -1    8.87    2.78   9
  -1  -9   1    9.98    4.73   2
   1   9  -1    7.69    5.13  11
   1   9  -1    7.07    3.69   8
  -1   9   1    4.75    9.21   7
  -1   9   1    7.35    3.18   8
   1  -9  -1   10.01    2.39   6
   0  -9  -1  422.31   12.07   5
   0   9  -1  431.16   15.92   3
   0   9  -1  435.31   13.94   9
   0   9   1  423.82   16.76  11
   0   9   1  431.33   19.47   7
   0   9  -1  420.14   15.20   8
   0  -9  -1  428.52   12.37   6
   0  -9   1  406.63   12.11   6
   0   9  -1  433.99   16.65  11
   0   9   1  426.34   13.85   9
   0   9   1  438.01   15.26   8
   0   9  -1  441.81   17.32  12
   0   9   1  434.61   16.22   3
  -1  -9  -1   80.46    2.84   5
   1   9   1   82.39    6.47  11
  -1   9  -1   85.98    6.48  11
  -1  -9  -1   90.47    5.90   2
   1  -9   1   83.74    3.90   4
   1   9   1   84.04    4.94   7
   1   9   1   83.48    4.17   9
   1   9   1   87.15    5.83   3
  -1   9  -1   71.56    6.21   7
  -1   9  -1   83.38    5.96  12
  -1  -9  -1   79.86    3.41   6
  -1   9  -1   84.59    4.15   8
  -1   9  -1   92.86    5.86   3
  -1   9  -1   89.14    3.76   9
   1   9   1   82.99    4.73   8
   2   9   1   93.67    5.29   8
  -2   9  -1   96.43    6.32  12
  -2  -9  -1   95.24    6.11   2
  -2   9  -1   92.98    6.41   3
  -2  -9  -1   97.03    3.51   6
  -2   9  -1  105.09    6.63  11
   2  -9   1   96.48    4.50   4
   2   9   1   99.09    6.17   3
  -2   9  -1   88.40    6.97   7
   2   9   1   93.02    4.69   9
  -2  -9  -1   82.28    2.81   5
   3   9   1  190.35    8.67   8
  -3  -9  -1  201.35    6.34   6
  -3   9  -1  180.22   11.57   7
  -3   9  -1  197.92    9.73  11
  -3   9  -1  212.52    9.47  12
  -3  -9  -1  203.84    8.87   2
  -3   9  -1  204.65    9.60   3
   3   9   1  208.88    9.01   3
   3   9   1  213.59    7.85   9
   4   9   1  245.90   10.45   8
  -4  -9  -1  252.30    7.77   6
  -4   9  -1  251.59   11.07   3
  -4   9  -1  236.88   13.62   7
  -4   9  -1  244.53   10.94  12
   4   9   1  257.70   10.62   3
   4   9   1  259.64    9.43   9
  -4   9  -1  241.37   11.71  11
   5   9   1   65.59    5.73   9
  -5   9  -1   69.63    5.63  12
   5   9   1   77.14    6.60   3
  -5  -9  -1   73.31    3.79   6
   5   9   1   48.11    6.22   8
  -5   9  -1   65.48    8.94  11
  -5   9  -1   58.85   10.44   7
   6  -9   1   77.26   10.95   1
   6   9   1   90.46    7.10   9
  -6   9  -1   74.28   10.95   7
  -6  -9  -1   92.11    4.61   6
  -6   9  -1   93.77    8.49  11
   6   9   1   92.64    7.22   8
   6   9   1   83.72    8.03   3
  -7   9  -1   15.96    8.81  11
  -7  -9  -1    6.08    3.35   6
   7   9   1    6.24   23.52   9
   7   9   1    5.25   11.44   8
   7   9   1   22.65    7.32   3
   7  -9   1    0.64    6.40   1
  -7  -9  -1    7.93    5.84  10
   8   9   1    3.25    8.31   8
   8  -9   1   21.32   10.04   1
   8   9   1   11.29    7.49   3
   8   9   1   11.42   10.21   9
  -8  -9  -1   17.29    6.57  10
  -8   9  -1   21.43    8.39  11
  -9   9  -1   17.35    8.59  11
   9   9   1   24.58    8.78   3
  -9  -9  -1   18.12    6.48  10
   9   9   1   19.38    8.75   9
   9  -9   1   29.05   10.46   1
   9   9   1   26.57    7.30   8
  10  -9   1   16.22   10.21   1
  10   9   1   -2.94    3.89   3
  10   9   1    6.31    6.36   9
 -10  -9  -1    5.99   11.45  10
 -10   9  -1    0.46    7.85  11
  10   9   1    1.72    3.30  12
  11  -9   1   53.95   11.91   1
  11   9   1   30.22    9.03   8
  11   9   1   36.92    8.56   9
 -11  -9  -1   37.50    6.96  10
 -11   9  -1   29.61    9.56  11
  12  -9   1   27.42   13.66   1
 -12   9  -1   15.04    9.80  11
 -12  -9  -1   15.71    7.92  10
  12   9   1   17.94    8.40   9
  12   9   1   22.61    9.43   8
  13   9   1   -1.50    3.30   8
 -13  -9  -1   14.76    7.47  10
  13   9   1    7.58    7.68   9
 -13   9  -1   21.92   11.18  11
  14   9   1    1.20    3.96   9
 -14   9  -1    5.09   15.07  11
  15   9   1   19.00   10.57   8
  15   9   1   14.80   11.41   9
 -15   9  -1   23.41   12.13  11
 -15  -9  -1   11.98   10.19  10
 -16  -9  -1    8.87   13.18  10
  16   9   1   13.58    8.71   9
  16   9   1    7.91   10.70   8
  17   9   1    5.48    9.32   8
 -17   9  -1    3.39  239.46  11
  17   9   1   11.22    8.75   9
 -17  -9  -1    5.17   20.73  10
  18   9   1    3.76   27.29   8
 -17  10   1   57.84   13.96  11
 -17 -10   1   65.75   10.24  10
  17  10  -1   40.81   10.80   9
  17  10  -1   52.75   11.66   8
 -16  10   1   12.85   10.75  11
 -16 -10   1    7.85    8.05  10
  16  10  -1   18.07   10.40   8
  16  10  -1    7.91    9.61   9
  15  10  -1   57.07   10.40   9
 -15 -10   1   61.99    9.41  10
  15  10  -1   67.47   11.11   8
 -15  10   1   78.28   12.65  11
  14  10  -1   17.57   10.50   8
 -14 -10   1    5.57    6.68  10
  14  10  -1   16.36    8.08   9
 -14  10   1   12.67   10.47  11
 -13  10   1   24.31    9.20  11
  13  10  -1    7.49   14.03   8
  13  10  -1   14.20    8.00   9
 -13 -10   1   20.02    7.76  10
  12  10  -1   45.37    7.97   8
  12 -10  -1   24.67   11.83   1
 -12 -10   1   54.31    7.79  10
 -12  10   1   16.96    8.05  11
  12  10  -1   49.19    8.17   9
 -11 -10   1   51.26    7.80  10
  11 -10  -1   74.66   13.08   1
 -11  10   1   56.84    9.70  11
  11  10  -1   44.32   10.59   8
  11  10  -1   53.83    7.95   9
  10  10  -1    8.67    6.21   8
 -10 -10   1    4.27    8.11  10
  10 -10  -1   10.62    9.65   1
 -10  10   1   11.12    8.85  11
  10  10  -1    0.85   41.71  12
  10  10  -1   16.60    6.67   9
 -10  10   1   27.46   16.03   7
   9  10  -1  316.27   14.21   8
  -9  10   1  320.07   19.04   7
   9 -10  -1  297.47   18.91   1
  -9  10   1  323.76   15.17  11
   9  10  -1  313.81   12.89   9
   9  10  -1  323.10   14.38  12
   8  10  -1   -1.22   14.73   9
   8 -10  -1    3.17    5.30   1
   8  10  -1    6.59    5.35  12
  -7  10   1  493.79   21.26  11
   7 -10  -1  521.70   25.96   1
   7  10  -1  493.28   21.03  12
   7  10  -1  507.57   19.87   8
   7  10  -1  530.01   19.55   3
  -7  10   1  509.15   20.39  12
  -7  10   1  526.72   25.79   7
   7  10  -1  517.47   18.19   9
   6  10  -1   16.51    4.73   9
   6  10  -1   12.86    4.94  12
   6 -10  -1    4.43   15.68   1
   6  10  -1   10.73    9.01   3
  -6  10   1   12.38   15.19   7
  -5  10   1  242.49   12.20   3
   5 -10  -1  258.34   15.00   1
   5  10  -1  241.88   11.17   8
  -5  10   1  247.12   14.70   7
   5  10  -1  260.07   10.81   3
  -5  10   1  244.39   12.82  11
   5  10  -1  264.68   12.18  12
   5  10  -1  257.70   10.20   9
  -5  10   1  261.01   11.42  12
  -4  10   1   13.65    5.14  12
   4  10  -1   10.35    5.43   3
  -4 -10   1   22.17    4.42   2
  -4  10   1   16.30    6.05   3
   4  10  -1    6.51    4.89   8
  -4  10   1   18.97    7.25   7
   4  10  -1   11.06    3.83   9
  -4  10   1   13.02    6.58  11
  -4 -10   1   18.27    2.52   6
   4  10  -1   19.39    5.09  12
  -3  10   1   38.30    5.86  11
  -3  10   1   29.49    4.97  12
   3  10  -1   32.58    4.43   9
  -3 -10   1   33.40    2.40   6
  -3 -10   1   33.54    5.50   2
   3 -10  -1   22.89    2.30  10
  -3  10   1   25.64    6.55   7
  -3  10   1   31.85    5.70   3
   3  10  -1   21.44    5.19   8
   3  10  -1   21.97    5.72  12
   3  10  -1   29.10    4.85   3
  -2 -10   1   15.90    4.55   2
   2  10  -1   17.86    4.82  11
  -2  10   1    9.09    2.31   9
   2  10  -1   13.15    4.56   8
  -2  10   1   13.68    2.57   8
  -2  10   1   22.28    4.05   3
   2  10  -1   22.03    4.69  12
  -2  10   1    9.31    4.92  12
   2  10  -1   19.37    4.02   9
   2  10  -1   11.83    4.76   3
  -2 -10   1   16.16    1.62   6
  -2  10   1   16.49    5.18  11
   2 -10  -1   10.28    3.61  10
  -2  10   1   14.72    5.10   7
  -1 -10   1  772.65   24.30   6
  -1  10   1  882.70   32.10  11
   1  10  -1  871.77   31.86  11
   1  10  -1  893.70   27.76   9
   1 -10  -1  872.04   24.30   5
  -1  10   1  871.80   27.49   9
  -1  10   1  890.71   31.33   3
  -1  10   1  837.58   38.64   7
  -1 -10   1  897.17   28.52   2
  -1  10   1  876.44   33.47  12
   1  10  -1  876.07   33.56  12
   1  10  -1  891.49   30.29   8
  -1  10   1  877.82   30.01   8
   1 -10  -1  885.47   24.62   6
   1  10  -1  922.38   31.07   3
   0 -10  -1    4.65    3.62   5
   0  10  -1    8.52    3.58   9
   0 -10  -1    4.70    3.65   6
   0  10  -1    6.62    8.10   3
   0  10  -1    9.44    3.30   8
   0 -10   1    5.24    1.62   5
   0  10   1    3.94    3.21   8
   0  10   1    2.72    5.88  11
   0  10   1    6.92   24.73   7
   0  10  -1   -2.32   89.36  11
   0 -10   1    5.19    1.61   6
   0  10   1    9.45    2.24   9
   0  10  -1   12.37    4.02  12
   1  10   1  765.53   28.61  11
   1 -10   1  748.56   29.76   4
  -1  10  -1  747.98   24.57   9
   1  10   1  789.52   27.13   8
   1 -10   1  767.38   21.80   6
   1  10   1  822.56   27.93   3
   1  10   1  776.89   24.79   9
  -1  10  -1  807.56   26.81   8
  -1 -10  -1  713.79   21.43   5
  -1  10  -1  814.96   28.78  11
  -1 -10  -1  792.67   25.63   2
   1  10   1  762.50   34.04   7
  -1 -10  -1  790.22   21.87   6
  -1  10  -1  810.83   30.05  12
  -1  10  -1  757.38   27.90   3
   2  10   1  119.60    6.24   8
  -2  10  -1  114.40    4.79   9
  -2 -10  -1  117.98    4.20   6
  -2  10  -1  112.63    7.26  12
  -2 -10  -1  117.33    7.24   2
  -2  10  -1  118.48    7.41   3
  -2  10  -1  121.75    7.67  11
   2  10   1  123.77    5.47   9
   2  10   1  116.75    6.63   3
   2 -10   1  123.89    5.31   4
  -2  10  -1   96.37    8.33   7
  -3  10  -1   66.71    6.99   3
   3  10   1   82.02    6.56   3
   3  10   1   75.33    5.58   8
   3  10   1   80.52    4.92   9
  -3 -10  -1   79.19    6.66   2
  -3  10  -1   77.81    7.15  11
  -3  10  -1   66.30    8.69   7
  -3  10  -1   77.62    6.20  12
  -3 -10  -1   74.73    3.49   6
   4  10   1   27.36    6.49   8
  -4  10  -1   28.45    7.88   3
  -4 -10  -1   35.75    3.16   6
  -4  10  -1   35.59    8.82  11
  -4  10  -1   30.06    5.97  12
  -4  10  -1   19.33   38.37   7
   4  10   1   38.47    5.88   3
  -4 -10  -1   41.89    6.46   2
   4  10   1   44.82    4.77   9
  -5 -10  -1   27.45    3.67   6
   5  10   1   21.61    6.34   8
   5  10   1   29.76    7.42   3
  -5  10  -1    7.11   45.85  11
   5  10   1   37.42    5.10   9
  -5  10  -1   18.75   17.18   7
  -5  10  -1   15.62    5.56  12
  -6 -10  -1    3.84    6.82   6
   6  10   1    6.79    3.66   9
  -6  10  -1    2.30   26.52   7
   6  10   1    7.40   11.52   3
   7  10   1   73.81    8.39   8
   7 -10   1   74.57   12.12   1
   7  10   1   96.83    7.62   9
  -7 -10  -1   89.46    7.30  10
  -7 -10  -1   94.67    5.16   6
  -7  10  -1   96.52    9.63  11
   7  10   1   96.02    8.33   3
  -8  10  -1   28.48    8.08  11
   8  10   1   31.79    7.88   8
   8  10   1   28.67    6.52   9
   8 -10   1   30.69   10.91   1
  -8 -10  -1   27.61    6.76  10
   8  10   1   36.91    7.89   3
   9 -10   1    1.94    7.85   1
  -9  10  -1   -0.11    5.14  11
   9  10   1    4.08    5.18   3
  10 -10   1   12.41   10.14   1
 -10 -10  -1   -1.02    6.45  10
  10  10   1    5.82    5.11   9
  10  10   1   -1.24    2.03  12
 -10  10  -1    2.92  194.07  11
  10  10   1   11.19    8.79   8
 -11  10  -1   12.91   10.38  11
  11 -10   1   17.11   11.65   1
  11  10   1    7.65    7.25   9
  11  10   1    5.85    8.83   8
 -11 -10  -1    1.78   10.72  10
  12  10   1   17.55    7.88   8
 -12 -10  -1   11.65    7.80  10
  12  10   1   14.38    8.71   9
 -12  10  -1    3.11    9.27  11
  12 -10   1   15.03   14.59   1
  13  10   1   -1.42    2.29   9
 -13 -10  -1   -1.65    4.85  10
  13 -10   1   17.57   13.12   1
 -14  10  -1    8.75    9.91  11
  14  10   1    5.53   32.09   8
 -14 -10  -1   12.13    9.08  10
  14  10   1    8.37    8.96   9
  15  10   1   19.64   13.36   9
 -15  10  -1    5.74   11.98  11
  15  10   1   -2.45    4.63   8
 -15 -10  -1    6.11    8.94  10
  16  10   1    2.13   28.90   8
 -16 -10  -1    8.01    7.58  10
  16  10   1    5.88   10.32   9
 -16  10  -1   15.02   11.89  11
 -17  10  -1   29.22   13.89  11
  17  10   1   26.57   12.50   8
  17  10   1    5.37   27.58   9
 -17 -10  -1   19.86   11.75  10
 -18 -11   1    4.57   16.92  10
  17  11  -1    2.71    4.53   9
 -17 -11   1    3.49    5.47  10
 -17  11   1    5.83   11.15  11
  17  11  -1   17.72   11.18   8
 -16 -11   1   46.29   10.65  10
  16  11  -1   23.49   10.60   8
 -16  11   1   20.97   15.10  11
  16  11  -1   36.80   10.26   9
 -15  11   1   20.86   10.61  11
  15  11  -1    9.05    9.24   9
 -15 -11   1    6.17    7.11  10
  15  11  -1    1.12    6.83   8
  14  11  -1   36.32   11.21   9
 -14 -11   1   42.99    9.33  10
 -14  11   1   30.02   11.43  11
  14  11  -1   30.47   11.33   8
 -13 -11   1   51.75    8.81  10
  13  11  -1   46.74    9.14   9
 -13  11   1   60.24   10.97  11
  13  11  -1   56.38    9.95   8
 -12 -11   1   -0.73    3.83  10
  12  11  -1   -1.36    4.28   9
 -12  11   1    7.72    8.60  11
  12 -11  -1    9.43   12.84   1
 -11  11   1   67.31   10.03  11
 -11 -11   1   74.99    8.02  10
  11  11  -1   74.14    9.15   8
  11 -11  -1   82.62   13.01   1
  11  11  -1   68.82    8.27   9
 -10 -11   1  118.09    8.79  10
 -10  11   1  132.92   11.07  11
 -10  11   1  151.91   14.79   7
  10 -11  -1  132.20   14.01   1
  10  11  -1  110.00    9.70   8
  10  11  -1  128.30    9.27  12
  10  11  -1  138.95    9.31   9
   9 -11  -1   48.48   10.47   1
   9  11  -1   36.32    7.77  12
   9  11  -1   32.11    9.55   8
   9  11  -1   46.21    7.25   9
  -9  11   1   45.70   12.38   7
  -9  11   1   39.12   10.63  11
   8  11  -1  198.98   11.65  12
   8 -11  -1  226.21   15.34   1
   8  11  -1  211.10   11.37   8
  -8  11   1  212.95   12.60  11
   8  11  -1  221.60   10.31   9
  -8  11   1  279.28   16.20   7
   7  11  -1   18.53    6.65  12
   7 -11  -1    2.86    9.11   1
   7  11  -1   12.12    6.66   8
   7  11  -1   10.26    7.98   9
  -7  11   1    4.95    6.95  12
  -7  11   1   11.86   10.87   7
  -6  11   1  157.92   11.81  11
   6  11  -1  185.06   10.60  12
   6 -11  -1  171.44   13.55   1
   6  11  -1  164.79    9.60   8
   6  11  -1  185.96    9.20   3
  -6  11   1  172.68    9.42  12
   6  11  -1  199.08    8.89   9
  -6  11   1  180.25   13.26   7
  -5  11   1  172.88    9.44  12
   5  11  -1  191.17    8.54   9
  -5  11   1  187.46   11.09  11
  -5  11   1  204.55   10.82   3
   5  11  -1  182.98    8.93   3
   5 -11  -1  173.11   13.01   1
  -5  11   1  178.70   13.03   7
   5  11  -1  191.72    9.99  12
   5  11  -1  163.07    9.32   8
  -4  11   1    5.46    8.20  12
  -4  11   1   -1.00    2.88  11
   4  11  -1    3.76    7.08   9
  -4 -11   1    5.71    4.34   2
  -3 -11   1  247.06    7.35   6
   3  11  -1  240.62   10.38   3
  -3  11   1  262.53   11.50   3
  -3  11   1  236.54   11.43  12
  -3  11   1  235.59   13.42   7
  -3 -11   1  242.96   10.46   2
   3 -11  -1  219.05    7.96  10
   3  11  -1  243.83    9.36   9
   3  11  -1  242.28   10.36   8
   3  11  -1  258.52   11.91  12
  -3  11   1  243.23   11.76  11
  -2  11   1  268.58   12.93  11
   2 -11  -1  268.10    9.01  10
  -2 -11   1  279.51   10.98   2
  -2  11   1  263.46   13.72   7
  -2  11   1  282.62   11.76   3
  -2 -11   1  239.82    7.75   6
  -2  11   1  258.58    9.77   8
   2  11  -1  279.28   11.22   3
  -2  11   1  244.16    8.84   9
   2  11  -1  283.04   12.36  12
   2  11  -1  270.73   12.28  11
   2  11  -1  276.28   10.74   8
  -2  11   1  281.22   12.21  12
   2  11  -1  267.27    9.69   9
   1  11  -1  196.97    8.79   3
  -1 -11   1  176.55    8.66   2
  -1  11   1  170.22    6.46   9
   1 -11  -1  189.14    6.07   6
  -1 -11   1  150.39    5.24   6
  -1  11   1  192.70    9.17  12
   1  11  -1  185.48    9.71  12
  -1  11   1  186.13   10.36  11
   1 -11  -1  167.82    5.88   5
  -1  11   1  181.12    9.21   3
  -1  11   1  184.96    7.17   8
   1  11  -1  183.74    7.66   8
   1  11  -1  182.63    9.92  11
  -1  11   1  181.48    9.83   7
   1  11  -1  175.26    6.97   9
   0  11  -1  465.19   14.45   9
   0  11   1  452.96   17.66  11
   0  11  -1  453.09   16.62   3
   0 -11   1  374.18   12.27   5
   0 -11  -1  418.43   12.39   5
   0 -11   1  423.50   12.43   6
   0  11  -1  467.02   17.60  11
   0  11  -1  469.73   18.16  12
   0  11   1  454.06   16.99   3
   0  11   1  439.58   14.33   9
   0 -11  -1  449.70   12.80   6
   0  11   1  437.54   15.85   8
   0  11   1  418.72   19.74   7
   0  11  -1  437.65   15.80   8
  -1 -11  -1   74.74    3.31   6
   1  11   1   75.03    4.96   8
   1 -11   1   68.39    3.14   6
  -1 -11  -1   75.82    6.59   2
   1 -11   1   65.57    3.64   4
   1  11   1   71.77    6.78   3
   1  11   1   79.93    4.35   9
  -1  11  -1   69.66    8.46  11
  -1  11  -1   68.11    4.28   8
  -1  11  -1   74.24    3.80   9
  -1  11  -1   82.67    6.30   3
  -1 -11  -1   58.98    2.46   5
   1  11   1   64.35    4.00   7
  -1  11  -1   80.00    6.74  12
   1  11   1   78.37    7.25  11
   2  11   1  357.96   13.71   8
  -2  11  -1  362.42   14.58   3
   2  11   1  366.30   14.17   3
   2 -11   1  359.55   14.06   4
   2  11   1  367.36   12.42   9
  -2  11  -1  333.43   15.13  12
  -2 -11  -1  381.35   13.70   2
  -2 -11  -1  353.52   10.50   6
  -2  11  -1  344.01   11.87   9
  -2  11  -1  361.63   15.05  11
  -3 -11  -1  100.17    7.63   2
   3  11   1   98.04    7.27   3
  -3  11  -1   98.58    8.09   3
   3  11   1   98.65    6.76   8
   3  11   1  102.04    5.96   9
  -3 -11  -1   99.31    4.09   6
  -3  11  -1   95.22    8.26  11
  -3  11  -1   86.27    7.57  12
  -4  11  -1   -2.10    1.95  12
  -4  11  -1   -1.91    2.59  11
   4  11   1    2.55    3.18   3
  -4 -11  -1   -0.39    0.93   6
  -4 -11  -1    2.76    7.75   2
   4  11   1    5.64    5.35   9
  -5 -11  -1   84.95    4.39   6
   5  11   1   86.04    7.48   3
  -5  11  -1   73.94    6.76  12
   5  11   1   77.76    6.37   9
   5  11   1   67.87    7.42   8
  -5  11  -1   72.65    9.65  11
   6  11   1    2.81   17.94   3
   6  11   1    5.69    8.93   8
  -6 -11  -1   15.99    6.77  10
  -6 -11  -1   15.98    3.74   6
   6  11   1   26.51    5.80   9
   7  11   1    0.34    4.25   3
   7  11   1    5.98    4.55   9
  -7 -11  -1   -0.94   12.01  10
  -8  11  -1   16.06    8.68  11
   8  11   1   18.03    9.68   8
   8  11   1   45.34    6.81   3
  -8 -11  -1   20.05    6.97  10
   8 -11   1   21.35   10.25   1
   8  11   1   28.44    7.36   9
   9  11   1   -0.69    1.57  12
   9  11   1   11.61    6.45   9
  -9 -11  -1   -1.24    8.08  10
   9  11   1    1.44   58.91   8
  10  11   1    7.01    8.78   9
  10  11   1    4.56    6.71  12
  10  11   1    5.95    7.26   8
  10 -11   1   14.87   13.21   1
 -10  11  -1    8.01   11.36  11
 -11 -11  -1   11.46    7.93  10
 -11  11  -1    5.97   12.73  11
  11 -11   1    3.41   13.37   1
 -12 -11  -1    1.25    7.78  10
 -12  11  -1    3.73   10.98  11
  12 -11   1    2.85    7.75   1
 -13 -11  -1    2.70  124.81  10
 -13  11  -1    8.36    8.93  11
  13  11   1   14.89   13.32   9
  13 -11   1   21.30   14.36   1
 -14  11  -1    0.51    3.28  11
 -14 -11  -1    0.08    2.38  10
 -15 -11  -1    9.27    9.08  10
 -15  11  -1    5.57   19.60  11
  15  11   1    1.02    6.65   9
  16  11   1   12.60    9.93   8
 -16 -11  -1   15.93   10.21  10
  16  11   1    8.64   11.71   9
 -16  11  -1   22.04   13.94  11
 -17  11  -1    1.88   66.62  11
  17  11   1   15.08   14.56   8
 -18 -11  -1    2.27   13.05  10
 -17 -12   1   23.74   10.18  10
  17  12  -1   28.19   11.18   8
 -16 -12   1   14.36   10.20  10
  16  12  -1    8.03   11.15   8
  16  12  -1   18.63    9.02   9
  15  12  -1   22.26    9.01   9
  15  12  -1    8.49   11.25   8
 -15  12   1   28.00   12.04  11
 -15 -12   1   16.61    9.77  10
  14  12  -1   36.62    9.84   9
 -14  12   1   31.71   12.62  11
  14  12  -1   52.01   10.06   8
 -14 -12   1   30.34    9.06  10
 -13  12   1    9.43   14.98  11
  13  12  -1   -1.09  398.21   8
  13  12  -1   11.97    8.93   9
 -13 -12   1    9.76    8.88  10
 -12  12   1  175.00   13.59  11
  12  12  -1  182.65   11.09   9
 -12 -12   1  170.47   10.51  10
  12 -12  -1  192.48   17.73   1
  12  12  -1  176.81   12.31   8
  11  12  -1   11.03    8.41   9
 -11 -12   1    3.66   12.41  10
  11 -12  -1    7.38   11.45   1
  11  12  -1    1.39    9.84   8
  10  12  -1  136.38    9.70   9
  10  12  -1  133.93   10.57   8
 -10 -12   1  144.80    9.24  10
  10 -12  -1  174.92   14.88   1
 -10  12   1  142.34   12.02  11
  10  12  -1  142.80    9.91  12
  -9 -12   1   43.96    7.06  10
   9  12  -1   33.58    8.03   8
   9  12  -1   27.53    7.84  12
   9 -12  -1   45.29   10.68   1
   9  12  -1   66.14    7.64   9
  -9  12   1   33.14   10.03  11
   8  12  -1    7.87    9.27   9
   8 -12  -1    3.83    5.11   1
   8  12  -1    1.41    2.44  12
   7  12  -1   42.11    6.42   9
   7  12  -1   37.21    7.99   8
  -7  12   1   13.83    6.51  12
   7  12  -1   14.38    8.08  12
  -7  12   1   24.45    7.97  11
   7 -12  -1   22.93    9.43   1
  -6  12   1  378.28   16.70  12
   6  12  -1  358.94   16.08   8
  -6  12   1  419.17   20.88   7
   6  12  -1  383.14   14.86   9
   6  12  -1  407.24   15.60   3
  -6  12   1  384.35   17.50  11
   6  12  -1  420.19   17.50  12
   6 -12  -1  400.03   21.47   1
   5  12  -1   12.30    5.86   9
   5 -12  -1   -2.15    3.87   1
  -5  12   1   22.02   11.61   7
  -5  12   1   13.78    7.04  11
  -5  12   1    7.89    6.41  12
   5  12  -1    5.60    6.95   8
   5  12  -1   15.99    8.06  12
  -4 -12   1  594.08   20.51   2
   4  12  -1  601.38   23.76  12
   4  12  -1  578.90   19.69   9
   4  12  -1  560.50   21.49   8
  -4  12   1  597.22   22.60   3
   4  12  -1  582.42   21.38   3
  -4  12   1  563.26   22.89  11
  -4  12   1  563.67   27.49   7
  -4  12   1  588.51   23.34  12
  -3 -12   1    8.74    5.81   2
  -3  12   1   10.65    4.71  11
  -3 -12   1    3.41    2.07   6
   3  12  -1    4.58    7.52  12
  -3  12   1    2.48  924.65   3
   3  12  -1    4.03   12.19   3
   3  12  -1    0.61    1.20   9
  -2  12   1  222.28   12.53  11
  -2  12   1  231.11   10.94   3
  -2 -12   1  206.25    6.47   6
  -2 -12   1  231.88   10.24   2
  -2  12   1  193.23    7.54   9
   2  12  -1  219.14    8.48   9
   2  12  -1  241.70   11.53  12
  -2  12   1  225.15   11.12  12
   2  12  -1  222.73   11.42  11
  -2  12   1  202.86   12.43   7
  -2  12   1  211.77    8.42   8
   2 -12  -1  218.78    7.93  10
   2 -12  -1  216.17    7.23   6
   2  12  -1  220.45    9.37   8
   2  12  -1  257.13   10.26   3
  -1  12   1   33.49    8.48  11
   1  12  -1   35.28    6.55   3
  -1 -12   1   31.36    6.87   2
  -1  12   1   24.94    7.28   7
  -1  12   1   39.32    5.62   3
  -1  12   1   27.58    3.33   9
   1  12  -1   29.82    6.24  12
   1  12  -1   34.71    7.17  11
  -1 -12   1   26.83    1.69   6
   1 -12  -1   34.53    4.21  10
  -1  12   1   18.44    6.77  12
   1  12  -1   37.81    4.60   8
  -1  12   1   26.59    3.74   8
   1 -12  -1   25.79    3.42   5
   1 -12  -1   31.35    3.55   6
   1  12  -1   32.47    4.02   9
   0  12  -1    9.83    3.57   9
   0 -12  -1   15.35    3.05   6
   0 -12   1    7.34    1.97   5
   0  12  -1    9.25    4.44   8
   0  12   1    8.81    5.34   7
   0 -12   1    9.73    1.88   6
   0 -12  -1   11.93    2.31   5
   0  12  -1   10.56    8.23   3
   0  12   1    9.57    3.95   9
   0  12  -1   11.65    6.95  11
   0  12   1   14.97    8.80  11
   0  12   1   19.67    5.55  12
   0  12   1   14.04    3.72   8
   0  12  -1   15.53    6.39  12
  -1 -12  -1    6.14    3.05   6
  -1  12  -1    7.23   15.05  12
  -1  12  -1    3.82   17.22   3
   1  12   1    7.73    3.80   9
   1 -12   1    1.92    5.36   6
  -1  12  -1    3.59    3.77   9
   1  12   1    8.87   39.86   3
   1  12   1   16.31    5.13  12
   1  12   1    4.28    4.80   8
   1  12   1   22.09    6.16  11
  -1 -12  -1    2.50   12.09   2
   1 -12   1    9.75    1.96   4
  -2 -12  -1  201.69    9.74   2
   2  12   1  197.48    7.83   9
  -2  12  -1  190.49    9.96   3
  -2 -12  -1  178.32    6.17   6
  -2  12  -1  175.38    7.14   9
   2  12   1  205.55    9.67   3
  -2  12  -1  197.00   11.01  11
  -2  12  -1  177.68   10.32  12
   2 -12   1  190.04    7.87   4
   2  12   1  204.19    8.76   8
  -3 -12  -1   44.34    3.15   6
  -3  12  -1   33.67    7.48  11
  -3 -12  -1   40.23    6.33   2
   3  12   1   23.74    5.44   8
  -3  12  -1   35.50    8.16   3
  -3  12  -1   31.25    6.32  12
   3  12   1   32.54    4.87   9
   3  12   1   46.24    6.07   3
   4  12   1  120.73    8.06   8
  -4  12  -1  114.75    9.53   3
   4  12   1  133.41    7.17   9
  -4 -12  -1  125.13    9.10   2
  -4 -12  -1  129.78    5.05   6
  -4  12  -1  116.98    8.36  12
   4  12   1  132.66    8.74   3
  -4  12  -1  121.76    9.66  11
   5  12   1   25.06    6.22   9
   5  12   1   24.32    7.05   8
  -5 -12  -1   17.94    3.87   6
   5  12   1    7.55    8.71   3
  -5  12  -1   10.72    5.31  12
  -5  12  -1   13.09    9.46  11
  -5 -12  -1    2.33    6.63  10
  -6  12  -1   11.33   17.57  11
  -6 -12  -1   16.30    6.53  10
  -6 -12  -1   21.34    4.10   6
   6  12   1   13.28   10.33   8
   6  12   1   20.62    6.88   3
   6 -12   1    8.01   18.57   1
  -6  12  -1   10.11    6.66  12
   6  12   1   19.99    5.58   9
  -7  12  -1   25.10   10.42  11
   7  12   1   34.70    6.52   9
   7 -12   1   35.08   11.32   1
   7  12   1   36.87    7.24   3
  -7 -12  -1   26.60    6.81  10
   7  12   1   26.71    7.82   8
   8 -12   1    5.54    9.40   1
   8  12   1    4.97    9.28   8
  -8  12  -1    3.95   11.24  11
   8  12   1   11.53    7.72  12
   8  12   1    9.96    7.04   9
  -8 -12  -1    8.73    7.76  10
  -9 -12  -1    6.91    5.49  10
   9  12   1   11.21    7.40  12
   9  12   1   19.79    6.53   9
   9 -12   1    5.29   10.26   1
  10  12   1    2.95    4.32  12
  11 -12   1    9.59    9.31   1
  11  12   1    3.16    6.36   8
 -11 -12  -1    2.49   29.09  10
 -12 -12  -1    2.88   29.12  10
  12 -12   1   12.68   16.09   1
  12  12   1    1.91    7.41   9
 -12  12  -1   11.68    9.45  11
  13 -12   1   17.82   13.53   1
 -13  12  -1   15.90   10.98  11
 -13 -12  -1   -0.96    4.99  10
 -14  12  -1    8.70    9.00  11
  14  12   1    9.37   19.35   9
 -14 -12  -1    2.54   12.05  10
  15  12   1   15.33   10.34   8
 -15  12  -1   -1.07   13.00  11
 -15 -12  -1   28.66   10.06  10
  15  12   1   19.67    9.08   9
  16  12   1   -2.24    8.52   8
 -16 -12  -1    4.18    7.13  10
  16  12   1   10.40    7.51   9
 -17 -12  -1   14.99   13.04  10
 -17 -13   1   10.34   10.57  10
 -16 -13   1   35.31   10.19  10
  16  13  -1   36.67   11.11   9
 -16  13   1   38.07   13.74  11
  16  13  -1   23.24   11.97   8
 -15  13   1   16.33   13.88  11
  15  13  -1    4.47    9.98   9
  15  13  -1   16.22    9.60   8
 -15 -13   1   24.46    8.60  10
 -14  13   1   46.94   12.60  11
  14  13  -1   36.44   10.44   8
  14  13  -1   52.72   11.18   9
 -14 -13   1   41.17   10.06  10
  13  13  -1   58.34   10.07   8
 -13  13   1   70.06   13.21  11
  13  13  -1   75.90   10.12   9
 -13 -13   1   71.58    9.50  10
 -12  13   1   14.20   10.23  11
  12  13  -1    3.47   11.97   9
 -12 -13   1    7.38    9.67  10
  12 -13  -1   33.74   13.42   1
  11  13  -1  136.57   11.09   8
 -11 -13   1  151.01   10.14  10
 -11  13   1  149.63   12.68  11
  11 -13  -1  161.95   16.08   1
  11  13  -1  174.34   11.06   9
  10 -13  -1   36.95   11.70   1
 -10 -13   1   28.53    7.45  10
  10  13  -1   21.46    7.54   9
  10  13  -1   39.57    7.51  12
 -10  13   1   16.34   13.50  11
  10  13  -1   27.43    9.29   8
   9  13  -1   99.68    8.77   9
  -9  13   1   79.29   11.07  11
   9  13  -1   81.61    9.20  12
  -9 -13   1   94.04    8.28  10
   9  13  -1   68.52    9.50   8
   9 -13  -1   88.90   12.41   1
  -8  13   1  183.48   13.67   7
  -8  13   1  127.32   11.18  11
   8  13  -1  151.06    9.29   9
   8  13  -1  139.20    9.80   8
   8  13  -1  136.88   10.26  12
   8 -13  -1  122.46   13.38   1
   7  13  -1    0.62   19.07  12
  -7  13   1   18.81   11.45   7
   7  13  -1    3.37   23.69   9
   7  13  -1    5.60    8.70   8
  -7  13   1   -0.44    1.35  11
  -6  13   1  101.16    7.82  12
   6  13  -1   98.10    9.46  12
   6 -13  -1  108.36   11.88   1
   6  13  -1  104.69    7.31   9
   6  13  -1  102.16    8.20   8
  -6  13   1  120.99    9.85  11
   5  13  -1  184.38   11.26  12
   5  13  -1  182.43    8.96   9
  -5  13   1  194.99   13.48   7
   5  13  -1  192.50    9.28   3
  -5  13   1  210.89   11.58  11
   5 -13  -1  191.14   13.78   1
  -5  13   1  180.84   10.24  12
   5  13  -1  183.48    9.84   8
  -5  13   1  183.82   11.23   3
  -4  13   1    1.08   14.61  12
  -4  13   1   10.79   26.10   7
   4  13  -1    4.70   13.57  12
  -4  13   1    4.73   20.38   3
   4  13  -1   -1.66    4.31   9
  -4  13   1   20.27    7.52  11
  -4 -13   1   13.74    6.93   2
   4  13  -1    0.94    3.12   3
  -3  13   1  310.88   14.66  12
   3  13  -1  312.30   14.88  12
  -3 -13   1  348.78   13.27   2
   3  13  -1  300.67   13.00   8
   3  13  -1  319.64   11.80   9
  -3  13   1  324.84   14.13   3
  -3  13   1  325.58   16.84   7
  -3  13   1  307.53   15.39  11
   3  13  -1  326.09   13.41   3
   2  13  -1  158.52    6.84   9
   2  13  -1  163.80    7.75   8
   2 -13  -1  157.91    5.90   5
   2 -13  -1  143.81    6.44  10
  -2  13   1  144.33   11.33  11
  -2  13   1  143.06    6.64   8
  -2 -13   1  170.92    9.45   2
   2  13  -1  161.88   10.36  11
  -2  13   1  164.24    9.73   3
   2 -13  -1  155.05    5.84   6
   2  13  -1  173.10    8.87   3
  -2  13   1  146.76    9.46  12
  -2  13   1  147.84   10.51   7
   2  13  -1  150.10   10.14  12
  -1  13   1  250.43   13.21  11
  -1  13   1  247.78   12.59  12
   1 -13  -1  261.84    8.39   6
  -1  13   1  275.40   11.97   3
  -1 -13   1  267.84   11.60   2
   1  13  -1  249.29   12.88  11
   1  13  -1  258.06    9.44   9
   1  13  -1  257.44   10.44   8
  -1  13   1  244.24    9.96   8
  -1  13   1  253.83    8.94   9
   1 -13  -1  270.54    9.34  10
   1  13  -1  273.87   11.31   3
   1 -13  -1  241.47    7.98   5
  -1  13   1  231.13   13.22   7
   1  13  -1  272.87   12.97  12
   0  13  -1   64.11    5.11   8
   0 -13  -1   68.93    5.29  10
   0  13  -1   77.70    7.34   3
   0  13  -1   69.05    8.57  11
   0  13   1   70.29    7.45  12
   0  13  -1   70.05    4.63   9
   0  13  -1   64.99    7.76  12
   0  13   1   81.38    9.14  11
   0 -13  -1   71.72    3.83   6
   0  13   1   72.91    8.89   3
   0  13   1   71.45    5.02   8
   0  13   1   63.63    4.35   9
   1 -13   1   -0.32    0.96   4
  -1  13  -1    0.69    2.15   9
  -1 -13  -1    3.26    2.81   6
   1  13   1   12.88    7.26  11
  -1  13  -1    3.44   12.59   3
  -1  13  -1    2.80   78.02  12
   1  13   1    0.74    3.50  12
  -1 -13  -1    8.26    3.67  10
  -1 -13  -1    0.83    7.52   2
   2  13   1    3.58    4.04  12
  -2  13  -1    5.46    7.05   3
  -2  13  -1    1.61  230.95  11
   2  13   1   13.13   10.40   3
   2  13   1   -2.44    4.07   8
   2  13   1   -2.30    2.44   9
  -2 -13  -1    7.77   13.34   2
   2 -13   1    7.26    2.03   4
  -3 -13  -1   24.06    7.70   2
  -3  13  -1   19.52   11.00   3
   3  13   1   15.39    5.69   8
  -3  13  -1   16.02    6.90  11
   3  13   1   14.99    5.68   9
  -3  13  -1   11.80    9.05  12
   3  13   1   16.62   10.01  12
   3  13   1   19.30    6.01   3
  -4 -13  -1   65.48    8.78   2
  -4 -13  -1   53.20    6.48  10
  -4  13  -1   45.67    9.54   3
   4  13   1   58.53    6.90   8
  -4  13  -1   38.47    7.25  12
  -4  13  -1   59.18    8.72  11
   4  13   1   52.94    6.15   9
   4  13   1   68.37    7.14   3
  -5  13  -1   36.77    9.11  11
  -5  13  -1   37.02    6.66  12
  -5 -13  -1   53.18    5.97  10
   5  13   1   46.77    7.46   3
   5  13   1   26.72    6.30   9
   5  13   1   25.52    6.42   8
  -6  13  -1   54.06    9.57  11
  -6 -13  -1   59.19    6.67  10
   6  13   1   46.59    6.76   9
  -6  13  -1   44.38    7.06  12
   6  13   1   55.46    7.54   3
   6  13   1   45.57    8.78  12
   6  13   1   44.18    6.84   8
   6 -13   1   51.72   11.22   1
   7  13   1    1.62    3.06   9
   7  13   1   11.94    6.81  12
  -7 -13  -1   -1.72    6.34  10
   8  13   1    3.00   51.91  12
  -8  13  -1   11.31  259.10  11
   8  13   1    4.28    7.86   8
   8  13   1   22.86    7.07   9
  -8 -13  -1   11.84    5.99  10
   9  13   1    5.58   11.83   9
   9  13   1    0.42    5.72  12
   9 -13   1    5.82    8.32   1
  -9 -13  -1    2.73    6.58  10
  10  13   1    7.16    7.83   9
  10 -13   1    6.37    8.40   1
 -11  13  -1   -1.27   19.91  11
  11  13   1    7.31   31.67   8
  11 -13   1   14.45   14.10   1
  11  13   1    9.87    6.52   9
 -11 -13  -1    6.84   12.67  10
 -12 -13  -1   14.78    9.47  10
  12 -13   1   35.80   13.25   1
  12  13   1   15.20    9.03   9
  12  13   1    0.63   53.94   8
  13  13   1    7.33   10.29   8
  13  13   1   14.89    8.80   9
 -13 -13  -1    9.78    6.81  10
 -13  13  -1   10.41    9.32  11
  13 -13   1   29.62   16.14   1
  14  13   1    0.25    0.57   8
 -14 -13  -1   -0.97    8.02  10
 -15  13  -1    3.29   12.86  11
  15  13   1   31.54   11.15   8
 -15 -13  -1   22.48    9.68  10
 -16 -13  -1   13.31   11.74  10
  16  13   1    4.14   16.57   8
  16  13   1   21.74   11.54   9
 -17 -13  -1    1.11   14.13  10
  16  14  -1    1.87    4.87   9
  16  14  -1    6.00    7.64   8
 -16 -14   1    9.82    9.24  10
 -15 -14   1   53.63   10.33  10
  15  14  -1   84.87   12.31   8
 -15  14   1   73.90   14.47  11
  15  14  -1   68.07   11.13   9
  14  14  -1   22.26   10.57   9
 -14 -14   1   24.28    9.81  10
 -14  14   1   32.91   12.57  11
  14  14  -1   27.80   10.12   8
 -13  14   1   44.08   11.95  11
 -13 -14   1   14.82   10.49  10
  13  14  -1   18.10    9.13   8
  13 -14  -1   72.97   17.09   1
  13  14  -1   24.38   11.78   9
 -12 -14   1   47.39    9.65  10
 -12  14   1   15.31    9.82  11
  12  14  -1   28.24   10.25   8
  12 -14  -1   32.65   14.04   1
  12  14  -1   41.19   10.27   9
 -11 -14   1    4.28   13.35  10
 -11  14   1    5.01   17.80  11
  11 -14  -1   26.53   14.02   1
  11  14  -1    1.37   21.79   8
  10  14  -1   37.26    8.83   9
 -10  14   1   10.37   13.19  11
 -10 -14   1   42.20    8.12  10
  10  14  -1   44.78    8.97   8
  10 -14  -1   27.77   11.36   1
  10  14  -1   33.85    8.42  12
   9  14  -1  203.07   11.96  12
  -9  14   1  173.86   13.03  11
   9  14  -1  186.22   10.87   9
   9 -14  -1  182.27   15.88   1
  -9 -14   1  196.91   10.43  10
   9  14  -1  180.76   11.43   8
   8  14  -1   -0.68   63.60  12
   8  14  -1    7.11    7.95   9
   8 -14  -1    4.58    6.39   1
  -8  14   1   -0.85    1.85  11
   8  14  -1    1.69    5.63   8
   7  14  -1  243.07   13.79  12
   7  14  -1  268.29   12.64   8
   7  14  -1  269.32   11.76   9
  -7  14   1  234.54   12.33  12
   7 -14  -1  272.02   16.88   1
  -7  14   1  259.98   16.42   7
  -7  14   1  252.48   13.93  11
   6  14  -1    2.39   31.70   9
  -6  14   1   10.72    7.70  12
   6 -14  -1    5.56   10.90   1
   6  14  -1   12.96    8.93  12
  -6  14   1   15.55    7.19  11
   6  14  -1   13.05    7.93   8
  -6  14   1   44.16   13.07   7
   5  14  -1  133.40   10.22  12
  -5  14   1  138.68   10.45   3
   5  14  -1  124.52    8.59   8
   5 -14  -1  134.36   12.21   1
  -5  14   1  137.96   12.09   7
   5  14  -1  133.43    7.78   9
  -5  14   1  135.29    9.01  12
  -5  14   1  137.78   10.39  11
   4  14  -1   34.59    5.21   9
   4  14  -1   38.80    6.06   8
   4  14  -1   30.48    7.90  12
  -4  14   1   19.51    6.81  12
  -4 -14   1   45.98    7.25   2
  -4  14   1   54.77    8.35   7
  -4  14   1   39.54    8.14  11
   4  14  -1   30.67    6.04   3
  -4  14   1   45.37    7.23   3
  -3  14   1   27.09   10.24  11
   3  14  -1   41.69    7.15   3
  -3  14   1   43.08    8.49   7
   3  14  -1   41.16    5.66   8
  -3  14   1   27.28    7.82  12
   3  14  -1   37.33    5.00   9
  -3 -14   1   55.21    7.17   2
  -3  14   1   41.94    8.23   3
   3  14  -1   50.18    7.52  12
   2  14  -1    9.86    4.28   9
  -2  14   1   -1.16    3.47  12
   2  14  -1   18.71    4.95   8
  -2 -14   1    9.88    7.14   2
   2  14  -1   11.57    5.72   3
  -2  14   1    3.26   15.14  11
   2  14  -1    7.77    5.12  12
  -2  14   1   17.15    7.65   3
   2  14  -1   17.64    5.49  11
  -1  14   1  239.48   11.56   3
   1  14  -1  253.04   11.04   3
   1  14  -1  261.12   12.90  11
  -1  14   1  201.64    9.39   8
  -1  14   1  236.60   13.10  11
  -1  14   1  225.84   12.03  12
   1  14  -1  239.72   12.44  12
   1  14  -1  217.59    8.91   9
  -1 -14   1  243.98   11.62   2
   1  14  -1  232.91    9.99   8
   1 -14  -1  241.31    8.98  10
   0  14   1   39.81    7.94   3
   0  14  -1   44.03    7.70  12
   0  14  -1   33.50    9.97  11
   0  14   1   40.29    4.04   9
   0  14  -1   30.83    4.91   8
   0  14   1   37.33    4.87   8
   0 -14  -1   45.94    5.06  10
   0  14   1   42.94    7.95  12
   0  14   1   39.06   10.38  11
   0  14  -1   33.24    4.36   9
   0  14  -1   42.10    7.36   3
  -1  14  -1  203.17    9.30   8
   1  14   1  239.67   12.94  11
   1  14   1  244.52   12.05  12
   1  14   1  229.58    9.87   8
  -1  14  -1  243.59   11.32   3
  -1 -14  -1  232.14    9.32  10
  -1  14  -1  204.99    8.40   9
  -1  14  -1  241.22   12.76  11
   1  14   1  249.98   11.65   3
  -1 -14  -1  241.60   11.58   2
   1 -14   1  217.52    9.21   4
   1  14   1  222.09    8.66   9
  -1  14  -1  230.63   12.02  12
  -2  14  -1   22.14    7.93  12
  -2  14  -1   32.92    8.17   3
   2  14   1   29.80    7.35  12
   2  14   1   26.66    5.94   8
   2  14   1   32.52    8.10   3
  -2  14  -1   22.40   12.56  11
  -2 -14  -1   30.65    5.73  10
  -2 -14  -1   33.26    9.75   2
   2  14   1   26.59    4.67   9
  -3 -14  -1   19.03    6.55   2
   3  14   1   -2.16    4.47   8
   3  14   1    6.31    5.47   3
  -3  14  -1    3.06   19.87  11
  -3 -14  -1    3.29    3.89  10
   3  14   1   11.60    7.96  12
   4  14   1    5.34   12.56   9
  -4  14  -1   13.00    5.76  11
   4  14   1    1.15    6.51   8
   4  14   1    9.44    4.80   3
  -4  14  -1   14.00    8.28   3
  -4 -14  -1   13.51    6.51  10
  -4 -14  -1    0.98    4.89   2
   4  14   1    6.64    7.19  12
   5  14   1   15.83    8.10  12
  -5  14  -1   19.01    7.38  12
   5  14   1   27.05    6.09   9
  -5 -14  -1   19.24    6.53  10
  -5  14  -1   32.87    7.76  11
   5  14   1   30.75    6.07   3
   5  14   1   17.23    6.73   8
   6  14   1    6.17   12.24  12
  -6  14  -1   12.30    5.85  12
  -6  14  -1    2.31   14.49  11
  -6 -14  -1    9.17    6.25  10
   6  14   1    3.16    6.69   9
   6  14   1    2.65   11.81   8
   6 -14   1    8.86   12.26   1
   7 -14   1    3.94   11.23   1
   7  14   1    1.28    6.12   8
  -7 -14  -1   16.16    7.15  10
   7  14   1    1.62   50.86  12
  -7  14  -1   17.61   11.05  11
   7  14   1    6.15    9.61   9
   8 -14   1   57.72   12.26   1
   8  14   1   43.05    8.58   8
  -8  14  -1   47.60   10.55  11
  -8 -14  -1   43.13    7.61  10
   8  14   1   48.71    7.75   9
   8  14   1   63.86    9.03  12
   9  14   1   -2.07    3.22  12
  -9 -14  -1   -2.01   91.37  10
   9  14   1   -2.20    4.35   8
  10  14   1   26.14    9.03  12
  10 -14   1   19.16   11.55   1
 -10  14  -1    6.25   10.27  11
 -10 -14  -1   22.15    7.68  10
  10  14   1   25.48    9.64   8
  10  14   1   16.43    8.42   9
  11  14   1    1.00    3.38   9
  11 -14   1    9.56   11.34   1
  11  14   1    5.28  179.86   8
  12  14   1   33.97    8.39   9
  12 -14   1   28.94   16.00   1
 -12 -14  -1   18.17    9.14  10
  12  14   1   15.47   13.14   8
 -12  14  -1   20.00   13.08  11
 -13  14  -1    4.66   14.00  11
 -13 -14  -1   18.57    9.19  10
  13  14   1   11.64    8.47   9
  13 -14   1   35.08   14.80   1
 -14  14  -1    3.75   11.98  11
 -14 -14  -1   13.56    9.17  10
  14  14   1   25.68    9.45   9
  14  14   1   28.86    8.30   8
  15  14   1   12.26   11.86   9
 -15 -14  -1   14.15    9.68  10
  15  14   1   13.09   12.53   8
 -15  14  -1   -1.42   27.13  11
 -16 -14  -1   12.23   12.83  10
 -16 -15   1   42.12   11.41  10
 -15  15   1    3.58   17.29  11
  15  15  -1    0.66    4.04   9
  15  15  -1    8.78   12.77   8
 -15 -15   1   -1.49   84.42  10
  14  15  -1   31.51   10.19   9
  14  15  -1   24.34    8.64   8
 -14 -15   1   36.00    9.82  10
 -14  15   1   44.21   13.23  11
 -13  15   1   47.50   13.93  11
 -13 -15   1   49.74   10.53  10
  13  15  -1   34.45   10.35   8
  13  15  -1   33.68   12.48   9
  13 -15  -1   37.61   16.31   1
  12  15  -1    3.34    5.62   9
 -12 -15   1    4.57    7.27  10
 -12  15   1   19.13   11.03  11
  12 -15  -1   27.28   16.27   1
  11  15  -1   68.96    9.85   9
  11 -15  -1   64.94   14.83   1
  11  15  -1   78.20    9.88   8
 -11 -15   1   63.41    9.72  10
 -11  15   1   39.70   11.27  11
  10  15  -1   24.11    8.63  12
 -10  15   1   25.62   11.87  11
  10  15  -1   31.40    8.72   9
 -10 -15   1   24.63    8.26  10
  10  15  -1   17.77    9.89   8
  10 -15  -1   33.69   13.17   1
  -9  15   1   20.11   11.12  11
   9  15  -1    6.55   12.70  12
  -9 -15   1   16.11    7.73  10
   9  15  -1    3.56    8.21   9
   9  15  -1   17.06    7.60   8
   9 -15  -1   16.08   13.04   1
  -8  15   1  129.50   11.50  11
   8  15  -1  118.93    9.66   8
   8 -15  -1  127.60   13.78   1
   8  15  -1  121.50    9.57   9
  -8 -15   1  143.51    9.15  10
   8  15  -1  131.06   10.95  12
   7  15  -1   66.29    9.33  12
   7  15  -1   47.41    7.66   9
   7 -15  -1   76.48   11.38   1
  -7  15   1   51.79    7.35  12
  -7  15   1   57.84   10.33  11
   7  15  -1   64.64    7.68   8
   6  15  -1  116.82    9.83  12
   6 -15  -1  123.78   12.54   1
   6  15  -1  108.68    7.90   9
  -6  15   1   94.97    8.42  12
  -6  15   1  113.05   11.02  11
   6  15  -1  115.44    8.81   8
   5  15  -1  104.88    8.00   8
   5  15  -1  114.15    7.34   9
   5  15  -1  100.93    9.55  12
   5 -15  -1  108.74   12.00   1
  -5  15   1  103.79    8.88  12
  -5  15   1  136.13   11.20   7
  -5  15   1  120.86   10.26   3
  -5  15   1  122.58    9.88  11
  -4  15   1   57.93   10.38  11
  -4  15   1   45.02    7.55  12
   4  15  -1   50.38    6.58   8
  -4 -15   1   67.67    8.17   2
   4  15  -1   56.90    5.86   9
  -4  15   1   65.09    8.74   3
   4  15  -1   55.97    8.12  12
   3  15  -1  106.91    6.24   9
   3  15  -1  130.80    8.00   3
   3  15  -1  102.30    7.06   8
  -3  15   1   92.76    8.78  12
  -3  15   1  120.34    9.42   3
  -3  15   1  102.31   10.78  11
   3  15  -1   95.75    9.82  12
  -3 -15   1  116.93    8.79   2
   2  15  -1    1.74    3.63   8
  -2  15   1   20.49    7.93   3
   2  15  -1    9.16    6.27   3
  -2  15   1    4.07   30.23  11
   2  15  -1    1.79   33.02  12
   2  15  -1   12.39    3.97   9
  -2 -15   1   20.09    6.97   2
   1  15  -1   -0.82    3.29   8
   1  15  -1    5.68    6.47  11
   1  15  -1    7.99    4.09   9
  -1  15   1   11.32    6.70  12
   1  15  -1    4.53   11.37   3
  -1  15   1    7.73    8.02   3
   1 -15  -1    0.32    5.00  10
   0  15  -1   95.27    8.02   3
   0  15  -1   96.07    9.14  12
   0 -15  -1  100.98    9.02   2
   0  15  -1   91.77    5.17   9
   0 -15   1  106.28    8.68   2
   0  15   1  105.05    8.12   3
   0  15   1   99.81    9.77  11
   0  15  -1  101.01    9.55  11
   0  15   1  102.05    8.84  12
   0 -15  -1  104.98    6.10  10
   0  15   1   79.24    6.00   8
   0  15  -1   80.42    6.05   8
   1  15   1   66.71    8.66  11
  -1  15  -1   47.55    4.94   8
   1  15   1   73.45    8.46   3
   1  15   1   58.16    4.57   9
   1  15   1   50.72    5.20   8
   1 -15   1   49.94    2.94   4
  -1  15  -1   63.68    7.49   3
  -1 -15  -1   67.63    5.69  10
   1  15   1   54.84    8.69  12
  -1  15  -1   54.90    9.89  11
  -1  15  -1   62.92    7.74  12
  -1 -15  -1   66.10    8.81   2
  -2 -15  -1   85.71    8.56   2
   2  15   1   74.73    6.21   8
   2  15   1   66.84    9.03  12
  -2  15  -1   80.51    8.66   3
  -2 -15  -1   72.51    6.34  10
  -2  15  -1   60.80    7.92  12
   2  15   1   67.96    8.37   3
  -2  15  -1   81.57   10.21  11
   2  15   1   76.87    5.18   9
  -3 -15  -1  107.85    7.35  10
  -3  15  -1  133.70   10.54  11
   3  15   1  101.92    9.60  12
   3  15   1  132.26    8.73   3
   3  15   1   98.31    6.57   9
  -3  15  -1  110.81    9.30  12
  -3  15  -1  127.29    9.43   3
  -3 -15  -1  124.82    9.10   2
   3  15   1  113.56    7.60   8
  -4  15  -1   16.28    7.68  12
  -4 -15  -1   23.33    6.06  10
  -4 -15  -1   23.27    7.63   2
   4  15   1   22.38    7.98   8
  -4  15  -1   37.38    8.10  11
   4  15   1   24.09    7.16  12
   4  15   1   16.51    5.85   9
   4  15   1   26.76    6.92   3
  -5 -15  -1   -2.05    2.41  10
  -5  15  -1    5.59    8.19  11
   5  15   1    0.37    1.02  12
  -5  15  -1   -0.71    1.14  12
   5  15   1   -0.46    6.07   9
   5  15   1   -0.26    1.21   8
  -6 -15  -1    9.85    6.52  10
  -6  15  -1    8.27   10.30  11
   7 -15   1    6.14   12.62   1
   7  15   1    7.41   14.57   8
   7  15   1    5.84    9.15   9
   7  15   1    0.82   59.73  12
  -7 -15  -1    3.61    6.75  10
  -7  15  -1   11.44    7.03  11
  -8 -15  -1    4.37    8.70  10
   8 -15   1   -2.06    8.74   1
   8  15   1   14.65    7.70   9
   8  15   1    0.22    0.44  12
  -9  15  -1   51.86   11.41  11
  -9 -15  -1   57.60    8.05  10
   9  15   1   63.41    8.64  12
   9 -15   1   56.84   12.46   1
   9  15   1   54.66    8.46   9
   9  15   1   61.47    9.66   8
 -10 -15  -1   12.38   10.67  10
  10  15   1   19.60    7.64  12
  10  15   1   23.36    8.10   9
 -10  15  -1    7.28   10.93  11
  10  15   1   15.29    8.41   8
  10 -15   1    7.54   11.88   1
  11 -15   1   43.77   14.28   1
 -11 -15  -1   27.53    9.36  10
  11  15   1   15.67    8.94   9
  11  15   1    7.94    6.51   8
 -12  15  -1    3.94   57.47  11
  12  15   1   23.73   11.69   8
 -12 -15  -1   22.04   10.21  10
  12 -15   1   21.10   15.45   1
  12  15   1   11.24   12.51   9
 -13 -15  -1    6.51   14.09  10
  13  15   1   20.70   11.12   9
 -13  15  -1    2.88   10.74  11
  13 -15   1   43.71   16.73   1
  13  15   1    8.86    6.70   8
  14 -15   1   53.16   18.34   1
 -14 -15  -1   27.90   10.51  10
  14  15   1   26.35   10.61   9
 -14  15  -1   19.07   12.95  11
  14  15   1   33.12   10.47   8
  15  15   1   12.51   10.20   9
 -15  15  -1   14.49   14.18  11
 -15 -15  -1    3.75    4.22  10
  15  15   1   24.00   11.18   8
  15  16  -1   35.82   11.56   9
 -15 -16   1    8.24    9.72  10
  15  16  -1   16.69   11.89   8
 -15  16   1    3.75   13.13  11
  14  16  -1   30.11   12.11   9
  14  16  -1   31.70   10.03   8
 -14 -16   1   52.39   11.07  10
 -14  16   1   29.24   15.23  11
  13 -16  -1   51.03   16.56   1
  13  16  -1   16.33   11.56   8
  13  16  -1    8.35   11.54   9
 -13 -16   1   10.18    7.84  10
  12 -16  -1  115.92   17.69   1
  12  16  -1   96.69   11.52   9
 -12  16   1   98.09   13.40  11
  12  16  -1   82.61   11.21   8
 -12 -16   1   93.24   10.29  10
  11 -16  -1    8.47   11.98   1
 -11 -16   1    7.58    9.31  10
  10  16  -1   69.23   10.02  12
  10 -16  -1   93.21   15.04   1
  10  16  -1   72.58   10.14   9
 -10  16   1   66.73   11.72  11
 -10 -16   1   72.81    9.39  10
  10  16  -1   73.12    9.89   8
   9  16  -1   37.47    9.36   8
  -9 -16   1   58.42    8.68  10
   9  16  -1   24.05    8.12   9
   9 -16  -1   35.48   12.63   1
  -9  16   1   13.30    9.11  11
   9  16  -1   22.60    7.69  12
   8  16  -1   13.18    8.52   8
   8 -16  -1    2.33   44.88   1
  -8 -16   1   13.02    6.65  10
  -8  16   1    1.07    5.26  11
   8  16  -1    3.85   36.62  12
   7 -16  -1   13.20   10.91   1
  -7 -16   1   21.45    6.98  10
  -7  16   1   10.83    8.08  12
   7  16  -1    3.63  118.13  12
  -7  16   1   26.15    7.66  11
   7  16  -1   34.89    8.14   9
   7  16  -1   49.56    8.36   8
  -6 -16   1   56.63    7.55  10
   6  16  -1   52.29    7.26   8
  -6  16   1   56.35    7.99  12
   6  16  -1   64.92    9.55  12
   6  16  -1   61.84    7.16   9
   6 -16  -1   66.31   11.51   1
  -6  16   1   65.81    9.49  11
  -5  16   1   47.08    7.85  12
  -5  16   1   68.78    9.51   3
   5  16  -1   39.89    9.40  12
   5  16  -1   53.87    6.87   8
  -5  16   1   60.40   10.09  11
   5 -16  -1   51.57   10.77   1
   5  16  -1   51.42    6.69   9
   4 -16  -1   98.41   11.58   1
  -4  16   1   96.61   11.17  11
   4  16  -1  103.38    6.55   9
   4  16  -1   96.60    7.45   8
  -4 -16   1  123.25    9.09   2
   4  16  -1   95.03    9.90  12
  -4  16   1   93.52    9.02  12
  -4  16   1  110.73    9.63   3
   3  16  -1   36.58    5.69   8
   3  16  -1   43.87    5.21   9
  -3  16   1   42.01   10.53  11
  -3 -16   1   57.65    8.34   2
   3  16  -1   20.67    9.23  12
  -3  16   1   38.83    7.59  12
  -3  16   1   48.84    9.67   3
   2  16  -1  111.97    6.18   9
   2  16  -1  103.09    9.41  12
  -2  16   1  121.42   10.68  11
  -2 -16   1  130.62    9.29   2
   2  16  -1  116.43    8.39   3
   2  16  -1  107.49    7.28   8
  -2  16   1  134.10    9.40   3
  -2  16   1   97.02    9.67  12
   1  16  -1    5.77    5.11   8
  -1  16   1   28.08    6.90   3
   1  16  -1   15.91    4.05   9
  -1  16   1   23.60    7.26  11
  -1 -16   1   14.03    7.65   2
   1  16  -1   11.57    4.71   3
   1  16  -1    6.55    9.40  12
  -1  16   1   11.24   10.01  12
   1  16  -1   25.26    6.92  11
   0 -16  -1    7.35    6.56   2
   0  16   1    3.85    3.89   8
   0 -16   1    3.69    6.26   2
   0  16  -1   12.01    5.01   3
   0  16  -1   12.97    5.82  11
   0  16   1   12.98    4.09   3
   0  16   1   20.96    7.44  11
   1  16   1    6.52   10.10  12
   1  16   1   17.82   10.21  11
  -1 -16  -1   15.25    5.09  10
   1  16   1    2.60    8.97   3
  -1  16  -1   13.52   11.45   3
  -1 -16  -1    9.60    9.70   2
   1  16   1    3.35    4.42   8
  -1  16  -1   15.36    6.65  11
  -2 -16  -1   10.39    6.06   2
  -2  16  -1   14.70    7.60   3
  -2 -16  -1   15.66    5.90  10
  -2  16  -1   11.39   17.28  11
   2  16   1    7.16    6.96   8
   2  16   1   17.25    9.32   3
  -2  16  -1    4.21   16.48  12
   2  16   1    7.64    4.49   9
  -3 -16  -1   93.12    8.68   2
   3  16   1   83.41    9.30  12
  -3 -16  -1   87.34    6.69  10
   3  16   1   79.31    6.86   8
  -3  16  -1   80.21    9.41   3
  -3  16  -1   84.97   10.50  11
   3  16   1   88.32    8.32   3
  -3  16  -1   72.53    8.33  12
   3  16   1   80.62    5.88   9
  -4 -16  -1   32.02    5.98  10
  -4  16  -1   15.22    7.48  12
   4  16   1   19.29    6.33   8
   4  16   1   20.69   10.88  12
  -4 -16  -1   39.91    8.08   2
   4  16   1   14.85    5.42   9
  -4  16  -1   23.33   11.54  11
  -5  16  -1   42.35    7.84  12
   5  16   1   40.99    9.00  12
   5  16   1   38.78    6.77   9
   5 -16   1   32.27   10.96   1
  -5  16  -1   62.85    9.10  11
   5  16   1   28.93    7.28   8
  -5 -16  -1   38.61    6.98  10
   6  16   1    3.31   78.59   9
  -6 -16  -1    6.09    8.34  10
  -6  16  -1   -0.65   11.23  12
   6  16   1    9.97    9.40  12
  -7 -16  -1   56.91    7.90  10
   7  16   1   54.61    7.77   9
   7  16   1   41.25    8.25   8
  -7  16  -1   46.15    9.80  11
   7 -16   1   44.07   11.80   1
   7  16   1   34.26    9.96  12
   8  16   1    6.38   13.11   8
   8  16   1    9.55    6.52  12
   8 -16   1   -0.98    6.44   1
  -8 -16  -1   15.50    7.78  10
  -8  16  -1    1.22   20.84  11
   8  16   1    1.49    9.83   9
   9  16   1    3.76    8.78   8
   9 -16   1   15.87   12.18   1
   9  16   1    2.86    4.12  12
  -9  16  -1   13.60    7.87  11
   9  16   1   21.20    8.16   9
  -9 -16  -1   22.52    8.49  10
  10  16   1   15.80    8.30  12
  10 -16   1   14.61   13.51   1
  10  16   1   15.70    9.46   8
 -10  16  -1    9.05    9.78  11
 -10 -16  -1   11.97    8.53  10
  10  16   1    1.20    5.27   9
  11  16   1   30.82    9.99   9
  11 -16   1   48.97   16.01   1
 -11  16  -1   32.37   13.75  11
  11  16   1   42.06   10.35   8
 -11 -16  -1   27.92    9.63  10
 -12 -16  -1   22.85   10.31  10
  12  16   1   10.62   17.22   9
  12 -16   1   32.25   15.65   1
 -12  16  -1   10.07   17.26  11
  13 -16   1   80.90   17.23   1
  13  16   1   55.92   10.68   8
  13  16   1   64.26   11.31   9
 -13 -16  -1   58.73   10.70  10
 -13  16  -1   45.67   12.94  11
  14  16   1    1.31    4.65   9
 -14  16  -1    2.72    9.03  11
  14  16   1   18.27   11.35   8
  14 -16   1   19.24   14.20   1
 -14 -16  -1    4.01    8.24  10
 -15 -16  -1    8.57    9.85  10
  15  16   1   16.64   14.52   9
 -15 -17   1    5.58    8.22  10
 -14  17   1   15.76   12.55  11
  14  17  -1   11.46   13.23   9
  14  17  -1    8.32   11.57   8
 -14 -17   1   18.24   11.78  10
  13  17  -1   27.30    9.77   9
 -13  17   1   24.61   12.25  11
 -13 -17   1   28.63   10.39  10
  13  17  -1   12.54   11.60   8
  13 -17  -1   44.11   15.79   1
 -12  17   1   25.88   13.95  11
  12 -17  -1   25.41   14.84   1
  12  17  -1   15.23   11.10   9
 -12 -17   1   12.27   10.45  10
  11 -17  -1   35.63   13.47   1
 -11 -17   1   26.14    8.64  10
  11  17  -1   15.21   10.47   9
 -11  17   1   19.60   11.27  11
  11  17  -1    4.32    7.40  12
  11  17  -1    2.60   18.50   8
  10  17  -1   38.52    9.93   9
  10  17  -1   20.91    8.99   8
  10  17  -1   26.71   11.18  12
  10 -17  -1   53.83   13.75   1
 -10  17   1   33.59   11.76  11
 -10 -17   1   35.18    9.62  10
  -9  17   1   17.09   11.53  11
   9 -17  -1   24.56   12.93   1
   9  17  -1    3.14   75.17   8
  -9 -17   1   29.29    9.35  10
   9  17  -1   15.10    7.27   9
   8 -17  -1   66.36   13.76   1
  -8  17   1   78.00   11.11  11
  -8 -17   1   71.74    8.30  10
   8  17  -1   84.49    8.72   9
   8  17  -1   53.28    9.33  12
   8  17  -1   57.47    9.02   8
  -7  17   1   18.64    9.52  11
  -7 -17   1    2.24   48.22  10
   7  17  -1   -2.17   12.12   8
   7  17  -1    0.03    0.31  12
   7  17  -1   26.74    7.17   9
   6 -17  -1   21.16   10.39   1
  -6  17   1   30.44    8.82  11
   6  17  -1   31.38    7.02   9
   6  17  -1   34.52    8.04   8
  -6 -17   1   41.48    7.68  10
  -6  17   1   14.01    8.09  12
   6  17  -1   22.63   10.97  12
   5  17  -1   37.67    7.41   8
   5 -17  -1   30.70   12.14   1
  -5  17   1   40.12   10.91  11
   5  17  -1   45.98    6.26   9
   5  17  -1   23.19   10.69  12
  -5  17   1   28.16   10.88   3
  -5  17   1   24.78    7.74  12
  -5 -17   1   48.79    7.33  10
  -4 -17   1   14.38    8.29   2
   3  17  -1   38.71    5.22   9
  -3  17   1   33.22    8.25  12
  -3  17   1   50.39   10.58   3
   3  17  -1   42.68    9.04  12
   3  17  -1   41.91    6.25   8
  -3 -17   1   59.89    8.42   2
  -3  17   1   46.17   11.67  11
  -2 -17   1   47.33    8.21   2
  -2  17   1   42.47    8.27   3
   2  17  -1   24.37    5.74   8
  -2  17   1   21.93    8.52  12
   2  17  -1   17.39   10.09  12
  -2  17   1   36.15    9.95  11
  -1  17   1   48.19    8.42  12
  -1  17   1   72.86   10.05  11
  -1 -17   1   62.97    6.05  10
   1  17  -1   58.76    9.04  11
   1  17  -1   56.95    7.89   3
  -1 -17   1   60.35    9.24   2
   1  17  -1   46.50    9.09  12
  -1  17   1   68.06    8.47   3
   1  17  -1   42.71    5.87   8
   0 -17  -1   57.08    8.70   2
   0 -17   1   37.66    7.95   2
   0  17   1   52.99    9.22  11
   0  17  -1   38.11    9.39  12
   0  17   1   46.06    9.18  12
   0  17  -1   47.74    9.14  11
   0  17  -1   49.63    7.70   3
   0  17   1   56.89    8.07   3
   1  17   1    6.35   10.40  12
  -1  17  -1    9.37   13.28  12
  -1  17  -1   21.10    7.23   3
   1  17   1   22.64    7.52   3
   1  17   1    9.61    5.69   8
  -1 -17  -1   13.53   10.73   2
  -1 -17  -1   11.32    5.57  10
  -1  17  -1   13.39    8.99  11
   1  17   1   19.92    9.18  11
  -2  17  -1    7.39   14.97   3
  -2 -17  -1   10.55    8.97   2
  -2 -17  -1    5.44    5.82  10
  -2  17  -1    3.33   12.25  11
   2  17   1    3.83    3.97   3
  -3  17  -1    7.96    6.07   3
  -3 -17  -1    2.99    4.83  10
  -3 -17  -1   21.76    8.19   2
   3  17   1    4.33    4.53   9
   4  17   1   32.44    8.96  12
  -4 -17  -1   46.56    8.52   2
  -4  17  -1   26.05   10.47  11
   4  17   1   37.09    5.59   9
  -4 -17  -1   45.16    6.80  10
   4  17   1   31.61    7.08   8
  -4  17  -1   28.42    9.06  12
   5  17   1   35.55    9.29  12
  -5  17  -1   44.69   10.68  11
  -5  17  -1   23.51    8.03  12
   5 -17   1   30.96   12.83   1
   5  17   1   41.11    6.39   9
   5  17   1   31.21    7.30   8
  -5 -17  -1   45.79    7.61  10
   6 -17   1   61.19   11.67   1
  -6  17  -1   31.78    7.97  12
   6  17   1   75.47   10.26  12
   6  17   1   67.83    7.52   9
  -6 -17  -1   62.00    7.69  10
   6  17   1   39.72    8.04   8
  -6  17  -1   50.59    9.40  11
   7  17   1   73.51    8.83   8
   7  17   1   70.79    9.94  12
  -7  17  -1   78.15   10.77  11
   7 -17   1   76.72   13.23   1
   7  17   1   93.82    8.53   9
  -7 -17  -1   85.43    8.46  10
   8  17   1    3.66    6.07   8
  -8  17  -1   11.07   10.97  11
  -8 -17  -1    3.74   10.57  10
   8  17   1    2.83   17.73  12
   8  17   1   -1.40   17.14   9
  -9  17  -1   32.20   12.00  11
   9  17   1   25.34    9.25  12
   9  17   1   29.84   10.10   8
  -9 -17  -1   41.86    9.36  10
   9 -17   1   36.00   15.05   1
   9  17   1   37.53    9.31   9
 -10  17  -1   54.73   11.85  11
  10  17   1   56.42   10.43   8
  10 -17   1   66.82   16.07   1
 -10 -17  -1   66.29    9.45  10
  10  17   1   57.44   10.66  12
  10  17   1   41.38    9.84   9
  11  17   1   14.80   10.72   8
  11  17   1   17.91   12.50   9
 -11  17  -1   22.54   11.12  11
  11 -17   1   15.74   14.30   1
 -11 -17  -1   19.89    9.92  10
 -12  17  -1   44.07   12.97  11
  12 -17   1   82.68   16.54   1
  12  17   1   49.74   11.25   9
 -12 -17  -1   65.41   10.32  10
  12  17   1   62.92   11.47   8
  13  17   1    7.17   21.27   8
 -13  17  -1   16.41   11.92  11
  13  17   1   -2.23   11.02   9
 -13 -17  -1    6.84    7.69  10
  13 -17   1   17.05   15.07   1
  14  17   1   27.98   10.52   8
 -14 -17  -1   35.37   11.01  10
  14  17   1   24.78   12.62   9
 -14  17  -1   17.04   13.49  11
  14 -17   1   57.10   19.71   1
 -15 -17  -1   12.29   11.82  10
  13 -18  -1   22.52   15.16   1
 -13 -18   1   10.79   10.47  10
  13  18  -1    0.37   62.35   8
  13  18  -1   14.95   12.04   9
  12  18  -1    5.79    7.78   8
  12  18  -1    4.31   22.42   9
 -12 -18   1   11.69    8.93  10
 -12  18   1   22.08   12.70  11
  12 -18  -1   17.45   18.87   1
  11  18  -1    6.98    8.36   9
 -11  18   1   23.48   12.13  11
  11 -18  -1   31.05   12.73   1
 -11 -18   1   15.14   10.07  10
  11  18  -1   46.23   11.00   8
  10 -18  -1   16.99   14.17   1
 -10 -18   1   10.60   10.58  10
 -10  18   1    3.24   13.33  11
  10  18  -1    1.00   18.02   9
  -9 -18   1   55.55    9.22  10
   9  18  -1   53.40    9.32   9
   9  18  -1   40.81    9.71   8
   9  18  -1   41.75   11.27  12
  -9  18   1   69.90   11.63  11
   9 -18  -1   75.75   14.11   1
   8  18  -1    4.51    8.21   9
   8 -18  -1    9.51   10.29   1
  -8  18   1   -1.12    6.91  11
   7 -18  -1   74.29   12.75   1
  -7  18   1   74.20   11.16  11
  -7 -18   1   55.40    8.51  10
   7  18  -1   73.82   10.67  12
  -7  18   1   52.97    9.09  12
   7  18  -1   42.94    8.87   8
   7  18  -1   56.19    8.03   9
   6  18  -1   13.90    9.38  12
  -6  18   1   -2.21    8.51  11
  -6 -18   1   23.15    8.12  10
   6 -18  -1   15.75   11.70   1
   6  18  -1   22.29    6.02   9
  -6  18   1    9.01    9.10  12
   6  18  -1    7.63    8.22   8
   5  18  -1   18.85    6.29   9
  -5  18   1    5.42    9.39  12
   5 -18  -1   -1.61    6.78   1
  -5 -18   1   12.93    8.17  10
  -5  18   1    9.72   14.76  11
   5  18  -1    2.82  325.73  12
  -4 -18   1   42.41    7.42  10
  -4 -18   1   22.32    7.68   2
  -4  18   1   -0.93   27.53  12
   4  18  -1   19.64    5.56   9
   4 -18  -1   -0.62    8.54   1
  -4  18   1    2.29    3.81  11
   4  18  -1   18.29    7.10   8
   4  18  -1    5.19    9.11  12
  -4  18   1   26.32    9.29   3
  -3  18   1   31.45    9.60  11
   3  18  -1   11.30    8.51  12
  -3 -18   1   31.65    6.95  10
  -3  18   1   14.19    8.06  12
  -3  18   1   30.71    7.98   3
  -3 -18   1   48.72    8.54   2
   3  18  -1   13.45    6.18   8
  -2 -18   1   41.87    8.28   2
  -2 -18   1   37.46    6.61  10
   2  18  -1   19.80    5.84   8
  -2  18   1   35.02    8.52  11
  -2  18   1   28.35   10.00   3
   2  18  -1   15.97    9.83  12
  -2  18   1   26.36    8.34  12
  -1  18   1   62.96    9.63  12
  -1  18   1   83.16   10.68  11
   1  18  -1   94.38   10.51  11
   1 -18  -1   79.42   10.22   2
   1  18  -1   54.29    9.78  12
  -1  18   1   79.23    9.03   3
  -1 -18   1   76.22    9.81   2
   0  18   1   69.57    8.62   3
   0  18   1   78.68   10.05  11
   0 -18   1   58.66   10.07   2
   0  18   1   47.31    9.33  12
   0  18  -1   62.69    7.93   3
   0  18  -1   69.54    9.37  11
   0 -18  -1   74.64    9.98   2
   0  18  -1   32.92    9.21  12
  -1 -18  -1   17.20   11.10   2
   1 -18   1   20.51   10.77   2
  -1  18  -1   29.81    7.49   3
   1  18   1   15.83   12.99  11
   1  18   1   27.07    8.27   3
   1  18   1   16.68    7.54  12
  -1  18  -1    8.43    9.93  12
  -1  18  -1   14.93    9.10  11
  -2 -18  -1   93.60    7.27  10
  -2  18  -1   79.62    9.79  12
  -2 -18  -1   98.45    9.71   2
   2  18   1   87.03   10.63  12
  -2  18  -1   92.06   11.34  11
  -2  18  -1  107.71    9.42   3
   2  18   1   88.92    7.29   8
  -3  18  -1   11.87    8.29  12
  -3 -18  -1    3.38    7.70  10
   3  18   1    9.50    6.02   8
  -3  18  -1   13.47    8.13  11
  -3 -18  -1   16.46    8.92   2
  -3  18  -1   19.96    8.60   3
  -4 -18  -1   -0.36    8.23  10
  -4 -18  -1   20.07    7.45   2
   5  18   1   12.68   10.22  12
  -5  18  -1   14.80   13.08  11
  -5 -18  -1   16.06    6.32  10
   5  18   1    1.59    3.55   8
  -5  18  -1    4.81    9.87  12
   5  18   1   28.32    6.40   9
  -6 -18  -1   73.70    8.28  10
   6  18   1   84.79    7.93   9
  -6  18  -1   69.28   11.57  11
   6 -18   1   57.50   13.68   1
   6  18   1   57.00    8.14   8
   6  18   1   62.53   10.34  12
  -7  18  -1   31.55    8.21  11
   7 -18   1    2.94   26.10   1
   7  18   1   15.19    8.58   9
  -7 -18  -1   16.50    9.08  10
   7  18   1   -1.93    5.56   8
   7  18   1    6.13    9.33  12
  -8  18  -1  123.11   12.28  11
   8  18   1  110.01    9.96   9
  -8 -18  -1  119.87    9.94  10
   8  18   1  125.65   11.78  12
   8 -18   1  126.18   15.53   1
   8  18   1   88.85   10.33   8
  -9  18  -1    6.26   16.17  11
   9 -18   1    2.30   16.91   1
   9  18   1    0.03    0.30  12
   9  18   1    0.47    1.99   9
 -10  18  -1   70.61   12.72  11
 -10 -18  -1   46.79    9.74  10
  10  18   1   61.37   10.86   8
  10  18   1   54.43   11.52  12
  10 -18   1   73.18   16.54   1
  10  18   1   51.52   10.66   9
 -11  18  -1   23.26   11.47  11
  11  18   1   19.14    9.36   9
  11 -18   1   45.34   15.85   1
  11  18   1   28.59   10.53   8
 -11 -18  -1   34.17    9.38  10
  12 -18   1   14.54   13.58   1
  12  18   1    8.61    9.64   8
 -12 -18  -1   14.33    9.68  10
  12  18   1    5.61   12.96   9
 -12  18  -1    9.20    9.86  11
 -13 -18  -1   13.26   11.76  10
  13 -18   1   34.02   16.99   1
 -13  18  -1   14.09   11.70  11
  13  18   1   17.74    9.65   8
  13  18   1   15.32   10.15   9
 -14 -18  -1   15.32   12.20  10
  13  19  -1    7.99   15.27   8
 -13 -19   1   10.68    9.34  10
 -13  19   1    7.77   16.99  11
  13  19  -1   -1.77   11.12   9
  12 -19  -1   26.26   13.45   1
  12  19  -1    7.80    9.51   8
 -12  19   1   -0.97   14.43  11
 -12 -19   1   24.07    9.64  10
 -11  19   1   14.25   11.62  11
 -11 -19   1   16.49   10.73  10
  11 -19  -1   35.02   16.01   1
  11  19  -1   11.57   17.94   8
 -10 -19   1    3.17   16.85  10
  10 -19  -1   17.05   16.41   1
  10  19  -1    8.01   10.24   8
  10  19  -1    8.30   11.70  12
 -10  19   1   23.70   11.14  11
  10  19  -1   -1.59    4.83   9
  -9  19   1   25.04   10.58  11
   9 -19  -1   28.95   13.11   1
  -9 -19   1   15.22   11.94  10
   9  19  -1    8.19    9.53   9
   9  19  -1   -0.15   10.15   8
  -8 -19   1    5.74   11.22  10
   8  19  -1    1.72   98.57   8
   8 -19  -1   26.77   12.36   1
   8  19  -1   12.25    8.24   9
   8  19  -1    5.68    8.73  12
  -7  19   1   13.92   14.35  11
   7  19  -1   23.03    8.52   9
   7 -19  -1   19.31   13.83   1
   7  19  -1   11.35   10.64   8
  -7 -19   1   -1.37    5.02  10
   6  19  -1   11.50    8.75   8
  -6  19   1    3.98   10.09  12
  -6 -19   1   15.78    9.50  10
   6  19  -1   14.22    7.44   9
   6  19  -1    2.39   16.00  12
   6 -19  -1   10.22    8.27   1
  -5 -19   1   46.59    8.05  10
   5  19  -1   21.73   11.24  12
  -5  19   1   25.82   12.60  11
   5 -19  -1   14.59   12.30   1
   5  19  -1   22.80    8.35   8
   5  19  -1   41.57    6.78   9
  -5  19   1   17.82    8.77  12
   4  19  -1    4.18    6.28   8
  -4 -19   1   22.47    7.39  10
  -4  19   1    9.14   10.16  11
  -4 -19   1   13.56    9.01   2
  -4  19   1   25.88    9.48   3
  -3 -19   1    9.92    9.60   2
  -3  19   1    1.53    9.83  11
  -3 -19   1   16.00    6.73  10
  -3  19   1   12.90    9.71   3
  -2 -19   1    5.68    8.94   2
  -2  19   1   10.44    8.26   3
  -1  19   1   48.15    9.05   3
   1  19  -1   36.77   10.62  12
   1  19  -1   58.51   10.81  11
   1 -19  -1   40.88    9.67   2
  -1 -19   1   40.25    9.88   2
  -1  19   1   50.84   11.11  11
  -1  19   1   42.96    9.28  12
   0  19  -1   25.52    8.08  11
   0 -19   1    9.54    8.72   2
   0  19   1    9.87    7.47   3
   0  19   1   26.57    8.72  11
   0 -19  -1   -1.74    5.73   2
   0  19   1   -2.42    5.08  12
   0  19  -1   12.31   11.33  12
  -1  19  -1   59.62    9.62  12
  -1 -19  -1   70.18   10.07   2
   1 -19   1   63.81    9.77   2
  -1  19  -1   79.08   11.54  11
   1  19   1   59.20   10.79  12
  -1  19  -1   74.66    8.47   3
  -2  19  -1   55.60   11.21  11
  -2  19  -1   33.56    9.46  12
   2  19   1   40.78   10.82  12
  -2 -19  -1   59.63    7.18  10
  -2 -19  -1   46.26    9.85   2
  -2  19  -1   58.28    9.00   3
   3  19   1   22.85    7.19   8
  -3  19  -1   27.79   11.48  11
  -3 -19  -1   37.95    6.57  10
  -3 -19  -1   51.56    9.69   2
   3  19   1   26.93   11.21  12
  -3  19  -1   23.68    9.55  12
  -4  19  -1   36.46    8.65  12
   4  19   1   47.10    7.65   8
  -4  19  -1   64.27   11.68  11
   4  19   1   60.37   10.05  12
  -4 -19  -1   72.06    9.77   2
  -4 -19  -1   73.73    7.73  10
  -5 -19  -1    9.13    9.86  10
   6  19   1   61.10    7.67   9
   6  19   1   61.55   11.36  12
  -6 -19  -1   47.99    8.75  10
  -6  19  -1   36.09   12.33  11
   6 -19   1   23.76   13.85   1
   6  19   1   46.91    8.52   8
   7  19   1   19.72    9.57  12
   7  19   1   10.06    9.43   8
   7 -19   1   25.26   13.45   1
  -7  19  -1   28.91   12.04  11
  -7 -19  -1   38.38    9.17  10
   7  19   1   45.63    9.20   9
  -8  19  -1   22.86   11.69  11
   8 -19   1   20.61   13.74   1
  -8 -19  -1    5.50    8.60  10
   8  19   1    5.29   10.62  12
   8  19   1   -1.48    5.02   9
   9  19   1   37.53    9.75   9
   9  19   1   37.45   10.43   8
   9 -19   1   45.02   14.17   1
  -9  19  -1   57.09   12.01  11
  -9 -19  -1   37.00    9.63  10
   9  19   1   46.92   12.87  12
 -10 -19  -1    1.86    5.68  10
  10  19   1   11.76    8.95  12
  10 -19   1   36.63   15.89   1
  10  19   1    8.59    9.03   9
 -10  19  -1   30.39   12.33  11
  10  19   1    9.69    8.04   8
  11  19   1   14.77   11.37   9
  11 -19   1   33.34   16.15   1
  11  19   1   22.59   11.94   8
 -11  19  -1   19.95   13.39  11
 -11 -19  -1   26.27    9.59  10
  12  19   1   27.12   12.84   9
 -12  19  -1   30.14   13.13  11
  12  19   1   34.94   11.20   8
 -12 -19  -1   20.66    9.52  10
  12 -19   1   50.28   17.69   1
  13 -19   1   18.66   16.11   1
 -13 -19  -1    7.01    9.32  10
 -13 -20   1    7.22   12.87  10
 -12 -20   1    6.55   10.36  10
  12 -20  -1   -2.27   13.84   1
 -12  20   1   12.32   16.09  11
  12  20  -1    7.12   17.61   8
  12  20  -1    6.99   11.33   9
 -11 -20   1    9.06   10.02  10
  11 -20  -1    4.22   10.86   1
  11  20  -1   -2.61    9.92   9
 -11  20   1   31.65   11.97  11
 -10 -20   1    2.47   16.38  10
  10  20  -1    6.49   10.87   9
  10  20  -1   -0.93   10.82  12
 -10  20   1   24.39   10.03  11
  10  20  -1   12.28    9.08   8
  10 -20  -1   22.09   13.02   1
  -9 -20   1    8.41    9.84  10
   9 -20  -1   11.17   15.57   1
   9  20  -1   -2.04   14.08   9
   9  20  -1    4.44   35.49  12
   9  20  -1    5.51    7.56   8
  -8 -20   1   28.50   10.19  10
  -8  20   1    3.07  258.98  11
   8  20  -1    6.07   26.39  12
   8  20  -1    9.47   11.16   8
   8  20  -1   17.23    8.30   9
   8 -20  -1   22.01   12.08   1
   7  20  -1   -0.74    5.91   8
  -7 -20   1    2.42   15.11  10
   7 -20  -1    4.46    9.26   1
   7  20  -1    3.32    9.75   9
   7  20  -1    5.94   11.46  12
   6  20  -1    8.03    7.85   8
  -6 -20   1    4.32    5.45  10
   6 -20  -1    7.81   12.47   1
   6  20  -1   14.77   18.92  12
   5  20  -1   29.44   11.58  12
   5 -20  -1   42.01   11.22   1
  -5 -20   1   54.38    8.39  10
  -5  20   1   46.63   12.70  11
   5  20  -1   39.36    8.85   8
  -5  20   1   32.07    9.46  12
  -4  20   1   11.57   10.57   3
   4  20  -1    9.71    7.17   8
   4  20  -1   19.47   11.52  12
  -4 -20   1   22.26    7.19  10
  -4 -20   1   34.41   10.13   2
  -4  20   1   16.42   14.50  11
  -3 -20   1   98.83    8.45  10
  -3  20   1   79.83   11.05  12
  -3 -20   1  101.16   10.97   2
  -3  20   1  101.79   10.54   3
  -3  20   1   91.42   11.53  11
   3  20  -1   83.48   11.73  12
   3  20  -1   61.10    8.07   8
  -2 -20   1   20.09    9.93   2
  -2  20   1   12.72    6.92  11
  -2  20   1   12.15    9.15   3
   2  20  -1    1.01    8.70  12
  -1  20   1   42.69    8.99   3
   1 -20  -1   24.41   11.10   2
  -1  20   1   50.78   10.14  11
   1  20  -1   27.69   10.60  12
  -1 -20   1   25.81   10.48   2
  -1  20   1   21.84   10.60  12
   0 -20  -1   21.43    9.47   2
   0  20   1   33.38    8.60  11
   0  20  -1   52.83    9.42  11
   0 -20   1   19.99   11.23   2
   0  20  -1   21.18    8.55  12
   0  20   1   27.14    9.07  12
  -1  20  -1   17.62    8.48  11
   1  20   1   18.88    9.84  12
  -1 -20  -1   21.65   11.78   2
   1 -20   1   31.88    9.60   2
  -1  20  -1   10.61    9.32  12
  -2  20  -1   17.98    9.55  12
  -2  20  -1   21.50    7.96   3
  -2  20  -1   32.77   10.68  11
   2  20   1   13.59   12.13  12
  -2 -20  -1   30.84   10.48   2
  -3  20  -1  102.09   10.84  12
   3  20   1   84.64    8.52   8
  -3 -20  -1  119.03   11.08   2
   3  20   1  102.83   11.70  12
  -3 -20  -1  103.35    8.36  10
  -3  20  -1  106.97   12.94  11
   4  20   1    6.18    9.70   8
  -4 -20  -1   33.28    9.80   2
  -4  20  -1    5.68   13.35  11
   4 -20   1   -0.43    3.75   1
  -4  20  -1   13.88    8.81  12
   4  20   1   -2.33    6.17  12
  -4 -20  -1   29.86    7.21  10
  -5 -20  -1  145.30    9.55  10
  -5  20  -1  138.43   14.10  11
  -5  20  -1  128.13   11.63  12
   5  20   1  128.20   13.32  12
   5  20   1  122.45    9.97   8
   5 -20   1  131.07   14.64   1
   6  20   1    1.45    3.75   8
  -6 -20  -1   26.01    9.10  10
   6  20   1    5.59    8.65  12
   6 -20   1    7.44    9.82   1
   7  20   1   33.07    9.96   8
   7  20   1   21.85   12.28  12
   7 -20   1   24.46   14.14   1
  -7 -20  -1   44.04    9.61  10
  -7  20  -1   13.45   12.10  11
   8  20   1    4.24   11.01  12
   8  20   1   21.45    9.47   9
   8  20   1    4.84   10.73   8
   8 -20   1   14.20   13.48   1
  -8 -20  -1   27.70    8.59  10
  -8  20  -1   11.53    7.68  11
   9 -20   1    5.34   17.34   1
   9  20   1   -1.38    3.35   8
  -9 -20  -1   10.66    9.72  10
  -9  20  -1   40.97   11.92  11
   9  20   1    8.62   11.49  12
 -10 -20  -1   21.13    9.65  10
  10 -20   1   12.04   14.10   1
  10  20   1   28.08   11.00   8
 -10  20  -1   21.90   10.66  11
  10  20   1    5.05   12.93   9
  10  20   1   10.22   12.80  12
  11  20   1   24.84   11.65   8
 -11 -20  -1   22.67    9.86  10
  11 -20   1   53.80   16.89   1
  11  20   1   21.36   11.81   9
 -11  20  -1   58.27   12.78  11
  12 -20   1   21.80   17.80   1
 -12  20  -1    8.13   10.57  11
 -12 -20  -1   18.31   10.88  10
  12  20   1   -1.71    4.75   9
  12  20   1    2.14    7.77   8
 -13 -20  -1   22.72   11.45  10
  12 -21  -1   21.34   16.88   1
  12  21  -1    2.86   63.03   9
 -12 -21   1    8.22   14.19  10
  11 -21  -1    1.85   83.25   1
  11  21  -1    1.97    5.32   8
  11  21  -1   -1.09   15.56   9
 -11  21   1    7.10   29.96  11
 -11 -21   1    5.34    8.42  10
  10  21  -1   11.79   10.22   9
  10 -21  -1   15.82   13.19   1
 -10  21   1   -2.25    9.48  11
   9 -21  -1   20.59   14.85   1
   9  21  -1    7.18   13.60   8
  -9 -21   1   17.74   12.68  10
   9  21  -1   11.96    9.10   9
   8 -21  -1   17.92   11.60   1
  -8 -21   1   19.13   10.42  10
  -8  21   1    7.73   11.12  11
   8  21  -1    2.11    8.34  12
  -7  21   1   -2.05    5.01  11
  -7 -21   1    2.81    8.89  10
   7 -21  -1   11.65   16.65   1
  -6  21   1   17.63   16.42  11
   6  21  -1    6.04   12.88   8
   6  21  -1    1.13   10.29  12
  -6  21   1    2.98    9.83  12
  -6 -21   1   22.81    9.54  10
   5  21  -1    2.81  183.50  12
  -5 -21   1   15.97    8.50  10
  -5  21   1    1.14   15.47  11
  -4 -21   1   38.82    8.82  10
   4  21  -1   19.76   12.78  12
  -4  21   1   16.86   11.38  12
   4  21  -1   16.52    8.95   8
  -4 -21   1   28.21   10.43   2
  -4  21   1   43.70   11.86  11
  -3  21   1   20.21    9.86   3
  -3 -21   1   29.22    9.44   2
   3  21  -1    9.88   13.74  12
  -3  21   1   12.63   10.53  12
  -3  21   1   11.70   15.47  11
   2  21  -1   58.14   12.40  12
  -2  21   1   60.45   10.61  12
  -2  21   1   75.50   10.76   3
  -2  21   1  100.46   13.22  11
   2 -21  -1   52.78   11.34   2
  -2 -21   1   66.64   11.18   2
   1 -21  -1   33.38   11.27   2
  -1  21   1   81.95   11.89  11
  -1  21   1   35.14   11.67  12
  -1 -21   1   43.70   11.18   2
   1  21  -1   14.86   11.69  12
   0  21  -1   29.05   10.57  11
   0  21   1   29.29   10.75  11
   0  21   1    5.35   10.43  12
   0  21  -1   15.99   12.06  12
   0 -21   1   19.65   11.15   2
   0 -21  -1    4.46   21.93   2
  -1  21  -1   51.52   11.65  12
   1  21   1   59.19   12.06  12
  -1 -21  -1   53.60   11.48   2
   1 -21   1   43.47   11.22   2
  -1  21  -1   76.05   11.18  11
   2 -21   1   11.40   11.39   2
  -2  21  -1   10.89   10.10  12
  -2 -21  -1   12.39   10.06   2
   2  21   1   10.37   10.31  12
  -2  21  -1   22.80   10.47  11
   3  21   1   22.65   11.07  12
  -3 -21  -1    9.77    8.52   2
  -3  21  -1    5.99   12.22  12
  -3  21  -1   33.28   11.17  11
  -4 -21  -1   70.71    8.61  10
  -4  21  -1   63.08   10.31  12
   4  21   1   62.16   11.54  12
  -4  21  -1   94.22   12.70  11
  -4 -21  -1   92.00   11.58   2
   4  21   1   57.49    9.54   8
  -5  21  -1    0.27    8.28  11
   5 -21   1   -1.98   36.10   1
  -5 -21  -1    7.09    8.30  10
   6 -21   1   65.79   14.30   1
  -6 -21  -1   70.20    9.72  10
  -6  21  -1   62.08   13.13  11
   6  21   1   67.85   12.39  12
   6  21   1   68.02    9.70   8
   7  21   1    9.29    9.46   8
   7 -21   1   26.45   13.41   1
   7  21   1   15.44   11.08  12
  -7 -21  -1    7.32    7.01  10
  -7  21  -1   13.60   19.85  11
  -8 -21  -1   18.28   10.12  10
   8 -21   1   14.98   16.27   1
   8  21   1    2.60    9.78  12
  -8  21  -1   -1.85    4.87  11
   8  21   1    8.77   10.20   8
   9 -21   1   43.56   16.14   1
  -9  21  -1   36.10   13.23  11
   9  21   1   38.49   10.90   8
   9  21   1   44.41   14.22  12
  -9 -21  -1   53.04   10.41  10
  10  21   1    0.36    2.31   9
 -10 -21  -1    8.73   11.70  10
  10  21   1    1.06  125.47   8
 -10  21  -1   35.36   13.97  11
  10 -21   1    8.73   15.16   1
 -11  21  -1   31.03   14.56  11
  11  21   1   21.72   12.10   8
 -11 -21  -1   16.09   12.12  10
  11  21   1   25.41   13.63   9
  11 -21   1   27.36   17.40   1
 -12 -21  -1   34.95   12.08  10
  12  21   1   18.19   13.96   9
  11 -22  -1   20.55   14.66   1
  11  22  -1    1.85   27.39   9
 -10 -22   1    8.14    7.52  10
  10 -22  -1    7.76   12.41   1
   8  22  -1    3.03    8.74  12
   8  22  -1    3.04   12.62   8
  -8  22   1   13.88   15.12  11
  -7  22   1   12.64   16.75  11
  -7 -22   1    0.52    4.83  10
   7  22  -1    1.41    9.88   8
  -6 -22   1   -0.56   18.00  10
  -6  22   1    3.46    9.29  11
   6  22  -1    6.23   14.03  12
   6  22  -1   -2.37    5.51   8
  -5  22   1    9.98   15.50  12
  -5 -22   1    8.38   15.58  10
  -4  22   1   -0.23   67.54  12
  -4  22   1   10.88    9.89  11
   3  22  -1    4.24   10.46  12
   3 -22  -1    4.03   11.60   2
  -3  22   1    8.74   10.74  12
  -3 -22   1   21.83   12.10   2
  -3  22   1   41.57   11.63  11
  -2 -22   1   20.72   12.84   2
  -2  22   1    9.83   10.70  12
   2  22  -1   10.53   17.65  12
  -2  22   1   25.00   11.13  11
  -1  22   1   -2.05   13.00  12
  -1  22   1   23.27   12.16  11
  -1 -22   1   16.86   12.76   2
   0  22  -1   61.14   12.44  12
   0  22   1   66.72   11.74  12
   0  22  -1   87.76   13.50  11
   0 -22  -1   67.10   12.24   2
   0 -22   1   86.75   11.66   2
   1  22   1   -1.61   16.49  12
  -1 -22  -1   13.37    8.15   2
  -1  22  -1   24.94   11.27  11
   1 -22   1    1.20    2.95   2
  -2  22  -1   62.87   11.57  12
  -2  22  -1   73.50   11.77  11
   2  22   1   72.62   13.15  12
  -2 -22  -1   65.94   12.24   2
   2 -22   1   60.30   12.84   2
  -3  22  -1   31.41   10.92  11
  -3 -22  -1   27.31   11.10   2
   3 -22   1   20.99   11.02   2
   3  22   1   15.60   10.97  12
  -4  22  -1    3.88   14.25  12
  -4 -22  -1   33.18    9.88   2
   4  22   1   -1.89   12.64  12
   5  22   1   26.50   12.49  12
  -5 -22  -1   38.32    9.69  10
  -5  22  -1   13.25   10.95  11
   6  22   1   18.31   11.00  12
   6  22   1   13.08    9.15   8
  -6  22  -1   34.24   14.83  11
  -6 -22  -1   14.24   10.04  10
  -7 -22  -1   13.36   10.19  10
   7  22   1    1.87   11.51   8
   7 -22   1   18.75   16.92   1
  -7  22  -1   10.61   12.36  11
   7  22   1    8.06   12.85  12
   8  22   1   65.92   11.44   8
  -8 -22  -1   84.56   11.08  10
  -8  22  -1   62.50   14.19  11
   8 -22   1   73.13   16.67   1
   8  22   1   69.16   12.36  12
   9 -22   1   23.02   17.40   1
  -9 -22  -1   11.83   11.60  10
   9  22   1    5.85    9.07  12
   9  22   1   14.59   11.96   8
  10  22   1   29.27   11.32   8
 -10  22  -1   27.66   24.07  11
  10 -22   1   37.95   17.23   1
 -10 -22  -1   23.15   11.92  10
  10  22   1   35.35   13.74  12
  11 -22   1   25.67   17.64   1
 -11 -22  -1   19.55   12.58  10
 -10 -23   1    1.28    9.82  10
  -9  23   1    6.32    9.97  11
  -8 -23   1   -0.71    3.92  10
  -7  23   1    6.41   28.00  11
  -7 -23   1    2.85   15.95  10
   7  23  -1   -2.55    6.29   8
  -6  23   1   -1.83   11.27  11
   5  23  -1   10.15   15.89  12
  -5  23   1    7.22   38.62  11
   4  23  -1    9.57   13.64  12
  -4  23   1   16.99    9.95  11
  -3  23   1    5.39   11.57  12
  -3  23   1   19.62   11.94  11
  -3 -23   1   21.75   11.98   2
  -2 -23   1   34.30   11.85   2
  -2  23   1   12.41   11.97  12
   2 -23  -1    8.06   10.90   2
  -2  23   1   37.94   11.29  11
   2  23  -1   27.28   12.96  12
   1 -23  -1   35.56   12.57   2
  -1 -23   1   45.17   12.53   2
   1  23  -1   29.14   11.31  12
  -1  23   1   57.49   12.52  11
  -1  23   1   34.81   12.80  12
   0 -23  -1   11.42   12.48   2
   0  23   1   11.52   12.21  12
  -1 -23  -1   20.42   10.63   2
   1  23   1   16.03   13.85  12
  -1  23  -1   21.39   11.26  12
  -1  23  -1   51.75   12.55  11
   1 -23   1   19.63   12.76   2
  -2 -23  -1   23.26   10.80   2
  -2  23  -1   18.62   13.20  11
   2  23   1   10.41   10.32  12
  -2  23  -1   13.57   12.64  12
  -3  23  -1   27.59   14.74  11
   3  23   1   10.19   11.92  12
  -3 -23  -1   13.96   11.76   2
  -3  23  -1    9.28   10.39  12
   3 -23   1   -0.85    4.28   2
   4  23   1   37.55   11.73  12
  -4  23  -1   71.76   13.89  11
  -4  23  -1   20.55   10.36  12
   5  23   1    5.43    8.78  12
  -5  23  -1   13.85   11.26  11
   6  23   1   35.73   13.51  12
  -6  23  -1   38.14   13.89  11
  -7 -23  -1    4.38   11.55  10
   7  23   1   16.93   12.08  12
  -7  23  -1   27.90   14.88  11
  -8 -23  -1    6.39    9.83  10
   8  23   1    1.98   15.93  12
  -9 -23  -1   23.88   10.72  10
   9  23   1   15.36   11.02   8
  -9  23  -1    3.85   11.25  11
   9  23   1   15.92   14.38  12
 -10 -23  -1    1.07    5.48  10
  10 -23   1   12.09   16.62   1
   8  24  -1   11.35   11.95   8
   8  24  -1    2.11   10.32  12
  -7  24   1    1.29    3.99  11
  -6  24   1   -0.33   58.30  11
  -5  24   1   12.81   14.26  11
  -5  24   1    1.97   32.00  12
  -4  24   1   11.51    8.62  11
   3 -24  -1   22.41   11.92   2
  -3 -24   1   33.24   13.92   2
  -3  24   1   12.85   11.57  12
   3  24  -1   47.50   12.39  12
  -3  24   1   70.30   14.09  11
  -2  24   1    3.76   17.05  12
  -2 -24   1    5.87   16.82   2
  -2  24   1   15.33   11.50  11
  -1  24   1   13.98   11.66  12
  -1 -24   1   20.03   12.31   2
   1  24  -1   16.04   12.10  12
   1 -24  -1   -2.84    8.21   2
   0 -24   1   12.93   12.87   2
   0 -24  -1    9.92   10.47   2
   0  24  -1    1.58    9.22  12
   0  24   1    2.00    6.83  12
  -1 -24  -1   15.67   12.45   2
  -1  24  -1   15.86    9.59  11
  -2  24  -1   24.07   11.64  12
   2  24   1   12.34   12.01  12
   2 -24   1   -1.47   11.65   2
  -2  24  -1   28.36   12.86  11
  -2 -24  -1   12.03   11.61   2
   3  24   1   38.68   13.61  12
   3 -24   1   23.33   12.88   2
  -3  24  -1   26.87   13.08  12
  -3 -24  -1   28.35   14.02   2
  -3  24  -1   43.75   14.37  11
  -4  24  -1    3.79    6.84  11
   4  24   1    5.66   10.58  12
   5  24   1   48.00   14.36  12
  -5  24  -1   60.35   14.20  11
  -6  24  -1   20.13   12.97  11
   6  24   1    8.43   18.33  12
  -7  24  -1   13.86   13.60  11
  -8 -24  -1    3.52    7.71  10
   8  24   1   19.09   11.64   8
   8  24   1   10.29   11.15  12
   5  25  -1   13.37   12.49  12
  -5  25   1   20.75   15.22  11
   4  25  -1    8.13   15.25  12
  -4  25   1   34.54   12.42  11
  -3  25   1   26.39   12.09  11
  -3 -25   1   15.02   12.74   2
   3 -25  -1    1.92    7.94   2
  -2  25   1   17.58   12.85  11
   2 -25  -1   -1.58    6.79   2
  -2 -25   1   13.77   14.23   2
   2  25  -1    1.90    8.68  12
   1 -25  -1   21.06   14.23   2
   1  25  -1   15.17   14.85  12
  -1 -25   1   27.82   13.65   2
  -1  25   1   15.57   14.03  12
   0 -25   1   -1.34    3.07   2
   1 -25   1   20.02   13.66   2
  -1 -25  -1    6.38   14.09   2
   1  25   1   27.63   13.83  12
  -2  25  -1   11.37   13.46  11
   2  25   1   16.71   14.90  12
  -2 -25  -1    3.90   12.02   2
  -3  25  -1   38.17   16.39  11
  -3 -25  -1   22.46   13.08   2
   3  25   1    6.26   12.58  12
  -3  25  -1    6.80   16.77  12
   4 -25   1    6.24   14.92   2
  -4  25  -1   20.60   14.07  11
   4  25   1   34.72   14.96  12
   5  25   1    9.07   10.88  12
  -5  25  -1    4.24    9.63  11
  -6  25  -1   19.37   11.59  11
  -3  26   1    1.36   31.09  12
  -3  26   1   19.34   13.09  11
  -2 -26   1   13.42   18.11   2
  -2  26   1    7.04   13.68  12
   2 -26  -1    0.95   15.69   2
   1 -26  -1    7.32    9.15   2
   0 -26  -1   20.33   13.67   2
   0 -26   1   44.71   15.70   2
   0  26   1    1.36    7.16  12
   0  26  -1   15.42   12.64  12
  -1 -26  -1    4.99   32.20   2
   1 -26   1    0.51    5.94   2
  -1  26  -1   11.57   10.12  12
  -2 -26  -1   13.66   16.00   2
  -2  26  -1   22.21   15.52  11
  -2  26  -1   12.78   13.53  12
   2 -26   1   13.35   17.94   2
   3 -26   1    7.56   14.12   2
  -3  26  -1   18.76   15.37  11
 -19   0   2    5.62   15.06  11
 -18   0   2   39.68   12.96  11
  18   0  -2   22.09   10.67   9
  17   0  -2   25.35    8.20   9
  16   0  -2  124.08   10.65   9
  15   0  -2   10.16    6.82   9
  14   0  -2  135.40    8.99   8
  14   0  -2  128.22    9.66   9
 -14   0   2  118.67    7.67  10
  13   0  -2    7.03    9.09   9
  13   0  -2   11.09    6.87   8
 -13   0   2   14.86    4.97  10
  12   0  -2    2.03    7.95   8
 -12   0   2   11.40    4.41  10
  11   0  -2   18.73    5.71   8
  11   0  -2    8.89    6.23   9
 -11   0   2   12.56    4.06  10
  10   0  -2   -2.59    2.54   8
 -10   0   2    5.08    4.53  10
  10   0  -2    5.64    4.52   9
   9   0  -2   -2.37    2.69   9
   8   0  -2  123.60    6.30   8
  -8   0   2  108.92   10.73   7
   8   0  -2  117.17    6.49   9
   7   0  -2    0.19    0.91   9
   6   0  -2   23.11    3.62   8
  -6   0   2   18.44   10.65   7
   6   0  -2   19.02    4.68   9
   5   0  -2   -2.05    0.56   9
   5   0  -2   -2.47    0.88   8
   4   0  -2    2.93    2.23   8
   4   0  -2    4.68    2.38   9
  -4   0   2    3.25    2.23   7
   3   0  -2   -3.25    1.12   8
  -3   0   2   -1.93    0.25   7
  -2   0  -2  125.95    4.27  10
  -3   0  -2   -1.98    1.81  10
   3   0   2   -1.08    2.00   8
   3   0   2    2.67    3.04   1
   4   0   2  232.71    8.80   8
  -4   0  -2  237.36    7.89  10
  -4   0  -2  232.02    7.25   6
   4   0   2  230.15   11.42   1
   5   0   2   -1.12    2.09   8
  -5   0  -2   -0.94    1.27   6
  -5   0  -2   -2.10    2.07  10
   5   0   2    5.26    2.72   1
   6   0   2   32.80    3.90   8
   6   0   2   33.08    5.88   1
  -6   0  -2   23.58    3.56  10
   7   0   2    0.15    0.58   8
   8   0   2  249.79   10.52   8
   8   0   2  239.58   10.15   9
  -8   0  -2  257.04    9.32  10
   9   0   2    7.15    3.84   8
  -9   0  -2   -1.44    3.07  10
  10   0   2  295.41   12.56   8
  10   0   2  284.19   12.41   9
 -10   0  -2  287.20   11.01  10
  11   0   2    3.58    6.08   9
  11   0   2    4.87    4.61   8
  12   0   2   27.07    6.88   9
 -12   0  -2   18.16    5.70  10
  12   0   2   17.10    6.86   8
  13   0   2    4.47    6.00   8
  13   0   2   12.52    6.18   9
 -13   0  -2    5.32    6.00  10
  14   0   2   30.77    7.86   8
  14   0   2   29.81    9.61   9
 -14   0  -2   25.87    5.91  10
  15   0   2    5.24    8.47   9
  16   0   2   79.48   11.55   9
  18   0   2   51.14   12.80   9
  19   0   2    8.04   18.90   9
  19   1  -2    6.12   22.74   9
  18   1  -2   26.64   10.57   9
 -18   1   2   15.18   11.92  11
  17  -1  -2   46.37    9.58   9
 -17   1   2   77.94   13.99  11
  17   1  -2   57.47   10.24   9
  16  -1  -2    3.06    3.05   9
  16   1  -2    3.97   21.84   9
  15  -1  -2   78.92    8.63   9
 -15  -1   2   61.10    7.37  10
  15   1  -2   86.64    9.02   8
  15   1  -2   85.31    9.24   9
 -14  -1   2   48.44    6.29  10
  14   1  -2   36.08    7.35   9
  14  -1  -2   43.13    7.85   9
  14   1  -2   48.94    7.43   8
 -13   1   2   46.28    5.50  10
  13  -1  -2   36.21    7.66   8
  13   1  -2   56.17    7.41   8
 -13  -1   2   52.22    6.36  10
  13  -1  -2   60.59    7.89   9
  13   1  -2   41.33    8.70   9
 -12   1   2   72.00    5.61  10
  12   1  -2   91.69    7.41   8
  12   1  -2   59.08    7.12   9
 -12  -1   2   90.98    6.18  10
  12  -1  -2   54.96    7.30   9
  12  -1  -2   73.15    7.07   8
 -11   1   2    4.13  126.04   7
 -11   1   2   15.15    4.64  10
  11   1  -2   10.21   12.81   8
  11   1  -2    7.79   10.01   9
  11  -1  -2    4.35    7.75   9
  11  -1  -2   10.15    6.35   8
 -11  -1   2   13.24    4.84  10
 -10   1   2   79.15   17.18   7
 -10   1   2   40.27    4.88  10
 -10  -1   2   44.84    5.22  10
  10  -1  -2   32.47    6.00   8
  10   1  -2   30.82    6.78   8
 -10  -1   2   67.26   16.70   7
  10  -1  -2   33.62    7.04   9
  10   1  -2   39.12    7.65   9
  -9  -1   2  149.96   13.62   7
   9   1  -2  154.84    8.45   9
  -9   1   2  172.12   13.73   7
   9   1  -2  156.95    8.44   8
   9  -1  -2  149.65    8.04   8
   9  -1  -2  167.64    8.13   9
  -9   1   2  174.88    6.82  10
   8   1  -2    7.75    5.81   8
  -8   1   2   10.40   10.69   7
   8   1  -2   18.06    6.24   9
   8  -1  -2   16.43    5.25   8
   8  -1  -2   16.02    5.06   9
  -8  -1   2   15.77   14.98   7
  -7  -1   2  597.08   28.38   7
   7   1  -2  607.82   20.12   9
   7   1  -2  624.40   21.69   8
   7  -1  -2  625.55   21.47   8
  -7   1   2  599.46   28.50   7
   7  -1  -2  607.26   19.98   9
   6  -1  -2   -0.11    0.11   8
  -6  -1   2   -0.98    1.00   7
   6   1  -2   -1.82    1.83   9
   6  -1  -2   -1.90    1.21   9
   6   1  -2    0.38    0.33  12
  -5   1   2  215.23   11.77   7
   5   1  -2  198.45    8.45  12
   5   1  -2  229.74    8.08   9
  -5  -1   2  218.41   11.62   7
   5  -1  -2  226.14    7.85   9
   5  -1  -2  232.22    8.29   8
   5   1  -2  237.21    8.60   8
   4   1  -2    3.54   30.39   9
   4   1  -2    4.36    2.32  12
   4  -1  -2    0.64    0.88   9
   4  -1  -2    2.03   10.89   8
  -4  -1   2    3.69    3.84   7
  -3   1   2  118.06    6.09   3
  -3   1   2  111.72    8.47   7
   3  -1  -2  126.66    4.69   8
   3   1  -2  117.10    5.03   9
   3   1  -2  126.41    5.27   8
   3  -1  -2  118.73    4.66   9
  -3  -1   2  107.12    8.31   7
   3   1  -2  121.43    5.02  12
   2  -1   2   54.83    2.84   8
  -2  -1  -2   51.33    2.45   6
   2   1   2   57.33    3.09   8
  -2  -1  -2   55.84    2.90  10
  -2   1  -2   53.15    2.27   6
  -3   1  -2  701.51   21.37  10
   3  -1   2  731.32   30.84   1
  -3   1  -2  692.91   19.66   6
   3   1   2  714.34   24.05   8
  -3  -1  -2  669.84   19.64   6
  -3  -1  -2  678.39   21.50  10
   3   1   2  687.59   30.57   1
   3  -1   2  686.78   23.85   8
   4   1   2   36.35    3.38   8
   4  -1   2   32.84    4.70   1
   4   1   2   34.86    4.26   1
  -4   1  -2   29.05    2.63   6
  -4   1  -2   26.92    2.94  10
  -4  -1  -2   28.81    2.76   6
  -4  -1  -2   29.23    2.98  10
   4  -1   2   34.39    3.17   8
   5   1   2   24.36    3.65   8
  -5   1  -2   29.97    2.98  10
  -5  -1  -2   28.55    2.82   6
   5  -1   2   27.71    3.35   8
  -5  -1  -2   26.10    3.10  10
   5  -1   2   29.97    5.17   1
   6   1   2  125.71    6.50   8
   6  -1   2  131.11    6.18   8
   6  -1   2  129.66    8.89   1
  -6   1  -2  130.26    5.50  10
  -6  -1  -2  130.16    5.23   6
  -6  -1  -2  138.42    5.66  10
  -7   1  -2  390.43   12.12  10
   7   1   2  353.57   12.86   9
   7  -1   2  363.58   13.55   8
  -7  -1  -2  365.43   12.24  10
   7  -1   2  341.16   18.08   1
   7   1   2  359.44   13.77   8
   8  -1   2  112.22   10.00   1
  -8  -1  -2  116.77    5.91  10
   8   1   2  118.06    7.18   9
   8   1   2  113.74    6.69   8
   8  -1   2  113.12    6.66   8
  -8   1  -2  108.21    5.71  10
   9   1   2  361.02   14.05   8
  -9   1  -2  361.04   12.32  10
   9  -1   2  352.48   13.75   8
  -9  -1  -2  350.93   12.51  10
   9   1   2  335.21   13.53   9
   9  -1   2  334.15   13.27   9
 -10   1  -2    5.17    7.32  10
  10   1   2   13.53    8.18   9
  10   1   2   17.54    7.77   8
  10  -1   2   20.06    5.84   8
  10  -1   2   29.32    6.80   9
 -10  -1  -2   23.55    5.70  10
 -11   1  -2   32.03    5.23  10
  11  -1   2   16.36    5.67   9
  11   1   2   20.95    7.12   9
  11   1   2   29.06    7.49   8
  11  -1   2   33.40    5.79   8
 -11  -1  -2   25.82    5.43  10
  12  -1   2   88.53    8.47   9
  12  -1   2  108.26    7.86   8
  12   1   2   97.85    8.74   9
 -12  -1  -2   87.32    6.79  10
 -12   1  -2   88.21    6.51  10
  12   1   2   96.58    8.15   8
 -13   1  -2   13.72    4.57  10
  13  -1   2    8.01    8.55   8
  13   1   2   11.62    8.07   8
  13   1   2    9.66    7.15   9
 -13  -1  -2    5.43    5.69  10
  13  -1   2    6.53    4.92   9
 -14  -1  -2   84.69    7.23  10
  14   1   2   95.54    9.74   8
  14  -1   2   97.87    9.45   9
  14   1   2  103.86    9.40   9
  15   1   2   37.54    8.84   8
 -15  -1  -2   40.29    6.86  10
  15   1   2   47.52    8.26   9
  15  -1   2   44.93   10.09   9
  16  -1   2    4.49    7.62   9
  16   1   2    8.67   20.25   9
  17  -1   2   37.82   11.18   9
  17   1   2   40.91   10.40   9
  18   1   2   13.71   10.14   9
  18  -1   2    7.07    9.46   9
  19   1   2   10.33   13.20   9
 -19   2   2   19.34   13.72  11
  19   2  -2   17.25   12.25   9
 -18   2   2   13.37   15.73  11
 -17   2   2   14.51   12.28  11
  17   2  -2    3.61  107.56   9
 -16   2   2    8.09   11.19  11
  16   2  -2   58.19    8.59   8
  16   2  -2   65.66    8.46   9
 -16  -2   2   46.33    7.90  10
  16  -2  -2   52.13    7.96   9
 -15  -2   2    5.20    8.53  10
  15  -2  -2   16.31    6.71   9
  15   2  -2    9.73    9.89   8
  15   2  -2    7.01    6.37   9
 -14  -2   2   33.90    6.23  10
  14  -2  -2   29.00    6.31   9
  14   2  -2   49.94    7.02   9
  14   2  -2   35.40    7.02   8
 -13  -2   2  145.25    8.17  10
  13   2  -2  160.69   10.05   9
  13   2  -2  148.58    9.84   8
  13  -2  -2  169.11    9.70   9
  12   2  -2   19.91    6.48   8
  12  -2  -2   28.68    7.81   9
  12  -2  -2   24.63    5.41   8
 -12   2   2   17.90    5.32  10
  12   2  -2   19.35    6.94   9
 -12  -2   2   16.28    5.39  10
 -11   2   2  218.81    8.99  10
  11   2  -2  233.01   11.23   8
 -11  -2   2  241.22    9.59  10
 -11   2   2  234.41   16.99   7
  11  -2  -2  230.04   10.53   9
  11   2  -2  227.63   11.16   9
  11  -2  -2  225.85   10.37   8
  10   2  -2    0.75    1.25   9
 -10   2   2    2.54    6.21  10
  10  -2  -2    0.68    3.08   8
  10   2  -2    1.81   14.59   8
 -10   2   2   11.50   16.65   7
  10  -2  -2   -0.37    0.57   9
   9   2  -2  147.16    8.35   9
   9  -2  -2  150.32    7.67   9
  -9  -2   2  125.19   12.56   7
   9  -2  -2  148.06    7.43   8
   9   2  -2  147.67    8.34   8
  -9   2   2  132.79   13.89   7
  -9   2   2  145.95    6.23  10
  -8  -2   2    5.43   32.12   7
  -8   2   2    5.60    2.60  10
  -8   2   2   10.78   61.97   7
   8  -2  -2    2.11   21.26   8
   8   2  -2    0.95    1.95   9
  -7   2   2   35.43    9.65   7
  -7  -2   2   40.81    8.44   7
   7  -2  -2   40.02    3.82   8
   7   2  -2   35.56    4.70   8
   7   2  -2   35.27    2.81  12
   7  -2  -2   41.63    4.23   9
   7   2  -2   40.45    4.95   9
  -6  -2   2  182.88   11.12   7
  -6   2   2  182.63   11.61   7
   6   2  -2  191.19    7.63   9
   6  -2  -2  190.92    7.19   9
   6   2  -2  192.99    8.01   8
   6  -2  -2  195.27    7.39   8
   6   2  -2  182.48    7.61  12
   5   2  -2  255.24    9.74  12
  -5   2   2  240.58   13.02   7
   5   2  -2  259.70    9.02   9
   5   2  -2  249.54    9.62   8
  -5  -2   2  230.89   12.61   7
   5  -2  -2  259.75    9.11   8
   5  -2  -2  256.47    8.62   9
   4   2  -2  193.01    7.52   8
   4   2  -2  193.68    7.05   9
  -4   2   2  165.94   10.56   7
   4   2  -2  193.32    7.59  12
  -4  -2   2  178.74    9.81   7
   4  -2  -2  194.18    6.92   8
   4  -2  -2  196.21    6.62   9
   4  -2  -2  198.99   10.01   1
   3  -2  -2   16.95    4.07   1
   3   2  -2    6.47    2.31  12
  -3   2   2   -0.21    2.33   3
  -3   2   2    4.38    6.84  11
   3  -2  -2    2.47    2.20   9
   3  -2  -2    4.74    1.69   8
   3   2  -2   -1.23    1.94   8
  -3  -2   2    1.01   10.84   7
   3   2  -2    7.05    1.90   9
  -3   2   2   -0.40    3.64   7
  -2   2   2  138.44    6.21  11
   2  -2  -2  152.12    4.87   9
  -2   2   2  147.40    6.12   3
  -2   2   2  144.62    8.05   7
   2   2  -2  159.18    6.14  12
   2  -2  -2  154.94    7.44   1
  -2  -2   2  147.93    7.46   7
  -2   2  -2   11.42    1.69   6
   2   2   2    9.50    3.16   8
  -2  -2  -2   12.40    1.82   5
  -2  -2  -2   14.03    2.34   6
   2  -2   2   11.57    2.74   4
  -2   2  -2    9.65    1.21  10
  -2  -2  -2   12.01    2.62  10
   3  -2   2 2021.69   65.91   8
  -3  -2  -2 1867.62   54.17   6
  -3   2  -2 1966.53   54.19   6
  -3   2  -2 1961.94   59.06  10
  -3  -2  -2 1877.20   59.23  10
   3   2   2 2005.61   66.15   8
   4  -2   2  186.61    6.96   8
   4  -2   2  180.32    9.80   1
  -4  -2  -2  177.61    5.89   6
  -4  -2  -2  184.18    6.59  10
  -4   2  -2  184.93    6.13  10
   4   2   2  177.53    7.41   8
   5  -2   2  363.16   16.97   1
   5  -2   2  346.90   12.66   8
  -5   2  -2  357.44   11.30  10
   5   2   2  356.86   13.08   8
  -5  -2  -2  341.21   11.62  10
  -5  -2  -2  351.43   10.60   6
  -6  -2  -2   68.09    3.85   6
  -6   2  -2   69.06    4.00  10
   6  -2   2   61.88    4.36   8
   6  -2   2   67.44    6.97   1
   6   2   2   61.41    4.95   9
  -6  -2  -2   66.81    4.37  10
   6   2   2   66.59    5.27   8
   7  -2   2  199.69    8.35   8
   7   2   2  180.88    8.42   9
   7  -2   2  206.84   12.03   1
   7   2   2  202.23    8.85   8
  -7  -2  -2  201.52    7.86  10
  -7   2  -2  207.47    7.44  10
   8  -2   2   29.24    4.98   8
  -8  -2  -2   33.20    4.50  10
   8   2   2   33.50    5.92   9
  -8   2  -2   22.22    4.36  10
   8   2   2   31.12    5.07   8
   8  -2   2   38.72    7.75   1
   9   2   2   22.30    7.72   9
   9   2   2   25.57    6.85   8
  -9  -2  -2   34.85    5.39  10
  -9   2  -2   21.24    5.07  10
   9  -2   2   28.43    5.61   9
   9  -2   2   36.50    5.19   8
   9  -2   2   36.93   10.00   1
  10   2   2   16.72    6.36   8
  10   2   2    7.01   12.81   9
  10  -2   2   13.08    4.65   8
 -10  -2  -2   12.30    5.24  10
  10  -2   2   12.29    5.08   9
  11  -2   2  229.71   10.82   9
  11  -2   2  240.59   10.71   8
  11   2   2  230.49   11.48   8
  11   2   2  214.50   11.14   9
 -11   2  -2  236.52    9.17  10
 -11  -2  -2  242.62    9.74  10
 -12  -2  -2   10.05    4.62  10
  12   2   2    5.66   11.36   8
 -12   2  -2   11.28    4.23  10
  12   2   2    1.17    4.87   9
  12  -2   2    7.52    5.07   8
  12  -2   2    8.38    7.14   9
 -13  -2  -2  196.61    9.62  10
  13   2   2  213.24   11.57   9
  13   2   2  211.69   11.75   8
  13  -2   2  218.58   11.33   9
  14   2   2   13.63    6.85   8
  14   2   2    5.68    4.16   9
 -14  -2  -2    8.35    5.31  10
  14  -2   2   22.75    6.67   9
  15   2   2   45.49    9.87   8
 -15  -2  -2   55.75    7.61  10
  15  -2   2   53.56   10.56   9
  15   2   2   49.20    9.83   9
  16  -2   2   20.30    7.77   9
  17  -2   2   12.41    9.09   9
  17   2   2    8.59   10.90   9
  18   2   2   23.16    9.51   9
  19   2   2   11.70   12.46   9
 -18   3   2   21.74   12.96  11
  18   3  -2   30.60   10.76   9
  17   3  -2   32.24    9.65   9
 -17   3   2   26.00   12.68  11
 -16  -3   2    0.27   55.53  10
  16   3  -2    7.01    7.25   8
 -16   3   2   15.06   11.40  11
  15   3  -2   48.87    8.16   9
  15   3  -2   33.83    6.61   8
 -15   3   2   26.80   10.62  11
  15  -3  -2   43.47    7.57   9
 -15  -3   2   34.39    7.54  10
 -14  -3   2   24.24    6.94  10
 -14   3   2   25.88    9.58  11
  14   3  -2   24.17    7.47   8
  14   3  -2   45.97    7.96   9
  14  -3  -2   20.94    8.42   9
 -13   3   2    4.63    9.44  11
  13   3  -2   12.08    6.67   9
 -13  -3   2   13.39    5.43  10
  13   3  -2   11.52   11.17   8
  12  -3  -2  112.75    8.12   9
 -12  -3   2  112.18    7.18  10
  12   3  -2  104.56    8.76   8
  12   3  -2  119.82    8.38   9
  11   3  -2   20.01    8.05   8
 -11   3   2   23.52    4.62  10
  11  -3  -2   30.29    4.86   8
  11   3  -2   25.60    6.95   9
 -11   3   2   27.50   24.14   7
 -11  -3   2   38.60    5.65  10
  11  -3  -2   16.79    7.18   9
  10   3  -2  129.84    9.08   8
 -10   3   2  127.90    6.52  10
  10  -3  -2  137.20    8.14   9
 -10   3   2  185.77   15.65   7
  10  -3  -2  130.10    7.22   8
  10   3  -2  146.50    9.25   9
   9  -3  -2   74.30    6.16   9
   9   3  -2   62.50    7.06   9
   9   3  -2   65.38    7.06   8
   9   3  -2   62.44    4.61  12
  -9   3   2   66.47    4.54  10
  -9   3   2   83.48   12.91   7
   9  -3  -2   61.32    5.26   8
   8   3  -2   22.45    5.09   8
  -8   3   2   13.89   19.03   7
  -8   3   2   21.17    3.49  10
   8   3  -2   21.07    3.29  12
   8  -3  -2   22.62    4.12   8
   8  -3  -2   22.70    5.45   9
   8   3  -2   24.99    5.93   9
  -8  -3   2   15.28   20.03   7
  -7   3   2  141.05   11.25   7
  -7  -3   2  140.02   10.48   7
   7   3  -2  142.71    6.57  12
   7   3  -2  147.19    7.39   8
   7  -3  -2  151.27    6.45   9
   7   3  -2  147.61    7.27   9
  -7   3   2  154.55    5.53  10
   7  -3  -2  151.26    6.27   8
   6  -3  -2   39.37    6.17   1
  -6   3   2   33.25    9.38   7
   6  -3  -2   34.62    3.28   8
   6   3  -2   34.71    5.06   8
   6   3  -2   33.90    3.24  12
  -6  -3   2   33.29    8.36   7
   6  -3  -2   35.52    3.72   9
  -6   3   2   39.30    6.49  11
   6   3  -2   26.94    4.77   9
   5  -3  -2   55.57    5.47   1
   5  -3  -2   45.64    2.68   8
  -5   3   2   49.56    6.35   7
   5  -3  -2   50.55    3.10   9
   5   3  -2   44.23    3.21  12
  -5   3   2   44.76    5.50  11
   5   3  -2   38.79    4.14   8
  -5  -3   2   45.43    6.50   7
   5   3  -2   49.93    3.88   9
   4   3  -2   25.60    2.99  12
   4  -3  -2   44.29    4.76   1
  -4   3   2   30.32    5.10  11
   4   3  -2   24.62    3.10   9
  -4  -3   2   20.72    5.88   7
  -4   3   2   23.32    5.65   3
  -4   3   2   28.54    1.99  12
   4  -3  -2   28.93    2.36   9
  -4   3   2   19.23   10.76   7
   4   3  -2   23.77    3.67   8
   4  -3  -2   26.29    1.91   8
   3  -3  -2  396.78   17.84   1
   3   3  -2  401.45   14.92  12
   3  -3  -2  385.32   12.33   9
   3   3  -2  408.82   13.92   8
  -3   3   2  380.75   14.36   3
  -3  -3   2  371.75   17.59   7
  -3   3   2  376.36   18.37   7
  -3   3   2  389.90   14.64  11
   3   3  -2  393.42   12.78   9
   2  -3  -2   19.14    4.32   1
   2   3  -2   21.04    3.43  12
   2   3  -2   18.86    2.96   9
  -2   3   2   23.24    5.41   7
  -2   3   2   19.27    7.69  11
  -2   3   2   23.54    3.62   3
   2   3  -2   14.63    3.56   8
   1   3  -2   14.12    1.71   9
   1   3  -2   18.99    1.60   8
   1   3  -2   19.80    2.87  12
   1  -3  -2   17.51    2.87   1
  -1   3   2    5.08    8.51   7
  -1  -3   2   20.66    2.39   2
  -1   3   2   18.71    2.96   3
   1   3   2   37.38    3.90   3
   1   3   2   35.78    2.91   8
  -1   3  -2   32.43    3.20  12
  -1  -3  -2   36.89    2.22   6
   1  -3   2   36.58    4.40   4
  -1   3  -2   35.69    3.45  11
  -1  -3  -2   34.24    2.18   5
  -1  -3  -2   34.26    2.68  10
  -2  -3  -2  413.80   12.07   6
   2  -3   2  410.10   16.73   4
   2   3   2  436.10   14.98   8
  -2   3  -2  433.02   13.09  10
  -2   3  -2  414.55   15.74  11
  -2  -3  -2  429.28   13.39  10
   2   3   2  413.99   15.91   3
  -2  -3  -2  412.98   11.85   5
  -3   3  -2  316.23    9.90  10
  -3  -3  -2  307.44   10.30  10
   3   3   2  311.59   11.52   8
   3  -3   2  335.94   11.07   8
  -3  -3  -2  298.31    9.24   6
  -4  -3  -2  115.19    4.96  10
   4  -3   2  121.36    4.74   8
   4   3   2  112.40    5.70   8
   4  -3   2  114.01    7.69   1
  -4   3  -2  119.06    4.32  10
  -4  -3  -2  114.58    4.28   6
   5  -3   2   40.33    6.40   1
   5  -3   2   47.19    3.39   8
  -5  -3  -2   50.57    3.23   6
   5   3   2   46.21    4.09   9
   5   3   2   46.59    4.36   8
  -5  -3  -2   49.87    3.78  10
  -5   3  -2   46.91    2.79  10
   6   3   2   14.44    5.66   9
   6  -3   2   12.20    3.75   8
  -6   3  -2   14.89    2.56  10
  -6  -3  -2   14.04    4.05  10
  -6  -3  -2    8.62    3.56   6
   6   3   2    9.55    4.14   8
   6  -3   2   10.58    6.64   1
   7   3   2   41.85    5.26   8
  -7   3  -2   54.16    3.31  10
  -7  -3  -2   36.97    4.84  10
   7  -3   2   46.17    4.31   8
   7  -3   2   63.31    7.32   1
   7   3   2   46.77    5.36   9
  -7  -3  -2   41.87    3.86   6
   8   3   2    7.77    5.82   9
   8  -3   2   11.22    7.93   1
   8  -3   2    2.77    4.27   8
   8   3   2    5.34    5.80   8
  -8   3  -2    1.19    1.80  10
  -8  -3  -2    7.28    4.06  10
   9   3   2  330.21   13.44   9
  -9  -3  -2  331.50   12.35  10
   9  -3   2  339.36   19.30   1
   9   3   2  336.88   13.99   8
  -9   3  -2  354.10   11.58  10
   9  -3   2  339.28   13.18   8
  10  -3   2   75.46    6.29   8
  10  -3   2   68.96    6.83   9
 -10   3  -2   81.79    5.18  10
  10   3   2   74.80    7.90   8
 -10  -3  -2   60.84    6.71  10
  10  -3   2   97.78   11.90   1
  10   3   2   67.64    8.49   9
 -11  -3  -2  118.96    7.28  10
  11  -3   2  110.25    7.33   8
  11   3   2  114.62    8.42   8
  11   3   2  111.25    8.52   9
 -11   3  -2  106.69    6.01  10
  11  -3   2   98.14    8.12   9
  12   3   2  152.81    9.90   8
  12   3   2  159.50    9.85   9
 -12  -3  -2  128.81    8.25  10
  12  -3   2  148.76    8.96   9
  13  -3   2    8.03    6.42   9
  13   3   2   12.15    7.98   9
  13   3   2   14.01    8.50   8
 -13  -3  -2    7.77    6.17  10
  14   3   2   93.53   10.13   9
  14   3   2  133.78    9.87   8
  14  -3   2  109.07    9.35   9
 -14  -3  -2  100.51    8.20  10
  15   3   2   21.90    8.39   9
  15  -3   2   41.67    8.64   9
 -15  -3  -2   22.38    6.88  10
  15   3   2   19.66    7.63   8
 -16   3  -2   36.96   12.38  11
  16  -3   2   23.65    8.85   9
  16   3   2   13.46    9.44   8
  16   3   2   12.83   10.95   9
 -16  -3  -2   22.20    8.34  10
 -17   3  -2   25.55   14.70  11
  17   3   2   25.79    8.77   9
  18   3   2    4.75    8.12   9
 -18   3  -2   18.13   14.13  11
  19   3   2   30.41   11.05   9
 -19   4   2    7.49   15.29  11
  19   4  -2    4.82   10.83   9
  18   4  -2   33.90   10.16   9
 -18   4   2   20.11   11.77  11
  17   4  -2   17.73    8.84   9
 -17  -4   2   -0.29    4.22  10
  17   4  -2   17.90    8.60   8
 -17   4   2   19.77   11.15  11
  16   4  -2   73.47   10.75   9
  16   4  -2   60.35    9.47   8
 -16   4   2   92.60   13.31  11
 -16  -4   2   67.53    8.54  10
  15   4  -2    7.17    9.19   9
 -15   4   2    0.59    4.39  11
 -15  -4   2    9.93    7.19  10
  15   4  -2    7.86    7.91   8
  14   4  -2   32.98    9.04   8
 -14  -4   2   39.28    6.72  10
  14  -4  -2   36.62    7.81   9
 -14   4   2   43.71   10.63  11
  14   4  -2   41.49    8.18   9
  13   4  -2   12.35    7.79   8
 -13   4   2    6.13   11.93  11
 -13  -4   2   34.50    6.24  10
  13   4  -2   27.74    7.22   9
  13  -4  -2   15.86    9.00   9
  12   4  -2    4.21    6.88   9
 -12  -4   2   10.14    6.63  10
  12   4  -2    5.47   37.04   8
  12  -4  -2    2.62   28.47   9
 -12   4   2   21.19    9.56  11
  11   4  -2    7.54   33.21   8
 -11   4   2   10.92    6.95  11
  11   4  -2   21.28   10.28   9
  11  -4  -2   27.14    6.73   9
 -11  -4   2   55.05    6.43  10
 -10   4   2   12.82    4.56  10
 -10   4   2    7.07   24.79   7
  10   4  -2   21.73    8.57   9
 -10   4   2   19.68   11.69  11
  10  -4  -2   23.30    4.63   8
  10  -4  -2   14.68    5.66   9
  10   4  -2    9.36   28.96   8
   9   4  -2  112.33    8.41   8
   9  -4  -2  124.65    6.30   8
  -9   4   2  132.14    5.85  10
  -9   4   2  143.25   13.76   7
   9  -4  -2  136.25    6.88   9
   9   4  -2  122.78    8.53   9
  -9   4   2  135.28   10.06  11
   9   4  -2  118.81    6.66  12
  -8   4   2   97.01   11.56   7
   8   4  -2  108.52    5.86  12
   8   4  -2   96.10    6.81   9
   8  -4  -2  109.63    5.75   9
  -8   4   2  112.63    8.88  11
   8  -4  -2  105.18    5.25   8
   8  -4  -2   97.54   10.08   1
   8   4  -2   95.70    7.11   8
  -8   4   2  101.55    4.69  10
   7  -4  -2  268.12   14.43   1
  -7   4   2  260.68   11.78  11
   7  -4  -2  260.33    9.49   8
  -7   4   2  250.97   14.56   7
  -7   4   2  258.49    8.54  10
  -7  -4   2  270.88   14.01   7
   7   4  -2  246.94   10.53  12
   7  -4  -2  260.46    9.26   9
   7   4  -2  260.33   10.69   8
   7   4  -2  261.25   10.07   9
   6   4  -2    3.07   12.16   9
  -6   4   2    7.28   53.12   7
  -6   4   2    4.08    4.12  10
   6   4  -2    3.40   10.19  12
   6  -4  -2    4.69    2.97   8
   6  -4  -2    4.67    2.62   9
   6  -4  -2   15.65    4.67   1
  -6   4   2   10.55    6.12  11
   5   4  -2  195.09    8.03  12
  -5   4   2  185.20   11.06   7
  -5   4   2  186.15    6.09  10
   5  -4  -2  182.25   10.54   1
  -5   4   2  187.81    8.83  11
  -5  -4   2  187.99   10.34   7
   5   4  -2  196.82    7.47   9
   5   4  -2  200.84    8.07   8
   5  -4  -2  193.37    6.71   9
  -5   4   2  188.95    7.60  12
   5  -4  -2  189.19    6.81   8
  -4   4   2   63.87    5.21  11
   4   4  -2   64.08    3.94  12
   4  -4  -2   63.68    5.69   1
   4  -4  -2   58.55    2.92   9
   4   4  -2   64.43    4.27   8
  -4   4   2   61.96    3.31  12
  -4   4   2   57.06    7.32   7
  -4  -4   2   56.47    5.72   7
  -4   4   2   60.79    5.33   3
   4   4  -2   68.16    3.95   9
   3   4  -2  220.24    7.68   9
  -3   4   2  211.23   11.52   7
   3  -4  -2  209.83    6.95   9
  -3  -4   2  204.47   10.26   7
  -3   4   2  219.72    8.99  11
   3  -4  -2  227.40   10.83   1
  -3   4   2  213.85    8.85   3
   3   4  -2  222.21    8.92  12
   3   4  -2  217.92    8.39   8
   3   4  -2  222.59    8.28   3
  -2   4   2  127.79    6.73  11
  -2   4   2  126.43    6.86   3
   2   4  -2  137.85    6.24  12
  -2  -4   2  134.09    5.65   2
   2   4  -2  142.27    5.32   9
   2   4  -2  139.19    5.80   8
   2  -4  -2  136.50    7.58   1
  -2   4   2  125.87    8.26   7
  -1   4   2  381.57   13.46   8
  -1   4   2  396.29   14.68  11
   1   4  -2  392.60   13.87   3
  -1   4   2  399.08   18.10   7
   1   4  -2  417.13   15.23  12
   1   4  -2  379.30   14.33  11
   1  -4  -2  351.54   12.06  10
   1   4  -2  402.00   13.74   8
  -1  -4   2  388.12   12.88   2
   1   4  -2  402.66   12.67   9
  -1   4   2  396.02   14.54   3
   0   4   2   62.48    3.10   9
   0   4  -2   77.15    3.28   9
   0   4  -2   77.97    4.45  11
   0   4   2   80.81    5.74   7
   0  -4  -2   77.18    2.87   5
   0  -4  -2   83.52    3.52  10
   0   4   2   70.36    5.95   3
   0   4  -2   75.67    4.76  12
   0   4   2   85.15    3.81   8
   0   4  -2   77.22    3.55   8
   0  -4  -2   73.99    3.22   6
   0   4  -2   73.93    4.09   3
   0   4   2   74.39    5.44  11
  -1  -4  -2 1769.80   57.02   2
   1  -4   2 1859.24   73.04   4
  -1   4  -2 1889.48   67.37  12
  -1  -4  -2 1797.55   50.49   6
   1   4   2 1780.57   63.06   3
  -1  -4  -2 1787.03   55.24  10
  -1   4  -2 1874.10   56.63   9
   1   4   2 1850.86   61.07   9
  -1   4  -2 1755.15   63.90  11
  -1  -4  -2 1794.94   52.46   5
   1   4   2 1864.91   61.66   8
  -2  -4  -2  137.70    5.26  10
   2   4   2  128.54    6.78   3
  -2   4  -2  134.17    4.50  10
  -2  -4  -2  133.91    4.25   5
   2   4   2  140.20    5.89   8
   2   4   2  138.19    5.41   9
  -2   4  -2  130.45    6.53  11
  -2   4  -2  139.86    6.20  12
  -2  -4  -2  139.85    4.48   6
   2  -4   2  129.95    6.65   4
  -2  -4  -2  136.11    5.94   2
   3   4   2  365.40   13.13   8
  -3   4  -2  348.72   13.87  11
  -3  -4  -2  357.63   11.71  10
   3   4   2  374.03   12.09   9
  -3   4  -2  371.55   11.29  10
  -3  -4  -2  353.70   10.47   6
   3   4   2  349.99   13.98   3
   4   4   2    1.49   10.76   8
  -4  -4  -2   -0.99    1.66   6
   4   4   2    0.71    2.01   9
   4  -4   2    3.65    1.44   8
  -4  -4  -2    2.30   36.84  10
  -4   4  -2    1.72    1.70  10
   5  -4   2    1.40    3.25   8
   5   4   2   -0.59    1.20   8
  -5  -4  -2    0.16    2.46   6
   5   4   2   -2.00    2.13   9
   6  -4   2   56.43    3.60   8
   6   4   2   43.86    5.34   8
  -6   4  -2   49.53    3.18  10
   6   4   2   38.94    5.33   9
  -6  -4  -2   45.27    4.28  10
   6  -4   2   38.37    8.38   1
  -6  -4  -2   49.18    3.77   6
   7  -4   2   97.76    9.16   1
  -7  -4  -2  104.41    4.80   6
   7   4   2  106.94    6.37   9
   7  -4   2   94.21    5.15   8
  -7  -4  -2   89.94    5.72  10
  -7   4  -2   88.44    4.30  10
   7   4   2   91.58    6.46   8
   8   4   2  362.58   13.81   9
  -8  -4  -2  374.43   12.85  10
   8  -4   2  339.15   19.36   1
   8   4   2  348.69   14.36   8
   8  -4   2  379.06   13.51   8
  -8   4  -2  356.45   11.92  10
   9  -4   2  169.43   12.71   1
   9  -4   2  147.99    7.33   8
   9   4   2  136.83    8.75   9
  -9   4  -2  143.58    6.40  10
   9   4   2  156.09    8.94   8
  -9  -4  -2  151.76    7.79  10
  10   4   2  216.95   11.05   9
  10  -4   2  217.14   10.16   9
  10   4   2  222.60   11.19   8
 -10   4  -2  224.53    8.46  10
  10  -4   2  202.89   15.89   1
  10  -4   2  236.64    9.78   8
 -10  -4  -2  210.55    9.79  10
  11   4   2   39.87    7.39   8
  11   4   2   32.03    8.10   9
 -11  -4  -2   45.87    6.19  10
  11  -4   2   30.58    6.74   9
 -12  -4  -2   46.47    6.52  10
  12   4   2   37.21    8.50   8
  12   4   2   25.29    7.77   9
  12  -4   2   35.99    7.01   9
  13   4   2   21.56    6.11   8
 -13  -4  -2   28.27    6.57  10
  13  -4   2   23.67    6.75   9
  13   4   2   16.70    6.98   9
 -14  -4  -2   31.67    7.25  10
 -14   4  -2   24.16   10.98  11
  14   4   2   47.84    9.55   8
  14   4   2   34.58   10.57   9
  14  -4   2   40.55    8.25   9
  15   4   2   -1.82    3.59   8
  15   4   2    2.62   27.31   9
 -15  -4  -2   10.50    7.53  10
 -15   4  -2    4.28    7.13  11
  15  -4   2   10.16    6.14   9
  16   4   2  119.31   12.83   9
 -16  -4  -2  133.89    9.57  10
 -16   4  -2  143.55   15.43  11
  16   4   2  138.48   12.48   8
  17   4   2   -2.48    6.11   8
 -17  -4  -2    3.96    5.66  10
 -17   4  -2   14.88   15.13  11
  17   4   2   10.48    9.83   9
  18   4   2   82.48   12.98   9
 -18   4  -2   74.36   15.90  11
  18   5  -2   13.16   12.29   9
  17   5  -2    5.22    7.14   8
  17   5  -2    8.10   10.61   9
 -17  -5   2    3.83    9.76  10
 -17   5   2    2.06    6.23  11
 -16   5   2   15.95   11.50  11
  16   5  -2   -2.23   10.72   9
 -16  -5   2   -1.77    4.24  10
 -15   5   2   48.85   11.44  11
  15   5  -2   59.52   10.08   9
 -15  -5   2   41.21    7.43  10
  15   5  -2   49.76    9.01   8
  14   5  -2  114.66    9.78   8
  14   5  -2  141.13    9.99   9
 -14  -5   2  115.91    8.34  10
 -14   5   2  120.91   12.12  11
  13   5  -2  118.53    9.24   9
  13  -5  -2  111.14    8.59   9
  13   5  -2  121.46   10.07   8
 -13  -5   2  106.25    8.11  10
 -13   5   2  111.16   11.28  11
  12   5  -2  129.47    8.94   9
 -12  -5   2  123.87    7.88  10
 -12   5   2  110.48   11.25  11
  12  -5  -2  131.07    8.19   9
  12   5  -2  118.43    9.51   8
 -12   5   2  163.02   15.65   7
 -11   5   2   21.31    9.11  11
 -11  -5   2    7.73    7.79  10
  11   5  -2   20.56    6.65   9
 -11   5   2   12.12  329.64   7
  11  -5  -2   23.39    6.07   9
  11   5  -2   13.92    9.53   8
  10   5  -2    1.08    2.93   8
 -10   5   2   46.41   23.49   7
 -10   5   2    6.30    5.45  11
  10   5  -2    8.22    9.98   9
  10  -5  -2    6.96    4.49   9
   9   5  -2   -2.13    4.53   9
   9  -5  -2    0.86   15.14   9
  -9   5   2    8.37    8.88  11
  -9   5   2   32.14   16.39   7
   8  -5  -2  177.49    7.30   9
   8   5  -2  172.57    8.63   9
   8   5  -2  164.64    8.91   8
   8  -5  -2  185.17   12.48   1
  -8   5   2  162.50    6.33  10
   8   5  -2  168.37    8.16  12
  -8   5   2  172.68   12.94   7
  -8   5   2  164.76   10.13  11
   8  -5  -2  169.02    6.94   8
  -7   5   2   67.41   10.78   7
  -7   5   2   49.00    6.72  11
   7   5  -2   53.51    5.94   8
   7   5  -2   53.51    5.51   9
   7  -5  -2   47.46    3.19   8
  -7   5   2   43.66    3.04  10
   7  -5  -2   64.95    7.56   1
   7   5  -2   57.73    4.82  12
   7  -5  -2   58.80    4.12   9
  -6   5   2  142.29    8.21  11
   6   5  -2  155.12    6.90   9
   6   5  -2  152.70    7.38   8
  -6   5   2  142.61    6.33  12
   6  -5  -2  161.53    9.80   1
   6   5  -2  163.50    7.01  12
  -6   5   2  140.30    4.94  10
  -6   5   2  144.92   10.39   7
   6  -5  -2  151.17    5.77   9
   6  -5  -2  142.12    5.49   8
  -5   5   2  235.85   10.39   3
  -5   5   2  224.12   13.00   7
   5   5  -2  246.45    8.86   9
   5  -5  -2  231.05    8.03   9
   5   5  -2  245.64   10.01  12
   5   5  -2  242.09    9.67   8
   5  -5  -2  241.53   12.59   1
  -5   5   2  242.24    9.55  12
  -5   5   2  235.25   10.54  11
  -4   5   2   13.94   16.90   7
   4   5  -2   15.92    3.75  12
   4   5  -2   21.58    4.34   8
   4   5  -2   17.99    4.54   3
   4   5  -2   20.01    3.14   9
   4  -5  -2   20.55    1.82   9
  -4   5   2   19.74    4.16  11
  -4   5   2   21.30    2.68  12
  -4   5   2   18.16    5.31   3
   4  -5  -2   23.71    4.84   1
  -3   5   2  335.17   16.51   7
  -3   5   2  335.55   13.06   3
   3   5  -2  348.18   12.34   3
   3   5  -2  353.00   12.57   8
   3   5  -2  338.55   13.51  12
  -3   5   2  340.08   13.35  11
   3   5  -2  342.33   11.49   9
   3  -5  -2  358.97   16.14   1
  -2   5   2  132.87    4.90   8
  -2   5   2  146.59    6.79  11
   2   5  -2  143.43    5.40   9
  -2   5   2  131.02    6.99   3
   2   5  -2  144.83    5.63   3
   2   5  -2  140.85    5.91   8
  -2   5   2  135.54    8.28   7
   2   5  -2  136.95    6.48  12
   2  -5  -2  145.70    7.71   1
  -2  -5   2  138.65    5.77   2
   1   5  -2   23.43    3.98   3
   1  -5  -2   23.91    2.30  10
   1   5  -2   28.68    3.64  12
   1   5  -2   27.09    3.28  11
  -1   5   2   27.22    4.78  11
   1   5  -2   27.14    2.56   8
  -1   5   2   27.70    2.19   8
  -1  -5   2   23.17    3.62   2
  -1   5   2   20.17    1.40   9
  -1   5   2   24.91    4.99   7
   1   5  -2   30.82    2.46   9
  -1   5   2   24.00    3.93   3
   0   5  -2  788.74   29.05  12
   0  -5  -2  756.61   23.64  10
   0  -5  -2  763.20   21.62   6
   0   5  -2  750.84   26.95   3
   0   5   2  776.81   24.15   9
   0   5  -2  788.09   24.24   9
   0   5   2  829.41   26.40   8
   0   5  -2  749.17   27.45  11
   0   5   2  768.32   33.94   7
   0   5   2  746.81   27.67  11
   0  -5  -2  737.94   21.28   5
   0   5   2  756.93   27.22   3
   0   5  -2  807.89   26.36   8
  -1  -5  -2   18.41    4.38   2
   1   5   2   23.13    3.61  11
  -1   5  -2   16.74    5.43   3
  -1  -5  -2   24.24    2.12   6
  -1  -5  -2   22.28    2.58  10
   1   5   2   24.15    2.95   8
   1   5   2   25.22    4.56   3
  -1   5  -2   22.27    5.16  11
  -1   5  -2   22.26    2.15   9
  -1  -5  -2   24.04    1.94   5
   1   5   2   25.80    2.61   9
  -1   5  -2   19.81    3.70  12
   1  -5   2   25.00    3.21   4
   2   5   2  215.51    8.01   8
  -2  -5  -2  204.20    7.80   2
   2   5   2  206.13    7.30   9
  -2   5  -2  205.89    8.58  12
   2   5   2  195.74    8.44   3
  -2   5  -2  194.30    8.59  11
  -2  -5  -2  201.60    5.97   5
  -2  -5  -2  205.80    6.22   6
  -2  -5  -2  205.94    7.12  10
   2  -5   2  199.34    8.64   4
  -3   5  -2   64.77    5.34  11
   3   5   2   66.88    4.01   9
  -3   5  -2   60.50    2.49  10
  -3  -5  -2   64.07    2.94   6
   3  -5   2   63.08    4.38   4
   3   5   2   57.44    5.24   3
  -3  -5  -2   60.09    3.81  10
   3   5   2   66.49    4.43   8
   4  -5   2    6.06    2.14   8
  -4  -5  -2    7.17    1.92   6
   4   5   2   10.90    3.16   8
   4   5   2    1.33   11.19   3
   4   5   2    2.77   13.02   9
  -4   5  -2    7.03    4.45  11
  -4  -5  -2    7.87    5.49  10
  -4   5  -2    6.03    1.98  10
  -5   5  -2  239.24   11.51  11
  -5   5  -2  274.34    8.58  10
   5   5   2  266.59    9.83   9
   5   5   2  252.69   10.53   8
  -5  -5  -2  254.82    8.16   6
  -5  -5  -2  248.76    9.32  10
   5  -5   2  273.58   13.95   1
   5  -5   2  260.69    9.35   8
  -6  -5  -2   48.10    4.73  10
   6   5   2   43.67    5.25   9
  -6   5  -2   41.67    7.21  11
  -6  -5  -2   48.89    3.56   6
   6  -5   2   53.49    7.33   1
   6  -5   2   40.86    3.40   8
  -6   5  -2   44.46    3.19  10
   6   5   2   47.43    5.47   8
   7   5   2  387.93   14.65   8
   7   5   2  359.95   13.71   9
   7  -5   2  374.27   13.49   8
   7  -5   2  360.10   19.41   1
  -7   5  -2  377.51   12.13  10
  -7  -5  -2  370.16   11.57   6
  -7  -5  -2  385.03   13.04  10
  -7   5  -2  363.99   16.08  11
   8   5   2  190.33    9.58   9
   8   5   2  181.66    9.51   8
   8  -5   2  197.55    7.98   8
   8  -5   2  189.72   13.63   1
  -8  -5  -2  196.56    8.50  10
  -8   5  -2  186.25   11.65  11
  -8   5  -2  182.96    7.20  10
  -9  -5  -2  138.74    7.93  10
   9   5   2  142.14    8.78   9
   9  -5   2  152.47   12.98   1
   9   5   2  143.85    8.96   8
  -9   5  -2  134.96    6.30  10
   9  -5   2  151.90    7.01   8
 -10  -5  -2   20.61    5.72  10
  10  -5   2   12.47    4.23   9
  10   5   2   13.15    9.06   9
  10  -5   2   23.24    9.11   1
  10   5   2   17.64    5.67   8
  11  -5   2   18.38    9.69   1
  11   5   2   -2.11    2.21   8
  11  -5   2    6.57    6.11   9
  11   5   2   -0.81    1.21   9
 -11  -5  -2    2.47    4.71  10
 -12  -5  -2   64.25    7.15  10
  12   5   2   64.58    8.66   9
 -12   5  -2   48.38   10.51  11
  12  -5   2   71.25    7.96   9
  12   5   2   64.29    8.59   8
 -13   5  -2   33.95   11.45  11
 -13  -5  -2   50.03    7.42  10
  13   5   2   49.97    9.50   8
  13   5   2   49.06    9.49   9
  13  -5   2   49.71    8.22   9
 -14   5  -2   84.14   12.64  11
 -14  -5  -2   85.67    8.36  10
  14  -5   2   97.67    9.34   9
  14   5   2   81.24    9.93   9
  14   5   2   79.95   10.01   8
  15   5   2   44.45   10.51   9
  15   5   2   46.24    9.83   8
 -15   5  -2   37.07   11.85  11
 -15  -5  -2   54.04    8.41  10
  16   5   2   32.80   12.88   9
 -16   5  -2   38.24   12.87  11
  16   5   2   49.33   10.86   8
 -16  -5  -2   26.47    8.12  10
 -17   5  -2   27.67   13.57  11
  17   5   2   23.27   11.13   8
  17   5   2   49.21   11.18   9
 -17  -5  -2   35.43    8.48  10
 -18   5  -2   14.41   12.34  11
  18   5   2   16.55   13.48   9
  18   6  -2   12.89    9.03   9
  17   6  -2   17.03   10.24   9
 -17  -6   2   15.96    8.79  10
  17   6  -2   22.83   10.66   8
 -17   6   2    8.25   11.88  11
  16   6  -2    0.72    2.21   9
  16   6  -2   14.81    9.20   8
 -16  -6   2    0.75    6.48  10
 -16   6   2    4.29    7.59  11
 -15  -6   2   21.42    7.78  10
  15   6  -2    6.56   16.06   8
 -15   6   2   10.10   10.50  11
  15   6  -2   14.31    8.04   9
  14   6  -2   41.93    7.65   8
 -14   6   2   32.88   10.70  11
 -14  -6   2   53.72    7.67  10
  14   6  -2   52.47    8.48   9
  13   6  -2   58.80    8.88   9
  13   6  -2   41.22    9.00   8
 -13   6   2   55.45   10.02  11
 -13  -6   2   51.90    6.88  10
  12   6  -2  145.42   10.39   8
  12   6  -2  168.37    9.67   9
 -12   6   2  161.73   12.03  11
  12  -6  -2  163.90    8.61   9
 -12   6   2  169.91   15.29   7
 -12  -6   2  151.91    8.85  10
  11   6  -2  108.64    8.07   9
 -11  -6   2  106.33    7.19  10
  11  -6  -2   98.20    6.98   9
 -11   6   2  117.17   10.11  11
 -11   6   2   97.19   13.62   7
  11   6  -2  102.22    8.75   8
  10  -6  -2  435.81   15.26   9
 -10   6   2  454.41   23.72   7
  10   6  -2  418.36   17.57   8
 -10   6   2  430.33   18.73  11
  10   6  -2  435.56   16.34   9
   9   6  -2    3.61   16.63   8
   9  -6  -2   25.00    9.33   1
  -9   6   2   32.61   28.56   7
  -9   6   2    3.48    4.93  11
   9   6  -2   20.38    6.08   9
   8  -6  -2   58.19    5.04   9
  -8   6   2   62.32    8.03  11
   8   6  -2   73.45    6.51   9
   8  -6  -2   78.14    9.67   1
   8  -6  -2   51.84    3.55   8
  -8   6   2   51.66    2.89  10
   8   6  -2   50.94    6.03  12
   8   6  -2   57.77    7.07   8
  -7   6   2   30.55    7.16  11
   7   6  -2   19.07    6.04   8
   7   6  -2   34.36    4.51   9
   7  -6  -2   34.44    7.47   1
  -7   6   2   27.05   16.71   7
   7   6  -2   25.66    4.25  12
   7  -6  -2   29.51    3.40   9
   6  -6  -2  155.52   10.09   1
   6  -6  -2  149.96    5.81   9
  -6   6   2  153.61    8.47  11
   6   6  -2  151.52    7.65   8
   6   6  -2  156.55    6.92   9
   6   6  -2  156.94    7.38  12
  -6   6   2  156.22   10.78   7
  -6   6   2  149.18    6.70  12
   5   6  -2   21.54    5.21   8
   5  -6  -2   22.00    2.34   9
  -5   6   2   14.03    7.91   3
  -5   6   2   18.33    3.28  12
  -5   6   2   25.92    6.85   7
   5   6  -2   20.07    4.21  12
   5  -6  -2   25.65    5.35   1
   5   6  -2   16.94    5.03   3
  -5   6   2   24.18    5.33  11
   5   6  -2   30.99    3.77   9
  -4   6   2 1180.41   44.11  12
   4   6  -2 1230.63   40.82   8
   4  -6  -2 1062.23   36.82   9
  -4   6   2 1165.93   41.73   3
   4   6  -2 1216.38   37.49   9
   4   6  -2 1197.81   41.20   3
   4  -6  -2 1230.76   52.13   1
   4   6  -2 1198.74   44.35  12
  -4   6   2 1167.05   52.46   7
  -4   6   2 1201.27   42.38  11
  -3   6   2   34.75    7.92   7
  -3   6   2   38.61    5.82  11
   3   6  -2   47.37    3.50   3
   3   6  -2   46.89    4.03  12
   3   6  -2   44.42    3.44   9
   3  -6  -2   41.61    5.54   1
   3   6  -2   44.17    3.93   8
  -3   6   2   45.19    5.07   3
   2   6  -2  712.13   26.46  12
   2   6  -2  694.76   24.31   3
   2   6  -2  704.08   24.16   8
  -2  -6   2  711.81   22.42   2
   2   6  -2  724.34   22.19   9
  -2   6   2  678.78   24.90   3
  -2   6   2  669.01   31.05   7
  -2   6   2  683.25   23.60   8
  -2   6   2  684.65   25.21  11
   1   6  -2  133.24    6.47  12
   1  -6  -2  126.22    4.59  10
  -1   6   2  129.02    7.48   7
  -1   6   2  126.20    6.56   3
  -1   6   2  130.30    7.00  11
  -1  -6   2  130.20    5.58   2
  -1   6   2  133.92    5.01   8
   1   6  -2  128.49    5.66   3
   1   6  -2  125.21    6.21  11
  -1   6   2  134.46    4.41   9
   1   6  -2  136.06    5.44   8
   1  -6  -2  128.64    4.29   5
   1   6  -2  139.58    4.96   9
   0   6   2    3.64    2.87  11
   0   6  -2    2.73    4.65   3
   0  -6  -2    3.32    1.73   5
   0   6   2    3.29    1.77   3
   0   6  -2    4.56    5.14  11
   0  -6  -2    1.05   26.32  10
   0   6  -2    3.58    1.89   9
   0   6   2    3.35    2.02   9
   0  -6  -2    3.43    1.94   6
   0   6   2    2.85    2.60   8
   0   6  -2    0.60    0.71  12
   0   6   2    3.57    3.30   7
   0   6  -2    4.21    2.61   8
   1   6   2   38.79    3.96  11
  -1  -6  -2   40.48    2.25   6
  -1   6  -2   32.32    4.13   3
  -1   6  -2   37.74    4.04  11
  -1  -6  -2   37.78    2.10   5
  -1  -6  -2   38.26    3.09  10
   1   6   2   35.57    3.11   8
  -1   6  -2   33.77    3.81  12
   1  -6   2   36.50    3.24   4
   1   6   2   38.47    2.93   9
   1   6   2   35.24    4.51   3
   1   6   2   38.57    4.18   7
  -1   6  -2   36.83    2.39   9
  -1  -6  -2   38.15    3.82   2
   2  -6   2  302.80   12.35   4
   2   6   2  316.00   11.40   8
  -2   6  -2  302.98   12.22  11
  -2  -6  -2  304.93    8.73   5
   2   6   2  318.87   10.39   9
   2   6   2  300.20   11.80   3
  -2  -6  -2  305.58    9.00   6
  -2  -6  -2  311.97   10.94   2
  -2   6  -2  291.45   11.76   3
  -2   6  -2  323.12   12.43  12
  -2  -6  -2  304.99   10.18  10
  -3  -6  -2   27.40    2.40   6
   3   6   2   28.72    3.86   9
   3  -6   2   29.54    3.77   4
  -3  -6  -2   29.62    3.64  10
  -3   6  -2   29.43    4.71  11
   3   6   2   26.42    3.77   8
  -3  -6  -2   25.09    4.29   2
  -3   6  -2   25.46    3.88  12
   3   6   2   29.74    4.34   3
  -4   6  -2  900.72   28.98  10
   4  -6   2  963.50   32.39   8
   4   6   2  990.99   33.22   8
  -4  -6  -2  978.40   26.91   6
   4   6   2  969.78   30.52   9
   4   6   2  934.33   33.98   3
  -4   6  -2  930.45   34.45  11
  -4  -6  -2  967.35   29.69  10
   5  -6   2  321.36   15.99   1
   5   6   2  316.83   11.20   9
  -5   6  -2  305.51   12.93  11
  -5   6  -2  284.65    9.66  10
  -5  -6  -2  307.98   10.73  10
   5  -6   2  290.27   10.70   8
   5   6   2  294.27   13.31   3
  -5  -6  -2  329.23    9.41   6
   5   6   2  302.38   12.01   8
   6   6   2  553.39   18.59   9
   6  -6   2  579.27   26.25   1
   6   6   2  563.39   20.10   8
  -6  -6  -2  537.43   17.91  10
  -6  -6  -2  558.16   16.08   6
   6  -6   2  522.04   18.94   8
  -6   6  -2  539.18   17.19  10
  -6   6  -2  541.38   21.16  11
  -7  -6  -2  136.61    7.11  10
   7  -6   2  132.04    5.94   8
   7   6   2  134.41    7.80   9
  -7  -6  -2  138.52    5.82   6
   7   6   2  139.82    8.02   8
   7  -6   2  128.80   11.48   1
  -7   6  -2  135.56    9.67  11
  -7   6  -2  145.91    5.63  10
   8  -6   2    0.54    3.97   1
   8   6   2    8.75    5.60   8
   8  -6   2    6.07    3.09   8
   8   6   2    3.60    4.30   9
  -8   6  -2    9.25    3.11  10
  -8   6  -2    7.56    6.00  11
  -8  -6  -2   19.62    6.00  10
  -9  -6  -2   47.24    6.34  10
   9   6   2   46.29    8.07   9
   9   6   2   52.60    8.04   8
   9  -6   2   58.51   10.75   1
  -9   6  -2   34.15   10.07  11
 -10   6  -2    3.35   68.19  11
 -10  -6  -2    8.98    6.89  10
  10  -6   2   26.34    8.77   1
  10   6   2   14.17    5.85   8
  10   6   2    6.11   82.68   9
 -11  -6  -2   89.92    7.42  10
  11   6   2   96.66    9.61   9
  11  -6   2  128.12   13.56   1
  11  -6   2   97.57    7.40   9
 -11   6  -2  100.09   11.13  11
  11   6   2  114.45    8.86   8
  12  -6   2  135.89    8.81   9
  12   6   2  130.90   10.21   9
  12  -6   2  138.07   15.61   1
 -12   6  -2  134.17   12.02  11
 -12  -6  -2  120.54    8.48  10
  12   6   2  147.50   10.22   8
 -13  -6  -2  133.04    9.09  10
  13   6   2  135.78   10.95   9
  13   6   2  154.78   10.78   8
  13  -6   2  142.57    9.40   9
 -13   6  -2  138.47   12.70  11
  14   6   2   25.30    8.48   8
 -14   6  -2   36.35   10.79  11
  14   6   2    2.02   21.91   9
 -14  -6  -2   10.40    9.36  10
 -15   6  -2   32.27   11.33  11
  15   6   2   32.38   10.53   9
 -15  -6  -2   28.72    8.16  10
  15   6   2   26.91   11.73   8
  16   6   2   10.81   12.51   9
 -16   6  -2   16.61   13.03  11
 -16  -6  -2    8.19    6.46  10
  17   6   2   19.58   10.63   9
  17   6   2   14.11    9.29   8
 -17  -6  -2   15.44   10.63  10
 -17   6  -2   14.19   12.10  11
  18   6   2   11.61   10.20   8
  18   6   2   10.40   12.28   9
 -18  -6  -2   20.20    9.88  10
 -18   6  -2    6.72   11.20  11
 -18  -7   2   -0.94    3.79  10
  18   7  -2   12.50   12.27   9
  18   7  -2    8.85   14.71   8
  17   7  -2   23.10   12.68   9
  17   7  -2   19.89   10.61   8
 -17   7   2   17.86   13.14  11
 -17  -7   2   -1.14   51.76  10
 -16   7   2   39.72   12.65  11
  16   7  -2   14.38   10.48   9
  16   7  -2   25.67    9.59   8
 -16  -7   2   19.64    9.06  10
 -15  -7   2   23.95    7.84  10
  15   7  -2   22.05    8.96   9
  15   7  -2    1.10    5.54   8
 -15   7   2   27.11   10.48  11
 -14  -7   2   18.94    7.75  10
 -14   7   2   16.41   10.57  11
  14   7  -2   28.97    9.70   8
  14   7  -2   20.77    8.24   9
 -13   7   2    8.35    7.57  11
  13   7  -2   11.32   10.63   8
  13   7  -2   28.58    6.89   9
 -13  -7   2   20.70    7.21  10
 -12   7   2    8.42    6.98  11
 -12   7   2   31.82   13.92   7
 -12  -7   2   11.36    6.62  10
  12   7  -2   -1.43   80.66   8
  12   7  -2   11.96    7.95   9
 -11   7   2  174.16   11.36  11
  11   7  -2  160.57    9.76   9
  11   7  -2  157.70   10.21   8
 -11   7   2  200.92   15.68   7
 -10   7   2  118.64   13.53   7
 -10   7   2  105.27    9.75  11
  10   7  -2   96.73    8.68   8
  10   7  -2  113.32    8.19   9
  10   7  -2   99.27    7.34  12
  10  -7  -2  114.82   12.49   1
  10  -7  -2  102.09    6.34   9
   9   7  -2  321.59   13.88  12
   9   7  -2  327.94   12.86   9
   9   7  -2  316.55   13.94   8
  -9   7   2  308.10   15.11  11
   9  -7  -2  317.70   11.53   9
   9  -7  -2  327.68   18.97   1
  -9   7   2  308.15   19.10   7
   8   7  -2  358.85   13.66   9
  -8   7   2  422.88   20.57   7
   8   7  -2  370.78   15.17  12
  -8   7   2  343.09   15.83  11
   8   7  -2  356.09   14.90   8
   8  -7  -2  347.26   19.73   1
   8  -7  -2  344.55   12.43   9
   7  -7  -2   74.92    9.15   1
  -7   7   2   56.69   11.71   7
   7   7  -2   39.58    8.18   3
  -7   7   2   64.40    7.76  11
   7  -7  -2   66.77    4.23   9
   7   7  -2   54.36    6.83   8
   7   7  -2   68.46    5.75   9
   7   7  -2   69.10    6.29  12
   6   7  -2  274.10   11.06   8
   6  -7  -2  266.30   14.48   1
  -6   7   2  248.76   14.85   7
   6   7  -2  268.42   11.45  12
  -6   7   2  262.29   10.84  12
  -6   7   2  262.17   11.82  11
   6  -7  -2  257.29    8.88   9
   6   7  -2  249.04   10.95   3
   6   7  -2  275.10   10.11   9
  -6   7   2  266.57   11.80   3
   5   7  -2  130.88    6.32   3
  -5   7   2  136.13    7.66  11
  -5   7   2  118.01    7.71   3
  -5   7   2  123.20    6.18  12
  -5   7   2  127.29    9.55   7
   5   7  -2  142.77    6.92  12
   5   7  -2  135.04    6.19   9
   5  -7  -2  123.23    4.57   9
   5  -7  -2  130.58    9.01   1
   5   7  -2  121.14    6.84   8
   4  -7  -2    2.91    8.72   1
   4   7  -2    3.23    3.94  12
  -4   7   2   -0.67    1.35   3
   4   7  -2    1.42    3.81   3
  -4   7   2    3.03    2.81  12
   4   7  -2    0.90    9.32   9
  -4   7   2    1.41    9.15   7
  -3   7   2  581.54   22.12   3
   3   7  -2  605.43   21.53   8
   3   7  -2  620.81   21.53   3
  -3  -7   2  609.57   20.04   2
   3   7  -2  608.36   19.77   9
  -3   7   2  598.66   22.58  11
   3   7  -2  614.28   23.48  12
  -3   7   2  598.70   27.79   7
   3  -7  -2  645.81   27.59   1
   2  -7  -2  284.18    9.17  10
  -2   7   2  290.46   14.24   7
   2   7  -2  275.81   11.47  11
  -2   7   2  297.40   11.73   3
   2   7  -2  293.31   10.78   3
  -2  -7   2  282.62   10.39   2
   2   7  -2  304.29   10.88   8
   2   7  -2  298.53   12.12  12
  -2   7   2  289.40   10.14   8
  -2   7   2  283.97   11.83  11
   2   7  -2  302.68    9.96   9
   1   7  -2  349.70   13.44  11
  -1  -7   2  349.89   11.98   2
  -1   7   2  350.23   11.17   9
  -1   7   2  363.08   12.34   8
   1  -7  -2  348.29   10.08   5
   1   7  -2  354.95   11.56   9
  -1   7   2  340.63   13.45   3
  -1   7   2  338.27   16.32   7
   1  -7  -2  356.08   11.11  10
   1   7  -2  355.61   12.91   3
   1   7  -2  352.74   12.59   8
  -1   7   2  350.39   13.82  11
   1   7  -2  356.74   14.24  12
   0  -7  -2  341.79    9.99   6
   0   7   2  341.15   15.71   7
   0   7   2  331.22   13.36  11
   0   7   2  352.35   12.16   8
   0   7  -2  350.00   13.77  12
   0   7   2  329.34   12.93   3
   0   7  -2  344.15   12.63   3
   0  -7  -2  331.46    9.67   5
   0   7   2  339.72   11.01   9
   0   7  -2  344.19   13.32  11
   0  -7  -2  331.55   10.94  10
   0   7  -2  348.05   11.16   9
   0   7  -2  347.42   12.14   8
  -1   7  -2   56.65    4.78   3
  -1  -7  -2   54.36    3.61  10
  -1  -7  -2   61.41    2.82   6
   1  -7   2   49.20    3.72   4
   1   7   2   56.94    4.59   7
  -1   7  -2   60.94    4.76  12
  -1  -7  -2   58.70    4.75   2
   1   7   2   54.91    5.10  11
  -1   7  -2   61.15    2.92   9
   1   7   2   53.92    3.26   9
   1   7   2   60.05    3.79   8
  -1  -7  -2   55.83    2.53   5
   1   7   2   56.44    5.28   3
  -1   7  -2   57.24    4.90  11
  -2  -7  -2  305.86    8.99   6
   2   7   2  315.21   10.42   9
  -2   7  -2  292.23   11.91   3
   2   7   2  301.30   11.90   3
  -2  -7  -2  306.19   11.03   2
  -2   7  -2  318.40   12.53  12
  -2   7  -2  304.03   12.33  11
  -2  -7  -2  301.45    8.68   5
   2   7   2  305.02   11.42   8
   2  -7   2  300.84   12.29   4
   3   7   2  636.36   23.26   3
  -3  -7  -2  642.61   18.32   6
   3  -7   2  614.62   25.12   4
  -3  -7  -2  645.82   21.37   2
  -3   7  -2  635.47   23.80  11
   3   7   2  657.42   22.78   8
  -3   7  -2  659.56   24.71  12
  -3  -7  -2  640.59   20.39  10
   3   7   2  671.72   20.94   9
  -4  -7  -2  195.29    6.19   6
  -4  -7  -2  187.22    7.47  10
   4   7   2  187.18    8.87   3
   4   7   2  190.79    7.71   9
   4   7   2  183.92    8.26   8
  -4   7  -2  180.43    9.26  11
  -5  -7  -2  527.86   16.74  10
   5   7   2  494.52   19.34   3
   5   7   2  515.56   17.24   9
  -5  -7  -2  506.03   14.87   6
   5   7   2  516.26   18.70   8
  -5   7  -2  497.09   19.60  11
  -6   7  -2    2.25    6.38  11
  -6  -7  -2    4.08    7.07  10
   6  -7   2    1.17    1.71   8
   6   7   2    1.83    2.64   8
   6   7   2   -1.59    2.57   9
  -6  -7  -2    1.95    5.38   6
  -6   7  -2    2.45    1.90  10
  -7  -7  -2   33.69    5.53  10
   7  -7   2   27.48    2.82   8
   7  -7   2   23.78    8.48   1
  -7  -7  -2   35.79    4.07   6
  -7   7  -2   25.33    3.25  10
   7   7   2   35.39    5.89   8
  -7   7  -2   24.28    7.98  11
   7   7   2   28.01    5.55   9
   8   7   2   59.85    7.48   8
  -8  -7  -2   49.41    6.49  10
   8   7   2   61.74    7.51   9
  -8  -7  -2   57.59    4.93   6
   8  -7   2   59.70   10.42   1
  -8   7  -2   57.84    8.87  11
  -9  -7  -2   55.43    6.64  10
   9   7   2   66.82    7.72   9
   9   7   2   70.71    7.75   8
   9  -7   2   63.13   12.06   1
  -9   7  -2   59.60   10.37  11
 -10   7  -2   77.50    9.74  11
  10   7   2  104.14    8.68   8
 -10  -7  -2  102.40    7.51  10
  10   7   2   94.02    8.06   9
  10  -7   2   91.94   12.24   1
 -11   7  -2  103.10   11.12  11
  11  -7   2  107.04    7.56   9
  11  -7   2  107.04   12.95   1
  11   7   2  114.34    9.19   8
 -11  -7  -2  103.41    7.73  10
  11   7   2  104.02    9.44   9
 -12   7  -2   29.74   10.41  11
  12   7   2   17.40   10.64   9
  12   7   2   36.03    8.92   8
  12  -7   2   52.99   12.91   1
 -12  -7  -2   25.29    7.56  10
  13   7   2   17.49    9.01   8
 -13   7  -2   41.31   11.37  11
  13   7   2   28.00    8.94   9
 -13  -7  -2   37.27    7.26  10
  14   7   2   11.95    7.83   8
 -14  -7  -2    5.51    8.16  10
 -14   7  -2   10.62   12.07  11
  14   7   2    1.89    7.66   9
  15   7   2   17.39    8.54   9
  15   7   2    0.65    5.74   8
 -15   7  -2   10.94   17.50  11
 -15  -7  -2    5.45   10.98  10
  16   7   2    9.65    8.22   9
 -16  -7  -2   10.38    9.05  10
  16   7   2    1.57    6.23   8
 -16   7  -2   29.72   12.97  11
 -17  -7  -2   22.56   10.00  10
  17   7   2   28.44   11.88   8
  17   7   2   16.70   14.27   9
 -17   7  -2   25.31   13.67  11
 -18  -7  -2   10.94    8.49  10
  18   7   2    5.67   11.36   8
 -18   7  -2   14.00   11.20  11
  18   7   2    7.17    9.23   9
 -19  -7  -2   13.18    8.38  10
 -19  -8   2   -1.97    6.58  10
 -18   8   2    0.98    4.67  11
  18   8  -2    2.33   14.13   8
 -18  -8   2    2.64   15.00  10
 -17   8   2   33.87   13.02  11
 -17  -8   2   28.06    9.90  10
  17   8  -2   29.11   11.07   8
  17   8  -2   30.41   10.61   9
  16   8  -2   16.65    8.69   8
 -16  -8   2   24.04    8.38  10
 -16   8   2   15.13   11.90  11
  16   8  -2   11.84    9.03   9
  15   8  -2   42.74    9.80   8
 -15   8   2   50.74   11.19  11
  15   8  -2   44.83   10.19   9
 -15  -8   2   47.36    8.93  10
 -14  -8   2   20.61    7.16  10
  14   8  -2   29.93    9.21   9
 -14   8   2   12.54    8.67  11
  14   8  -2   30.10    9.47   8
 -13  -8   2   38.24    7.79  10
  13   8  -2   33.44    9.56   9
 -13   8   2   35.42   10.43  11
  13   8  -2   30.49    8.68   8
  12   8  -2   33.62    8.43   9
 -12   8   2   35.64    8.60  11
  12   8  -2   27.66    9.71   8
 -11   8   2    7.07   33.07   7
 -11   8   2    7.89    7.17  11
 -11  -8   2    9.01    4.87  10
  11   8  -2   11.18    6.39   9
  10   8  -2   43.19    6.14   9
  10  -8  -2   44.97   11.04   1
  10   8  -2   38.18    7.56   8
  10   8  -2   30.63    5.61  12
 -10   8   2   33.61    8.62  11
  -9   8   2  407.77   17.36  11
  -9   8   2  407.08   21.79   7
   9   8  -2  405.27   15.11   9
   9   8  -2  409.21   16.68  12
   9   8  -2  381.89   16.30   8
   9   8  -2  362.54   17.12   3
   9  -8  -2  371.44   21.50   1
   8  -8  -2   40.40    9.18   1
   8  -8  -2   18.36    4.51   9
   8   8  -2   28.63    6.38   9
   8   8  -2   16.12    7.36   8
   8   8  -2    8.48   25.27   3
  -8   8   2   19.22    8.74  11
  -8   8   2   19.31   11.45   7
   8   8  -2   15.41    6.41  12
   7  -8  -2  407.06   21.13   1
  -7   8   2  400.78   16.29  12
   7   8  -2  427.68   17.01  12
   7   8  -2  436.85   15.02   9
   7   8  -2  406.14   16.20   3
  -7   8   2  425.23   17.22  11
   7   8  -2  413.82   16.22   8
   7  -8  -2  395.62   13.55   9
  -7   8   2  401.20   21.44   7
   6   8  -2   21.70    4.54   9
   6   8  -2    9.42   11.52   8
  -6   8   2    2.32    9.63   7
   6  -8  -2   13.90    9.88   1
   6   8  -2   19.01    4.31  12
  -6   8   2    9.10   10.33   3
   6   8  -2   11.24    4.66   3
  -6   8   2    8.37    5.71  12
  -6   8   2   20.36    5.78  11
   6  -8  -2   13.17    2.23   9
  -5   8   2  359.31   14.48  11
   5   8  -2  337.77   12.95   3
   5   8  -2  336.61   13.40   8
  -5   8   2  361.29   13.90  12
   5  -8  -2  353.66   17.39   1
   5   8  -2  331.28   14.24  12
  -5   8   2  331.84   17.44   7
   5   8  -2  344.28   12.25   9
  -5   8   2  343.93   14.19   3
  -4   8   2    8.74    8.97  11
   4   8  -2   10.34    3.86  12
  -4   8   2    8.04    6.44   7
  -4   8   2    5.22    5.01   3
   4   8  -2    9.18    3.99   3
   4  -8  -2    1.78    5.81   1
  -4   8   2    6.90    3.82  12
   4   8  -2    0.91   17.92   8
   4   8  -2    9.17    2.87   9
   3   8  -2   32.55    4.24   8
   3   8  -2   34.79    3.99   3
  -3   8   2   38.23    4.71   3
  -3   8   2   33.61    5.81  11
  -3   8   2   22.23   11.72   7
  -3  -8   2   31.44    5.85   2
   3   8  -2   29.78    4.73  12
  -3   8   2   26.00    1.50   8
   3   8  -2   37.19    3.73   9
   2   8  -2   16.13    3.28   8
  -2  -8   2   19.49    3.85   2
  -2   8   2   13.74    1.34   9
  -2   8   2   16.73    8.23   3
   2   8  -2   16.95    3.06   9
   2  -8  -2   12.05    2.22  10
   2   8  -2   17.62    3.69  11
  -2   8   2   12.01    2.10   8
  -2   8   2   12.77    6.43  11
   2   8  -2   14.06    3.98  12
  -2   8   2    9.87    8.72   7
  -2  -8   2   15.00    1.32   6
   2   8  -2   13.41    5.18   3
   1  -8  -2  653.61   18.36   5
   1  -8  -2  648.35   20.31  10
  -1   8   2  648.92   29.38   7
  -1   8   2  656.82   20.64   9
   1   8  -2  657.65   22.86   8
   1   8  -2  645.36   24.03  11
   1   8  -2  670.26   23.36   3
   1  -8  -2  662.69   18.61   6
   1   8  -2  671.54   20.99   9
  -1  -8   2  638.30   21.41   2
   1   8  -2  665.58   25.39  12
  -1   8   2  657.71   23.83   3
  -1   8   2  671.49   22.61   8
  -1   8   2  644.45   24.32  11
   0   8   2  325.20   13.86  11
   0   8   2  343.73   11.28   9
   0  -8  -2  346.25   10.22   6
   0   8   2  341.22   13.34   3
   0   8   2  347.01   15.99   7
   0   8  -2  354.36   11.41   9
   0   8  -2  358.39   13.80  11
   0   8  -2  354.97   12.43   8
   0  -8  -2  340.19    9.86   5
   0  -8   2  312.25    9.70   6
   0   8  -2  377.91   14.19  12
   0  -8  -2  340.00   11.20  10
   0   8  -2  340.43   13.00   3
   0   8   2  360.59   12.45   8
  -1  -8  -2  940.58   25.56   6
   1  -8   2  910.36   34.90   4
   1   8   2  908.04   28.71   9
   1   8   2  927.19   31.38   8
   1   8   2  867.09   32.84  11
  -1   8  -2  882.19   32.12   3
   1   8   2  905.09   32.22   3
   1   8   2  918.36   39.95   7
  -1  -8  -2  910.80   29.39   2
  -1  -8  -2  905.94   28.14  10
  -1   8  -2  921.01   28.63   9
  -1   8  -2  955.31   34.52  12
  -1  -8  -2  890.76   25.13   5
  -1   8  -2  889.70   32.71  11
   2   8   2   59.43    4.43   8
   2  -8   2   63.45    4.12   4
  -2  -8  -2   58.89    2.49   5
  -2  -8  -2   64.73    3.03   6
  -2  -8  -2   64.60    5.69   2
   2   8   2   61.94    4.03   9
  -2   8  -2   53.16    5.57   3
  -2   8  -2   58.71    6.20  11
   2   8   2   56.98    5.12   7
   2   8   2   62.43    5.94   3
  -2   8  -2   66.01    5.28  12
   3   8   2  124.27    7.02   3
   3   8   2  137.62    5.95   9
  -3   8  -2  116.09    6.55  12
  -3  -8  -2  121.73    5.80  10
  -3   8  -2  132.46    7.87  11
  -3  -8  -2  123.09    6.87   2
   3   8   2  116.71    6.28   8
  -3  -8  -2  129.72    4.50   6
   3  -8   2  123.73    6.35   4
   4   8   2   44.55    4.75   8
   4   8   2   49.25    4.60   9
   4   8   2   46.70    5.44   3
  -4  -8  -2   46.05    4.78  10
  -4  -8  -2   47.97    3.13   6
  -4   8  -2   45.09    4.59  12
  -4   8  -2   53.37    6.11  11
  -5  -8  -2    2.94    2.19   6
   5   8   2    4.02    3.24   8
  -5   8  -2    5.27    5.53  11
  -5  -8  -2    4.51    4.62  10
   5   8   2    2.65    3.40   9
   5  -8   2    3.73    1.35   8
   5   8   2   10.11    6.89   3
   6   8   2   14.79    5.62   8
   6   8   2    8.47    7.43   9
   6   8   2    1.39    9.60   3
  -6  -8  -2    8.32    5.11  10
  -6  -8  -2    4.80    3.56   6
   6  -8   2    4.23    1.55   8
  -6   8  -2   11.67    5.50  11
   7  -8   2  352.19   19.39   1
   7   8   2  352.53   14.43   8
  -7  -8  -2  353.63   12.82  10
  -7  -8  -2  357.23   10.99   6
   7   8   2  335.67   13.54   9
   7   8   2  332.19   15.66   3
  -7   8  -2  330.02   15.52  11
  -8  -8  -2   13.91    5.10   6
  -8  -8  -2   15.63    7.60  10
   8  -8   2   17.21   10.62   1
  -8   8  -2   16.69    9.42  11
   8   8   2   15.34    8.70   9
   8   8   2   20.09    7.07   8
   8   8   2    6.06    9.34   3
   9   8   2  111.22    9.17   9
  -9  -8  -2  117.62    7.92  10
   9   8   2  102.06   12.87   3
   9   8   2  127.02    9.19   8
  -9   8  -2  122.50   10.52  11
   9  -8   2  117.94   13.06   1
 -10   8  -2   61.47    9.69  11
  10   8   2   54.93    8.54   9
  10  -8   2   55.88   11.55   1
  10   8   2   46.47    7.88   8
 -10  -8  -2   53.54    6.68  10
  10   8   2   37.89   15.52   3
  11   8   2   24.12    9.43   8
  11  -8   2   33.18   11.45   1
 -11  -8  -2   28.73    7.76  10
  11   8   2   15.13    8.61   9
 -11   8  -2   23.40   10.59  11
 -12  -8  -2   22.56    6.96  10
  12  -8   2   33.57   13.03   1
 -12   8  -2   32.72   10.13  11
  12   8   2   50.48   10.28   8
  12   8   2   15.64    7.27   9
  13   8   2    6.04    7.60   9
 -13  -8  -2    8.14    8.63  10
  14   8   2   23.68    8.19   8
 -14   8  -2   10.04    7.53  11
 -14  -8  -2   24.28    7.96  10
 -15   8  -2   17.93   12.77  11
 -15  -8  -2   17.62    8.46  10
  15   8   2   11.54    9.81   9
  15   8   2    1.56   36.63   8
  16   8   2    6.91    7.00   8
  16   8   2   18.96   14.29   9
 -16   8  -2   42.60   13.51  11
 -16  -8  -2   16.88    9.73  10
 -17   8  -2   -2.03   24.17  11
 -17  -8  -2    9.39    7.98  10
  17   8   2   18.20   10.32   9
  17   8   2    0.43   10.87   8
  18   8   2    5.13   12.24   8
 -18  -8  -2    3.31   10.58  10
 -19  -8  -2    4.44    7.70  10
  18   9  -2    3.56    7.25   8
  18   9  -2    4.50    8.63   9
 -18  -9   2    0.55    2.71  10
  17   9  -2    6.53    7.06   9
 -17   9   2    8.17   15.08  11
 -17  -9   2   13.54   10.83  10
  17   9  -2   -2.04    6.31   8
 -16  -9   2   20.89   10.21  10
  16   9  -2   26.68   10.82   9
  16   9  -2   23.43   10.12   8
 -16   9   2    5.12   12.87  11
 -15  -9   2   14.97    8.66  10
 -15   9   2   26.02   11.88  11
  15   9  -2   32.97   11.41   9
  15   9  -2   12.54    8.61   8
  14   9  -2   26.83    9.28   8
 -14  -9   2   31.50    8.67  10
  14   9  -2   26.98    8.66   9
 -14   9   2   17.32   11.05  11
 -13  -9   2   65.12    8.61  10
 -13   9   2   63.38   10.66  11
  13   9  -2   68.22    9.21   8
  13   9  -2   66.08    9.35   9
 -12  -9   2   41.37    7.20  10
  12   9  -2   28.58    7.23   9
 -12   9   2   34.56   10.18  11
  12   9  -2   20.98   10.37   8
  11  -9  -2   52.04   11.94   1
  11   9  -2   34.16    7.88   8
 -11   9   2   44.83   15.00   7
  11   9  -2   50.44    7.60   9
 -11  -9   2   49.39    7.63  10
 -11   9   2   45.17    9.85  11
  10  -9  -2   40.49   10.40   1
 -10   9   2   19.19    7.95  11
  10   9  -2   21.31    8.77   9
  10   9  -2    8.64    7.85  12
  10   9  -2   12.91    6.51   8
 -10   9   2   58.82   15.77   7
  -9   9   2   11.37    9.03  11
   9   9  -2    8.43   10.18   8
   9   9  -2   17.90    7.50   9
   9  -9  -2   25.40    9.67   1
  -9   9   2   26.37   23.43   7
   8   9  -2  218.74   12.15  12
   8  -9  -2  249.72   16.02   1
   8   9  -2  247.90   11.63   3
   8   9  -2  243.36   10.84   9
  -8   9   2  266.32   12.96  11
   8   9  -2  241.83   11.87   8
  -7   9   2   23.18    4.86  12
   7   9  -2   30.69    6.84  12
   7   9  -2   19.48    6.87   8
   7   9  -2   24.58    5.75   9
   7  -9  -2   21.27    8.70   1
  -7   9   2   21.90   34.92   7
  -7   9   2   11.98   14.15  11
   7   9  -2   25.84    7.05   3
  -6   9   2  430.80   17.90  12
   6   9  -2  473.04   16.90   3
  -6   9   2  443.71   22.58   7
   6   9  -2  435.71   15.79   9
   6   9  -2  449.60   17.30   8
   6   9  -2  429.71   18.43  12
   6  -9  -2  465.28   22.50   1
  -6   9   2  470.48   18.61  11
  -6   9   2  456.33   18.32   3
  -5   9   2  280.31   13.16  11
  -5   9   2  292.15   12.84   3
   5  -9  -2  291.30   15.50   1
   5   9  -2  293.41   11.34   3
  -5   9   2  282.37   12.13  12
   5   9  -2  266.73   11.80   8
   5   9  -2  289.72   10.73   9
   5   9  -2  299.20   12.76  12
  -5   9   2  270.98   15.48   7
   4   9  -2    3.14    5.30   8
   4   9  -2   10.05    5.34   9
   4   9  -2   10.09    5.76   3
  -4   9   2   12.14    6.20   3
  -4   9   2    2.53    5.52  11
  -4   9   2    7.30    3.02  12
  -4   9   2    7.83   13.29   7
   4   9  -2   11.27    4.96  12
   4  -9  -2    7.77    6.65   1
  -3   9   2  720.46   28.04  12
  -3   9   2  748.53   26.64   3
   3   9  -2  774.97   23.74   9
   3   9  -2  783.08   28.44  12
   3  -9  -2  646.65   22.32  10
   3   9  -2  768.47   25.94   3
  -3  -9   2  752.83   24.15   2
   3   9  -2  786.81   25.94   8
  -3   9   2  740.81   27.13  11
  -3   9   2  722.57   33.07   7
  -3   9   2  639.76   24.87   8
  -2   9   2  391.96   13.83   8
   2  -9  -2  399.59   12.53  10
   2   9  -2  406.38   16.29  12
   2   9  -2  418.62   13.32   9
  -2   9   2  398.81   15.32   3
  -2   9   2  402.68   18.89   7
  -2  -9   2  412.28   13.94   2
  -2   9   2  397.88   15.76  11
   2   9  -2  415.99   14.69   3
   2   9  -2  408.20   14.48   8
  -2   9   2  352.20   12.52   9
  -2  -9   2  372.35   11.14   6
   2   9  -2  392.70   15.48  11
   1   9  -2  397.70   13.10   9
  -1   9   2  408.62   15.43   3
   1   9  -2  401.93   14.66   3
  -1   9   2  389.61   12.67   9
   1  -9  -2  389.72   12.63  10
  -1   9   2  399.58   15.89  11
   1  -9  -2  392.32   11.57   6
  -1   9   2  387.54   18.44   7
  -1  -9   2  395.21   13.72   2
   1  -9  -2  379.52   11.36   5
  -1   9   2  405.34   14.00   8
   1   9  -2  396.64   14.29   8
   1   9  -2  409.41   16.13  12
   1   9  -2  383.99   15.49  11
   0   9  -2  884.32   32.85  12
   0   9   2  857.57   31.35  11
   0   9   2  861.19   30.69   3
   0   9  -2  861.65   29.62   8
   0   9  -2  891.87   31.27  11
   0   9   2  858.52   27.10   9
   0  -9  -2  881.98   24.26   6
   0  -9   2  759.06   23.86   6
   0   9   2  881.67   29.65   8
   0  -9  -2  848.56   26.58  10
   0   9  -2  900.14   27.23   9
   0   9  -2  861.24   30.42   3
   0  -9  -2  850.97   23.81   5
   0   9   2  844.85   37.95   7
  -1   9  -2  153.23    6.04   8
   1   9   2  150.43    5.77   9
   1   9   2  151.69    8.27  11
  -1   9  -2  147.64    5.58   9
  -1   9  -2  153.08    7.81  12
  -1  -9  -2  141.59    4.68   5
   1   9   2  153.92    7.45   3
  -1   9  -2  141.68    7.36   3
  -1   9  -2  150.22    7.90  11
   1   9   2  146.85    7.92   7
   1  -9   2  148.12    6.55   4
  -1  -9  -2  149.58    5.99  10
  -1  -9  -2  142.80    7.37   2
  -1  -9  -2  142.77    5.09   6
   1   9   2  153.49    6.58   8
  -2   9  -2  469.91   18.46  12
   2   9   2  477.04   17.38   3
  -2  -9  -2  474.75   15.11  10
  -2  -9  -2  464.00   13.37   6
   2   9   2  467.67   16.78   8
  -2  -9  -2  440.76   12.93   5
   2   9   2  474.13   15.27   9
  -2  -9  -2  464.33   16.12   2
   2   9   2  443.89   20.70   7
  -2   9  -2  454.63   17.80  11
  -2   9  -2  457.17   17.39   3
   2  -9   2  478.80   18.20   4
  -3   9  -2  638.11   24.88  12
  -3  -9  -2  643.14   21.65   2
   3   9   2  671.17   20.99   9
   3  -9   2  613.83   25.05   4
  -3   9  -2  642.11   24.06  11
  -3  -9  -2  648.18   18.31   6
  -3   9  -2  651.90   23.51   3
   3   9   2  658.85   23.41   3
   3   9   2  653.92   22.93   8
  -3  -9  -2  601.01   20.48  10
  -4   9  -2    6.55   25.66  11
  -4   9  -2   13.70    6.02  12
   4   9   2   16.31    4.19   9
  -4  -9  -2   17.28    5.26  10
   4   9   2   19.11    5.58   3
   4   9   2    9.71    5.63   8
  -4  -9  -2   18.56    2.53   6
   5   9   2  386.54   13.84   9
  -5  -9  -2  378.13   13.35  10
   5   9   2  380.12   15.23   3
  -5   9  -2  375.55   15.94  11
  -5  -9  -2  387.92   11.51   6
   5   9   2  369.01   14.89   8
   6   9   2  126.34    8.11   8
  -6  -9  -2  143.47    7.43  10
   6   9   2  132.08    9.40   3
  -6   9  -2  118.80    9.32  11
   6   9   2  135.59    7.85   9
   6  -9   2  121.05   12.24   1
  -6  -9  -2  134.82    5.56   6
  -7  -9  -2  156.20    8.35  10
  -7  -9  -2  164.85    6.49   6
   7   9   2  152.12    9.42   8
  -7   9  -2  150.41   10.70  11
   7   9   2  158.89    8.91   9
   7   9   2  166.64   10.71   3
   7  -9   2  151.50   13.46   1
   8   9   2  243.93   13.90   3
  -8   9  -2  250.53   13.26  11
   8   9   2  231.88   11.70   9
   8   9   2  241.84   12.26   8
   8  -9   2  253.72   16.79   1
  -8  -9  -2  258.69    8.89   6
  -8  -9  -2  256.89   10.83  10
   9  -9   2    0.13    1.40   1
  -9  -9  -2    7.08    5.92  10
   9   9   2    2.19   24.21   9
  -9   9  -2    1.35    8.61  11
  10   9   2   26.05   13.75   3
  10   9   2   47.53    8.48   9
  10   9   2   42.30    8.61   8
 -10   9  -2   56.67    9.20  11
 -10  -9  -2   47.18    6.91  10
  10  -9   2   69.32   11.77   1
 -11   9  -2   -0.51    4.73  11
  11  -9   2    7.64   11.10   1
  11   9   2   -0.81    6.58   9
 -11  -9  -2    0.16   10.73  10
  11   9   2   12.88    8.15   8
 -12   9  -2   15.29    9.59  11
 -12  -9  -2    7.33    8.20  10
  12  -9   2   27.02   13.01   1
  12   9   2   -1.31    3.15   8
 -13  -9  -2   16.54    7.71  10
  13  -9   2   40.72   14.39   1
 -13   9  -2   18.40    9.69  11
  13   9   2   23.62   11.47   8
  13   9   2   21.75    8.00   9
  14   9   2    9.14    6.53   9
 -14  -9  -2   20.34    9.15  10
 -14   9  -2   13.75   11.53  11
  14   9   2   23.01    8.77   8
 -15  -9  -2    4.07   17.14  10
  15   9   2    3.78    7.27   9
  15   9   2    6.02   10.38   8
 -15   9  -2    1.12    3.00  11
  16   9   2   19.74    9.35   9
 -16   9  -2   13.76   13.82  11
  17   9   2   -1.85    7.06   8
 -17   9  -2   -1.54    6.93  11
  17   9   2   -0.38   11.65   9
  18   9   2    7.90   18.66   8
  18  10  -2    0.84    6.90   8
 -17 -10   2   26.90    9.68  10
  17  10  -2   14.98   11.48   9
  17  10  -2   26.19   12.37   8
  16  10  -2    6.62   13.01   9
 -16  10   2   14.48   12.20  11
  16  10  -2    7.73   11.77   8
 -16 -10   2   17.69   10.87  10
  15  10  -2   25.54    9.88   8
 -15  10   2    4.09  378.05  11
  15  10  -2   11.18    8.32   9
 -15 -10   2   -2.22    7.57  10
  14  10  -2    4.75    9.06   8
 -14  10   2   26.76   12.27  11
  14  10  -2   17.64    8.24   9
 -14 -10   2    8.01    7.71  10
  13  10  -2    6.88    8.64   8
 -13 -10   2   12.91    7.88  10
 -13  10   2    0.63    5.52  11
  13  10  -2    0.34    0.96   9
 -12  10   2  187.83   13.08  11
  12  10  -2  185.09   11.22   9
 -12 -10   2  187.89   10.30  10
  12  10  -2  184.00   11.86   8
  11  10  -2    5.71    5.62   9
 -11 -10   2    0.43    1.55  10
  11 -10  -2   25.00   11.93   1
 -11  10   2   15.25   80.24   7
  11  10  -2   -1.89    3.42   8
 -10  10   2   74.92   10.08  11
  10  10  -2   65.01    8.06   8
  10  10  -2   64.76    7.66   9
  10 -10  -2   75.66   11.95   1
 -10  10   2   65.60   12.61   7
  10  10  -2   62.25    7.40  12
   9 -10  -2   24.94    9.06   1
  -9  10   2   13.35    7.14  11
   9  10  -2   15.96    9.76   8
   9  10  -2   20.15    6.25   9
   9  10  -2    4.05   11.81  12
   8  10  -2    2.14    3.28   9
   8 -10  -2   12.47    7.64   1
   7  10  -2    4.85  610.11  12
   7  10  -2   12.28    5.65   9
   7  10  -2    8.10    7.39   3
   7 -10  -2   17.35    6.95   1
   7  10  -2    7.81    6.31   8
  -7  10   2    4.78   11.08  11
  -6  10   2  351.55   15.17   3
  -6  10   2  356.76   14.49  12
  -6  10   2  338.03   15.60  11
   6  10  -2  333.20   14.18   8
   6  10  -2  337.17   12.87   9
  -6  10   2  349.00   18.77   7
   6  10  -2  339.72   13.62   3
   6 -10  -2  345.86   18.63   1
   6  10  -2  349.89   15.09  12
   5  10  -2    5.07    5.87   3
   5  10  -2    6.91    6.12  12
  -5  10   2   11.93    8.74   7
  -5  10   2    9.04    6.69   3
   5 -10  -2    6.99    7.75   1
  -5  10   2    4.49   22.63  12
   5  10  -2    3.17    6.42   9
   5  10  -2    8.79    7.43   8
  -5  10   2    5.04   37.31  11
  -4  10   2 1480.11   54.85  11
   4  10  -2 1550.52   48.49   9
   4  10  -2 1544.75   52.79   8
  -4  10   2 1517.10   54.02   3
   4  10  -2 1549.32   53.31   3
  -4  10   2 1470.22   67.60   7
   4  10  -2 1542.96   57.69  12
  -4  10   2 1518.47   57.36  12
   4 -10  -2 1603.90   67.53   1
   3  10  -2   29.93    4.62   8
  -3  10   2   45.09    6.25   3
   3  10  -2   42.60    4.32   9
   3  10  -2   38.08    4.91   3
  -3  10   2   45.96    5.14  12
   3  10  -2   49.01    5.64  12
  -3  10   2   33.14    2.32   8
   3 -10  -2   38.29    2.24  10
  -3 -10   2   31.94    5.76   2
  -3  10   2   40.74    7.93   7
  -3  10   2   32.15    6.78  11
  -2  10   2 1000.00   35.59   8
   2 -10  -2 1059.48   32.02  10
   2  10  -2 1085.27   33.21   9
  -2  10   2 1071.12   38.08  11
   2  10  -2 1092.38   39.87  12
  -2  10   2 1069.41   46.38   7
   2  10  -2 1042.53   37.73  11
   2  10  -2 1030.95   36.14   8
   2  10  -2 1088.47   36.78   3
  -2  10   2  915.68   32.59   9
  -2 -10   2 1046.76   33.78   2
  -2  10   2 1052.83   37.18   3
   1  10  -2   31.36    3.67   3
   1  10  -2   29.30    5.21  12
   1 -10  -2   31.89    2.89   6
  -1  10   2   29.83    3.20   8
  -1  10   2   27.01    6.14   7
   1  10  -2   26.23    3.06   9
  -1  10   2   24.06    6.73  11
  -1  10   2   19.57    2.63   9
   1 -10  -2   28.89    3.21  10
   1  10  -2   29.09    4.99  11
   1 -10  -2   19.39    3.03   5
  -1 -10   2   24.60    4.88   2
  -1  10   2   29.61    5.66   3
   1  10  -2   29.36    3.67   8
   0  10  -2  162.56    8.43  12
   0  10   2  151.96    8.71   7
   0 -10   2  128.40    4.44   6
   0  10  -2  157.29    7.43   3
   0 -10  -2  152.21    5.41   6
   0  10   2  152.29    8.29   3
   0  10   2  145.44    8.73  11
   0  10  -2  152.10    8.77  11
   0 -10  -2  158.92    6.09  10
   0  10   2  155.94    6.55   8
   0  10   2  154.56    5.74   9
   0  10  -2  165.64    5.94   9
   0 -10  -2  150.34    4.96   5
   0  10  -2  154.89    6.44   8
   1  10   2   41.16    3.70   9
  -1 -10  -2   38.84    5.36   2
   1  10   2   42.25    4.72   7
   1  10   2   49.71    5.40  11
   1 -10   2   44.59    3.23   4
  -1  10  -2   36.58    5.00  12
   1  10   2   43.77    5.45   3
  -1  10  -2   48.78    5.14  11
  -1  10  -2   40.12    3.36   8
  -1 -10  -2   55.57    4.12  10
  -1  10  -2   41.73    5.24   3
  -1 -10  -2   41.17    2.92   6
   1  10   2   39.76    4.14   8
  -1 -10  -2   39.12    2.33   5
  -1  10  -2   41.24    3.21   9
   2  10   2  371.37   14.27   3
  -2  10  -2  362.26   14.32   3
  -2  10  -2  365.24   14.84  11
   2  10   2  350.11   16.36   7
  -2 -10  -2  364.19   12.27  10
  -2 -10  -2  384.89   13.50   2
   2 -10   2  361.23   14.38   4
  -2  10  -2  360.23   15.07  12
   2  10   2  370.43   12.28   9
  -2 -10  -2  323.02   10.11   5
   2  10   2  364.76   13.58   8
  -2 -10  -2  365.57   10.64   6
  -3  10  -2   11.36    5.32  12
   3  10   2   15.20    4.34   8
   3 -10   2   17.74    3.95   4
   3  10   2   13.04    5.68   3
  -3  10  -2   11.18    7.18  11
  -3 -10  -2   10.81    3.94  10
  -3 -10  -2   21.52    5.61   2
  -3 -10  -2   15.28    2.82   6
   3  10   2   24.71    3.64   9
   3  10   2    9.70    5.55   7
  -3  10  -2   13.58   10.14   3
  -4 -10  -2  594.56   21.28   2
  -4 -10  -2  637.50   17.75   6
   4  10   2  650.68   22.85   3
  -4  10  -2  626.11   24.22  12
  -4  10  -2  590.66   23.66  11
  -4 -10  -2  585.92   20.02  10
   4  10   2  608.47   22.43   8
   4  10   2  624.94   20.54   9
  -5 -10  -2   -0.87    1.93   6
   5  10   2    0.82    1.25   9
   5  10   2   13.26    5.19   8
  -5 -10  -2    2.09    6.32  10
  -6  10  -2  496.90   20.31  11
   6  10   2  467.12   19.00   8
   6  10   2  502.59   19.32   3
   6 -10   2  517.92   25.20   1
  -6 -10  -2  496.48   17.01  10
  -6 -10  -2  495.20   14.76   6
   6  10   2  480.33   17.51   9
  -7 -10  -2   13.42    3.84   6
  -7  10  -2   12.36    6.39  11
   7  10   2    4.72    5.46   8
   7 -10   2    1.26   53.75   1
  -7 -10  -2   16.93    6.88  10
   7  10   2   14.48    5.64   3
   8 -10   2   15.92   11.53   1
  -8 -10  -2   17.05    7.07  10
  -8  10  -2   21.45    8.89  11
   8  10   2   33.85    7.41   8
   8  10   2   34.39    8.09   3
   8  10   2    8.31    9.90   9
  -9  10  -2   10.21    6.80  11
  -9 -10  -2   21.73    6.87  10
   9 -10   2   17.90   11.20   1
   9  10   2    7.62    7.96   3
   9  10   2    4.61    9.62   8
 -10  10  -2   34.17   10.02  11
  10  10   2   28.63    9.22   9
 -10 -10  -2   43.03    7.82  10
  10  10   2   38.23   10.82   3
  10 -10   2   52.54   11.92   1
  10  10   2   41.04    8.15   8
  11  10   2    9.88    5.87   9
  11 -10   2   13.62   12.39   1
 -11 -10  -2    5.85    5.15  10
  11  10   2    3.33   13.63   8
 -11  10  -2    5.64    8.77  11
  12  10   2   40.40    9.77   8
  12 -10   2   56.97   13.78   1
 -12  10  -2   43.05   11.64  11
  12  10   2   29.00    7.54   9
 -12 -10  -2   37.14    8.57  10
  13  10   2   -0.75    2.56   9
  13 -10   2   23.61   15.07   1
  13  10   2    4.03   33.02   8
 -13  10  -2   13.34   11.49  11
 -13 -10  -2    3.03    6.52  10
 -14 -10  -2    6.99    7.55  10
 -14  10  -2    1.16   10.53  11
  14  10   2    3.65   11.54   8
 -15 -10  -2   15.94    8.70  10
  15  10   2    5.48    5.44   9
  15  10   2    4.08    9.41   8
 -15  10  -2   13.22   12.25  11
 -16  10  -2   -2.09   99.28  11
  17  10   2   12.43   11.53   8
  17  10   2   23.06    9.14   9
 -17 -10  -2   -0.91    8.33  10
 -17  10  -2   18.28   12.82  11
 -18 -11   2    1.81    6.29  10
 -17 -11   2   19.90   10.62  10
  17  11  -2   -1.20   54.18   9
 -17  11   2    4.42    9.57  11
  17  11  -2    7.19    9.33   8
  16  11  -2   15.45   11.02   8
 -16  11   2   23.94   12.14  11
 -16 -11   2   20.05    9.62  10
  16  11  -2    3.94    7.96   9
 -15 -11   2    8.05    9.67  10
 -14  11   2   23.72   11.74  11
  14  11  -2    6.06    9.23   9
  14  11  -2    6.82   22.82   8
 -14 -11   2    8.07    8.41  10
 -13 -11   2   57.70    8.79  10
 -13  11   2   51.85   10.49  11
  13  11  -2   44.33    8.67   8
  13  11  -2   37.30    9.66   9
  12  11  -2    3.21   12.16   8
 -12 -11   2    6.97   10.08  10
  12  11  -2   19.95    8.60   9
 -12  11   2    8.01   15.56  11
 -11  11   2   64.32   10.19  11
 -11 -11   2   91.02    8.01  10
  11  11  -2   73.99    8.97   8
  11  11  -2   73.64    8.42   9
 -11  11   2   65.95   16.07   7
  11 -11  -2   77.39   13.11   1
  10 -11  -2   38.46   10.76   1
  10  11  -2   23.15    8.43  12
  10  11  -2   27.62    7.22   9
  10  11  -2   13.40   10.37   8
 -10  11   2   73.23   16.13   7
 -10  11   2   35.19    9.83  11
  -9  11   2    2.09  773.23  11
   9  11  -2    2.81   19.40  12
   9  11  -2    5.55    8.29   8
   9 -11  -2   17.17    9.27   1
  -9  11   2   21.45   20.50   7
   9  11  -2   14.89    7.72   9
   8  11  -2  156.96    9.88   8
   8  11  -2  174.00    9.16   9
   8  11  -2  149.81   10.36  12
   8 -11  -2  160.39   13.26   1
  -8  11   2  159.71   11.18  11
   7  11  -2  114.57    7.98   9
  -7  11   2   98.97    7.13  12
   7  11  -2   95.49    8.52   8
  -7  11   2  104.72   10.81  11
   7 -11  -2  121.41   12.14   1
   7  11  -2  121.08    8.62  12
  -7  11   2  114.80   11.60   7
   6 -11  -2  234.19   15.24   1
  -6  11   2  229.41   11.30  12
   6  11  -2  231.01   11.35   8
   6  11  -2  261.58   10.58   9
   6  11  -2  234.44   10.58   3
  -6  11   2  263.23   15.50   7
  -6  11   2  234.78   12.91  11
   6  11  -2  235.80   12.34  12
  -6  11   2  241.08   12.79   3
   5  11  -2  419.22   17.20  12
  -5  11   2  393.98   16.44  12
   5  11  -2  406.43   14.37   9
  -5  11   2  394.90   20.30   7
  -5  11   2  391.00   16.75   3
   5  11  -2  395.74   15.09   3
   5  11  -2  384.40   15.59   8
  -5  11   2  376.01   16.91  11
   5 -11  -2  382.79   20.38   1
   4  11  -2   23.45    5.60   9
   4 -11  -2   18.80    9.55   1
  -4  11   2   37.65    5.72  12
  -4 -11   2   19.10    7.52   2
   4  11  -2   25.86    5.75   3
  -4  11   2   32.40    7.76  11
   4  11  -2   24.55    5.59   8
  -4  11   2   35.67    6.68   3
  -4  11   2   30.62    8.43   7
   4  11  -2   33.31    7.33  12
   3  11  -2  821.19   31.46  12
   3  11  -2  838.89   26.20   9
   3  11  -2  810.22   28.48   8
  -3  11   2  705.89   27.51   8
  -3  11   2  821.31   30.11  11
   3 -11  -2  771.93   24.75  10
  -3  11   2  809.69   29.53   3
  -3  11   2  821.59   36.50   7
  -3  11   2  810.21   31.22  12
   3  11  -2  843.93   28.80   3
  -3 -11   2  838.51   26.79   2
   2  11  -2  242.47   10.14   3
   2  11  -2  238.87   11.30  11
   2  11  -2  234.30    9.53   8
   2  11  -2  235.87   11.28  12
  -2  11   2  229.58   12.60   7
   2 -11  -2  230.58    7.47   5
  -2  11   2  238.95   11.96  11
  -2  11   2  215.26    8.65   8
  -2  11   2  230.96   10.75   3
   2 -11  -2  234.18    8.14  10
   2  11  -2  240.97    8.68   9
  -2 -11   2  224.24    9.98   2
  -2  11   2  236.42   11.08  12
   1 -11  -2  355.36   10.53   6
   1 -11  -2  342.29   10.22   5
  -1  11   2  337.80   12.61   8
  -1  11   2  365.85   14.49   3
  -1  11   2  342.04   16.82   7
  -1  11   2  321.71   11.35   9
   1  11  -2  340.49   13.47   3
   1  11  -2  358.50   14.51  11
   1  11  -2  357.89   15.01  12
  -1  11   2  335.01   14.96  11
   1  11  -2  357.66   13.00   8
  -1 -11   2  349.73   12.93   2
   1  11  -2  346.49   11.87   9
   1 -11  -2  349.84   11.52  10
   0  11   2  661.66   23.81   8
   0  11  -2  690.03   23.81   8
   0  11  -2  705.31   26.72  12
   0  11   2  682.58   25.71  11
   0  11  -2  688.68   25.58  11
   0 -11  -2  637.05   18.99   5
   0 -11  -2  671.54   21.43  10
   0  11   2  656.23   21.65   9
   0  11  -2  689.03   24.62   3
   0  11  -2  680.95   21.83   9
   0 -11  -2  687.65   19.44   6
   0  11   2  681.85   30.43   7
   0  11   2  706.87   25.04   3
   1  11   2   -1.95    1.63   7
  -1  11  -2   -0.93    1.46   8
  -1  11  -2    1.62    1.42  11
  -1  11  -2   -1.97    2.53  12
  -1  11  -2    2.42    4.95   3
  -1 -11  -2    4.75    3.17  10
   1 -11   2    5.86    2.32   4
   1 -11   2    3.95    1.79   6
  -1 -11  -2    3.10    2.39   5
  -1 -11  -2   -2.26    2.41   6
   1  11   2   -1.53    5.52   9
   1  11   2    2.08    7.12   3
  -1  11  -2    4.93    2.80   9
  -1 -11  -2    4.90   25.12   2
  -2  11  -2  486.97   19.48  12
  -2  11  -2  495.93   18.38   3
   2  11   2  478.32   18.05   3
   2  11   2  483.12   17.63   8
   2  11   2  425.74   21.15   7
  -2 -11  -2  490.03   17.16   2
  -2 -11  -2  473.43   13.84   6
   2  11   2  486.83   15.97   9
  -2 -11  -2  470.82   15.84  10
  -2  11  -2  491.50   18.89  11
   2 -11   2  477.67   18.68   4
  -3 -11  -2  371.23   14.01   2
  -3 -11  -2  356.63   10.85   6
   3  11   2  370.66   12.83   9
  -3 -11  -2  375.27   12.84  10
  -3  11  -2  365.04   14.86   3
   3  11   2  387.57   14.89   3
   3 -11   2  365.37   14.75   4
   3  11   2  365.28   14.23   8
   3  11   2  322.62   16.36   7
  -3  11  -2  349.02   15.45  12
  -3  11  -2  376.93   15.47  11
   4  11   2   44.16    7.30   3
   4  11   2   54.51    6.31   8
   4  11   2   48.84    5.50   9
  -4  11  -2   42.29    6.43  12
  -4  11  -2   53.57    8.11  11
  -4 -11  -2   50.32    7.71   2
  -4 -11  -2   58.25    5.86  10
  -4 -11  -2   52.40    3.73   6
   5  11   2  593.53   21.58   3
   5  11   2  576.75   19.42   9
  -5  11  -2  556.23   22.58  11
  -5 -11  -2  585.39   16.61   6
  -5 -11  -2  554.13   18.99  10
   5  11   2  526.43   21.21   8
  -5  11  -2  565.17   22.65  12
  -6 -11  -2   22.66    4.24   6
   6 -11   2   18.89   18.27   1
   6  11   2   20.31    6.89   8
  -6 -11  -2   31.91    6.19  10
  -6  11  -2    6.91  157.50  11
   6  11   2   40.84    6.59   9
   6  11   2   31.24    9.38   3
  -7  11  -2  184.03   11.90  11
   7  11   2  165.89   10.20   8
   7  11   2  192.06   10.50   3
   7 -11   2  164.57   15.00   1
  -7 -11  -2  179.37    9.17  10
   7  11   2  180.70    9.24   9
  -7 -11  -2  195.33    7.10   6
   8  11   2  153.88    9.45   3
  -8  11  -2  133.45   10.42  11
   8 -11   2  123.03   13.47   1
   8  11   2  128.90    9.37   8
   8  11   2  120.24    8.28   9
  -8 -11  -2  128.41    8.19  10
   9  11   2    5.14    6.33   9
   9  11   2    8.67    7.55   8
  -9  11  -2    1.38    9.33  11
  10 -11   2   84.83   13.10   1
  10  11   2   65.79    9.66   8
 -10 -11  -2   50.73    7.56  10
 -10  11  -2   69.43   10.63  11
  10  11   2   74.66    8.47   9
 -11 -11  -2   34.45    8.15  10
 -11  11  -2   38.03    9.78  11
  11  11   2   52.32    9.42   8
  11  11   2   50.66    7.93   9
  11 -11   2   57.83   13.34   1
  12 -11   2   23.21   12.27   1
 -12  11  -2    0.40    4.02  11
  12  11   2   -0.56   33.07   9
 -12 -11  -2    4.65   10.60  10
  12  11   2   -2.26   17.37   8
  13  11   2   29.31   10.01   8
  13 -11   2   52.14   15.89   1
 -13 -11  -2   15.95    7.75  10
 -13  11  -2   36.78   10.86  11
  13  11   2   35.29    8.31   9
  14  11   2    5.91   10.66   9
 -14  11  -2    0.58   42.98  11
 -15 -11  -2    8.03    9.47  10
 -15  11  -2    9.65    9.06  11
  15  11   2    9.88    9.43   9
  15  11   2   10.74   11.48   8
 -16  11  -2    6.03    9.61  11
  16  11   2    9.43   24.63   8
 -16 -11  -2    4.79    7.55  10
  16  11   2   15.86   11.11   9
 -17 -11  -2    6.65   20.81  10
  17  11   2   -0.92    4.35   8
 -17 -12   2   11.61   13.23  10
  17  12  -2   12.22   10.97   8
  17  12  -2   11.85   13.00   9
 -16 -12   2   12.65    7.85  10
  16  12  -2   26.65   12.52   9
  16  12  -2    5.56   11.26   8
 -16  12   2    9.97   15.04  11
 -15  12   2   21.56   13.58  11
  15  12  -2   25.61   11.22   9
 -15 -12   2   31.65    9.75  10
  15  12  -2   12.96   10.35   8
 -14  12   2    4.94   11.73  11
  14  12  -2    8.06    7.72   9
 -14 -12   2    9.13   10.92  10
  14  12  -2   13.54    7.67   8
  13  12  -2   15.40   13.36   8
  13  12  -2   30.52    8.20   9
 -13  12   2   32.17   12.36  11
 -13 -12   2   26.79    8.63  10
  12  12  -2    7.31    8.94   8
  12  12  -2   16.47    8.09   9
  12 -12  -2   23.40   11.42   1
 -12  12   2   10.41    7.60  11
 -12 -12   2   12.42    8.91  10
 -11 -12   2    2.38    6.31  10
  11 -12  -2   27.28   13.44   1
 -11  12   2   21.14    9.33  11
  11  12  -2   23.40    7.60   8
  11  12  -2   10.82    7.80   9
  10  12  -2    0.61    4.86   8
 -10  12   2   13.63    8.42  11
  10 -12  -2   26.33   10.70   1
 -10  12   2   64.28   15.72   7
  10  12  -2    2.92    3.84   9
  -9  12   2  187.95   14.83   7
  -9  12   2  151.47   11.82  11
   9  12  -2  142.04    9.41   9
   9  12  -2  154.31   10.29   8
   9  12  -2  144.96   10.17  12
   9 -12  -2  154.11   13.83   1
   8  12  -2   -2.44    3.11   8
  -8  12   2   -0.35    1.00   7
  -8  12   2   -2.15    3.34  11
   8  12  -2   -1.18    2.87  12
   8 -12  -2    9.28    7.54   1
   7 -12  -2  461.58   23.69   1
   7  12  -2  441.89   18.11   8
   7  12  -2  469.74   16.69   9
   7  12  -2  444.69   19.44  12
  -7  12   2  462.25   23.37   7
  -7  12   2  443.59   18.52  12
  -7  12   2  444.45   19.31  11
   6  12  -2    1.03  532.25   8
  -6  12   2    1.57    4.62  12
   6  12  -2   13.78    6.45   9
   6 -12  -2    6.03   10.26   1
   6  12  -2   12.89    9.47  12
  -6  12   2    8.42    5.89   3
  -6  12   2   34.42   11.22   7
  -6  12   2    8.20    9.95  11
   5  12  -2  119.17    6.82   3
  -5  12   2  131.08   11.22   7
   5 -12  -2  111.15   11.62   1
  -5  12   2  114.62    7.72  12
   5  12  -2  115.80    7.52   9
  -5  12   2  131.45   10.07   3
   5  12  -2  118.81    8.03   8
  -5  12   2  108.41   10.07  11
   5  12  -2  109.71    9.36  12
   4  12  -2   42.39    5.71   3
  -4  12   2   54.54    7.36  11
  -4  12   2   55.40    7.50   3
   4 -12  -2   28.67    8.57   1
  -4 -12   2   54.95    7.08   2
  -4  12   2   42.48    6.25  12
   4  12  -2   46.43    5.72   8
   4  12  -2   34.07    8.12  12
   4  12  -2   33.96    5.45   9
  -4  12   2   59.34    9.21   7
  -3 -12   2  138.97    8.21   2
  -3  12   2  140.32    8.89   3
   3  12  -2  141.85    6.72   9
  -3  12   2  127.65   10.40  11
  -3  12   2  115.20    5.43   8
   3  12  -2  141.15    7.41   8
  -3  12   2  141.91   10.12   7
  -3  12   2  142.81    8.27  12
   3  12  -2  145.24    8.91  12
   3  12  -2  132.82    7.89   3
  -2  12   2   58.33    8.76  11
   2  12  -2   71.59    7.39  12
   2  12  -2   71.38    4.74   9
  -2  12   2   54.52    3.96   8
  -2  12   2   69.25    7.85   7
   2 -12  -2   53.42    4.52  10
  -2  12   2   48.48    3.15   9
  -2  12   2   69.78    6.62  12
  -2  12   2   61.39    7.04   3
   2  12  -2   78.48    7.79  11
   2 -12  -2   67.85    4.21   5
   2 -12  -2   68.62    4.08   6
   2  12  -2   66.99    5.29   8
  -2 -12   2   72.12    6.78   2
   2  12  -2   78.34    6.25   3
   1  12  -2  750.14   27.45  11
  -1  12   2  703.76   32.61   7
   1 -12  -2  734.99   22.88  10
   1  12  -2  734.93   28.70  12
  -1 -12   2  754.70   24.53   2
  -1  12   2  698.87   25.31   8
   1  12  -2  743.24   26.26   3
   1 -12  -2  718.90   20.48   5
   1  12  -2  728.54   23.49   9
   1  12  -2  716.91   25.65   8
  -1  12   2  677.68   23.06   9
  -1  12   2  712.18   27.64  11
  -1  12   2  781.58   27.00   3
   1 -12  -2  743.78   20.92   6
   0  12   2   72.39    8.61  11
   0  12  -2   63.91    4.79   8
   0  12  -2   65.79    9.30  11
   0  12   2   71.24    4.00   9
   0  12  -2   77.06    4.50   9
   0  12   2   62.23    6.99   7
   0  12   2   64.32    4.90   8
   0  12  -2   58.54    7.72  12
   0 -12  -2   67.11    4.11   6
   0  12  -2   76.64    7.02   3
   0 -12  -2   61.48    3.41   5
   0  12   2   55.89    8.78   3
   0 -12  -2   77.68    5.04  10
  -1 -12  -2  973.95   27.23   6
  -1 -12  -2  978.01   30.23  10
   1  12   2  960.83   35.63  11
   1  12   2  967.99   30.72   9
  -1  12  -2  984.96   35.65  11
  -1  12  -2  961.02   33.30   8
  -1  12  -2  950.57   30.60   9
  -1  12  -2  997.01   37.37  12
  -1 -12  -2 1015.27   32.00   2
  -1 -12  -2  877.66   26.65   5
   1 -12   2  871.26   26.97   6
   1 -12   2  976.35   37.09   4
   1  12   2  942.43   42.35   7
   1  12   2 1023.46   34.80   3
   1  12   2  984.18   33.67   8
  -1  12  -2 1000.28   34.62   3
  -2  12  -2   11.36    5.45  11
   2  12   2   12.64    5.60   8
  -2 -12  -2    9.36    3.62  10
   2  12   2    6.24    3.95   3
  -2 -12  -2    6.32    5.12   6
  -2  12  -2   10.35    8.07   3
  -2 -12  -2    9.68    7.88   2
   2  12   2    4.27    3.58   9
   2 -12   2   11.86    2.32   4
  -2  12  -2    1.64    2.83  12
   3  12   2  264.73   11.68   3
  -3 -12  -2  250.67    8.07   6
  -3  12  -2  263.41   12.07   3
   3  12   2  254.56   11.02   8
  -3  12  -2  252.81   12.12  12
  -3  12  -2  250.13   12.68  11
  -3 -12  -2  260.65   11.60   2
  -3 -12  -2  256.73   10.16  10
   3  12   2  241.51    9.84   9
   4  12   2   17.65    6.83   3
  -4  12  -2   23.94    7.68  11
  -4  12  -2    5.39   13.24  12
   4  12   2   12.53    6.23   8
  -4 -12  -2   26.00    6.64   2
  -4 -12  -2   18.73    3.25   6
   4  12   2   22.76    5.85   9
  -4 -12  -2   30.87    5.87  10
  -5  12  -2    2.24    9.28  11
  -5 -12  -2    1.99    2.78   6
   5  12   2   11.40    5.14   9
   5  12   2    5.15    5.36   8
  -5  12  -2   -2.33    3.93  12
   6  12   2   39.69    6.07   9
  -6  12  -2   23.62    8.63  11
   6  12   2   32.17    7.15   3
  -6 -12  -2   42.07    4.19   6
   6  12   2   34.33    7.20   8
  -6 -12  -2   42.52    6.33  10
   6 -12   2   23.60   11.91   1
  -7  12  -2  247.17   13.74  11
   7 -12   2  231.03   16.69   1
  -7 -12  -2  263.53    8.76   6
   7  12   2  249.72   11.16   9
   7  12   2  261.95   12.33   3
  -7 -12  -2  254.73   10.84  10
   7  12   2  235.92   12.23   8
  -8 -12  -2    2.92    2.95  10
   8 -12   2    3.66   13.40   1
   8  12   2   11.73    7.17   8
   8  12   2    4.15   28.43   9
  -9  12  -2  281.72   15.35  11
   9  12   2  287.36   12.82   9
   9  12   2  285.79   13.91   8
   9 -12   2  285.88   19.29   1
  -9 -12  -2  286.21   12.34  10
  10  12   2   12.97    6.23  12
 -10 -12  -2    3.35    6.95  10
  10  12   2    2.68    4.42   9
  10 -12   2    7.54    9.96   1
  10  12   2    3.71    5.90   8
 -10  12  -2    2.41   25.65  11
 -11  12  -2   36.26   10.97  11
  11  12   2   40.65    8.31   8
  11 -12   2   43.94   14.41   1
  11  12   2   26.87    8.42   9
 -11 -12  -2   26.64    7.92  10
 -12 -12  -2   25.68    8.39  10
  12 -12   2   30.37   14.37   1
  12  12   2   30.08   10.71   8
 -12  12  -2   20.58    9.19  11
 -13 -12  -2    7.90    8.89  10
  13 -12   2   16.57   13.56   1
 -14  12  -2    6.61   11.23  11
  14 -12   2   37.87   15.17   1
  14  12   2   21.93    8.91   9
 -14 -12  -2    0.04    3.60  10
  15  12   2   17.32   13.17   8
  15  12   2    8.29    8.12   9
 -15  12  -2   31.46   12.43  11
 -15 -12  -2    2.83   15.75  10
 -16 -12  -2    0.08   16.68  10
 -16  12  -2    6.51    9.62  11
  16  12   2   11.46   10.71   9
 -17 -12  -2    0.44    6.88  10
 -17 -13   2   19.70   10.97  10
  16  13  -2   22.21   10.38   9
 -16 -13   2   18.73    8.94  10
 -16  13   2   14.55   13.80  11
  16  13  -2   13.82   15.01   8
 -15 -13   2   19.73    9.34  10
  15  13  -2   18.27    9.68   9
  15  13  -2    5.69    5.70   8
  14  13  -2   15.06    8.53   9
  14  13  -2    5.14    7.49   8
 -14 -13   2   15.78   10.04  10
 -14  13   2   14.38   11.48  11
 -13 -13   2   38.36    9.62  10
  13  13  -2    9.34   11.42   8
 -13  13   2   16.19   10.75  11
  13  13  -2   16.60    9.37   9
  12  13  -2    7.36    9.49   9
 -12  13   2    1.67    8.70  11
 -12 -13   2    6.19    6.50  10
  12 -13  -2   16.55   10.74   1
  11  13  -2   63.81    9.91   8
  11 -13  -2   83.86   13.81   1
  11  13  -2  103.61    9.45   9
 -11 -13   2   74.36    8.49  10
 -11  13   2   79.84   11.28  11
  10  13  -2   47.10    8.65   8
 -10  13   2   22.75    9.70  11
 -10 -13   2   36.15    7.67  10
  10  13  -2   44.83    8.11  12
  10  13  -2   31.32    8.97   9
 -10  13   2   45.09   12.84   7
  10 -13  -2   40.97   10.91   1
  -9  13   2  160.88   14.45   7
   9  13  -2  131.96    9.96   8
   9  13  -2  126.31   10.43  12
   9  13  -2  121.18    9.38   9
  -9  13   2  142.38   11.48  11
   9 -13  -2  154.54   14.04   1
   8  13  -2  222.61   11.40   8
  -8  13   2  237.43   15.28   7
  -8  13   2  184.13   10.49  12
   8  13  -2  203.18   11.80  12
   8  13  -2  215.45   10.66   9
  -8  13   2  201.55   12.96  11
   8 -13  -2  214.82   15.10   1
   7  13  -2    1.86   47.26   9
  -7  13   2    5.17    9.28  11
  -6  13   2  315.80   17.03   7
   6 -13  -2  308.45   16.97   1
  -6  13   2  264.80   13.09  12
   6  13  -2  273.54   14.27  12
   6  13  -2  260.57   12.58   8
   6  13  -2  299.76   11.82   9
  -6  13   2  297.21   14.21   3
  -6  13   2  263.97   13.98  11
  -5  13   2   12.94    5.95  12
  -5  13   2   30.49    9.55  11
   5  13  -2   21.81    8.85  12
  -5  13   2   43.58   11.43   7
   5 -13  -2   26.36   11.38   1
   5  13  -2   25.47    6.28   8
  -5  13   2   30.05    8.18   3
   5  13  -2   18.96    6.05   9
   4  13  -2  114.89    9.90  12
   4  13  -2  126.67    7.23   9
   4  13  -2  126.71    7.67   8
  -4 -13   2  119.07    8.98   2
   4  13  -2  123.86    7.66   3
  -4  13   2  113.99   11.18   7
  -4  13   2  145.13   10.26  11
  -4  13   2  142.50    9.76   3
  -4  13   2  116.57    8.60  12
   4 -13  -2  124.95   11.85   1
   3  13  -2  304.02   12.87   8
  -3  13   2  336.00   17.00   7
  -3 -13   2  316.85   13.28   2
   3 -13  -2  321.30   10.17   5
  -3  13   2  346.97   14.50   3
  -3  13   2  291.73   14.47  12
   3  13  -2  326.59   13.33   3
   3  13  -2  317.12   14.99  12
  -3  13   2  337.27   15.71  11
   3  13  -2  318.18   11.73   9
   2  13  -2  171.90   10.30  11
   2 -13  -2  159.85    6.11   6
   2  13  -2  165.28    7.92   8
  -2  13   2  166.80    9.84  12
  -2  13   2  172.22    9.67   3
  -2  13   2  144.88   10.86   7
   2  13  -2  163.19    8.38   3
   2  13  -2  158.32   10.28  12
   2  13  -2  165.71    7.17   9
  -2  13   2  130.23    6.66   8
   2 -13  -2  153.04    6.64  10
  -2 -13   2  161.03    9.22   2
  -2  13   2  149.35   11.27  11
   2 -13  -2  163.09    5.97   5
   1  13  -2   36.43    7.92  12
   1  13  -2   34.35    4.73   8
   1 -13  -2   25.63    4.14   6
  -1 -13   2   34.61    7.53   2
  -1  13   2   26.64    8.04  11
  -1  13   2   27.97    4.00   8
   1  13  -2   30.67    4.07   9
  -1  13   2   24.17    3.29   9
  -1  13   2   26.81    7.50   7
   1  13  -2   38.76    6.48  11
  -1  13   2   31.72    7.09   3
   1 -13  -2   28.12    3.30   5
  -1  13   2   39.80    7.16  12
   1  13  -2   34.16    6.32   3
   1 -13  -2   26.47    4.78  10
   0  13   2  307.14   14.15  11
   0  13  -2  283.60   11.38   8
   0 -13  -2  305.39   10.56  10
   0  13  -2  282.04   13.99  12
   0  13   2  306.65   13.30   3
   0  13   2  275.29   11.43   8
   0  13   2  280.19   10.11   9
   0 -13  -2  299.13    9.24   6
   0  13  -2  295.54   12.47   3
   0  13  -2  279.32   10.33   9
   0  13  -2  305.05   13.97  11
   1  13   2   23.37    4.28   9
  -1  13  -2   27.84    7.40   3
   1  13   2   16.52   11.05   3
   1 -13   2   28.66    3.42   4
  -1  13  -2   26.67    7.00  12
  -1 -13  -2   15.93   10.96   2
   1  13   2   24.11    5.15   8
  -1  13  -2   32.12    3.84   9
  -1 -13  -2   27.86    4.90  10
  -1 -13  -2   22.42    3.18   6
   1  13   2   25.26    7.35  11
  -1  13  -2   11.03   26.43  11
  -2 -13  -2  240.23   11.64   2
   2 -13   2  240.80   10.02   4
   2  13   2  249.43   10.70   8
  -2  13  -2  250.73   11.79   3
   2  13   2  255.11   11.60   3
  -2  13  -2  240.97   12.96  11
   2  13   2  230.66    9.34   9
  -2 -13  -2  236.51    7.75   6
  -2 -13  -2  246.05    9.75  10
  -2  13  -2  234.02   12.45  12
   3  13   2  282.63   11.96   3
  -3  13  -2  250.14   13.02  11
   3  13   2  263.45   11.54   8
   3  13   2  264.34   10.34   9
  -3  13  -2  259.85   12.99  12
  -3  13  -2  274.49   12.52   3
  -3 -13  -2  261.15   10.52  10
  -3 -13  -2  253.96   12.04   2
  -3 -13  -2  239.89    8.33   6
   4  13   2    7.31    5.37   9
  -4 -13  -2   11.64    8.33   2
   4  13   2   10.06   10.29   3
  -4  13  -2    5.98   11.49  11
  -4 -13  -2    4.53    3.41   6
   4  13   2   -0.79    1.90   8
   5  13   2  257.03   10.80   9
   5  13   2  260.95   12.20   3
  -5 -13  -2  259.10    8.51   6
  -5  13  -2  240.05   13.48  11
  -5 -13  -2  257.38   10.71  10
  -5  13  -2  245.84   12.27  12
   5  13   2  254.46   11.98   8
  -6 -13  -2   91.27    5.07   6
  -6  13  -2   71.18   10.17  11
   6  13   2   88.31    6.81   9
   6 -13   2   87.83   12.70   1
  -6 -13  -2  101.12    7.32  10
   6  13   2   90.15    8.23   8
   6  13   2   94.53    8.44   3
  -7 -13  -2   21.47    4.42   6
   7  13   2   20.47    6.83   9
  -7 -13  -2   12.25    6.98  10
   7  13   2   13.35   10.88   8
   7 -13   2   11.47   10.80   1
  -7  13  -2    2.71   38.69  11
   8  13   2   93.88    7.92   9
  -8 -13  -2   80.83    8.00  10
   8  13   2   79.54    9.18   8
  -8  13  -2   77.98   10.51  11
   8 -13   2   84.93   12.46   1
  -9 -13  -2   12.77    7.01  10
   9  13   2   32.86    7.12  12
   9  13   2   25.77    7.66   9
   9  13   2    8.85   10.45   8
  -9  13  -2   12.53   12.98  11
   9 -13   2    9.99   13.28   1
  10 -13   2   19.38   11.27   1
  10  13   2   39.10    9.78   8
  10  13   2   25.58    8.24  12
  10  13   2   17.52    7.23   9
 -10  13  -2   12.66   19.53  11
 -10 -13  -2   18.46    7.97  10
  11  13   2   71.38   10.52   8
  11  13   2   63.06    8.41   9
  11 -13   2   53.26   12.88   1
 -11 -13  -2   59.69    8.80  10
 -11  13  -2   20.14   13.62  11
  12  13   2   18.51    8.99   9
 -12 -13  -2   13.48    7.91  10
  12 -13   2   14.39   15.09   1
  13  13   2   29.89    9.85   9
 -13  13  -2   22.13   12.86  11
 -13 -13  -2   37.77    9.54  10
  13  13   2   32.48   10.50   8
  13 -13   2   33.52   16.33   1
  14  13   2    6.63   12.43   9
  14  13   2   -1.46   60.24   8
  14 -13   2   22.85   16.62   1
 -14 -13  -2   11.26   12.09  10
  15  13   2   28.80   11.73   8
 -15  13  -2    0.95    6.70  11
  15  13   2   11.40    9.24   9
 -15 -13  -2   22.73   10.80  10
 -16 -13  -2    1.26   25.46  10
 -16  13  -2   10.30   18.31  11
  16  13   2    7.79   11.96   8
  16  13   2    0.94    7.74   9
 -16  14   2   12.00   13.71  11
 -16 -14   2   14.33   11.04  10
  16  14  -2   10.88   14.14   8
  16  14  -2   16.33   11.11   9
 -15 -14   2   13.02   10.64  10
  15  14  -2   43.29   12.33   9
  15  14  -2   38.12   10.90   8
 -15  14   2   15.64   10.87  11
  14  14  -2   12.85    7.34   8
 -14  14   2   31.05   12.26  11
  14  14  -2   24.82    9.46   9
 -14 -14   2   21.39    8.78  10
 -13  14   2   24.74   11.24  11
  13  14  -2    2.35   34.13   9
  13  14  -2    8.66    8.90   8
 -13 -14   2   20.97    9.52  10
 -12 -14   2   77.25    9.28  10
  12  14  -2   57.64   10.17   8
 -12  14   2   75.67   12.48  11
  12  14  -2   63.23    9.93   9
  12 -14  -2   72.80   16.36   1
  11 -14  -2   34.42   12.37   1
  11  14  -2   10.81    8.91   8
 -11  14   2   14.42   11.81  11
  11  14  -2    6.15    7.06   9
 -11 -14   2   16.59    8.23  10
  10  14  -2  158.44   10.98   9
  10  14  -2  182.88   11.67  12
 -10  14   2  196.23   13.30  11
  10  14  -2  175.96   11.36   8
 -10 -14   2  168.84   10.38  10
  10 -14  -2  196.77   16.09   1
   9  14  -2   33.46    7.93   9
  -9  14   2   14.08    7.60  11
   9 -14  -2   46.69   11.34   1
   9  14  -2   20.21    8.69  12
   9  14  -2   33.08    7.95   8
  -9  14   2   85.30   14.79   7
  -8  14   2   30.42    6.58  12
   8  14  -2   35.73    7.74   8
  -8  14   2   38.78    9.72  11
   8 -14  -2   37.36   10.11   1
  -8  14   2   46.01   12.24   7
   8  14  -2   25.25    7.16  12
   8  14  -2   38.42    7.73   9
   7 -14  -2   16.39    9.49   1
  -7  14   2   32.14    7.19  11
  -7  14   2   11.42    6.28  12
   7  14  -2   12.99   12.23  12
   7  14  -2   12.82    6.17   9
   7  14  -2   25.80    5.70   8
  -6  14   2   44.67    9.59   7
  -6  14   2   40.24    6.70  12
  -6  14   2   46.22    9.13   3
   6  14  -2   46.25    6.33   9
   6 -14  -2   41.97   10.82   1
  -6  14   2   50.47    8.65  11
   6  14  -2   43.56    6.83   8
   6  14  -2   45.81    7.91  12
   5  14  -2   15.79    5.90   8
   5  14  -2   18.17   10.34  12
   5  14  -2   13.89    5.88   9
   5 -14  -2    9.21   10.01   1
  -5  14   2   11.34   10.27   3
  -5  14   2   45.79   13.21   7
  -5  14   2   14.52    5.83  11
  -4  14   2  417.39   16.87   3
   4  14  -2  402.55   17.85  12
  -4  14   2  398.49   19.95   7
   4  14  -2  374.81   14.05   9
   4  14  -2  368.10   15.44   8
  -4 -14   2  381.64   15.38   2
  -4  14   2  392.03   17.14  12
  -4  14   2  389.20   17.60  11
   4 -14  -2  388.93   20.59   1
   3 -14  -2    8.96    4.12   5
  -3  14   2   -0.03    8.47   7
   3  14  -2   -1.64    5.47  12
  -3 -14   2    9.09    6.34   2
   3 -14  -2   10.18    3.70   6
   3  14  -2    4.14    4.77   9
  -3  14   2    3.21    4.14   3
   3  14  -2   -1.23    4.59   8
   2  14  -2  481.66   18.40   3
   2 -14  -2  466.39   14.20   5
   2  14  -2  492.15   20.01  11
   2  14  -2  475.42   18.10   8
   2  14  -2  472.84   16.43   9
  -2  14   2  487.89   20.49  11
  -2 -14   2  488.68   18.00   2
  -2  14   2  474.46   20.30  12
   2  14  -2  492.20   20.90  12
  -2  14   2  514.12   19.39   3
  -1  14   2   21.38    7.35   3
  -1  14   2   15.80    8.12  11
   1  14  -2   24.60    7.07  11
  -1  14   2    4.18    3.26   8
   1  14  -2   13.65    4.50   9
   1  14  -2   15.28   10.40  12
   1 -14  -2   11.64    5.22  10
   1  14  -2   12.79    5.39   3
   1  14  -2    5.12    5.38   8
  -1 -14   2    4.50    5.57   2
  -1  14   2    4.56   16.74  12
   0  14  -2   42.25    7.32  12
   0  14   2   26.05    7.74   3
   0  14  -2   39.42    4.10   9
   0  14  -2   30.91    4.87   8
   0  14   2   38.67    7.65  12
   0 -14  -2   36.26    5.44  10
   0  14   2   31.93    4.72   8
   0  14  -2   19.31   16.23  11
   0  14   2   30.70    3.87   9
   0  14   2   37.01    9.67  11
   0  14  -2   40.89    7.62   3
   0 -14  -2   26.15   10.27   2
  -1  14  -2   39.49    7.50   3
   1  14   2   65.83    8.35  11
  -1  14  -2   38.63    4.12   9
   1  14   2   41.58    8.46   3
  -1 -14  -2   38.21    5.34  10
   1  14   2   35.52    4.05   9
   1  14   2   26.43    5.75   8
  -1  14  -2   20.51    7.66  12
   1  14   2   36.09    7.80  12
  -1 -14  -2   27.96    8.85   2
  -1  14  -2   39.81   10.08  11
   1 -14   2   34.16    3.63   4
   2 -14   2  280.33   11.77   4
  -2 -14  -2  298.89   13.23   2
  -2  14  -2  294.88   14.01  12
  -2 -14  -2  294.89   11.22  10
   2  14   2  313.52   13.35   3
   2  14   2  270.60   12.11   8
  -2  14  -2  294.27   14.82  11
   2  14   2  270.70   10.83   9
  -2  14  -2  324.25   13.50   3
   3  14   2   48.38    6.87   3
  -3  14  -2   39.37    7.33  12
  -3 -14  -2   41.96    8.41   2
  -3 -14  -2   41.56    6.44  10
   3  14   2   36.38    6.25   8
  -3  14  -2   30.86    8.33   3
  -3  14  -2   34.84    8.76  11
   3  14   2   43.02    5.55   9
   4  14   2  586.87   20.77   3
  -4  14  -2  523.66   21.83  11
   4  14   2  524.39   20.48   8
   4  14   2  542.97   18.65   9
  -4  14  -2  522.99   22.32  12
  -4 -14  -2  537.71   19.97   2
  -4 -14  -2  536.60   18.44  10
   5  14   2   58.20    6.60   9
  -5 -14  -2   57.69    6.54  10
   5  14   2   45.30    7.30   8
  -5  14  -2   46.92    8.74  11
   5  14   2   50.49    7.76   3
  -5  14  -2   42.59    6.90  12
   6  14   2  152.97    8.75   9
   6 -14   2  169.22   14.09   1
  -6  14  -2  159.84   11.51  11
   6  14   2  156.42    9.79   8
  -6 -14  -2  158.65    8.83  10
   7  14   2   15.50    6.43  12
  -7 -14  -2    8.42    6.59  10
   7 -14   2    2.21    6.77   1
   7  14   2   19.62    6.90   9
   7  14   2    6.85    9.14   8
  -7  14  -2   -2.02    5.14  11
   8 -14   2    4.63   10.87   1
  -8 -14  -2    8.88    7.67  10
   8  14   2   15.42    5.40   9
  -8  14  -2   11.95    8.55  11
   8  14   2    3.23    5.10   8
   8  14   2    3.31    5.18  12
   9 -14   2    2.47   44.10   1
  -9  14  -2    2.31   22.52  11
  -9 -14  -2   11.58    8.38  10
   9  14   2    8.15   14.98   9
   9  14   2   11.76    7.46  12
  10  14   2   23.22    8.46  12
  10 -14   2   21.14   14.44   1
  10  14   2   24.86    8.54   9
 -10  14  -2   11.34   18.29  11
 -11  14  -2    8.11   13.01  11
  11 -14   2   33.16   14.31   1
  11  14   2    9.87   10.89   8
 -11 -14  -2   19.08    7.40  10
  11  14   2    7.89    4.00   9
 -12  14  -2   11.05   19.37  11
  12 -14   2   33.52   14.58   1
 -12 -14  -2   29.00    9.94  10
  12  14   2   30.48    9.92   9
  12  14   2   15.13   12.10   8
  13  14   2   18.29    9.56   9
 -13  14  -2   21.28   17.67  11
  13  14   2    4.54    5.33   8
 -13 -14  -2   16.58    9.59  10
  13 -14   2   32.31   16.30   1
  14  14   2    1.65    6.15   8
 -14 -14  -2    4.30   11.82  10
  14 -14   2   29.81   17.25   1
  14  14   2   11.29    8.69   9
 -14  14  -2    2.38   21.37  11
 -15 -14  -2   13.17    9.92  10
  15  14   2   13.94    9.20   9
 -15  14  -2    2.58    9.09  11
  15  14   2   14.29   10.66   8
 -16 -14  -2    3.99    9.25  10
 -16 -15   2   23.61   10.86  10
 -15 -15   2   10.58   10.70  10
 -15  15   2    9.79   12.27  11
  15  15  -2   15.85   11.22   9
  15  15  -2   19.20   10.62   8
 -14  15   2   41.50   12.33  11
 -14 -15   2   24.24    9.61  10
  14  15  -2   21.80   11.33   9
  14  15  -2   27.72   10.49   8
 -13  15   2   69.04   13.31  11
 -13 -15   2   50.89    9.86  10
  13  15  -2   61.90   10.89   9
  13  15  -2   46.67   11.19   8
  12 -15  -2   28.10   14.75   1
 -12 -15   2   12.49    8.71  10
  12  15  -2   15.64    9.79   8
  12  15  -2    8.64   11.61   9
 -12  15   2    6.66    9.36  11
  11  15  -2   69.05   10.02   8
 -11 -15   2   65.83    9.50  10
  11 -15  -2   78.47   14.08   1
 -11  15   2   58.31   11.75  11
  11  15  -2   82.17   10.26   9
 -10  15   2   -2.10   11.63  11
  10  15  -2    3.10    5.21   9
 -10 -15   2    6.85    6.69  10
  10  15  -2    3.27   18.88  12
  10 -15  -2   23.09   13.84   1
  10  15  -2    5.73    8.72   8
   9  15  -2   21.52    9.29   9
  -9  15   2   19.50   11.41  11
   9  15  -2   19.29    7.46   8
  -9 -15   2   10.13   10.03  10
   9 -15  -2   16.77   12.53   1
   8  15  -2   96.80    8.80   9
   8 -15  -2   89.77   12.79   1
  -8  15   2  106.57   10.70  11
  -8  15   2   72.36    7.88  12
   8  15  -2   88.56    9.51  12
   8  15  -2   80.91    8.56   8
  -7  15   2   44.62   10.01  11
   7 -15  -2   31.44   11.63   1
   7  15  -2   30.61    7.85   9
  -7  15   2   23.41    7.33  12
   7  15  -2   22.69    9.27  12
   7  15  -2   28.88    7.01   8
  -6  15   2  161.11   11.21  11
  -6  15   2  160.09   11.36   3
   6  15  -2  129.77    8.43   9
   6  15  -2  135.65   10.82  12
   6 -15  -2  144.60   12.54   1
  -6  15   2  126.75    9.28  12
  -6  15   2  177.74   13.22   7
   6  15  -2  133.96    8.97   8
   5  15  -2   58.56    6.86   8
  -5  15   2   62.16    8.72  11
   5 -15  -2   72.88    9.86   1
   5  15  -2   53.44    6.33   9
  -5  15   2   80.37   11.92   7
   5  15  -2   51.09    9.37  12
  -5  15   2   57.11    7.47  12
  -5  15   2   67.74    9.07   3
   4 -15  -2   -2.68   11.75   1
  -4 -15   2   15.16    7.51   2
  -4  15   2    9.87   11.04   3
   4  15  -2   11.00    6.50   8
   4 -15  -2    5.17    5.89   5
  -4  15   2    6.97   14.14  11
  -4  15   2    2.38   24.69   7
   3  15  -2  172.66    8.03   9
  -3  15   2  177.30   10.61  12
  -3  15   2  195.23   12.20  11
  -3  15   2  183.69   10.47   3
   3  15  -2  168.91   11.07  12
  -3 -15   2  190.25   10.09   2
   3  15  -2  183.32    9.06   8
  -2  15   2   64.74    8.27   3
  -2  15   2   35.84    8.23  12
   2  15  -2   52.39    8.83  11
   2  15  -2   47.56    5.56   8
  -2  15   2   46.79    9.88  11
   2  15  -2   47.59    6.62   3
   2  15  -2   44.89    4.71   9
   2  15  -2   34.52    8.63  12
  -2 -15   2   47.62    7.97   2
  -1  15   2   64.62    8.13  12
   1  15  -2   56.67    6.81   3
   1 -15  -2   45.34    5.03  10
  -1  15   2   47.15    7.30   3
  -1 -15   2   48.55    7.55   2
   1  15  -2   41.06    8.30  12
   1  15  -2   48.30    4.76   9
   1  15  -2   47.08    5.27   8
  -1  15   2   43.55    4.80   8
  -1  15   2   62.95    9.61  11
   1  15  -2   58.00    8.61  11
   0  15  -2  294.16   12.39   3
   0  15   2  280.13   13.67  12
   0  15   2  304.03   13.12   3
   0  15  -2  256.34    9.84   9
   0 -15   2  287.93   12.43   2
   0  15  -2  279.13   13.66  11
   0  15  -2  252.04   11.02   8
   0 -15  -2  283.46   10.34  10
   0  15   2  277.16   13.92  11
   0  15  -2  267.39   13.65  12
   0 -15  -2  263.45   12.66   2
   0  15   2  241.55   10.92   8
  -1 -15  -2    0.88    9.69   2
  -1  15  -2    9.30    9.67  11
   1  15   2    1.74    5.36   8
   1 -15   2    2.87    4.67   4
   1  15   2   11.02    4.22   9
   1  15   2    4.05   15.80  12
   1  15   2    4.17   25.12   3
  -1 -15  -2    4.13    7.36  10
   1  15   2   11.17   12.25  11
  -1  15  -2    9.02    7.71   3
  -2 -15  -2   98.47    9.22   2
  -2 -15  -2   95.76    6.70  10
   2  15   2   93.00    8.95  12
  -2  15  -2   83.67    9.05  12
   2  15   2  103.02    5.86   9
   2 -15   2   91.00    4.67   4
  -2  15  -2  109.06   10.34  11
   2  15   2  110.75    7.10   8
   2  15   2  124.13    8.70   3
  -2  15  -2  113.92    8.28   3
  -3  15  -2   66.77   10.32  11
  -3  15  -2   55.55    7.87  12
  -3 -15  -2   63.38    6.65  10
  -3 -15  -2   72.36    8.06   2
   3  15   2   58.01    9.14  12
   3  15   2   73.74    7.45   3
   3  15   2   55.65    5.56   9
   3  15   2   63.88    6.53   8
   4  15   2   -0.66    5.46   8
   4  15   2    9.59    7.09   3
  -4 -15  -2   18.63    7.33   2
  -4  15  -2   10.00    4.23  11
   5  15   2  179.76    9.23   9
  -5  15  -2  175.12   10.42  12
   5  15   2  171.82   10.14   8
  -5 -15  -2  199.53    9.29  10
   5  15   2  191.97   11.85  12
  -5  15  -2  196.31   11.88  11
   6 -15   2   25.25   11.97   1
   6  15   2   23.14    6.81   8
   6  15   2   21.85    9.94  12
   6  15   2   22.78    6.37   9
  -6  15  -2   28.73    9.63  11
  -6 -15  -2   25.76    7.27  10
   7 -15   2   85.41   13.64   1
   7  15   2   77.10    8.75   8
  -7 -15  -2   61.08    7.72  10
  -7  15  -2   67.45   10.09  11
   7  15   2   79.99    9.50  12
   7  15   2   64.25    7.83   9
   8 -15   2   67.57   13.66   1
   8  15   2   53.44    8.81   8
  -8 -15  -2   63.18    8.22  10
   8  15   2   75.51    8.24   9
  -8  15  -2   69.57   10.56  11
   8  15   2   70.18    9.42  12
   9 -15   2   21.09   14.27   1
   9  15   2   20.84    7.91   9
  -9  15  -2    5.95    9.47  11
   9  15   2    2.72    8.27   8
  -9 -15  -2   21.98    8.01  10
   9  15   2   16.07    7.02  12
  10  15   2   33.05    8.04  12
  10  15   2   23.60    9.21   8
  10 -15   2   20.18   14.88   1
 -10 -15  -2    0.75   12.90  10
  10  15   2   26.59    8.93   9
 -11 -15  -2   22.38    8.51  10
  11  15   2   18.73    8.71   9
  11 -15   2   32.61   13.58   1
  11  15   2   20.34   12.18   8
 -11  15  -2    8.13   20.91  11
  12  15   2    3.19    9.73   8
  12 -15   2   22.94   15.15   1
 -12 -15  -2   14.95   10.47  10
  12  15   2   -2.56  250.01   9
 -13 -15  -2   41.44   10.32  10
 -13  15  -2   36.59   15.34  11
  13  15   2   36.73    9.59   9
  13  15   2   33.44   11.87   8
  13 -15   2   45.19   16.83   1
 -14  15  -2   14.66   12.33  11
  14  15   2   28.56    9.45   8
  14 -15   2   23.82   17.46   1
 -14 -15  -2    4.68   12.94  10
  14  15   2   24.72   13.19   9
 -15 -15  -2   21.64   11.29  10
  15  15   2   17.91   10.72   9
  15  15   2   19.71   11.30   8
 -15 -16   2   38.00   10.75  10
  15  16  -2   21.52   10.14   8
  15  16  -2   17.24   11.79   9
 -15  16   2    9.83   13.54  11
  14  16  -2   17.37   10.19   9
 -14 -16   2   32.65   10.77  10
  14  16  -2    1.15    5.83   8
 -14  16   2    7.95   11.68  11
 -13  16   2   27.53   12.67  11
  13  16  -2   20.94   11.19   8
 -13 -16   2   19.74   11.02  10
  13  16  -2    9.97   10.57   9
 -12  16   2   10.00   10.84  11
  12  16  -2   23.15    9.66   8
 -12 -16   2   11.28    9.27  10
  12 -16  -2   27.42   17.34   1
  12  16  -2   11.88    9.78   9
 -11  16   2    6.14    7.44  11
  11  16  -2    3.12   23.24   8
  11 -16  -2   30.70   12.97   1
  11  16  -2   12.29   10.94   9
 -11 -16   2   11.27   14.17  10
 -10 -16   2    7.99    6.18  10
  10  16  -2    9.14    9.19   8
 -10  16   2   11.57    9.42  11
  10  16  -2    4.16  174.09  12
  10 -16  -2   28.81   14.15   1
   9 -16  -2  132.95   14.31   1
   9  16  -2  115.43   10.19   8
  -9 -16   2  129.76    9.45  10
   9  16  -2  119.04    9.91   9
  -9  16   2  114.68   12.08  11
   9  16  -2  130.69   10.72  12
  -8  16   2    3.56    5.05  11
   8  16  -2   -1.96    4.85  12
  -8 -16   2    7.04    8.20  10
   8  16  -2   10.67    8.98   9
   8  16  -2   11.00    7.56   8
   7  16  -2  182.69   10.16   9
  -7  16   2  181.41   12.21  11
   7  16  -2  157.56   10.43   8
   7 -16  -2  184.92   14.74   1
  -7  16   2  194.16   14.19   7
  -7  16   2  178.96   10.63  12
   7  16  -2  175.28   12.21  12
  -6  16   2   24.03    8.34  11
   6  16  -2    6.80    7.48   9
   6  16  -2    5.26    8.14   8
   6 -16  -2    9.45    8.74   1
  -6  16   2    5.25   10.11  12
  -6  16   2    3.64   79.63   3
  -5  16   2   56.30    8.13  12
  -5  16   2   77.06   10.09   3
   5  16  -2   53.35    9.96  12
   5 -16  -2   60.32   10.22   1
   5  16  -2   65.65    7.80   8
   5  16  -2   70.49    6.56   9
  -5  16   2   54.48   11.41  11
  -4  16   2    2.63   20.53  12
  -4  16   2    7.09   15.24  11
   4  16  -2   13.62    6.53   8
  -4  16   2   26.81   10.16   3
   4  16  -2    8.07    5.26   9
   4 -16  -2    1.73   11.11   1
  -4 -16   2   19.36    7.41   2
   3  16  -2   -1.85    4.87   9
   3  16  -2   -2.28    3.80   8
  -3 -16   2    5.51    4.67   2
   3  16  -2    4.16    7.89  12
  -3  16   2   -0.23   68.04   3
   2  16  -2   37.95    4.79   9
  -2  16   2   39.54    7.38  12
   2  16  -2   32.90    5.82   8
  -2  16   2   38.93    9.48  11
  -2 -16   2   51.92    7.60   2
  -2  16   2   50.53    7.81   3
   2  16  -2   23.55    7.93  12
   1  16  -2  190.16   12.12  12
   1  16  -2  187.48    9.08   8
   1  16  -2  218.00   11.82  11
   1  16  -2  191.26    8.11   9
  -1  16   2  224.05   11.09   3
  -1 -16   2  190.41   10.81   2
  -1  16   2  187.10   12.38  11
  -1  16   2  198.08   11.65  12
   1  16  -2  200.99   10.21   3
   0  16   2    7.93   16.60  12
   0 -16  -2    3.18    6.70  10
   0  16  -2   21.01    7.05  11
   0  16   2    9.11    6.48  11
   0  16  -2    9.47    4.90   3
   0  16   2    6.62    4.13   8
   0 -16   2   -2.41    2.93   2
   0 -16  -2    4.72    6.59   2
   0  16   2    6.35    4.37   3
   0 -16   2    9.56    2.86   4
   1  16   2   89.98    6.55   8
   1  16   2   94.41    9.53  12
  -1 -16  -2  101.12    9.22   2
  -1  16  -2  106.10    9.84  11
   1 -16   2   97.90    4.74   4
   1  16   2  111.98   10.39  11
  -1  16  -2   98.25    9.44  12
  -1 -16  -2  111.18    6.60  10
   1  16   2  106.62    9.17   3
  -1  16  -2  118.04    8.46   3
  -2 -16  -2    8.12    6.16   2
   2  16   2    5.85    5.05   9
   2  16   2   -2.37    2.93   8
  -2  16  -2    1.53    3.51   3
  -2  16  -2   16.65    9.46  11
  -2 -16  -2   -0.84    5.62  10
   2  16   2    2.52    5.33   3
  -3  16  -2  105.29   10.18  11
   3  16   2   91.18    9.82  12
   3  16   2  105.14    8.66   3
  -3 -16  -2  102.14    9.38   2
   3  16   2   81.90    6.28   9
  -3 -16  -2   92.56    6.95  10
   3  16   2   91.88    7.61   8
  -3  16  -2   80.26    8.83  12
  -4  16  -2    5.98   10.90  12
   4  16   2    1.57    2.71  12
   4  16   2   12.85    8.12   8
  -4 -16  -2   13.00    6.20  10
   4  16   2    8.17    5.56   9
  -4 -16  -2   19.80    7.72   2
  -4  16  -2   14.89    7.44  11
   4  16   2   17.06    6.34   3
   5  16   2    0.18    3.20   9
  -5  16  -2   18.15    7.63  11
  -5 -16  -2   -0.07    0.21  10
   5  16   2   -0.22    1.50  12
   5  16   2    1.78   25.16   8
   6  16   2    8.09   12.58  12
  -6 -16  -2    9.28    7.76  10
  -6  16  -2    2.57    5.06  11
   6  16   2    3.52    5.15   9
   6  16   2   -2.01    3.00   8
   7  16   2   36.26    7.74   9
   7  16   2   26.71    9.50  12
   7 -16   2   34.23   13.96   1
   7  16   2   30.99    7.83   8
  -7  16  -2   49.46    9.61  11
  -7 -16  -2   40.83    7.63  10
  -8  16  -2   31.12   11.22  11
  -8 -16  -2   32.87    8.33  10
   8  16   2   14.70    8.37  12
   8  16   2   16.55    7.47   9
   8  16   2   14.73    9.22   8
   8 -16   2   22.24   13.61   1
  -9  16  -2   43.27   11.64  11
   9  16   2   46.92    9.11   9
   9  16   2   39.42   10.84   8
   9 -16   2   51.12   14.49   1
  -9 -16  -2   39.08    8.56  10
   9  16   2   44.22    9.58  12
 -10 -16  -2   31.22    8.99  10
  10 -16   2   41.33   15.17   1
  10  16   2   20.82    9.48   8
  10  16   2   36.87    8.92  12
 -10  16  -2   29.02   14.29  11
  10  16   2   40.70    8.54   9
 -11  16  -2    9.58   15.40  11
  11  16   2   15.12   10.42   9
  11 -16   2   22.21   15.23   1
  11  16   2    9.11   22.15   8
 -11 -16  -2   14.18    8.49  10
  12 -16   2   31.88   15.46   1
 -12 -16  -2    9.95   10.71  10
 -12  16  -2   17.32   12.86  11
  12  16   2   19.65   10.45   9
 -13 -16  -2   30.30   11.28  10
  13  16   2   22.45    9.77   8
  13  16   2   22.78   11.03   9
 -13  16  -2   14.90   10.08  11
  13 -16   2   34.24   15.98   1
 -14  16  -2   21.64   13.73  11
 -14 -16  -2   35.29   10.59  10
  14  16   2   14.46    8.67   8
  14  16   2   19.03   12.23   9
  14 -16   2   21.41   16.59   1
 -15 -16  -2   18.74   11.24  10
 -15 -17   2   15.52   10.82  10
  14  17  -2    3.47    9.54   9
 -14 -17   2   17.14   10.79  10
  14  17  -2   -0.86    5.65   8
 -14  17   2   32.69   12.67  11
  13  17  -2   10.90   11.91   9
 -13  17   2   35.62   12.88  11
 -13 -17   2   11.38   10.51  10
  13  17  -2   13.74   10.23   8
  12  17  -2    8.20    7.63   8
  12  17  -2   28.04   11.17   9
  12 -17  -2   36.24   17.79   1
 -12 -17   2   26.23   11.89  10
 -12  17   2   14.22   10.55  11
 -11 -17   2   14.87   10.24  10
 -11  17   2   40.98   12.13  11
  11 -17  -2   48.39   14.58   1
  11  17  -2   10.74   10.10   9
  11  17  -2   13.74    9.91   8
  10 -17  -2   42.92   14.64   1
  10  17  -2   19.22   11.71  12
  10  17  -2    6.74    9.61   9
 -10 -17   2   30.21    9.67  10
 -10  17   2   27.35   10.25  11
  10  17  -2   16.69    8.60   8
   9  17  -2   30.50    9.29   9
   9  17  -2   20.80    9.70   8
  -9 -17   2   26.95    9.03  10
  -9  17   2   32.68   11.59  11
   9  17  -2   22.43    8.87  12
   9 -17  -2   33.43   13.44   1
   8  17  -2   35.78    8.97  12
   8  17  -2   29.39    8.99   8
  -8 -17   2   37.89    7.59  10
  -8  17   2   40.01   10.65  11
   8  17  -2   32.24    8.10   9
   8 -17  -2   48.79   11.85   1
  -7  17   2   12.95   10.35  11
  -7  17   2   -2.07    6.40  12
   7  17  -2    5.47    5.96   9
  -7 -17   2   10.51    7.72  10
   7  17  -2    1.09    3.10   8
   7 -17  -2   23.42   11.13   1
   6  17  -2   57.99    7.02   9
  -6  17   2   58.50   11.10  11
   6 -17  -2   59.65   11.59   1
   6  17  -2   45.34   10.25  12
  -6  17   2   29.59    7.53  12
  -6  17   2   56.95    9.97   3
   6  17  -2   36.20    7.92   8
   5  17  -2   31.91    9.82  12
   5  17  -2   38.77    7.23   8
  -5  17   2   40.32    8.29  12
  -5  17   2   37.59   10.79  11
   5 -17  -2   46.16   10.67   1
  -5  17   2   63.77    9.63   3
   5  17  -2   45.88    6.46   9
   4  17  -2   -0.15    4.44   9
  -4  17   2    1.83    4.91  11
  -4  17   2    1.67  162.87   3
   4  17  -2    3.37    9.96  12
   4  17  -2    4.30    5.42   8
  -4 -17   2    8.76    6.96   2
  -3 -17   2   99.41    9.09   2
   3  17  -2   74.48    7.03   8
  -3  17   2   69.83    9.28  12
   3  17  -2   79.49    6.03   9
  -3  17   2   83.98    9.89   3
   3  17  -2   93.35    9.66  12
  -3  17   2  103.52   11.48  11
   3 -17  -2   81.02   10.44   1
   2  17  -2   16.58    5.79   8
  -2  17   2   23.82    9.47  12
   2  17  -2   34.48    4.73   9
   2  17  -2   23.66    9.73  12
  -2  17   2   40.27    9.10  11
  -2 -17   2   40.80    8.33   2
  -2  17   2   32.69    8.73   3
  -1  17   2   48.02   10.16  11
   1  17  -2   54.85    8.62  12
  -1  17   2   52.65    8.98  12
   1  17  -2   63.74    9.36  11
  -1  17   2   69.21    8.09   3
   1  17  -2   46.65    5.81   8
   1  17  -2   63.00    7.33   3
  -1 -17   2   58.69    8.18   2
   0 -17  -2  141.07   10.52   2
   0 -17   2  129.39    9.99   2
   0  17   2  127.77   10.82  12
   0  17   2  135.16   10.82  11
   0  17  -2  144.13   10.83  11
   0  17   2  129.19    9.66   3
   0  17  -2  116.14   10.20  12
   0  17  -2  144.33    9.35   3
  -1 -17  -2    3.91   12.29  10
   1  17   2    1.60    3.58  11
   1  17   2    8.72    5.77   3
  -1  17  -2    2.00    5.94   3
  -2  17  -2  113.37   11.01  11
  -2  17  -2  105.80    9.79  12
   2  17   2  109.14    9.15   3
  -2  17  -2  111.61    9.08   3
  -2 -17  -2   97.83    7.22  10
   2  17   2   89.15    7.37   8
   2  17   2  110.54   10.61  12
  -2 -17  -2  117.64    9.92   2
  -3 -17  -2   49.70    8.48   2
  -3  17  -2   49.08   11.46  11
  -3  17  -2   31.19    8.90  12
   3  17   2   37.70    8.80  12
  -3 -17  -2   37.08    6.76  10
   3  17   2   53.57    7.76   3
   3  17   2   43.47    6.97   8
  -4  17  -2    9.29    8.58  12
   4  17   2    1.88    8.49  12
  -4 -17  -2   25.68    8.51   2
  -4  17  -2    5.57   13.38  11
  -4 -17  -2    6.85   11.76  10
   4  17   2    7.95    6.86   8
   4  17   2    9.75    5.91   9
   5  17   2   23.82    6.49   9
  -5  17  -2   34.65    8.73  11
   5  17   2    8.11    8.82  12
  -5 -17  -2   13.92    8.01  10
   5  17   2   16.05    8.73   8
  -5  17  -2    5.97   12.41  12
   6  17   2    4.18    6.20   8
  -6 -17  -2    3.27    5.82  10
   6  17   2    4.42   23.55  12
  -6  17  -2   17.84    8.59  11
   6  17   2    3.97   11.98   9
  -7  17  -2   15.43    7.04  11
  -7 -17  -2   16.65    7.12  10
   7 -17   2   -2.50    7.75   1
   7  17   2   23.28    7.35   9
   7  17   2   -2.12    3.99   8
  -8 -17  -2   11.51    7.98  10
   8  17   2   -1.48    7.56   8
   8  17   2   19.35    8.48   9
   8 -17   2    1.86   32.94   1
   8  17   2    7.08    8.67  12
  -8  17  -2    9.82   10.16  11
   9 -17   2   50.51   14.47   1
   9  17   2   45.39    9.53  12
   9  17   2   35.79    9.09   9
  -9 -17  -2   51.81    8.85  10
   9  17   2   21.44    9.47   8
  -9  17  -2   66.56   12.00  11
 -10 -17  -2   44.46    8.92  10
  10  17   2   38.80   10.13   9
 -10  17  -2   38.82   12.41  11
  10  17   2   33.75    9.62   8
  10  17   2   27.51   10.91  12
  10 -17   2   36.62   15.45   1
  11  17   2   35.34    9.85   9
 -11  17  -2   28.96   13.68  11
 -11 -17  -2   48.49    9.73  10
  11 -17   2   46.48   15.44   1
  11  17   2   52.39   10.16   8
 -12  17  -2   24.42   14.52  11
  12  17   2   23.99   11.40   8
 -12 -17  -2   23.69   10.07  10
  12 -17   2   38.35   15.10   1
  12  17   2   29.14   12.24   9
  13  17   2    4.29    7.55   9
 -13  17  -2    8.17   15.14  11
 -13 -17  -2    9.95   10.56  10
  13 -17   2   27.13   16.05   1
  13  17   2    1.37    2.94   8
 -14 -17  -2   21.26   10.32  10
 -14  17  -2   29.50   14.03  11
  14  17   2   14.77   10.99   9
  14  17   2   29.25   13.31   8
  14 -17   2   18.08   17.25   1
 -14 -18   2   13.15   10.67  10
  14  18  -2    5.41   19.71   9
 -13  18   2   38.67   13.00  11
 -13 -18   2   37.76   10.69  10
  13  18  -2   27.24    9.69   8
  13  18  -2   21.27   12.03   9
 -12  18   2   36.77   12.34  11
  12  18  -2    3.94   11.80   9
  12  18  -2    1.27    2.77   8
  12 -18  -2   30.53   15.41   1
 -12 -18   2   14.33    8.96  10
  11  18  -2   38.63   10.56   8
  11  18  -2    6.33    9.24   9
  11 -18  -2   42.09   16.69   1
 -11 -18   2   27.34   10.42  10
 -11  18   2   40.74   11.25  11
 -10  18   2   27.99   11.78  11
  10  18  -2   19.71   11.04   8
  10 -18  -2   32.18   13.78   1
 -10 -18   2   38.82    9.25  10
  10  18  -2   12.17    9.95  12
  10  18  -2   12.97   10.27   9
   9  18  -2   -1.33   18.51   9
   9  18  -2    9.00   14.47   8
   9 -18  -2   24.31   11.66   1
  -9 -18   2   10.44    8.79  10
  -9  18   2   15.53   10.84  11
   9  18  -2   -1.62    6.14  12
   8  18  -2    6.67   39.72  12
  -8 -18   2   27.98    9.05  10
  -8  18   2   18.19   12.82  11
   8 -18  -2   32.86   11.02   1
   8  18  -2   34.49    9.08   9
   8  18  -2   22.63   10.77   8
   7  18  -2   16.39    6.70   9
  -7  18   2    7.89    9.82  12
  -7  18   2    3.75    6.12  11
   7  18  -2   15.57   10.63  12
  -7 -18   2   24.90    8.34  10
   7 -18  -2   12.53    9.29   1
   6  18  -2   18.57   11.41  12
   6 -18  -2   18.16   10.58   1
   6  18  -2   37.12    8.25   8
  -6  18   2   11.37   12.88  11
  -6  18   2    9.91    8.84  12
   6  18  -2   35.51    6.93   9
  -6 -18   2   37.16    8.21  10
  -5  18   2   12.79   12.74  11
   5  18  -2    6.00    6.84   8
   5  18  -2   16.42   10.15  12
   5 -18  -2   19.84   11.32   1
   5  18  -2   20.80    6.44   9
  -5  18   2    1.91   64.62  12
  -5  18   2   29.04   10.17   3
  -4  18   2  185.93   12.97  11
   4  18  -2  155.10    9.84   8
   4 -18  -2  169.74   13.56   1
  -4  18   2  149.52   10.76  12
  -4 -18   2  182.80   10.57   2
   4  18  -2  158.47   11.66  12
  -4  18   2  198.56   12.11   3
   4  18  -2  136.22    8.18   9
   3  18  -2    3.34    4.61   8
   3 -18  -2    4.44   27.36   1
  -3  18   2    1.46   15.52  12
  -3  18   2    7.40    5.14  11
  -3  18   2   16.20    9.52   3
  -3 -18   2   25.84    8.46   2
  -2  18   2  133.76   11.57  11
   2  18  -2  126.18   10.78  12
   2  18  -2  116.87    8.02   8
  -2 -18   2  159.44   10.41   2
  -2  18   2  154.32   10.69   3
  -2  18   2  121.41   10.47  12
   1  18  -2    4.70    3.97  11
   1 -18  -2    6.74   11.25   2
  -1  18   2    8.70   11.27  11
  -1  18   2   11.17    6.44   3
  -1 -18   2    9.20    6.09   2
   1  18  -2    0.86    4.67  12
   0  18   2   28.24    6.98   3
   0  18  -2   -1.52    5.70  12
   0 -18  -2   10.04   10.61   2
   0  18  -2   13.89    9.80  11
   0 -18   2    9.57   10.56   2
   0  18  -2   17.48    8.89   3
   0  18   2    3.94   13.93  12
   0  18   2   21.18    7.94  11
   1  18   2    1.35    2.01   3
   1  18   2   -0.20    3.39  12
   1 -18   2   -1.49   10.65   2
  -1  18  -2   19.58    8.42  11
  -1 -18  -2    1.81    4.19   2
  -1  18  -2   10.23    7.31   3
  -2  18  -2   39.75    9.82  11
  -2 -18  -2   22.38    9.28   2
  -2  18  -2   14.70    8.07  12
   2  18   2   16.83    9.10  12
  -2  18  -2   37.75    8.45   3
   2  18   2   22.91    5.82   8
  -2 -18  -2   15.73    7.25  10
   2  18   2   29.17    9.20   3
  -3  18  -2   17.41    8.85  12
   3  18   2   14.93    7.40   8
  -3  18  -2   37.05   11.26  11
  -3 -18  -2   24.43    6.51  10
   3  18   2   11.46    8.48  12
  -3 -18  -2   51.91    9.63   2
   4  18   2   90.01    8.38   8
   4  18   2   95.58   11.33  12
  -4  18  -2   88.62   11.67  11
  -4  18  -2   69.19    9.68  12
  -4 -18  -2   88.02    7.99  10
  -4 -18  -2   89.38    9.96   2
  -5  18  -2   14.27   14.84  11
   5  18   2   27.78    7.38   8
   5  18   2   34.90   10.48  12
   5  18   2   23.26    7.00   9
  -5  18  -2   12.56    8.79  12
   5 -18   2   14.33   10.37   1
  -5 -18  -2   21.63    7.19  10
   6 -18   2   12.36   11.33   1
   6  18   2   31.21    7.59   8
   6  18   2   43.21    7.55   9
   6  18   2   34.11    9.01  12
  -6 -18  -2   31.68    7.91  10
  -6  18  -2   42.71   10.57  11
  -7 -18  -2   46.32    8.51  10
   7  18   2   16.76    7.70   9
  -7  18  -2   46.18   10.53  11
   7  18   2   25.10    9.00   8
   7 -18   2   34.90   14.13   1
   7  18   2   31.10   11.28  12
  -8 -18  -2   17.92    9.11  10
   8  18   2   21.07   11.16  12
   8  18   2   20.77    9.62   8
   8 -18   2   16.53   13.98   1
  -8  18  -2   16.49    9.65  11
   8  18   2   28.70    7.74   9
   9 -18   2    9.86   15.48   1
   9  18   2   13.34   12.10   8
  -9 -18  -2   10.96    9.34  10
   9  18   2   17.70    9.42  12
  -9  18  -2   15.50    8.94  11
  10  18   2   23.78   10.26  12
  10  18   2   20.51   10.26   9
  10 -18   2   38.07   15.12   1
  10  18   2   20.21   10.07   8
 -10  18  -2   23.07   10.91  11
 -10 -18  -2   23.73   10.43  10
 -11  18  -2   32.68   13.68  11
  11  18   2   31.99   11.39   8
 -11 -18  -2   47.46   10.16  10
  11  18   2   22.64   10.76   9
  11 -18   2   40.77   16.86   1
 -12 -18  -2   18.81   10.08  10
  12  18   2    6.13    6.24   8
 -12  18  -2    5.85    8.59  11
  12 -18   2   25.92   16.84   1
  12  18   2    4.30    8.39   9
 -13  18  -2   27.80   15.04  11
  13  18   2   46.64   11.88   8
  13 -18   2   50.80   17.63   1
 -13 -18  -2   36.39   10.80  10
  13  18   2   25.10   11.74   9
 -14 -18  -2   -0.53    7.26  10
 -14 -19   2   15.98   12.92  10
 -13 -19   2   19.94   10.41  10
  13  19  -2   13.64   13.06   9
 -13  19   2   10.49   13.47  11
  13  19  -2   13.77    9.50   8
 -12  19   2   21.08   10.15  11
  12 -19  -2   36.05   16.47   1
  12  19  -2   28.33   11.97   9
 -12 -19   2   31.06   11.20  10
  12  19  -2   24.13   10.14   8
  11 -19  -2   10.35   14.20   1
 -11 -19   2   14.45   10.19  10
  11  19  -2    0.25    6.77   8
 -11  19   2   20.92   12.35  11
 -10 -19   2   16.29   10.53  10
  10 -19  -2   12.38   13.29   1
 -10  19   2   34.34   11.74  11
  10  19  -2    1.57   10.32   8
  10  19  -2    9.36   10.57   9
  10  19  -2   13.68   10.79  12
  -9 -19   2   30.00   10.37  10
   9 -19  -2   37.44   12.88   1
   9  19  -2   21.46    9.89   8
   9  19  -2   32.37    9.74   9
  -9  19   2   52.26   10.46  11
   9  19  -2   10.43   18.11  12
   8  19  -2    6.35    8.35  12
   8  19  -2   10.31   10.75   9
  -8  19   2    2.43    6.61  11
   8 -19  -2   27.98   11.79   1
  -8 -19   2    8.76   10.81  10
   7  19  -2   41.70    8.28   9
   7 -19  -2   29.01   14.43   1
  -7 -19   2   38.29    8.73  10
  -7  19   2   20.53    9.17  12
   7  19  -2   16.67   10.67  12
   7  19  -2   29.78    9.59   8
  -7  19   2    9.89   10.79  11
  -6 -19   2   13.02    9.17  10
   6  19  -2    6.09   14.90  12
   6  19  -2    5.72    8.55   8
   6 -19  -2   21.87   12.58   1
  -6  19   2   -1.57    8.59  11
  -6  19   2   15.92    8.24  12
   6  19  -2   15.82    6.98   9
   5  19  -2   33.74    6.78   9
  -5  19   2   22.35   12.51   3
   5  19  -2   30.03    9.54  12
  -5 -19   2   39.13    8.29  10
  -5  19   2   14.35    8.43  12
   5  19  -2   25.53    7.96   8
   5 -19  -2   35.82   10.74   1
  -5  19   2   12.06   24.13  11
  -4 -19   2   14.84    7.57  10
  -4 -19   2   26.80    8.74   2
   4  19  -2    7.39    7.04   8
   4 -19  -2    9.13    9.62   1
  -4  19   2   15.82   10.69  11
  -4  19   2   17.10   10.71   3
  -3  19   2   15.96    8.09  12
  -3  19   2   27.33   10.17   3
   3  19  -2    8.63   10.31  12
  -3  19   2   13.91   13.24  11
  -3 -19   2   38.00    8.66   2
  -3 -19   2   35.25    6.77  10
   3  19  -2   10.97    6.65   8
  -2 -19   2    9.42    8.42   2
  -2 -19   2    6.91    8.69  10
  -2  19   2   -0.74    3.42  12
  -2  19   2   -1.78 1733.67  11
  -2  19   2   16.79   10.60   3
  -1 -19   2   19.01    8.71   2
  -1  19   2    5.75   11.90   3
   1  19  -2   11.10    7.99  11
  -1  19   2    8.74    8.62  11
   0  19   2   37.29    9.61   3
   0 -19  -2   32.72    8.96   2
   0  19  -2   39.23    8.52  11
   0  19   2   23.58   10.19  12
   0  19  -2   29.85    9.12  12
   0  19   2   35.47   10.26  11
   0 -19   2   44.84    9.32   2
  -1 -19  -2    4.90    6.86   2
  -1  19  -2    5.68    5.79  11
   1  19   2    3.94   12.02  12
  -1  19  -2   10.57    7.24   3
   1  19   2    2.00   10.98   3
   1 -19   2   -2.25    5.33   2
  -2 -19  -2   22.85   10.07   2
  -2 -19  -2   15.59    6.47  10
  -2  19  -2    4.49   12.39  11
   2  19   2   14.73   11.25  12
  -2  19  -2    5.55   13.31  12
   3  19   2    3.28   12.91   8
  -3  19  -2   -0.64    2.24  12
  -3 -19  -2    1.64    8.64  10
  -3 -19  -2   14.89    8.96   2
   4  19   2    7.14    7.23   8
  -4 -19  -2    9.32   10.56   2
  -4 -19  -2    3.69    5.65  10
   5 -19   2   13.43   10.93   1
  -5  19  -2    6.67    8.46  12
   5  19   2   21.29    9.65  12
   5  19   2   13.15    7.62   8
  -5  19  -2    4.21   38.39  11
  -5 -19  -2   31.82    7.46  10
   6 -19   2   61.60   13.31   1
  -6 -19  -2   60.68    8.55  10
   6  19   2   55.52    8.76   8
  -6  19  -2   36.95   13.28  11
   6  19   2   57.92   11.40  12
   6  19   2   76.40    8.10   9
  -7 -19  -2   65.94    9.27  10
   7  19   2   61.82   10.32  12
   7  19   2   56.53    9.00   9
  -7  19  -2   73.16   12.25  11
   7 -19   2   46.98   13.69   1
   7  19   2   37.44    8.85   8
  -8 -19  -2   21.17    9.35  10
  -8  19  -2   27.57   11.99  11
   8  19   2    6.44   10.07   9
   8  19   2   10.61    7.82   8
   8  19   2   17.31    9.05  12
   8 -19   2   12.12   15.91   1
   9 -19   2   26.55   15.75   1
   9  19   2   25.22    9.92  12
  -9 -19  -2   38.49    9.94  10
   9  19   2   29.21    9.70   8
  -9  19  -2   39.60   11.39  11
   9  19   2   22.90    9.60   9
 -10  19  -2   24.67   12.79  11
  10  19   2    4.04    7.67   8
  10  19   2    8.99    8.35  12
 -10 -19  -2    1.94    7.65  10
  10 -19   2    4.61   10.88   1
  10  19   2    6.25   10.40   9
  11  19   2   16.85   11.11   8
 -11 -19  -2   17.82    9.25  10
  11  19   2   14.67   15.43   9
  11 -19   2   24.01   15.66   1
 -11  19  -2   22.54   12.76  11
  12 -19   2   33.49   17.03   1
 -12 -19  -2   13.41   10.06  10
  12  19   2   19.80    9.61   8
 -12  19  -2   31.11   13.49  11
  13 -19   2    3.59  460.86   1
  13  19   2   -1.79   35.16   9
 -13 -19  -2   14.95   12.62  10
  12 -20  -2   10.42   18.00   1
 -12 -20   2    4.88   19.95  10
 -12  20   2    7.34   20.63  11
  12  20  -2    8.48   13.26   8
  12  20  -2    4.99   14.83   9
 -11 -20   2   25.24   10.69  10
  11 -20  -2   25.84   16.59   1
  11  20  -2   13.04   12.23   8
  11  20  -2   17.12   11.13   9
 -11  20   2   20.13   12.64  11
 -10 -20   2    7.60   10.00  10
  10  20  -2   14.78    9.00   9
 -10  20   2   19.18   12.83  11
  10 -20  -2   18.06   14.11   1
   9 -20  -2   28.44   14.09   1
   9  20  -2   21.40   10.84   8
   9  20  -2   19.48    9.41   9
  -9 -20   2   10.66   10.57  10
   8  20  -2    6.36   16.43  12
  -8 -20   2   44.09    9.92  10
   8  20  -2   14.84    9.57   9
  -8  20   2    6.99   14.11  11
   8 -20  -2   34.84   12.44   1
   8  20  -2   -0.86   12.92   8
   7  20  -2   15.87    9.87   8
  -7 -20   2   20.10    9.27  10
   7  20  -2   15.06    7.41   9
  -7  20   2   13.18    9.76  12
   7 -20  -2   24.15   13.48   1
  -7  20   2   13.46   14.08  11
   7  20  -2   14.25   10.71  12
   6  20  -2    5.28   30.09  12
   6  20  -2    1.36   12.57   8
   6 -20  -2    2.29   10.86   1
  -6 -20   2    9.80    8.95  10
   5  20  -2   -1.47    5.54   8
  -5 -20   2    7.43   11.85  10
  -5  20   2    3.03   17.32  11
  -5  20   2    9.89    8.82   3
  -4  20   2   11.16   15.42  11
  -4 -20   2    9.18    6.05  10
  -4  20   2    1.60    9.70   3
  -4 -20   2   22.59    8.90   2
   4  20  -2   -2.21    9.29   8
  -3  20   2    2.03    9.51  11
  -3 -20   2   26.59    8.25  10
  -3 -20   2   29.09    9.70   2
  -3  20   2   16.71    8.12   3
   2 -20  -2   -1.41    3.33   2
  -2 -20   2   16.40    8.21   2
  -2  20   2   12.31    6.93   3
  -2  20   2   -2.21   12.52  11
  -1 -20   2   19.71    8.44   2
   1 -20  -2    8.28   14.10   2
   1  20  -2   12.41    8.63  11
  -1  20   2   10.64    9.17  12
   1  20  -2    8.82    8.91  12
  -1  20   2   18.95    8.88  11
  -1  20   2   17.90   10.99   3
   0  20  -2   31.11   10.09  11
   0  20   2    3.57    7.56  12
   0  20   2   12.96   15.68   3
   0 -20   2   15.60    9.54   2
   0 -20  -2   40.57   10.04   2
   0  20   2    7.61   22.71  11
  -1  20  -2   22.37   10.56  12
   1 -20   2   33.24    9.39   2
  -1 -20  -2   35.58   10.75   2
   1  20   2   30.41    8.51  12
  -1  20  -2   35.40    9.31  11
  -2 -20  -2   51.88   10.60   2
  -2  20  -2   25.03   10.69  11
  -2  20  -2    3.73   11.12  12
   2  20   2    1.76   35.57  12
  -3 -20  -2   13.98    7.74  10
  -3 -20  -2   17.37    9.49   2
  -3  20  -2    7.98   36.01  11
  -4 -20  -2    7.71    7.53  10
  -4  20  -2    3.54   10.61  12
  -4  20  -2   -1.72    3.42  11
  -4 -20  -2   22.30   11.12   2
   4  20   2    9.83   12.46  12
   4  20   2    3.36    6.66   8
   5  20   2    9.64    7.87  12
   5 -20   2    2.58   19.89   1
   5  20   2   12.90    9.10   8
  -5 -20  -2   20.17    8.53  10
   6  20   2   -2.27   50.15  12
   6 -20   2    0.43    6.24   1
  -6 -20  -2   15.45   10.38  10
  -7 -20  -2   18.09    8.61  10
   7 -20   2   22.09   15.82   1
   7  20   2    8.15    8.99  12
   7  20   2   11.61    9.34   8
  -8 -20  -2   31.58   10.21  10
   8  20   2   28.83   11.82  12
   8  20   2   23.95    9.54   9
  -8  20  -2   57.14   13.40  11
   8  20   2   14.33    9.61   8
   8 -20   2   51.24   15.30   1
   9  20   2   20.36   10.10   9
  -9 -20  -2   31.51    8.89  10
   9  20   2   15.22    9.00   8
   9 -20   2   36.77   15.66   1
   9  20   2   25.85   11.07  12
  -9  20  -2   35.83   11.35  11
 -10 -20  -2   31.46    8.77  10
  10  20   2   10.07   14.77  12
 -10  20  -2   24.27   10.27  11
  10  20   2   12.82   11.11   9
  10  20   2   22.68    9.04   8
  10 -20   2   25.22   16.34   1
 -11  20  -2   18.63   15.02  11
 -11 -20  -2   18.52   12.30  10
  11  20   2    7.39    9.37   8
  11 -20   2   26.87   15.80   1
  12  20   2    2.53   22.44   9
  12  20   2   27.25   12.43   8
  12 -20   2    3.68   27.77   1
 -12 -20  -2   20.32   13.22  10
  12 -21  -2    2.18    4.60   1
 -12 -21   2    8.61   14.94  10
  12  21  -2   14.05   12.16   9
  11 -21  -2   17.17   14.83   1
 -10 -21   2    5.91   12.48  10
  10  21  -2    7.10   11.40  12
 -10  21   2   21.61   13.93  11
  10  21  -2   11.69    7.84   8
  10 -21  -2   34.81   16.15   1
  10  21  -2   20.39   10.79   9
   9 -21  -2   34.80   13.85   1
  -9  21   2    2.28   17.16  11
   9  21  -2    4.78   26.37  12
   9  21  -2   22.49   10.21   8
  -9 -21   2   20.55   12.34  10
   9  21  -2   10.84   10.74   9
  -8 -21   2    3.10    7.62  10
   8  21  -2   -1.55   13.80   8
   7  21  -2    3.26    8.40   8
  -7  21   2   -1.83   14.05  12
  -7 -21   2   19.12    9.41  10
  -6 -21   2   14.92   10.59  10
  -6  21   2    3.15    7.04  11
  -5  21   2    4.32   30.44  11
  -5 -21   2    2.00    8.30  10
  -4  21   2   10.55    9.23  11
[truncated: 3,552,713 more chars]
