# Supplementary material
Source: MDPI journal article supplement (https://www.mdpi.com/2304-6740/7/2/13)
Supplement: s1 [file s1 › cif/complex6.cif]

 
data_c128s
 
_audit_creation_method            'SHELXL-2014/7'
_shelx_SHELXL_version_number      '2014/7'
_chemical_name_systematic         ?
_chemical_name_common             ?
_chemical_melting_point           ?
_chemical_formula_moiety          ?
_chemical_formula_sum
 'C20 H18 Ag F3 N O4 P S2' 
_chemical_formula_weight          596.31

loop_
 _atom_type_symbol
 _atom_type_description
 _atom_type_scat_dispersion_real
 _atom_type_scat_dispersion_imag
 _atom_type_scat_source
 'C'  'C'   0.0033   0.0016
 'International Tables Vol C Tables 4.2.6.8 and 6.1.1.4'
 'H'  'H'   0.0000   0.0000
 'International Tables Vol C Tables 4.2.6.8 and 6.1.1.4'
 'N'  'N'   0.0061   0.0033
 'International Tables Vol C Tables 4.2.6.8 and 6.1.1.4'
 'O'  'O'   0.0106   0.0060
 'International Tables Vol C Tables 4.2.6.8 and 6.1.1.4'
 'F'  'F'   0.0171   0.0103
 'International Tables Vol C Tables 4.2.6.8 and 6.1.1.4'
 'P'  'P'   0.1023   0.0942
 'International Tables Vol C Tables 4.2.6.8 and 6.1.1.4'
 'S'  'S'   0.1246   0.1234
 'International Tables Vol C Tables 4.2.6.8 and 6.1.1.4'
 'Ag'  'Ag'  -0.8971   1.1015
 'International Tables Vol C Tables 4.2.6.8 and 6.1.1.4'
 
_space_group_crystal_system       monoclinic
_space_group_IT_number            14
_space_group_name_H-M_alt         'P 21/n'
_space_group_name_Hall            '-P 2yn'
 
_shelx_space_group_comment
;
The symmetry employed for this shelxl refinement is uniquely defined
by the following loop, which should always be used as a source of
symmetry information in preference to the above space-group names.
They are only intended as comments.
;
 
loop_
 _space_group_symop_operation_xyz
 'x, y, z'
 '-x+1/2, y+1/2, -z+1/2'
 '-x, -y, -z'
 'x-1/2, -y-1/2, z-1/2'
 
_cell_length_a                    13.414(3)
_cell_length_b                    11.678(2)
_cell_length_c                    15.441(3)
_cell_angle_alpha                 90
_cell_angle_beta                  112.47(3)
_cell_angle_gamma                 90
_cell_volume                      2235.3(9)
_cell_formula_units_Z             4
_cell_measurement_temperature     100(2)
_cell_measurement_reflns_used     6382
_cell_measurement_theta_min       3.7117 
_cell_measurement_theta_max       32.1423 
 
_exptl_crystal_description        prism
_exptl_crystal_colour             colorless
_exptl_crystal_density_meas       ?
_exptl_crystal_density_method     ?
_exptl_crystal_density_diffrn     1.772          
_exptl_crystal_F_000              1192
_exptl_transmission_factor_min    ?
_exptl_transmission_factor_max    ?
_exptl_crystal_size_max           0.060
_exptl_crystal_size_mid           0.060
_exptl_crystal_size_min           0.040
_exptl_absorpt_coefficient_mu     1.213
_shelx_estimated_absorpt_T_min    0.931
_shelx_estimated_absorpt_T_max    0.953
_exptl_absorpt_correction_type    multi-scan 
_exptl_absorpt_correction_T_min   0.9308 
_exptl_absorpt_correction_T_max   0.9531 
_exptl_absorpt_process_details    SADABS 
_exptl_absorpt_special_details    
;
SADABS; Area-Detector Absorption Correction. Bruker-AXS
within SAINT+ package, v. 6.02 (1999).
;  
_diffrn_ambient_temperature       100(2)
_diffrn_radiation_wavelength      0.71073
_diffrn_radiation_type            MoK\a
_diffrn_source                    'fine-focus sealed tube'
_diffrn_measurement_device_type   'Xcalibur Oxford Diffraction'
_diffrn_measurement_method        '\w rotations'
_diffrn_detector_area_resol_mean  16.06
_diffrn_reflns_number             13437
_diffrn_reflns_av_unetI/netI      0.0644
_diffrn_reflns_av_R_equivalents   0.0689
_diffrn_reflns_limit_h_min        -15
_diffrn_reflns_limit_h_max        15
_diffrn_reflns_limit_k_min        -13
_diffrn_reflns_limit_k_max        11
_diffrn_reflns_limit_l_min        -18
_diffrn_reflns_limit_l_max        16
_diffrn_reflns_theta_min          3.722
_diffrn_reflns_theta_max          24.993
_diffrn_reflns_theta_full         24.993
_diffrn_measured_fraction_theta_max   0.994
_diffrn_measured_fraction_theta_full  0.994
_diffrn_reflns_Laue_measured_fraction_max    0.994
_diffrn_reflns_Laue_measured_fraction_full   0.994
_diffrn_reflns_point_group_measured_fraction_max   0.994
_diffrn_reflns_point_group_measured_fraction_full  0.994
_reflns_number_total              3902
_reflns_number_gt                 3008
_reflns_threshold_expression      'I > 2\s(I)'
_reflns_Friedel_coverage          0.000
_reflns_Friedel_fraction_max      .
_reflns_Friedel_fraction_full     .
 
_reflns_special_details
;
 Reflections were merged by SHELXL according to the crystal
 class for the calculation of statistics and refinement.
 
 _reflns_Friedel_fraction is defined as the number of unique
 Friedel pairs measured divided by the number that would be
 possible theoretically, ignoring centric projections and
 systematic absences.
;
 
_computing_data_collection        'Crysalis CCD' 
_computing_cell_refinement        'Crysalis RED' 
_computing_data_reduction         'Crysalis RED' 
_computing_structure_solution     'SHELXS-97 (Sheldrick, 1990)'
_computing_structure_refinement 'SHELXL-2014/7 (Sheldrick, 2014)'
_computing_molecular_graphics     XP
_computing_publication_material   XCIF
_refine_special_details           ?
_refine_ls_structure_factor_coef  Fsqd
_refine_ls_matrix_type            full
_refine_ls_weighting_scheme       calc
_refine_ls_weighting_details
'w=1/[\s^2^(Fo^2^)+(0.0810P)^2^] where P=(Fo^2^+2Fc^2^)/3'
_atom_sites_solution_primary      ?
_atom_sites_solution_secondary    ?
_atom_sites_solution_hydrogens    geom
_refine_ls_hydrogen_treatment     constr
_refine_ls_extinction_method      none
_refine_ls_extinction_coef        .
_refine_ls_number_reflns          3902
_refine_ls_number_parameters      289
_refine_ls_number_restraints      0
_refine_ls_R_factor_all           0.0800
_refine_ls_R_factor_gt            0.0552
_refine_ls_wR_factor_ref          0.1324
_refine_ls_wR_factor_gt           0.1197
_refine_ls_goodness_of_fit_ref    1.047
_refine_ls_restrained_S_all       1.047
_refine_ls_shift/su_max           0.000
_refine_ls_shift/su_mean          0.000
 
loop_
 _atom_site_label
 _atom_site_type_symbol
 _atom_site_fract_x
 _atom_site_fract_y
 _atom_site_fract_z
 _atom_site_U_iso_or_equiv
 _atom_site_adp_type
 _atom_site_occupancy
 _atom_site_site_symmetry_order  
 _atom_site_calc_flag
 _atom_site_refinement_flags_posn
 _atom_site_refinement_flags_adp
 _atom_site_refinement_flags_occupancy
 _atom_site_disorder_assembly
 _atom_site_disorder_group
Ag1 Ag 0.33607(3) 0.21475(3) 0.19795(3) 0.02191(17) Uani 1 1 d . . . . .
P1 P 0.24544(11) 0.15479(12) 0.03974(10) 0.0192(3) Uani 1 1 d . . . . .
C1 C 0.2803(4) 0.0087(4) 0.0178(4) 0.0200(12) Uani 1 1 d . . . . .
C2 C 0.3490(5) -0.0109(5) -0.0289(4) 0.0275(14) Uani 1 1 d . . . . .
H2 H 0.3720 0.0513 -0.0564 0.033 Uiso 1 1 calc R U . . .
C3 C 0.3843(5) -0.1221(5) -0.0357(4) 0.0306(14) Uani 1 1 d . . . . .
H3 H 0.4329 -0.1347 -0.0663 0.037 Uiso 1 1 calc R U . . .
C4 C 0.3490(5) -0.2138(5) 0.0017(5) 0.0335(15) Uani 1 1 d . . . . .
H4 H 0.3711 -0.2896 -0.0047 0.040 Uiso 1 1 calc R U . . .
C5 C 0.2807(5) -0.1937(5) 0.0489(5) 0.0342(16) Uani 1 1 d . . . . .
H5 H 0.2579 -0.2563 0.0761 0.041 Uiso 1 1 calc R U . . .
C6 C 0.2450(5) -0.0842(5) 0.0570(4) 0.0266(13) Uani 1 1 d . . . . .
H6 H 0.1975 -0.0720 0.0886 0.032 Uiso 1 1 calc R U . . .
C11 C 0.2595(4) 0.2388(4) -0.0554(4) 0.0203(12) Uani 1 1 d . . . . .
C12 C 0.3272(5) 0.3330(5) -0.0334(4) 0.0258(13) Uani 1 1 d . . . . .
H12 H 0.3684 0.3512 0.0303 0.031 Uiso 1 1 calc R U . . .
C13 C 0.3349(5) 0.4008(5) -0.1043(5) 0.0329(15) Uani 1 1 d . . . . .
H13 H 0.3810 0.4658 -0.0893 0.039 Uiso 1 1 calc R U . . .
C14 C 0.2745(5) 0.3735(6) -0.1982(5) 0.0375(16) Uani 1 1 d . . . . .
H14 H 0.2791 0.4198 -0.2471 0.045 Uiso 1 1 calc R U . . .
C15 C 0.2084(5) 0.2786(6) -0.2189(5) 0.0345(15) Uani 1 1 d . . . . .
H15 H 0.1677 0.2592 -0.2824 0.041 Uiso 1 1 calc R U . . .
C16 C 0.2006(5) 0.2117(5) -0.1483(4) 0.0289(14) Uani 1 1 d . . . . .
H16 H 0.1547 0.1465 -0.1635 0.035 Uiso 1 1 calc R U . . .
C17 C 0.0991(4) 0.1480(5) 0.0106(4) 0.0210(12) Uani 1 1 d . . . . .
H17A H 0.0618 0.1338 -0.0575 0.025 Uiso 1 1 calc R U . . .
H17B H 0.0834 0.0826 0.0442 0.025 Uiso 1 1 calc R U . . .
C18 C 0.0544(5) 0.2578(5) 0.0363(4) 0.0219(12) Uani 1 1 d . . . . .
H18A H -0.0240 0.2480 0.0202 0.026 Uiso 1 1 calc R U . . .
H18B H 0.0890 0.2694 0.1049 0.026 Uiso 1 1 calc R U . . .
N1 N 0.0713(4) 0.3605(4) -0.0109(3) 0.0202(10) Uani 1 1 d . . . . .
H1 H 0.1173 0.4130 0.0222 0.024 Uiso 1 1 calc R U . . .
C19 C 0.0183(4) 0.3765(4) -0.1033(4) 0.0224(13) Uani 1 1 d . . . . .
O1 O -0.0485(3) 0.3052(3) -0.1510(3) 0.0286(10) Uani 1 1 d . . . . .
C20 C 0.0462(4) 0.4803(5) -0.1446(4) 0.0233(13) Uani 1 1 d . . . . .
C21 C 0.1149(5) 0.5681(5) -0.1041(4) 0.0248(13) Uani 1 1 d . . . . .
H21 H 0.1562 0.5730 -0.0387 0.030 Uiso 1 1 calc R U . . .
C22 C 0.1185(5) 0.6517(5) -0.1694(4) 0.0302(14) Uani 1 1 d . . . . .
H22 H 0.1611 0.7192 -0.1525 0.036 Uiso 1 1 calc R U . . .
C23 C 0.0540(5) 0.6244(5) -0.2590(5) 0.0365(16) Uani 1 1 d . . . . .
H23 H 0.0468 0.6701 -0.3119 0.044 Uiso 1 1 calc R U . . .
S1 S -0.01208(15) 0.49833(15) -0.26478(12) 0.0441(5) Uani 1 1 d . . . . .
S2 S 0.32344(11) 0.50904(12) 0.21241(10) 0.0219(3) Uani 1 1 d . . . . .
O2 O 0.3303(3) 0.4038(3) 0.2638(3) 0.0289(10) Uani 1 1 d . . . . .
O3 O 0.2608(3) 0.5018(3) 0.1132(3) 0.0264(9) Uani 1 1 d . . . . .
O4 O 0.3073(3) 0.6112(3) 0.2579(3) 0.0311(10) Uani 1 1 d . . . . .
C24 C 0.4613(5) 0.5292(5) 0.2196(4) 0.0288(14) Uani 1 1 d . . . . .
F1 F 0.4682(3) 0.6197(3) 0.1693(3) 0.0408(10) Uani 1 1 d . . . . .
F2 F 0.5297(3) 0.5450(3) 0.3078(3) 0.0390(10) Uani 1 1 d . . . . .
F3 F 0.4958(3) 0.4371(3) 0.1863(3) 0.0358(9) Uani 1 1 d . . . . .
 
loop_
 _atom_site_aniso_label
 _atom_site_aniso_U_11
 _atom_site_aniso_U_22
 _atom_site_aniso_U_33
 _atom_site_aniso_U_23
 _atom_site_aniso_U_13
 _atom_site_aniso_U_12
Ag1 0.0181(2) 0.0249(2) 0.0182(3) -0.00131(17) 0.00191(17) -0.00161(17)
P1 0.0177(7) 0.0207(7) 0.0162(7) 0.0008(5) 0.0031(6) -0.0004(6)
C1 0.019(3) 0.022(3) 0.014(3) -0.002(2) 0.001(2) 0.000(2)
C2 0.025(3) 0.028(3) 0.026(3) -0.005(3) 0.006(3) -0.004(2)
C3 0.027(3) 0.041(4) 0.022(3) -0.009(3) 0.007(3) 0.000(3)
C4 0.029(3) 0.027(3) 0.032(4) -0.005(3) -0.002(3) 0.008(3)
C5 0.031(4) 0.025(3) 0.033(4) -0.003(3) -0.003(3) -0.001(3)
C6 0.020(3) 0.034(3) 0.021(3) -0.001(3) 0.004(2) -0.001(3)
C11 0.018(3) 0.021(3) 0.020(3) 0.000(2) 0.006(2) 0.002(2)
C12 0.027(3) 0.030(3) 0.022(3) -0.002(2) 0.011(3) -0.003(3)
C13 0.032(4) 0.033(3) 0.038(4) -0.002(3) 0.018(3) -0.005(3)
C14 0.034(4) 0.044(4) 0.045(4) 0.019(3) 0.026(3) 0.013(3)
C15 0.025(3) 0.049(4) 0.024(3) 0.005(3) 0.004(3) 0.005(3)
C16 0.026(3) 0.035(3) 0.023(3) 0.003(3) 0.006(3) -0.004(3)
C17 0.018(3) 0.025(3) 0.017(3) -0.002(2) 0.002(2) -0.002(2)
C18 0.017(3) 0.026(3) 0.020(3) 0.005(2) 0.005(2) -0.001(2)
N1 0.017(2) 0.025(2) 0.015(2) 0.0017(19) 0.0015(19) -0.0026(19)
C19 0.015(3) 0.017(3) 0.031(3) 0.000(2) 0.004(2) 0.003(2)
O1 0.023(2) 0.029(2) 0.022(2) 0.0035(17) -0.0050(17) -0.0039(18)
C20 0.019(3) 0.023(3) 0.024(3) 0.001(2) 0.004(2) 0.000(2)
C21 0.026(3) 0.032(3) 0.013(3) 0.003(2) 0.004(2) 0.005(2)
C22 0.028(3) 0.028(3) 0.030(4) 0.001(3) 0.006(3) -0.003(3)
C23 0.038(4) 0.024(3) 0.037(4) 0.008(3) 0.003(3) -0.003(3)
S1 0.0483(11) 0.0371(9) 0.0268(9) 0.0076(7) -0.0081(8) -0.0164(8)
S2 0.0206(7) 0.0229(7) 0.0204(8) -0.0030(5) 0.0057(6) 0.0003(5)
O2 0.043(3) 0.028(2) 0.021(2) -0.0001(17) 0.0176(19) 0.0017(19)
O3 0.023(2) 0.032(2) 0.021(2) -0.0046(17) 0.0036(17) -0.0022(17)
O4 0.029(2) 0.029(2) 0.033(3) -0.0088(18) 0.0090(19) 0.0045(18)
C24 0.025(3) 0.026(3) 0.032(4) -0.005(3) 0.007(3) 0.002(2)
F1 0.031(2) 0.033(2) 0.058(3) 0.0169(18) 0.0167(19) 0.0001(16)
F2 0.0221(19) 0.046(2) 0.037(2) -0.0102(17) -0.0029(16) 0.0025(16)
F3 0.0257(19) 0.038(2) 0.045(2) -0.0024(17) 0.0149(17) 0.0068(16)
 
_geom_special_details
;
 All esds (except the esd in the dihedral angle between two l.s. planes)
 are estimated using the full covariance matrix.  The cell esds are taken
 into account individually in the estimation of esds in distances, angles
 and torsion angles; correlations between esds in cell parameters are only
 used when they are defined by crystal symmetry.  An approximate (isotropic)
 treatment of cell esds is used for estimating esds involving l.s. planes.
;
 
loop_
 _geom_bond_atom_site_label_1
 _geom_bond_atom_site_label_2
 _geom_bond_distance
 _geom_bond_site_symmetry_2
 _geom_bond_publ_flag
Ag1 O1 2.265(4) 4_666 ?
Ag1 P1 2.3804(16) . ?
Ag1 O2 2.444(4) . ?
Ag1 O4 2.574(4) 2_545 ?
P1 C1 1.834(5) . ?
P1 C11 1.835(6) . ?
P1 C17 1.840(6) . ?
C1 C2 1.389(8) . ?
C1 C6 1.410(8) . ?
C2 C3 1.400(8) . ?
C3 C4 1.385(9) . ?
C4 C5 1.391(10) . ?
C5 C6 1.387(9) . ?
C11 C12 1.383(8) . ?
C11 C16 1.385(8) . ?
C12 C13 1.388(9) . ?
C13 C14 1.400(9) . ?
C14 C15 1.379(9) . ?
C15 C16 1.376(9) . ?
C17 C18 1.532(8) . ?
C18 N1 1.465(7) . ?
N1 C19 1.342(7) . ?
C19 O1 1.239(6) . ?
C19 C20 1.483(8) . ?
O1 Ag1 2.265(4) 4_565 ?
C20 C21 1.361(8) . ?
C20 S1 1.729(6) . ?
C21 C22 1.417(8) . ?
C22 C23 1.359(9) . ?
C23 S1 1.704(6) . ?
S2 O3 1.442(4) . ?
S2 O4 1.442(4) . ?
S2 O2 1.447(4) . ?
S2 C24 1.824(6) . ?
O4 Ag1 2.574(4) 2 ?
C24 F2 1.332(7) . ?
C24 F1 1.336(7) . ?
C24 F3 1.348(7) . ?
 
loop_
 _geom_angle_atom_site_label_1
 _geom_angle_atom_site_label_2
 _geom_angle_atom_site_label_3
 _geom_angle
 _geom_angle_site_symmetry_1
 _geom_angle_site_symmetry_3
 _geom_angle_publ_flag
O1 Ag1 P1 155.02(11) 4_666 . ?
O1 Ag1 O2 77.44(14) 4_666 . ?
P1 Ag1 O2 127.41(10) . . ?
O1 Ag1 O4 87.99(15) 4_666 2_545 ?
P1 Ag1 O4 89.63(10) . 2_545 ?
O2 Ag1 O4 99.70(14) . 2_545 ?
C1 P1 C11 103.8(3) . . ?
C1 P1 C17 103.8(2) . . ?
C11 P1 C17 104.7(3) . . ?
C1 P1 Ag1 113.36(18) . . ?
C11 P1 Ag1 119.71(18) . . ?
C17 P1 Ag1 110.04(19) . . ?
C2 C1 C6 119.6(5) . . ?
C2 C1 P1 121.1(4) . . ?
C6 C1 P1 119.0(5) . . ?
C1 C2 C3 120.2(6) . . ?
C4 C3 C2 120.4(6) . . ?
C3 C4 C5 119.1(6) . . ?
C6 C5 C4 121.5(6) . . ?
C5 C6 C1 119.1(6) . . ?
C12 C11 C16 119.8(5) . . ?
C12 C11 P1 119.2(4) . . ?
C16 C11 P1 121.0(4) . . ?
C11 C12 C13 120.0(5) . . ?
C12 C13 C14 119.9(6) . . ?
C15 C14 C13 119.3(6) . . ?
C16 C15 C14 120.6(6) . . ?
C15 C16 C11 120.3(6) . . ?
C18 C17 P1 112.8(4) . . ?
N1 C18 C17 114.0(5) . . ?
C19 N1 C18 121.4(4) . . ?
O1 C19 N1 120.6(5) . . ?
O1 C19 C20 122.5(5) . . ?
N1 C19 C20 116.9(5) . . ?
C19 O1 Ag1 137.4(4) . 4_565 ?
C21 C20 C19 131.0(5) . . ?
C21 C20 S1 110.5(4) . . ?
C19 C20 S1 118.5(4) . . ?
C20 C21 C22 113.1(5) . . ?
C23 C22 C21 112.4(5) . . ?
C22 C23 S1 111.8(5) . . ?
C23 S1 C20 92.1(3) . . ?
O3 S2 O4 115.5(2) . . ?
O3 S2 O2 114.9(2) . . ?
O4 S2 O2 115.2(3) . . ?
O3 S2 C24 103.8(3) . . ?
O4 S2 C24 101.6(3) . . ?
O2 S2 C24 103.0(3) . . ?
S2 O2 Ag1 123.0(2) . . ?
S2 O4 Ag1 141.6(3) . 2 ?
F2 C24 F1 108.1(5) . . ?
F2 C24 F3 107.3(5) . . ?
F1 C24 F3 107.3(5) . . ?
F2 C24 S2 111.6(5) . . ?
F1 C24 S2 111.2(4) . . ?
F3 C24 S2 111.2(4) . . ?
 
_refine_diff_density_max    1.811
_refine_diff_density_min   -1.361
_refine_diff_density_rms    0.145

_shelx_res_file
;

    c128s.res created by SHELXL-2014/7


TITL c128s in P2(1)/n
CELL 0.71073  13.4144  11.6777  15.4415  90.000 112.468  90.000
ZERR    4.00   0.0027   0.0023   0.0031   0.000   0.030   0.000
LATT 1
SYMM 0.5-X, 0.5+Y, 0.5-Z
SFAC C  H  N  O  F  P  S  Ag
UNIT 80 72 4 16 12 4 8 4
LIST 4 ! automatically inserted. Change 6 to 4 for CHECKCIF!!
OMIT -1 2 1
OMIT 1 2 0
OMIT -10 8 6
OMIT  -2.00  50.00
L.S. 10
HTAB
ACTA
BOND
FMAP 2
PLAN 10
SIZE 0.06 0.06 0.04
TEMP -173
WGHT    0.081000
FVAR       0.33010
AG1   8    0.336066    0.214746    0.197954    11.00000    0.01806    0.02494 =
         0.01821   -0.00131    0.00191   -0.00161
P1    6    0.245436    0.154794    0.039743    11.00000    0.01767    0.02070 =
         0.01618    0.00081    0.00308   -0.00041
C1    1    0.280346    0.008725    0.017834    11.00000    0.01921    0.02213 =
         0.01384   -0.00168    0.00087    0.00005
C2    1    0.348960   -0.010906   -0.028942    11.00000    0.02516    0.02819 =
         0.02552   -0.00528    0.00577   -0.00438
AFIX  43
H2    2    0.371963    0.051296   -0.056394    11.00000   -1.20000
AFIX   0
C3    1    0.384306   -0.122084   -0.035744    11.00000    0.02727    0.04069 =
         0.02188   -0.00945    0.00723    0.00049
AFIX  43
H3    2    0.432856   -0.134659   -0.066268    11.00000   -1.20000
AFIX   0
C4    1    0.348979   -0.213844    0.001718    11.00000    0.02903    0.02690 =
         0.03224   -0.00499   -0.00220    0.00819
AFIX  43
H4    2    0.371087   -0.289582   -0.004702    11.00000   -1.20000
AFIX   0
C5    1    0.280668   -0.193668    0.048895    11.00000    0.03138    0.02465 =
         0.03312   -0.00255   -0.00286   -0.00052
AFIX  43
H5    2    0.257922   -0.256261    0.076141    11.00000   -1.20000
AFIX   0
C6    1    0.245033   -0.084193    0.057034    11.00000    0.02043    0.03448 =
         0.02113   -0.00103    0.00357   -0.00068
AFIX  43
H6    2    0.197475   -0.072006    0.088599    11.00000   -1.20000
AFIX   0
C11   1    0.259495    0.238833   -0.055354    11.00000    0.01802    0.02131 =
         0.02034    0.00012    0.00583    0.00154
C12   1    0.327157    0.332982   -0.033382    11.00000    0.02703    0.03039 =
         0.02154   -0.00245    0.01106   -0.00323
AFIX  43
H12   2    0.368373    0.351212    0.030304    11.00000   -1.20000
AFIX   0
C13   1    0.334861    0.400838   -0.104342    11.00000    0.03219    0.03273 =
         0.03782   -0.00225    0.01789   -0.00476
AFIX  43
H13   2    0.381011    0.465784   -0.089271    11.00000   -1.20000
AFIX   0
C14   1    0.274528    0.373460   -0.198174    11.00000    0.03367    0.04406 =
         0.04473    0.01861    0.02619    0.01310
AFIX  43
H14   2    0.279133    0.419799   -0.247076    11.00000   -1.20000
AFIX   0
C15   1    0.208374    0.278583   -0.218887    11.00000    0.02528    0.04927 =
         0.02444    0.00502    0.00435    0.00504
AFIX  43
H15   2    0.167747    0.259212   -0.282442    11.00000   -1.20000
AFIX   0
C16   1    0.200638    0.211656   -0.148341    11.00000    0.02644    0.03488 =
         0.02259    0.00299    0.00609   -0.00427
AFIX  43
H16   2    0.154722    0.146522   -0.163487    11.00000   -1.20000
AFIX   0
C17   1    0.099124    0.147951    0.010578    11.00000    0.01756    0.02475 =
         0.01701   -0.00240    0.00240   -0.00237
AFIX  23
H17A  2    0.061831    0.133762   -0.057472    11.00000   -1.20000
H17B  2    0.083416    0.082636    0.044242    11.00000   -1.20000
AFIX   0
C18   1    0.054357    0.257838    0.036286    11.00000    0.01732    0.02591 =
         0.02048    0.00544    0.00512   -0.00076
AFIX  23
H18A  2   -0.024004    0.248024    0.020173    11.00000   -1.20000
H18B  2    0.088956    0.269399    0.104892    11.00000   -1.20000
AFIX   0
N1    3    0.071338    0.360549   -0.010851    11.00000    0.01686    0.02487 =
         0.01468    0.00170    0.00147   -0.00262
AFIX  43
H1    2    0.117314    0.412951    0.022162    11.00000   -1.20000
AFIX   0
C19   1    0.018309    0.376457   -0.103269    11.00000    0.01494    0.01737 =
         0.03075    0.00022    0.00417    0.00269
O1    4   -0.048482    0.305189   -0.151023    11.00000    0.02291    0.02910 =
         0.02157    0.00350   -0.00499   -0.00388
C20   1    0.046193    0.480261   -0.144639    11.00000    0.01862    0.02326 =
         0.02384    0.00072    0.00355    0.00040
C21   1    0.114882    0.568146   -0.104077    11.00000    0.02585    0.03235 =
         0.01287    0.00335    0.00363    0.00538
AFIX  43
H21   2    0.156196    0.572973   -0.038672    11.00000   -1.20000
AFIX   0
C22   1    0.118450    0.651681   -0.169388    11.00000    0.02796    0.02819 =
         0.02957    0.00064    0.00571   -0.00284
AFIX  43
H22   2    0.161083    0.719184   -0.152462    11.00000   -1.20000
AFIX   0
C23   1    0.054040    0.624417   -0.258978    11.00000    0.03814    0.02419 =
         0.03679    0.00805    0.00286   -0.00335
AFIX  43
H23   2    0.046781    0.670144   -0.311936    11.00000   -1.20000
AFIX   0
S1    7   -0.012082    0.498325   -0.264783    11.00000    0.04834    0.03712 =
         0.02677    0.00763   -0.00807   -0.01636
S2    7    0.323439    0.509044    0.212414    11.00000    0.02059    0.02294 =
         0.02042   -0.00301    0.00572    0.00026
O2    4    0.330301    0.403775    0.263772    11.00000    0.04266    0.02762 =
         0.02116   -0.00005    0.01756    0.00168
O3    4    0.260766    0.501762    0.113157    11.00000    0.02290    0.03160 =
         0.02052   -0.00457    0.00361   -0.00216
O4    4    0.307264    0.611239    0.257871    11.00000    0.02898    0.02888 =
         0.03299   -0.00877    0.00897    0.00447
C24   1    0.461261    0.529168    0.219643    11.00000    0.02508    0.02583 =
         0.03168   -0.00530    0.00653    0.00184
F1    5    0.468248    0.619682    0.169318    11.00000    0.03082    0.03342 =
         0.05803    0.01691    0.01666    0.00010
F2    5    0.529735    0.544963    0.307757    11.00000    0.02215    0.04554 =
         0.03664   -0.01019   -0.00290    0.00253
F3    5    0.495843    0.437107    0.186330    11.00000    0.02566    0.03754 =
         0.04540   -0.00244    0.01487    0.00683

HKLF 4

REM  c128s in P2(1)/n
REM R1 =  0.0552 for    3008 Fo > 4sig(Fo)  and  0.0800 for all    3902 data
REM    289 parameters refined using      0 restraints

END

WGHT      0.0811      0.0000

REM Instructions for potential hydrogen bonds
EQIV $1 -x+1/2, y-1/2, -z+1/2
HTAB C6 O2_$1
HTAB C12 F3
HTAB C17 O1
HTAB N1 O3
HTAB C21 O3

REM Highest difference peak  1.811,  deepest hole -1.361,  1-sigma level  0.145
Q1    1   0.3571  0.2162  0.1416  11.00000  0.05    1.81
Q2    1   0.3139  0.2188  0.2539  11.00000  0.05    1.64
Q3    1   0.2853  0.1537  0.1730  11.00000  0.05    1.29
Q4    1  -0.0600  0.5238 -0.2364  11.00000  0.05    1.28
Q5    1   0.3829  0.1550  0.2258  11.00000  0.05    1.23
Q6    1   0.2831  0.2810  0.1717  11.00000  0.05    1.22
Q7    1   0.3874  0.2756  0.2231  11.00000  0.05    1.20
Q8    1   0.2205  0.1540  0.0931  11.00000  0.05    0.65
Q9    1   0.2597  0.1785 -0.0108  11.00000  0.05    0.60
Q10   1   0.3640  0.5087  0.1603  11.00000  0.05    0.58
;
_shelx_res_checksum   95611

_shelx_hkl_file
;
  -3   0   0   -0.10    3.72   1
  -4   0   0  718.42   35.06   1
  -5   0   0   -3.23    6.00   1
  -6   0   0 2698.72  128.85   1
  -7   0   0   -1.41   17.05   1
  -8   0   0   22.99   12.51   1
  -8   0   0    6.16   28.61   2
  -9   0   0   -1.34    6.38   2
  -9   0   0    2.38    7.09   1
 -10   0   0  741.19   46.73   2
 -10   0   0  775.00   38.69   1
 -11   0   0   19.38   19.44   2
 -12   0   0  828.51   41.65   1
  12   0   0  795.29   67.98   3
 -13   0   0    3.89    9.61   1
 -14   0   0  301.93   19.96   1
 -15   0   0    8.75   12.65   1
 -16   0   0   20.57   14.14   1
 -17   0   0    8.36   16.63   1
 -18   0   0   54.00   15.54   1
   2  -1   0 1590.30  116.85   3
  -2   1   0 1539.70   74.44   1
  -3   1   0  297.00   14.63   1
   3  -1   0  287.83   22.76   3
  -3  -1   0  224.60   17.53   2
  -3  -1   0  369.53   21.43   4
  -3  -1   0  262.06   15.42   1
  -4  -1   0 1992.88   98.64   4
   4  -1   0 1789.13  133.68   3
  -4  -1   0 1682.97   85.60   1
  -4   1   0 1702.24   85.36   1
   5  -1   0  876.01   60.42   3
  -5  -1   0  707.41   44.65   2
  -5  -1   0  831.24   38.98   1
  -5   1   0  763.03   38.52   1
  -6  -1   0  162.67   13.26   1
   6  -1   0  238.65   20.19   3
  -6   1   0  181.08   12.26   1
  -6  -1   0  186.78   15.52   2
  -7   1   0   61.71    9.28   1
  -7  -1   0   66.79   12.53   2
  -7  -1   0   54.12   10.76   1
  -8  -1   0 1399.86   80.17   2
   8  -1   0 1451.80  108.11   3
  -8   1   0 1425.37   68.91   1
  -8  -1   0 1414.08   69.28   1
  -9  -1   0   24.57   12.36   1
  -9   1   0   11.05   12.01   1
   9  -1   0  104.62   24.67   3
  -9  -1   0   28.65   15.50   2
 -10   1   0  442.09   25.87   1
  10  -1   0  503.98   44.18   3
 -10   1   0  440.72   33.16   2
 -10  -1   0  467.19   26.21   1
 -10  -1   0  513.33   33.46   2
 -11  -1   0   74.14   21.13   2
 -11   1   0   41.39   12.20   1
 -11  -1   0   48.27   13.16   1
  11  -1   0   79.34   32.40   3
 -11   1   0   47.14   21.82   2
 -12   1   0   19.56   25.55   2
 -12  -1   0   15.16   10.54   1
 -12   1   0   25.54   12.18   1
  12  -1   0   39.58   33.37   3
 -13  -1   0   23.94   13.44   1
 -13   1   0   22.53   15.04   1
 -14   1   0  234.84   17.63   1
 -14  -1   0  239.46   17.85   1
 -15   1   0   37.61   15.19   1
 -15  -1   0   36.17   17.46   1
 -16  -1   0  142.53   19.77   1
 -16   1   0  156.16   17.85   1
 -17   1   0   -1.73   11.84   1
 -17  -1   0   16.05   18.25   1
 -18   1   0   -4.45    9.99   1
   1  -2   0   78.24    5.38   4
  -2  -2   0 2605.07  146.04   1
   2  -2   0 3263.63  229.09   3
  -2   2   0 3146.04  149.44   1
  -2  -2   0 3314.04  167.95   4
  -3  -2   0   29.42    8.22   2
   3  -2   0   42.37   13.41   3
  -3   2   0   40.83    5.86   1
  -3  -2   0   26.77    9.44   1
  -3  -2   0   19.36   15.13   4
   4  -2   0 1909.63  143.26   3
  -4  -2   0 2033.40  106.62   2
  -4  -2   0 1777.56   91.82   1
  -4   2   0 1953.45   91.39   1
  -4  -2   0 1917.57  105.65   4
  -5  -2   0   -0.62    1.59   1
  -5  -2   0   28.74   12.18   4
  -5   2   0   -1.64    7.36   1
  -5  -2   0   -1.48    3.07   2
  -6   2   0   38.99    7.38   1
  -6  -2   0   36.91   11.42   2
  -6  -2   0   21.28    9.28   1
  -6  -2   0   62.13   16.87   4
  -7   2   0    4.59   11.73   1
  -7  -2   0    9.77   17.90   1
  -7  -2   0   31.76   12.23   2
   8  -2   0  267.53   35.92   3
  -8  -2   0  314.36   18.78   1
  -8   2   0  311.42   16.88   1
  -8  -2   0  271.00   22.85   2
  -9  -2   0   32.92   11.85   1
  -9  -2   0   41.57   15.67   2
  -9   2   0   20.70   14.37   1
 -10  -2   0  413.92   30.07   2
 -10   2   0  385.11   22.40   1
  10  -2   0  386.99   46.85   3
 -10  -2   0  422.05   24.50   1
  11  -2   0   25.58   76.72   3
 -11  -2   0   69.79   13.74   1
 -11   2   0   75.85   11.54   1
 -12   2   0  131.50   13.54   1
 -12   2   0  142.44   24.07   2
 -12  -2   0  150.71   15.17   1
 -13  -2   0   41.28   14.77   1
 -13   2   0   55.47   12.52   1
 -14   2   0   -6.66    7.40   1
 -14  -2   0   10.06   10.52   1
 -15  -2   0   32.74   16.48   1
 -15   2   0   50.28   14.65   1
 -16   2   0   72.03   16.18   1
 -16  -2   0   64.54   17.40   1
 -17   2   0   31.75   18.02   1
 -17  -2   0    8.51   12.07   1
 -18   2   0   51.47   18.60   1
   0  -3   0    2.29    2.45   1
   0  -3   0   -2.11    3.92   4
   1  -3   0  827.15   45.16   4
  -1  -3   0  826.13   62.28   3
   1  -3   0  757.00   61.81   3
  -1  -3   0  799.58   39.08   1
  -1  -3   0  869.02   45.41   4
  -2  -3   0  498.74   40.88   3
  -2  -3   0  494.75   29.81   2
   2  -3   0  559.21   40.28   3
  -2  -3   0  591.49   30.40   4
  -2   3   0  484.92   24.94   1
  -2  -3   0  524.18   25.65   1
  -3  -3   0  994.57   57.32   2
  -3   3   0 1023.58   48.89   1
   3  -3   0 1129.69   77.55   3
  -3  -3   0 1063.51   57.21   4
  -3  -3   0  919.87   49.49   1
  -4  -3   0  104.81   17.64   4
  -4  -3   0  132.46   11.40   1
   4  -3   0  141.94   17.40   3
  -4   3   0  135.72    7.94   1
  -4  -3   0  123.49   10.67   2
  -5  -3   0    7.20   10.21   2
  -5  -3   0   14.45    9.34   1
  -5   3   0    8.90    7.58   1
   5  -3   0   19.90   13.58   3
  -5  -3   0   11.68   12.76   4
  -6   3   0    5.80    6.44   1
  -6  -3   0   15.19    8.87   2
  -6  -3   0   19.57   18.27   4
  -6  -3   0   -3.98    5.80   1
   6  -3   0   14.98   10.64   3
  -7  -3   0   59.87   12.29   2
  -7   3   0   48.64    7.90   1
  -7  -3   0   57.52   12.62   1
  -7  -3   0   74.90   18.49   4
   7  -3   0   63.13   14.93   3
   8  -3   0  607.49   48.06   3
  -8  -3   0  564.35   31.60   1
  -8   3   0  608.70   30.49   1
  -8  -3   0  649.50   35.92   2
  -9  -3   0  797.93   45.96   2
   9  -3   0  790.65   61.28   3
  -9   3   0  769.08   39.20   1
  -9  -3   0  800.83   40.54   1
 -10   3   0  246.84   16.24   1
  10  -3   0  271.32   28.73   3
 -10  -3   0  251.49   20.85   1
  11  -3   0   55.99   18.72   3
 -11  -3   0   45.11   15.68   1
 -11   3   0   20.29   10.59   1
 -12  -3   0    0.90    5.27   1
 -12   3   0    1.59    5.59   1
 -13   3   0   -7.35   15.89   2
 -13   3   0   13.40   10.72   1
 -13  -3   0    5.48   15.47   1
 -14  -3   0  157.67   18.78   1
 -14   3   0  171.29   16.15   1
 -15  -3   0   85.91   18.13   1
 -15   3   0   78.89   16.13   1
 -16  -3   0   30.16   20.48   1
 -16   3   0   70.22   17.01   1
 -17   3   0   11.89   20.33   1
 -17  -3   0   25.32   24.76   1
 -18   3   0   13.66   19.92   1
   0  -4   0 1400.36   77.56   4
   0  -4   0 1453.01   67.05   1
   0  -4   0 1372.94  106.31   3
   1  -4   0 2141.86  160.05   3
  -1  -4   0 2133.02  160.27   3
   1  -4   0 2198.65  117.05   4
  -1  -4   0 2100.37  117.12   4
  -1  -4   0 2121.87  101.61   1
  -2  -4   0  217.91   11.74   1
   2  -4   0  227.39   14.39   4
   2  -4   0  184.09   19.75   3
  -2  -4   0  206.98   21.42   3
  -2  -4   0  211.75   16.37   4
   3  -4   0    7.10    8.05   3
  -3  -4   0    8.58   16.11   4
  -3  -4   0   -6.75    5.38   1
  -3  -4   0   -8.43    5.78   2
  -3   4   0    2.04    2.66   1
   4  -4   0   -4.64   13.16   3
  -4   4   0    4.27    4.60   1
  -4  -4   0   -3.73    6.65   2
  -4  -4   0    6.11    6.86   1
  -5  -4   0   94.07   10.83   2
  -5  -4   0   63.85   21.72   4
   5  -4   0   88.65   17.50   3
  -5  -4   0   76.63   12.13   1
  -5   4   0   97.14    7.00   1
  -6  -4   0 1801.18   88.52   1
  -6   4   0 1940.99   87.50   1
  -6  -4   0 1661.53  101.90   4
   6  -4   0 1996.33  137.71   3
  -6  -4   0 1742.42  102.06   2
  -7  -4   0  333.60   29.38   4
   7  -4   0  379.71   32.35   3
  -7  -4   0  333.21   23.54   2
  -7  -4   0  315.86   20.75   1
  -7   4   0  372.04   18.31   1
  -8  -4   0  127.16   18.37   1
  -8   4   0  174.35   11.48   1
  -8  -4   0  117.38   16.54   2
  -8  -4   0  174.75   24.61   4
   8  -4   0  165.91   24.05   3
  -9  -4   0  277.41   30.22   4
  -9   4   0  282.03   16.30   1
  -9  -4   0  276.50   21.03   1
   9  -4   0  278.05   30.04   3
 -10  -4   0   88.55   17.08   1
 -10   4   0   84.47   11.25   1
  10  -4   0   67.85   20.96   3
 -11   4   0  395.67   21.72   1
 -11  -4   0  428.52   24.59   1
  11  -4   0  386.98   36.12   3
 -12  -4   0  133.86   18.47   1
 -12   4   0  132.31   13.25   1
 -13   4   0  246.33   17.22   1
 -13  -4   0  224.50   20.66   1
 -14  -4   0   13.54   12.41   1
 -14   4   0    2.75    4.64   1
 -15   4   0   11.65   14.52   1
 -15  -4   0    8.89   19.80   1
 -16   4   0   47.61   18.33   1
 -16  -4   0   24.32   27.45   1
 -17  -4   0   58.42   24.21   1
   0  -5   0    0.25    2.33   1
   0  -5   0   -2.47   23.38   4
   0  -5   0   -0.48   69.44   3
  -1  -5   0 2238.58  104.09   1
   1  -5   0 2245.82  120.00   4
   1  -5   0 2065.49  163.97   3
  -1  -5   0 2297.56  164.46   3
  -1  -5   0 2098.93  120.02   4
  -2  -5   0  336.09   16.43   1
  -2  -5   0  361.50   29.40   3
   2  -5   0  265.80   27.15   3
  -2  -5   0  309.84   21.71   4
   2  -5   0  338.20   19.84   4
  -3  -5   0  872.94   40.49   1
   3  -5   0  798.77   63.38   3
   3  -5   0  840.61   46.39   4
  -3  -5   0  815.76   64.21   3
  -3  -5   0  805.89   46.99   4
   4  -5   0   38.14   13.60   3
  -4  -5   0   35.36    9.48   1
  -4  -5   0   33.42   13.20   2
  -4   5   0   34.39    4.37   1
  -4  -5   0   43.82   11.49   4
  -5  -5   0 1172.50   59.80   1
  -5   5   0 1216.45   58.66   1
   5  -5   0 1303.32   93.05   3
  -5  -5   0 1146.70   69.54   4
  -5  -5   0 1283.24   69.20   2
  -6  -5   0   -5.99    7.03   2
  -6  -5   0  -10.57   21.21   4
  -6   5   0    9.31    6.25   1
  -6  -5   0   13.44   11.27   1
   7  -5   0  403.42   37.98   3
  -7   5   0  456.85   21.96   1
  -7  -5   0  420.18   37.04   4
  -7  -5   0  435.05   26.76   2
  -7  -5   0  425.16   25.51   1
  -8  -5   0   51.56   16.03   1
  -8   5   0   31.47    8.80   1
   8  -5   0   11.73   33.64   3
  -8  -5   0   65.93   22.13   4
  -8  -5   0   34.62   11.34   2
  -9   5   0  373.98   19.74   1
   9  -5   0  341.95   34.62   3
  -9  -5   0  364.84   34.57   4
  -9  -5   0  374.46   24.50   1
 -10   5   0    2.95    8.89   1
 -10  -5   0    8.43   16.02   1
 -10  -5   0   13.79   23.09   4
 -11   5   0    3.47   13.96   1
 -11  -5   0    9.87   25.58   1
 -12   5   0   -0.98   12.04   1
 -12  -5   0    9.32   18.73   1
 -13   5   0  271.58   18.68   1
 -13  -5   0  308.58   22.49   1
 -14  -5   0  206.96   20.93   1
 -15  -5   0   86.91   19.55   1
 -16  -5   0    1.33   62.52   1
   0  -6   0  341.30   30.65   3
   0  -6   0  339.79   21.22   4
   0  -6   0  333.90   16.54   1
  -1  -6   0  888.91   56.23   4
   1  -6   0  990.08   77.25   3
  -1  -6   0 1011.20   77.64   3
   1  -6   0 1061.21   56.41   4
  -1  -6   0 1089.85   48.52   1
  -2  -6   0    1.56   45.67   3
  -2  -6   0    1.90    5.30   1
   2  -6   0    5.92   22.25   3
   2  -6   0   -1.55   55.17   4
  -3   6   0    1.26    1.69   1
  -3  -6   0   30.06   18.03   3
  -3   6   0    1.62    1.79   1
  -3  -6   0    7.10   12.16   4
   3  -6   0    3.62   17.94   3
   3  -6   0    3.46   12.81   4
  -3  -6   0    4.39    8.68   1
  -4  -6   0  238.47   13.78   1
  -4  -6   0  244.17   19.08   4
   4  -6   0  242.53   15.34   4
  -4   6   0  159.72   10.01   1
   4  -6   0  265.58   21.62   3
   5  -6   0 1624.82   86.00   4
  -5  -6   0 1470.16   87.15   4
  -5   6   0 1426.75   73.84   1
   5  -6   0 1688.96  117.36   3
  -5  -6   0 1550.61   75.19   1
  -6  -6   0   73.52   29.41   4
  -6  -6   0   91.73   15.03   1
  -6   6   0   84.70    7.70   1
   6  -6   0  112.58   18.96   3
  -6  -6   0   91.90   14.88   2
  -7  -6   0  393.84   39.76   4
  -7  -6   0  502.07   27.67   1
  -7  -6   0  491.26   30.37   2
  -7   6   0  525.65   24.93   1
   7  -6   0  493.71   41.02   3
  -8   6   0   37.58    9.26   1
  -8  -6   0   53.50   15.46   1
  -8  -6   0   73.80   30.28   4
   8  -6   0   62.30   16.98   3
   9  -6   0   19.13   14.85   3
  -9   6   0   14.42    7.49   1
  -9  -6   0   52.16   22.47   4
  -9  -6   0   26.97   18.79   1
 -10  -6   0    8.94   14.25   1
  10  -6   0    7.73   14.02   3
 -10  -6   0   55.82   24.66   4
 -10   6   0    1.26    6.55   1
  11  -6   0  379.67   37.16   3
 -11  -6   0  397.51   26.22   1
 -11   6   0  447.77   22.83   1
 -12  -6   0    8.11   13.65   1
 -13  -6   0  164.99   21.32   1
 -14  -6   0   40.66   20.62   1
 -15  -6   0   25.21   22.58   1
 -16  -6   0   10.04   20.57   1
   0  -7   0    0.86    2.33   1
   0  -7   0    7.81   11.34   4
   0  -7   0    1.09   15.27   3
   1  -7   0   47.63   13.02   4
  -1  -7   0   46.83    6.09   1
  -1  -7   0   52.10   12.13   4
  -1  -7   0   51.75   21.82   3
   1  -7   0   29.62   21.94   3
  -2  -7   0   -7.82  133.12   3
  -2  -7   0   -7.24    9.96   4
  -2  -7   0    8.33    5.43   1
   2  -7   0   -3.07   15.89   3
   2  -7   0   -8.26   13.74   4
   3  -7   0 3389.01  266.44   3
  -3  -7   0 3783.91  267.56   3
   3  -7   0 3752.76  195.28   4
  -3  -7   0 3674.04  169.65   1
  -3  -7   0 3227.10  195.37   4
  -4  -7   0  174.44   13.17   1
   4  -7   0  192.18   22.65   3
  -4  -7   0  176.53   19.42   4
   4  -7   0  167.52   16.22   4
   5  -7   0  134.84   15.49   4
  -5  -7   0  129.19   20.12   4
  -5   7   0   69.37    5.66   1
   5  -7   0  108.97   20.35   3
  -5  -7   0  111.22   12.37   1
  -6  -7   0   -0.28    2.60   1
   6  -7   0    5.31   21.41   3
  -6   7   0   -0.77    3.96   1
   6  -7   0   15.14   13.27   4
  -7  -7   0   45.00   14.72   1
  -7   7   0   31.40    8.34   1
   7  -7   0   42.11   20.48   3
  -7  -7   0   24.57   37.93   4
  -8  -7   0    7.68    8.09   1
   8  -7   0   18.14   14.23   3
  -9  -7   0  971.98   48.38   1
   9  -7   0  967.28   73.19   3
  -9  -7   0  855.51   59.07   4
  10  -7   0   19.00   16.56   3
 -10  -7   0   18.32   16.27   1
 -10  -7   0   85.82   29.94   4
 -11  -7   0   50.78   28.83   4
 -11  -7   0   17.18   14.56   1
  11  -7   0   19.96   20.90   3
 -12  -7   0   27.48   16.06   1
 -13  -7   0   51.37   19.66   1
 -14  -7   0   21.37   20.42   1
 -15  -7   0  419.96   30.36   1
 -16  -7   0   14.37   21.16   1
   0  -8   0  680.90   53.25   3
   0  -8   0  621.09   37.90   4
   1  -8   0   56.40   21.85   3
  -1  -8   0   65.21    6.87   1
  -1  -8   0   70.49   22.50   3
   1  -8   0   58.73   14.76   4
  -1  -8   0   64.16   15.93   4
  -2  -8   0    1.79   16.58   1
  -2  -8   0   12.61   19.90   3
   2  -8   0   -4.51   18.29   4
  -3  -8   0  160.49   21.98   4
  -3  -8   0  161.06   11.74   1
   3  -8   0  150.10   17.77   4
  -3  -8   0  188.53   28.57   3
   3  -8   0  151.22   24.75   3
   4  -8   0  129.20   17.13   4
  -4  -8   0  128.37   11.48   1
   4  -8   0  139.39   23.03   3
  -4  -8   0  123.15   18.98   4
   5  -8   0  600.31   35.79   4
   5  -8   0  580.43   48.15   3
  -5  -8   0  608.77   30.54   1
  -5  -8   0  576.91   39.03   4
   6  -8   0   11.37   13.32   4
   6  -8   0    4.11   10.20   3
  -6  -8   0    4.75    8.84   1
  -7  -8   0  828.02   45.14   1
  -7  -8   0  875.09   58.12   4
   7  -8   0  958.71   70.03   3
   7  -8   0  906.60   51.41   4
   8  -8   0   10.23   11.12   4
   8  -8   0    4.24 1267.64   3
  -8  -8   0   -3.66    8.16   1
  -9  -8   0   12.37   10.95   1
   9  -8   0    4.31   14.59   3
  -9  -8   0   25.03   24.82   4
 -10  -8   0    5.40   33.09   1
  10  -8   0    7.00   16.48   3
 -10  -8   0   54.76   26.78   4
 -11  -8   0  189.69   31.31   4
 -12  -8   0   80.92   27.64   4
 -13  -8   0    7.46   21.71   1
 -14  -8   0   24.55   20.29   1
 -15  -8   0   34.97   20.05   1
   0  -9   0    6.79   16.18   3
   0  -9   0   -1.78   23.51   4
  -1  -9   0  535.41   24.81   1
   1  -9   0  471.75   43.48   3
   1  -9   0  504.99   31.76   4
  -1  -9   0  449.77   33.19   4
  -1  -9   0  502.02   44.65   3
  -2  -9   0  485.27   34.54   4
   2  -9   0  481.65   33.16   4
  -2  -9   0  583.93   26.47   1
   2  -9   0  481.28   44.27   3
  -2  -9   0  557.66   47.05   3
   3  -9   0    2.93   10.90   3
  -3  -9   0   19.37   24.12   4
   3  -9   0   12.81   19.97   4
  -3  -9   0   22.38    9.17   1
  -3  -9   0   24.94   20.08   3
  -4  -9   0    7.91    9.05   1
   4  -9   0   -4.63   21.01   4
   4  -9   0    4.75  104.75   3
  -4  -9   0    8.62   12.61   4
   5  -9   0  126.90   23.25   3
  -5  -9   0  166.34   19.79   4
   5  -9   0  149.77   17.70   4
  -5  -9   0  138.80   12.81   1
   6  -9   0   40.91   13.72   4
  -6  -9   0   25.75    9.81   1
   6  -9   0   18.71   18.05   3
  -7  -9   0  318.67   19.92   1
   7  -9   0  323.79   29.97   3
   7  -9   0  333.20   22.84   4
  -7  -9   0  326.06   33.40   4
   8  -9   0  327.12   30.14   3
  -8  -9   0  285.09   36.72   4
  -8  -9   0  278.59   19.62   1
   8  -9   0  320.86   22.63   4
  -9  -9   0   83.46   15.40   1
  -9  -9   0   76.46   37.68   4
   9  -9   0   83.32   22.69   3
   9  -9   0   95.13   17.07   4
 -10  -9   0   91.19   16.06   1
 -10  -9   0  156.55   30.29   4
  10  -9   0   97.08   22.69   3
  10  -9   0  104.80   16.94   4
  11  -9   0   16.14   17.73   4
 -11  -9   0   50.40   34.33   4
 -11  -9   0    9.74   12.15   1
 -12  -9   0   18.26   15.18   1
  12  -9   0   -0.10    3.93   4
 -12  -9   0   84.45   31.09   4
 -13  -9   0  203.81   21.70   1
 -14  -9   0   18.88   21.63   1
 -15  -9   0   83.69   22.92   1
   0 -10   0  544.95   35.04   4
   0 -10   0  584.71   48.25   3
   1 -10   0  339.72   31.80   3
  -1 -10   0  320.51   36.71   3
  -1 -10   0  318.81   26.60   4
   1 -10   0  310.94   23.89   4
  -2 -10   0   97.91   21.46   4
   2 -10   0   95.83   23.68   3
   2 -10   0  106.20   17.33   4
  -2 -10   0   96.05   25.70   3
   3 -10   0   22.89   23.57   3
   3 -10   0   12.24   13.73   4
  -3 -10   0   32.01    9.57   1
  -3 -10   0   13.71   20.72   4
  -3 -10   0   68.98   24.87   3
  -4 -10   0   72.96    9.90   1
   4 -10   0   46.67   21.67   3
  -4 -10   0   81.79   19.18   4
   4 -10   0   46.17   16.11   4
  -5 -10   0  311.13   18.05   1
   5 -10   0  340.11   30.41   3
   5 -10   0  278.84   21.53   4
  -5 -10   0  311.95   25.80   4
   6 -10   0 1014.70   57.30   4
  -6 -10   0 1028.15   49.68   1
  -6 -10   0  945.54   60.84   4
   6 -10   0  971.89   77.48   3
   7 -10   0  363.38   26.78   4
   7 -10   0  446.11   36.00   3
  -7 -10   0  410.03   23.00   1
  -7 -10   0  389.63   37.43   4
   8 -10   0  202.73   24.60   3
   8 -10   0  169.63   18.63   4
  -8 -10   0  180.96   33.26   4
  -8 -10   0  155.45   16.02   1
  -9 -10   0   15.36   13.00   1
   9 -10   0   -3.01   14.33   3
  -9 -10   0   10.10   41.28   4
   9 -10   0   14.83   16.69   4
  10 -10   0    2.31   20.38   3
  10 -10   0   21.69   18.35   4
 -10 -10   0   -0.58    6.72   1
  11 -10   0  144.30   20.32   4
 -11 -10   0  176.75   32.99   4
 -11 -10   0  134.11   18.16   1
  12 -10   0   41.94   19.81   4
 -12 -10   0   81.99   31.78   4
 -12 -10   0   44.10   18.33   1
 -13 -10   0  198.61   37.92   4
  13 -10   0  112.61   21.76   4
 -13 -10   0  119.85   20.18   1
 -14 -10   0    3.71   48.47   1
  14 -10   0    9.10   15.02   4
   0 -11   0    3.87   29.81   3
   0 -11   0   21.98   13.46   4
   1 -11   0   32.08   12.71   4
   1 -11   0   34.95   19.91   3
  -1 -11   0   24.96   23.50   3
   2 -11   0    4.43   23.17   3
  -2 -11   0   10.52   20.01   4
   2 -11   0    8.50   14.17   4
  -2 -11   0   32.08   19.92   3
  -3 -11   0  763.09   46.26   4
   3 -11   0  776.79   61.91   3
   3 -11   0  720.44   45.29   4
  -3 -11   0  847.30   64.18   3
   4 -11   0   50.66   16.23   4
  -4 -11   0   45.85   19.58   4
   4 -11   0   47.22   21.20   3
   5 -11   0   15.75   14.47   4
   5 -11   0   10.34   19.76   3
  -5 -11   0   41.52   18.82   4
   6 -11   0   12.80   18.30   4
  -6 -11   0    7.37   11.12   1
   6 -11   0   15.77   25.67   3
  -7 -11   0   -4.40   17.73   4
  -7 -11   0    6.13   20.77   1
   7 -11   0   17.66   21.92   3
   7 -11   0    2.63   31.28   4
  -8 -11   0   34.38   13.19   1
   8 -11   0   18.30   15.32   4
  -8 -11   0   16.40   25.52   4
   8 -11   0   28.94   22.82   3
   9 -11   0  429.57   35.42   3
  -9 -11   0  366.14   38.40   4
  -9 -11   0  327.10   22.83   1
   9 -11   0  344.86   26.28   4
  10 -11   0  103.10   19.53   4
 -10 -11   0  131.36   35.06   4
  10 -11   0  108.91   26.99   3
 -10 -11   0   95.61   16.08   1
 -11 -11   0   28.22   18.26   1
 -11 -11   0   48.30   32.29   4
  11 -11   0   24.85   18.57   4
 -12 -11   0   37.95   18.60   1
 -12 -11   0  130.45   34.71   4
  12 -11   0   55.82   21.94   4
 -13 -11   0   67.64   37.29   4
  13 -11   0   36.76   19.52   4
 -13 -11   0   14.74   15.46   1
 -14 -11   0   65.34   20.87   1
   0 -12   0   32.69   26.99   3
   0 -12   0   29.48   22.56   4
  -1 -12   0  106.22   21.62   4
   1 -12   0  104.50   22.23   3
  -1 -12   0  129.74   25.53   3
   1 -12   0  110.74   17.31   4
   2 -12   0   16.73   16.66   4
  -2 -12   0    9.10   18.93   4
  -2 -12   0   16.14   22.56   3
   2 -12   0    6.56   16.09   3
   3 -12   0   -1.12   43.22   4
  -3 -12   0   22.72   17.66   4
  -3 -12   0   26.95   21.18   3
   3 -12   0   10.45   16.51   3
   4 -12   0  139.50   24.28   3
  -4 -12   0  147.69   22.43   4
   4 -12   0  120.19   17.55   4
  -5 -12   0   37.63   17.26   4
   5 -12   0   17.01   16.06   4
   5 -12   0   26.81   19.54   3
   6 -12   0  167.61   19.38   4
  -6 -12   0  142.71   29.76   4
   6 -12   0  179.76   25.39   3
   7 -12   0    8.41   23.99   3
  -7 -12   0   23.73   34.01   4
   7 -12   0   17.35   18.14   4
   8 -12   0   73.25   24.92   3
   8 -12   0   74.09   19.15   4
  -8 -12   0  104.38   32.71   4
   9 -12   0   65.37   24.65   3
  -9 -12   0   28.07   36.29   4
   9 -12   0   47.47   19.31   4
 -10 -12   0   33.97   34.99   4
  10 -12   0   14.99   18.15   4
 -11 -12   0   94.12   33.30   4
  11 -12   0   28.14   20.44   4
 -11 -12   0   28.23   16.74   1
 -12 -12   0   64.90   34.08   4
 -12 -12   0    5.21   31.59   1
 -13 -12   0   42.14   19.83   1
   0 -13   0   13.70   21.14   3
   0 -13   0    0.74    3.26   4
  -1 -13   0    3.11   14.40   4
   1 -13   0   35.21   18.60   4
  -1 -13   0   23.51   21.96   3
   1 -13   0   21.22   22.03   3
   2 -13   0  153.55   19.50   4
  -2 -13   0  159.49   22.62   4
  -2 -13   0  175.96   29.37   3
   2 -13   0  177.76   26.44   3
  -3 -13   0   17.73   16.50   4
   3 -13   0   12.28   18.76   3
   3 -13   0    0.42    6.18   4
  -3 -13   0   13.79   19.27   3
   4 -13   0   64.33   16.89   4
  -4 -13   0   60.24   21.17   4
   4 -13   0   69.08   21.71   3
   5 -13   0   -6.29   17.63   3
  -5 -13   0   31.97   17.76   4
   5 -13   0   -6.09   19.31   4
   6 -13   0    4.65   13.08   3
  -7 -13   0    9.71  437.56   4
   7 -13   0    9.66   19.69   4
   7 -13   0   27.33   26.89   3
  -8 -13   0  243.85   34.10   4
   8 -13   0  209.01   22.02   4
   8 -13   0  235.19   31.21   3
   9 -13   0   -4.19  980.27   3
  -9 -13   0   16.42   48.90   4
  10 -13   0   42.34   21.62   4
 -10 -13   0   59.58   26.62   4
 -11 -13   0   31.58   28.22   4
   0 -14   0  571.79   50.90   3
   0 -14   0  603.26   39.03   4
   1 -14   0   35.43   26.78   3
  -1 -14   0   26.26   22.80   4
  -1 -14   0   52.51   23.47   3
   1 -14   0   -1.70    8.23   4
   2 -14   0   89.48   26.59   3
   2 -14   0   99.33   20.30   4
  -2 -14   0  106.85   28.80   3
  -2 -14   0   88.77   22.36   4
  -3 -14   0   54.43   21.82   4
   3 -14   0   48.38   27.41   3
   3 -14   0   47.75   18.62   4
  -4 -14   0   41.11   18.33   4
   4 -14   0    7.84   31.78   4
   4 -14   0    5.77   25.32   3
  -5 -14   0   15.73   21.37   4
   5 -14   0   -2.35   30.02   4
  -6 -14   0  116.95   34.59   4
   6 -14   0  133.92   26.31   3
   6 -14   0  117.05   19.77   4
   7 -14   0   28.77   18.06   4
   7 -14   0   14.81   21.14   3
  -7 -14   0   -1.12   33.05   4
   8 -14   0   22.89   25.32   3
  -8 -14   0   16.35   30.48   4
   9 -14   0   -7.10   11.45   4
  -9 -14   0   30.17   32.19   4
   0 -15   0   20.90   20.63   3
  -1 -15   0   23.10   22.59   3
   1 -15   0   33.36   26.55   3
  -1 -15   0   48.29   25.84   4
   1 -15   0   12.73   26.65   4
   2 -15   0    7.85   39.91   4
  -2 -15   0   44.83   25.04   4
   2 -15   0   33.31   28.33   3
  -3 -15   0    5.12   17.11   4
   3 -15   0   -4.48   10.26   3
   3 -15   0   -0.22    3.54   4
   4 -15   0   59.72   20.23   4
   4 -15   0   67.83   26.23   3
  -4 -15   0   63.51   24.61   4
  -5 -15   0   20.15   22.87   4
   5 -15   0    8.79   24.59   3
   5 -15   0   -4.42   24.93   4
   6 -15   0   -1.33   26.07   4
   6 -15   0    8.25   45.73   3
   7 -15   0   13.10   25.17   4
   8 -15   0   32.16   24.09   3
   8 -15   0   33.67   26.99   4
   0 -16   0   20.62   30.94   4
   0 -16   0   54.58   27.77   3
  -1 -16   0   59.72   30.74   3
   1 -16   0    4.00   20.55   4
  -1 -16   0   39.38   22.64   4
   1 -16   0   48.54   28.21   3
   2 -16   0   93.58   30.77   3
   2 -16   0   37.02   25.53   4
  -2 -16   0   77.37   23.43   4
  -3 -16   0   16.81   26.43   4
   3 -16   0   -5.68   20.06   3
   4 -16   0   72.58   21.58   4
  -4 -16   0   73.81   24.56   4
   4 -16   0   48.16   27.51   3
   5 -16   0   48.23   21.89   4
  -5 -16   0   38.16   36.29   4
   5 -16   0   34.74   26.95   3
   6 -16   0   22.26   21.99   3
   6 -16   0   14.04   19.54   4
   7 -16   0   19.34   22.81   3
   0 -17   0    7.10   97.64   4
   1 -17   0   11.29   32.24   4
  -1 -17   0   -3.45   12.95   4
   2 -17   0   57.04   27.36   4
  -2 -17   0   98.21   26.74   4
   3 -17   0   25.20   29.52   4
   4 -17   0   36.06   29.45   4
 -18   0   1   -0.10   20.47   1
 -17   0   1   90.08   18.23   1
 -16   0   1   16.91   14.78   1
 -15   0   1   26.64   15.04   1
 -14   0   1   13.03   10.76   1
 -13   0   1  244.91   18.13   1
  13   0  -1  311.16   37.42   3
 -12   0   1   -6.74    9.81   1
  12   0  -1   93.58   27.51   3
 -11   0   1  836.33   43.04   1
 -11   0   1  866.45   50.70   2
 -10   0   1   10.49   14.33   1
  -9   0   1  165.85   14.33   1
  -9   0   1  114.45   18.94   2
  -8   0   1    8.76    8.64   1
  -7   0   1  702.78   35.05   1
  -6   0   1    3.04   90.67   1
  -5   0   1 4126.52  196.00   1
  -4   0   1   -3.67    4.04   1
  -3   0   1 1819.68   87.31   1
  -2   0  -1    8.60    4.19   2
  -2   0  -1    5.04    4.22   1
  -3   0  -1 2974.13  184.20   2
  -3   0  -1 3356.42  151.91   1
  -4   0  -1   -4.23   13.24   1
  -5   0  -1   42.93   12.36   2
  -5   0  -1   57.73    8.11   1
  -6   0  -1   -0.47    1.32   1
  -7   0  -1 3834.52  182.45   1
  -7   0  -1 3824.31  212.70   2
  -8   0  -1    1.96    8.63   1
  -8   0  -1   12.89   12.59   2
  -9   0  -1   13.78   10.04   1
  -9   0  -1   21.03   17.07   2
 -10   0  -1    3.27  204.31   1
 -10   0  -1    5.71   14.09   2
 -11   0  -1  536.80   36.34   2
  11   0   1  545.83   48.26   3
 -11   0  -1  531.53   28.48   1
 -12   0  -1   13.29    7.70   1
 -13   0  -1 1066.93   53.84   1
 -14   0  -1    7.34   12.33   1
 -15   0  -1   44.63   13.90   1
 -16   0  -1    7.68   14.25   1
 -17   0  -1   42.14   19.57   1
 -18  -1   1   -7.64   21.67   1
 -18   1   1    1.23   18.86   1
 -17  -1   1   -6.20   17.39   1
 -17   1   1    3.95   18.86   1
 -16   1   1   32.29   13.98   1
 -16  -1   1   31.73   17.87   1
 -15   1   1  123.98   16.56   1
 -15  -1   1  147.71   17.29   1
 -14  -1   1   20.77   14.69   1
 -14   1   1   46.94   13.69   1
 -13   1   1  565.71   30.93   1
 -13  -1   1  601.46   31.45   1
  13  -1  -1  565.39   58.42   3
 -12   1   1   53.96   13.41   1
  12  -1  -1   90.37   33.98   3
 -12   1   1   52.24   21.94   2
 -12  -1   1   56.91   12.80   1
  11  -1  -1  104.49   32.39   3
 -11   1   1   35.59   14.67   1
 -11  -1   1   38.39   14.72   1
  10  -1  -1  146.61   28.19   3
 -10  -1   1   69.33   14.86   1
 -10  -1   1   87.16   19.69   2
 -10   1   1   73.18   13.06   1
  -9   1   1  756.62   37.25   1
  -9  -1   1  728.24   37.69   1
  -9  -1   1  720.02   43.70   2
   9  -1  -1  766.10   61.16   3
  -8  -1   1   38.55   13.05   1
  -8   1   1   38.59   10.75   1
  -8  -1   1   37.72   11.38   2
  -7  -1   1  595.89   37.84   2
  -7   1   1  659.18   32.85   1
  -7  -1   1  679.16   33.29   1
   7  -1  -1  726.37   52.89   3
  -6  -1   1    4.53   16.44   1
  -6  -1   1   -2.54    4.10   2
  -6   1   1    5.17    7.91   1
   6  -1  -1   80.70   16.72   3
  -5   1   1  725.49   36.21   1
  -5  -1   1  711.60   36.41   1
  -5  -1   1  781.36   42.31   4
   5  -1  -1  754.04   56.97   3
  -4  -1   1   41.83   11.44   4
  -4  -1   1   34.49    8.70   1
  -4   1   1   38.44    7.12   1
  -4  -1   1   27.28    5.98   2
  -3  -1   1 3469.43  184.10   1
  -3   1   1 3972.10  175.45   1
   3  -1  -1 3561.19  285.18   3
  -2   1  -1 3252.09  163.16   1
   2  -1   1 3462.08  260.87   3
  -2  -1  -1 3628.03  187.83   4
   3  -1   1 1558.08  107.12   3
  -3  -1  -1 1349.93   79.89   2
  -3  -1  -1 1268.84   68.57   1
  -3   1  -1 1550.44   68.43   1
  -4   1  -1   68.52    7.77   1
   4  -1   1   83.71   11.19   3
  -4  -1  -1   77.19   10.37   2
  -4  -1  -1   66.42    9.22   1
  -5  -1  -1  307.43   21.17   2
   5  -1   1  326.75   27.14   3
  -5  -1  -1  293.07   17.14   1
  -5   1  -1  336.01   16.61   1
  -6  -1  -1  183.60   17.43   2
   6  -1   1  215.74   21.28   3
  -6   1  -1  184.04   12.06   1
  -6  -1  -1  191.58   13.81   1
   7  -1   1  358.68   30.24   3
  -7  -1  -1  312.77   23.77   2
  -7  -1  -1  327.09   19.22   1
  -7   1  -1  350.36   18.17   1
   8  -1   1  155.21   21.92   3
  -8   1  -1   81.38   21.77   2
  -8   1  -1   98.62   11.68   1
  -8  -1  -1  144.66   18.56   2
  -8  -1  -1  129.51   12.74   1
   9  -1   1  756.54   59.73   3
  -9   1  -1  735.50   36.70   1
  -9   1  -1  686.80   44.68   2
  -9  -1  -1  716.59   37.09   1
  -9  -1  -1  749.49   45.49   2
 -10   1  -1   -3.36    9.13   2
 -10  -1  -1    4.70   11.88   1
  10  -1   1   26.02   31.50   3
 -10  -1  -1   24.25   18.30   2
 -10   1  -1    5.51   13.83   1
 -11   1  -1  683.20   41.13   2
 -11  -1  -1  700.58   41.26   2
 -11   1  -1  589.12   32.97   1
 -11  -1  -1  615.41   33.43   1
 -12   1  -1   22.47   20.27   2
 -12   1  -1    2.21    4.31   1
 -12  -1  -1    0.16    0.74   1
 -13   1  -1   17.12    9.99   1
 -13  -1  -1    8.29   10.08   1
 -14  -1  -1   36.37   14.67   1
 -14   1  -1   26.21   13.91   1
 -15  -1  -1   66.54   17.51   1
 -15   1  -1   56.61   14.94   1
 -16   1  -1   16.52   16.10   1
 -16  -1  -1    2.60    8.93   1
 -17   1  -1   -1.90    6.01   1
 -17  -1  -1   15.14   15.57   1
 -18   2   1   20.06   16.44   1
 -17   2   1  135.68   18.25   1
 -17  -2   1  125.55   21.51   1
 -16   2   1   -8.97   14.25   1
 -16  -2   1   -3.65   50.31   1
 -15  -2   1   88.31   16.29   1
 -15   2   1   85.29   15.27   1
 -14  -2   1   25.31   15.67   1
 -14   2   1   24.96   11.08   1
 -13  -2   1    9.43   13.02   1
 -13   2   1   -2.36    5.13   1
  12  -2  -1   -6.72   20.25   3
 -12  -2   1   37.83   13.86   1
 -12   2   1   21.28   13.41   1
 -11   2   1  501.78   27.21   1
 -11  -2   1  537.87   29.15   1
  11  -2  -1  519.30   53.71   3
  10  -2  -1  195.28   41.50   3
 -10   2   1  226.10   16.14   1
 -10  -2   1  216.33   21.34   2
 -10  -2   1  243.43   19.00   1
  -9  -2   1  325.51   19.80   1
  -9   2   1  290.69   17.47   1
  -9  -2   1  306.78   22.53   2
   9  -2  -1  272.32   39.23   3
   8  -2  -1    0.21    1.18   3
  -8  -2   1   20.31   10.68   2
  -8   2   1    0.50    5.02   1
  -8  -2   1   -2.30    4.43   1
  -7  -2   1   13.16    8.14   1
  -7   2   1   17.02    7.53   1
  -7  -2   1   37.94   15.43   4
   7  -2  -1    8.23   39.75   3
  -7  -2   1   18.71   10.37   2
   6  -2  -1  919.39   66.77   3
  -6   2   1  883.05   41.72   1
  -6  -2   1  849.51   48.15   2
  -6  -2   1  811.76   49.29   4
  -6  -2   1  816.26   42.24   1
  -5  -2   1  645.83   39.76   4
  -5  -2   1  708.80   38.25   2
  -5  -2   1  635.93   33.75   1
  -5   2   1  696.23   33.22   1
   5  -2  -1  712.03   53.67   3
  -4  -2   1  422.26   22.78   1
  -4   2   1  470.03   22.05   1
  -4  -2   1  418.71   25.15   2
  -4  -2   1  483.79   27.71   4
   4  -2  -1  472.13   37.27   3
  -3   2   1 1905.16   87.71   1
   3  -2  -1 1805.12  137.80   3
  -3  -2   1 1930.32  101.20   4
  -3  -2   1 1734.88   88.05   1
   2  -2  -1 1334.54   95.47   3
  -2  -2   1 1105.49   60.64   1
  -2  -2   1 1369.74   69.98   4
  -1  -2   1   -0.39    0.83   1
   1  -2  -1   -1.94    1.95   4
  -1  -2  -1   -3.78    6.69   1
   1  -2   1    0.49    4.69   3
  -1  -2  -1    4.81    9.06   3
  -1  -2  -1    4.50    3.15   2
  -1  -2  -1    9.79    4.45   4
  -2  -2  -1   68.95   15.55   4
   2  -2   1   69.97   10.25   3
  -2  -2  -1   55.02    8.09   1
  -2  -2  -1   67.07   11.83   3
  -2  -2  -1   70.14   11.51   2
  -2   2  -1   65.85    5.28   1
  -3  -2  -1   48.71    8.67   1
  -3  -2  -1   72.81   14.08   4
  -3   2  -1   70.58    6.22   1
  -3  -2  -1   93.29    8.95   2
   3  -2   1   59.79   12.50   3
  -4   2  -1    5.92    5.00   1
  -4  -2  -1    3.31   33.66   2
  -4  -2  -1   13.51    7.69   1
   4  -2   1   12.19    8.21   3
  -4  -2  -1   30.48   10.35   4
  -5   2  -1  744.40   34.57   1
  -5  -2  -1  689.25   35.19   1
   5  -2   1  719.76   53.73   3
  -5  -2  -1  677.71   41.08   2
  -5  -2  -1  706.98   42.36   4
  -6  -2  -1   20.17   13.22   1
  -6   2  -1   37.35    7.94   1
  -6  -2  -1   31.86   12.77   2
   6  -2   1   32.05   17.99   3
  -7  -2  -1  599.99   32.39   1
   7  -2   1  622.24   51.16   3
  -7   2  -1  658.60   31.55   1
  -7  -2  -1  653.10   38.20   2
   8  -2   1  333.02   38.76   3
  -8   2  -1  397.12   20.69   1
  -8  -2  -1  396.22   23.19   1
  -8  -2  -1  410.38   28.24   2
  -9  -2  -1   14.13   15.70   2
  -9  -2  -1   17.39   15.56   1
  -9   2  -1    3.81    6.50   1
 -10  -2  -1   45.05   14.48   1
 -10  -2  -1   57.16   21.06   2
 -10   2  -1   37.94   12.03   1
 -11  -2  -1  340.02   20.26   1
 -11   2  -1  318.20   27.94   2
 -11   2  -1  317.54   19.09   1
 -12   2  -1   32.93   12.45   1
 -12  -2  -1   49.30   15.10   1
 -12   2  -1   52.64   22.95   2
 -13   2  -1   39.34   25.14   2
 -13  -2  -1   30.35   13.92   1
 -13   2  -1   28.58   11.64   1
 -14   2  -1   33.13   14.28   1
 -14  -2  -1   47.21   17.28   1
 -15   2  -1   -1.54   21.50   1
 -15  -2  -1    9.58   26.09   1
 -16  -2  -1   68.62   19.59   1
 -16   2  -1   83.69   17.36   1
 -17  -2  -1  130.28   19.77   1
 -17   2  -1  150.60   19.70   1
 -18   3   1   15.75   16.94   1
 -17   3   1   12.45   11.97   1
 -17  -3   1    4.69   25.70   1
 -16   3   1  177.83   18.72   1
 -16  -3   1  222.86   22.21   1
 -15  -3   1  248.31   21.49   1
 -15   3   1  240.11   19.00   1
 -14  -3   1  242.12   21.59   1
 -14   3   1  290.01   18.44   1
 -13   3   1   12.03   10.28   1
 -13  -3   1   23.27   16.88   1
  12  -3  -1  309.16   29.50   3
 -12  -3   1  263.26   19.64   1
 -12   3   1  253.34   17.56   1
  11  -3  -1   34.02   18.63   3
 -11  -3   1   11.18   15.37   1
 -11   3   1   12.52    9.96   1
 -10  -3   1  259.57   20.87   1
 -10   3   1  278.35   16.87   1
  10  -3  -1  281.45   36.96   3
  -9   3   1  539.55   25.73   1
   9  -3  -1  459.72   45.67   3
  -9  -3   1  502.93   27.79   1
  -9  -3   1  473.00   29.29   2
   8  -3  -1   14.38   28.94   3
  -8  -3   1   24.52   15.30   1
  -8  -3   1   71.25   20.97   4
  -8  -3   1   43.05    8.74   2
  -8   3   1   24.20    9.25   1
  -7  -3   1   36.22   12.68   1
  -7   3   1   36.20    7.88   1
  -7  -3   1   50.18    8.53   2
   7  -3  -1   78.35   15.31   3
  -7  -3   1   50.55   17.54   4
   6  -3  -1  117.85   15.59   3
  -6   3   1   98.86    8.84   1
  -6  -3   1   93.32   17.92   4
  -6  -3   1   88.10    9.55   2
  -6  -3   1   82.84   11.97   1
   5  -3  -1  272.76   23.87   3
  -5  -3   1  250.96   16.22   1
  -5  -3   1  238.54   22.49   4
  -5  -3   1  260.71   15.74   2
  -5   3   1  275.37   13.84   1
  -4  -3   1 2467.58  119.75   1
  -4   3   1 2679.66  119.20   1
  -4  -3   1 2544.29  137.69   4
  -4  -3   1 2219.26  138.95   2
   4  -3  -1 2644.61  187.41   3
  -3  -3   1 2364.50  120.26   1
  -3  -3   1 2596.58  138.34   4
   3  -3  -1 2618.97  188.71   3
   2  -3  -1 4449.22  287.30   4
  -2  -3   1 5400.69  253.25   1
  -2  -3   1 5425.13  293.70   4
   2  -3  -1 5338.37  382.89   3
   1  -3  -1 3149.61  166.21   4
  -1  -3   1 2909.85  227.30   3
   1  -3  -1 2725.03  227.20   3
  -1  -3   1 3253.77  144.59   1
  -1  -3   1 3205.55  166.40   4
   0  -3   1  544.95   28.49   4
   0  -3  -1  461.77   29.36   2
   0  -3  -1  484.57   24.30   1
   0  -3  -1  529.69   28.23   4
   0  -3  -1  465.70   39.30   3
   0  -3   1  514.08   39.50   3
   1  -3   1  608.81   41.84   3
  -1  -3  -1  501.61   26.43   1
  -1  -3  -1  538.94   30.83   4
  -1  -3  -1  527.72   31.19   2
   1  -3   1  544.05   30.48   4
  -1  -3  -1  524.92   42.72   3
  -2  -3  -1   -2.04    3.28   1
   2  -3   1    1.52   11.37   3
  -2   3  -1    1.73    3.12   1
  -2  -3  -1    3.63   17.16   3
  -2  -3  -1    4.36    5.64   2
  -2  -3  -1   14.22    8.79   4
  -3  -3  -1 1769.96   94.00   1
   3  -3   1 2006.09  146.89   3
  -3  -3  -1 2114.10  109.63   2
  -3   3  -1 1959.20   93.39   1
  -3  -3  -1 1988.40  108.35   4
   4  -3   1 1301.14   88.48   3
  -4  -3  -1 1193.94   65.98   2
  -4  -3  -1 1098.20   56.91   1
  -4  -3  -1 1054.70   65.80   4
  -4   3  -1 1206.69   56.15   1
   5  -3   1  677.36   47.54   3
  -5  -3  -1  560.92   37.99   4
  -5  -3  -1  611.85   36.04   2
  -5  -3  -1  582.10   31.17   1
  -5   3  -1  620.47   30.06   1
  -6  -3  -1  106.81   12.59   1
  -6  -3  -1  133.47   13.61   2
   6  -3   1  121.01   16.51   3
  -6   3  -1  114.93    8.96   1
  -6  -3  -1  142.12   17.70   4
  -7   3  -1   -1.26   70.14   1
  -7  -3  -1    3.36   38.23   1
  -7  -3  -1   13.70   10.56   2
  -8  -3  -1  655.29   42.30   2
   8  -3   1  690.15   53.29   3
  -8   3  -1  695.16   33.99   1
  -8  -3  -1  681.20   35.39   1
   9  -3   1  715.83   57.75   3
  -9  -3  -1  753.21   38.51   1
  -9  -3  -1  683.62   45.67   2
  -9   3  -1  785.75   36.95   1
 -10  -3  -1  940.34   47.64   1
 -10   3  -1  972.87   46.33   1
  10  -3   1  890.62   71.74   3
 -11  -3  -1   16.34   13.82   1
 -11   3  -1    6.66    8.29   1
 -12  -3  -1   20.69   13.45   1
 -12   3  -1   19.30   11.94   1
 -13   3  -1   18.36   11.97   1
 -13  -3  -1    5.29   11.71   1
 -14   3  -1   14.01   12.33   1
 -14  -3  -1   11.95   13.24   1
 -15   3  -1   77.05   15.86   1
 -15  -3  -1   61.12   18.55   1
 -16   3  -1  103.47   18.00   1
 -16  -3  -1   99.86   19.75   1
 -17   3  -1   14.11   20.09   1
 -17  -3  -1   14.57   17.88   1
 -17  -4   1   87.91   24.61   1
 -16  -4   1   11.01   22.23   1
 -16   4   1   59.54   15.73   1
 -15  -4   1   26.40   18.62   1
 -15   4   1   27.49   15.44   1
 -14   4   1    3.15    6.42   1
 -14  -4   1    7.55   18.67   1
 -13   4   1    0.64   10.80   1
 -13  -4   1   15.08   14.86   1
  12  -4  -1  343.91   35.16   3
 -12  -4   1  385.15   23.86   1
 -12   4   1  371.81   20.80   1
  11  -4  -1  266.48   28.24   3
 -11   4   1  268.94   16.45   1
 -11  -4   1  267.85   19.35   1
 -10  -4   1  412.02   26.16   1
  10  -4  -1  471.61   39.75   3
 -10   4   1  443.07   23.71   1
   9  -4  -1   32.80   19.06   3
  -9  -4   1    9.57   11.33   1
  -9   4   1    7.75    9.12   1
  -9  -4   1   51.32   19.82   4
  -8  -4   1   18.29   14.35   1
  -8  -4   1   18.73    6.59   2
  -8  -4   1   49.01   23.26   4
   8  -4  -1   17.80   18.77   3
  -8   4   1   11.19    8.83   1
   7  -4  -1  359.76   29.80   3
  -7  -4   1  324.46   19.43   2
  -7  -4   1  281.03   28.74   4
  -7  -4   1  318.15   20.14   1
  -7   4   1  315.43   17.06   1
  -6  -4   1  192.05   13.08   2
  -6   4   1  183.48   11.33   1
  -6  -4   1  199.17   14.83   1
  -6  -4   1  182.63   23.18   4
   6  -4  -1  192.26   22.54   3
  -5  -4   1  686.06   41.26   2
  -5  -4   1  656.62   43.74   4
  -5   4   1  751.55   35.48   1
  -5  -4   1  778.05   36.66   1
   5  -4  -1  785.87   56.86   3
  -4   4   1  431.56   21.72   1
  -4  -4   1  452.63   22.85   1
   4  -4  -1  463.67   36.83   3
  -4  -4   1  440.13   27.72   4
  -3  -4   1 1190.51   54.03   1
  -3  -4   1 1105.43   62.36   4
   3  -4  -1 1017.40   61.64   4
   3  -4  -1 1166.85   84.73   3
   2  -4  -1  317.80   18.79   4
  -2  -4   1  320.38   20.64   4
  -2  -4   1  340.05   16.26   1
  -2  -4   1  311.29   27.60   3
   2  -4  -1  294.50   26.93   3
   1  -4  -1  615.85   33.47   4
   1  -4  -1  522.81   46.31   3
  -1  -4   1  625.47   33.76   4
  -1  -4   1  639.59   46.71   3
  -1  -4   1  585.44   28.75   1
   0  -4   1 1281.30   99.23   3
   0  -4  -1 1368.55   72.44   4
   0  -4  -1 1285.17   62.74   1
   0  -4   1 1410.77   72.57   4
   0  -4  -1 1235.88   99.27   3
  -1  -4  -1 1680.01  104.45   2
   1  -4   1 1743.24  140.30   3
   1  -4   1 1973.76  102.81   4
  -1  -4  -1 1965.13  102.99   4
  -1  -4  -1 1895.78   89.33   1
  -1  -4  -1 1997.75  140.94   3
  -2  -4  -1  266.69   14.81   1
   2  -4   1  283.33   23.75   3
  -2  -4  -1  267.01   24.57   3
  -2  -4  -1  282.35   18.52   2
  -2  -4  -1  299.39   19.14   4
   2  -4   1  279.29   17.34   4
  -3  -4  -1  171.62   11.83   1
  -3  -4  -1  171.67   18.96   4
  -3   4  -1  168.94    8.83   1
   3  -4   1  190.87   17.13   3
  -3  -4  -1  189.13   13.42   2
  -3  -4  -1  152.29   19.84   3
  -4   4  -1  159.10    8.94   1
  -4  -4  -1  164.80   13.51   2
  -4  -4  -1  139.51   20.78   4
  -4  -4  -1  149.81   13.08   1
   4  -4   1  185.37   16.65   3
  -5  -4  -1  265.66   24.69   4
  -5   4  -1  289.68   14.53   1
   5  -4   1  315.15   24.39   3
  -5  -4  -1  275.75   17.49   1
  -5  -4  -1  249.79   20.68   2
  -6  -4  -1 1241.28   70.12   2
  -6  -4  -1 1041.98   70.53   4
  -6  -4  -1 1259.22   60.96   1
   6  -4   1 1353.38   93.92   3
  -6   4  -1 1275.80   59.61   1
   7  -4   1  456.75   37.76   3
  -7   4  -1  451.72   22.67   1
  -7  -4  -1  421.26   34.02   4
  -7  -4  -1  454.87   25.74   1
  -7  -4  -1  437.51   29.15   2
  -8  -4  -1  108.45   16.37   1
   8  -4   1   73.21   21.25   3
  -8  -4  -1  145.17   27.48   4
  -8   4  -1   78.33    9.66   1
  -8  -4  -1   70.01   17.50   2
  -9  -4  -1   27.28   14.83   2
  -9   4  -1   32.23   10.26   1
   9  -4   1   18.48   22.05   3
  -9  -4  -1   49.36   15.75   1
  10  -4   1   14.63   22.34   3
 -10  -4  -1   26.82   14.92   1
 -10   4  -1   18.07   10.23   1
 -11  -4  -1  140.17   17.23   1
 -11   4  -1  144.04   13.04   1
 -12   4  -1  343.56   20.01   1
 -12  -4  -1  323.50   23.62   1
 -13   4  -1  630.62   42.93   2
 -13  -4  -1  631.33   34.80   1
 -13   4  -1  586.77   32.57   1
 -14  -4  -1   14.83   21.06   1
 -14   4  -1   11.56   11.57   1
 -15   4  -1   25.46   16.04   1
 -15  -4  -1   20.71   20.02   1
 -16  -4  -1   38.45   19.86   1
 -17  -5   1   18.64   23.67   1
 -16  -5   1   10.95   22.32   1
 -15  -5   1    1.15    7.68   1
 -14   5   1   58.57   15.14   1
 -14  -5   1   65.17   18.92   1
 -13   5   1    4.42    7.46   1
 -13  -5   1    1.38    3.01   1
 -12  -5   1   25.86   16.27   1
  12  -5  -1   23.66   21.17   3
 -12   5   1   34.65   11.50   1
  11  -5  -1   82.26   24.32   3
 -11  -5   1   73.61   17.11   1
 -11   5   1   99.89   12.11   1
 -10  -5   1   28.54   13.12   1
 -10  -5   1   60.39   21.73   4
  10  -5  -1   20.39   18.24   3
 -10   5   1   19.32    8.97   1
  -9   5   1   81.87   10.70   1
  -9  -5   1  105.94   16.73   1
   9  -5  -1   78.17   25.50   3
  -9  -5   1  115.48   28.24   4
  -8   5   1  809.58   37.97   1
  -8  -5   1  716.72   51.72   4
   8  -5  -1  766.61   60.46   3
  -8  -5   1  752.60   39.61   1
  -7  -5   1  341.61   33.15   4
   7  -5  -1  327.83   31.11   3
  -7  -5   1  321.26   19.82   2
  -7  -5   1  323.59   20.98   1
  -7   5   1  323.71   16.98   1
   6  -5  -1  144.28   21.50   3
  -6   5   1  155.06    9.28   1
  -6  -5   1  125.19   26.44   4
  -6  -5   1  150.35   14.53   1
  -5  -5   1   20.11    9.88   1
   5  -5  -1   15.95   47.63   3
  -5  -5   1   45.18   14.60   4
  -5   5   1   22.61    5.49   1
   4  -5  -1   75.50   10.02   4
  -4  -5   1   68.46   10.46   1
  -4   5   1   67.92    5.64   1
  -4  -5   1   83.19   17.23   4
   4  -5  -1   80.46   16.57   3
  -3  -5   1  164.96   18.77   4
   3  -5  -1  191.07   14.88   4
   3  -5  -1  190.77   20.59   3
  -3  -5   1  215.05   12.30   1
  -2  -5   1 2430.17  133.50   4
   2  -5  -1 2458.27  133.16   4
   2  -5  -1 2288.90  182.10   3
  -2  -5   1 2426.17  182.48   3
  -2  -5   1 2558.46  115.75   1
  -1  -5   1    1.05    2.65   1
  -1  -5   1    1.85 2444.96   3
  -1  -5   1   -3.32   23.50   4
   1  -5  -1   -6.49   17.55   3
   0  -5   1  525.71   41.10   3
   0  -5   1  475.78   24.63   1
   0  -5  -1  531.63   25.14   1
   0  -5   1  536.09   29.62   4
   0  -5  -1  521.82   29.52   4
   0  -5  -1  510.25   41.06   3
  -1  -5  -1  619.13   37.73   4
   1  -5   1  675.17   51.55   3
   1  -5   1  676.65   37.62   4
  -1  -5  -1  671.04   32.38   1
  -1  -5  -1  679.57   52.18   3
  -2  -5  -1  971.76   73.33   3
  -2  -5  -1  909.58   53.44   4
   2  -5   1  929.72   72.32   3
  -2  -5  -1  947.27   46.06   1
   2  -5   1  974.68   53.02   4
  -2  -5  -1  973.36   54.04   2
  -3  -5  -1  619.60   48.82   3
   3  -5   1  618.40   47.74   3
  -3  -5  -1  638.27   36.08   2
  -3  -5  -1  589.17   36.09   4
   3  -5   1  637.03   35.15   4
  -3  -5  -1  599.82   30.67   1
  -4  -5  -1  265.61   16.16   1
  -4  -5  -1  313.33   19.56   2
  -4   5  -1  254.14   13.40   1
  -4  -5  -1  227.64   24.97   4
   4  -5   1  296.37   23.81   3
   5  -5   1  572.62   42.13   3
  -5  -5  -1  536.98   31.96   2
  -5  -5  -1  543.59   27.93   1
  -5   5  -1  522.00   26.14   1
  -5  -5  -1  486.84   37.24   4
   6  -5   1  520.36   40.59   3
  -6   5  -1  521.50   25.29   1
  -6  -5  -1  529.19   30.81   2
  -6  -5  -1  488.34   27.35   1
  -6  -5  -1  462.68   37.22   4
  -7  -5  -1   14.98   16.26   4
   7  -5   1   17.94   15.81   3
  -7   5  -1   13.17    6.32   1
  -7  -5  -1    7.44   13.11   1
  -7  -5  -1   20.35   10.95   2
  -8   5  -1  891.85   42.17   1
   8  -5   1  885.86   66.26   3
  -8  -5  -1  822.95   49.17   2
  -8  -5  -1  843.17   44.17   1
  -8  -5  -1  827.47   54.80   4
  -9   5  -1   -0.97    3.42   1
  -9  -5  -1   13.84   14.14   1
  -9  -5  -1   17.65   14.03   4
 -10  -5  -1   91.45   16.58   1
 -10   5  -1  101.08   11.25   1
  10  -5   1   62.48   21.17   3
 -11   5  -1    4.01   36.36   1
 -11  -5  -1    2.92    8.57   1
 -12   5  -1   20.28   13.81   1
 -12  -5  -1   28.79   18.16   1
 -13  -5  -1  207.24   22.21   1
 -13   5  -1  255.76   18.09   1
 -14  -5  -1  306.01   24.09   1
 -14   5  -1  263.63   34.14   2
 -15  -5  -1   22.81   18.09   1
 -16  -5  -1   59.80   21.33   1
 -16  -6   1  258.90   26.61   1
 -15  -6   1   19.58   20.17   1
 -14  -6   1    3.61   15.59   1
 -13  -6   1   23.56   13.95   1
  12  -6  -1  198.20   28.88   3
 -12  -6   1  239.15   19.03   1
 -12   6   1  227.02   15.91   1
 -11  -6   1   27.48   16.80   1
  11  -6  -1    1.70   12.71   3
 -11  -6   1   76.56   29.20   4
 -11   6   1    9.45   11.26   1
 -10  -6   1  595.74   44.53   4
 -10   6   1  652.56   30.95   1
 -10  -6   1  585.44   32.70   1
  10  -6  -1  569.29   49.50   3
  -9   6   1    0.04    0.66   1
  -9  -6   1    6.01   19.16   1
   9  -6  -1   -5.49   13.31   3
  -9  -6   1   23.91   18.86   4
  -8   6   1  173.66   11.66   1
   8  -6  -1  124.95   27.62   3
  -8  -6   1  165.55   17.98   1
  -8  -6   1  128.65   31.62   4
  -7   6   1    3.91    7.99   1
   7  -6  -1    3.14   15.94   3
  -7  -6   1    9.45   19.77   1
  -7  -6   1   -6.86    8.05   4
  -6   6   1  612.02   30.73   1
  -6  -6   1  577.46   42.84   4
  -6  -6   1  624.32   32.28   1
   6  -6  -1  680.72   49.81   3
   5  -6  -1   31.41   12.69   4
   5  -6  -1   32.36   17.70   3
  -5  -6   1   17.43   10.78   1
  -5   6   1   33.18    5.30   1
  -5  -6   1   46.70   14.78   4
   4  -6  -1 1304.17   71.28   4
  -4  -6   1 1329.43   62.20   1
   4  -6  -1 1308.59   97.74   3
  -4  -6   1 1194.62   71.87   4
   3  -6  -1    3.48    8.39   4
   3  -6  -1    7.15   11.53   3
  -3  -6   1    2.56    5.63   1
  -3  -6   1   23.78   13.84   3
  -2  -6   1   -2.61    9.74   4
   2  -6  -1    8.34   18.02   3
   2  -6  -1    0.98    4.60   4
  -2  -6   1    4.88    7.76   3
  -2  -6   1    4.72    4.60   1
  -1  -6   1   18.50    4.61   1
   1  -6  -1    7.80   36.83   3
  -1  -6   1   13.89   36.48   3
   1  -6  -1   17.23   10.99   4
  -1  -6   1   12.32   12.05   4
   0  -6  -1 1292.86   73.09   4
   0  -6   1 1343.28  100.29   3
   0  -6   1 1393.71   73.27   4
   0  -6  -1 1331.87   63.05   1
   0  -6  -1 1316.12  100.49   3
   0  -6   1 1252.46   62.64   1
  -1  -6  -1   11.96   16.07   4
  -1  -6  -1   10.27   20.76   3
   1  -6   1   24.24    9.54   4
  -1  -6  -1   11.52    7.89   1
  -2  -6  -1  301.63   15.88   1
   2  -6   1  317.95   19.62   4
  -2  -6  -1  319.33   28.64   3
  -2  -6  -1  281.78   20.64   4
   2  -6   1  265.73   25.01   3
  -3  -6  -1  174.67   15.77   2
  -3  -6  -1  153.79   11.63   1
   3  -6   1  183.14   14.70   4
  -3  -6  -1  158.92   18.18   4
   3  -6   1  166.42   19.59   3
  -3  -6  -1  180.71   23.53   3
  -4  -6  -1  172.06   11.93   1
  -4  -6  -1  126.20   25.13   4
   4  -6   1  175.63   17.52   3
  -4   6  -1  103.05    6.33   1
  -4  -6  -1  195.28   15.88   2
  -4  -6  -1  203.65   24.95   3
   5  -6   1  306.32   26.20   3
  -5  -6  -1  314.97   17.97   1
  -5   6  -1  258.59   14.16   1
  -5  -6  -1  277.05   30.10   4
  -5  -6  -1  301.85   21.21   2
   6  -6   1 1271.71   94.21   3
  -6  -6  -1 1113.97   72.99   4
  -6  -6  -1 1213.95   61.11   1
  -6   6  -1 1234.52   59.39   1
  -6  -6  -1 1325.19   70.61   2
  -7  -6  -1   -0.65    7.42   1
  -7  -6  -1    8.47   12.23   2
   7  -6   1    9.88   11.78   3
  -7  -6  -1    6.24   25.13   4
  -7   6  -1   11.30    7.22   1
   8  -6   1  419.20   35.20   3
  -8  -6  -1  383.08   36.43   4
  -8   6  -1  401.50   21.42   1
  -8  -6  -1  437.29   25.89   1
  -9  -6  -1   46.02   21.69   4
  -9  -6  -1    7.40   23.36   1
   9  -6   1   -0.05    3.58   3
  -9   6  -1    1.94   13.90   1
 -10  -6  -1  246.34   32.08   4
 -10  -6  -1  244.06   20.08   1
  10  -6   1  244.10   25.43   3
 -10   6  -1  258.07   16.10   1
 -11  -6  -1    8.27   50.80   1
 -12  -6  -1  186.03   20.34   1
 -13  -6  -1    8.18   24.33   1
 -14  -6  -1  120.68   22.95   1
 -15  -6  -1   29.03   22.80   1
 -16  -6  -1    6.10   24.24   1
 -16  -7   1   66.26   23.28   1
 -15  -7   1    7.42   18.87   1
 -14  -7   1   88.49   21.74   1
 -13  -7   1   20.66   23.38   1
 -12  -7   1   50.86   18.02   1
 -12  -7   1   92.58   32.35   4
 -11  -7   1   45.84   27.54   4
  11  -7  -1   24.17   17.17   3
 -11  -7   1    6.47   57.76   1
  10  -7  -1  266.49   27.16   3
 -10  -7   1  319.53   36.06   4
 -10  -7   1  285.55   19.19   1
  -9  -7   1   23.15   26.71   4
   9  -7  -1   36.41   16.66   3
  -9  -7   1   21.71   13.32   1
  -8   7   1 1573.85   74.94   1
  -8  -7   1 1520.64   76.39   1
  -8  -7   1 1553.85   90.01   4
   8  -7  -1 1575.19  118.37   3
  -7  -7   1  156.66   16.25   1
   7  -7  -1  143.90   23.46   3
  -7   7   1  120.03   10.11   1
   7  -7  -1  159.94   17.09   4
  -7  -7   1   97.41   34.64   4
   6  -7  -1  124.69   15.09   4
  -6  -7   1   46.21   36.55   4
  -6   7   1   90.26    8.26   1
  -6  -7   1  137.01   13.58   1
   6  -7  -1  124.17   20.78   3
   5  -7  -1   -3.66   20.06   4
  -5  -7   1   11.45   15.13   4
  -5  -7   1    1.55    5.14   1
   5  -7  -1    4.87   10.19   3
  -5   7   1    0.19    0.98   1
   4  -7  -1  498.83   29.72   4
   4  -7  -1  498.28   41.04   3
  -4  -7   1  515.25   25.19   1
  -4  -7   1  432.22   32.12   4
  -3  -7   1   -7.01   11.44   4
  -3  -7   1   32.08   21.38   3
  -3  -7   1    2.72    5.86   1
   3  -7  -1    0.71    4.96   4
   2  -7  -1 2237.81  120.03   4
  -2  -7   1 2366.11  164.97   3
  -2  -7   1 2048.73  120.29   4
  -2  -7   1 2322.48  103.95   1
   2  -7  -1 1929.82  164.05   3
  -1  -7   1    1.24   16.85   1
   1  -7  -1    5.20    9.74   4
  -1  -7   1    2.57   11.74   3
  -1  -7   1    1.68    5.72   4
   0  -7  -1  107.21   21.45   3
   0  -7   1   91.55   14.06   4
   0  -7  -1  111.40    7.03   1
   0  -7   1   91.96    5.11   1
   0  -7  -1  100.59   12.93   4
   0  -7   1  102.05   19.70   3
  -1  -7  -1    1.50    5.39   1
  -1  -7  -1   -2.44   14.02   3
   1  -7   1    5.80   12.36   4
   2  -7   1 1200.89   63.31   4
  -2  -7  -1  982.42   63.42   4
   2  -7   1 1101.89   86.21   3
  -2  -7  -1 1180.10   54.70   1
  -2  -7  -1 1180.10   87.44   3
  -3  -7  -1  174.40   25.74   3
   3  -7   1  142.65   15.34   4
  -3  -7  -1  126.96   11.76   1
   3  -7   1  130.43   19.56   3
  -3  -7  -1  127.07   18.41   4
   4  -7   1 1076.71   81.72   3
  -4  -7  -1 1020.03   60.81   4
   4  -7   1 1098.28   60.09   4
  -4  -7  -1 1067.78   52.34   1
  -4  -7  -1 1068.90   83.45   3
  -5  -7  -1   -7.22    9.00   2
   5  -7   1    4.33    6.83   4
  -5  -7  -1    5.58   12.10   1
   5  -7   1    5.41   11.22   3
  -6  -7  -1  370.67   25.51   2
  -6  -7  -1  296.83   38.17   4
   6  -7   1  361.38   24.33   4
  -6  -7  -1  309.23   21.89   1
   6  -7   1  363.44   31.87   3
  -7  -7  -1   24.84   26.73   4
   7  -7   1   20.22   21.02   3
  -7  -7  -1    1.12   11.98   2
  -7  -7  -1   20.27   13.83   1
  -8  -7  -1  225.20   33.89   4
   8  -7   1  245.31   25.34   3
  -8  -7  -1  245.95   18.92   1
  -9  -7  -1    8.04   12.70   1
  -9  -7  -1   47.76   23.85   4
   9  -7   1   -3.61   29.55   3
 -10  -7  -1  698.24   49.42   4
  10  -7   1  672.47   54.00   3
 -10  -7  -1  664.09   36.96   1
 -11  -7  -1   -8.23   18.64   1
 -12  -7  -1    7.05   17.77   1
 -13  -7  -1   10.69   34.84   1
 -14  -7  -1   96.22   23.91   1
 -15  -7  -1   56.41   20.16   1
 -15  -8   1   13.58   16.96   1
 -14  -8   1   46.71   21.14   1
 -13  -8   1   86.42   33.31   4
 -13  -8   1   61.90   18.81   1
 -12  -8   1   68.58   19.03   1
 -12  -8   1  153.66   31.71   4
 -11  -8   1   74.42   16.05   1
  11  -8  -1   87.61   21.75   3
 -11  -8   1  107.87   32.65   4
 -10  -8   1  105.58   16.23   1
  10  -8  -1  101.71   21.55   3
 -10  -8   1  135.85   35.79   4
   9  -8  -1   32.23   19.76   3
   9  -8  -1   33.66   15.11   4
  -9  -8   1   24.81   14.48   1
  -9  -8   1   26.00   32.79   4
   8  -8  -1   19.54   19.59   3
  -8  -8   1   26.89   13.54   1
  -8  -8   1   12.68   24.35   4
   8  -8  -1   27.02   12.72   4
   7  -8  -1   57.16   19.01   3
  -7  -8   1   22.37   49.24   4
  -7  -8   1   57.04   12.47   1
   7  -8  -1   58.96   15.05   4
  -6  -8   1  299.43   19.29   1
   6  -8  -1  277.28   31.54   3
  -6  -8   1  317.51   26.92   4
   6  -8  -1  317.79   23.03   4
   5  -8  -1   -0.49    1.46   3
  -5  -8   1   18.55   10.51   1
   5  -8  -1    7.72   21.45   4
  -5  -8   1    1.62   10.29   4
  -4  -8   1  838.86   38.84   1
   4  -8  -1  762.48   61.90   3
  -4  -8   1  755.21   46.91   4
   4  -8  -1  767.57   44.86   4
   3  -8  -1   -4.11   11.22   3
  -3  -8   1   37.07   25.37   3
   3  -8  -1   14.77   12.91   4
  -2  -8   1   21.22   22.50   4
   2  -8  -1    7.92   34.43   3
  -2  -8   1   28.65    6.92   1
   2  -8  -1   15.59   17.61   4
  -2  -8   1   30.97   24.24   3
  -1  -8   1   20.19    5.63   1
   1  -8  -1   16.42   14.59   4
  -1  -8   1   29.89   25.31   3
   1  -8  -1   -8.05    9.79   3
  -1  -8   1   21.38   14.15   4
   0  -8  -1  241.61   28.73   3
   0  -8  -1  257.01   19.80   4
   0  -8   1  259.13   19.91   4
   0  -8   1  250.54   28.59   3
  -1  -8  -1   -8.82    9.05   4
   1  -8   1    1.01   27.05   3
   1  -8   1    1.34   20.58   4
  -1  -8  -1   24.12   18.69   3
  -1  -8  -1   16.07    7.18   1
   2  -8   1  357.83   25.22   4
  -2  -8  -1  323.18   27.05   4
   2  -8   1  369.14   32.33   3
  -2  -8  -1  379.49   19.37   1
  -2  -8  -1  401.35   36.65   3
  -3  -8  -1   61.65   10.24   1
  -3  -8  -1   70.60   18.94   4
  -3  -8  -1   86.11   23.37   3
   3  -8   1   40.27   21.88   3
   3  -8   1   47.93   14.96   4
  -4  -8  -1  168.08   30.55   3
   4  -8   1  144.26   17.31   4
  -4  -8  -1  156.04   13.16   1
   4  -8   1  153.89   22.16   3
  -4  -8  -1  164.01   19.91   4
   5  -8   1   -3.63    8.64   3
  -5  -8  -1   22.35   11.94   1
   5  -8   1   34.14   15.81   4
  -6  -8  -1  621.48   45.99   4
   6  -8   1  652.82   50.69   3
  -6  -8  -1  623.58   33.18   1
   6  -8   1  632.08   37.78   4
   7  -8   1   23.27   13.36   4
  -7  -8  -1    7.08  141.48   4
  -7  -8  -1   26.22   15.59   1
   7  -8   1   38.61   17.31   3
   8  -8   1   95.95   15.12   4
   8  -8   1  129.41   19.63   3
  -8  -8  -1  113.98   15.90   1
  -8  -8  -1  145.92   30.75   4
  -9  -8  -1   14.27   12.34   1
   9  -8   1    9.58   29.71   3
  -9  -8  -1   38.78   23.71   4
 -10  -8  -1   20.42   19.98   1
 -10  -8  -1   84.97   32.30   4
 -11  -8  -1   15.37   18.08   1
 -11  -8  -1   54.08   31.28   4
 -12  -8  -1  127.13   19.20   1
 -13  -8  -1   30.07   18.28   1
 -14  -8  -1   36.59   21.08   1
 -15  -8  -1   18.99   25.76   1
 -15  -9   1   23.02   21.83   1
 -14  -9   1   38.74   18.11   1
 -13  -9   1   10.70   16.66   1
  13  -9  -1   11.86   16.06   4
 -13  -9   1   68.45   35.66   4
  12  -9  -1   35.94   16.76   4
 -12  -9   1   86.97   33.25   4
 -12  -9   1   26.28   16.21   1
  11  -9  -1    2.92   12.27   4
  11  -9  -1   12.55   21.58   3
 -11  -9   1   29.46   23.31   4
 -11  -9   1    6.28   13.20   1
 -10  -9   1   45.68   14.80   1
  10  -9  -1   61.47   16.67   4
  10  -9  -1   53.54   20.32   3
 -10  -9   1   35.60   30.81   4
  -9  -9   1  246.38   35.11   4
  -9  -9   1  257.27   18.99   1
   9  -9  -1  283.09   28.62   3
   9  -9  -1  304.10   21.69   4
  -8  -9   1  259.41   33.05   4
   8  -9  -1  260.00   27.14   3
  -8  -9   1  240.73   17.81   1
   8  -9  -1  282.94   20.66   4
   7  -9  -1  167.58   16.28   4
   7  -9  -1  148.49   22.10   3
  -7  -9   1  164.09   14.07   1
  -7  -9   1  103.15   29.36   4
  -6  -9   1  593.34   39.50   4
   6  -9  -1  621.28   49.29   3
  -6  -9   1  616.77   31.35   1
   6  -9  -1  593.04   36.04   4
  -5  -9   1   65.43   20.98   4
   5  -9  -1   54.25   22.20   3
  -5  -9   1   80.13   11.11   1
   5  -9  -1   68.12   15.28   4
   4  -9  -1    5.20   26.04   4
   4  -9  -1   14.69   21.10   3
  -4  -9   1   23.10    9.00   1
  -4  -9   1   19.94   17.96   4
  -3  -9   1  110.85   31.19   3
   3  -9  -1   42.15   24.71   3
  -3  -9   1   44.63   26.79   4
   3  -9  -1   70.84   17.36   4
  -3  -9   1   73.98    9.02   1
  -2  -9   1  174.86   10.78   1
  -2  -9   1  130.13   22.02   4
   2  -9  -1  118.55   27.60   3
   2  -9  -1  153.02   18.32   4
  -2  -9   1  225.53   29.87   3
   1  -9  -1   59.31   17.06   4
  -1  -9   1   52.43   23.15   3
   1  -9  -1   27.54   27.57   3
  -1  -9   1   52.89   17.22   4
   0  -9  -1   24.57   14.59   4
   0  -9  -1    4.87   33.22   3
   0  -9   1   19.27   14.06   4
   0  -9   1   -1.26    5.15   3
  -1  -9  -1  495.64   33.31   4
   1  -9   1  499.12   32.34   4
  -1  -9  -1  549.53   25.49   1
  -1  -9  -1  524.64   45.58   3
   1  -9   1  458.38   42.98   3
   2  -9   1   75.67   17.81   4
  -2  -9  -1  102.85   29.04   3
  -2  -9  -1   98.78   10.17   1
   2  -9   1   85.12   19.90   3
  -2  -9  -1   87.15   20.65   4
   3  -9   1  215.78   27.65   3
  -3  -9  -1  231.96   14.68   1
  -3  -9  -1  184.82   22.28   4
  -3  -9  -1  233.38   32.56   3
   3  -9   1  216.10   20.38   4
  -4  -9  -1  624.13   31.79   1
   4  -9   1  599.66   37.69   4
  -4  -9  -1  726.50   55.71   3
   4  -9   1  579.43   50.33   3
  -4  -9  -1  625.80   39.88   4
   5  -9   1  721.74   41.20   4
  -5  -9  -1  712.06   35.76   1
   5  -9   1  689.03   55.44   3
  -5  -9  -1  665.29   45.39   4
  -6  -9  -1    9.78   79.76   4
  -6  -9  -1    8.06   37.44   1
   6  -9   1   11.39   17.93   3
   6  -9   1   16.32   12.59   4
   7  -9   1   31.00   19.39   3
   7  -9   1   43.77   15.04   4
  -7  -9  -1   37.80   13.48   1
  -7  -9  -1   40.50   32.69   4
  -8  -9  -1   45.22   17.94   1
   8  -9   1   57.82   20.38   3
   8  -9   1   64.76   15.88   4
  -8  -9  -1   59.41   28.92   4
  -9  -9  -1   83.14   15.91   1
   9  -9   1   88.83   22.36   3
   9  -9   1   79.54   16.31   4
  -9  -9  -1  113.92   29.70   4
 -10  -9  -1   33.60   27.71   4
  10  -9   1   19.47   17.03   4
 -10  -9  -1   13.02   14.77   1
 -11  -9  -1   -7.30   16.21   1
  11  -9   1   36.72   16.38   4
 -11  -9  -1   60.28   28.26   4
 -12  -9  -1   16.35   20.21   1
 -12  -9  -1   58.48   31.03   4
 -13  -9  -1   -1.86   10.02   1
 -14  -9  -1  232.58   26.41   1
 -14 -10   1    4.56   31.99   1
 -13 -10   1   85.64   33.76   4
 -13 -10   1   23.85   14.54   1
  13 -10  -1   13.20   18.02   4
 -12 -10   1  129.49   34.00   4
  12 -10  -1  119.43   19.30   4
 -12 -10   1   70.61   17.28   1
 -11 -10   1   35.25   32.66   4
  11 -10  -1   25.97   18.88   4
  11 -10  -1   29.06   22.43   3
 -11 -10   1   12.79   11.51   1
 -10 -10   1   87.29   35.91   4
  10 -10  -1   40.83   22.78   3
 -10 -10   1   30.03   14.07   1
  10 -10  -1   60.48   16.68   4
  -9 -10   1   29.50   12.95   1
   9 -10  -1    6.24   16.92   4
   9 -10  -1   21.52   20.78   3
  -9 -10   1   54.31   27.06   4
   8 -10  -1   14.06   19.47   3
   8 -10  -1    8.29   14.37   4
  -8 -10   1    5.51   18.69   1
  -8 -10   1    3.89   72.28   4
  -7 -10   1  305.55   34.85   4
  -7 -10   1  363.73   20.67   1
   7 -10  -1  340.96   32.39   3
   7 -10  -1  357.22   24.62   4
  -6 -10   1 1012.44   48.48   1
   6 -10  -1  918.03   76.12   3
  -6 -10   1  971.13   57.07   4
   6 -10  -1  990.41   55.83   4
  -5 -10   1  183.36   21.12   4
   5 -10  -1  174.69   24.27   3
  -5 -10   1  207.83   13.21   1
   5 -10  -1  159.88   17.30   4
  -4 -10   1   45.98   19.52   4
   4 -10  -1   31.02   22.02   3
   4 -10  -1   30.35   14.53   4
  -4 -10   1   35.42    9.55   1
   3 -10  -1  173.40   17.98   4
  -3 -10   1  190.78   32.02   3
  -3 -10   1  170.14   22.98   4
   3 -10  -1  139.19   27.25   3
  -2 -10   1   -6.84   11.49   4
   2 -10  -1   13.11   15.94   4
  -2 -10   1   13.55   23.89   3
   1 -10  -1  141.37   17.78   4
  -1 -10   1  165.55   28.86   3
   1 -10  -1  146.01   28.41   3
  -1 -10   1  148.79   18.50   4
   0 -10  -1  953.74   55.98   4
   0 -10   1  976.12   76.12   3
   0 -10   1  939.95   55.62   4
   0 -10  -1 1000.46   76.51   3
   1 -10   1  865.79   50.98   4
  -1 -10  -1  920.92   70.80   3
  -1 -10  -1  865.60   51.46   4
   1 -10   1  877.33   69.55   3
  -2 -10  -1  210.58   22.21   4
   2 -10   1  212.31   19.73   4
  -2 -10  -1  216.43   29.87   3
   2 -10   1  197.09   25.47   3
  -2 -10  -1  224.89   13.62   1
  -3 -10  -1   75.42   25.81   3
  -3 -10  -1   38.39    9.44   1
  -3 -10  -1   54.04   16.17   4
   3 -10   1   43.02   15.15   4
   3 -10   1   33.07   22.76   3
  -4 -10  -1   36.51   18.27   4
   4 -10   1   13.24   25.72   3
  -4 -10  -1   21.67   25.04   3
   4 -10   1    5.52   13.60   4
  -4 -10  -1   12.46   10.49   1
  -5 -10  -1   86.48   26.74   4
   5 -10   1   94.73   16.27   4
   5 -10   1   93.54   19.81   3
  -5 -10  -1   92.90   12.55   1
   6 -10   1  282.88   21.34   4
   6 -10   1  265.86   27.45   3
  -6 -10  -1  285.10   18.26   1
  -6 -10  -1  252.70   33.65   4
  -7 -10  -1  348.23   20.88   1
  -7 -10  -1  395.15   38.27   4
   7 -10   1  349.88   24.67   4
   7 -10   1  328.38   32.32   3
   8 -10   1  110.31   17.80   4
   8 -10   1  105.13   21.55   3
  -8 -10  -1   82.49   15.97   1
  -8 -10  -1  104.64   32.12   4
  -9 -10  -1   40.00   33.52   4
   9 -10   1   -2.40   17.95   3
  -9 -10  -1   -5.46   15.44   1
   9 -10   1   15.56   18.31   4
 -10 -10  -1   25.05   27.72   4
 -10 -10  -1   -0.28    6.00   1
  10 -10   1    9.00   14.74   4
 -11 -10  -1   45.21   18.54   1
 -11 -10  -1   75.85   32.81   4
  11 -10   1   84.08   20.08   4
 -12 -10  -1  136.77   35.72   4
 -12 -10  -1  106.74   19.32   1
  12 -10   1  102.75   21.93   4
 -13 -10  -1  201.02   21.87   1
  13 -10   1  170.70   23.80   4
 -14 -10  -1   90.27   23.25   1
  14 -10   1   79.56   21.95   4
 -14 -11   1  112.82   21.09   1
 -13 -11   1   74.07   31.71   4
 -13 -11   1    2.18   10.17   1
 -12 -11   1   70.74   31.36   4
  12 -11  -1   34.61   20.42   4
 -12 -11   1   21.64   14.40   1
  11 -11  -1    8.38   20.83   4
 -11 -11   1    5.64   12.30   4
 -11 -11   1   16.92   18.20   1
 -10 -11   1   81.45   14.16   1
  10 -11  -1   85.80   18.84   4
  10 -11  -1   76.17   26.40   3
 -10 -11   1  112.56   34.23   4
  -9 -11   1  121.65   33.10   4
   9 -11  -1  118.33   16.69   4
   9 -11  -1  127.08   24.76   3
  -9 -11   1   97.04   15.04   1
   8 -11  -1   68.50   16.74   4
  -8 -11   1   63.69   32.97   4
   8 -11  -1   99.47   23.13   3
  -8 -11   1   68.45   13.97   1
  -7 -11   1  202.76   32.05   4
   7 -11  -1  200.08   19.50   4
  -7 -11   1  228.83   15.90   1
   7 -11  -1  206.58   26.68   3
   6 -11  -1   16.77   17.50   3
  -6 -11   1   47.75   18.61   4
   6 -11  -1   24.30   15.59   4
   5 -11  -1   56.62   22.29   3
   5 -11  -1   76.31   15.97   4
  -5 -11   1  133.08   20.31   4
   4 -11  -1  184.23   26.47   3
   4 -11  -1  183.55   19.30   4
  -4 -11   1  221.22   23.00   4
  -3 -11   1  114.13   21.09   4
  -3 -11   1  126.27   28.02   3
   3 -11  -1   81.10   25.71   3
   3 -11  -1   94.24   15.39   4
  -2 -11   1  365.13   27.62   4
  -2 -11   1  427.55   38.45   3
   2 -11  -1  342.24   35.61   3
   2 -11  -1  388.22   25.75   4
   1 -11  -1   22.02   20.20   3
  -1 -11   1   -5.41   14.10   4
  -1 -11   1   20.55   18.15   3
   1 -11  -1    7.02   16.30   4
   0 -11   1   40.43   16.05   4
   0 -11   1   37.76   17.37   3
   0 -11  -1   26.29   20.36   4
   0 -11  -1   33.50   24.83   3
   1 -11   1   98.86   24.15   3
  -1 -11  -1  132.08   25.22   3
   1 -11   1  121.19   17.18   4
  -1 -11  -1  100.31   19.85   4
   2 -11   1   46.48   21.75   3
  -2 -11  -1   59.83   24.79   3
   2 -11   1   56.01   17.65   4
  -2 -11  -1   40.44   20.29   4
  -3 -11  -1  277.87   31.24   3
   3 -11   1  226.68   19.85   4
   3 -11   1  232.91   27.45   3
  -3 -11  -1  261.84   23.82   4
  -4 -11  -1  556.06   35.10   4
  -4 -11  -1  596.95   49.40   3
   4 -11   1  505.47   43.25   3
   4 -11   1  461.68   32.72   4
  -5 -11  -1   86.80   13.37   1
  -5 -11  -1   78.32   24.78   4
   5 -11   1   69.37   19.97   3
   5 -11   1   64.80   16.70   4
   6 -11   1   21.51   18.06   3
  -6 -11  -1    5.91   11.25   1
   6 -11   1   -1.69    9.95   4
   7 -11   1    2.42   13.19   3
   7 -11   1   13.43   18.99   4
  -7 -11  -1    0.08    0.87   1
  -8 -11  -1   68.42   30.03   4
   8 -11   1   79.57   16.41   4
  -8 -11  -1   70.05   15.42   1
   8 -11   1   76.64   22.38   3
   9 -11   1   -1.80   23.48   3
   9 -11   1   12.49   18.56   4
  -9 -11  -1   28.48   20.96   4
  -9 -11  -1    5.50   29.98   1
 -10 -11  -1  198.37   20.50   1
  10 -11   1  283.81   23.77   4
 -10 -11  -1  297.01   37.92   4
 -11 -11  -1   -6.00   11.44   1
  11 -11   1   -0.66   26.06   4
 -11 -11  -1   61.14   31.53   4
  12 -11   1   12.41   18.19   4
 -12 -11  -1   -4.77   15.36   1
 -12 -11  -1   51.08   38.49   4
  13 -11   1   59.28   24.00   4
 -13 -11  -1   40.06   20.42   1
  14 -11   1    1.98  694.34   4
 -13 -12   1    5.38  122.16   1
 -12 -12   1   55.83   32.78   4
 -12 -12   1   12.98   16.84   1
 -11 -12   1  104.63   32.39   4
  10 -12  -1   57.67   19.23   4
 -10 -12   1   92.32   32.96   4
  10 -12  -1   84.65   26.43   3
   9 -12  -1   -1.80    8.75   4
   9 -12  -1    7.89   23.50   3
  -9 -12   1   -1.72    4.96   4
   8 -12  -1    7.75   25.79   4
   8 -12  -1    1.89   18.73   3
   7 -12  -1    9.90   14.55   4
   7 -12  -1   -0.83    5.86   3
  -6 -12   1   37.07   19.71   4
   6 -12  -1   -3.84   34.37   4
   6 -12  -1    0.42    4.08   3
  -5 -12   1  141.66   20.69   4
   5 -12  -1   91.44   23.51   3
   5 -12  -1  113.52   17.50   4
   4 -12  -1   15.73   20.71   3
  -4 -12   1   25.21   16.10   4
   4 -12  -1   32.63   14.60   4
   3 -12  -1   59.74   16.87   4
   3 -12  -1   60.25   22.66   3
  -3 -12   1   57.66   20.97   4
   2 -12  -1   16.79   28.25   3
  -2 -12   1   28.82   18.38   4
  -2 -12   1   23.76   22.01   3
   2 -12  -1   40.68   15.37   4
  -1 -12   1   10.54   19.29   3
   1 -12  -1   16.89   19.14   4
   1 -12  -1    7.00   16.89   3
   0 -12   1   15.03   10.66   4
   0 -12  -1   -2.21   10.14   3
   0 -12   1   14.51   23.44   3
   0 -12  -1   -7.38   11.15   4
  -1 -12  -1   56.68   18.96   4
  -1 -12  -1   61.94   24.97   3
   1 -12   1   52.21   17.08   4
   1 -12   1   38.82   23.28   3
  -2 -12  -1   57.49   19.51   4
   2 -12   1  110.40   16.97   4
  -2 -12  -1   76.29   25.14   3
   2 -12   1   87.04   22.29   3
  -3 -12  -1   28.25   26.70   3
   3 -12   1    5.74   20.66   4
  -3 -12  -1   15.29   15.13   4
   3 -12   1    7.45   14.96   3
  -4 -12  -1   29.59   16.04   4
   4 -12   1    1.86   29.73   3
   4 -12   1   -5.38   12.75   4
  -5 -12  -1  273.61   28.91   4
   5 -12   1  237.13   21.94   4
   5 -12   1  282.45   28.35   3
   6 -12   1   15.70   22.60   3
   6 -12   1    2.29   17.66   4
   7 -12   1   59.42   17.98   4
  -7 -12  -1   37.41   33.78   4
   7 -12   1   60.37   23.00   3
  -8 -12  -1   31.03   28.39   4
   8 -12   1   30.61   18.82   4
   8 -12   1    5.12   41.50   3
  -9 -12  -1    2.95   10.55   4
   9 -12   1    2.43   17.24   4
 -10 -12  -1   32.87   25.72   4
  10 -12   1    9.59   23.99   4
 -10 -12  -1    4.00   11.39   1
 -11 -12  -1  176.71   34.28   4
  11 -12   1   86.36   21.42   4
 -11 -12  -1   79.59   17.19   1
  12 -12   1   37.61   23.61   4
 -12 -12  -1   47.01   18.67   1
 -13 -12  -1   30.45   20.24   1
  13 -12   1   10.81   26.75   4
 -11 -13   1   25.63   30.16   4
  10 -13  -1   -1.76   14.73   3
 -10 -13   1   20.96   27.96   4
   9 -13  -1  152.10   20.76   4
  -9 -13   1  198.62   36.86   4
   9 -13  -1  155.97   30.10   3
   8 -13  -1   -4.79   13.70   4
   7 -13  -1   98.86   25.34   3
  -7 -13   1   76.87   35.46   4
   7 -13  -1   60.03   18.89   4
   6 -13  -1   13.86   33.65   3
  -6 -13   1   48.50   20.91   4
  -5 -13   1   42.75   18.49   4
   5 -13  -1   31.82   16.82   4
   5 -13  -1   23.41   30.50   3
  -4 -13   1   21.74   20.38   4
   4 -13  -1   27.48   17.13   4
   4 -13  -1   15.61   32.19   3
   3 -13  -1  239.79   21.31   4
   3 -13  -1  262.33   30.08   3
  -3 -13   1  245.53   24.18   4
   2 -13  -1   10.50   28.60   3
   2 -13  -1   17.47   17.91   4
  -2 -13   1   24.38   19.74   3
  -2 -13   1   10.32   33.06   4
  -1 -13   1  136.97   25.28   3
  -1 -13   1   83.08   21.74   4
   1 -13  -1   88.48   21.66   4
   1 -13  -1  119.48   27.77   3
   0 -13   1   41.62   18.81   4
   0 -13   1   43.11   21.69   3
   0 -13  -1   37.88   25.37   3
   0 -13  -1   11.40   16.93   4
  -1 -13  -1   29.20   17.84   4
   1 -13   1   21.44   24.64   3
   1 -13   1   41.79   16.58   4
  -1 -13  -1   25.84   26.24   3
  -2 -13  -1   36.43   18.53   4
   2 -13   1   14.51   18.56   3
  -2 -13  -1    4.57   80.36   3
   2 -13   1   17.44   18.94   4
   3 -13   1  278.14   23.21   4
  -3 -13  -1  313.62   35.45   3
  -3 -13  -1  285.97   24.76   4
   3 -13   1  260.29   29.82   3
  -4 -13  -1   80.75   20.12   4
   4 -13   1   48.67   21.30   3
   4 -13   1   65.37   17.41   4
   5 -13   1  127.68   20.07   4
   5 -13   1  109.69   24.49   3
  -5 -13  -1  155.94   27.01   4
   6 -13   1   -7.89   17.57   4
   6 -13   1   15.31   20.22   3
   7 -13   1    6.38   39.61   3
   7 -13   1    5.11   56.84   4
  -7 -13  -1   -0.17    2.73   4
   8 -13   1   52.29   20.16   4
  -8 -13  -1  133.31   32.62   4
   8 -13   1   94.95   26.88   3
   9 -13   1   90.98   20.92   4
  -9 -13  -1  116.59   36.07   4
  10 -13   1   12.35   31.58   4
 -10 -13  -1   50.72   32.72   4
  11 -13   1   60.98   24.02   4
   9 -14  -1   56.29   29.67   3
  -9 -14   1   72.78   33.38   4
   8 -14  -1    0.68    8.28   4
   8 -14  -1   23.29   21.51   3
  -8 -14   1   17.41   24.57   4
   7 -14  -1   30.14   20.40   4
  -7 -14   1    1.38   10.81   4
   7 -14  -1   35.01   26.89   3
   6 -14  -1   20.77   25.52   3
   6 -14  -1    6.81   57.34   4
  -6 -14   1   45.77   23.43   4
   5 -14  -1  201.07   28.99   3
  -5 -14   1  213.96   25.75   4
   5 -14  -1  221.97   22.27   4
  -4 -14   1    5.40   17.53   4
   4 -14  -1    5.15   64.67   3
   4 -14  -1    7.28   35.74   4
   3 -14  -1   11.39   24.97   3
   3 -14  -1    5.56   19.13   4
  -3 -14   1    6.02   22.25   4
  -1 -14   1   98.35   22.36   4
   1 -14  -1   94.74   23.65   4
   1 -14  -1   71.25   29.34   3
  -1 -14   1  127.55   26.38   3
   0 -14  -1    8.72   29.84   4
   0 -14   1   11.01   19.32   3
   0 -14  -1   23.15   24.54   3
  -1 -14  -1  173.76   23.75   4
   1 -14   1  189.03   21.16   4
   1 -14   1  196.26   28.81   3
  -1 -14  -1  203.36   31.07   3
   2 -14   1   28.93   23.60   3
   2 -14   1   28.57   16.98   4
  -2 -14  -1   38.65   24.43   3
   3 -14   1    5.59   16.76   4
  -3 -14  -1   55.46   29.75   3
  -3 -14  -1   26.89   17.42   4
   3 -14   1   19.53   23.92   3
   4 -14   1   -3.96   19.94   4
  -4 -14  -1   20.67   21.31   4
   4 -14   1   20.80   21.34   3
   5 -14   1   21.23   18.29   4
   5 -14   1   19.09   34.94   3
  -5 -14  -1   -9.25   11.02   4
   6 -14   1   -6.84   15.47   4
   6 -14   1    8.29   32.07   3
   7 -14   1  210.52   29.57   3
   7 -14   1  188.77   23.50   4
  -7 -14  -1  188.44   36.25   4
  -8 -14  -1   -9.88   48.40   4
  -9 -14  -1   16.27   43.91   4
   9 -14   1   11.12   19.36   4
   9 -15  -1   33.66   31.08   3
  -8 -15   1    2.87  253.90   4
   7 -15  -1   16.62   27.03   3
   6 -15  -1    5.90   24.09   3
   6 -15  -1    2.06   12.57   4
   5 -15  -1   43.31   18.87   4
   5 -15  -1   46.49   27.54   3
  -5 -15   1   71.70   24.67   4
   4 -15  -1   15.61   23.59   3
   4 -15  -1    9.89   19.49   4
  -3 -15   1   74.88   27.10   4
   3 -15  -1   49.22   22.67   4
   3 -15  -1   94.77   27.56   3
  -2 -15   1   -3.04   10.03   4
   2 -15  -1    2.99   17.58   3
  -1 -15   1  158.85   32.13   3
   1 -15  -1  157.45   31.75   3
   1 -15  -1  110.38   24.32   4
  -1 -15   1  108.54   26.23   4
   0 -15   1   18.22   18.71   3
   0 -15  -1    5.95   15.02   3
  -1 -15  -1   -8.38   15.73   4
   1 -15   1   -0.80   13.54   3
  -1 -15  -1   12.97   25.39   3
  -2 -15  -1   37.56   20.45   4
  -2 -15  -1   25.20   31.27   3
   2 -15   1   -2.41  367.61   4
  -3 -15  -1   61.04   21.73   4
   3 -15   1   22.79   25.67   3
   3 -15   1   41.09   22.64   4
  -4 -15  -1   42.07   18.66   4
   4 -15   1   15.13   17.30   4
   4 -15   1   19.35   25.34   3
   5 -15   1    9.58   18.41   3
   5 -15   1    6.40   19.67   4
   6 -15   1    7.51   21.36   4
   6 -15   1   19.59   21.08   3
  -6 -15  -1   18.08   41.43   4
  -7 -15  -1   21.53   67.92   4
   7 -15   1    8.45   20.81   4
   7 -15   1   25.33   21.69   3
   8 -15   1   -4.12   10.62   4
   9 -15   1   30.29   24.63   4
   6 -16  -1   31.86   25.28   3
  -5 -16   1   40.54   23.60   4
   5 -16  -1   59.60   20.70   4
   5 -16  -1   40.92   24.99   3
  -4 -16   1   42.97   21.93   4
   4 -16  -1    7.05   18.36   3
  -3 -16   1   11.92   18.37   4
   2 -16  -1   -4.71   22.28   3
  -2 -16   1    0.96    6.11   4
  -1 -16   1   14.52   30.27   4
   1 -16  -1   42.98   23.80   4
   1 -16  -1   26.91   24.13   3
   0 -16   1   -6.21   58.04   4
   0 -16  -1   27.86   31.85   3
   0 -16  -1    3.06   17.89   4
   0 -16   1   39.88   27.44   3
   1 -16   1   40.43   24.25   4
   1 -16   1   55.50   27.82   3
  -1 -16  -1   61.12   33.43   3
  -1 -16  -1   55.63   24.82   4
   2 -16   1   33.40   23.93   3
  -2 -16  -1   18.74   18.29   4
   3 -16   1   16.45   20.40   4
  -3 -16  -1   27.23   23.33   4
   3 -16   1   16.35   24.57   3
   4 -16   1   18.77   21.89   4
   4 -16   1    8.71   26.09   3
   5 -16   1   47.70   21.09   4
   5 -16   1   23.15   28.28   3
  -5 -16  -1   -4.83   11.50   4
   6 -16   1   42.37   30.88   3
   6 -16   1   12.82   23.63   4
   7 -16   1   59.73   26.23   4
   7 -16   1   32.56   31.50   3
   3 -17  -1  138.21   28.89   4
   2 -17  -1   33.69   29.62   4
   1 -17  -1   62.98   25.94   4
  -1 -17   1   59.08   25.86   4
   0 -17   1   18.43   32.93   4
   0 -17  -1   21.54   24.83   4
   1 -17   1   -5.48   12.88   4
  -2 -17  -1   19.12   33.15   4
 -18   0   2   63.92   23.65   1
 -17   0   2   -1.52   15.87   1
 -16   0   2  136.48   17.74   1
 -15   0   2   12.24   10.14   1
  14   0  -2  105.74   33.68   3
 -14   0   2   37.48   16.69   1
  13   0  -2  105.03   30.46   3
 -12   0   2  329.36   20.89   1
  12   0  -2  398.29   38.76   3
 -11   0   2    9.01    7.95   1
 -10   0   2    1.22    3.60   1
  -9   0   2    4.47   10.25   1
  -8   0   2   30.39   10.73   1
  -7   0   2    2.49    3.88   1
  -6   0   2 9999.24  489.87   1
  -5   0   2    1.84   12.02   1
  -4   0   2  284.12   15.54   1
  -3   0   2   21.40    6.46   4
  -1   0  -2   -3.91    3.53   1
  -2   0  -2  284.44   19.38   2
  -2   0  -2  270.37   14.76   1
  -3   0  -2   -3.62  154.72   2
  -3   0  -2    1.26    7.38   1
  -4   0  -2  461.41   26.93   2
  -4   0  -2  432.53   22.53   1
  -5   0  -2   -1.42    9.13   1
  -5   0  -2   -6.59    7.69   2
  -6   0  -2 4168.65  236.12   2
  -6   0  -2 4340.80  202.41   1
  -7   0  -2    4.88   16.51   2
  -7   0  -2   10.54   11.59   1
  -8   0  -2 2270.19  108.46   1
  -8   0  -2 2239.27  126.47   2
  -9   0  -2   22.20   27.38   2
  -9   0  -2    4.25   10.40   1
 -10   0  -2   23.64   12.85   1
 -10   0  -2   61.64   24.39   2
  10   0   2  140.26   25.45   3
 -11   0  -2   29.50   17.87   2
 -11   0  -2    5.25   14.81   1
 -12   0  -2   17.16   13.04   1
 -13   0  -2   -4.65   15.41   1
 -14   0  -2  206.07   18.22   1
 -15   0  -2   -3.12   10.33   1
 -16   0  -2   15.40   15.35   1
 -18  -1   2   63.76   20.58   1
 -18   1   2   85.79   19.47   1
 -17  -1   2    4.86   17.78   1
 -17   1   2   -1.42   15.82   1
 -16  -1   2   56.23   18.76   1
 -16   1   2   46.15   16.74   1
 -15  -1   2    4.12   16.98   1
 -15   1   2   14.87   11.42   1
 -14  -1   2  312.40   21.70   1
  14  -1  -2  350.97   47.69   3
 -14   1   2  337.35   21.19   1
 -13   1   2   21.97   12.07   1
 -13  -1   2   56.45   15.09   1
  13  -1  -2   61.49   35.39   3
 -12   1   2  672.77   34.51   1
 -12  -1   2  616.13   34.63   1
  12  -1  -2  711.58   58.75   3
 -11  -1   2   27.01   12.67   1
  11  -1  -2  112.63   32.46   3
 -11   1   2   14.51   10.41   1
 -10  -1   2   57.49   16.33   2
 -10   1   2   35.06   13.00   1
 -10  -1   2   36.76   15.01   1
  10  -1  -2  145.64   26.26   3
  -9  -1   2   18.78   11.46   2
  -9   1   2   24.21    9.61   1
  -9  -1   2   18.43   11.20   1
  -8   1   2  349.80   19.72   1
   8  -1  -2  456.99   35.32   3
  -8  -1   2  332.05   22.71   2
  -8  -1   2  376.41   20.24   1
   7  -1  -2   93.33   18.66   3
  -7  -1   2   -7.63    4.49   2
  -7   1   2    9.64    7.02   1
  -7  -1   2    2.65   11.19   1
  -6  -1   2  678.14   38.67   4
  -6  -1   2  677.37   33.32   1
   6  -1  -2  684.14   53.28   3
  -6   1   2  640.76   32.96   1
  -5   1   2  868.16   42.00   1
   5  -1  -2  855.31   66.26   3
  -5  -1   2  809.98   42.08   1
  -5  -1   2  924.84   48.56   4
  -4  -1   2  715.33   36.34   1
  -4  -1   2  843.49   42.41   4
  -4   1   2  699.73   36.19   1
   4  -1  -2  739.34   57.14   3
  -3  -1   2  646.38   34.38   4
   3  -1  -2  644.94   46.54   3
  -3  -1   2  518.39   29.26   1
  -2  -1   2 6587.47  359.72   4
   2  -1  -2 6397.53  365.48   2
  -1  -1  -2 1013.15   59.68   2
  -1   1  -2 1112.20   50.86   1
  -2   1  -2 2857.95  122.15   1
  -2  -1  -2 2411.15  191.21   3
  -2  -1  -2 2356.14  122.29   1
  -2  -1  -2 2664.11  142.87   2
  -3  -1  -2  587.44   33.45   2
  -3  -1  -2  555.59   28.42   1
   3  -1   2  568.62   43.21   3
  -3   1  -2  595.40   28.10   1
   4  -1   2 1636.09  116.43   3
  -4   1  -2 1605.48   74.67   1
  -4  -1  -2 1498.63   74.92   1
  -4  -1  -2 1496.84   87.27   2
  -5  -1  -2    9.04    9.98   2
  -5  -1  -2   12.39    6.52   1
   5  -1   2   -9.37    8.36   3
  -5   1  -2   11.35    7.79   1
  -6   1  -2  134.04   10.56   1
  -6  -1  -2  148.47   17.56   2
   6  -1   2  129.52   19.07   3
  -6   1  -2  105.44   17.20   2
  -6  -1  -2  139.63   11.80   1
  -7  -1  -2  145.23   19.17   2
   7  -1   2  125.16   22.04   3
  -7   1  -2  123.74   19.23   2
  -7   1  -2  150.76   10.90   1
  -7  -1  -2  143.52   12.33   1
   8  -1   2  570.70   46.74   3
  -8  -1  -2  538.85   37.86   2
  -8   1  -2  534.97   37.15   2
  -8   1  -2  609.55   29.27   1
  -8  -1  -2  577.91   29.95   1
  -9  -1  -2   60.07   19.04   2
  -9   1  -2   16.47   26.82   2
  -9  -1  -2   13.72   13.82   1
  -9   1  -2   14.67    9.55   1
 -10  -1  -2  478.24   33.00   2
 -10   1  -2  418.49   32.71   2
 -10   1  -2  399.13   23.42   1
 -10  -1  -2  464.84   24.68   1
 -11   1  -2   51.88   19.46   2
 -11  -1  -2   12.16   10.23   1
 -11  -1  -2   37.40   17.37   2
 -11   1  -2    8.22   10.89   1
 -12  -1  -2   27.69   15.69   1
 -12   1  -2   19.67   12.29   1
 -12   1  -2   64.02   23.14   2
 -13  -1  -2   17.96   14.20   1
 -13   1  -2   19.58   13.88   1
 -14   1  -2   76.29   15.80   1
 -14  -1  -2   82.31   16.31   1
 -15  -1  -2    7.68   15.91   1
 -15   1  -2   -0.78    4.43   1
 -16   1  -2  142.64   17.86   1
 -16  -1  -2  109.36   18.05   1
 -17   1  -2   -3.98  122.80   1
 -17  -1  -2   -2.70   20.71   1
 -18   2   2    6.08   17.81   1
 -18  -2   2   16.11   20.14   1
 -17   2   2   33.55   18.85   1
 -17  -2   2   38.78   23.63   1
 -16  -2   2  110.83   19.18   1
 -16   2   2   86.19   16.96   1
 -15   2   2   38.96   14.34   1
 -15  -2   2   50.27   18.20   1
 -14   2   2  139.03   15.75   1
 -14  -2   2  101.10   18.58   1
 -13   2   2    2.34   10.30   1
 -13  -2   2    5.31   22.61   1
 -12  -2   2    7.23   11.30   1
 -12   2   2    4.80   13.20   1
 -11  -2   2   29.02   12.26   1
 -11   2   2   27.89   12.58   1
  11  -2  -2   35.94   41.53   3
  10  -2  -2  706.36   59.58   3
 -10   2   2  613.27   32.88   1
 -10  -2   2  643.93   33.93   1
  -9  -2   2    4.59   28.18   1
   9  -2  -2   40.28   31.89   3
  -9   2   2   27.80    9.87   1
  -9  -2   2   20.01    9.66   2
  -8  -2   2    4.87    7.17   2
  -8   2   2    1.01   14.43   1
  -8  -2   2   35.70   17.54   4
   8  -2  -2   -6.67   52.58   3
  -8  -2   2    3.04    9.68   1
  -7  -2   2  339.15   24.15   4
  -7   2   2  327.27   17.97   1
  -7  -2   2  356.37   18.90   1
   7  -2  -2  345.64   34.88   3
  -7  -2   2  316.78   19.47   2
   6  -2  -2   80.12   22.34   3
  -6   2   2   83.29    9.28   1
  -6  -2   2  110.53   16.69   4
  -6  -2   2   88.43   11.35   1
   5  -2  -2  311.31   29.10   3
  -5  -2   2  298.87   16.77   1
  -5   2   2  289.63   15.82   1
  -5  -2   2  297.08   21.48   4
   4  -2  -2 7033.77  549.91   3
  -4  -2   2 6895.55  351.72   1
  -4  -2   2 7566.32  404.84   4
   3  -2  -2 4897.81  363.71   3
  -3  -2   2 5300.81  278.48   4
  -3  -2   2 4480.07  240.70   1
  -2  -2   2  994.98   49.64   1
  -2  -2   2 1136.19   57.26   4
   2  -2  -2 1012.06   78.34   3
   2  -2  -2 1185.29   58.28   2
   2  -2  -2  875.28   56.65   4
   1  -2  -2  124.21   18.86   3
  -1  -2   2  144.97   10.42   4
   0  -2  -2  426.37   37.02   3
   0  -2   2  492.50   37.11   3
   0  -2   2  536.18   27.38   4
   0  -2  -2  434.60   23.61   1
   0  -2  -2  540.72   27.93   2
  -1  -2  -2 1059.68   86.36   3
  -1  -2  -2 1210.15   64.53   2
   1  -2   2 1266.11   86.00   3
  -1   2  -2 1262.61   54.66   1
  -1  -2  -2  987.45   55.07   1
  -1  -2  -2 1092.18   63.73   4
  -2  -2  -2 2927.60  248.15   3
  -2  -2  -2 3499.69  182.20   4
  -2  -2  -2 2895.65  158.43   1
  -2   2  -2 3553.70  158.10   1
   2  -2   2 3689.49  256.34   3
  -2  -2  -2 3526.99  185.06   2
  -3  -2  -2  236.80   18.44   4
   3  -2   2  242.30   18.67   3
  -3  -2  -2  194.80   13.82   1
  -3   2  -2  247.67   12.08   1
  -3  -2  -2  209.66   18.25   2
   4  -2   2   -5.75    6.28   3
  -4  -2  -2    1.56  360.87   2
  -4  -2  -2   13.99   10.92   1
  -4   2  -2    5.66    3.69   1
  -5  -2  -2  405.68   21.65   1
  -5   2  -2  381.28   19.98   1
   5  -2   2  409.42   31.27   3
  -5  -2  -2  390.81   26.45   2
  -6  -2  -2  584.39   30.65   1
  -6  -2  -2  579.73   36.71   2
  -6   2  -2  639.04   29.83   1
   6  -2   2  594.32   45.88   3
  -7   2  -2 1002.95   45.43   1
  -7  -2  -2  899.97   46.21   1
  -7  -2  -2  915.91   54.29   2
   7  -2   2  890.07   70.04   3
   8  -2   2  273.66   24.90   3
  -8   2  -2  246.26   15.99   1
  -8  -2  -2  273.43   26.03   2
  -8  -2  -2  285.48   19.63   1
  -9   2  -2  125.94   27.37   2
  -9  -2  -2  152.62   19.08   1
  -9  -2  -2  171.11   26.37   2
   9  -2   2  192.00   21.24   3
  -9   2  -2  186.75   13.85   1
 -10  -2  -2   34.44   13.15   1
 -10  -2  -2    8.48   14.26   2
 -10   2  -2    1.41   15.00   2
 -10   2  -2    8.77    9.43   1
 -11   2  -2   -0.87   44.75   1
 -11  -2  -2   14.07   16.51   1
 -11   2  -2   -6.42   24.37   2
 -12  -2  -2   49.23   15.02   1
 -12   2  -2   66.85   22.84   2
 -12   2  -2   46.86   13.36   1
 -13  -2  -2   15.55   12.90   1
 -13   2  -2    2.89   10.04   2
 -13   2  -2   13.89   11.66   1
 -14   2  -2   -0.48    3.51   1
 -14  -2  -2   11.10   17.25   1
 -15   2  -2   11.57   14.65   1
 -15  -2  -2   11.63   15.31   1
 -16   2  -2  108.45   17.69   1
 -16  -2  -2   95.53   19.37   1
 -17   2  -2   -0.20    1.21   1
 -18   3   2   47.83   19.73   1
 -18  -3   2   58.32   19.21   1
 -17  -3   2   14.33   19.15   1
 -17   3   2   -2.94    8.83   1
 -16  -3   2    0.58   17.23   1
 -16   3   2   -4.76   10.88   1
 -15   3   2  215.59   18.83   1
 -15  -3   2  228.24   21.01   1
 -14  -3   2  122.25   17.92   1
 -14   3   2  111.67   15.36   1
 -13   3   2  302.45   20.17   1
  13  -3  -2  287.25   41.39   3
 -13  -3   2  326.94   22.05   1
 -12  -3   2  236.61   18.16   1
  12  -3  -2  141.32   45.97   3
 -12   3   2  188.22   15.17   1
 -11   3   2   80.90   12.57   1
 -11  -3   2   95.52   15.92   1
  11  -3  -2   25.99  157.04   3
 -10   3   2   -7.47   14.44   1
 -10  -3   2    3.27    9.04   1
  -9  -3   2  326.14   29.06   4
  -9   3   2  305.79   18.19   1
  -9  -3   2  335.51   20.49   1
   9  -3  -2  226.06   43.17   3
  -8  -3   2 1303.58   77.60   4
  -8   3   2 1420.75   66.79   1
  -8  -3   2 1363.94   67.50   1
   8  -3  -2 1428.39  105.99   3
  -7  -3   2  118.19   20.41   4
   7  -3  -2   62.87   35.28   3
  -7   3   2  115.07    9.87   1
  -7  -3   2  114.93   13.61   1
  -6  -3   2  577.00   29.20   1
  -6   3   2  575.93   28.38   1
   6  -3  -2  568.64   46.30   3
  -6  -3   2  572.95   36.46   4
  -5  -3   2   66.14   19.91   4
  -5   3   2   93.07    7.97   1
   5  -3  -2  111.38   14.94   3
  -5  -3   2   90.48   10.58   1
  -4  -3   2  186.45   15.11   4
  -4  -3   2  180.63   12.68   1
   4  -3  -2  192.30   19.45   3
  -3  -3   2 5657.10  278.01   1
  -3  -3   2 6104.38  334.48   4
   3  -3  -2 5918.10  436.36   3
  -2  -3   2 1191.41   53.97   1
   2  -3  -2 1089.98   85.38   3
   2  -3  -2 1056.90   61.85   4
  -2  -3   2 1177.91   62.30   4
  -1  -3   2 3472.86  176.11   1
   1  -3  -2 4297.38  206.12   4
  -1  -3   2 3973.90  197.69   4
   1  -3  -2 3311.37  269.88   3
  -1  -3   2 3227.50  269.75   3
   0  -3   2  446.92   25.95   4
   0  -3  -2  463.01   26.86   2
   0  -3  -2  406.98   22.04   1
   0  -3   2  471.67   35.18   3
   0  -3  -2  382.62   35.72   3
   0  -3  -2  516.67   26.00   4
  -1  -3  -2  691.53   38.14   4
   1  -3   2  687.91   38.08   4
  -1  -3  -2  682.31   33.29   1
  -1  -3  -2  660.85   38.68   2
  -1  -3  -2  683.99   52.58   3
  -2  -3  -2  163.89   18.96   3
   2  -3   2  190.59   16.32   3
  -2  -3  -2  163.48   15.99   4
  -2  -3  -2  162.83   12.21   1
  -2  -3  -2  169.47   15.23   2
  -2   3  -2  196.32    9.35   1
  -3  -3  -2  546.08   47.49   3
   3  -3   2  681.33   47.11   3
  -3  -3  -2  672.07   36.06   2
  -3  -3  -2  618.95   36.54   4
  -3   3  -2  623.33   29.84   1
  -3  -3  -2  576.43   30.69   1
  -4  -3  -2 1502.85   83.63   2
  -4  -3  -2 1448.96   71.89   1
  -4  -3  -2 1369.51   82.68   4
  -4   3  -2 1536.84   71.07   1
   4  -3   2 1575.33  111.43   3
  -5   3  -2  673.91   31.43   1
  -5  -3  -2  671.08   37.97   2
  -5  -3  -2  573.54   38.69   4
   5  -3   2  668.62   49.16   3
  -5  -3  -2  601.52   32.46   1
  -6  -3  -2  368.70   26.93   2
  -6  -3  -2  374.91   22.47   1
  -6   3  -2  430.36   20.60   1
   6  -3   2  422.73   32.96   3
  -7   3  -2   23.29    7.89   1
   7  -3   2   14.88   16.49   3
  -7  -3  -2   22.25   11.72   1
  -8  -3  -2   64.89   27.00   2
   8  -3   2   80.56   19.25   3
  -8  -3  -2  103.21   16.92   1
  -8   3  -2  109.07   10.56   1
  -9  -3  -2  784.25   41.15   1
  -9   3  -2  782.13   39.57   1
  -9  -3  -2  812.90   50.51   2
   9  -3   2  795.87   61.82   3
 -10  -3  -2  685.52   44.95   2
 -10  -3  -2  727.65   38.07   1
 -10   3  -2  744.47   36.62   1
 -11   3  -2  286.24   29.72   2
 -11   3  -2  246.50   16.89   1
 -11  -3  -2  298.70   20.20   1
 -12  -3  -2   85.28   16.50   1
 -12   3  -2   72.95   29.47   2
 -12   3  -2   59.49   12.18   1
 -13  -3  -2   81.91   17.08   1
 -13   3  -2  108.41   14.53   1
 -13   3  -2   89.18   26.54   2
 -14  -3  -2    8.24   22.03   1
 -14   3  -2   19.51   13.37   1
 -15  -3  -2  215.19   21.57   1
 -15   3  -2  193.55   19.14   1
 -16  -3  -2  145.76   21.61   1
 -16   3  -2  155.17   19.99   1
 -17  -4   2  111.47   21.30   1
 -17   4   2   78.66   18.89   1
 -16   4   2   38.70   19.78   1
 -16  -4   2   70.83   18.00   1
 -15   4   2   95.98   16.40   1
 -15  -4   2   92.55   19.29   1
 -14  -4   2   19.43   19.41   1
 -14   4   2   16.05   12.31   1
  13  -4  -2   46.69   23.15   3
 -13   4   2   -2.39    8.28   1
 -13  -4   2   14.27   14.55   1
 -12   4   2  358.96   20.70   1
 -12  -4   2  341.07   22.28   1
  12  -4  -2  357.70   35.14   3
 -11  -4   2  308.15   20.96   1
 -11   4   2  263.83   17.39   1
  11  -4  -2  302.20   30.95   3
 -10   4   2  191.85   15.16   1
 -10  -4   2  232.46   31.44   4
  10  -4  -2  233.72   27.65   3
 -10  -4   2  210.31   19.86   1
  -9  -4   2  153.72   16.88   1
   9  -4  -2  151.72   24.97   3
  -9   4   2  142.62   12.72   1
  -9  -4   2  172.28   27.02   4
  -8  -4   2   39.12   15.20   1
  -8  -4   2   55.96   20.31   4
  -8   4   2   41.72    9.73   1
   8  -4  -2   52.47   20.68   3
  -7  -4   2  162.62   25.50   4
   7  -4  -2  259.42   23.58   3
  -7  -4   2  238.15   16.09   1
  -7   4   2  216.18   12.88   1
  -6  -4   2  830.74   50.72   4
  -6  -4   2  853.01   42.63   1
  -6   4   2  913.30   41.81   1
   6  -4  -2  832.63   66.00   3
  -5  -4   2 1850.35  108.13   4
  -5   4   2 2056.24   93.45   1
  -5  -4   2 1945.46   94.07   1
   5  -4  -2 1979.22  147.22   3
   4  -4  -2 1659.73  122.02   3
  -4  -4   2 1571.75   89.51   4
  -4  -4   2 1625.54   77.72   1
  -3  -4   2 1058.09   47.38   1
  -3  -4   2 1009.75   54.84   4
   3  -4  -2  968.51   74.82   3
   3  -4  -2  890.65   54.05   4
  -2  -4   2 1032.70   44.93   1
   2  -4  -2  799.97   70.90   3
   2  -4  -2  909.59   51.51   4
  -2  -4   2  991.57   52.03   4
   1  -4  -2  140.18   17.98   3
  -1  -4   2  152.42   17.66   3
  -1  -4   2  160.61   12.58   4
  -1  -4   2  157.14    8.67   1
   1  -4  -2  161.88   10.95   4
   0  -4   2 2103.62  146.25   3
   0  -4  -2 1836.89   92.89   1
   0  -4   2 2039.76  107.05   4
   0  -4  -2 1878.32  108.91   2
   0  -4  -2 1711.38  146.14   3
   0  -4  -2 2138.03  107.00   4
  -1  -4  -2 1347.19   66.82   1
   1  -4   2 1525.64  104.89   3
   1  -4   2 1459.10   76.84   4
  -1  -4  -2 1264.45   78.11   2
  -1  -4  -2 1417.11  105.36   3
  -1  -4  -2 1351.08   76.86   4
   2  -4   2  447.95   32.29   3
  -2  -4  -2  418.43   24.90   2
  -2  -4  -2  392.96   20.93   1
  -2   4  -2  410.90   19.71   1
  -2  -4  -2  389.35   33.65   3
  -2  -4  -2  393.48   26.86   4
  -3  -4  -2   45.38   16.34   3
  -3   4  -2   45.93    4.47   1
  -3  -4  -2   54.77   11.08   2
  -3  -4  -2   41.14    9.56   1
   3  -4   2   45.47   11.24   3
  -3  -4  -2   27.18   21.27   4
  -4   4  -2  682.79   32.88   1
   4  -4   2  734.18   52.12   3
  -4  -4  -2  626.13   34.08   1
  -4  -4  -2  692.85   40.15   2
  -4  -4  -2  663.94   41.08   4
  -5  -4  -2  206.32   23.06   4
  -5  -4  -2  223.76   16.28   1
  -5  -4  -2  213.11   19.87   2
   5  -4   2  244.25   20.43   3
  -5   4  -2  237.66   12.24   1
  -6  -4  -2  236.90   17.86   1
  -6  -4  -2  232.19   22.28   2
  -6   4  -2  267.12   13.96   1
  -6  -4  -2  231.68   23.48   4
   6  -4   2  274.05   22.63   3
  -7   4  -2 1983.67   89.73   1
  -7  -4  -2 1578.50  105.18   4
  -7  -4  -2 1869.20  105.28   2
  -7  -4  -2 1906.97   91.18   1
   7  -4   2 1974.89  140.32   3
  -8  -4  -2   71.16   19.74   2
  -8   4  -2   74.83   10.35   1
   8  -4   2   29.61   24.45   3
  -8  -4  -2   32.22   16.74   1
  -9   4  -2  104.12   11.37   1
   9  -4   2   58.03   21.27   3
  -9  -4  -2   79.70   16.95   1
  -9  -4  -2  104.23   17.49   2
 -10  -4  -2   51.34   16.36   1
 -10   4  -2   73.40   11.53   1
 -11  -4  -2    3.53   78.98   1
 -11   4  -2   -2.26    6.81   1
 -12   4  -2  534.91   27.76   1
 -12   4  -2  529.01   38.80   2
 -12  -4  -2  465.48   29.49   1
 -13  -4  -2   56.68   20.38   1
 -13   4  -2   76.01   14.63   1
 -13   4  -2   55.47   29.73   2
 -14   4  -2  274.76   34.90   2
 -14   4  -2  288.17   20.47   1
 -14  -4  -2  253.57   23.13   1
 -15  -4  -2   26.61   18.68   1
 -16  -4  -2   43.17   24.25   1
 -17  -5   2   41.02   17.86   1
 -16  -5   2   16.95   20.20   1
 -15   5   2    2.14    6.47   1
 -15  -5   2   29.52   17.38   1
 -14  -5   2    1.47   34.53   1
 -14   5   2   14.38   11.83   1
 -13   5   2  143.63   14.42   1
  13  -5  -2  135.82   29.79   3
 -13  -5   2  114.32   18.56   1
 -12   5   2   -1.36    9.66   1
  12  -5  -2   14.51   25.20   3
 -12  -5   2    3.93   10.84   1
 -11  -5   2   21.49   15.00   1
 -11  -5   2   37.80   20.35   4
  11  -5  -2    9.01   25.12   3
 -11   5   2    6.11    7.54   1
 -10  -5   2  154.18   28.03   4
 -10   5   2  106.52   11.65   1
  10  -5  -2  115.79   26.77   3
 -10  -5   2  104.11   17.20   1
  -9   5   2   36.17   10.45   1
   9  -5  -2   48.13   22.82   3
  -9  -5   2   67.24   30.60   4
  -9  -5   2   33.45   17.98   1
  -8  -5   2  748.30   50.35   4
  -8   5   2  818.08   38.83   1
   8  -5  -2  800.19   63.08   3
  -8  -5   2  759.80   40.09   1
  -7  -5   2  963.73   50.44   1
  -7  -5   2 1011.27   61.01   4
   7  -5  -2 1063.32   78.63   3
  -7   5   2 1030.27   49.37   1
  -6   5   2  650.32   30.57   1
  -6  -5   2  583.90   39.63   4
  -6  -5   2  641.41   31.69   1
   6  -5  -2  591.30   49.79   3
  -5  -5   2   11.57   11.22   4
  -5   5   2    1.49   10.43   1
  -5  -5   2    7.37   11.64   1
   5  -5  -2   19.66    7.34   4
  -4  -5   2  193.35   18.40   4
  -4  -5   2  200.91   12.88   1
   4  -5  -2  153.60   25.54   3
   4  -5  -2  194.03   14.12   4
  -3  -5   2   -3.85   14.08   4
  -3  -5   2   12.39    7.43   1
   3  -5  -2   10.53   11.00   3
   3  -5  -2    0.33    2.49   4
  -2  -5   2  346.07   21.87   4
  -2  -5   2  380.63   17.70   1
   2  -5  -2  300.36   30.91   3
  -2  -5   2  366.24   31.45   3
   2  -5  -2  347.74   20.92   4
  -1  -5   2  939.85   45.70   1
   1  -5  -2  889.10   73.17   3
  -1  -5   2  927.77   73.21   3
   1  -5  -2 1006.36   53.14   4
  -1  -5   2 1020.26   53.49   4
   0  -5  -2  290.50   18.02   4
   0  -5  -2  259.95   13.87   1
   0  -5   2  253.10   24.12   3
   0  -5  -2  232.79   18.92   2
   0  -5  -2  253.02   25.06   3
   0  -5   2  305.53   17.75   4
  -1  -5  -2  913.78   54.23   2
  -1  -5  -2  934.45   73.19   3
   1  -5   2  956.05   72.46   3
   1  -5   2  997.30   53.16   4
  -1  -5  -2  998.92   46.14   1
  -1  -5  -2  901.93   53.24   4
  -2  -5  -2  406.05   26.45   2
   2  -5   2  454.88   25.12   4
   2  -5   2  451.39   33.74   3
  -2  -5  -2  422.96   21.77   1
  -2  -5  -2  380.09   35.81   3
  -2  -5  -2  376.60   26.30   4
  -3  -5  -2  356.61   22.23   2
   3  -5   2  348.40   27.45   3
  -3  -5  -2  369.68   29.86   3
  -3  -5  -2  302.94   25.38   4
  -3   5  -2  301.71   16.28   1
  -3  -5  -2  366.51   18.29   1
  -4  -5  -2  288.19   26.32   4
  -4  -5  -2  290.90   28.16   3
   4  -5   2  298.13   24.75   3
  -4  -5  -2  291.76   17.48   1
  -4  -5  -2  283.47   20.11   2
  -4   5  -2  287.06   14.33   1
  -5  -5  -2 1182.10   56.55   1
   5  -5   2 1201.83   86.82   3
  -5  -5  -2 1060.07   66.18   4
  -5  -5  -2 1127.46   65.10   2
  -5   5  -2 1146.88   54.90   1
  -6  -5  -2  318.08   20.77   1
  -6   5  -2  320.86   16.46   1
  -6  -5  -2  287.12   28.65   4
  -6  -5  -2  316.32   24.09   2
   6  -5   2  335.51   27.68   3
   7  -5   2   63.97   15.89   3
  -7  -5  -2   81.52   14.40   1
  -7  -5  -2   43.24   22.92   2
  -7  -5  -2   83.92   23.00   4
  -7   5  -2   68.82    8.21   1
  -8  -5  -2  223.63   22.37   1
  -8  -5  -2  241.51   31.82   4
  -8  -5  -2  187.98   23.79   2
   8  -5   2  246.78   23.82   3
  -8   5  -2  255.90   14.68   1
  -9   5  -2  117.32   11.27   1
  -9  -5  -2   98.24   18.30   1
   9  -5   2  116.96   17.52   3
 -10  -5  -2   71.05   16.97   1
 -10   5  -2   62.66   10.83   1
 -11   5  -2  244.29   16.67   1
 -11  -5  -2  228.16   21.09   1
 -12  -5  -2   23.19   16.90   1
 -12   5  -2   17.17   12.61   1
 -13   5  -2   19.22   50.33   2
 -13  -5  -2   24.94   17.11   1
 -14  -5  -2   30.89   21.45   1
 -14   5  -2   32.63   39.00   2
 -15  -5  -2  109.29   23.21   1
 -16  -5  -2    4.55   24.86   1
 -17  -6   2  131.54   26.23   1
 -16  -6   2    6.30   11.90   1
 -15  -6   2   38.10   19.99   1
 -14  -6   2   14.43   14.70   1
  13  -6  -2   15.07   21.39   3
 -13  -6   2    7.76   13.07   1
  12  -6  -2   13.38   30.12   3
 -12  -6   2   37.89   17.33   1
 -12  -6   2   75.13   29.78   4
 -12   6   2   17.41   11.23   1
 -11  -6   2 1016.98   53.21   1
 -11   6   2 1106.50   51.91   1
  11  -6  -2 1019.36   81.58   3
 -11  -6   2 1036.69   63.56   4
 -10   6   2   41.15   10.06   1
 -10  -6   2   38.93   25.46   4
 -10  -6   2   27.98   14.08   1
  10  -6  -2   25.72   21.31   3
  -9  -6   2  354.56   22.34   1
  -9   6   2  331.96   18.89   1
  -9  -6   2  347.54   39.45   4
   9  -6  -2  334.92   34.99   3
  -8  -6   2    2.20   17.02   4
  -8   6   2   24.57    8.41   1
   8  -6  -2    2.41   14.49   3
  -8  -6   2   32.18   14.57   1
  -7  -6   2   18.71   13.33   1
  -7   6   2    9.04    9.00   1
  -6  -6   2  100.71   12.81   1
   6  -6  -2   95.65   12.74   4
  -6   6   2   85.71    8.15   1
   6  -6  -2   59.54   30.36   3
  -6  -6   2  148.28   19.21   4
   5  -6  -2 1389.71  103.83   3
  -5   6   2 1268.41   65.30   1
   5  -6  -2 1470.67   75.78   4
  -5  -6   2 1469.66   66.30   1
  -5  -6   2 1236.28   76.35   4
  -4  -6   2   -0.80    7.85   1
  -4  -6   2    5.52   14.35   4
   4  -6  -2    4.51   10.72   3
   4  -6  -2    2.63   10.15   4
   3  -6  -2  506.76   41.64   3
  -3  -6   2  454.79   30.68   4
   3  -6  -2  504.39   29.23   4
  -3  -6   2  543.15   25.23   1
   2  -6  -2  710.56   36.93   4
   2  -6  -2  592.42   51.18   3
  -2  -6   2  612.66   37.14   4
  -2  -6   2  667.52   51.49   3
  -2  -6   2  662.69   31.59   1
  -1  -6   2  957.03   68.32   3
  -1  -6   2  818.80   42.00   1
  -1  -6   2  876.29   49.59   4
   1  -6  -2  899.53   68.12   3
   1  -6  -2  866.09   49.17   4
   0  -6  -2   73.00   19.08   3
   0  -6  -2   61.95   15.03   4
   0  -6   2   88.23   12.17   4
   0  -6   2   81.02   17.90   3
   0  -6  -2   68.94    7.38   1
  -1  -6  -2  805.13   37.58   1
  -1  -6  -2  681.74   43.67   4
  -1  -6  -2  783.27   60.42   3
   1  -6   2  851.20   43.72   4
  -1  -6  -2  742.70   44.46   2
   1  -6   2  744.52   59.26   3
  -2  -6  -2  459.54   22.88   1
  -2  -6  -2  419.09   28.29   2
  -2  -6  -2  408.69   27.71   4
   2  -6   2  467.61   35.93   3
  -2  -6  -2  436.62   37.72   3
   2  -6   2  472.61   26.63   4
   3  -6   2 1639.38  123.99   3
  -3  -6  -2 1653.79  125.31   3
   3  -6   2 1728.80   91.19   4
  -3  -6  -2 1601.90   79.39   1
  -3  -6  -2 1587.19   91.84   4
  -3  -6  -2 1675.61   92.89   2
  -4  -6  -2   40.40   12.22   1
  -4   6  -2   26.33    3.26   1
   4  -6   2   45.96   11.99   4
   4  -6   2   31.12   15.55   3
  -4  -6  -2   53.14   21.19   3
  -4  -6  -2   27.93   14.12   2
  -4  -6  -2   15.70   82.42   4
  -5  -6  -2  611.58   36.25   2
   5  -6   2  635.23   46.75   3
  -5  -6  -2  540.59   43.61   4
  -5  -6  -2  606.86   31.04   1
  -5   6  -2  565.71   28.81   1
  -6  -6  -2    3.97    8.17   2
  -6  -6  -2    8.05   14.93   4
   6  -6   2    8.72   12.17   3
  -6  -6  -2    4.17   14.16   1
  -7  -6  -2  551.32   43.12   4
  -7  -6  -2  609.89   32.09   1
   7  -6   2  589.63   46.48   3
  -7   6  -2  574.20   28.82   1
  -7  -6  -2  576.33   35.86   2
  -8  -6  -2   23.62   12.07   2
   8  -6   2    6.81   31.62   3
  -8   6  -2    8.51    7.31   1
  -8  -6  -2   16.02   15.78   1
  -8  -6  -2   43.02   18.05   4
  -9   6  -2   81.09   10.32   1
  -9  -6  -2   76.20   17.38   1
   9  -6   2   75.70   17.54   3
  -9  -6  -2  111.64   27.65   4
 -10  -6  -2   18.20   17.14   1
 -11  -6  -2  182.02   21.50   1
 -12  -6  -2   11.21   16.87   1
 -13  -6  -2  362.58   28.08   1
 -14  -6  -2   20.95   14.23   1
 -15  -6  -2   28.34   22.75   1
 -16  -7   2   30.88   25.27   1
 -15  -7   2  120.37   21.10   1
 -14  -7   2    3.05   18.28   1
 -13  -7   2  171.64   18.77   1
 -13  -7   2  232.35   34.93   4
 -12  -7   2   64.98   25.66   4
 -12  -7   2   26.44   15.26   1
  11  -7  -2   31.42   33.40   3
 -11  -7   2   75.36   28.90   4
 -11  -7   2   55.96   16.54   1
  10  -7  -2   35.76   24.88   3
 -10  -7   2   74.16   32.98   4
 -10  -7   2   36.60   12.82   1
   9  -7  -2  870.56   69.63   3
  -9  -7   2  855.15   56.85   4
  -9   7   2  945.16   43.96   1
  -9  -7   2  869.69   45.17   1
  -8   7   2  216.66   14.12   1
  -8  -7   2  206.28   37.24   4
   8  -7  -2  237.19   25.74   3
  -8  -7   2  249.36   17.34   1
  -7  -7   2  221.48   33.70   4
  -7  -7   2  244.94   18.27   1
  -7   7   2  241.44   14.80   1
   7  -7  -2  306.58   28.50   3
   7  -7  -2  284.44   20.11   4
   6  -7  -2   11.74   12.02   4
  -6  -7   2    5.57   11.32   1
  -6  -7   2   29.93   13.49   4
  -6   7   2    6.29    6.35   1
   6  -7  -2    8.36   12.09   3
  -5   7   2  279.59   16.40   1
  -5  -7   2  285.55   25.10   4
   5  -7  -2  348.79   21.56   4
  -5  -7   2  361.98   18.30   1
   5  -7  -2  352.17   31.16   3
  -4  -7   2   88.07   20.21   4
   4  -7  -2  117.08   13.55   4
  -4  -7   2  128.30    9.95   1
   4  -7  -2   97.59   21.13   3
   3  -7  -2 2047.00  108.87   4
  -3  -7   2 1876.61  109.30   4
   3  -7  -2 1761.00  149.04   3
  -3  -7   2 2204.05   94.46   1
  -2  -7   2   33.75   13.04   4
   2  -7  -2   40.10   20.67   3
   2  -7  -2   32.46   11.48   4
  -2  -7   2   32.33    5.90   1
  -2  -7   2   66.56   19.69   3
  -1  -7   2  595.39   28.57   1
  -1  -7   2  634.15   48.31   3
   1  -7  -2  571.82   34.06   4
  -1  -7   2  570.89   34.59   4
   1  -7  -2  597.74   47.98   3
   0  -7   2   41.18   14.89   4
   0  -7  -2   44.03   26.53   3
   0  -7  -2   52.83    6.85   1
   0  -7  -2   26.20   19.11   4
   0  -7   2   55.54   19.52   3
  -1  -7  -2  253.53   20.89   4
  -1  -7  -2  287.51   14.67   1
   1  -7   2  239.15   24.11   3
  -1  -7  -2  244.15   27.43   3
   1  -7   2  290.35   19.12   4
  -2  -7  -2   40.24   22.41   3
  -2  -7  -2   44.83   10.01   1
   2  -7   2   42.45   17.15   3
  -2  -7  -2   47.76   17.22   4
   2  -7   2   47.88   13.97   4
   3  -7   2 1542.03  117.29   3
   3  -7   2 1614.47   86.31   4
  -3  -7  -2 1659.13   88.10   2
  -3  -7  -2 1502.10   74.96   1
  -3  -7  -2 1443.05   86.70   4
  -3  -7  -2 1551.30  118.88   3
   4  -7   2   46.86   17.27   3
  -4  -7  -2   36.57   19.38   2
  -4  -7  -2   58.78   26.52   3
   4  -7   2   57.94   15.17   4
  -4  -7  -2   40.75   12.02   1
  -5  -7  -2 1071.21   67.85   4
   5  -7   2 1078.99   86.37   3
  -5  -7  -2 1171.53   65.25   2
   5  -7   2 1181.34   63.97   4
  -5  -7  -2 1154.07   56.15   1
  -6  -7  -2   -2.84    6.92   2
   6  -7   2    6.03   14.11   3
  -6  -7  -2    3.06   38.53   4
  -6  -7  -2    0.92    9.62   1
   7  -7   2  106.60   18.37   3
  -7  -7  -2   91.95   16.61   2
  -7  -7  -2  107.58   32.23   4
  -7  -7  -2   66.39   17.26   1
  -8  -7  -2    0.07   16.45   1
  -8  -7  -2   71.06   28.48   4
   8  -7   2   23.86   16.57   3
   9  -7   2  737.55   56.66   3
  -9  -7  -2  648.45   49.03   4
  -9  -7  -2  726.63   38.59   1
 -10  -7  -2   38.55   15.82   1
 -10  -7  -2   67.42   27.04   4
 -11  -7  -2  351.85   25.74   1
 -12  -7  -2    2.22   17.45   1
 -13  -7  -2    0.37    1.48   1
 -14  -7  -2   -1.62   16.83   1
 -15  -7  -2  134.53   25.25   1
 -15   7  -2   78.48   42.07   2
 -16  -8   2    5.26   16.93   1
 -15  -8   2  106.95   20.28   1
 -14  -8   2   43.54   20.09   1
 -13  -8   2   41.47   29.48   4
 -13  -8   2   22.36   14.96   1
 -12  -8   2   66.56   26.70   4
 -12  -8   2   -2.30    8.81   1
  12  -8  -2    8.83   26.64   3
 -11  -8   2  369.60   35.34   4
  11  -8  -2  309.51   29.45   3
 -11  -8   2  252.26   20.23   1
 -10  -8   2   39.81   13.04   1
  10  -8  -2   67.92   16.15   4
 -10  -8   2   22.03   28.93   4
  10  -8  -2   32.58   20.28   3
   9  -8  -2  544.68   32.60   4
   9  -8  -2  570.52   44.44   3
  -9  -8   2  475.16   28.85   1
  -9  -8   2  614.87   41.91   4
   8  -8  -2   -1.64    9.56   4
   8  -8  -2   12.43   16.14   3
  -8  -8   2    2.14   32.50   1
   7  -8  -2   28.55   18.53   3
  -7  -8   2    7.16   13.71   1
   7  -8  -2   12.16   13.74   4
   6  -8  -2  298.23   31.95   3
   6  -8  -2  324.26   22.53   4
  -6  -8   2  348.09   19.05   1
  -6  -8   2  284.61   27.22   4
   5  -8  -2  207.89   18.90   4
  -5  -8   2  235.04   14.85   1
   5  -8  -2  200.34   26.65   3
  -5  -8   2  221.22   23.92   4
  -4  -8   2   87.18   19.60   4
   4  -8  -2  117.65   14.78   4
  -4  -8   2  138.78   10.60   1
   4  -8  -2  115.45   24.54   3
  -3  -8   2   85.92    8.48   1
   3  -8  -2   83.47   14.85   4
  -3  -8   2   63.24   21.73   4
   3  -8  -2   75.59   25.09   3
  -2  -8   2    5.16   10.30   4
  -2  -8   2   -2.38   37.59   3
   2  -8  -2    2.15   19.44   3
   2  -8  -2    6.54    8.93   4
  -2  -8   2   10.68    6.26   1
  -1  -8   2  152.89   24.03   3
  -1  -8   2  132.44    7.81   1
  -1  -8   2  141.72   16.66   4
   1  -8  -2  171.49   14.64   4
   1  -8  -2  112.32   25.19   3
   0  -8   2   20.07   18.56   3
   0  -8  -2    6.19  335.88   4
   0  -8   2   28.39   14.33   4
   0  -8  -2    2.15   87.37   3
  -1  -8  -2 1252.95   93.74   3
  -1  -8  -2 1137.42   68.05   4
   1  -8   2 1064.92   92.34   3
   1  -8   2 1248.58   68.09   4
  -1  -8  -2 1339.83   58.55   1
  -2  -8  -2    9.95   16.56   4
  -2  -8  -2    9.64    9.15   1
   2  -8   2    0.40   18.17   3
   2  -8   2    0.12   15.94   4
   3  -8   2  470.44   29.41   4
  -3  -8  -2  444.26   42.73   3
  -3  -8  -2  449.99   23.77   1
   3  -8   2  438.59   37.67   3
  -3  -8  -2  443.06   31.07   4
  -4  -8  -2   12.48   26.11   3
  -4  -8  -2   -5.53   11.24   1
   4  -8   2    7.25   15.74   4
   5  -8   2    1.82    9.81   3
   5  -8   2   11.73   14.45   4
  -5  -8  -2    8.79   14.59   1
   6  -8   2    4.95   14.73   3
  -6  -8  -2    2.33   18.61   4
  -6  -8  -2   -6.84   11.37   2
   6  -8   2    7.79   15.25   4
  -6  -8  -2    2.78   10.46   1
  -7  -8  -2  167.71   32.17   4
   7  -8   2  177.82   17.16   4
  -7  -8  -2  137.97   16.55   1
  -7  -8  -2  132.08   18.48   2
   7  -8   2  149.14   20.86   3
  -8  -8  -2   88.55   28.47   4
  -8  -8  -2   66.52   14.65   1
   8  -8   2   48.80   18.83   3
  -9  -8  -2   60.70   26.57   4
 -10  -8  -2   67.41   19.12   1
 -10  -8  -2   40.22   28.58   4
 -11  -8  -2  163.96   20.53   1
 -12  -8  -2   23.07   25.97   1
 -13  -8  -2  326.95   28.02   1
 -14  -8  -2   15.21   22.22   1
 -15  -9   2   25.90   20.09   1
 -14  -9   2   74.49   33.38   4
 -14  -9   2   60.05   17.51   1
  13  -9  -2  106.89   18.76   4
 -13  -9   2  164.44   37.17   4
 -13  -9   2   94.10   18.74   1
  12  -9  -2    6.85   27.55   3
  12  -9  -2    2.30   11.07   4
 -12  -9   2    3.65   86.17   1
 -12  -9   2   59.90   26.91   4
  11  -9  -2   11.61   16.97   4
  11  -9  -2    6.55   20.69   3
 -11  -9   2    8.08   21.82   4
 -11  -9   2    0.59    1.82   1
 -10  -9   2   28.74   30.60   4
 -10  -9   2   19.84   12.98   1
  10  -9  -2   28.88   17.79   3
  10  -9  -2   25.90   13.22   4
   9  -9  -2   34.97   21.33   3
   9  -9  -2   51.41   15.20   4
  -9  -9   2   25.01   30.18   4
  -9  -9   2   45.11   13.55   1
   8  -9  -2  225.10   25.50   3
  -8  -9   2  229.90   33.26   4
   8  -9  -2  251.02   19.14   4
  -8  -9   2  213.44   16.50   1
   7  -9  -2  934.13   54.17   4
  -7  -9   2  897.95   55.57   4
  -7  -9   2 1002.50   47.49   1
   7  -9  -2  959.69   74.32   3
   6  -9  -2   34.95   19.51   3
   6  -9  -2   32.54   12.65   4
  -6  -9   2   40.73   10.11   1
  -6  -9   2   45.27   16.94   4
   5  -9  -2   66.37   23.17   3
   5  -9  -2   77.06   14.84   4
  -5  -9   2   72.97   10.58   1
  -5  -9   2   58.71   21.10   4
   4  -9  -2   72.61   27.52   3
   4  -9  -2   97.97   16.63   4
  -4  -9   2   71.64   23.99   4
  -4  -9   2  122.94   10.62   1
   3  -9  -2  111.13   27.52   3
  -3  -9   2  115.30   24.77   4
   3  -9  -2  115.25   16.74   4
  -3  -9   2  121.06    9.90   1
  -2  -9   2   42.52   27.82   3
   2  -9  -2   42.08   14.02   4
  -2  -9   2   32.54    7.30   1
  -2  -9   2   45.60   17.97   4
   2  -9  -2   43.72   27.61   3
  -1  -9   2  190.43   27.68   3
   1  -9  -2  140.61   27.41   3
   1  -9  -2  158.21   17.24   4
  -1  -9   2  128.13   18.12   4
   0  -9   2   23.54   22.73   3
   0  -9   2    8.82   17.57   4
   1  -9   2   47.52   17.70   4
  -1  -9  -2   49.53   22.04   4
  -1  -9  -2   45.11    8.58   1
   1  -9   2   37.95   20.03   3
  -1  -9  -2   41.95   30.03   3
  -2  -9  -2   80.89   26.99   3
  -2  -9  -2   75.64   10.54   1
   2  -9   2   80.20   16.52   4
  -2  -9  -2   55.81   21.27   4
   2  -9   2   63.30   21.71   3
  -3  -9  -2   17.33   13.86   4
   3  -9   2    5.46   66.63   3
  -3  -9  -2   10.03   18.33   3
  -3  -9  -2   -0.98   14.15   1
   4  -9   2  338.64   31.65   3
   4  -9   2  340.94   24.84   4
  -4  -9  -2  406.11   38.32   3
  -4  -9  -2  310.63   33.34   4
  -4  -9  -2  342.27   19.78   1
  -5  -9  -2  375.54   20.78   1
   5  -9   2  378.34   24.76   4
  -5  -9  -2  314.77   33.37   4
   5  -9   2  364.70   31.83   3
  -6  -9  -2  165.23   30.71   4
  -6  -9  -2  141.65   15.74   1
   6  -9   2  180.51   17.61   4
   6  -9   2  176.04   21.05   3
   7  -9   2   14.93   13.85   4
  -7  -9  -2    1.37    3.42   1
   7  -9   2   -2.89    6.60   3
  -8  -9  -2   77.75   17.12   1
   8  -9   2   93.80   15.95   4
  -8  -9  -2   94.09   31.70   4
   8  -9   2   69.18   19.48   3
  -9  -9  -2   51.40   16.80   1
  -9  -9  -2   95.13   31.22   4
   9  -9   2   64.85   15.25   4
  10  -9   2   23.58   15.31   4
 -10  -9  -2   42.98   17.92   1
 -10  -9  -2   82.93   27.13   4
 -11  -9  -2  115.32   36.47   4
 -11  -9  -2   80.24   22.09   1
 -12  -9  -2   27.27   21.27   1
 -13  -9  -2   26.03   25.46   1
 -14  -9  -2    6.76   84.24   1
 -15 -10   2   10.64   15.04   1
 -14 -10   2   57.85   30.68   4
 -14 -10   2    5.70   13.67   1
 -13 -10   2   70.77   29.71   4
 -13 -10   2    8.16   20.03   1
 -12 -10   2  150.51   18.52   1
  12 -10  -2  164.47   21.10   4
  12 -10  -2  162.18   27.10   3
 -12 -10   2  209.02   34.84   4
  11 -10  -2  192.37   19.88   4
  11 -10  -2  185.56   26.13   3
 -11 -10   2  195.57   36.84   4
 -11 -10   2  155.33   17.32   1
 -10 -10   2   95.80   33.75   4
 -10 -10   2   75.81   14.65   1
  10 -10  -2   82.88   22.91   3
  10 -10  -2  103.28   16.88   4
   9 -10  -2  111.89   22.56   3
   9 -10  -2  102.79   17.18   4
  -9 -10   2  119.69   13.67   1
  -9 -10   2  104.38   32.49   4
   8 -10  -2   11.25   13.65   4
   8 -10  -2    2.15   71.17   3
  -8 -10   2   -2.24    8.61   1
  -7 -10   2  149.80   21.83   4
   7 -10  -2  113.34   22.82   3
   7 -10  -2  135.52   15.77   4
  -7 -10   2  132.65   13.12   1
   6 -10  -2  222.89   19.04   4
   6 -10  -2  225.93   26.37   3
  -6 -10   2  231.99   23.40   4
  -6 -10   2  257.40   15.32   1
  -5 -10   2  557.63   26.34   1
   5 -10  -2  513.80   42.99   3
  -5 -10   2  500.98   33.60   4
   5 -10  -2  448.76   31.07   4
  -4 -10   2  119.78   23.97   4
   4 -10  -2  132.51   25.11   3
   4 -10  -2  140.26   15.67   4
   3 -10  -2  329.06   23.71   4
  -3 -10   2  347.82   27.87   4
   3 -10  -2  368.07   34.87   3
   2 -10  -2   11.17   29.82   3
   2 -10  -2   13.11   13.26   4
  -2 -10   2   28.93   21.93   3
  -1 -10   2   82.44   24.45   3
  -1 -10   2   83.22   17.19   4
   1 -10  -2   73.16   18.17   4
   1 -10  -2   74.77   31.10   3
   0 -10   2  768.25   46.33   4
   0 -10  -2  800.51   47.13   4
   0 -10  -2  822.74   64.53   3
   0 -10   2  793.90   63.50   3
   1 -10   2  557.94   35.14   4
   1 -10   2  566.78   46.71   3
  -1 -10  -2  542.97   35.77   4
  -1 -10  -2  572.23   47.86   3
  -2 -10  -2  216.57   21.82   4
   2 -10   2  190.27   19.58   4
  -2 -10  -2  242.60   31.34   3
  -2 -10  -2  225.25   13.89   1
   2 -10   2  213.16   25.08   3
  -3 -10  -2   35.74   21.41   3
   3 -10   2   21.72   14.27   4
  -3 -10  -2   12.16   10.55   1
  -3 -10  -2   49.14   17.64   4
   3 -10   2    9.62   15.80   3
  -4 -10  -2  186.07   29.33   3
   4 -10   2  105.64   19.80   3
  -4 -10  -2  154.64   22.04   4
   4 -10   2  110.77   16.74   4
  -4 -10  -2  137.22   12.57   1
  -5 -10  -2   13.86   87.16   4
   5 -10   2   43.64   17.52   3
   5 -10   2   36.17   15.35   4
  -5 -10  -2   33.32   12.69   1
  -6 -10  -2   47.08   13.06   1
   6 -10   2   40.65   14.50   4
   6 -10   2   62.17   19.66   3
  -6 -10  -2   39.87   32.80   4
   7 -10   2  410.94   28.41   4
  -7 -10  -2  440.05   39.66   4
   7 -10   2  431.70   36.41   3
  -7 -10  -2  404.82   24.56   1
   8 -10   2   82.04   16.73   4
  -8 -10  -2   69.22   14.70   1
   8 -10   2   79.66   21.53   3
  -8 -10  -2   84.48   29.12   4
  -9 -10  -2   76.98   30.95   4
   9 -10   2   43.51   19.59   4
  -9 -10  -2   46.18   17.14   1
  10 -10   2   16.93   20.10   4
 -10 -10  -2   -2.49   30.55   1
 -10 -10  -2   79.58   28.24   4
 -11 -10  -2   50.28   18.36   1
 -11 -10  -2  103.14   30.91   4
  11 -10   2   59.75   20.18   4
 -12 -10  -2  282.85   24.11   1
  12 -10   2  247.30   26.19   4
 -13 -10  -2  135.41   23.74   1
  13 -10   2  168.18   22.99   4
  14 -10   2  172.57   25.05   4
 -14 -11   2    6.53   15.32   1
 -13 -11   2   61.04   34.26   4
 -13 -11   2   18.26   16.32   1
 -12 -11   2   97.53   16.25   1
 -12 -11   2  194.79   37.27   4
  11 -11  -2    6.67   15.69   3
 -11 -11   2    7.52   13.14   1
 -11 -11   2   28.93   24.82   4
 -10 -11   2   11.77   18.67   1
 -10 -11   2   30.23   32.65   4
  10 -11  -2   16.35   20.34   3
  10 -11  -2   13.42   16.04   4
  -9 -11   2  133.29   31.70   4
   9 -11  -2  102.15   17.60   4
  -9 -11   2  119.67   14.29   1
   9 -11  -2  105.63   24.22   3
  -8 -11   2  153.15   13.96   1
   8 -11  -2  110.65   17.81   4
  -8 -11   2  130.52   27.98   4
   8 -11  -2  136.25   22.87   3
  -7 -11   2   56.82   17.97   4
   7 -11  -2   20.92   14.30   4
   7 -11  -2   55.17   23.46   3
   6 -11  -2  244.07   28.64   3
  -6 -11   2  266.40   23.41   4
   6 -11  -2  224.78   20.25   4
   5 -11  -2   16.51   14.14   4
  -5 -11   2   14.31   14.37   4
   5 -11  -2   15.44   20.48   3
   4 -11  -2   -7.47   24.92   4
   4 -11  -2    0.96   20.19   3
  -3 -11   2  612.13   40.69   4
   3 -11  -2  718.07   54.72   3
   3 -11  -2  642.09   39.09   4
   2 -11  -2  191.68   17.92   4
  -2 -11   2  175.64   24.15   4
   2 -11  -2  199.36   29.52   3
  -2 -11   2  235.21   29.43   3
   1 -11  -2   41.57   25.69   3
   1 -11  -2   38.06   19.82   4
  -1 -11   2   70.06   15.82   4
  -1 -11   2   82.69   20.79   3
   0 -11  -2   19.96   20.01   3
   0 -11   2   38.71   16.63   4
   0 -11   2   28.04   19.95   3
   0 -11  -2   17.02   18.18   4
   1 -11   2   72.33   16.91   4
   1 -11   2   51.92   22.29   3
  -1 -11  -2   84.90   18.41   4
  -1 -11  -2   88.52   26.11   3
  -2 -11  -2   17.57   20.36   4
   2 -11   2   12.20   12.97   4
   2 -11   2    5.66   11.95   3
  -2 -11  -2    2.47   12.55   3
   3 -11   2  474.72   32.94   4
  -3 -11  -2  601.06   47.53   3
   3 -11   2  490.78   43.66   3
  -3 -11  -2  591.91   34.82   4
  -4 -11  -2  382.47   27.64   4
   4 -11   2  323.81   25.15   4
  -4 -11  -2  426.82   37.70   3
   4 -11   2  305.18   31.59   3
  -5 -11  -2  125.25   13.45   1
   5 -11   2  106.24   20.98   3
   5 -11   2   97.12   17.56   4
  -5 -11  -2  144.05   32.22   4
  -6 -11  -2    6.04    7.64   1
   6 -11   2   11.40   20.34   3
  -6 -11  -2    4.03   44.98   4
   7 -11   2    6.42   23.83   4
   7 -11   2   16.31   20.88   3
  -7 -11  -2   -3.97   10.33   1
  -7 -11  -2   16.58   23.69   4
  -8 -11  -2   35.49   29.22   4
  -8 -11  -2   46.55   15.17   1
   8 -11   2   38.33   23.62   3
   8 -11   2   27.43   17.18   4
  -9 -11  -2  191.19   34.25   4
   9 -11   2  122.04   20.25   4
  -9 -11  -2  112.60   16.97   1
  10 -11   2   72.45   20.59   4
 -10 -11  -2  144.56   34.36   4
 -10 -11  -2   62.51   17.47   1
 -11 -11  -2   88.56   19.47   1
 -11 -11  -2  177.44   37.67   4
  11 -11   2   87.57   22.52   4
  12 -11   2    9.01   16.32   4
 -12 -11  -2   20.49   20.36   1
 -13 -11  -2   -6.30   14.27   1
  13 -11   2    2.22   10.00   4
 -14 -12   2   20.22   17.72   1
 -12 -12   2    8.66   25.17   4
  11 -12  -2   -3.54   23.22   3
 -11 -12   2   33.55   38.20   4
 -10 -12   2  311.02   37.53   4
  10 -12  -2  271.03   32.84   3
   9 -12  -2    5.42   14.33   3
   9 -12  -2   -6.22   11.73   4
  -8 -12   2    3.26   44.56   4
   8 -12  -2   42.16   21.80   3
   8 -12  -2   20.54   19.99   4
   7 -12  -2   27.37   15.54   4
   7 -12  -2   48.56   21.60   3
  -7 -12   2   79.53   17.76   4
  -6 -12   2   31.09   16.48   4
   6 -12  -2   11.72   14.05   4
  -5 -12   2   55.93   18.24   4
   5 -12  -2   12.45   16.74   4
   5 -12  -2    7.23  105.79   3
   4 -12  -2   33.91   16.07   4
   4 -12  -2   46.02   24.72   3
  -4 -12   2   43.42   19.65   4
   3 -12  -2  106.13   17.08   4
  -3 -12   2   74.76   21.96   4
   3 -12  -2   98.13   24.15   3
   2 -12  -2    4.23   28.45   3
   2 -12  -2   12.96   15.18   4
  -2 -12   2   50.37   22.82   3
  -1 -12   2   41.66   19.86   3
  -1 -12   2   43.62   17.50   4
   1 -12  -2   16.34   19.81   4
   1 -12  -2   29.10   25.75   3
   0 -12   2  184.15   20.02   4
   0 -12  -2  223.99   29.79   3
   0 -12   2  191.34   25.76   3
   0 -12  -2  194.18   21.06   4
  -1 -12  -2    8.40   18.76   3
  -1 -12  -2   -3.89   60.20   4
   1 -12   2   12.01   15.04   3
   2 -12   2  358.46   25.39   4
  -2 -12  -2  379.60   26.45   4
   2 -12   2  300.97   33.71   3
  -2 -12  -2  382.42   37.00   3
   3 -12   2   13.35   15.45   3
   3 -12   2    6.33   19.92   4
  -3 -12  -2   31.74   16.33   4
  -3 -12  -2    5.73   16.95   3
   4 -12   2   22.08   15.46   4
  -4 -12  -2   52.27   28.33   3
   4 -12   2   28.82   18.45   3
  -4 -12  -2   44.00   20.28   4
   5 -12   2   67.90   17.32   4
   5 -12   2   61.22   20.95   3
  -5 -12  -2   95.00   30.12   4
   6 -12   2   -1.11   34.10   3
  -6 -12  -2    4.83   34.15   4
   6 -12   2   -0.73    5.01   4
  -7 -12  -2   53.30   28.92   4
   7 -12   2   53.28   21.28   3
   7 -12   2   32.58   18.72   4
   8 -12   2  158.63   22.03   4
  -8 -12  -2  158.69   36.39   4
  -9 -12  -2   27.40   17.35   1
   9 -12   2   25.57   21.02   4
  -9 -12  -2   60.73   32.65   4
  10 -12   2   61.01   23.47   4
 -10 -12  -2  105.23   32.55   4
 -10 -12  -2   55.55   15.98   1
  11 -12   2   -0.43    2.77   4
 -11 -12  -2   12.00   17.28   1
 -11 -12  -2   52.63   34.52   4
 -12 -12  -2   33.37   20.94   1
  12 -12   2   23.52   23.83   4
 -11 -13   2   25.47   25.89   4
  11 -13  -2    4.57  210.20   3
  10 -13  -2   -1.26   36.19   3
   9 -13  -2   42.63   28.24   3
  -9 -13   2   51.26   44.39   4
   8 -13  -2  152.91   26.64   3
  -8 -13   2  129.57   32.25   4
   8 -13  -2  153.94   19.72   4
  -7 -13   2    5.86   18.95   4
   7 -13  -2   -2.47   25.03   3
   6 -13  -2   48.03   24.62   3
   6 -13  -2   29.62   18.93   4
  -6 -13   2   97.36   20.25   4
  -5 -13   2   11.84   17.68   4
   5 -13  -2   25.07   25.08   3
   5 -13  -2   13.39   16.09   4
   4 -13  -2   25.97   15.90   4
  -4 -13   2   17.79   20.89   4
   3 -13  -2   35.46   15.59   4
  -3 -13   2    3.75   18.31   4
   3 -13  -2   24.36   25.96   3
   2 -13  -2  421.83   39.42   3
   2 -13  -2  400.39   29.69   4
  -2 -13   2  388.75   31.28   4
  -1 -13   2   51.18   21.10   4
  -1 -13   2   79.11   24.23   3
   1 -13  -2   58.07   20.84   4
   1 -13  -2   41.18   25.76   3
   0 -13   2  166.47   18.17   4
   0 -13  -2  177.76   29.55   3
   0 -13  -2  134.59   21.48   4
   0 -13   2  149.51   26.10   3
   1 -13   2   11.73   12.56   3
   1 -13   2    4.10   11.20   4
  -1 -13  -2   14.09   20.08   3
  -1 -13  -2    2.69   43.88   4
   2 -13   2  118.24   19.34   4
   2 -13   2  123.01   23.45   3
  -2 -13  -2  118.91   26.86   3
  -2 -13  -2  149.38   20.45   4
   3 -13   2   16.65   20.18   3
   3 -13   2    1.71   33.79   4
  -3 -13  -2   14.03   15.41   4
  -3 -13  -2   27.30   25.80   3
  -4 -13  -2  258.60   26.30   4
   4 -13   2  225.99   27.44   3
   4 -13   2  201.70   21.26   4
   5 -13   2    3.41  285.62   3
  -5 -13  -2   -6.71   26.06   4
   6 -13   2  119.21   25.78   3
   6 -13   2  114.10   19.32   4
  -6 -13  -2  162.79   30.78   4
   7 -13   2   10.64   22.89   3
   7 -13   2   -8.21   12.22   4
  -7 -13  -2   49.68   30.51   4
   8 -13   2   33.11   19.81   4
  -8 -13  -2   75.99   32.80   4
  -9 -13  -2   28.81   34.22   4
  10 -13   2  143.94   24.40   4
 -10 -13  -2  160.79   35.78   4
  10 -14  -2   47.21   25.92   3
 -10 -14   2   50.09   38.32   4
  -9 -14   2   11.02   62.31   4
  -7 -14   2    8.88   46.09   4
   7 -14  -2   -4.87   13.31   3
  -6 -14   2  271.51   27.17   4
   6 -14  -2  236.05   26.73   3
   6 -14  -2  216.29   23.11   4
  -5 -14   2   99.07   22.35   4
   5 -14  -2   77.88   19.68   4
   5 -14  -2   72.33   25.08   3
   4 -14  -2  152.81   19.92   4
  -4 -14   2  182.05   23.39   4
   4 -14  -2  161.65   30.04   3
  -3 -14   2    7.52   16.70   4
   3 -14  -2    1.78   38.25   3
   2 -14  -2   69.16   21.90   4
   2 -14  -2   83.25   29.58   3
  -2 -14   2   16.24   61.01   4
  -1 -14   2   17.15   21.24   4
  -1 -14   2   54.02   24.53   3
   1 -14  -2   12.57   26.62   3
   1 -14  -2   24.71   22.60   4
   0 -14  -2   99.65   28.42   3
   0 -14  -2   64.32   24.59   4
   0 -14   2   97.62   19.09   4
   0 -14   2   82.45   24.52   3
  -1 -14  -2    4.46    8.94   4
  -1 -14  -2   -2.82   95.94   3
   1 -14   2   15.33   16.33   4
   1 -14   2   14.05   20.51   3
  -2 -14  -2  156.30   21.64   4
  -2 -14  -2  170.03   32.65   3
   2 -14   2  138.26   21.06   4
   2 -14   2  141.20   26.35   3
   3 -14   2   10.07   18.05   4
  -3 -14  -2   21.14   24.99   3
  -3 -14  -2   16.49   15.17   4
   4 -14   2   12.27   18.85   4
  -4 -14  -2   -7.03   16.28   4
   4 -14   2   34.85   26.82   3
   5 -14   2   21.63   22.44   3
   6 -14   2  235.11   30.13   3
   6 -14   2  204.75   24.89   4
  -6 -14  -2  280.16   35.84   4
   7 -14   2   39.16   25.26   3
   7 -14   2   20.62   21.27   4
  -7 -14  -2   68.74   36.72   4
   8 -14   2   66.88   20.88   4
  -8 -14  -2   87.20   34.80   4
  -9 -14  -2   32.65   23.49   4
  10 -14   2   17.21   25.50   4
  10 -15  -2   -0.73    5.92   3
   8 -15  -2    0.55    4.07   3
  -8 -15   2   13.73   42.23   4
   7 -15  -2    4.47  212.11   3
  -6 -15   2   97.85   25.76   4
   6 -15  -2   78.03   24.81   3
   5 -15  -2   -5.89   19.47   3
  -5 -15   2   28.48   22.95   4
   5 -15  -2    9.92   21.38   4
  -4 -15   2   30.24   20.00   4
   4 -15  -2    8.49   22.19   3
   4 -15  -2    7.17   17.46   4
   3 -15  -2   33.91   31.69   3
  -3 -15   2   14.11   28.62   4
   3 -15  -2    9.52   24.15   4
   2 -15  -2   99.50   32.47   3
   2 -15  -2   89.42   24.03   4
  -2 -15   2   93.77   23.80   4
   1 -15  -2   12.57   22.37   3
   0 -15   2   11.34   25.10   4
   0 -15  -2   43.76   22.14   4
   0 -15  -2   67.67   31.28   3
   0 -15   2   61.72   27.96   3
   1 -15   2   32.65   27.49   3
  -1 -15  -2   18.13   20.49   4
  -1 -15  -2   51.11   26.90   3
   1 -15   2   25.65   17.37   4
  -2 -15  -2   35.92   27.66   3
  -2 -15  -2   40.38   19.31   4
   2 -15   2   18.59   22.60   3
   2 -15   2   14.12   17.28   4
  -3 -15  -2   45.95   20.64   4
   3 -15   2    1.71   12.25   4
   3 -15   2    7.59   12.40   3
  -4 -15  -2   63.65   32.47   4
   4 -15   2   85.52   21.82   4
   4 -15   2   80.23   24.43   3
   5 -15   2   16.65   20.15   3
   5 -15   2    2.61   99.62   4
   6 -15   2   10.92   25.61   3
   7 -15   2   -5.66   15.60   4
  -7 -15  -2   13.14   26.68   4
   8 -15   2   40.61   24.81   4
   6 -16  -2    9.24   24.01   3
  -5 -16   2   79.18   26.56   4
   5 -16  -2   31.68   27.90   3
   4 -16  -2   94.32   29.58   3
  -4 -16   2  102.61   27.60   4
   3 -16  -2   31.74   24.20   3
  -3 -16   2   -2.26   18.69   4
   2 -16  -2   -6.20   20.11   4
  -2 -16   2   -2.01   18.62   4
   2 -16  -2   18.68   32.95   3
   1 -16  -2    4.93   37.78   4
   1 -16  -2   21.03   26.68   3
  -1 -16   2    5.66   31.44   4
   0 -16  -2   29.28   31.74   3
   0 -16  -2   22.37   20.92   4
   0 -16   2   -1.06    6.03   4
   1 -16   2   36.61   23.04   3
  -1 -16  -2   35.87   24.01   4
  -1 -16  -2   55.45   31.15   3
   1 -16   2   -6.72   19.17   4
   2 -16   2   53.64   21.63   4
   2 -16   2   41.40   24.69   3
  -2 -16  -2   62.97   22.19   4
  -2 -16  -2   37.35   30.72   3
   3 -16   2   40.01   24.73   3
   3 -16   2   50.00   21.07   4
  -3 -16  -2   63.98   23.26   4
   4 -16   2   27.05   23.67   3
   4 -16   2   23.86   21.64   4
  -4 -16  -2   -6.49   10.63   4
   5 -16   2   14.91   27.89   3
   5 -16   2    7.01   25.47   4
   6 -16   2   28.67   23.49   4
   6 -16   2   50.39   27.28   3
   1 -17  -2   46.84   24.42   4
   0 -17  -2   21.07   24.85   4
  -1 -17  -2   11.69   21.52   4
  -2 -17  -2   47.34   22.98   4
 -18   0   3    6.65   17.98   1
 -17   0   3  258.16   22.56   1
 -16   0   3   -1.71   12.23   1
  15   0  -3  300.24   42.21   3
 -15   0   3  321.06   23.04   1
  14   0  -3   90.45   28.77   3
 -14   0   3    6.95   11.73   1
  13   0  -3  129.04   29.18   3
 -13   0   3    8.55   11.23   1
 -12   0   3   -4.55   26.57   1
 -11   0   3  518.19   28.84   1
 -10   0   3    1.95   17.45   1
  -9   0   3  373.60   21.86   1
  -8   0   3   -3.53    6.49   1
  -7   0   3 1171.27   56.99   1
  -6   0   3    4.81    6.92   1
  -5   0   3 7976.47  391.94   1
  -4   0   3   17.27    6.35   4
  -3   0   3 2263.83  124.82   4
   3   0  -3 2316.83  126.92   2
   2   0  -3    7.47    5.26   2
  -2   0   3    2.25    1.99   4
   2   0  -3    0.01    2.79   4
   1   0  -3  105.83    9.53   2
   0   0  -3   -3.52    4.47   2
   0   0  -3    0.64    1.26   3
   0   0  -3    3.19    6.97   1
  -1   0  -3 4008.88  220.24   2
  -1   0  -3 3931.30  188.38   1
  -2   0  -3   -1.82    1.68   1
  -2   0  -3    5.48    8.07   2
  -3   0  -3  180.97   12.07   1
  -3   0  -3  231.36   16.40   2
  -4   0  -3    6.89   10.80   2
  -4   0  -3    0.38   13.29   1
  -5   0  -3 1252.28   67.96   2
  -5   0  -3 1145.11   57.99   1
  -6   0  -3    2.76   10.06   1
  -6   0  -3    7.86   16.53   2
  -7   0  -3 3331.51  147.34   1
  -7   0  -3 3102.60  171.92   2
   7   0   3 2820.47  229.36   3
  -8   0  -3    6.33   14.08   1
   8   0   3   88.47   18.91   3
  -8   0  -3   34.21   19.17   2
  -9   0  -3  693.53   44.33   2
  -9   0  -3  648.51   34.14   1
 -10   0  -3    8.18   10.76   2
 -10   0  -3   10.13   10.10   1
 -11   0  -3  158.47   24.67   2
 -11   0  -3  135.66   14.35   1
 -12   0  -3   -3.96   53.81   1
 -12   0  -3   55.94   24.12   2
 -13   0  -3  801.72   41.80   1
 -14   0  -3   15.35   15.00   1
 -15   0  -3   68.45   16.06   1
 -16   0  -3    4.89   17.49   1
 -18  -1   3    4.39   11.58   1
 -18   1   3    8.17   17.83   1
 -17   1   3   33.45   20.11   1
 -17  -1   3   58.39   19.35   1
 -16  -1   3   29.39   16.55   1
 -16   1   3   18.29   15.61   1
 -15  -1   3   22.23   14.06   1
 -15   1   3   -2.00   25.24   1
  15   1  -3  132.15   30.47   3
 -14  -1   3   11.54   12.44   1
 -14   1   3    7.80   16.54   1
  14  -1  -3   15.41   36.43   3
  13  -1  -3  382.61   44.07   3
 -13   1   3  338.04   21.55   1
 -13  -1   3  335.89   22.30   1
 -12   1   3   15.45   15.19   1
 -12  -1   3   35.95   14.64   1
  12  -1  -3   97.14   33.52   3
 -11  -1   3   77.00   16.00   1
 -11   1   3   54.38   14.46   1
  11  -1  -3  190.12   28.51   3
 -10   1   3  254.66   17.39   1
 -10  -1   3  218.94   18.57   2
 -10  -1   3  247.83   19.40   1
  -9  -1   3  275.86   22.04   2
  -9   1   3  363.84   20.98   1
  -9  -1   3  368.11   20.67   1
   9  -1  -3  448.70   35.18   3
  -8   1   3  134.27   12.48   1
   8  -1  -3  210.30   24.49   3
  -8  -1   3  111.33   12.93   1
   7  -1  -3 1386.95  108.89   3
  -7  -1   3 1457.09   69.23   1
  -7   1   3 1433.92   69.05   1
  -7  -1   3 1440.20   79.49   4
  -6  -1   3  341.32   22.58   4
  -6  -1   3  336.52   18.49   1
  -6   1   3  310.70   18.24   1
   6  -1  -3  378.77   32.26   3
  -5  -1   3 1791.38   84.50   1
  -5  -1   3 1813.74   96.92   4
   5  -1  -3 1684.91  132.66   3
   4   1  -3 1516.59   84.08   2
   4  -1  -3 1574.84  114.27   3
  -4  -1   3 1467.25   84.15   2
  -3  -1   3 5055.20  277.20   4
   3   1  -3 4520.95  276.72   2
   3  -1  -3 5339.57  282.80   2
  -2  -1   3  289.80   16.75   4
   2   1  -3  277.15   17.93   2
   2  -1  -3  287.35   23.86   3
   1  -1  -3 2180.57  105.73   2
  -1  -1   3 1624.88  103.60   4
   1  -1  -3 1961.75  141.79   3
   1   1  -3 1838.65  105.59   2
   0   1  -3 2858.94  152.85   2
   0  -1  -3 3067.52  152.90   2
   0  -1  -3 2759.65  130.80   1
   0  -1  -3 2332.59  204.76   3
  -1   1  -3  399.72   18.42   1
  -1  -1  -3  362.77   18.91   1
  -1  -1  -3  379.61   25.27   2
  -1   1  -3  345.48   24.67   2
  -1  -1  -3  341.30   28.43   3
  -2  -1  -3   40.81   11.54   2
  -2  -1  -3   34.21    8.11   1
  -2  -1  -3   35.56    7.62   3
  -2   1  -3   38.87   12.59   2
  -2   1  -3   44.01    6.94   1
  -3  -1  -3  499.36   26.76   1
  -3  -1  -3  554.49   32.00   2
  -3   1  -3  527.51   26.42   1
  -3   1  -3  580.20   31.79   2
   4  -1   3   18.68    5.81   3
  -4  -1  -3   16.97   10.38   1
  -4   1  -3   13.76   22.80   2
  -4  -1  -3   36.93   12.11   2
  -4   1  -3   31.12    7.06   1
  -5  -1  -3 3363.14  156.55   1
  -5  -1  -3 3356.62  182.69   2
  -5   1  -3 3408.99  156.24   1
  -5   1  -3 3518.84  182.65   2
   5  -1   3 2789.70  243.73   3
  -6   1  -3   19.89    7.74   1
  -6   1  -3   10.64   19.82   2
  -6  -1  -3   26.31   13.54   2
  -6  -1  -3   16.61   10.92   1
  -7   1  -3  138.66   20.56   2
  -7  -1  -3  141.61   13.86   1
  -7   1  -3  142.90   11.78   1
  -7  -1  -3  168.33   20.13   2
   7  -1   3   73.65   25.50   3
  -8  -1  -3   75.99   13.99   1
  -8  -1  -3  108.36   21.64   2
  -8   1  -3   57.00   11.54   1
  -8   1  -3   83.99   20.13   2
  -9  -1  -3  109.59   25.21   2
  -9  -1  -3   86.68   14.68   1
  -9   1  -3   79.63   23.20   2
  -9   1  -3   69.81   12.47   1
 -10  -1  -3  279.59   26.64   2
 -10  -1  -3  235.49   17.58   1
 -10   1  -3  226.88   16.49   1
 -10   1  -3  250.61   26.83   2
 -11   1  -3  190.93   14.32   1
 -11  -1  -3  148.84   15.77   1
 -11  -1  -3  196.85   25.93   2
 -11   1  -3  205.81   26.65   2
 -12   1  -3    1.85    4.11   1
 -12   1  -3   58.37   22.84   2
 -12  -1  -3   11.44    9.54   1
 -13   1  -3   16.13   10.88   1
 -13  -1  -3   15.23   15.89   1
 -14  -1  -3   99.24   17.06   1
 -14   1  -3   90.04   15.34   1
 -15   1  -3  305.87   22.20   1
 -15  -1  -3  312.78   22.45   1
 -16   1  -3   30.62   13.83   1
 -16  -1  -3   21.07   17.21   1
 -17   1  -3  134.64   22.28   1
 -19   2   3    3.31    8.55   1
 -18   2   3   10.55   13.25   1
 -18  -2   3    2.68   17.39   1
 -17   2   3   10.38   12.95   1
 -17  -2   3   14.63   14.35   1
 -16   2   3   93.04   16.86   1
 -16  -2   3  103.07   19.09   1
 -15  -2   3  224.02   21.06   1
 -15   2   3  250.34   19.64   1
 -14   2   3  143.49   16.88   1
  14  -2  -3  110.09   49.68   3
 -14  -2   3  139.51   18.22   1
 -13  -2   3   47.04   16.13   1
 -13   2   3   30.91   13.47   1
  13  -2  -3   -4.66   15.16   3
 -12   2   3   21.16   10.33   1
  12  -2  -3    3.31   53.01   3
 -12  -2   3    0.68    8.81   1
  11  -2  -3  137.13   40.94   3
 -11  -2   3  180.27   18.47   1
 -11   2   3  149.70   15.44   1
  10  -2  -3   44.96   34.08   3
 -10  -2   3    4.21   11.35   1
 -10   2   3    9.85    8.09   1
  -9   2   3  709.44   35.24   1
  -9  -2   3  610.46   39.14   2
  -9  -2   3  746.46   36.00   1
   9  -2  -3  799.49   58.12   3
  -8  -2   3  207.53   15.64   1
  -8  -2   3  234.22   20.72   4
   8  -2  -3  249.03   30.79   3
  -8   2   3  197.62   14.33   1
   7  -2  -3  312.32   31.90   3
  -7   2   3  311.94   17.57   1
  -7  -2   3  305.95   18.32   1
  -7  -2   3  312.00   22.94   4
  -6   2   3   95.79    9.48   1
  -6  -2   3   79.62   17.62   4
  -6  -2   3   84.23   11.01   1
   6  -2  -3   86.54   23.19   3
  -5  -2   3   42.74    8.70   1
  -5  -2   3   44.53   15.10   4
   5  -2  -3   43.99   24.02   3
  -4  -2   3  219.31   13.39   1
   4  -2  -3  206.79   25.20   3
  -4  -2   3  233.08   15.89   4
  -3  -2   3   11.79   35.54   4
   3  -2  -3   14.70   13.68   2
   3   2  -3   20.32    6.04   2
  -2   2   3   12.53    2.98   4
   2  -2  -3   37.73   10.97   3
   2  -2  -3   10.27   11.14   2
  -2  -2   3    4.68    7.43   4
   2  -2  -3    6.63    4.56   4
   1  -2  -3   55.54   19.45   3
  -1  -2   3   53.31   10.07   4
   1  -2  -3   56.29    7.44   4
   1  -2  -3   87.58    9.80   2
   0  -2  -3    7.11    9.07   4
   0  -2  -3   -2.92    7.41   1
   0  -2  -3   -8.26   11.33   2
   0  -2  -3    6.18    6.71   3
  -1   2  -3  212.19   10.75   1
  -1  -2  -3  230.83   16.31   2
  -1  -2  -3  182.37   18.99   3
   1  -2   3  202.52   16.59   3
  -1  -2  -3  197.51   15.32   4
  -1  -2  -3  180.19   12.92   1
  -2  -2  -3 1500.33   79.00   1
  -2   2  -3 1849.11   78.62   1
  -2  -2  -3 1507.86  123.24   3
   2  -2   3 1794.55  122.87   3
  -2  -2  -3 1547.91   90.78   4
  -2  -2  -3 1674.50   92.20   2
  -3  -2  -3 1414.95   72.71   1
  -3  -2  -3 1387.33  113.07   3
  -3   2  -3 1593.69   72.21   1
  -3  -2  -3 1614.56   84.99   2
   3  -2   3 1550.94  112.65   3
  -4  -2  -3   29.58   17.04   2
  -4   2  -3   50.57    6.80   1
   4  -2   3   45.69    7.16   3
  -4  -2  -3   35.62   11.54   1
  -5   2  -3  215.17   11.64   1
   5  -2   3  185.10   17.26   3
  -5  -2  -3  189.59   14.84   1
  -5  -2  -3  211.29   20.28   2
  -6   2  -3   32.78    7.85   1
  -6  -2  -3   31.91   11.45   1
   6  -2   3   27.10   12.14   3
  -6  -2  -3   21.38   17.08   2
  -7   2  -3   12.11  203.81   2
  -7  -2  -3   68.32   13.29   1
  -7   2  -3   45.84    9.79   1
  -7  -2  -3   43.42   20.98   2
   7  -2   3   44.23   14.88   3
  -8  -2  -3  499.18   27.82   1
  -8   2  -3  497.92   34.43   2
  -8   2  -3  511.06   26.00   1
  -8  -2  -3  494.84   36.10   2
   8  -2   3  500.17   40.76   3
  -9  -2  -3  300.92   20.22   1
  -9   2  -3  287.85   17.69   1
  -9   2  -3  298.22   28.82   2
  -9  -2  -3  298.66   31.06   2
 -10  -2  -3   41.03   23.09   2
 -10  -2  -3   47.82   14.26   1
 -10   2  -3   22.38   10.79   1
 -10   2  -3   31.29   21.98   2
 -11   2  -3  212.63   15.11   1
 -11  -2  -3  191.94   17.46   1
 -11   2  -3  213.93   27.78   2
 -12  -2  -3   14.09   13.15   1
 -12   2  -3   22.28   28.12   2
 -12   2  -3   20.02   11.04   1
 -13   2  -3  126.75   14.84   1
 -13  -2  -3  115.02   16.49   1
 -13   2  -3  159.22   28.13   2
 -14  -2  -3   38.07   15.29   1
 -14   2  -3   76.76   15.65   1
 -15   2  -3   50.27   16.27   1
 -15  -2  -3   61.43   17.31   1
 -16   2  -3   16.52   13.74   1
 -16  -2  -3   -9.32   11.97   1
 -17   2  -3   37.60   19.95   1
 -19   3   3   15.38   20.11   1
 -18  -3   3   50.41   25.06   1
 -18   3   3   56.33   18.12   1
 -17  -3   3   39.81   21.08   1
 -17   3   3   50.22   19.02   1
 -16   3   3   18.86   15.84   1
 -16  -3   3   -1.44    4.30   1
 -15   3   3    6.11   31.04   1
 -15  -3   3   -5.52   14.52   1
 -14   3   3   19.71   14.63   1
 -14  -3   3   17.97   18.60   1
 -13  -3   3  201.09   20.24   1
  13  -3  -3  168.02   53.28   3
 -13   3   3  218.29   16.43   1
 -12   3   3  174.41   15.22   1
 -12  -3   3  198.64   17.23   1
  12  -3  -3  101.94   48.62   3
 -11  -3   3  212.80   17.69   1
  11  -3  -3  112.09   47.48   3
 -11   3   3  168.87   15.23   1
 -10  -3   3   97.03   23.60   4
 -10   3   3   40.38   13.53   1
 -10  -3   3   54.20   15.78   1
  -9  -3   3   84.82   15.57   1
   9  -3  -3   59.58   48.69   3
  -9  -3   3  104.11   23.67   4
  -9   3   3   75.29   12.44   1
  -8  -3   3 1030.75   59.57   4
  -8  -3   3  986.21   50.78   1
   8  -3  -3 1105.12   81.96   3
  -8   3   3 1005.55   50.24   1
  -7  -3   3  321.30   18.76   1
  -7   3   3  341.58   17.80   1
   7  -3  -3  298.34   37.04   3
  -7  -3   3  309.12   26.35   4
  -6  -3   3 2011.67   98.60   1
  -6  -3   3 2032.75  113.50   4
   6  -3  -3 2001.31  154.79   3
  -6   3   3 2168.32   98.28   1
  -5  -3   3   68.02   10.41   1
   5  -3  -3   73.14   15.42   3
  -5  -3   3   70.15   14.27   4
  -4  -3   3   52.35   13.77   4
   4  -3  -3   58.19   13.06   3
  -4  -3   3   49.61    7.64   1
   3  -3  -3   30.68    6.44   4
   3  -3  -3   35.40   16.41   3
  -3  -3   3   39.98    9.72   4
  -3  -3   3   33.08    7.05   1
   2  -3  -3 1227.62   61.74   2
   2  -3  -3  982.41   82.93   3
   2  -3  -3 1127.84   59.88   4
  -2  -3   3 1034.62   60.36   4
  -1  -3   3 3829.37  208.94   4
   1  -3  -3 4324.72  208.70   4
   1  -3  -3 3848.53  212.58   2
   1  -3  -3 3320.64  285.37   3
   0  -3  -3  397.77   23.83   4
   0  -3   3  397.31   23.21   4
   0  -3  -3  350.93   20.00   1
   0  -3  -3  373.36   32.06   3
   0  -3   3  436.74   31.21   3
   0  -3  -3  435.36   24.03   2
  -1  -3  -3  181.37   13.18   1
  -1  -3  -3  189.32   17.17   4
   1  -3   3  214.65   17.54   3
  -1  -3  -3  180.44   20.25   3
  -1  -3  -3  192.92   16.78   2
  -2   3  -3  231.36   11.10   1
  -2  -3  -3  195.41   13.61   1
  -2  -3  -3  203.12   17.00   2
  -2  -3  -3  203.25   20.80   3
  -2  -3  -3  220.52   18.19   4
   2  -3   3  218.71   18.37   3
  -3  -3  -3  353.98   20.28   1
   3  -3   3  403.18   29.54   3
  -3  -3  -3  384.06   24.68   2
  -3  -3  -3  355.11   30.78   3
  -3  -3  -3  383.90   25.47   4
  -3   3  -3  400.14   18.87   1
  -4  -3  -3 1526.57   85.54   2
  -4  -3  -3 1462.22   73.42   1
  -4   3  -3 1590.29   72.60   1
  -4  -3  -3 1440.81   84.65   4
   4  -3   3 1563.65  113.48   3
  -5   3  -3 1624.50   76.44   1
  -5  -3  -3 1535.85   77.38   1
   5  -3   3 1656.48  119.37   3
  -5  -3  -3 1565.93   89.96   2
   6  -3   3  460.82   35.61   3
  -6   3  -3  490.14   23.33   1
  -6  -3  -3  430.67   32.74   2
  -6  -3  -3  443.97   25.32   1
  -7   3  -3  539.06   26.46   1
   7  -3   3  500.37   40.40   3
  -7  -3  -3  537.23   28.78   1
  -7  -3  -3  523.78   37.68   2
  -8   3  -3  274.14   15.39   1
   8  -3   3  215.91   25.25   3
  -8  -3  -3  249.50   20.06   1
  -8  -3  -3  206.89   31.40   2
  -9  -3  -3  165.99   28.92   2
  -9   3  -3  148.93   26.68   2
  -9   3  -3  180.00   13.37   1
  -9  -3  -3  192.81   18.47   1
 -10   3  -3  285.06   30.52   2
 -10  -3  -3  315.52   21.00   1
 -10  -3  -3  279.17   28.72   2
 -10   3  -3  288.00   17.46   1
 -11   3  -3   92.86   28.05   2
 -11  -3  -3   55.09   15.85   1
 -11   3  -3   66.66   11.64   1
 -12   3  -3  119.17   13.89   1
 -12   3  -3   90.12   26.34   2
 -12  -3  -3  103.70   18.05   1
 -13  -3  -3   53.35   17.30   1
 -13   3  -3   36.98   14.04   1
 -13   3  -3   55.20   25.09   2
 -14  -3  -3   42.13   18.70   1
 -14   3  -3   45.93   15.86   1
 -15  -3  -3   84.91   20.99   1
 -15   3  -3   82.92   18.87   1
 -16   3  -3  112.84   20.39   1
 -16  -3  -3   93.71   22.27   1
 -17  -4   3   95.85   23.14   1
 -17   4   3   83.33   18.71   1
 -16   4   3  133.81   18.75   1
 -16  -4   3  140.74   22.78   1
 -15  -4   3   10.31   23.08   1
 -15   4   3   -5.28   45.14   1
  14  -4  -3  411.64   40.37   3
 -14   4   3  378.70   23.76   1
 -14  -4   3  433.49   25.97   1
 -13   4   3   87.92   14.60   1
  13  -4  -3  137.85   26.51   3
 -13  -4   3  102.66   17.05   1
  12  -4  -3   47.41   19.66   3
 -12  -4   3   16.18   11.03   1
 -12   4   3    6.18   15.69   1
 -11  -4   3  828.95   41.41   1
 -11  -4   3  748.52   50.68   4
 -11   4   3  788.08   40.10   1
  11  -4  -3  799.23   63.86   3
 -10   4   3  245.44   17.91   1
 -10  -4   3  267.16   21.21   1
  10  -4  -3  295.96   32.75   3
 -10  -4   3  280.23   29.82   4
  -9  -4   3  744.96   37.39   1
  -9   4   3  726.15   36.30   1
  -9  -4   3  679.98   47.40   4
   9  -4  -3  727.28   57.97   3
  -8  -4   3    3.49   51.31   1
  -8  -4   3    6.66   14.51   4
  -8   4   3    2.93    5.14   1
   8  -4  -3   33.78   17.17   3
   7  -4  -3  205.22   22.87   3
  -7  -4   3  184.02   25.59   4
  -7  -4   3  187.28   14.95   1
  -7   4   3  191.08   12.70   1
   6  -4  -3  116.54   18.74   3
  -6  -4   3   97.33   11.04   1
  -6  -4   3   94.66   18.55   4
  -6   4   3  106.14    8.88   1
  -5  -4   3  107.06   10.77   1
  -5  -4   3  102.68   16.26   4
   5  -4  -3  110.09   19.09   3
  -4  -4   3 2767.12  147.79   4
   4  -4  -3 2781.21  201.80   3
   4  -4  -3 2526.64  146.98   4
  -4  -4   3 2710.33  128.35   1
  -3  -4   3  799.96   38.52   1
  -3  -4   3  808.20   44.64   4
   3  -4  -3  779.05   61.47   3
   3  -4  -3  795.63   44.01   4
   2  -4  -3  132.55   21.32   3
   2  -4  -3  146.45    9.83   4
  -2  -4   3  114.19   11.42   4
   2  -4  -3  130.04   12.73   2
  -2  -4   3  132.45    8.06   1
   1  -4  -3  169.80   13.86   2
   1  -4  -3  181.53   12.75   4
  -1  -4   3  159.10   13.10   4
   1  -4  -3  136.81   18.42   3
   0  -4  -3  124.84    9.25   1
   0  -4  -3  124.11   14.12   2
   0  -4  -3  142.49   11.60   4
   0  -4   3  130.35   12.48   4
   0  -4  -3  105.25   18.54   3
   0  -4   3  139.04   15.12   3
  -1  -4  -3  280.55   15.69   1
  -1  -4  -3  272.30   25.83   3
  -1  -4  -3  267.43   19.70   2
   1  -4   3  318.92   23.96   3
   1  -4   3  290.39   18.03   4
  -1  -4  -3  264.60   20.13   4
  -2   4  -3  908.70   40.62   1
   2  -4   3  919.15   64.45   3
  -2  -4  -3  838.95   41.71   1
  -2  -4  -3  782.63   48.71   4
  -2  -4  -3  813.20   48.63   2
  -2  -4  -3  807.54   65.29   3
  -3  -4  -3  790.22   62.86   3
  -3  -4  -3  786.62   47.80   2
  -3  -4  -3  763.63   47.67   4
  -3  -4  -3  813.86   40.35   1
   3  -4   3  855.50   61.88   3
  -3   4  -3  861.48   39.19   1
  -4  -4  -3  465.68   29.68   2
   4  -4   3  458.01   35.21   3
  -4  -4  -3  447.17   24.30   1
  -4   4  -3  454.98   22.30   1
  -4  -4  -3  453.02   30.45   4
   5  -4   3   15.89    8.95   3
  -5  -4  -3   47.07   16.49   4
  -5  -4  -3    6.16   14.93   2
  -5  -4  -3   17.54   15.16   1
  -5   4  -3   12.13    5.63   1
  -6  -4  -3 1003.63   51.49   1
  -6  -4  -3 1077.51   60.15   2
  -6  -4  -3  956.45   60.77   4
  -6   4  -3 1064.18   49.88   1
   6  -4   3 1034.15   77.80   3
  -7  -4  -3  865.17   51.58   2
  -7   4  -3  849.57   42.36   1
   7  -4   3  882.57   65.81   3
  -7  -4  -3  864.38   44.37   1
  -8  -4  -3  353.19   24.23   1
   8  -4   3  316.84   28.96   3
  -8   4  -3  365.99   18.84   1
  -8  -4  -3  346.94   28.77   2
  -9  -4  -3   76.80   17.48   2
  -9   4  -3   54.70   10.66   1
  -9  -4  -3   62.90   17.46   1
 -10  -4  -3   46.91   17.39   1
 -10   4  -3   65.58   10.98   1
 -11   4  -3    8.05    9.23   1
 -11  -4  -3   -4.52   17.09   1
 -12   4  -3  102.57   28.69   2
 -12  -4  -3   92.13   18.45   1
 -12   4  -3   83.58   14.06   1
 -13   4  -3  139.85   29.79   2
 -13   4  -3  171.37   17.47   1
 -13  -4  -3  163.46   20.22   1
 -14  -4  -3   94.45   21.69   1
 -14   4  -3  105.68   19.62   1
 -14   4  -3   83.00   31.94   2
 -15  -4  -3   47.45   24.14   1
 -16  -4  -3   -8.18   23.32   1
 -17  -5   3   -6.81   25.70   1
 -16  -5   3   -7.20    9.77   1
 -15   5   3    0.09    2.99   1
 -15  -5   3   -5.70   15.78   1
  14  -5  -3  141.53   30.36   3
 -14  -5   3  153.04   18.86   1
 -14   5   3  146.09   16.85   1
 -13  -5   3  133.17   17.55   1
 -13   5   3  134.52   14.47   1
  13  -5  -3  154.18   29.96   3
 -12   5   3  302.39   19.29   1
 -12  -5   3  396.45   35.51   4
 -12  -5   3  322.87   22.26   1
  12  -5  -3  314.90   34.64   3
 -11  -5   3  113.64   16.65   1
 -11   5   3  113.77   12.33   1
 -11  -5   3  149.43   28.53   4
  11  -5  -3  110.13   25.61   3
 -10  -5   3   34.94   12.90   1
 -10  -5   3   83.27   25.47   4
  10  -5  -3   65.75   26.29   3
 -10   5   3   29.80   11.78   1
   9  -5  -3   23.89   22.43   3
  -9   5   3    7.69   11.12   1
  -9  -5   3    9.13   11.62   1
  -9  -5   3    9.79   14.63   4
   8  -5  -3  332.79   34.73   3
  -8  -5   3  334.32   34.79   4
  -8   5   3  362.26   19.07   1
  -8  -5   3  347.65   21.18   1
   7  -5  -3   25.45   22.10   3
  -7  -5   3   40.09   12.09   1
  -7   5   3   50.00    9.20   1
  -7  -5   3   16.76   52.63   4
   6  -5  -3  791.64   65.49   3
  -6  -5   3  791.02   48.19   4
  -6  -5   3  890.29   41.79   1
  -6   5   3  885.26   40.99   1
  -5  -5   3   57.10   16.60   4
   5  -5  -3   53.52    9.21   4
  -5  -5   3   63.52    9.16   1
   5  -5  -3   33.59   23.96   3
  -4  -5   3    9.94    8.60   1
   4  -5  -3   11.68    8.75   4
  -4  -5   3   -1.12    2.81   4
   4  -5  -3   -4.80    8.41   3
  -3  -5   3   45.38   11.28   4
   3  -5  -3   42.58    8.61   4
   3  -5  -3   38.88   15.94   3
  -3  -5   3   36.06    7.58   1
  -2  -5   3  207.87   11.22   1
   2  -5  -3  181.53   23.15   3
  -2  -5   3  190.05   15.59   4
   2  -5  -3  214.92   13.84   4
  -1  -5   3 1527.32  120.37   3
   1  -5  -3 1511.25  120.53   3
  -1  -5   3 1454.52   75.87   1
  -1  -5   3 1724.02   88.30   4
   1  -5  -3 1764.63   87.98   4
   1  -5  -3 1610.51   89.77   2
   0  -5  -3  272.78   18.02   4
   0  -5  -3  251.70   18.80   2
   0  -5   3  295.43   23.79   3
   0  -5  -3  271.19   14.09   1
   0  -5  -3  243.97   25.40   3
   0  -5   3  312.46   17.74   4
   0  -5   3  210.83   12.19   1
  -1  -5  -3  126.46   13.96   4
   1  -5   3  123.84   11.93   4
  -1  -5  -3  107.25   16.29   2
   1  -5   3  128.78   16.34   3
  -1  -5  -3   92.27   20.24   3
  -1  -5  -3  118.39    9.92   1
   2  -5   3  325.87   26.24   3
  -2  -5  -3  297.12   17.41   1
   2  -5   3  350.97   20.35   4
  -2  -5  -3  314.92   28.77   3
  -2  -5  -3  306.71   21.77   2
  -2  -5  -3  270.06   24.00   4
   3  -5   3   80.72   12.83   3
  -3  -5  -3   78.28   13.15   2
  -3   5  -3   82.27    5.32   1
  -3  -5  -3   64.46   20.46   4
  -3  -5  -3   78.99   11.35   1
  -3  -5  -3   90.85   18.70   3
  -4  -5  -3  452.37   41.60   3
   4  -5   3  515.56   39.73   3
  -4  -5  -3  534.72   26.79   1
  -4   5  -3  514.38   24.83   1
  -4  -5  -3  552.84   31.38   2
  -4  -5  -3  490.12   35.74   4
  -5  -5  -3   77.71   23.55   2
  -5  -5  -3   83.26   14.30   1
  -5   5  -3   74.12    6.66   1
   5  -5   3   86.27   13.79   3
  -5  -5  -3  113.33   21.92   4
  -6   5  -3  589.55   28.65   1
   6  -5   3  588.94   45.06   3
  -6  -5  -3  579.16   38.88   2
  -6  -5  -3  509.35   40.41   4
  -6  -5  -3  604.03   31.59   1
   7  -5   3   14.74   16.74   3
  -7  -5  -3   18.11   17.97   1
  -7  -5  -3   80.09   25.57   4
  -7  -5  -3    1.46   14.95   2
  -7   5  -3   18.35    7.16   1
  -8  -5  -3  335.71   29.53   2
   8  -5   3  361.81   30.30   3
  -8  -5  -3  358.93   23.94   1
  -8   5  -3  378.52   19.55   1
  -9  -5  -3   18.20   13.75   1
  -9   5  -3   19.69    9.27   1
 -10   5  -3   87.36   11.59   1
 -10  -5  -3   79.34   18.13   1
 -11  -5  -3  259.17   21.79   1
 -11   5  -3  256.65   17.65   1
 -12   5  -3   64.09   30.86   2
 -12  -5  -3   67.01   20.83   1
 -13  -5  -3    6.31  581.83   1
 -14   5  -3   35.62   33.89   2
 -14  -5  -3   41.67   25.42   1
 -15  -5  -3    8.65   15.02   1
 -17  -6   3   -7.82   14.08   1
 -16  -6   3   90.92   22.08   1
 -15  -6   3   19.25   20.48   1
 -14  -6   3   61.83   17.75   1
  14  -6  -3   36.93   32.58   3
 -13  -6   3   63.97   24.90   4
 -13   6   3   -0.77    4.12   1
  13  -6  -3    3.42   17.49   3
 -12  -6   3   83.77   28.10   4
 -12  -6   3   12.31   18.74   1
 -12   6   3   14.40   10.42   1
  12  -6  -3   37.30   24.47   3
 -11   6   3    5.99   15.73   1
 -11  -6   3   45.65   23.48   4
 -11  -6   3   -6.31    6.79   1
  11  -6  -3    9.76   34.91   3
 -10   6   3  816.50   40.46   1
 -10  -6   3  772.26   41.63   1
  10  -6  -3  803.55   64.77   3
 -10  -6   3  863.12   54.07   4
   9  -6  -3   95.16   29.07   3
  -9   6   3  117.11   11.79   1
  -9  -6   3  120.48   30.73   4
  -9  -6   3  101.45   16.57   1
  -8  -6   3  368.90   22.91   1
  -8  -6   3  361.31   36.70   4
   8  -6  -3  384.53   37.58   3
  -8   6   3  371.63   20.07   1
   7  -6  -3  394.10   39.83   3
  -7   6   3  473.71   22.68   1
  -7  -6   3  430.12   35.80   4
   7  -6  -3  447.87   26.96   4
  -7  -6   3  429.21   24.37   1
  -6   6   3  218.12   12.30   1
   6  -6  -3  183.53   28.15   3
   6  -6  -3  202.16   16.13   4
  -6  -6   3  215.71   20.85   4
  -6  -6   3  204.99   14.60   1
  -5  -6   3   -0.55    5.87   4
   5  -6  -3    1.36   71.52   4
  -5  -6   3    6.15    6.98   1
   4  -6  -3 1562.70   82.06   4
  -4  -6   3 1608.18   71.56   1
  -4  -6   3 1461.74   82.82   4
   4  -6  -3 1307.54  112.66   3
   3  -6  -3  183.94   13.95   4
   3  -6  -3  170.56   22.09   3
  -3  -6   3  208.09   11.21   1
  -3  -6   3  187.11   16.37   4
   2  -6  -3  427.78   25.17   4
  -2  -6   3  431.58   21.07   1
  -2  -6   3  417.40   26.16   4
   2  -6  -3  427.77   36.51   3
  -1  -6   3   14.82   16.98   4
  -1  -6   3   35.96   15.02   3
   1  -6  -3   15.31   22.67   3
   1  -6  -3    7.00   12.38   4
  -1  -6   3   10.47    4.37   1
   0  -6  -3 1726.35  134.15   3
   0  -6   3 1894.15   98.10   4
   0  -6  -3 1709.18   97.80   4
   0  -6  -3 1773.95   99.85   2
   0  -6   3 1715.97  133.75   3
   0  -6  -3 1826.69   84.95   1
  -1  -6  -3  410.72   35.44   3
  -1  -6  -3  407.67   26.01   4
   1  -6   3  418.55   33.99   3
  -1  -6  -3  396.02   26.84   2
  -1  -6  -3  418.78   21.24   1
   1  -6   3  423.98   25.10   4
  -2  -6  -3 1356.69   78.44   2
  -2  -6  -3 1416.81   67.00   1
  -2  -6  -3 1328.66   77.37   4
   2  -6   3 1487.33   76.94   4
  -2  -6  -3 1318.74  105.48   3
   2  -6   3 1390.40  104.45   3
  -3  -6  -3  201.14   26.48   3
  -3  -6  -3  182.11   13.56   1
   3  -6   3  190.75   15.76   4
   3  -6   3  160.79   19.26   3
  -3  -6  -3  184.48   24.29   4
  -3  -6  -3  196.49   18.47   2
  -4  -6  -3  389.46   38.26   3
  -4  -6  -3  469.44   23.94   1
  -4  -6  -3  446.92   28.60   2
  -4  -6  -3  423.06   34.55   4
  -4   6  -3  434.32   20.89   1
   4  -6   3  412.60   34.83   3
  -5  -6  -3    4.39  140.00   4
  -5   6  -3   10.67    5.29   1
   5  -6   3   10.41   16.53   3
  -5  -6  -3   22.59   15.29   2
  -5  -6  -3    2.47  134.94   1
  -6  -6  -3  328.86   34.03   4
  -6  -6  -3  334.00   24.24   2
   6  -6   3  330.11   28.27   3
  -6   6  -3  309.81   16.62   1
  -6  -6  -3  376.19   22.49   1
   7  -6   3   85.41   16.55   3
  -7  -6  -3  129.12   24.84   4
  -7  -6  -3   99.27   15.72   2
  -7   6  -3   82.27    8.66   1
  -7  -6  -3   60.78   16.71   1
  -8  -6  -3  579.60   43.76   4
  -8  -6  -3  607.95   33.43   1
  -8   6  -3  667.33   30.60   1
   8  -6   3  600.72   47.66   3
  -8  -6  -3  564.91   36.44   2
  -9  -6  -3   -0.66    8.11   1
 -10  -6  -3   34.30   19.42   1
 -11  -6  -3  112.95   20.07   1
 -12  -6  -3  297.94   24.61   1
 -13  -6  -3    0.47    1.74   1
 -14  -6  -3  319.01   27.62   1
 -14   6  -3  301.30   38.31   2
 -15  -6  -3   13.39   20.80   1
 -16  -7   3   17.97   16.00   1
 -15  -7   3   17.32   18.97   1
 -14  -7   3  228.79   22.37   1
 -13  -7   3   50.20   28.62   4
 -13  -7   3   17.19   21.71   1
 -12  -7   3  167.72   17.55   1
 -12  -7   3  179.91   33.43   4
  12  -7  -3  132.07   28.15   3
  11  -7  -3   -7.19   17.53   3
 -11  -7   3   32.29   28.46   4
 -11  -7   3   -1.10    6.06   1
 -10   7   3   11.73   10.69   1
 -10  -7   3    9.93   11.42   1
 -10  -7   3   13.54   18.62   4
  10  -7  -3   -4.21   11.91   3
  -9  -7   3   68.16   14.19   1
   9  -7  -3   45.37   25.24   3
  -9   7   3   97.19   10.81   1
  -9  -7   3   69.71   31.90   4
  -8   7   3  424.17   22.20   1
   8  -7  -3  453.24   26.31   4
  -8  -7   3  424.26   23.97   1
   8  -7  -3  379.58   41.34   3
  -8  -7   3  393.71   39.24   4
   7  -7  -3    3.96   11.67   3
  -7   7   3    2.36    9.78   1
   7  -7  -3   13.59   11.63   4
  -7  -7   3   16.72   12.82   4
  -7  -7   3   -1.55   15.15   1
  -6   7   3  595.44   30.37   1
  -6  -7   3  682.02   31.42   1
   6  -7  -3  619.13   35.75   4
  -6  -7   3  620.77   38.66   4
   6  -7  -3  556.62   50.03   3
   5  -7  -3    3.51   27.09   3
  -5  -7   3    0.10    0.42   1
   5  -7  -3   -4.64    7.33   4
  -5  -7   3    3.58    7.12   4
   4  -7  -3   33.43   19.35   3
   4  -7  -3   25.04   10.27   4
  -4  -7   3   25.30    7.41   1
   3  -7  -3   27.33   19.52   3
  -3  -7   3   14.82   11.84   4
   3  -7  -3   26.50   11.95   4
  -3  -7   3   20.14    6.77   1
   2  -7  -3 2103.66  152.62   3
  -2  -7   3 2001.71   95.93   1
  -2  -7   3 1996.04  111.39   4
   2  -7  -3 1967.63  110.84   4
  -1  -7   3  167.54   17.43   4
   1  -7  -3  160.66   16.77   4
   1  -7  -3  178.53   24.54   3
  -1  -7   3  151.65    8.34   1
  -1  -7   3  202.06   21.79   3
   0  -7   3 1733.12   92.52   4
   0  -7  -3 1663.14  126.78   3
   0  -7  -3 1622.40   92.31   4
   0  -7   3 1609.31  126.23   3
   0  -7  -3 1708.78   79.95   1
  -1  -7  -3   33.23   24.84   3
  -1  -7  -3   31.70   14.70   2
  -1  -7  -3   45.68    9.80   1
   1  -7   3   34.79   13.16   4
   1  -7   3   23.84   18.78   3
  -1  -7  -3   43.42   13.21   4
   2  -7   3  115.41   17.22   3
  -2  -7  -3  124.82   20.86   3
   2  -7   3  109.23   15.74   4
  -2  -7  -3  128.89   11.08   1
  -2  -7  -3  149.12   18.12   4
  -2  -7  -3  114.35   18.97   2
   3  -7   3   -2.96  206.23   3
  -3  -7  -3    0.94    6.80   2
   3  -7   3    4.81    8.82   4
  -3  -7  -3    1.15    7.15   1
  -3  -7  -3    8.67   13.27   3
   4  -7   3  970.73   53.34   4
  -4  -7  -3  923.08   73.71   3
  -4  -7  -3  925.86   57.27   4
  -4  -7  -3  910.47   46.64   1
  -4  -7  -3  980.87   54.96   2
   4  -7   3  910.61   71.73   3
   5  -7   3   -0.72    3.55   3
  -5  -7  -3   -0.86    2.28   4
   5  -7   3   18.51   14.57   4
  -5  -7  -3    1.95    5.52   1
  -6  -7  -3  150.79   29.80   4
  -6  -7  -3  140.96   17.17   1
   6  -7   3  103.71   17.96   3
  -6  -7  -3  120.55   18.82   2
  -7  -7  -3   -3.82   12.82   1
  -7  -7  -3   33.75   25.55   4
   7  -7   3    0.54   11.21   3
  -7  -7  -3    3.58   57.91   2
  -8  -7  -3   94.70   25.77   4
   8  -7   3   44.87   16.46   3
  -8  -7  -3   48.92   18.26   1
  -9  -7  -3  172.39   32.86   4
  -9  -7  -3   95.43   20.96   1
 -10  -7  -3 1045.75   54.80   1
 -11  -7  -3   -4.73   21.78   1
 -12  -7  -3  195.31   24.55   1
 -13  -7  -3   46.72   24.64   1
 -14  -7  -3   86.88   23.79   1
 -16  -8   3   35.97   23.92   1
 -14  -8   3   26.98   19.47   1
 -14  -8   3  108.30   31.60   4
 -13  -8   3   88.25   17.24   1
 -13  -8   3  150.55   33.24   4
  13  -8  -3  103.82   22.73   3
 -12  -8   3    1.71   62.32   1
  12  -8  -3   33.74   22.61   3
 -12  -8   3   67.51   27.31   4
  11  -8  -3   28.84   20.93   3
 -11  -8   3   15.87   13.50   1
 -11  -8   3   99.79   33.87   4
  11  -8  -3   29.14   15.26   4
 -10  -8   3  399.19   26.32   1
 -10  -8   3  536.16   40.70   4
  10  -8  -3  459.03   28.96   4
  10  -8  -3  516.32   39.76   3
   9  -8  -3   17.48   17.57   3
   9  -8  -3   30.52   11.38   4
  -9  -8   3   21.06   67.48   4
  -9  -8   3   29.85   13.20   1
   8  -8  -3  180.74   24.20   3
   8  -8  -3  229.12   16.77   4
  -8  -8   3  202.78   14.85   1
  -8  -8   3  174.81   31.39   4
   7  -8  -3  373.50   23.55   4
  -7  -8   3  374.11   28.72   4
   7  -8  -3  352.54   33.46   3
  -7  -8   3  342.23   20.47   1
  -6   8   3   92.65    9.55   1
  -6  -8   3   95.21   12.01   1
   6  -8  -3  108.82   23.62   3
  -6  -8   3  139.55   21.52   4
   6  -8  -3  102.39   15.75   4
   5  -8  -3    0.93    3.04   4
  -5  -8   3   -6.33   14.09   4
   5  -8  -3   -5.92   31.28   3
  -5  -8   3   20.47    8.93   1
   4  -8  -3  341.72   22.94   4
   4  -8  -3  309.33   33.96   3
  -4  -8   3  370.30   18.12   1
  -4  -8   3  306.93   27.79   4
   3  -8  -3    6.32   17.05   4
  -3  -8   3   28.09   12.28   4
   3  -8  -3    5.43  271.15   3
  -3  -8   3   16.91    7.65   1
  -2  -8   3   14.14   13.34   4
  -2  -8   3   12.37    5.62   1
   2  -8  -3    8.51   11.62   4
   2  -8  -3    3.67   38.35   3
  -2  -8   3   47.68   20.77   3
  -1  -8   3   29.60   17.59   3
   1  -8  -3   -8.77   11.30   4
  -1  -8   3    7.16    3.31   1
  -1  -8   3   17.25   16.12   4
   1  -8  -3    9.94   31.02   3
   0  -8  -3  487.40   42.37   3
   0  -8  -3  450.57   30.86   4
   0  -8   3  484.74   40.00   3
   0  -8   3  471.88   30.85   4
   1  -8   3  132.10   22.98   3
   1  -8   3  157.62   16.65   4
  -1  -8  -3  168.94   19.14   4
  -1  -8  -3  170.91   11.23   1
  -1  -8  -3  158.63   27.07   3
  -2  -8  -3 1181.79   55.10   1
  -2  -8  -3 1066.13   63.83   4
   2  -8   3 1168.70   63.79   4
  -2  -8  -3 1163.16   87.89   3
   2  -8   3 1056.78   86.15   3
  -3  -8  -3   34.19   11.08   1
   3  -8   3   15.37   12.91   3
  -3  -8  -3   12.51   17.73   2
   3  -8   3   25.75   16.41   4
  -3  -8  -3   37.35   24.79   3
  -4  -8  -3  315.46   35.18   3
  -4  -8  -3  319.67   35.23   4
  -4  -8  -3  316.36   19.77   1
   4  -8   3  302.92   29.02   3
   4  -8   3  318.99   23.51   4
  -4  -8  -3  311.93   26.52   2
  -5  -8  -3   16.70   11.94   1
   5  -8   3   31.57   14.08   4
  -5  -8  -3    0.56   18.78   2
  -5  -8  -3    0.80    3.99   4
   5  -8   3   16.76   12.06   3
  -6  -8  -3   69.15   14.10   1
  -6  -8  -3   75.46   18.50   2
  -6  -8  -3  100.94   26.70   4
   6  -8   3   90.49   15.70   4
   6  -8   3   87.37   16.20   3
   7  -8   3   28.28   14.75   4
   7  -8   3    2.03   17.00   3
  -7  -8  -3   10.98   13.41   2
  -7  -8  -3   36.94   19.87   4
  -8  -8  -3  153.90   18.51   1
  -8  -8  -3  164.62   29.44   4
  -9  -8  -3   52.38   26.91   4
  -9  -8  -3    1.19    8.95   1
 -10  -8  -3    4.15    8.73   1
 -11  -8  -3   22.43   40.93   1
 -12  -8  -3  162.65   24.84   1
 -13  -8  -3    6.76   26.70   1
 -14  -8  -3  183.01   26.64   1
 -14   8  -3   75.31   37.28   2
 -16  -9   3    5.63   12.44   1
 -15  -9   3   16.38   14.08   1
 -14  -9   3  108.60   19.36   1
 -14  -9   3  160.05   40.42   4
 -13  -9   3  113.91   35.05   4
 -13  -9   3   44.41   16.26   1
  13  -9  -3   42.98   24.26   3
 -12  -9   3  212.33   18.85   1
  12  -9  -3  235.39   28.25   3
 -12  -9   3  337.03   36.36   4
 -11  -9   3   61.65   33.10   4
  11  -9  -3   19.78   13.72   4
 -11  -9   3   18.33   13.58   1
  11  -9  -3   43.57   20.07   3
 -10  -9   3   27.45   27.33   4
 -10  -9   3   25.59   14.24   1
  10  -9  -3   15.14   13.61   4
  10  -9  -3   41.03   19.58   3
  -9  -9   3   14.06   36.62   4
  -9  -9   3   49.64   12.12   1
   9  -9  -3   49.42   19.41   3
   9  -9  -3   31.44   13.95   4
  -8  -9   3   19.60   45.70   4
   8  -9  -3   66.73   14.30   4
   8  -9  -3   62.81   21.81   3
  -8  -9   3   75.29   11.87   1
   7  -9  -3   54.55   13.33   4
  -7  -9   3   66.39   11.09   1
   7  -9  -3   74.60   20.75   3
  -7  -9   3   92.93   19.60   4
   6  -9  -3  218.42   26.12   3
  -6  -9   3  219.70   22.69   4
   6  -9  -3  195.67   17.45   4
  -6  -9   3  220.67   14.02   1
  -5  -9   3    9.86    7.94   1
  -5  -9   3   -8.32   46.11   4
   5  -9  -3   15.27   27.15   3
   5  -9  -3    4.95   13.72   4
   4  -9  -3   70.94   24.37   3
  -4  -9   3   38.87    8.84   1
  -4  -9   3    7.51   49.36   4
   4  -9  -3   46.13   15.61   4
   3  -9  -3  177.66   28.51   3
   3  -9  -3  158.51   17.33   4
  -3  -9   3  150.86   10.30   1
  -3  -9   3  120.02   23.47   4
   2  -9  -3   59.43   34.60   3
   2  -9  -3   87.53   14.74   4
  -2  -9   3  115.90   29.12   3
  -2  -9   3   84.40   18.33   4
  -1  -9   3  946.16   70.71   3
   1  -9  -3  867.26   51.50   4
   1  -9  -3  932.26   71.69   3
  -1  -9   3  827.88   51.33   4
   0  -9  -3  132.59   30.53   3
   0  -9  -3  129.13   20.42   4
   0  -9   3  137.95   19.30   4
   0  -9   3  133.14   22.41   3
  -1  -9  -3   44.41   10.57   1
   1  -9   3   42.24   18.52   4
   1  -9   3   53.82   20.63   3
  -1  -9  -3   42.51   20.20   4
  -1  -9  -3   42.79   27.87   3
   2  -9   3   -0.75  422.70   4
  -2  -9  -3    6.68   21.18   1
  -2  -9  -3   44.39   17.26   4
  -2  -9  -3   -6.24   47.20   3
   2  -9   3    3.60   11.37   3
  -3  -9  -3   51.56   10.73   1
  -3  -9  -3   48.90   28.87   3
   3  -9   3   37.48   16.63   4
  -3  -9  -3   31.35   28.63   4
   3  -9   3   28.10   18.88   3
  -4  -9  -3   63.52   25.04   3
   4  -9   3   51.97   15.76   4
   4  -9   3   46.84   16.82   3
  -4  -9  -3   45.91   31.20   4
  -4  -9  -3   47.82   12.52   1
  -5  -9  -3   37.57   12.79   1
   5  -9   3   80.18   16.10   4
   5  -9   3   34.30   16.49   3
  -5  -9  -3   34.42   36.19   4
  -5  -9  -3   49.53   19.64   2
  -6  -9  -3   29.70   17.05   2
   6  -9   3   46.47   15.86   4
  -6  -9  -3   45.43   28.23   4
   6  -9   3   25.21   15.92   3
  -6  -9  -3   18.85   11.72   1
   7  -9   3   -5.34   21.26   3
   7  -9   3    2.62    7.96   4
  -7  -9  -3   -2.18   27.46   1
  -7  -9  -3   15.11   26.69   4
   8  -9   3  143.09   16.72   4
  -8  -9  -3  107.81   17.61   1
  -8  -9  -3  146.85   32.93   4
   9  -9   3  108.94   18.41   4
  -9  -9  -3  128.34   19.15   1
  -9  -9  -3  136.21   33.79   4
  10  -9   3   31.03   16.05   4
 -10  -9  -3   10.60   19.58   1
 -10  -9  -3   89.97   32.42   4
 -11  -9  -3   61.44   20.93   1
 -12  -9  -3  102.71   22.50   1
 -13  -9  -3   77.56   24.27   1
 -15 -10   3   51.61   20.61   1
 -15 -10   3   78.08   33.89   4
 -14 -10   3   49.84   31.60   4
 -13 -10   3   72.79   17.37   1
  13 -10  -3   42.86   27.82   3
 -13 -10   3   90.29   34.81   4
  12 -10  -3  138.24   26.24   3
 -12 -10   3  154.60   16.89   1
 -12 -10   3  131.07   36.02   4
 -11 -10   3  165.75   33.43   4
  11 -10  -3  154.14   24.58   3
 -11 -10   3  131.57   15.87   1
  10 -10  -3   73.00   15.88   4
  10 -10  -3  100.63   22.53   3
 -10 -10   3   68.84   13.79   1
 -10 -10   3  135.27   32.13   4
   9 -10  -3  147.05   17.41   4
   9 -10  -3  137.07   23.53   3
  -9 -10   3  149.39   30.77   4
  -9 -10   3  166.51   13.88   1
   8 -10  -3  151.72   23.43   3
  -8 -10   3  151.02   14.19   1
   8 -10  -3  146.20   16.45   4
  -8 -10   3  139.47   29.62   4
   7 -10  -3    1.83    7.17   4
  -7 -10   3   11.68   10.19   1
   7 -10  -3    9.17   23.71   3
  -7 -10   3   37.06   15.02   4
  -6 -10   3  197.16   13.64   1
   6 -10  -3  180.55   24.65   3
  -6 -10   3  181.92   22.18   4
   6 -10  -3  187.28   17.05   4
   5 -10  -3  222.80   18.69   4
   5 -10  -3  226.59   27.46   3
  -5 -10   3  272.12   22.75   4
   4 -10  -3   79.54   14.52   4
   4 -10  -3   87.98   23.94   3
  -4 -10   3  109.16   19.87   4
  -3 -10   3  143.70   21.63   4
   3 -10  -3  182.33   26.03   3
   3 -10  -3  150.14   16.18   4
   2 -10  -3   57.31   28.23   3
   2 -10  -3   73.43   14.05   4
  -2 -10   3   69.46   16.12   4
   1 -10  -3  139.15   19.59   4
  -1 -10   3  161.86   25.88   3
  -1 -10   3  142.73   18.26   4
   1 -10  -3  121.87   28.15   3
   0 -10   3  193.91   19.88   4
   0 -10   3  219.87   25.88   3
   0 -10  -3  194.65   20.99   4
   0 -10  -3  191.99   28.56   3
   1 -10   3  331.44   32.19   3
  -1 -10  -3  345.70   25.00   4
   1 -10   3  285.70   24.30   4
  -1 -10  -3  357.76   35.81   3
  -1 -10  -3  353.29   18.37   1
   2 -10   3  719.89   59.70   3
  -2 -10  -3  734.98   44.66   4
  -2 -10  -3  805.84   37.89   1
  -2 -10  -3  781.06   61.65   3
   2 -10   3  741.18   44.23   4
  -3 -10  -3  168.30   28.79   3
   3 -10   3  114.16   16.39   4
   3 -10   3  115.23   19.04   3
  -3 -10  -3  135.08   19.14   4
  -3 -10  -3  103.34   12.32   1
  -4 -10  -3   38.95   11.53   1
  -4 -10  -3   22.04   29.61   4
   4 -10   3   53.90   16.05   4
  -4 -10  -3   47.28   25.41   3
   4 -10   3   36.80   16.37   3
   5 -10   3   11.56   12.49   3
  -5 -10  -3   -5.27   12.72   4
  -5 -10  -3   16.44   11.99   1
   5 -10   3   12.39   12.65   4
  -6 -10  -3  171.61   16.20   1
   6 -10   3  175.98   19.11   4
   6 -10   3  186.77   21.59   3
  -6 -10  -3  170.03   30.85   4
  -7 -10  -3  636.70   47.22   4
   7 -10   3  710.10   39.78   4
   7 -10   3  627.40   52.06   3
  -7 -10  -3  621.85   34.88   1
   8 -10   3  642.11   38.45   4
  -8 -10  -3  609.88   45.23   4
  -8 -10  -3  584.41   33.75   1
  -9 -10  -3  102.32   30.37   4
  -9 -10  -3   53.28   16.69   1
   9 -10   3   62.14   18.43   4
 -10 -10  -3    7.32   11.25   1
 -10 -10  -3  102.15   34.70   4
  10 -10   3   37.01   18.75   4
  11 -10   3   -3.80   32.42   4
 -11 -10  -3   19.00   20.66   1
 -12 -10  -3   21.63   21.40   1
  12 -10   3   42.61   20.63   4
  13 -10   3  124.48   23.57   4
 -13 -10  -3  121.06   23.58   1
 -14 -11   3   49.98   17.73   1
 -14 -11   3   73.20   29.39   4
 -13 -11   3   96.80   17.21   1
 -13 -11   3  207.93   35.22   4
  12 -11  -3   23.18   23.24   3
 -12 -11   3   18.61   13.58   1
 -12 -11   3   64.26   36.29   4
 -11 -11   3   45.12   14.95   1
  11 -11  -3   50.37   24.91   3
 -11 -11   3   66.47   33.32   4
 -10 -11   3    3.57   23.32   1
 -10 -11   3   29.85   26.70   4
  10 -11  -3    4.93   38.39   3
   9 -11  -3    4.19   13.48   3
   9 -11  -3   -4.45  123.92   4
   8 -11  -3  244.51   20.57   4
  -8 -11   3  272.29   30.28   4
   8 -11  -3  306.54   29.25   3
  -7 -11   3   88.23   19.58   4
   7 -11  -3   28.17   16.17   4
   7 -11  -3   32.62   21.22   3
   6 -11  -3  109.46   23.83   3
   6 -11  -3   71.73   15.25   4
  -6 -11   3  125.42   20.74   4
  -5 -11   3   71.72   21.35   4
   5 -11  -3   60.86   15.49   4
   5 -11  -3   65.50   22.93   3
  -4 -11   3   49.06   20.69   4
   4 -11  -3   49.55   14.24   4
   4 -11  -3   42.94   25.27   3
  -3 -11   3   23.10   23.25   4
   3 -11  -3   61.12   14.44   4
   3 -11  -3   70.13   24.84   3
   2 -11  -3  271.03   23.39   4
  -2 -11   3  298.56   23.31   4
   2 -11  -3  317.08   34.22   3
  -1 -11   3  233.14   20.80   4
   1 -11  -3  200.04   21.51   4
  -1 -11   3  246.68   27.83   3
   1 -11  -3  241.39   30.72   3
   0 -11   3  153.07   19.01   4
   0 -11  -3  178.03   28.01   3
   0 -11  -3  173.21   19.36   4
   0 -11   3  157.97   24.09   3
   1 -11   3  455.59   40.51   3
  -1 -11  -3  522.90   43.81   3
  -1 -11  -3  486.44   30.92   4
   1 -11   3  446.59   30.31   4
   2 -11   3   27.99   16.72   3
   2 -11   3   -2.34  109.99   4
  -2 -11  -3   39.18   19.48   3
  -2 -11  -3   16.24   15.09   4
  -3 -11  -3   49.22   23.84   3
   3 -11   3   26.38   16.02   4
   3 -11   3   10.72   20.91   3
  -3 -11  -3   53.83   16.43   4
  -4 -11  -3  363.45   19.45   1
   4 -11   3  279.16   24.51   4
   4 -11   3  283.26   29.95   3
  -4 -11  -3  320.52   31.83   4
  -4 -11  -3  376.03   35.79   3
   5 -11   3   71.78   16.90   4
   5 -11   3   86.85   20.11   3
  -5 -11  -3   71.57   12.99   1
  -5 -11  -3   54.38   29.97   4
  -6 -11  -3   76.02   31.43   4
   6 -11   3   70.83   18.32   4
   6 -11   3   76.76   19.10   3
  -6 -11  -3   75.80   14.69   1
  -7 -11  -3   45.08   30.16   4
  -7 -11  -3   41.90   14.81   1
   7 -11   3   13.31   18.44   4
   7 -11   3   28.56   17.23   3
  -8 -11  -3   62.24   26.34   4
  -8 -11  -3   16.47   18.75   1
   8 -11   3   27.66   19.22   4
   9 -11   3   77.38   19.82   4
  -9 -11  -3   74.75   34.84   4
  -9 -11  -3   39.05   17.01   1
 -10 -11  -3  195.96   21.04   1
  10 -11   3  206.38   24.28   4
 -10 -11  -3  266.50   37.07   4
 -11 -11  -3  264.21   40.97   4
  11 -11   3  147.59   25.19   4
 -11 -11  -3  135.27   20.71   1
 -12 -11  -3   37.79   20.41   1
  12 -11   3   61.25   22.10   4
 -13 -12   3   41.96   29.59   4
  12 -12  -3    3.68   44.64   3
 -12 -12   3    3.12   32.57   4
 -11 -12   3   83.68   30.88   4
  11 -12  -3   62.34   25.83   3
 -10 -12   3   35.50   38.86   4
  10 -12  -3   17.91   25.17   3
   9 -12  -3  162.60   26.15   3
  -9 -12   3  164.96   33.45   4
   8 -12  -3   14.42   15.78   4
   8 -12  -3    3.36   27.50   3
  -7 -12   3   70.64   20.81   4
   7 -12  -3   45.08   23.79   3
   7 -12  -3   48.23   16.54   4
  -6 -12   3   26.85   17.84   4
   6 -12  -3   -0.56    9.86   3
   6 -12  -3    0.89    7.61   4
  -5 -12   3    6.52   34.08   4
   5 -12  -3   15.05   13.73   4
   5 -12  -3   -1.90   23.67   3
  -4 -12   3  172.64   22.95   4
   4 -12  -3  147.48   17.56   4
   4 -12  -3  142.67   26.83   3
   3 -12  -3   68.35   28.25   3
   3 -12  -3   57.18   17.69   4
  -3 -12   3   38.61   23.17   4
   2 -12  -3   30.31   21.53   3
  -2 -12   3   -3.29    8.32   4
  -1 -12   3   17.92   20.74   3
   1 -12  -3    1.84   37.52   3
   1 -12  -3    7.46   18.33   4
  -1 -12   3   15.96   13.49   4
   0 -12   3   -1.18  157.50   4
   0 -12  -3    3.58   11.11   4
   0 -12  -3   14.85   17.13   3
   0 -12   3   24.88   16.01   3
   1 -12   3   83.72   23.20   3
   1 -12   3   85.84   17.00   4
  -1 -12  -3   91.80   26.14   3
  -1 -12  -3   92.55   20.11   4
  -2 -12  -3   16.79   12.29   4
   2 -12   3   -2.73   19.13   4
  -2 -12  -3    6.81   30.23   3
   2 -12   3   13.37   19.85   3
   3 -12   3  147.11   19.69   4
  -3 -12  -3  200.10   30.40   3
  -3 -12  -3  198.03   21.53   4
   3 -12   3  171.72   23.40   3
   4 -12   3   -3.66   10.81   4
  -4 -12  -3   32.36   23.78   3
   4 -12   3    9.47   16.02   3
   5 -12   3   13.49   18.87   3
   5 -12   3   -0.87   13.65   4
   6 -12   3   11.34   17.25   4
   6 -12   3   20.59   20.40   3
  -6 -12  -3    7.20   35.21   4
  -7 -12  -3   37.00   29.80   4
   7 -12   3    9.94   15.58   4
  -8 -12  -3   68.70   32.34   4
   8 -12   3   14.05   16.79   4
  -8 -12  -3   36.54   15.99   1
  -9 -12  -3   62.40   35.27   4
  -9 -12  -3   15.76   14.93   1
  10 -12   3    3.99   43.12   4
 -10 -12  -3   52.49   31.94   4
 -11 -12  -3   15.47   21.25   1
 -11 -12  -3   69.73   33.17   4
  11 -12   3   30.83   22.99   4
 -12 -12  -3   -8.62   32.20   1
  12 -13  -3   -2.16   22.34   3
 -11 -13   3   55.22   34.31   4
  11 -13  -3   24.44   26.31   3
  10 -13  -3   15.69   20.24   3
 -10 -13   3   13.47   41.26   4
   9 -13  -3   19.35   25.11   3
  -9 -13   3    3.50  143.58   4
   8 -13  -3    7.03   19.38   3
   7 -13  -3  190.15   29.74   3
  -7 -13   3  254.90   25.79   4
   6 -13  -3   21.79   14.73   4
  -6 -13   3   15.55   17.98   4
   6 -13  -3   12.99   37.62   3
  -5 -13   3  116.65   20.27   4
   5 -13  -3  108.54   26.79   3
   5 -13  -3   85.49   17.43   4
   4 -13  -3   -3.22   12.41   3
   4 -13  -3    1.66   20.59   4
  -4 -13   3    1.49   26.32   4
  -3 -13   3  160.21   23.98   4
   3 -13  -3  165.02   21.37   4
   3 -13  -3  204.17   30.19   3
   2 -13  -3   -7.72   18.92   4
  -2 -13   3   28.52   23.27   4
   2 -13  -3   -1.96  507.86   3
  -1 -13   3  314.34   25.49   4
   1 -13  -3  320.17   36.22   3
   1 -13  -3  321.83   25.71   4
   0 -13  -3   -3.81   74.77   4
   0 -13   3   21.24   22.68   3
   0 -13  -3   11.72   33.16   3
   0 -13   3    4.77   12.91   4
   1 -13   3  113.30   22.69   3
  -1 -13  -3  168.61   29.69   3
  -1 -13  -3  128.04   20.53   4
   1 -13   3  125.72   19.52   4
   2 -13   3   53.12   18.65   4
   2 -13   3   80.46   20.83   3
  -2 -13  -3  116.17   26.94   3
  -2 -13  -3   96.93   18.46   4
  -3 -13  -3   61.34   27.62   3
   3 -13   3   30.67   21.62   3
  -3 -13  -3   33.49   18.95   4
   3 -13   3   14.27   17.75   4
  -4 -13  -3   43.61   28.15   3
   4 -13   3   -7.44   21.85   4
   4 -13   3   14.28   16.49   3
  -5 -13  -3  222.11   33.85   4
   5 -13   3  240.72   28.11   3
   5 -13   3  228.83   23.38   4
   6 -13   3   37.81   21.39   3
  -6 -13  -3   59.65   32.60   4
   6 -13   3   46.67   19.72   4
   7 -13   3   35.41   19.48   4
  -7 -13  -3   67.06   29.33   4
   8 -13   3   15.13   22.00   4
  -8 -13  -3   35.60   38.07   4
  -9 -13  -3   95.21   34.46   4
   9 -13   3   52.33   22.14   4
 -10 -13  -3   53.94   32.24   4
  11 -14  -3   49.71   29.29   3
  10 -14  -3   -6.96   15.67   3
   9 -14  -3   29.52   30.36   3
  -9 -14   3   55.97   35.12   4
   8 -14  -3   -6.64   20.56   3
  -7 -14   3   28.96   22.80   4
   7 -14  -3    8.11   38.68   3
  -6 -14   3    9.93   17.51   4
   6 -14  -3    4.28   29.41   3
  -5 -14   3  201.92   26.36   4
   5 -14  -3  186.84   31.46   3
   5 -14  -3  197.58   21.27   4
   4 -14  -3   23.63   24.45   3
   3 -14  -3  202.57   30.41   3
   3 -14  -3  171.05   23.25   4
  -3 -14   3  162.90   25.97   4
   2 -14  -3   62.25   26.86   3
   2 -14  -3   19.26   26.46   4
  -2 -14   3   48.43   23.48   4
  -1 -14   3    7.34   26.46   4
   1 -14  -3    4.30   50.75   4
   1 -14  -3    8.50   24.41   3
   0 -14  -3    8.15   19.10   3
   0 -14  -3   18.70   18.73   4
   0 -14   3    6.92   11.00   4
   0 -14   3   21.50   22.22   3
   1 -14   3  120.95   25.17   3
   1 -14   3  101.51   20.27   4
  -1 -14  -3  129.80   31.60   3
  -1 -14  -3  120.03   21.15   4
   2 -14   3    4.81   11.08   4
  -2 -14  -3    9.46   22.20   3
   2 -14   3   14.63   23.34   3
  -2 -14  -3   33.19   19.09   4
   3 -14   3   24.49   23.71   3
  -3 -14  -3    7.11 1645.21   4
  -3 -14  -3   64.93   30.73   3
   3 -14   3   10.63   20.97   4
  -4 -14  -3   -3.05    9.39   4
   4 -14   3    9.25   22.60   4
   4 -14   3   10.74   24.08   3
   5 -14   3   -4.40   18.92   4
   5 -14   3   27.28   21.47   3
  -5 -14  -3   15.68   47.99   4
  -6 -14  -3   15.59   35.65   4
   6 -14   3   14.68   17.49   4
   6 -14   3   -1.10    4.40   3
   7 -14   3  152.43   23.43   4
  -7 -14  -3  192.75   35.63   4
   8 -14   3    6.81   36.85   4
  -8 -14  -3   26.94   24.59   4
   9 -14   3   67.13   24.61   4
   9 -15  -3    5.01   41.52   3
   7 -15  -3  169.69   31.62   3
  -7 -15   3  273.24   28.45   4
   6 -15  -3   -1.34   14.82   3
  -5 -15   3   34.84   25.35   4
   5 -15  -3   39.85   26.38   3
   4 -15  -3   -5.18   31.32   3
  -4 -15   3    5.47   15.45   4
   3 -15  -3   28.52   33.91   3
  -3 -15   3   20.53   18.40   4
   2 -15  -3    4.00  373.74   4
   2 -15  -3   22.16   24.39   3
   1 -15  -3   45.90   35.22   3
  -1 -15   3   20.86   34.79   4
   1 -15  -3   37.95   23.43   4
   0 -15   3    2.78   10.32   4
   0 -15  -3   19.49   26.81   3
   0 -15  -3   -4.16   10.06   4
   1 -15   3   -6.60   64.40   3
  -1 -15  -3   21.05   16.80   4
   1 -15   3   10.67   14.97   4
  -1 -15  -3   26.16   25.95   3
   2 -15   3   23.46   25.26   3
   2 -15   3   -7.43  518.87   4
  -2 -15  -3   46.95   20.92   4
  -2 -15  -3   20.76   24.63   3
   3 -15   3   54.50   22.48   3
  -3 -15  -3   67.83   32.93   3
   3 -15   3   52.72   22.40   4
   4 -15   3    2.11  158.44   4
   4 -15   3   10.43   17.38   3
  -5 -15  -3   39.52   32.25   4
   5 -15   3   97.05   22.74   4
   5 -15   3   90.61   24.56   3
   6 -15   3   -1.98    8.46   4
  -6 -15  -3   27.31   32.16   4
   7 -15   3   24.57   26.28   4
  -7 -15  -3   65.40   33.09   4
   6 -16  -3    4.64   15.25   3
  -5 -16   3   41.33   26.52   4
   5 -16  -3   21.94   29.21   3
   4 -16  -3   33.96   24.77   3
  -4 -16   3   66.20   26.07   4
   3 -16  -3   43.68   30.94   3
  -3 -16   3   83.99   25.85   4
  -2 -16   3    9.76   28.22   4
   2 -16  -3   16.53   26.84   3
  -1 -16   3   -3.98   11.21   4
   1 -16  -3    7.66   25.51   3
   1 -16  -3   22.11   22.43   4
   0 -16  -3   31.29   23.89   3
   1 -16   3   51.53   22.44   4
  -1 -16  -3   27.71   20.42   4
  -1 -16  -3   31.04   29.83   3
   2 -16   3   33.00   26.64   3
  -2 -16  -3   35.06   19.87   4
  -2 -16  -3   52.83   34.49   3
   2 -16   3   33.75   20.30   4
   3 -16   3   29.28   22.11   4
   3 -16   3   35.48   27.75   3
   4 -16   3    8.24   12.53   3
   4 -16   3    5.17   17.14   4
   5 -16   3   22.34   30.19   3
  -1 -17  -3   31.05   21.35   4
 -18   0   4   13.66   16.72   1
 -17   0   4   -7.77   19.97   1
 -16   0   4  244.35   21.36   1
 -15   0   4   -2.04   71.01   1
  15   0  -4   86.61   32.01   3
  14   0  -4  340.62   42.42   3
 -14   0   4  357.72   23.37   1
  13   0  -4  126.20   28.82   3
 -13   0   4    2.38   15.76   1
 -12   0   4  498.40   27.64   1
 -11   0   4   10.84   14.79   1
 -10   0   4  451.42   26.20   1
  -9   0   4    1.94    7.48   1
  -8   0   4 1564.60   75.78   1
  -7   0   4    2.07    8.05   1
  -6   0   4  830.55   40.78   1
   5   0  -4   -5.86    3.97   2
  -5   0   4   13.56    6.55   4
   4   0  -4 2041.20  111.33   2
  -4   0   4 1968.37  109.46   4
   3   0  -4   -1.37    1.25   2
  -3   0   4   -0.44    0.69   4
  -2   0   4 3264.74  194.61   4
   2   0  -4 3716.22  194.40   2
   1   0  -4  -10.55   14.36   2
   0   0  -4 5170.96  430.74   3
   0   0  -4 6316.34  328.99   2
   0   0  -4 5769.13  280.27   1
  -1   0  -4   24.20   10.85   2
  -1   0  -4    7.37    3.37   3
  -1   0  -4   -3.71    4.12   1
  -2   0  -4 8474.75  423.42   1
  -2   0  -4 8866.62  495.22   2
  -3   0  -4    6.66   13.75   2
  -3   0  -4    8.26    5.64   1
  -4   0  -4  934.86   52.95   2
  -4   0  -4  895.13   44.57   1
  -5   0  -4   10.04    7.56   1
   5   0   4   15.36    4.86   3
  -5   0  -4   10.82   11.15   2
  -6   0  -4  183.66   22.05   2
  -6   0  -4  147.82   13.30   1
   6   0   4  159.03   15.44   3
  -7   0  -4   30.23   21.09   2
   7   0   4   25.87   12.51   3
  -8   0  -4 1798.97  100.95   2
  -8   0  -4 1748.03   85.93   1
  -9   0  -4    4.34    4.12   1
 -10   0  -4  186.64   26.31   2
 -10   0  -4  139.27   14.26   1
 -11   0  -4   32.66   19.58   2
 -11   0  -4   10.13   11.91   1
 -12   0  -4  158.15   25.96   2
 -12   0  -4   87.61   14.67   1
 -13   0  -4   -5.49   14.11   1
 -14   0  -4  259.62   19.87   1
 -15   0  -4   -6.12   10.35   1
 -16   0  -4  149.28   20.27   1
 -19   1   4    9.29   16.39   1
 -18   1   4  116.16   20.71   1
 -18  -1   4  125.31   22.78   1
 -17  -1   4   37.31   20.06   1
 -17   1   4   33.58   18.60   1
 -16   1   4   76.87   17.63   1
 -16  -1   4  105.49   18.79   1
  16   1  -4  160.84   35.34   3
  15   1  -4  219.03   32.64   3
 -15   1   4   86.16   18.10   1
  15  -1  -4  106.58   38.98   3
 -15  -1   4   83.99   19.07   1
 -14  -1   4   53.06   15.15   1
 -14   1   4   68.69   15.11   1
  14  -1  -4   86.09   37.42   3
 -13  -1   4   25.23   14.36   1
 -13   1   4    8.72   14.33   1
  13  -1  -4   96.93   35.41   3
  12  -1  -4  515.09   50.90   3
 -12   1   4  519.26   28.09   1
 -12  -1   4  501.57   28.46   1
 -11   1   4   64.78   15.75   1
  11  -1  -4  212.51   32.56   3
 -11  -1   4   69.94   17.13   1
 -10   1   4   41.32   16.85   1
  10  -1  -4  169.11   29.21   3
 -10  -1   4   44.13   15.51   1
  -9   1   4   12.17   11.72   1
   9  -1  -4  171.57   24.43   3
  -9  -1   4   23.44   13.57   1
   8  -1  -4  521.26   44.17   3
  -8  -1   4  461.52   31.85   4
  -8  -1   4  513.14   26.14   1
  -8   1   4  492.49   25.79   1
  -7  -1   4   32.68   12.15   4
  -7  -1   4   12.84   12.29   1
  -7   1   4   44.29    9.15   1
   6  -1  -4 1809.33  152.64   3
  -6  -1   4 2182.24   97.38   1
  -6  -1   4 2091.23  111.49   4
   5  -1  -4  496.41   39.03   3
  -5  -1   4  485.35   27.35   4
   5   1  -4  426.89   25.89   2
   4  -1  -4  221.97   19.92   3
   4   1  -4  186.69   12.78   2
  -4  -1   4  202.07   13.64   4
   4  -1  -4  194.67   14.16   2
   3  -1  -4  422.86   22.12   2
  -3  -1   4  362.33   21.21   4
   3  -1  -4  372.51   30.50   3
   3   1  -4  321.27   22.35   2
  -2  -1   4  210.35   14.66   4
   2  -1  -4  284.63   18.14   2
   2   1  -4  221.04   17.52   2
   2  -1  -4  248.30   21.10   3
   1  -1  -4   42.60   27.85   3
   1   1  -4   79.03   14.90   2
   1  -1  -4   83.07   11.01   2
   0  -1  -4 1243.33   97.87   3
   0   1  -4 1401.62   73.62   2
   0  -1  -4 1190.21   62.67   1
   0  -1  -4 1402.25   73.70   2
  -1   1  -4  276.34   14.22   1
  -1  -1  -4  275.33   15.18   1
  -1  -1  -4  257.36   21.49   3
  -1   1  -4  274.81   18.96   2
  -1  -1  -4  284.01   20.30   2
  -2  -1  -4 1004.11   50.26   1
  -2   1  -4 1053.44   58.75   2
  -2   1  -4  972.18   49.91   1
  -2  -1  -4 1069.89   77.57   3
  -2  -1  -4 1087.27   58.83   2
  -3  -1  -4  130.65   14.86   2
  -3   1  -4  123.90    9.39   1
  -3  -1  -4  133.31   11.10   1
  -3   1  -4  117.95   14.85   2
  -4  -1  -4 1342.32   78.63   2
  -4   1  -4 1435.29   78.54   2
  -4   1  -4 1460.95   66.97   1
  -4  -1  -4 1327.87   67.25   1
  -5   1  -4  474.63   24.91   1
  -5  -1  -4  498.12   31.72   2
  -5  -1  -4  506.86   25.41   1
  -5   1  -4  504.71   30.88   2
  -6  -1  -4 1558.07   87.32   2
   6  -1   4 1358.80  114.64   3
  -6   1  -4 1661.93   87.25   2
  -6   1  -4 1548.28   74.32   1
  -6  -1  -4 1611.43   74.82   1
  -7   1  -4  110.78   20.87   2
  -7  -1  -4  137.54   21.46   2
   7  -1   4   88.30   11.15   3
  -7  -1  -4  104.62   14.33   1
  -7   1  -4   94.79   11.74   1
  -8  -1  -4   44.09   21.58   2
  -8   1  -4   30.85   19.16   2
  -8  -1  -4   12.20   10.81   1
  -9  -1  -4  111.15   14.92   1
  -9   1  -4  133.13   25.98   2
  -9  -1  -4  126.23   23.33   2
  -9   1  -4   95.12   12.40   1
 -10   1  -4  189.23   13.99   1
 -10  -1  -4  223.18   26.50   2
 -10  -1  -4  137.60   15.53   1
 -10   1  -4  219.33   25.51   2
 -11   1  -4    5.71   14.53   1
 -11  -1  -4    6.68    8.96   1
 -11   1  -4   41.80   23.41   2
 -11  -1  -4   39.94   27.19   2
 -12  -1  -4  384.68   24.12   1
 -12   1  -4  422.31   23.66   1
 -12   1  -4  426.99   35.44   2
 -13  -1  -4  171.94   18.02   1
 -13   1  -4  200.48   16.81   1
 -14  -1  -4   14.58   14.92   1
 -14   1  -4   21.48   14.66   1
 -15  -1  -4    1.59    6.94   1
 -15   1  -4   14.06   18.80   1
 -16  -1  -4  106.11   18.81   1
 -16   1  -4  110.45   19.33   1
 -19   2   4   14.26   17.17   1
 -18   2   4    1.24   14.49   1
 -18  -2   4   -4.82   24.84   1
 -17  -2   4    3.09   26.28   1
 -17   2   4    4.14   44.60   1
 -16   2   4   96.98   17.71   1
 -16  -2   4   97.40   19.80   1
  15  -2  -4   40.87   47.99   3
 -15  -2   4   61.60   18.88   1
 -15   2   4   67.69   15.97   1
  14  -2  -4  106.10   46.88   3
 -14  -2   4  119.35   17.18   1
 -14   2   4  134.20   16.77   1
 -13  -2   4   21.45   12.12   1
  13  -2  -4   18.76   58.76   3
 -13   2   4    3.13   28.87   1
 -12   2   4   43.79   13.18   1
 -12  -2   4   73.48   14.14   1
  12  -2  -4   51.26   39.60   3
 -11   2   4   16.31   17.25   1
  11  -2  -4   46.08   32.57   3
 -11  -2   4   12.18   13.95   1
 -10  -2   4  800.64   41.67   1
 -10   2   4  840.63   41.34   1
  10  -2  -4  806.34   69.35   3
  -9  -2   4  132.64   21.12   4
  -9   2   4  100.39   13.45   1
   9  -2  -4  137.42   28.12   3
  -9  -2   4   85.17   15.85   1
   8  -2  -4  208.60   27.33   3
  -8   2   4  143.03   13.04   1
  -8  -2   4  142.79   18.60   4
  -8  -2   4  140.94   13.63   1
  -7  -2   4    9.80    7.86   1
  -7   2   4    2.16    3.74   1
  -7  -2   4    4.15    6.82   4
   7  -2  -4   18.42   19.09   3
   6  -2  -4  631.25   54.04   3
  -6  -2   4  690.10   33.56   1
  -6  -2   4  688.36   39.46   4
  -5  -2   4   31.36    9.25   4
   5  -2  -4   11.43   23.10   3
  -5  -2   4   27.14    8.33   1
  -4  -2   4 2536.36  128.13   4
   4   2  -4 2158.99  129.63   2
   4  -2  -4 2325.48  175.40   3
   3   2  -4  155.24   12.98   2
   3  -2  -4  104.23   26.60   3
   3  -2  -4  194.70   13.31   2
  -3  -2   4  180.02   11.47   4
  -2  -2   4   44.54    8.07   4
   2   2  -4   38.84   11.91   2
   2  -2  -4   74.27   12.53   3
   2  -2  -4   58.12    9.46   2
   1  -2  -4   45.80    7.26   4
   1  -2  -4   37.55   15.07   3
   1  -2  -4   36.19   14.49   2
   1   2  -4   17.41   17.21   2
  -1  -2   4   32.17    8.02   4
   0  -2  -4    6.16    5.77   2
   0  -2  -4    1.95   47.40   1
  -1  -2  -4   76.43   11.60   2
  -1  -2  -4   71.51    8.93   1
  -1   2  -4   45.54   13.77   2
  -1  -2  -4   55.60   12.06   3
  -1   2  -4   68.02    6.50   1
  -2   2  -4 2082.02   94.20   1
  -2  -2  -4 1877.21   94.66   1
  -2  -2  -4 2012.68  147.70   3
  -2   2  -4 1928.55  110.39   2
  -2  -2  -4 1973.50  110.60   2
  -3   2  -4 1215.94   66.43   2
  -3  -2  -4 1118.40   88.02   3
  -3  -2  -4 1091.61   56.91   1
  -3  -2  -4 1287.78   66.88   2
   3  -2   4 1069.72   87.40   3
  -3   2  -4 1282.20   56.44   1
  -4  -2  -4  519.34   27.04   1
  -4   2  -4  512.20   25.91   1
  -4   2  -4  554.63   32.79   2
  -4  -2  -4  520.13   33.22   2
  -5   2  -4   90.29   19.37   2
  -5   2  -4   95.66    8.45   1
  -5  -2  -4   99.58   18.98   2
  -5  -2  -4   91.22   11.50   1
   5  -2   4   64.26    6.79   3
  -6   2  -4   -3.50   12.25   1
   6  -2   4    2.20    4.01   3
  -6  -2  -4    4.71   14.11   1
  -6  -2  -4   15.84   18.58   2
   7  -2   4   13.16    7.25   3
  -7   2  -4    8.97   30.09   2
  -7  -2  -4   20.05   18.75   2
  -7  -2  -4   15.11   13.01   1
  -7   2  -4   14.60    8.71   1
  -8   2  -4   50.39   11.11   1
  -8   2  -4   43.29   26.27   2
  -8  -2  -4   34.80   24.90   2
  -8  -2  -4   49.06   15.40   1
  -9   2  -4   26.23   22.20   2
  -9  -2  -4   33.08   14.94   1
  -9   2  -4   27.12   10.06   1
  -9  -2  -4   34.72   26.98   2
 -10  -2  -4   10.79   20.87   2
 -10   2  -4   22.72   19.94   2
 -10  -2  -4   12.03   21.09   1
 -10   2  -4   19.00   11.63   1
 -11   2  -4    7.61   18.76   1
 -11   2  -4   17.69   20.11   2
 -11  -2  -4   -4.63   33.44   1
 -12   2  -4  191.86   28.77   2
 -12  -2  -4  149.26   17.44   1
 -12   2  -4  179.12   16.14   1
 -13   2  -4  165.49   31.27   2
 -13  -2  -4  142.62   18.02   1
 -13   2  -4  151.74   16.30   1
 -14  -2  -4  129.86   19.89   1
 -14   2  -4  140.47   17.27   1
 -15  -2  -4   52.22   19.82   1
 -15   2  -4   71.73   18.40   1
 -16  -2  -4   20.55   12.27   1
 -16   2  -4   24.60   20.17   1
 -19   3   4   79.47   22.51   1
 -18   3   4   45.27   20.17   1
 -18  -3   4   56.87   22.82   1
 -17  -3   4  152.60   21.68   1
 -17   3   4   91.21   19.60   1
 -16  -3   4   35.34   17.83   1
 -16   3   4   35.74   17.36   1
 -15   3   4    3.48   10.79   1
 -15  -3   4   12.83   14.78   1
  14  -3  -4   55.54   69.26   3
 -14   3   4  119.70   16.15   1
 -14  -3   4  114.83   18.72   1
 -13  -3   4   -7.80   22.66   1
 -13   3   4   -4.46   11.15   1
 -12   3   4  167.13   14.99   1
 -12  -3   4  166.71   16.99   1
  12  -3  -4  123.33   52.27   3
 -11   3   4   43.44   14.51   1
 -11  -3   4   39.37   15.98   1
  10  -3  -4   45.51   74.90   3
 -10  -3   4  181.01   25.40   4
 -10   3   4  132.86   14.62   1
 -10  -3   4  124.77   17.19   1
  -9   3   4  811.19   41.29   1
   9  -3  -4  825.02   70.61   3
  -9  -3   4  834.05   42.15   1
  -9  -3   4  847.22   50.82   4
  -8   3   4   22.41    9.89   1
  -8  -3   4   29.63   16.07   4
  -8  -3   4   20.00   10.67   1
   7  -3  -4  399.73   41.90   3
  -7   3   4  413.69   21.65   1
  -7  -3   4  403.75   29.89   4
  -7  -3   4  419.90   22.32   1
   6  -3  -4  796.87   68.02   3
  -6  -3   4  848.05   48.04   4
  -6  -3   4  860.58   41.37   1
   5  -3  -4 2123.16  161.53   3
  -5  -3   4 2138.35  117.94   4
  -5  -3   4 2178.37  102.72   1
   4  -3  -4  222.01   22.44   3
  -4  -3   4  234.55   13.04   1
   4   3  -4  199.92   14.46   2
   4  -3  -4  222.81   13.27   4
   4  -3  -4  264.71   16.52   2
  -4  -3   4  229.30   16.65   4
   3  -3  -4   10.34   13.33   2
  -3  -3   4   20.97   10.33   4
   3  -3  -4   21.14    4.75   4
   3   3  -4    3.78    7.49   2
   3  -3  -4   23.72   14.19   3
   2  -3  -4 2450.42  125.44   2
   2  -3  -4 2500.62  122.60   4
   2  -3  -4 2081.41  168.43   3
  -2  -3   4 1959.34  123.01   4
  -1  -3   4  305.02   18.94   4
   1  -3  -4  277.07   28.05   3
   1  -3  -4  351.37   20.15   2
   1  -3  -4  304.61   18.89   4
   0  -3  -4 1183.51   61.32   2
   0  -3  -4 1057.63   59.80   4
   0  -3  -4 1052.38   52.21   1
   0  -3  -4 1017.72   81.67   3
   0  -3   4 1099.31   59.81   4
  -1  -3  -4  591.76   28.93   1
  -1  -3  -4  598.58   34.63   2
  -1  -3  -4  570.51   44.76   3
  -1  -3  -4  554.21   33.66   4
  -2  -3  -4  521.86   41.13   3
  -2  -3  -4  515.85   26.64   1
  -2   3  -4  547.82   25.63   1
  -2  -3  -4  484.66   32.39   2
   2  -3   4  546.13   39.99   3
  -2  -3  -4  506.97   31.92   4
  -3   3  -4  536.12   25.26   1
  -3  -3  -4  472.99   31.84   2
  -3  -3  -4  509.81   26.49   1
   3  -3   4  551.55   39.20   3
  -3  -3  -4  482.13   40.07   3
   4  -3   4 1453.69  103.26   3
  -4  -3  -4 1290.78   67.08   1
  -4   3  -4 1422.49   66.23   1
  -4  -3  -4 1347.71   78.19   2
  -5  -3  -4  886.89   42.71   1
   5  -3   4  811.82   63.91   3
  -5   3  -4  909.73   41.45   1
  -5  -3  -4  801.93   50.45   2
  -6  -3  -4  119.28   15.14   1
   6  -3   4   99.48   10.97   3
  -6   3  -4  122.06    9.65   1
  -6  -3  -4   94.66   28.11   2
  -7  -3  -4  588.35   43.13   2
  -7   3  -4  603.14   41.19   2
  -7  -3  -4  619.74   33.53   1
  -7   3  -4  631.14   30.97   1
  -8   3  -4   79.50   25.44   2
  -8  -3  -4   72.74   16.90   1
  -8  -3  -4   42.98   33.96   2
  -8   3  -4   79.94   11.33   1
  -9  -3  -4  112.29   16.18   1
  -9   3  -4   99.87   25.81   2
  -9   3  -4  117.72   11.63   1
  -9  -3  -4   77.10   29.25   2
 -10   3  -4  386.04   32.73   2
 -10   3  -4  393.85   21.37   1
 -10  -3  -4  364.72   33.22   2
 -10  -3  -4  359.36   23.71   1
 -11   3  -4   49.28   26.04   2
 -11   3  -4   41.87   13.59   1
 -11  -3  -4   29.05   17.20   1
 -12   3  -4  327.06   20.12   1
 -12   3  -4  323.98   31.08   2
 -12  -3  -4  269.57   22.69   1
 -13   3  -4   69.47   15.79   1
 -13   3  -4   82.38   30.86   2
 -13  -3  -4   66.12   17.56   1
 -14  -3  -4    7.81   51.70   1
 -14   3  -4   16.25   17.32   1
 -15  -3  -4    4.23   22.92   1
 -15   3  -4    0.18    1.15   1
 -18  -4   4   13.30   16.99   1
 -18   4   4    8.40   19.55   1
 -17  -4   4   12.13   15.35   1
 -17   4   4   16.30   22.56   1
 -16  -4   4  115.49   21.32   1
 -16   4   4  160.59   19.11   1
 -15   4   4  101.46   16.83   1
 -15  -4   4   85.31   20.63   1
  15  -4  -4  171.39   32.46   3
  14  -4  -4  183.24   30.68   3
 -14   4   4  161.83   16.67   1
 -14  -4   4  146.67   18.78   1
 -13  -4   4   21.07   19.37   1
 -13   4   4   28.24   14.06   1
  13  -4  -4   91.59   26.27   3
  12  -4  -4   50.54   22.43   3
 -12  -4   4   38.53   23.45   4
 -12   4   4   12.38   13.42   1
 -12  -4   4    7.90   17.59   1
 -11   4   4   91.11   13.62   1
 -11  -4   4  133.42   25.97   4
 -11  -4   4   93.91   15.21   1
  11  -4  -4  146.54   28.10   3
 -10   4   4  338.76   21.03   1
  10  -4  -4  370.02   37.38   3
 -10  -4   4  313.21   33.08   4
 -10  -4   4  328.90   22.50   1
   9  -4  -4  232.97   28.51   3
  -9  -4   4  210.91   27.41   4
  -9  -4   4  214.95   18.43   1
  -9   4   4  180.46   15.59   1
  -8   4   4  644.69   32.46   1
   8  -4  -4  661.75   52.24   3
  -8  -4   4  640.74   33.23   1
  -8  -4   4  610.82   43.28   4
  -7  -4   4  807.37   39.34   1
  -7  -4   4  754.92   47.49   4
  -7   4   4  794.46   38.70   1
   7  -4  -4  778.14   61.23   3
   6  -4  -4 1807.18  139.40   3
  -6  -4   4 1906.98   89.05   1
  -6  -4   4 1840.66  102.38   4
   5  -4  -4  584.77   32.21   4
   5  -4  -4  543.81   45.48   3
  -5  -4   4  629.60   28.86   1
  -5  -4   4  657.21   34.60   4
   5   4  -4  506.60   32.36   2
   4  -4  -4  690.84   53.89   3
  -4  -4   4  662.25   38.95   4
  -4  -4   4  683.23   33.27   1
   4  -4  -4  675.73   37.61   4
  -3  -4   4  640.56   37.85   4
   3  -4  -4  684.94   37.13   4
   3  -4  -4  633.16   53.16   3
   3  -4  -4  738.71   39.02   2
  -3  -4   4  654.74   32.63   1
   2  -4  -4 2325.51  190.85   3
   2  -4  -4 2628.13  142.10   2
  -2  -4   4 2488.19  139.54   4
   2  -4  -4 2743.58  139.08   4
   1  -4  -4  840.50   46.05   4
   1  -4  -4  826.82   63.86   3
  -1  -4   4  858.36   46.55   4
   1  -4  -4  795.54   47.36   2
   0  -4  -4   74.24    8.88   1
   0  -4  -4   69.71   11.92   2
   0  -4  -4   57.91   15.24   4
   0  -4   4   61.42   10.76   4
   0  -4  -4   76.18   16.22   3
  -1  -4  -4  756.60   44.40   4
   1  -4   4  817.92   43.51   4
  -1  -4  -4  769.73   38.12   1
  -1  -4  -4  720.53   45.00   2
   1  -4   4  823.75   58.90   3
  -1  -4  -4  740.21   59.69   3
   2  -4   4  342.81   26.41   3
  -2  -4  -4  311.87   24.35   4
  -2  -4  -4  300.22   24.90   2
  -2  -4  -4  310.54   18.86   1
  -2   4  -4  329.00   16.17   1
  -2  -4  -4  327.52   28.70   3
   3  -4   4  828.82   59.52   3
  -3   4  -4  795.58   37.84   1
  -3  -4  -4  786.68   39.12   1
  -3  -4  -4  792.44   46.34   2
  -3  -4  -4  763.93   60.54   3
  -3  -4  -4  725.74   46.23   4
  -4  -4  -4  697.34   34.55   1
   4  -4   4  706.74   51.66   3
  -4  -4  -4  647.66   41.81   4
  -4  -4  -4  667.35   52.72   3
  -4   4  -4  677.29   33.01   1
  -4  -4  -4  669.44   41.23   2
  -5  -4  -4   83.92   14.89   1
  -5  -4  -4  122.37   20.63   2
  -5   4  -4   97.24    7.66   1
   5  -4   4   76.90   11.75   3
  -6  -4  -4  403.76   23.92   1
  -6  -4  -4  419.66   30.61   2
   6  -4   4  384.37   30.54   3
  -6   4  -4  388.49   20.10   1
  -7  -4  -4   91.82   18.28   1
  -7   4  -4   71.24    8.73   1
  -7  -4  -4   87.89   23.86   2
   7  -4   4   59.31   11.59   3
  -8  -4  -4  513.46   33.85   2
  -8   4  -4  467.07   24.88   1
  -8  -4  -4  471.92   28.78   1
  -9   4  -4   12.53    9.57   1
  -9  -4  -4   48.21   16.92   2
  -9  -4  -4    3.88   72.24   1
 -10   4  -4  376.70   35.91   2
 -10   4  -4  415.11   22.26   1
 -10  -4  -4  385.77   25.58   1
 -11   4  -4    4.25   22.56   1
 -11   4  -4   -3.01   10.31   2
 -11  -4  -4   12.27   19.12   1
 -12   4  -4    9.64   13.31   1
 -12   4  -4   39.32   31.10   2
 -12  -4  -4    7.74    8.97   1
 -13   4  -4  352.76   23.12   1
 -13   4  -4  333.92   35.71   2
 -13  -4  -4  310.27   25.85   1
 -14  -4  -4   47.16   19.81   1
 -14   4  -4   48.60   32.39   2
 -15  -4  -4  101.07   22.14   1
 -17  -5   4   69.25   23.22   1
 -16  -5   4    1.71    5.19   1
 -16   5   4   -9.06   16.30   1
 -15  -5   4   44.93   18.21   1
 -15   5   4   50.39   16.77   1
  15  -5  -4   60.67   34.31   3
 -14   5   4   62.91   15.89   1
  14  -5  -4   78.56   27.76   3
 -14  -5   4   48.35   16.58   1
  13  -5  -4  408.79   41.82   3
 -13  -5   4  436.49   26.25   1
 -13   5   4  435.72   24.68   1
 -12  -5   4  335.13   22.39   1
 -12   5   4  318.74   20.22   1
  12  -5  -4  304.77   35.94   3
 -12  -5   4  380.65   35.03   4
  11  -5  -4  223.34   29.94   3
 -11  -5   4  226.73   18.30   1
 -11  -5   4  209.64   28.78   4
 -11   5   4  228.17   16.30   1
 -10  -5   4  117.47   28.45   4
 -10   5   4  101.84   13.36   1
  10  -5  -4  117.22   26.92   3
 -10  -5   4   75.23   16.55   1
   9  -5  -4  554.38   51.77   3
  -9   5   4  640.23   31.27   1
  -9  -5   4  676.51   45.16   4
  -9  -5   4  594.20   32.42   1
  -8   5   4  461.70   23.29   1
   8  -5  -4  400.86   40.19   3
  -8  -5   4  425.74   36.73   4
  -8  -5   4  451.83   24.86   1
  -7  -5   4  567.66   29.42   1
   7  -5  -4  574.54   48.04   3
  -7  -5   4  572.23   35.20   4
   6  -5  -4   79.40    9.55   4
   6  -5  -4   68.00   22.15   3
  -6  -5   4   78.16   10.57   1
  -6  -5   4   96.51   15.81   4
   5  -5  -4   10.62    8.27   4
  -5  -5   4    4.08    9.51   1
  -5  -5   4   -6.47    7.04   4
   4  -5  -4  309.88   33.19   3
  -4  -5   4  352.37   17.98   1
   4  -5  -4  362.70   20.42   4
  -4  -5   4  344.36   23.60   4
   3  -5  -4   59.65   26.32   3
  -3  -5   4   78.06    7.35   1
  -3  -5   4   75.49   11.92   4
   3  -5  -4   77.98    8.82   4
  -2  -5   4  177.33   15.84   4
   2  -5  -4  177.78   16.60   2
   2  -5  -4  201.96   14.14   4
   2  -5  -4  197.71   21.47   3
  -2  -5   4  185.62   10.54   1
   1  -5  -4  726.42   57.13   3
   1  -5  -4  733.03   42.51   2
   1  -5  -4  724.18   41.07   4
  -1  -5   4  744.44   41.54   4
   0  -5   4 1143.34   86.90   3
   0  -5   4 1194.04   63.76   4
   0  -5  -4 1167.06   55.44   1
   0  -5  -4 1141.76   65.07   2
   0  -5  -4 1062.90   63.48   4
   0  -5  -4 1166.88   87.41   3
  -1  -5  -4   87.21   17.94   4
   1  -5   4   96.52   12.39   4
  -1  -5  -4  116.93   10.42   1
  -1  -5  -4  104.73   20.18   3
   1  -5   4  131.33   15.95   3
  -1  -5  -4  104.54   14.67   2
   2  -5   4   59.44   11.24   4
   2  -5   4   46.97   12.03   3
  -2  -5  -4   54.25   12.26   2
  -2  -5  -4   51.74   21.36   4
  -2  -5  -4   38.14   19.92   3
  -2  -5  -4   47.14   10.98   1
  -3  -5  -4  376.01   28.20   2
  -3  -5  -4  401.58   29.90   4
  -3   5  -4  411.67   19.77   1
   3  -5   4  413.99   32.00   3
  -3  -5  -4  371.13   22.18   1
  -3  -5  -4  411.90   34.23   3
  -4  -5  -4  202.45   22.84   3
   4  -5   4  187.54   18.53   3
  -4  -5  -4  194.57   24.85   2
  -4   5  -4  197.94   10.61   1
  -4  -5  -4  207.25   24.75   4
  -4  -5  -4  197.80   16.03   1
  -5  -5  -4 1353.35   73.08   2
   5  -5   4 1240.91   94.67   3
  -5  -5  -4 1238.17   62.10   1
  -5  -5  -4 1198.17   72.66   4
  -5   5  -4 1264.13   60.36   1
  -6  -5  -4   76.98   22.75   4
  -6   5  -4   10.06    7.47   1
  -6  -5  -4    2.70   26.01   2
  -6  -5  -4   -1.73   30.01   1
   6  -5   4    4.63    9.78   3
   7  -5   4   26.05   11.04   3
  -7  -5  -4   31.84   24.82   2
  -7   5  -4   32.97    8.51   1
  -7  -5  -4   29.82   21.19   1
  -8  -5  -4   22.27   20.89   1
  -8   5  -4   23.19    9.05   1
  -8  -5  -4    7.81   23.69   2
  -9  -5  -4    0.96    4.25   2
  -9   5  -4    4.03    5.42   1
  -9  -5  -4   23.22   18.09   1
 -10   5  -4  190.30   15.04   1
 -10  -5  -4  195.78   21.85   1
 -11  -5  -4  331.93   24.65   1
 -11   5  -4  323.02   36.56   2
 -12  -5  -4  154.43   21.83   1
 -12   5  -4  191.46   31.11   2
 -13  -5  -4   12.62   18.37   1
 -13   5  -4   -3.82  133.41   2
 -14  -5  -4   19.84   29.17   1
 -15  -5  -4   36.43   24.32   1
 -17  -6   4   53.67   22.20   1
 -16  -6   4    4.36   14.78   1
 -15  -6   4  135.37   20.37   1
 -14   6   4   11.27   13.26   1
 -14  -6   4    1.52  168.04   1
  14  -6  -4   10.42   25.60   3
 -13  -6   4  103.79   31.56   4
  13  -6  -4   71.25   30.93   3
 -13   6   4   48.69   15.02   1
 -13  -6   4   43.37   18.02   1
 -12  -6   4  163.25   18.20   1
  12  -6  -4  150.96   30.24   3
 -12  -6   4  232.26   32.04   4
 -12   6   4  164.78   15.37   1
 -11  -6   4  320.99   21.00   1
  11  -6  -4  272.88   34.22   3
 -11   6   4  312.30   19.40   1
 -11  -6   4  304.99   32.16   4
 -10  -6   4    4.27   10.45   1
  10  -6  -4   15.98   30.83   3
 -10  -6   4   33.94   25.13   4
 -10   6   4   16.55    8.86   1
  -9   6   4  707.33   34.26   1
  -9  -6   4  666.97   35.04   1
   9  -6  -4  643.03   56.69   3
  -9  -6   4  665.79   49.11   4
  -8  -6   4   42.33   13.12   1
   8  -6  -4   34.13   25.65   3
  -8   6   4   56.30   10.92   1
  -7  -6   4   82.58   13.05   1
   7  -6  -4   77.16   27.81   3
   7  -6  -4   93.24   12.61   4
  -7  -6   4  125.24   18.26   4
  -6  -6   4    1.19    5.06   4
   6  -6  -4   -7.23   10.26   3
  -6  -6   4   18.87   10.67   1
   6  -6  -4    1.78   37.64   4
   5  -6  -4  258.62   16.85   4
  -5  -6   4  261.63   14.75   1
   5  -6  -4  186.55   30.49   3
  -5  -6   4  253.33   21.47   4
  -4  -6   4   11.87    7.10   1
   4  -6  -4   -3.97    7.13   4
   4  -6  -4   28.92   15.31   3
   3  -6  -4 2876.51  149.36   4
  -3  -6   4 2699.09  129.88   1
   3  -6  -4 2683.67  205.04   3
  -3  -6   4 2659.08  149.96   4
   2  -6  -4   44.26   12.00   4
  -2  -6   4   43.31    5.49   1
   2  -6  -4   52.99   17.79   3
  -2  -6   4   54.78   12.19   4
  -1  -6   4    1.21   56.90   4
   1  -6  -4   19.67   17.99   3
  -1  -6   4   12.38    3.95   1
   1  -6  -4    6.90   10.87   4
   1  -6  -4   -0.29   19.23   2
   0  -6  -4  208.63   17.09   4
   0  -6  -4  230.29   13.33   1
   0  -6   4  228.94   16.82   4
   0  -6  -4  210.75   25.52   3
   0  -6  -4  209.28   18.69   2
   0  -6   4  225.02   23.40   3
  -1  -6  -4    3.87    4.05   1
  -1  -6  -4    5.40   14.84   2
   1  -6   4   -0.33    0.76   1
   1  -6   4   -2.19   38.44   3
   1  -6   4   -3.53   22.46   4
  -2  -6  -4   11.12    7.89   1
  -2  -6  -4   -5.10    6.85   4
   2  -6   4   -6.62   10.42   3
   2  -6   4    2.16    7.20   4
  -2  -6  -4    7.25   10.30   2
  -2  -6  -4   -6.05   27.68   3
  -3  -6  -4 1619.33  128.02   3
  -3  -6  -4 1571.17   94.23   4
  -3  -6  -4 1706.24   95.47   2
  -3  -6  -4 1749.11   81.81   1
   3  -6   4 1708.66  126.74   3
   3  -6   4 1756.57   93.53   4
  -4  -6  -4   75.70   17.30   2
  -4  -6  -4   72.58   23.38   4
  -4   6  -4   62.94    6.10   1
   4  -6   4   56.27   13.86   3
  -4  -6  -4   55.41   13.78   1
  -4  -6  -4   67.62   21.65   3
  -5  -6  -4   23.91   12.48   2
  -5   6  -4    7.87    5.42   1
  -5  -6  -4   58.82   23.68   4
   5  -6   4   -7.06   16.12   3
  -5  -6  -4    5.47   13.32   1
  -6   6  -4   65.15    7.37   1
  -6  -6  -4   67.28   15.67   1
   6  -6   4   66.17   15.06   3
  -6  -6  -4   99.24   19.17   2
  -6  -6  -4  145.35   25.30   4
   7  -6   4  238.85   22.94   3
  -7   6  -4  254.12   14.18   1
  -7  -6  -4  260.76   26.43   2
  -7  -6  -4  323.74   21.50   1
  -7  -6  -4  308.35   29.66   4
  -8  -6  -4   44.86   17.30   1
  -9  -6  -4  573.32   32.91   1
 -10  -6  -4   29.55   23.02   1
 -11  -6  -4    7.14   12.19   1
 -12  -6  -4   12.28   25.10   1
 -13  -6  -4  174.53   24.82   1
 -13   6  -4  112.78   36.48   2
 -14  -6  -4   14.47   24.65   1
 -14   6  -4   13.63   21.53   2
 -17  -7   4   69.57   23.23   1
 -16  -7   4   48.16   19.54   1
 -15  -7   4   67.22   20.11   1
  14  -7  -4   25.73   35.18   3
 -14  -7   4  112.68   35.09   4
 -14  -7   4   52.06   16.65   1
 -13  -7   4  254.92   20.73   1
  13  -7  -4  218.79   34.05   3
 -13  -7   4  363.55   34.12   4
 -12  -7   4   33.07   15.41   1
  12  -7  -4    0.80   12.79   3
 -12  -7   4   65.03   26.15   4
  11  -7  -4  354.86   38.18   3
 -11  -7   4  465.73   38.66   4
 -11  -7   4  387.10   24.23   1
 -11   7   4  425.65   22.64   1
 -10   7   4   71.30   11.79   1
 -10  -7   4   70.48   27.96   4
 -10  -7   4   48.45   14.52   1
  10  -7  -4   80.81   23.72   3
   9  -7  -4   85.80   12.68   4
   9  -7  -4   75.08   27.91   3
  -9  -7   4   93.80   13.89   1
  -9   7   4   95.00   11.62   1
  -9  -7   4   62.06   30.85   4
   8  -7  -4   24.07   11.47   4
  -8  -7   4   35.47   13.56   1
  -8   7   4   34.97   10.78   1
   8  -7  -4    9.22  158.23   3
   7  -7  -4  641.32   38.12   4
  -7  -7   4  670.54   40.56   4
  -7   7   4  693.33   33.11   1
  -7  -7   4  670.21   33.78   1
   7  -7  -4  632.92   55.55   3
   6  -7  -4   65.10   14.09   4
  -6  -7   4   54.99   18.93   4
   6  -7  -4   55.47   19.94   3
  -6  -7   4   50.58   11.09   1
  -5  -7   4  411.32   21.14   1
   5  -7  -4  398.81   24.53   4
   5  -7  -4  438.26   36.58   3
  -5  -7   4  367.01   29.22   4
   4  -7  -4   31.52   11.79   4
  -4  -7   4   22.58    7.12   1
   4  -7  -4   27.93   21.40   3
  -3  -7   4  804.74   47.56   4
   3  -7  -4  827.74   46.73   4
   3  -7  -4  831.54   65.57   3
  -3  -7   4  857.80   40.34   1
   2  -7  -4  239.95   29.19   3
   2  -7  -4  231.25   18.18   4
  -2  -7   4  219.82   12.06   1
  -2  -7   4  245.65   18.52   4
   1  -7  -4  824.71   46.53   4
  -1  -7   4  865.26   46.99   4
   1  -7  -4  891.74   64.83   3
  -1  -7   4  729.36   39.07   1
   0  -7  -4   22.54   13.32   4
   0  -7   4   10.26   14.25   3
   0  -7  -4   -1.85   15.60   3
   0  -7  -4   -8.20   10.50   2
   0  -7  -4    6.49    6.14   1
  -1  -7  -4 1236.60   97.67   3
  -1  -7  -4 1237.06   71.04   4
  -1  -7  -4 1222.59   72.65   2
   1  -7   4 1351.22   71.22   4
   1  -7   4 1254.89   96.61   3
  -1  -7  -4 1308.55   61.65   1
   2  -7   4   95.61   15.39   4
  -2  -7  -4   71.20   26.35   3
   2  -7   4  104.17   18.43   3
  -2  -7  -4   67.88   28.87   4
  -2  -7  -4   99.93   20.08   2
  -2  -7  -4   87.44   11.55   1
  -3  -7  -4  288.89   23.48   2
   3  -7   4  272.97   20.37   4
  -3  -7  -4  274.01   30.09   4
  -3  -7  -4  227.52   30.42   3
   3  -7   4  231.96   23.93   3
  -3  -7  -4  249.21   17.08   1
   4  -7   4   46.46   13.79   4
  -4  -7  -4   65.63   17.89   2
  -4  -7  -4   51.82   13.24   1
  -4  -7  -4   50.01   26.90   4
  -4  -7  -4   73.70   24.37   3
   4  -7   4   50.97   15.05   3
   5  -7   4  682.39   57.57   3
  -5  -7  -4  727.49   50.07   4
  -5  -7  -4  786.08   45.91   2
   5  -7   4  832.95   43.91   4
  -5  -7  -4  728.22   38.80   1
  -6  -7  -4   17.72   15.59   4
  -6  -7  -4   14.85   12.93   1
   6  -7   4   -1.92   41.07   3
  -6  -7  -4    9.20   13.09   2
  -7  -7  -4  410.41   34.91   4
  -7  -7  -4  387.51   27.54   2
  -7  -7  -4  402.63   25.35   1
  -8  -7  -4   44.23   26.35   4
  -8  -7  -4   19.96   21.32   1
  -9  -7  -4  139.28   20.97   1
 -10  -7  -4   -9.78   15.49   1
 -11  -7  -4  871.00   47.91   1
 -12  -7  -4   28.82   25.60   1
 -13  -7  -4  274.45   30.22   1
 -13   7  -4  355.90   40.02   2
 -14  -7  -4   -7.59   29.91   1
 -15   7  -4   18.81   26.11   2
 -16  -8   4    5.58   66.05   1
 -15  -8   4  181.80   22.03   1
 -14  -8   4   65.82   36.27   4
 -14  -8   4    2.38   69.99   1
 -13  -8   4  138.93   30.97   4
 -13  -8   4   87.53   16.73   1
  13  -8  -4   57.86   30.50   3
 -12  -8   4   -6.18   18.40   1
 -12  -8   4   46.88   31.42   4
 -11  -8   4  110.46   31.56   4
 -11  -8   4   54.95   14.73   1
  11  -8  -4   75.02   13.84   4
  11  -8  -4   38.34   27.54   3
  10  -8  -4   27.91   13.21   4
 -10  -8   4   39.14   12.70   1
  10  -8  -4   19.66   25.84   3
 -10  -8   4   14.11   50.26   4
   9  -8  -4  290.34   20.75   4
  -9  -8   4  312.20   18.71   1
  -9  -8   4  308.30   32.11   4
   9  -8  -4  301.05   29.19   3
   8  -8  -4   26.78   17.43   3
   8  -8  -4   25.29   12.10   4
  -8  -8   4   31.87    9.58   1
  -8  -8   4   45.04   16.61   4
  -7  -8   4   92.22   11.44   1
   7  -8  -4   93.99   14.62   4
  -7   8   4   86.93   11.04   1
   7  -8  -4  104.33   22.22   3
  -7  -8   4  117.14   20.79   4
  -6  -8   4   16.96    9.17   1
   6  -8  -4   38.94   13.41   4
  -6  -8   4   43.54   21.17   4
   6  -8  -4   51.61   21.91   3
  -5  -8   4  513.40   36.01   4
   5  -8  -4  553.71   32.58   4
  -5  -8   4  573.42   27.97   1
   5  -8  -4  549.88   46.96   3
  -4  -8   4   17.29    7.03   1
   4  -8  -4   23.84   12.08   4
   4  -8  -4   10.86   23.80   3
  -3  -8   4  616.95   38.12   4
   3  -8  -4  669.66   54.11   3
   3  -8  -4  640.35   37.04   4
  -3  -8   4  648.05   31.53   1
  -2  -8   4  106.84   16.63   4
  -2  -8   4   83.96    6.99   1
   2  -8  -4  128.36   27.79   3
   2  -8  -4  105.65   17.06   4
  -1  -8   4  233.83   29.15   3
   1  -8  -4  234.06   30.57   3
   1  -8  -4  221.40   19.27   4
  -1  -8   4  194.10   19.10   4
   0  -8  -4  323.44   23.32   4
   0  -8  -4  331.44   34.82   3
   0  -8   4  320.25   31.82   3
   0  -8   4  294.08   24.13   4
  -1  -8  -4   53.30   21.12   2
  -1  -8  -4   53.76   15.45   4
   1  -8   4   63.94   17.93   3
  -1  -8  -4   49.92    9.79   1
   1  -8   4   53.39   16.48   4
  -1  -8  -4   39.85   29.77   3
  -2  -8  -4    9.55    8.90   1
  -2  -8  -4    8.78   34.12   3
   2  -8   4    4.69   16.13   4
   2  -8   4   -0.31    1.85   3
  -3  -8  -4  281.26   32.35   4
   3  -8   4  329.19   23.27   4
  -3  -8  -4  341.17   27.57   2
  -3  -8  -4  332.81   19.43   1
   3  -8   4  288.79   29.04   3
  -3  -8  -4  347.96   37.53   3
  -4  -8  -4    1.12    3.25   2
  -4  -8  -4    8.25   12.25   1
   4  -8   4    8.98   19.04   3
   4  -8   4   -2.07   10.52   4
  -4  -8  -4  -10.59   11.85   4
  -4  -8  -4   43.51   21.61   3
   5  -8   4   -4.56   14.50   3
  -5  -8  -4    2.60   17.54   1
  -5  -8  -4   12.40   25.39   4
  -5  -8  -4   -7.06   10.78   2
   5  -8   4    2.26   14.59   4
   6  -8   4   15.20   13.99   4
   6  -8   4   -1.80    7.80   3
  -6  -8  -4    6.82   13.56   1
  -6  -8  -4   -0.49    5.76   2
  -6  -8  -4   42.89   19.19   4
  -7  -8  -4  394.56   23.70   1
  -7  -8  -4  399.89   35.13   4
  -7  -8  -4  346.56   27.10   2
  -8  -8  -4   27.42   16.34   1
  -8  -8  -4   35.39   20.92   4
  -9  -8  -4  546.50   32.30   1
 -10  -8  -4   19.75   15.34   1
 -11  -8  -4   24.55   19.94   1
 -12  -8  -4    2.18   24.38   1
 -13  -8  -4   82.95   26.31   1
 -13   8  -4    8.69  485.82   2
 -14   8  -4   -8.06   28.70   2
 -16  -9   4   11.02   19.02   1
 -15  -9   4   -9.48   19.35   1
 -15  -9   4  109.21   38.03   4
  14  -9  -4   33.91   28.04   3
 -14  -9   4   98.16   33.14   4
 -14  -9   4   12.75   27.53   1
  13  -9  -4  228.55   30.18   3
 -13  -9   4  365.58   36.44   4
 -13  -9   4  211.14   19.12   1
 -12  -9   4   56.59   15.22   1
  12  -9  -4   46.67   23.63   3
 -12  -9   4   68.70   28.09   4
  11  -9  -4  328.06   33.36   3
 -11  -9   4  356.54   21.15   1
 -11  -9   4  428.64   37.73   4
  10  -9  -4   27.71   20.66   3
 -10  -9   4   21.22   11.42   1
 -10  -9   4    4.87  237.63   4
  10  -9  -4    5.94    8.61   4
  -9  -9   4  129.61   30.57   4
   9  -9  -4  110.79   22.63   3
   9  -9  -4  156.70   15.79   4
  -9  -9   4  155.58   13.33   1
  -8  -9   4   42.54   17.24   4
  -8  -9   4   19.44   10.04   1
   8  -9  -4   11.55   15.18   4
   8  -9  -4   14.84   19.63   3
  -7  -9   4  131.14   11.83   1
   7  -9  -4  120.08   14.24   4
   7  -9  -4  128.08   22.75   3
  -7  -9   4  124.84   20.82   4
   6  -9  -4   66.93   21.88   3
  -6  -9   4   73.50    9.99   1
   6  -9  -4   68.72   12.93   4
  -6  -9   4   82.35   20.75   4
   5  -9  -4   31.62   12.81   4
  -5  -9   4   36.05    9.06   1
   5  -9  -4   30.74   29.02   3
  -5  -9   4   19.79   23.85   4
   4  -9  -4   36.79   27.12   3
   4  -9  -4   20.16   10.49   4
  -4  -9   4   16.70    7.03   1
   3  -9  -4   40.39   13.14   4
   3  -9  -4   16.03   28.15   3
  -3  -9   4   29.46   14.29   4
   2  -9  -4  358.66   37.92   3
   2  -9  -4  300.74   24.73   4
  -2  -9   4  321.98   25.39   4
   1  -9  -4 1259.78   75.56   4
  -1  -9   4 1292.61   76.10   4
   1  -9  -4 1425.15  104.74   3
  -1  -9   4 1429.90  104.32   3
   0  -9   4  373.98   26.43   4
   0  -9  -4  381.72   28.15   4
   0  -9  -4  417.74   39.87   3
   0  -9   4  391.12   36.78   3
  -1  -9  -4  164.28   19.46   4
  -1  -9  -4  149.96   12.51   1
   1  -9   4  130.48   18.80   4
   1  -9   4  157.75   22.99   3
  -1  -9  -4  148.20   29.24   3
  -2  -9  -4   41.18   26.05   3
   2  -9   4   22.09   16.49   4
  -2  -9  -4   24.49   37.38   4
  -2  -9  -4   29.28    9.48   1
   2  -9   4   41.03   20.41   3
  -3  -9  -4   -6.25   10.13   4
   3  -9   4    9.96   12.28   3
  -3  -9  -4    5.84    8.88   2
  -3  -9  -4   -1.50   23.06   1
  -3  -9  -4   39.20   25.02   3
   3  -9   4    4.74    9.69   4
  -4  -9  -4   37.08   20.79   3
  -4  -9  -4    8.70   10.43   1
   4  -9   4   12.07   14.04   4
  -4  -9  -4    4.55   41.66   4
   4  -9   4   11.74   11.90   3
   5  -9   4  166.59   16.56   4
  -5  -9  -4  160.63   14.46   1
  -5  -9  -4  150.92   28.09   4
   5  -9   4  110.99   18.04   3
  -5  -9  -4  131.30   20.46   2
   6  -9   4   28.57   15.17   4
  -6  -9  -4   24.62   14.50   1
  -6  -9  -4   35.34   28.04   4
   6  -9   4   21.89   12.74   3
  -6  -9  -4   28.18   20.11   2
   7  -9   4   17.52   14.43   4
  -7  -9  -4   54.15   30.06   4
  -7  -9  -4    1.23   29.98   1
   8  -9   4   27.29   15.58   4
  -8  -9  -4    2.68   28.70   1
  -8  -9  -4   71.54   25.44   4
  -9  -9  -4   19.59   22.92   1
   9  -9   4   46.37   17.19   4
  -9  -9  -4   94.06   28.40   4
 -10  -9  -4  175.06   22.28   1
 -11  -9  -4  134.63   24.51   1
 -12  -9  -4   51.69   23.75   1
 -13  -9  -4   35.39   25.61   1
 -15 -10   4  116.09   35.93   4
 -15 -10   4   61.04   18.88   1
 -14 -10   4  128.93   34.70   4
 -14 -10   4   47.79   18.37   1
  13 -10  -4   18.56   25.14   3
 -13 -10   4   -8.38   11.72   1
 -13 -10   4   76.26   27.64   4
 -12 -10   4    9.49   14.07   1
  12 -10  -4   19.70   23.62   3
 -12 -10   4   23.78   31.16   4
 -11 -10   4   62.48   13.51   1
 -11 -10   4   64.61   29.92   4
  11 -10  -4   52.69   21.33   3
 -10 -10   4   40.44   12.20   1
  10 -10  -4   50.60   21.37   3
 -10 -10   4   37.89   35.29   4
  -9 -10   4  127.10   31.05   4
  -9 -10   4  166.60   14.05   1
   9 -10  -4  166.16   23.40   3
   9 -10  -4  136.11   15.86   4
   8 -10  -4  173.32   23.98   3
  -8 -10   4  128.70   12.67   1
  -8 -10   4  169.60   21.44   4
   8 -10  -4  119.21   15.45   4
  -7 -10   4   48.17   18.16   4
  -7 -10   4   23.21    9.34   1
   7 -10  -4    7.51   11.82   4
   7 -10  -4   19.74   25.25   3
  -6 -10   4  208.81   12.97   1
   6 -10  -4  173.82   25.95   3
   6 -10  -4  183.46   16.68   4
  -6 -10   4  205.14   22.43   4
  -5 -10   4  309.36   24.96   4
   5 -10  -4  279.91   20.85   4
   5 -10  -4  305.70   31.73   3
   4 -10  -4  441.40   38.68   3
  -4 -10   4  401.94   29.32   4
   4 -10  -4  371.06   25.67   4
   3 -10  -4  299.98   22.32   4
   3 -10  -4  354.19   34.80   3
  -3 -10   4  328.57   23.61   4
  -2 -10   4  122.81   17.47   4
   2 -10  -4  110.25   17.42   4
   2 -10  -4   96.12   27.33   3
   1 -10  -4   85.97   26.62   3
   1 -10  -4   78.84   17.03   4
  -1 -10   4   67.39   16.65   4
   0 -10   4   28.12   17.14   4
   0 -10  -4   27.67   27.10   3
   0 -10   4   42.85   21.45   3
   0 -10  -4   29.22   16.14   4
  -1 -10  -4  371.04   25.06   4
   1 -10   4  335.53   24.63   4
  -1 -10  -4  382.71   19.58   1
   1 -10   4  327.76   32.41   3
  -1 -10  -4  385.84   35.88   3
  -2 -10  -4  150.38   12.21   1
   2 -10   4  130.29   20.10   3
   2 -10   4  136.06   17.42   4
  -2 -10  -4  144.47   29.88   3
  -2 -10  -4  155.23   20.26   4
   3 -10   4  154.66   21.05   3
  -3 -10  -4  203.83   28.49   3
  -3 -10  -4  190.80   14.18   1
  -3 -10  -4  152.57   27.94   4
   3 -10   4  168.84   16.92   4
   4 -10   4   81.17   17.49   3
   4 -10   4   53.29   14.98   4
  -4 -10  -4   93.84   25.28   3
  -4 -10  -4   91.71   29.38   4
  -4 -10  -4   78.00   12.76   1
  -5 -10  -4   85.35   14.41   1
   5 -10   4   83.65   18.13   3
   5 -10   4  103.73   16.65   4
  -5 -10  -4   77.35   30.27   4
  -6 -10  -4  473.55   38.40   4
   6 -10   4  502.57   30.00   4
  -6 -10  -4  448.59   25.49   1
  -6 -10  -4  403.26   30.29   2
   6 -10   4  421.68   36.95   3
   7 -10   4  337.88   25.03   4
  -7 -10  -4  338.48   34.32   4
  -7 -10  -4  364.88   22.99   1
   8 -10   4  225.33   21.81   4
  -8 -10  -4  175.98   19.88   1
  -8 -10  -4  272.57   32.34   4
  -9 -10  -4  127.94   20.33   1
  -9 -10  -4  196.55   35.11   4
   9 -10   4  179.58   21.62   4
 -10 -10  -4  286.31   24.93   1
  10 -10   4  309.33   25.96   4
  11 -10   4   49.94   22.29   4
 -11 -10  -4   36.75   22.80   1
 -12 -10  -4   12.75   34.41   1
  12 -10   4   32.00   18.91   4
 -15 -11   4   -0.24    1.60   1
 -14 -11   4   32.37   28.51   4
 -14 -11   4    7.42   14.66   1
 -13 -11   4    6.79   12.29   1
 -13 -11   4   70.86   35.38   4
  13 -11  -4   22.00   30.55   3
 -12 -11   4  182.42   33.94   4
  12 -11  -4  143.33   26.50   3
 -12 -11   4  121.81   16.15   1
 -11 -11   4   63.72   36.95   4
  11 -11  -4   80.75   23.43   3
 -11 -11   4   55.27   13.99   1
 -10 -11   4  114.42   32.65   4
  10 -11  -4   84.09   23.83   3
 -10 -11   4   99.32   13.40   1
  -9 -11   4  164.59   29.23   4
   9 -11  -4  198.82   25.34   3
   8 -11  -4   -2.44   23.39   3
  -8 -11   4   30.28   18.34   4
  -7 -11   4   33.55   15.47   4
   7 -11  -4   26.57   23.93   3
   7 -11  -4    5.45   17.70   4
   6 -11  -4   39.60   22.26   3
  -6 -11   4   49.61   19.43   4
   6 -11  -4   26.87   14.34   4
   5 -11  -4  176.64   27.89   3
   5 -11  -4  191.60   17.63   4
  -5 -11   4  203.64   22.98   4
   4 -11  -4   62.42   25.49   3
   4 -11  -4   49.41   14.64   4
  -4 -11   4   43.93   24.36   4
   3 -11  -4  161.72   18.68   4
  -3 -11   4  154.02   22.05   4
   3 -11  -4  172.53   29.43   3
   2 -11  -4  136.95   18.81   4
  -2 -11   4  163.78   17.91   4
   2 -11  -4  156.45   28.10   3
   1 -11  -4  304.86   36.38   3
   1 -11  -4  272.14   22.39   4
  -1 -11   4  259.07   23.39   4
   0 -11   4   71.62   21.20   3
   0 -11  -4   65.28   26.45   3
   0 -11   4   61.10   16.84   4
   0 -11  -4   70.96   15.95   4
  -1 -11  -4  218.67   30.38   3
  -1 -11  -4  245.63   20.77   4
   1 -11   4  199.45   20.43   4
   1 -11   4  204.34   23.87   3
   2 -11   4   58.49   20.01   3
  -2 -11  -4   94.37   17.13   4
  -2 -11  -4   78.59   24.88   3
   2 -11   4   51.91   16.55   4
   3 -11   4   26.27   16.04   3
  -3 -11  -4   55.81   24.58   3
  -3 -11  -4   27.59   34.20   4
   3 -11   4   40.20   15.93   4
  -3 -11  -4   38.84   11.38   1
  -4 -11  -4    8.44  161.54   3
  -4 -11  -4    5.86   11.87   1
   4 -11   4    7.14   11.28   3
  -4 -11  -4   -1.32    3.84   4
   4 -11   4    9.19   15.60   4
   5 -11   4  111.00   20.84   3
  -5 -11  -4  125.43   14.87   1
   5 -11   4   98.38   18.76   4
  -5 -11  -4  161.28   31.28   4
  -6 -11  -4   60.19   26.75   4
   6 -11   4   22.45   18.52   3
   6 -11   4   14.92   14.75   4
  -6 -11  -4   11.63   32.47   1
  -7 -11  -4  104.26   17.00   1
  -7 -11  -4  159.74   29.70   4
   7 -11   4   94.09   19.39   4
  -8 -11  -4    8.67   12.36   1
  -8 -11  -4   23.37   21.13   4
   8 -11   4   -6.25   18.25   4
   9 -11   4   70.84   20.41   4
  -9 -11  -4   87.02   30.73   4
  -9 -11  -4   49.62   19.18   1
  10 -11   4   59.98   21.84   4
 -10 -11  -4  154.29   35.69   4
 -10 -11  -4   30.39   21.26   1
  11 -11   4  124.18   25.92   4
 -11 -11  -4  107.12   22.61   1
  12 -11   4   94.28   24.77   4
 -12 -11  -4   69.92   25.06   1
 -13 -12   4   10.38   33.43   4
  13 -12  -4    2.50   12.41   3
  12 -12  -4    2.92   33.81   3
 -12 -12   4   18.18   49.50   4
 -11 -12   4   16.70   36.77   4
  11 -12  -4   -6.63   27.97   3
  10 -12  -4   73.92   24.23   3
 -10 -12   4   79.31   33.11   4
  -9 -12   4   65.43   37.73   4
   9 -12  -4   63.64   23.98   3
   8 -12  -4   61.68   22.80   3
  -8 -12   4  109.81   21.48   4
  -7 -12   4   53.06   19.53   4
   7 -12  -4   19.70   20.56   3
   6 -12  -4   47.30   25.00   3
   6 -12  -4   47.01   15.32   4
  -6 -12   4   65.98   19.63   4
   5 -12  -4   15.45   13.76   4
   5 -12  -4   11.21   25.73   3
  -5 -12   4   12.15   13.81   4
  -4 -12   4  221.89   24.62   4
   4 -12  -4  224.10   30.07   3
   4 -12  -4  245.54   20.34   4
   3 -12  -4   39.17   18.07   4
  -3 -12   4   29.78   24.60   4
   3 -12  -4   44.31   24.94   3
   2 -12  -4   28.83   18.91   4
   2 -12  -4   39.60   31.70   3
  -2 -12   4   37.43   17.06   4
  -1 -12   4   41.64   16.54   4
   1 -12  -4   -2.10    6.95   4
   0 -12   4   26.13   19.17   3
   0 -12  -4   28.01   14.61   4
   0 -12   4   23.75   16.96   4
   0 -12  -4   -0.90    6.71   3
   1 -12   4   18.23   16.83   3
  -1 -12  -4    5.01   15.52   3
  -1 -12  -4   15.01   15.86   4
   1 -12   4   -7.31   19.65   4
   2 -12   4   91.94   18.68   4
  -2 -12  -4  153.04   19.09   4
   2 -12   4   77.86   20.22   3
  -2 -12  -4  147.00   28.68   3
  -3 -12  -4   98.85   27.78   3
  -3 -12  -4   53.21   27.26   4
   3 -12   4   84.36   18.36   4
   3 -12   4   92.81   20.86   3
   4 -12   4   14.08   17.12   3
  -4 -12  -4   13.20   33.65   4
  -4 -12  -4   28.99   30.44   3
   5 -12   4    2.87    8.12   3
   5 -12   4    8.06   29.75   4
   6 -12   4    4.92   56.10   4
  -7 -12  -4   16.73   14.30   1
  -7 -12  -4   30.35   29.12   4
  -8 -12  -4  174.48   32.82   4
   8 -12   4  108.12   21.86   4
  -8 -12  -4  106.89   18.29   1
  -9 -12  -4   87.12   33.48   4
  -9 -12  -4    1.60   26.19   1
   9 -12   4    3.66   44.93   4
 -10 -12  -4   28.97   26.12   4
 -10 -12  -4    4.30   15.50   1
  10 -12   4    3.25   14.20   4
 -11 -12  -4   30.92   20.10   1
  11 -12   4   14.02   19.11   4
  12 -13  -4   69.98   27.43   3
  11 -13  -4    2.26   45.53   3
 -11 -13   4    0.46   21.29   4
 -10 -13   4   13.22   50.31   4
  10 -13  -4    3.12   46.15   3
   9 -13  -4    1.58   36.22   3
  -8 -13   4  182.86   25.70   4
   8 -13  -4  129.76   27.23   3
   7 -13  -4   53.11   25.23   3
  -7 -13   4   84.98   22.01   4
   6 -13  -4  151.83   27.64   3
  -6 -13   4  231.45   23.81   4
   5 -13  -4   34.50   15.75   4
   5 -13  -4   18.93   31.50   3
  -5 -13   4   25.82   25.15   4
   4 -13  -4    4.42   54.87   4
  -4 -13   4   12.43   34.69   4
   4 -13  -4    5.64   36.61   3
   3 -13  -4  116.51   28.05   3
  -3 -13   4  109.21   23.36   4
   3 -13  -4   95.36   19.93   4
  -2 -13   4   44.45   19.81   4
   2 -13  -4   35.23   19.24   4
   2 -13  -4   37.02   29.25   3
  -1 -13   4   17.55   14.93   4
   1 -13  -4   14.69   16.89   4
   1 -13  -4    8.34   19.53   3
   0 -13  -4  242.93   23.19   4
   0 -13   4  239.52   22.88   4
   0 -13  -4  291.28   34.03   3
   1 -13   4   34.34   21.88   3
  -1 -13  -4   31.18   16.19   4
   1 -13   4   14.52   19.39   4
  -1 -13  -4   35.55   26.25   3
  -2 -13  -4    5.55   16.88   3
   2 -13   4   11.50   18.60   3
  -2 -13  -4   -8.48   17.68   4
   2 -13   4   15.26   24.61   4
   3 -13   4   18.06   17.98   3
  -3 -13  -4    5.76   12.56   3
  -4 -13  -4  132.44   30.24   4
   4 -13   4   98.51   19.66   4
  -4 -13  -4  180.99   32.15   3
   4 -13   4  112.62   23.08   3
  -5 -13  -4   17.78   32.12   4
   5 -13   4   39.08   20.50   4
   5 -13   4   45.65   21.47   3
   6 -13   4  246.30   25.26   4
  -6 -13  -4  354.04   34.11   4
  -7 -13  -4   17.89   28.92   4
   7 -13   4   -1.04    4.23   4
  -8 -13  -4   79.12   30.04   4
   8 -13   4    5.87   35.66   4
  -9 -13  -4   29.26   25.05   4
  11 -14  -4    9.47   24.93   3
  10 -14  -4   99.21   26.31   3
 -10 -14   4   88.95   38.29   4
   9 -14  -4    8.79   27.28   3
   8 -14  -4   79.63   27.33   3
  -8 -14   4  145.41   23.92   4
  -7 -14   4   30.23   21.60   4
  -6 -14   4    2.06   34.11   4
   6 -14  -4    5.18   35.04   3
  -5 -14   4   -7.86   51.27   4
   5 -14  -4    0.28    9.08   3
  -4 -14   4  207.84   26.52   4
   4 -14  -4  205.40   33.86   3
   3 -14  -4    4.89   23.31   3
  -3 -14   4   -7.58   33.39   4
   2 -14  -4  135.15   21.00   4
   2 -14  -4  168.02   31.43   3
  -2 -14   4  151.61   24.50   4
  -1 -14   4   11.16   13.74   4
   1 -14  -4    0.18    2.43   4
   0 -14   4   96.63   19.31   4
   0 -14  -4   63.56   20.62   4
   0 -14  -4   83.42   33.11   3
  -1 -14  -4   60.10   18.59   4
   1 -14   4   28.78   20.42   4
  -1 -14  -4   46.11   25.84   3
  -2 -14  -4  164.29   32.14   3
  -2 -14  -4  107.03   29.38   4
   2 -14   4  134.32   25.96   3
   2 -14   4  139.95   21.33   4
   3 -14   4    2.18   15.25   4
   3 -14   4   24.24   22.23   3
  -3 -14  -4    4.01   50.08   3
   4 -14   4  156.05   25.96   3
   4 -14   4  146.45   21.33   4
  -4 -14  -4  160.93   31.71   4
   5 -14   4   15.44   24.51   3
  -5 -14  -4   -1.72   18.71   4
   5 -14   4   -0.63    7.39   4
  -6 -14  -4   46.54   25.87   4
   6 -14   4   42.36   20.83   4
   7 -14   4   -5.12   17.23   4
  -7 -14  -4    5.82   52.73   4
  -8 -14  -4  109.96   32.18   4
   8 -14   4   61.70   23.21   4
   9 -15  -4    1.42    9.23   3
   8 -15  -4    0.80   63.70   3
  -8 -15   4   -0.82    5.42   4
  -7 -15   4   42.65   23.45   4
   7 -15  -4    9.08   37.78   3
   6 -15  -4   54.28   28.73   3
  -6 -15   4   77.89   24.62   4
   5 -15  -4    2.83   59.50   3
  -5 -15   4   21.84   18.00   4
  -4 -15   4    5.98   50.96   4
   4 -15  -4   23.05   27.15   3
  -3 -15   4   -4.91   13.29   4
   3 -15  -4    1.05   35.71   3
   2 -15  -4    6.13   19.66   3
   1 -15  -4   -3.02   19.17   4
   1 -15  -4   15.26   25.95   3
   0 -15  -4   56.15   31.79   3
   0 -15  -4   51.26   20.48   4
   0 -15   4   31.44   19.51   4
  -1 -15  -4   31.48   32.04   3
   1 -15   4    1.93    8.93   4
  -1 -15  -4   44.51   19.35   4
  -2 -15  -4   23.33   27.10   3
   2 -15   4   -7.79   23.13   4
  -3 -15  -4   40.95   25.86   3
   3 -15   4   -0.87   14.65   4
   3 -15   4   23.22   29.29   3
   4 -15   4  105.81   23.18   4
   4 -15   4   99.49   26.01   3
  -4 -15  -4   94.15   31.24   4
  -5 -15  -4    5.51   25.32   4
   5 -15   4   12.18   30.32   4
  -6 -15  -4   96.63   30.60   4
   6 -15   4   56.29   22.60   4
  -5 -16   4   35.46   23.55   4
   5 -16  -4   17.96   22.22   3
  -4 -16   4   25.84   19.45   4
   4 -16  -4   64.04   31.25   3
   3 -16  -4   31.96   30.92   3
  -3 -16   4   28.97   25.26   4
   2 -16  -4   12.83   27.65   3
   1 -16  -4   23.08   25.41   3
   0 -16  -4   10.29   28.05   3
   1 -16   4   44.38   21.94   4
  -1 -16  -4   24.71   23.09   4
  -1 -16  -4   53.11   33.08   3
   2 -16   4  106.48   22.73   4
  -2 -16  -4  129.14   35.46   3
  -2 -16  -4   54.13   30.75   4
  -3 -16  -4   19.27   33.89   4
   3 -16   4   43.09   20.81   4
  -4 -16  -4    5.45   33.62   4
 -19   0   5   97.59   22.65   1
 -18   0   5    2.05    4.12   1
 -17   0   5    7.75    9.57   1
  16   0  -5   88.93   34.76   3
 -15   0   5  126.39   19.79   1
  15   0  -5  188.08   37.63   3
  14   0  -5   99.43   32.35   3
 -14   0   5   -3.39   17.42   1
 -13   0   5   24.67   16.39   1
  13   0  -5  145.20   33.47   3
 -12   0   5   11.73   14.04   1
 -11   0   5  209.85   19.50   1
 -10   0   5    9.03   15.18   1
  -9   0   5  826.27   41.68   1
  -8   0   5    2.02   18.33   1
  -7   0   5 1679.31   80.93   1
  -6   0   5   17.99    7.86   4
   5   0  -5 1138.70   62.08   2
  -5   0   5 1080.53   61.03   4
  -4   0   5    7.69    3.57   4
   3   0  -5  500.49   27.51   2
  -3   0   5  439.06   25.78   4
  -2   0   5   -0.70    0.82   4
   1   0  -5  276.72   20.72   2
   0   0  -5    7.79   10.13   2
   0   0  -5   20.68    8.18   3
  -1   0  -5 4896.34  235.02   1
  -1   0  -5 5164.67  274.79   2
  -1   0  -5 4781.46  373.61   3
  -2   0  -5    7.24    6.73   1
  -2   0  -5   34.00   14.30   2
  -3   0  -5 3407.87  170.03   1
  -3   0  -5 3737.17  198.97   2
  -4   0  -5    4.12   14.27   2
  -4   0  -5    0.16    1.44   1
  -5   0  -5 1564.81   86.20   2
  -5   0  -5 1472.69   73.27   1
  -6   0  -5    1.49   14.26   1
  -6   0  -5   40.05   20.18   2
  -7   0  -5  835.73   42.17   1
  -7   0  -5  849.72   51.43   2
  -8   0  -5   17.62    8.17   1
  -8   0  -5   10.95   16.25   2
  -9   0  -5  418.66   32.29   2
  -9   0  -5  348.85   21.21   1
 -10   0  -5   -4.28   15.61   1
 -10   0  -5   28.21   21.97   2
 -11   0  -5  157.39   15.87   1
 -11   0  -5  209.85   25.80   2
 -12   0  -5   21.21   18.29   2
 -12   0  -5   -8.06   12.44   1
 -13   0  -5  257.13   20.30   1
 -14   0  -5   -5.04   12.84   1
 -15   0  -5  229.34   21.02   1
 -16   0  -5    8.62   27.57   1
 -19   1   5   42.62   22.32   1
 -18  -1   5   -1.88   12.27   1
 -18   1   5    4.94    9.56   1
 -17  -1   5  256.70   24.05   1
 -17   1   5  257.30   22.87   1
 -16  -1   5   70.21   18.84   1
 -16   1   5   85.37   18.37   1
  16   1  -5  156.23   35.03   3
  16  -1  -5   89.88   40.30   3
  15  -1  -5   51.00   33.92   3
 -15  -1   5   18.53   16.87   1
 -15   1   5   12.15   15.98   1
 -14  -1   5   -4.93   10.48   1
 -14   1   5    4.57   11.53   1
  14  -1  -5   48.62   32.77   3
 -13  -1   5  108.01   17.81   1
  13  -1  -5  148.43   36.69   3
 -13   1   5   81.81   14.95   1
  12  -1  -5  129.16   29.97   3
 -12  -1   5   -3.84   25.64   1
 -12   1   5   -3.80    5.75   1
  11  -1  -5  552.48   49.09   3
 -11   1   5  496.56   28.43   1
 -11  -1   5  494.69   28.82   1
 -10  -1   5  391.02   25.09   1
 -10   1   5  374.37   24.56   1
  10  -1  -5  471.55   40.89   3
   9  -1  -5  147.92   23.39   3
  -9   1   5    9.72   10.42   1
  -9  -1   5   16.53   14.75   1
  -8  -1   5  146.99   13.60   1
   8  -1  -5  244.58   25.63   3
  -8   1   5  153.95   14.16   1
  -8  -1   5  177.18   17.38   4
  -7  -1   5  830.87   49.87   4
   7  -1  -5  901.74   69.39   3
  -7  -1   5  918.52   43.70   1
  -6  -1   5   13.14   20.70   4
   5  -1  -5 1495.48   82.22   2
   5  -1  -5 1349.75  111.37   3
  -5  -1   5 1525.71   80.78   4
   5   1  -5 1499.75   81.81   2
   4  -1  -5  431.10   23.12   2
   4   1  -5  370.03   22.75   2
  -4  -1   5  390.56   22.55   4
   4  -1  -5  355.16   32.95   3
   3  -1  -5   -9.86    7.28   2
   3   1  -5   12.20   10.14   2
  -3  -1   5    5.64    6.87   4
   3  -1  -5   47.15   12.96   3
  -2  -1   5  114.33   10.03   4
   2  -1  -5  126.06   19.12   3
   2  -1  -5  150.58   13.30   2
   2   1  -5  141.50   14.02   2
   1  -1  -5 1370.54   75.89   2
   1   1  -5 1406.54   76.21   2
   1  -1  -5 1286.38  101.85   3
   0   1  -5  660.08   36.01   2
   0  -1  -5  603.05   35.76   2
   0  -1  -5  591.08   45.19   3
   0  -1  -5  540.38   29.16   1
  -1   1  -5 3437.41  182.03   2
  -1  -1  -5 3212.48  155.71   1
  -1  -1  -5 3379.75  182.03   2
  -1   1  -5 3161.55  155.44   1
  -1  -1  -5 3171.61  243.20   3
  -2  -1  -5  387.96   21.50   1
  -2  -1  -5  411.14   31.09   3
  -2   1  -5  428.59   20.54   1
  -2   1  -5  413.52   25.97   2
  -2  -1  -5  374.02   26.07   2
  -3  -1  -5   38.28   15.98   2
  -3  -1  -5   37.77    9.90   1
  -3   1  -5   40.90   16.33   2
  -3   1  -5   40.85    7.94   1
  -4   1  -5  188.34   11.13   1
  -4   1  -5  188.89   19.46   2
  -4  -1  -5  159.54   21.17   2
  -4  -1  -5  176.11   12.58   1
  -5  -1  -5  156.67   20.01   2
  -5   1  -5  111.02   10.90   1
  -5   1  -5  132.32   19.54   2
  -5  -1  -5  115.36   11.92   1
  -6  -1  -5   43.11   18.71   2
  -6  -1  -5    8.70    8.30   1
  -6   1  -5   43.48   23.72   2
  -6   1  -5   18.63   11.86   1
  -7  -1  -5   75.87   23.41   2
  -7  -1  -5   28.88   12.66   1
  -7   1  -5   44.26   10.63   1
  -7   1  -5   56.10   26.77   2
  -8  -1  -5  131.73   15.67   1
  -8   1  -5  138.10   25.01   2
  -8  -1  -5  152.54   26.67   2
  -8   1  -5  128.06   13.06   1
  -9  -1  -5   36.18   11.04   1
  -9  -1  -5   50.45   22.74   2
  -9   1  -5   14.54   14.45   1
  -9   1  -5   34.53   25.61   2
 -10  -1  -5   58.10   23.89   2
 -10   1  -5   12.07   12.39   1
 -10   1  -5   37.24   23.78   2
 -10  -1  -5   21.92   14.69   1
 -11  -1  -5  561.49   31.23   1
 -11   1  -5  582.66   41.24   2
 -11  -1  -5  568.47   41.96   2
 -11   1  -5  580.75   30.78   1
 -12   1  -5   37.45   24.20   2
 -12   1  -5    9.96   10.93   1
 -12  -1  -5   13.75   15.39   1
 -13  -1  -5  134.70   18.42   1
 -13   1  -5  134.07   16.84   1
 -14  -1  -5   -4.43   17.97   1
 -14   1  -5   -7.27   15.00   1
 -15   1  -5   -4.45   47.00   1
 -15  -1  -5   -6.34   13.47   1
 -16   1  -5   -6.96   10.63   1
 -19   2   5   54.66   23.37   1
 -18   2   5   13.54   31.99   1
 -18  -2   5    8.26   28.13   1
 -17  -2   5   15.89   15.99   1
 -17   2   5   24.78   26.35   1
  17   2  -5  192.08   42.20   3
 -16  -2   5    4.47   13.62   1
 -16   2   5    6.49   16.21   1
 -15  -2   5  252.98   23.22   1
 -15   2   5  250.35   20.64   1
  15  -2  -5  238.55   49.07   3
  14  -2  -5   10.69   81.66   3
 -14  -2   5   12.26   19.54   1
 -14   2   5    9.74   15.31   1
  13  -2  -5  319.84   49.24   3
 -13  -2   5  386.61   24.48   1
 -13   2   5  355.81   22.77   1
 -12   2   5   16.30   11.99   1
  12  -2  -5   34.57   39.05   3
 -12  -2   5   27.03   17.11   1
  11  -2  -5   53.95   33.02   3
 -10  -2   5   54.88   14.28   1
 -10  -2   5   80.12   21.24   4
  10  -2  -5   79.33   35.77   3
 -10   2   5   45.74   13.43   1
  -9  -2   5  728.06   36.90   1
  -9  -2   5  687.42   43.36   4
   9  -2  -5  692.28   62.31   3
  -9   2   5  740.74   36.35   1
  -8   2   5 1017.73   49.98   1
  -8  -2   5  980.05   57.79   4
  -8  -2   5 1053.98   50.27   1
   8  -2  -5 1011.71   79.77   3
  -7  -2   5 1410.77   66.31   1
  -7  -2   5 1392.69   76.03   4
   7  -2  -5 1282.49  104.26   3
   6  -2  -5   24.81   17.32   3
   6   2  -5    3.61    3.96   2
  -6  -2   5   -4.00   17.48   1
  -6  -2   5    0.54    1.15   4
  -5  -2   5   67.86   10.37   4
   5  -2  -5   76.57   25.43   3
   5  -2  -5   43.32   12.22   2
   5   2  -5   63.57    7.06   2
   4  -2  -5  109.64   25.23   3
  -4  -2   5  103.03   12.18   4
   4   2  -5  110.54   11.26   2
   4  -2  -5  144.70   11.72   2
  -3  -2   5  918.10   54.38   4
   3  -2  -5 1128.04   55.73   2
   3  -2  -5  950.18   75.86   3
   3   2  -5  945.38   55.55   2
   2   2  -5    7.41    8.72   2
   2  -2  -5   23.74   10.49   3
   2  -2  -5   -9.51    8.44   2
  -2  -2   5    7.38    9.22   4
   1  -2  -5  109.98   13.53   2
   1  -2  -5  109.40   16.13   3
   1   2  -5   92.62   14.15   2
  -1  -2   5  104.69    9.47   4
   0  -2  -5   52.24    9.45   1
   0   2  -5   51.68   14.35   2
   0  -2  -5   34.33   17.99   3
   0  -2  -5   64.69   11.27   2
  -1   2  -5    7.46    8.50   1
  -1  -2  -5   29.82    8.70   2
  -1   2  -5   10.12   16.09   2
  -1  -2  -5    7.80    9.55   1
  -1  -2  -5    6.48    8.36   3
  -2   2  -5 1494.15   85.74   2
  -2   2  -5 1569.63   73.00   1
  -2  -2  -5 1613.40  114.28   3
  -2  -2  -5 1424.24   86.00   2
  -2  -2  -5 1509.64   73.57   1
  -3  -2  -5 1657.49  129.93   3
  -3  -2  -5 1675.60   98.05   2
  -3  -2  -5 1772.12   83.91   1
  -3   2  -5 1844.21   83.27   1
  -3   2  -5 1750.49   97.84   2
  -4  -2  -5   49.33    8.19   1
  -4   2  -5   20.67    7.73   1
  -4   2  -5   27.30   21.90   2
  -4  -2  -5   29.68   16.86   2
  -5  -2  -5   -3.13   14.41   2
  -5   2  -5   15.85   21.32   2
  -5   2  -5    3.82   14.92   1
  -5  -2  -5    5.27    9.03   1
  -6  -2  -5   85.75   24.31   2
  -6   2  -5   61.47   10.11   1
  -6  -2  -5   94.24   14.28   1
  -6   2  -5   67.39   21.49   2
  -7  -2  -5    2.81    8.42   1
  -7  -2  -5   -4.50   34.29   2
  -7   2  -5    6.42    9.63   1
  -8  -2  -5   42.23   14.42   1
  -8   2  -5   54.99   22.74   2
  -8   2  -5   70.56   11.33   1
  -8  -2  -5   46.80   27.83   2
  -9   2  -5  639.55   31.75   1
  -9  -2  -5  617.02   43.40   2
  -9   2  -5  612.87   41.28   2
  -9  -2  -5  577.92   32.63   1
 -10  -2  -5  201.52   18.00   1
 -10   2  -5  230.33   16.14   1
 -10  -2  -5  279.48   30.04   2
 -10   2  -5  237.23   28.40   2
 -11   2  -5   -1.64    5.85   1
 -11   2  -5   31.59   28.15   2
 -11  -2  -5    5.68    8.98   1
 -12  -2  -5   39.94   16.05   1
 -12   2  -5   46.69   13.49   1
 -12   2  -5   81.12   26.23   2
 -13   2  -5   63.83   30.88   2
 -13   2  -5   50.77   15.06   1
 -13  -2  -5   48.77   18.98   1
 -14  -2  -5   36.58   21.86   1
 -14   2  -5   23.09   16.23   1
 -15  -2  -5  130.90   20.87   1
 -15   2  -5  115.18   19.35   1
 -16   2  -5   51.79   22.04   1
 -19   3   5   43.28   23.65   1
 -18   3   5   28.17   20.85   1
 -18  -3   5   39.69   22.46   1
 -17   3   5  189.07   21.22   1
 -17  -3   5  138.49   24.66   1
 -16   3   5   23.46   17.83   1
 -16  -3   5   20.82   21.09   1
 -15   3   5   40.99   16.02   1
 -15  -3   5   14.55   17.40   1
 -14  -3   5  113.82   18.71   1
 -14   3   5  121.41   16.59   1
  14  -3  -5   86.71   52.99   3
 -13   3   5  189.45   17.36   1
 -13  -3   5  195.59   18.81   1
  13  -3  -5   94.41   60.13   3
  12  -3  -5  268.50   50.26   3
 -12   3   5  273.42   18.60   1
 -12  -3   5  269.66   21.14   1
 -11  -3   5  114.51   18.26   1
  11  -3  -5   56.93   55.22   3
 -11  -3   5  122.27   24.80   4
 -11   3   5  125.88   15.51   1
 -10   3   5   22.20   12.85   1
 -10  -3   5   64.01   20.02   4
 -10  -3   5   29.13   14.71   1
  -9   3   5   94.95   13.35   1
  -9  -3   5  118.53   16.03   1
   9  -3  -5   89.94   34.66   3
  -9  -3   5  138.07   24.03   4
   8  -3  -5  358.80   45.28   3
  -8   3   5  397.84   21.70   1
  -8  -3   5  416.79   22.25   1
  -8  -3   5  399.56   30.31   4
   7  -3  -5 1435.87  111.23   3
  -7  -3   5 1475.99   80.53   4
  -7  -3   5 1408.28   69.90   1
  -6  -3   5 2067.79  119.73   4
   6  -3  -5 2214.79  164.54   3
  -6  -3   5 2254.71  104.50   1
   5  -3  -5  774.11   40.85   2
  -5  -3   5  741.29   40.23   4
   5   3  -5  627.65   39.85   2
   5  -3  -5  694.22   38.87   4
   5  -3  -5  695.73   59.22   3
  -5  -3   5  724.31   34.89   1
   4  -3  -5  339.11   19.94   2
   4  -3  -5  275.25   16.70   4
   4   3  -5  309.03   19.84   2
   4  -3  -5  305.33   27.94   3
  -4  -3   5  312.10   18.97   4
   3  -3  -5   96.36   11.83   2
   3  -3  -5   80.73   15.84   3
  -3  -3   5   86.02    9.96   4
   3   3  -5   66.97   11.69   2
   3  -3  -5   82.51    5.85   4
  -2  -3   5  103.82   11.65   4
   2  -3  -5  102.73   20.04   3
   2   3  -5   91.55   13.75   2
   2  -3  -5  110.59    9.71   4
   2  -3  -5  136.50   12.38   2
   1  -3  -5  319.38   28.29   3
   1  -3  -5  327.14   18.89   4
   1  -3  -5  315.30   21.84   2
  -1  -3   5  288.19   18.90   4
   1   3  -5  297.79   20.75   2
   0  -3  -5  417.01   25.49   4
   0  -3   5  435.19   24.58   4
   0  -3  -5  422.59   21.85   1
   0  -3  -5  409.73   33.72   3
   0  -3  -5  427.42   27.70   2
  -1  -3  -5 1438.13   68.09   1
  -1  -3  -5 1345.82   79.39   2
  -1  -3  -5 1438.65  106.05   3
  -2  -3  -5  475.39   38.03   3
  -2   3  -5  495.96   23.80   1
  -2  -3  -5  469.72   30.75   2
  -2  -3  -5  477.77   24.85   1
  -3  -3  -5    6.19   11.03   2
  -3  -3  -5    2.75   11.68   3
  -3   3  -5    5.23    5.40   1
  -3  -3  -5   10.12    8.34   1
  -4  -3  -5  964.90   59.40   2
  -4   3  -5 1036.93   59.60   2
  -4  -3  -5 1030.52   50.86   1
   4  -3   5 1066.13   77.03   3
  -4   3  -5 1041.66   49.77   1
  -5   3  -5  504.06   33.31   2
  -5  -3  -5  479.58   34.70   2
  -5   3  -5  484.61   24.05   1
  -5  -3  -5  540.24   26.63   1
   5  -3   5  439.41   36.09   3
  -6  -3  -5  257.21   31.68   2
  -6   3  -5  272.86   27.79   2
  -6  -3  -5  269.04   19.43   1
  -6   3  -5  288.98   15.68   1
  -7  -3  -5  881.26   57.39   2
  -7  -3  -5  880.99   45.76   1
  -7   3  -5  911.67   55.04   2
  -7   3  -5  900.94   44.05   1
  -8   3  -5   52.17   10.35   1
  -8  -3  -5  102.06   16.97   1
  -8   3  -5   79.43   26.47   2
  -8  -3  -5   44.67   33.65   2
  -9  -3  -5   -1.82    5.59   2
  -9  -3  -5   18.32   13.63   1
  -9   3  -5   11.95   10.79   1
  -9   3  -5   -6.08   37.99   2
 -10   3  -5  178.30   14.99   1
 -10   3  -5  150.97   29.32   2
 -10  -3  -5  174.53   29.01   2
 -10  -3  -5  192.84   17.74   1
 -11   3  -5  239.00   17.06   1
 -11  -3  -5  195.53   20.65   1
 -11   3  -5  241.31   30.49   2
 -12  -3  -5  303.97   23.92   1
 -12   3  -5  344.62   34.18   2
 -12   3  -5  336.16   20.97   1
 -13   3  -5  162.63   18.62   1
 -13  -3  -5  133.20   22.03   1
 -13   3  -5  160.46   31.51   2
 -14  -3  -5   73.47   19.04   1
 -14   3  -5   70.34   19.37   1
 -15  -3  -5    3.57   29.15   1
 -19   4   5    7.48   23.05   1
 -18   4   5   19.45   18.24   1
 -18  -4   5   45.16   22.39   1
 -17   4   5   66.78   19.72   1
 -17  -4   5   73.74   22.36   1
 -16   4   5   -2.54    6.85   1
 -16  -4   5   -9.98   24.65   1
  16  -4  -5   37.69   30.47   3
  15  -4  -5  191.41   32.38   3
 -15  -4   5  137.57   19.32   1
 -15   4   5  131.04   18.33   1
 -14   4   5   22.08   16.41   1
  14  -4  -5   95.24   28.67   3
 -14  -4   5   12.79   28.50   1
 -13   4   5  241.35   18.37   1
 -13  -4   5  239.20   19.97   1
  13  -4  -5  248.23   37.90   3
 -12  -4   5   10.59   13.46   1
 -12  -4   5   42.00   21.93   4
 -12   4   5   11.52   12.61   1
 -11   4   5   43.26   12.62   1
 -11  -4   5   45.42   15.48   1
 -11  -4   5   53.08   21.78   4
  10  -4  -5  333.62   56.44   3
 -10   4   5  491.13   26.11   1
 -10  -4   5  446.82   28.07   1
 -10  -4   5  532.33   37.93   4
  -9  -4   5  644.14   33.43   1
  -9   4   5  676.46   32.49   1
   9  -4  -5  562.42   58.19   3
  -9  -4   5  576.55   44.20   4
  -8  -4   5  395.49   23.13   1
   8  -4  -5  438.63   38.95   3
  -8  -4   5  392.40   33.68   4
   7  -4  -5   71.73   18.53   3
  -7  -4   5   25.97   12.13   1
  -7  -4   5   47.59   14.36   4
   6   4  -5   34.44    5.81   2
  -6  -4   5   51.01   14.21   4
  -6  -4   5   55.72    9.85   1
   6  -4  -5   59.51   18.20   3
   5  -4  -5    0.60   82.94   4
  -5  -4   5    5.36    5.39   1
   5   4  -5    1.74    2.14   2
   5  -4  -5    9.50   14.54   3
   4  -4  -5  512.86   27.35   4
   4  -4  -5  489.18   41.01   3
   4   4  -5  437.30   28.89   2
  -4  -4   5  491.60   28.47   4
   4  -4  -5  524.64   29.82   2
   3  -4  -5 6161.85  327.28   4
   3  -4  -5 6043.50  326.04   2
   3  -4  -5 5768.33  437.83   3
  -3  -4   5 5584.02  320.28   4
   2  -4  -5   14.23   10.15   2
   2  -4  -5   -9.43   13.08   3
  -2  -4   5    1.56    5.26   4
   2  -4  -5   19.24    6.53   4
   1  -4  -5 1531.94   81.87   4
   1  -4  -5 1438.71   83.67   2
   1  -4  -5 1461.00  112.34   3
  -1  -4   5 1513.40   82.11   4
   0  -4  -5   68.08    9.95   1
   0  -4   5   62.50   10.46   4
   0  -4  -5   47.49   16.79   3
   0  -4  -5   78.80   15.82   4
   0  -4  -5   70.40   13.91   2
  -1  -4  -5  117.08   15.12   4
  -1  -4  -5   69.20   20.35   2
  -1  -4  -5   78.11   17.97   3
  -1  -4  -5  101.88   11.00   1
  -2  -4  -5  691.42   41.17   4
  -2  -4  -5  695.77   34.84   1
  -2  -4  -5  705.19   53.97   3
  -2  -4  -5  672.77   41.80   2
  -3  -4  -5  280.91   26.53   3
  -3   4  -5  287.25   14.71   1
  -3  -4  -5  275.89   17.07   1
  -3  -4  -5  274.83   24.22   2
  -3  -4  -5  295.88   24.12   4
   3  -4   5  296.98   23.40   3
  -4  -4  -5  572.67   29.91   1
  -4  -4  -5  535.25   45.06   3
  -4  -4  -5  617.33   37.29   2
  -4   4  -5  560.18   28.24   1
   4  -4   5  605.78   43.94   3
  -5   4  -5  306.07   16.44   1
  -5  -4  -5  306.38   20.91   1
  -5  -4  -5  325.13   28.26   2
   5  -4   5  327.44   25.07   3
   6  -4   5   10.68    8.35   3
  -6  -4  -5    9.45   17.04   1
  -6   4  -5   15.97    8.38   1
  -6  -4  -5   62.59   20.38   2
  -7  -4  -5 1034.87   54.10   1
  -7  -4  -5 1107.16   63.67   2
  -7   4  -5 1067.66   52.07   1
  -7   4  -5 1061.89   64.75   2
  -8  -4  -5   89.98   16.95   1
  -8   4  -5   59.85   26.52   2
  -8  -4  -5  144.72   21.24   2
  -8   4  -5   86.66    9.72   1
  -9   4  -5  592.66   43.57   2
  -9  -4  -5  650.79   39.67   2
  -9  -4  -5  555.65   33.69   1
  -9   4  -5  637.14   31.59   1
 -10  -4  -5  127.38   18.68   1
 -10   4  -5  123.71   29.52   2
 -10   4  -5  129.36   13.84   1
 -11   4  -5  474.81   38.98   2
 -11  -4  -5  469.25   29.51   1
 -11   4  -5  511.43   27.20   1
 -12   4  -5   88.07   15.65   1
 -12   4  -5  107.17   30.81   2
 -12  -4  -5   58.61   20.64   1
 -13  -4  -5    7.67  235.63   1
 -13   4  -5   35.55   32.94   2
 -14   4  -5  156.49   35.68   2
 -14  -4  -5  146.66   24.07   1
 -15  -4  -5   65.53   20.80   1
 -17   5   5   22.21   18.55   1
 -17  -5   5   23.87   25.21   1
 -16   5   5  112.68   20.15   1
 -16  -5   5  110.81   22.08   1
 -15  -5   5   17.95   17.22   1
  15  -5  -5   27.94   27.25   3
 -15   5   5   -3.27    8.09   1
 -14   5   5    7.22   15.75   1
  14  -5  -5   35.28   27.74   3
 -14  -5   5   11.10   20.24   1
 -13   5   5   23.05   15.17   1
 -13  -5   5   85.59   26.98   4
 -13  -5   5   17.09   19.00   1
  13  -5  -5   57.19   25.71   3
 -12  -5   5  311.38   33.29   4
  12  -5  -5  260.29   34.72   3
 -12   5   5  285.65   19.44   1
 -12  -5   5  283.15   21.33   1
 -11  -5   5   -2.18   12.76   1
  11  -5  -5   48.22   21.76   3
 -11  -5   5   28.19   28.05   4
 -11   5   5   -6.83   10.31   1
 -10  -5   5  360.64   23.07   1
 -10   5   5  386.03   22.07   1
  10  -5  -5  384.37   38.21   3
 -10  -5   5  355.93   35.77   4
  -9   5   5   13.18   10.50   1
  -9  -5   5   18.23   12.33   1
   9  -5  -5   39.34   20.54   3
  -8  -5   5  140.70   15.37   1
   8  -5  -5  143.61   24.80   3
  -8  -5   5   92.84   32.09   4
  -7  -5   5   43.30   15.10   4
   7  -5  -5   46.47   23.87   3
  -7  -5   5   31.91   11.47   1
   7  -5  -5   45.72    8.78   4
  -6  -5   5  239.31   14.32   1
  -6  -5   5  243.99   19.75   4
   6  -5  -5  220.11   14.60   4
   6  -5  -5  225.53   28.37   3
   6   5  -5  189.99   14.40   2
   5  -5  -5  199.74   13.05   4
  -5  -5   5  183.80   18.41   4
   5  -5  -5  191.11   27.35   3
  -5  -5   5  202.17   12.31   1
   4  -5  -5    9.09    5.16   4
   4  -5  -5   -3.15   10.32   3
  -4  -5   5    7.58    9.72   4
  -4  -5   5    7.67    6.85   1
  -3  -5   5   63.94   11.43   4
   3  -5  -5   49.70   21.94   3
   3  -5  -5   60.44   14.04   2
   3  -5  -5   43.44   10.18   4
  -3  -5   5   68.56    6.99   1
   2  -5  -5  186.28   13.76   4
   2  -5  -5  187.94   23.61   3
  -2  -5   5  217.29   16.11   4
   2  -5  -5  174.81   18.02   2
   1  -5  -5   37.06   10.00   4
   1  -5  -5   26.91   12.58   2
   1  -5  -5   43.31   17.93   3
  -1  -5   5   29.95   14.92   4
   0  -5   5 1281.62   67.37   4
   0  -5  -5 1180.05   58.64   1
   0  -5  -5 1217.55   92.27   3
   0  -5  -5 1145.75   68.76   2
   0  -5  -5 1220.58   67.42   4
  -1  -5  -5  189.51   23.10   3
   1  -5   5  215.38   15.70   4
  -1  -5  -5  190.67   17.61   2
  -1  -5  -5  164.44   19.90   4
  -1  -5  -5  190.77   13.44   1
   2  -5   5   54.83   12.35   3
  -2  -5  -5   57.08   16.57   4
   2  -5   5   44.23   11.74   4
  -2  -5  -5   45.33   18.17   2
  -2  -5  -5   42.32   18.93   3
  -2  -5  -5   38.06   10.60   1
   3  -5   5   31.57   11.13   3
  -3  -5  -5   12.38   22.49   3
  -3  -5  -5   29.62   11.85   1
  -3   5  -5   24.85    5.90   1
  -3  -5  -5   45.83   16.31   4
  -4  -5  -5   26.47   11.90   1
  -4   5  -5   21.37    5.76   1
   4  -5   5   20.45   11.03   3
  -4  -5  -5   42.95   17.32   4
  -4  -5  -5   46.17   17.68   3
  -4  -5  -5   17.42   19.78   2
  -5   5  -5  404.89   20.38   1
   5  -5   5  404.98   32.00   3
  -5  -5  -5  391.94   24.86   1
  -5  -5  -5  425.79   33.47   2
  -6  -5  -5  389.08   32.28   2
  -6   5  -5  339.06   18.04   1
   6  -5   5  329.42   27.76   3
  -6  -5  -5  417.47   24.18   1
  -7   5  -5   55.85    8.53   1
  -7  -5  -5   58.45   16.37   1
  -7  -5  -5   76.50   23.01   2
  -8   5  -5   -0.50    1.80   1
  -8  -5  -5   10.02   13.20   1
  -8  -5  -5   -0.50    6.49   2
  -9   5  -5    0.32   16.65   1
  -9  -5  -5   20.41   16.51   1
  -9  -5  -5    8.31   17.17   2
 -10  -5  -5  108.47   19.86   1
 -10   5  -5  112.01   13.02   1
 -10   5  -5   92.43   31.39   2
 -11  -5  -5   -2.72    7.59   1
 -11   5  -5   -3.75   10.39   2
 -12   5  -5  263.81   35.76   2
 -12  -5  -5  199.89   24.59   1
 -13  -5  -5   16.56   16.19   1
 -13   5  -5   28.91   27.56   2
 -14  -5  -5   31.58   19.90   1
 -14   5  -5   54.15   36.44   2
 -17  -6   5   10.09   14.59   1
 -16  -6   5  146.82   21.58   1
  15  -6  -5   18.86   35.18   3
 -15  -6   5    1.50    4.43   1
 -14  -6   5  301.64   24.95   1
 -14  -6   5  421.70   37.92   4
  14  -6  -5  373.09   41.58   3
 -14   6   5  372.62   23.66   1
 -13   6   5  120.84   16.34   1
  13  -6  -5  104.36   32.25   3
 -13  -6   5  106.30   17.73   1
 -13  -6   5  186.99   29.79   4
 -12  -6   5   -0.59    5.12   1
 -12   6   5    5.52   15.55   1
 -12  -6   5   36.08   26.75   4
 -11   6   5    4.96   54.92   1
 -11  -6   5    3.60   30.70   4
 -11  -6   5    4.44   32.80   1
  11  -6  -5   -7.40   45.31   3
  10  -6  -5   15.17   27.19   3
 -10  -6   5   18.45   29.67   4
 -10   6   5   12.52   12.12   1
 -10  -6   5   13.25   12.67   1
  -9  -6   5  194.43   34.78   4
  -9  -6   5  241.48   18.06   1
  -9   6   5  240.71   17.13   1
   9  -6  -5  254.23   33.36   3
  -8  -6   5  358.19   26.91   4
  -8  -6   5  323.29   20.00   1
   8  -6  -5  277.80   36.01   3
   8  -6  -5  322.80   20.65   4
   7  -6  -5   34.89   10.68   4
   7  -6  -5    6.09  163.10   3
  -7  -6   5   46.72   18.79   4
  -7  -6   5   31.05   11.47   1
   6  -6  -5   96.71   28.80   3
   6  -6  -5  157.97   13.19   4
  -6  -6   5  156.79   13.18   1
  -6  -6   5  140.30   20.54   4
  -5  -6   5    0.35    9.12   1
  -5  -6   5   -6.07    9.16   4
   5  -6  -5    8.92    6.88   4
   4  -6  -5  749.44   39.45   4
  -4  -6   5  680.78   40.47   4
  -4  -6   5  673.73   34.46   1
   4  -6  -5  709.34   56.87   3
   3  -6  -5   -2.05    8.48   2
  -3  -6   5    4.16   49.12   4
   3  -6  -5    1.56   53.19   4
  -3  -6   5    1.42   89.67   1
   3  -6  -5    7.53   16.34   3
  -2  -6   5 1395.93   70.78   1
   2  -6  -5 1446.35   81.72   4
   2  -6  -5 1472.26   84.10   2
   2  -6  -5 1575.64  113.27   3
  -2  -6   5 1547.24   82.59   4
   1  -6  -5   20.89   21.29   3
   1  -6  -5   34.54    9.66   4
  -1  -6   5   11.35   14.20   4
   1  -6  -5   22.80   20.29   2
   0  -6  -5   27.59   17.96   4
   0  -6  -5   45.99   21.33   3
   0  -6   5   43.97   13.50   4
   0  -6  -5   60.57   16.49   2
   0  -6  -5   52.89    9.99   1
   1  -6   5   62.43   11.22   4
  -1  -6  -5   44.47   11.05   1
  -1  -6  -5   58.98   22.67   4
  -1  -6  -5   39.81   16.28   2
   1  -6   5   73.90   16.72   3
  -1  -6  -5   62.63   23.56   3
  -2  -6  -5  681.03   42.74   2
   2  -6   5  695.60   54.75   3
   2  -6   5  726.48   40.79   4
  -2  -6  -5  729.98   35.87   1
  -2  -6  -5  712.86   56.49   3
  -2  -6  -5  700.14   44.23   4
   3  -6   5   69.90   15.25   4
   3  -6   5   49.17   14.35   3
  -3  -6  -5   45.79   23.78   3
  -3  -6  -5   56.47   12.41   1
  -3  -6  -5   79.35   23.75   4
  -3  -6  -5   67.02   17.65   2
  -4  -6  -5  701.21   42.32   2
  -4  -6  -5  655.07   35.03   1
  -4  -6  -5  676.55   44.71   4
  -4   6  -5  696.98   32.94   1
   4  -6   5  675.92   52.19   3
  -4  -6  -5  653.41   54.40   3
  -5  -6  -5  420.34   35.63   2
  -5  -6  -5  473.07   35.84   4
  -5   6  -5  417.30   21.19   1
  -5  -6  -5  424.47   25.90   1
   5  -6   5  420.39   33.79   3
   6  -6   5   32.32   11.05   3
  -6  -6  -5   39.78   16.56   1
  -6  -6  -5   -6.49    8.65   2
  -6   6  -5   29.23    6.94   1
  -7  -6  -5   29.01   13.88   1
  -7  -6  -5    4.63   97.84   2
  -8  -6  -5  525.46   28.39   1
  -8  -6  -5  406.88   34.22   2
  -9  -6  -5   15.55   14.87   1
 -10   6  -5  177.12   33.55   2
 -10  -6  -5  253.00   24.06   1
 -11  -6  -5   29.06   20.87   1
 -12  -6  -5   13.53   24.25   1
 -12   6  -5   -5.96   21.45   2
 -13  -6  -5   -4.13   11.83   1
 -14  -6  -5   90.90   28.67   1
 -14   6  -5   96.39   33.43   2
 -17  -7   5   11.18   18.24   1
 -16  -7   5   50.31   22.02   1
 -15  -7   5   52.99   20.15   1
  15  -7  -5   16.71   43.79   3
 -14  -7   5  128.35   32.12   4
  14  -7  -5   72.46   34.69   3
 -14  -7   5   48.30   16.74   1
 -13  -7   5    4.92   13.57   1
 -13  -7   5   46.94   29.39   4
  13  -7  -5   36.32   27.58   3
 -12  -7   5  308.96   22.79   1
  12  -7  -5  336.10   38.11   3
 -12  -7   5  427.81   36.75   4
 -12   7   5  395.38   21.97   1
  11  -7  -5    6.87  107.19   3
 -11   7   5    8.01   13.01   1
 -11  -7   5    1.72   13.03   4
 -11  -7   5   -1.35    6.90   1
 -10   7   5  140.74   13.23   1
 -10  -7   5  132.01   14.17   1
 -10  -7   5  156.51   33.85   4
  10  -7  -5  100.22   12.28   4
  10  -7  -5  121.64   27.42   3
  -9  -7   5   26.53   12.53   1
   9  -7  -5   26.34   10.86   4
  -9   7   5   22.37   10.56   1
   9  -7  -5    6.34   44.80   3
  -8  -7   5  421.92   29.64   4
   8  -7  -5  341.19   23.36   4
  -8  -7   5  407.81   21.25   1
  -8   7   5  385.75   20.68   1
   8  -7  -5  333.57   38.81   3
  -7  -7   5   28.44   11.37   1
   7  -7  -5   16.82   11.36   4
  -7  -7   5   28.83   18.63   4
   6  -7  -5 1420.84  112.96   3
  -6  -7   5 1502.79   71.22   1
   6  -7  -5 1555.43   81.44   4
  -6  -7   5 1397.75   82.56   4
  -5  -7   5   30.87    9.22   1
   5  -7  -5   36.35   10.47   4
   5  -7  -5   39.40   19.99   3
  -5  -7   5   17.76   34.12   4
   4  -7  -5  983.18   55.72   4
   4  -7  -5 1017.26   77.97   3
  -4  -7   5  983.70   48.49   1
  -4  -7   5 1024.37   56.79   4
  -3  -7   5   -1.60    3.13   1
   3  -7  -5   -5.75   11.58   4
   3  -7  -5   20.76   24.91   3
   2  -7  -5  215.32   27.62   3
  -2  -7   5  211.74   18.74   4
   2  -7  -5  182.47   20.31   2
   2  -7  -5  201.77   16.67   4
  -2  -7   5  184.62   10.56   1
   1  -7  -5   89.70   13.98   4
  -1  -7   5   61.39    5.02   1
  -1  -7   5   69.69   17.18   4
   1  -7  -5   81.40   24.54   3
   1  -7  -5   74.59   17.64   2
   0  -7  -5  873.92   51.79   4
   0  -7  -5  961.47   45.05   1
   0  -7  -5  961.82   71.97   3
   0  -7   5  915.97   52.12   4
   0  -7  -5  862.96   53.26   2
   1  -7   5   39.48   17.67   3
   1  -7   5   24.36   14.48   4
  -1  -7  -5   35.86    9.93   1
  -1  -7  -5   23.56   34.04   3
  -1  -7  -5   20.16   27.86   4
  -1  -7  -5   22.94   21.61   2
  -2  -7  -5  303.11   27.04   2
  -2  -7  -5  343.01   19.07   1
   2  -7   5  333.35   23.24   4
  -2  -7  -5  313.92   34.09   3
   2  -7   5  332.06   29.13   3
  -2  -7  -5  322.46   30.77   4
   3  -7   5   21.77   16.27   4
  -3  -7  -5   25.01   26.75   4
  -3  -7  -5   -0.95    5.59   2
   3  -7   5   14.74   11.22   3
  -3  -7  -5   11.79   13.14   1
  -3  -7  -5   13.45   19.03   3
  -4  -7  -5 1063.71   63.34   4
  -4  -7  -5 1133.63   62.09   2
   4  -7   5 1075.51   60.07   4
  -4  -7  -5 1029.08   52.78   1
   4  -7   5 1023.96   80.41   3
  -4  -7  -5 1025.62   82.46   3
  -5  -7  -5    5.92   24.82   1
  -5  -7  -5   15.94   15.74   2
   5  -7   5    5.53   15.09   3
  -5  -7  -5   37.82   20.73   4
  -6  -7  -5  664.67   40.49   2
  -6  -7  -5  684.92   35.69   1
  -6  -7  -5  624.22   45.27   4
  -7  -7  -5   49.46   17.02   2
  -7  -7  -5   34.94   17.37   1
  -8  -7  -5  680.44   34.80   1
  -8  -7  -5  550.27   37.38   2
  -9  -7  -5   -4.81   13.29   1
 -10  -7  -5  391.23   28.52   1
 -11  -7  -5   20.59   18.44   1
 -12  -7  -5  157.27   26.51   1
 -12   7  -5  147.95   36.91   2
 -13  -7  -5    5.55   85.43   1
 -14   7  -5   63.56   35.54   2
 -16  -8   5  142.47   21.41   1
 -15  -8   5   14.45   15.62   1
 -15  -8   5   44.76   29.30   4
 -14  -8   5  449.99   36.24   4
 -14  -8   5  303.67   23.22   1
  14  -8  -5  273.65   41.13   3
 -13  -8   5   63.16   27.92   4
 -13  -8   5   36.52   16.82   1
  13  -8  -5    4.27   14.24   3
 -12  -8   5  253.32   33.91   4
  12  -8  -5  157.08   31.31   3
 -12  -8   5  172.01   16.96   1
 -11  -8   5    1.39   32.08   4
 -11  -8   5    0.32    4.07   1
 -10  -8   5   -3.71   71.70   1
 -10  -8   5   -8.45   15.19   4
  10  -8  -5   -2.90    7.97   3
  -9  -8   5   11.31   10.05   1
   9  -8  -5    5.52    8.27   4
   9  -8  -5   -7.17   15.03   3
  -8  -8   5   70.45   19.18   4
   8  -8  -5   61.08   11.55   4
  -8  -8   5   41.65   10.91   1
   8  -8  -5   22.68   21.79   3
  -8   8   5   41.67   11.52   1
  -7  -8   5  128.42   11.90   1
   7  -8  -5  119.02   13.76   4
  -7  -8   5  171.48   22.26   4
   7  -8  -5  139.84   24.28   3
  -6  -8   5   24.83   10.44   1
  -6  -8   5   11.39   15.27   4
   6  -8  -5   43.01   21.65   3
   6  -8  -5   26.59   11.43   4
  -5  -8   5  126.93   22.96   4
   5  -8  -5   99.75   25.80   3
   5  -8  -5  128.60   13.33   4
  -5  -8   5  136.05   10.43   1
  -4  -8   5  768.46   39.04   1
  -4  -8   5  831.16   46.57   4
   4  -8  -5  818.97   45.28   4
   4  -8  -5  787.41   64.48   3
  -3  -8   5    3.66    6.32   1
  -3  -8   5    8.58   18.87   4
   3  -8  -5   11.65   35.33   3
   3  -8  -5   -2.56    5.03   4
  -2  -8   5 1049.78   59.71   4
   2  -8  -5 1174.31   82.75   3
   2  -8  -5 1058.98   58.96   4
  -2  -8   5  953.54   50.23   1
   1  -8  -5   24.13   13.59   4
   0  -8  -5  329.74   27.05   2
   0  -8  -5  383.28   24.68   4
   0  -8   5  365.32   25.56   4
   0  -8  -5  366.59   36.98   3
  -1  -8  -5   -1.84   45.63   2
  -1  -8  -5   18.65   27.04   3
  -1  -8  -5    2.29   11.00   1
   1  -8   5    9.41   19.28   4
   1  -8   5   22.19   20.66   3
  -2  -8  -5  164.32   23.46   2
  -2  -8  -5  163.44   29.83   3
  -2  -8  -5  195.05   14.34   1
   2  -8   5  170.70   21.98   3
  -2  -8  -5  140.26   30.24   4
   2  -8   5  147.52   18.11   4
  -3  -8  -5   51.00   30.97   4
  -3  -8  -5   55.44   13.03   1
  -3  -8  -5   58.43   21.39   2
  -3  -8  -5   68.28   26.65   3
   3  -8   5   65.57   17.23   3
   3  -8   5   63.30   15.36   4
   4  -8   5  331.95   22.16   4
  -4  -8  -5  254.25   30.52   4
   4  -8   5  244.92   24.95   3
  -4  -8  -5  299.43   31.25   3
  -4  -8  -5  251.72   18.08   1
  -4  -8  -5  301.10   25.08   2
  -5  -8  -5   60.34   15.44   1
  -5  -8  -5   67.04   25.45   3
   5  -8   5   53.39   13.97   3
   5  -8   5   71.11   16.32   4
  -5  -8  -5   60.21   17.32   2
  -5  -8  -5   83.92   24.22   4
  -6  -8  -5  137.55   19.52   2
   6  -8   5  125.65   17.87   4
  -6  -8  -5  156.28   29.44   4
  -6  -8  -5  122.03   16.43   1
  -7  -8  -5   64.75   17.30   2
  -7  -8  -5  103.45   28.94   4
  -7  -8  -5   86.32   17.75   1
  -8  -8  -5  551.44   32.08   1
  -9  -8  -5    6.75   11.39   1
 -10  -8  -5  500.37   32.24   1
 -11  -8  -5    1.72   23.99   1
 -12  -8  -5   25.57   24.87   1
 -12   8  -5   -1.42    4.76   2
 -13  -8  -5   -7.32   43.89   1
 -14   8  -5   24.62   47.75   2
 -16  -9   5   64.28   21.61   1
 -15  -9   5   32.67   33.71   4
  15  -9  -5   27.29   28.68   3
 -15  -9   5    7.36   16.90   1
  14  -9  -5   22.75   22.36   3
 -14  -9   5    9.19   14.16   1
 -14  -9   5   31.91   23.38   4
 -13  -9   5   31.57   15.93   1
 -13  -9   5   79.44   32.50   4
  13  -9  -5   56.56   25.42   3
 -12  -9   5  279.83   19.54   1
  12  -9  -5  268.88   30.53   3
 -12  -9   5  337.03   33.90   4
  11  -9  -5   -2.97   24.59   3
 -11  -9   5    1.68    5.21   1
 -11  -9   5    4.52   20.47   4
 -10  -9   5  247.51   17.79   1
 -10  -9   5  273.12   32.71   4
  10  -9  -5  286.90   28.80   3
   9  -9  -5   15.95   18.91   3
  -9  -9   5    9.24   10.57   1
   8  -9  -5    5.00   20.27   3
  -8  -9   5    2.63    5.35   1
   8  -9  -5   -1.55   11.75   4
  -8  -9   5    4.57   11.48   4
   7  -9  -5  112.25   13.11   4
  -7  -9   5  103.92   10.99   1
   7  -9  -5  135.66   22.88   3
  -7  -9   5  157.61   19.68   4
   6  -9  -5  415.55   37.30   3
  -6  -9   5  375.61   21.27   1
  -6  -9   5  428.38   30.05   4
   6  -9  -5  428.78   25.19   4
   5  -9  -5   96.43   13.41   4
  -5  -9   5  104.47    9.44   1
  -5  -9   5   75.45   20.47   4
   5  -9  -5  102.92   23.94   3
   4  -9  -5  520.06   42.78   3
   4  -9  -5  432.11   26.95   4
  -4  -9   5  432.29   30.44   4
  -4  -9   5  423.73   22.45   1
   3  -9  -5   10.55   22.73   3
  -3  -9   5   13.53   20.48   4
   3  -9  -5    3.14   34.65   4
   2  -9  -5   13.01   16.93   4
   2  -9  -5    8.59   19.24   3
  -2  -9   5   25.87   18.03   4
  -1  -9   5   47.02   18.36   4
   1  -9  -5   60.21   31.16   3
   1  -9  -5   53.85   15.35   4
   0  -9  -5  540.98   47.88   3
   0  -9   5  489.22   32.72   4
   0  -9  -5  523.91   32.20   4
   1  -9   5   82.86   19.84   3
  -1  -9  -5   74.14   10.64   1
  -1  -9  -5   69.89   26.33   4
   1  -9   5   61.52   15.51   4
  -1  -9  -5   67.55   31.08   3
  -1  -9  -5   46.55   22.35   2
   2  -9   5  192.47   21.29   3
   2  -9   5  139.57   18.93   4
  -2  -9  -5  204.77   23.05   2
  -2  -9  -5  156.45   26.73   4
  -2  -9  -5  145.01   27.58   3
  -2  -9  -5  194.27   13.46   1
  -3  -9  -5   23.87   27.54   4
  -3  -9  -5    9.43   12.20   1
   3  -9   5   30.63   16.63   4
   3  -9   5   11.12   15.21   3
  -3  -9  -5   10.03   20.81   3
  -3  -9  -5    5.04   53.88   2
   4  -9   5   13.96   14.22   4
   4  -9   5   16.31   12.05   3
  -4  -9  -5   38.27   22.73   3
  -4  -9  -5   28.01   32.02   4
  -5  -9  -5  138.51   28.70   4
  -5  -9  -5  103.63   21.33   2
  -5  -9  -5  106.12   14.48   1
   5  -9   5  127.67   17.48   4
  -5  -9  -5  151.25   26.49   3
   5  -9   5   99.62   17.03   3
   6  -9   5  617.10   37.09   4
  -6  -9  -5  568.69   38.47   2
  -6  -9  -5  602.58   33.02   1
  -6  -9  -5  666.98   43.80   4
  -7  -9  -5  179.71   19.66   1
  -7  -9  -5  228.93   29.39   4
   7  -9   5  190.53   20.03   4
   8  -9   5   11.39   14.35   4
  -8  -9  -5   73.93   29.14   4
  -8  -9  -5   -3.67   22.60   1
  -9  -9  -5   73.71   22.15   1
   9  -9   5   83.15   16.96   4
 -10  -9  -5    1.18    7.54   1
 -11  -9  -5   -8.73   23.88   1
 -12   9  -5  107.23   43.15   2
 -12  -9  -5  144.84   26.13   1
 -13   9  -5   26.77   55.11   2
 -15 -10   5  132.40   35.05   4
 -15 -10   5   61.42   19.51   1
 -14 -10   5   95.44   17.08   1
  14 -10  -5   65.69   28.85   3
 -14 -10   5  199.72   37.00   4
 -13 -10   5   52.83   29.61   4
 -13 -10   5   22.26   14.74   1
  13 -10  -5   16.95   22.57   3
  12 -10  -5   19.10   25.51   3
 -12 -10   5    7.64   11.63   1
 -12 -10   5   14.42   34.36   4
  11 -10  -5   13.02   22.53   3
 -11 -10   5   -6.59    9.26   1
 -10 -10   5   45.09   12.16   1
 -10 -10   5   37.88   36.34   4
  10 -10  -5   46.41   22.71   3
  -9 -10   5   18.39   22.25   4
  -9 -10   5   12.00    9.31   1
   9 -10  -5   12.82   25.48   3
  -8 -10   5  240.72   22.86   4
  -8 -10   5  206.50   14.40   1
   8 -10  -5  180.68   25.51   3
  -7 -10   5   25.49   15.01   4
  -7 -10   5   -2.59    7.81   1
   7 -10  -5    3.14   14.66   4
   7 -10  -5    4.56   25.17   3
   6 -10  -5   51.22   13.36   4
   6 -10  -5   37.47   22.44   3
  -6 -10   5   55.45   22.83   4
   5 -10  -5  148.29   15.59   4
   5 -10  -5  192.67   25.84   3
  -5 -10   5  154.19   22.98   4
  -4 -10   5  294.04   26.17   4
   4 -10  -5  274.75   20.59   4
   4 -10  -5  312.01   32.59   3
   3 -10  -5  158.17   27.21   3
  -3 -10   5  147.89   18.61   4
   3 -10  -5  132.76   16.83   4
   2 -10  -5  162.58   17.07   4
  -2 -10   5  156.57   17.38   4
   2 -10  -5  169.80   28.83   3
   1 -10  -5  162.55   30.09   3
  -1 -10   5  176.98   19.06   4
   1 -10  -5  172.84   17.40   4
   0 -10  -5   -4.92   14.96   3
   0 -10   5   -5.38   16.93   4
   0 -10  -5   23.28   12.95   4
   1 -10   5  196.24   19.38   4
   1 -10   5  230.65   24.41   3
  -1 -10  -5  235.41   29.88   3
  -1 -10  -5  209.06   24.05   4
   2 -10   5  362.97   33.70   3
  -2 -10  -5  417.70   39.20   3
  -2 -10  -5  436.34   31.59   4
   2 -10   5  368.05   26.34   4
  -2 -10  -5  422.16   21.92   1
  -3 -10  -5  254.20   31.10   3
   3 -10   5  222.99   24.50   3
   3 -10   5  238.50   20.23   4
  -3 -10  -5  209.48   30.61   4
  -3 -10  -5  266.67   23.83   2
  -3 -10  -5  227.35   16.19   1
  -4 -10  -5  117.80   14.19   1
   4 -10   5   98.65   18.13   3
  -4 -10  -5  146.55   27.18   4
  -4 -10  -5  125.51   20.61   2
  -4 -10  -5  101.03   27.51   3
   4 -10   5  128.25   17.24   4
   5 -10   5   -4.45   15.26   4
   5 -10   5    6.91   12.75   3
  -5 -10  -5   39.05   25.47   4
  -5 -10  -5    1.72   17.09   1
  -5 -10  -5   13.53   21.77   3
  -5 -10  -5   -0.57    2.23   2
  -6 -10  -5    5.84   13.67   1
  -6 -10  -5   -3.46    6.31   2
  -6 -10  -5   38.91   24.11   4
   6 -10   5    7.94   16.40   4
  -7 -10  -5  236.35   30.40   4
  -7 -10  -5  199.69   18.64   1
   7 -10   5  195.45   21.02   4
   8 -10   5  174.28   21.35   4
  -8 -10  -5  274.53   34.86   4
  -8 -10  -5  180.20   19.39   1
   9 -10   5  293.45   25.42   4
  -9 -10  -5  255.20   24.33   1
  10 -10   5  350.42   28.26   4
 -10 -10  -5  331.36   27.18   1
  11 -10   5   76.46   22.97   4
 -11 -10  -5   58.26   23.22   1
  12 -10   5   12.05   28.09   4
 -12 -10  -5   -5.07   11.08   1
 -15 -11   5    4.91   30.02   1
 -14 -11   5   13.74   15.08   1
  14 -11  -5   14.62   26.20   3
 -14 -11   5   85.30   34.06   4
  13 -11  -5   40.36   25.14   3
 -13 -11   5   31.60   14.54   1
 -13 -11   5   44.09   41.63   4
  12 -11  -5   70.12   25.16   3
 -12 -11   5   88.88   35.07   4
 -12 -11   5   51.53   14.16   1
  11 -11  -5   41.30   22.52   3
 -11 -11   5    9.40   31.15   4
 -11 -11   5   41.09   12.88   1
  -9 -11   5   32.12   17.33   4
  -8 -11   5   85.16   20.06   4
   8 -11  -5   72.45   23.19   3
   7 -11  -5   72.00   25.54   3
  -7 -11   5  108.10   20.10   4
   6 -11  -5  297.51   30.63   3
   6 -11  -5  265.43   21.11   4
  -6 -11   5  300.29   26.41   4
   5 -11  -5  135.78   25.94   3
   5 -11  -5  107.57   14.70   4
  -5 -11   5  124.06   22.90   4
   4 -11  -5  105.96   26.87   3
   4 -11  -5   55.43   17.35   4
  -4 -11   5   55.58   21.54   4
  -3 -11   5    5.79   13.28   4
   3 -11  -5   -0.72    8.06   3
   3 -11  -5   -4.87   11.42   4
  -2 -11   5   52.13   18.71   4
   2 -11  -5   40.59   31.63   3
   2 -11  -5   43.33   17.57   4
  -1 -11   5   13.73   14.49   4
   1 -11  -5   10.15   13.17   4
   1 -11  -5    9.73   41.55   3
   0 -11  -5   96.03   28.72   3
   0 -11  -5  110.00   16.98   4
   0 -11   5   83.54   18.83   4
   1 -11   5   35.79   20.51   3
  -1 -11  -5   37.09   25.51   3
   1 -11   5   27.29   17.34   4
  -1 -11  -5   37.89   18.79   4
  -2 -11  -5   39.61   26.02   3
  -2 -11  -5   27.52   24.74   4
   2 -11   5   21.95   15.83   4
  -2 -11  -5   23.46   12.68   1
   2 -11   5   61.56   17.36   3
  -3 -11  -5   -6.94   18.17   4
  -3 -11  -5   23.91   28.42   3
  -3 -11  -5   25.86    9.96   1
   3 -11   5   -0.31   17.25   4
   3 -11   5   20.80   12.40   3
  -4 -11  -5  164.48   15.38   1
  -4 -11  -5  155.81   27.95   3
   4 -11   5  118.53   18.68   4
  -4 -11  -5  172.21   27.24   4
   4 -11   5  138.15   20.88   3
  -5 -11  -5  110.27   28.82   4
   5 -11   5   85.88   18.67   3
   5 -11   5   92.65   17.34   4
  -5 -11  -5   99.52   13.90   1
  -6 -11  -5  126.29   27.82   4
  -6 -11  -5  104.24   15.54   1
   6 -11   5  107.03   18.21   4
   7 -11   5   -2.93   13.60   4
  -7 -11  -5    5.68    9.97   1
  -7 -11  -5   79.35   26.25   4
  -8 -11  -5   15.46   17.64   1
   8 -11   5   32.02   17.05   4
  -8 -11  -5   62.91   30.09   4
  -9 -11  -5   47.08   25.80   4
  -9 -11  -5   21.02   14.09   1
   9 -11   5   32.14   24.71   4
  10 -11   5   92.15   24.26   4
 -10 -11  -5   55.80   19.92   1
 -11 -11  -5   69.37   22.62   1
  11 -11   5  105.84   25.02   4
  14 -12  -5   11.19   32.46   3
 -13 -12   5  114.30   35.35   4
  13 -12  -5   75.13   29.18   3
  12 -12  -5   16.09   26.85   3
  11 -12  -5   13.96   17.01   3
  10 -12  -5   29.49   21.17   3
 -10 -12   5   35.50   31.77   4
  -9 -12   5   54.36   22.75   4
   9 -12  -5    9.96   20.29   3
   8 -12  -5   18.58   25.68   3
  -8 -12   5   71.11   20.83   4
  -7 -12   5   75.93   19.41   4
   7 -12  -5   43.68   22.82   3
  -6 -12   5   30.89   20.31   4
   6 -12  -5   30.32   23.49   3
   5 -12  -5   57.07   24.66   3
  -5 -12   5   51.18   22.45   4
   4 -12  -5   10.35   22.35   3
   4 -12  -5   -6.58   10.83   4
   3 -12  -5   57.24   30.22   3
   3 -12  -5   55.98   16.83   4
  -3 -12   5  107.14   17.78   4
   2 -12  -5   -4.96   22.93   3
  -2 -12   5    4.83   15.80   4
   2 -12  -5    3.34   13.41   4
  -1 -12   5  111.19   17.84   4
   1 -12  -5  122.04   31.24   3
   1 -12  -5  106.79   17.36   4
   0 -12   5   19.32   16.41   4
   0 -12  -5   55.19   27.28   3
   0 -12  -5   26.08   14.27   4
   1 -12   5   -6.97   14.50   4
  -1 -12  -5   14.38   25.67   3
  -1 -12  -5    2.97   14.77   4
   2 -12   5   18.73   18.78   3
   2 -12   5   10.47   13.15   4
  -2 -12  -5    9.74   12.77   3
  -3 -12  -5  144.54   27.68   4
  -3 -12  -5  191.02   30.98   3
   3 -12   5  192.89   22.90   3
   3 -12   5  137.44   19.81   4
  -4 -12  -5   29.17   22.18   4
  -4 -12  -5   32.08   27.26   3
   4 -12   5   30.34   17.30   3
   4 -12   5   24.59   18.37   4
  -5 -12  -5    2.94   11.14   4
   5 -12   5   -2.58   12.23   4
   6 -12   5   16.66   17.27   4
  -6 -12  -5   47.98   31.57   4
  -6 -12  -5   32.68   12.83   1
   7 -12   5   27.66   19.34   4
  -7 -12  -5  118.30   29.84   4
  -7 -12  -5   25.32   14.64   1
  -8 -12  -5    7.85   14.58   1
  -8 -12  -5   63.50   30.04   4
   8 -12   5    5.18   12.13   4
  -9 -12  -5  147.61   20.29   1
  -9 -12  -5  262.38   38.29   4
   9 -12   5  159.38   24.78   4
  10 -12   5    3.83   26.70   4
 -10 -12  -5   -0.33    2.03   1
 -11 -12  -5    5.29   16.81   1
  13 -13  -5   10.86   22.16   3
  12 -13  -5   -3.98   24.72   3
  11 -13  -5  145.67   27.76   3
 -11 -13   5  173.30   38.22   4
  10 -13  -5    3.47   19.36   3
 -10 -13   5   -5.70   13.15   4
   9 -13  -5   12.87   23.99   3
  -9 -13   5    4.14   23.86   4
   8 -13  -5    6.34   17.05   3
  -8 -13   5   38.00   21.07   4
   7 -13  -5   76.18   24.28   3
  -7 -13   5  148.81   24.25   4
  -6 -13   5    9.67   18.71   4
   6 -13  -5   -2.16  360.19   3
   5 -13  -5  238.94   33.05   3
  -5 -13   5  269.71   26.71   4
  -4 -13   5    6.19  902.45   4
   4 -13  -5    1.55   35.26   3
   3 -13  -5   -4.90   10.07   4
  -3 -13   5    4.22 1224.99   4
   3 -13  -5   -2.29    8.43   3
   2 -13  -5   19.81   28.74   3
  -2 -13   5   24.50   15.64   4
   2 -13  -5   -2.74   16.17   4
   1 -13  -5  249.70   34.09   3
  -1 -13   5  254.68   22.71   4
   1 -13  -5  242.59   22.26   4
   0 -13   5   24.26   18.51   4
   0 -13  -5   29.88   15.97   4
   0 -13  -5    1.70  164.17   3
  -1 -13  -5  201.97   31.20   3
   1 -13   5  175.55   20.47   4
  -1 -13  -5  215.56   25.43   4
   2 -13   5    9.00   15.44   4
  -2 -13  -5   15.98   21.59   3
  -3 -13  -5    4.65   38.92   4
  -3 -13  -5    2.85   30.61   3
   3 -13   5    8.24   11.40   3
  -4 -13  -5   12.51   32.82   4
  -4 -13  -5   30.68   27.51   3
   4 -13   5   16.28   18.24   4
   4 -13   5   41.11   20.69   3
   5 -13   5  125.25   21.27   4
  -5 -13  -5  143.73   30.06   4
   6 -13   5   -5.05   23.55   4
  -6 -13  -5   44.47   26.00   4
  -7 -13  -5  211.73   31.35   4
   7 -13   5  155.00   22.74   4
   8 -13   5   11.58   60.89   4
  -8 -13  -5  100.44   34.06   4
  -9 -13  -5   60.41   36.57   4
  11 -14  -5   35.88   25.92   3
  10 -14  -5    3.21   14.39   3
 -10 -14   5    7.74   60.80   4
  -9 -14   5  180.04   32.78   4
   9 -14  -5  133.66   28.29   3
  -8 -14   5   43.31   23.24   4
   8 -14  -5    2.49   53.58   3
   7 -14  -5  143.28   29.56   3
  -7 -14   5  205.60   26.05   4
   6 -14  -5   -0.69    5.41   3
  -6 -14   5   17.05   24.70   4
   5 -14  -5   60.76   29.28   3
  -5 -14   5   52.00   25.35   4
   4 -14  -5   -3.47   19.94   3
  -4 -14   5   -4.13   14.09   4
  -3 -14   5  136.56   24.81   4
   3 -14  -5  159.39   31.41   3
  -2 -14   5    3.81   16.49   4
   2 -14  -5    1.43    9.31   3
   1 -14  -5   64.38   18.26   4
   1 -14  -5   50.50   32.18   3
  -1 -14   5   68.97   19.18   4
   0 -14   5   -2.45   48.91   4
   0 -14  -5   26.22   19.68   4
   0 -14  -5   42.19   32.35   3
   1 -14   5  102.41   20.47   4
  -1 -14  -5   75.16   27.77   4
  -1 -14  -5  171.05   33.18   3
  -2 -14  -5   34.96   28.06   3
   2 -14   5    5.80   16.67   4
  -3 -14  -5  258.21   30.53   4
   3 -14   5  277.88   26.26   4
  -3 -14  -5  292.28   37.45   3
   4 -14   5   36.86   21.94   4
  -4 -14  -5   85.90   32.66   3
   4 -14   5   41.93   20.89   3
  -4 -14  -5   49.80   27.58   4
   5 -14   5  115.22   23.23   4
  -5 -14  -5  121.68   30.22   4
   6 -14   5   10.08   21.63   4
  -6 -14  -5   23.81   33.17   4
  -7 -14  -5   53.11   29.05   4
   7 -14   5   49.28   22.72   4
   9 -15  -5   -6.27   30.60   3
   8 -15  -5    8.77   43.38   3
  -8 -15   5   25.61   28.00   4
  -7 -15   5   26.94   25.20   4
   7 -15  -5   11.07   28.59   3
   6 -15  -5   -5.01   31.46   3
  -6 -15   5   23.39   24.56   4
   5 -15  -5   12.81   30.30   3
  -5 -15   5   16.27   34.84   4
  -4 -15   5    8.23  112.84   4
   3 -15  -5   -2.43  117.15   3
  -3 -15   5   -6.37  402.44   4
   2 -15  -5    2.72   29.25   3
  -1 -15   5   58.01   21.08   4
   1 -15  -5   70.91   33.49   3
   0 -15   5   11.32   18.80   4
   0 -15  -5    9.97   34.64   3
  -1 -15  -5   81.81   33.37   3
  -1 -15  -5   10.03   25.06   4
   1 -15   5   51.37   23.71   4
  -2 -15  -5   -9.29   26.29   4
  -2 -15  -5   15.37   19.25   3
   2 -15   5   -1.44   89.00   4
  -3 -15  -5   41.11   32.99   3
  -3 -15  -5   -5.37   39.11   4
  -4 -15  -5   -7.26   17.55   4
   4 -15   5   -1.79   39.19   4
   5 -15   5    4.31   66.50   4
  -5 -15  -5   23.01   41.63   4
  -6 -15  -5   -2.01   61.84   4
   4 -16  -5   24.61   28.77   3
  -4 -16   5   38.46   32.18   4
   3 -16  -5   31.52   31.87   3
  -3 -16   5   45.32   27.08   4
   2 -16  -5   23.42   32.27   3
   1 -16  -5    1.87   14.80   3
   0 -16   5    8.66   14.61   4
   0 -16  -5   10.89   30.59   3
   1 -16   5   30.95   19.18   4
  -1 -16  -5   28.49   40.43   3
   2 -16   5   25.50   21.78   4
  -3 -16  -5   24.90   42.97   4
  -4 -16  -5   11.72   24.34   4
 -19   0   6   -1.41    8.48   1
 -18   0   6   52.97   21.50   1
  17   0  -6   43.72   37.98   3
 -16   0   6    8.56   86.03   1
  16   0  -6   86.14   37.41   3
  15   0  -6  114.84   38.11   3
  14   0  -6  276.75   40.66   3
 -14   0   6  271.48   21.46   1
 -13   0   6   -3.92   19.22   1
  13   0  -6  160.34   33.39   3
 -12   0   6   37.57   14.93   1
 -11   0   6   29.78   15.18   1
 -10   0   6  263.63   20.28   1
  -9   0   6   11.92    9.37   1
  -8   0   6 1964.25   94.65   1
  -7   0   6   23.44    8.46   4
   6   0  -6    1.28   21.11   2
  -6   0   6   18.16    7.36   4
   5   0  -6   14.01    6.04   2
  -5   0   6   -9.34    4.42   4
   4   0  -6  239.29   16.99   2
  -4   0   6  232.62   14.14   4
  -3   0   6   -0.75    1.25   4
   3   0  -6    7.06    7.44   2
   2   0  -6  373.70   24.17   2
   1   0  -6   47.03   10.47   3
   1   0  -6   -5.40   11.90   2
   0   0  -6  495.74   41.38   3
   0   0  -6  587.60   33.17   2
  -1   0  -6    5.68    9.00   1
  -1   0  -6    8.61   20.05   2
  -1   0  -6    9.75    5.80   3
  -2   0  -6 1592.90   77.55   1
  -2   0  -6 1634.14   90.99   2
  -3   0  -6   -2.35    3.51   1
  -3   0  -6   13.57   13.88   2
  -4   0  -6 1810.86  101.90   2
  -4   0  -6 1798.80   86.85   1
  -5   0  -6   29.52   17.57   2
  -5   0  -6    1.57   12.40   1
  -6   0  -6  143.91   25.07   2
  -6   0  -6  132.80   13.20   1
  -7   0  -6   54.04   23.77   2
  -8   0  -6  587.45   30.74   1
  -8   0  -6  591.31   40.18   2
  -9   0  -6    0.60   12.80   1
  -9   0  -6   25.62   19.48   2
 -10   0  -6  758.46   39.82   1
 -10   0  -6  792.10   50.03   2
 -11   0  -6   16.09   14.43   1
 -11   0  -6   56.95   26.01   2
 -12   0  -6   83.27   27.91   2
 -12   0  -6   19.63   12.96   1
 -13   0  -6   -5.62    8.66   1
 -14   0  -6  116.40   18.00   1
 -15   0  -6   -0.82    4.64   1
 -19  -1   6    9.41   27.97   1
 -19   1   6    6.84   19.44   1
 -18  -1   6   59.14   21.17   1
 -18   1   6   40.31   19.88   1
 -17  -1   6   19.40   29.16   1
  17  -1  -6   -6.83   26.79   3
 -17   1   6    2.35    4.74   1
  17   1  -6  106.36   39.04   3
 -16  -1   6   70.29   18.38   1
 -16   1   6   83.24   18.18   1
  16   1  -6  182.52   37.12   3
  16  -1  -6   90.12   40.42   3
 -15  -1   6   39.00   16.75   1
  15  -1  -6   52.86   37.91   3
 -15   1   6    8.91   41.84   1
  14  -1  -6  116.83   35.66   3
 -14   1   6   23.52   13.46   1
 -14  -1   6   39.06   16.20   1
 -13  -1   6   11.35   22.61   1
  13  -1  -6   73.65   30.38   3
 -13   1   6   11.81   12.02   1
 -12  -1   6  545.96   29.15   1
 -12   1   6  503.61   28.83   1
  12  -1  -6  511.89   52.63   3
 -11  -1   6   68.41   16.85   1
 -11   1   6   63.84   16.12   1
 -10   1   6  636.69   33.07   1
  10  -1  -6  611.77   54.21   3
 -10  -1   6  616.91   32.89   1
  -9  -1   6  351.01   27.38   4
   9  -1  -6  449.80   40.70   3
  -9  -1   6  391.17   23.27   1
  -9   1   6  363.24   22.11   1
  -8  -1   6   31.64   13.30   1
  -8  -1   6   32.72   12.60   4
   7   1  -6   56.97    7.44   2
  -7  -1   6   69.74   14.08   4
   6  -1  -6 1087.04   87.46   3
   6  -1  -6 1171.86   63.98   2
   6   1  -6 1121.93   63.51   2
  -6  -1   6 1159.37   63.04   4
   5  -1  -6  371.37   34.42   3
   5   1  -6  336.95   21.42   2
  -5  -1   6  335.14   20.71   4
   5  -1  -6  359.18   21.77   2
   4  -1  -6 1133.62   59.16   2
  -4  -1   6 1046.34   57.46   4
   4   1  -6 1048.65   58.64   2
   4  -1  -6  940.70   79.75   3
   3  -1  -6   85.56   18.05   3
   3  -1  -6   66.65   12.54   2
   3   1  -6   80.07   13.48   2
  -3  -1   6   61.52    8.33   4
   2   1  -6   10.87    9.85   2
   2  -1  -6    6.67   10.71   2
   2  -1  -6    8.90   23.05   3
  -2  -1   6   -1.05    2.47   4
   1  -1  -6  739.14   56.66   3
   1  -1  -6  728.70   41.98   2
   1   1  -6  713.80   42.29   2
   0  -1  -6 2235.90  175.55   3
   0  -1  -6 2433.60  131.67   2
   0   1  -6 2402.70  131.67   2
  -1  -1  -6   11.41    8.29   1
  -1   1  -6    5.31    9.64   2
  -1  -1  -6    3.00    9.77   2
  -1  -1  -6   -9.06    7.74   3
  -1   1  -6   -5.01    4.49   1
  -2   1  -6  141.43   10.46   1
  -2  -1  -6  147.58   13.36   3
  -2  -1  -6  132.12   11.85   1
  -2   1  -6  148.42   19.39   2
  -2  -1  -6  132.93   19.69   2
  -3   1  -6 3282.87  177.13   2
  -3  -1  -6 3127.99  177.10   2
  -3  -1  -6 3182.99  151.49   1
  -3   1  -6 3101.77  151.15   1
  -4  -1  -6   30.40   18.60   2
  -4  -1  -6    0.08   35.30   1
  -4   1  -6   23.90   15.87   2
   4   1   6   -3.52    9.44   3
  -5   1  -6   55.09   19.99   2
  -5   1  -6   18.89    8.89   1
  -5  -1  -6   25.32   20.96   2
  -5  -1  -6   16.03   13.46   1
  -6  -1  -6  487.75   26.94   1
  -6  -1  -6  453.72   37.75   2
  -6   1  -6  511.94   25.51   1
  -6   1  -6  478.97   36.63   2
  -7   1  -6  503.80   26.30   1
  -7  -1  -6  493.34   27.49   1
  -7   1  -6  485.09   37.97   2
  -7  -1  -6  515.99   37.60   2
  -8   1  -6  183.74   28.19   2
  -8  -1  -6  149.37   25.88   2
  -8   1  -6  134.05   13.13   1
  -8  -1  -6  147.99   14.48   1
  -9   1  -6   65.81   23.51   2
  -9  -1  -6   45.32   22.43   2
  -9  -1  -6   39.47   12.49   1
  -9   1  -6   26.94   13.72   1
 -10   1  -6  152.02   14.24   1
 -10  -1  -6  126.02   16.78   1
 -10  -1  -6  172.64   29.73   2
 -10   1  -6  168.40   29.60   2
 -11  -1  -6  115.70   14.50   1
 -11   1  -6  121.37   14.58   1
 -11  -1  -6  131.37   30.37   2
 -11   1  -6  132.27   26.45   2
 -12   1  -6  250.10   18.84   1
 -12  -1  -6  241.23   20.03   1
 -12   1  -6  275.19   30.26   2
 -13   1  -6    7.97    9.41   1
 -13  -1  -6    6.13   17.49   1
 -14   1  -6   79.00   17.89   1
 -14  -1  -6  110.10   18.60   1
 -15  -1  -6   15.88   14.23   1
 -15   1  -6    6.44   25.14   1
 -19   2   6   17.56   35.95   1
 -18   2   6  135.35   23.29   1
 -18  -2   6  131.97   23.24   1
 -17   2   6   -0.86    3.47   1
 -17  -2   6   -5.12   15.51   1
 -16  -2   6    9.23   20.49   1
 -16   2   6   28.77   14.87   1
  15  -2  -6   31.80   51.20   3
 -15  -2   6   49.12   21.22   1
 -15   2   6   28.18   15.50   1
  14  -2  -6  248.82   48.47   3
 -14   2   6  250.59   20.21   1
 -14  -2   6  227.75   21.75   1
  13  -2  -6  138.36   40.70   3
 -13   2   6  124.09   16.73   1
 -13  -2   6  103.91   18.58   1
  12  -2  -6  473.75   53.52   3
 -12  -2   6  500.53   28.18   1
 -12   2   6  506.15   27.83   1
 -11   2   6   -2.41   63.21   1
  11  -2  -6   26.51   32.58   3
 -11  -2   6   -2.47   23.44   1
 -10  -2   6   58.75   17.39   4
  10  -2  -6  105.45   31.05   3
 -10   2   6   33.37   17.66   1
 -10  -2   6   51.49   15.37   1
  -9  -2   6  103.40   18.32   4
  -9   2   6   87.89   13.68   1
   9  -2  -6  118.35   28.22   3
  -9  -2   6   76.36   15.83   1
  -8  -2   6  346.53   26.49   4
  -8  -2   6  347.33   20.95   1
   8  -2  -6  364.28   40.12   3
   7   2  -6  264.58   16.96   2
   7  -2  -6  332.50   33.00   3
  -7  -2   6  336.70   17.77   1
  -7  -2   6  351.45   22.85   4
   6   2  -6 1068.61   59.65   2
   6  -2  -6 1048.91   82.79   3
   6  -2  -6 1079.82   60.43   2
  -6  -2   6 1068.13   59.36   4
   5  -2  -6   -2.58   11.43   3
   5  -2  -6   -1.61   12.24   2
   5   2  -6    9.68    4.78   2
  -5  -2   6   -7.03   11.51   4
   4  -2  -6  110.30   12.34   2
   4  -2  -6   74.75   27.26   3
   4   2  -6   95.01   12.97   2
  -4  -2   6   94.74   10.07   4
  -3  -2   6  331.02   20.37   4
   3   2  -6  324.14   22.14   2
   3  -2  -6  331.56   34.59   3
   3  -2  -6  359.10   22.54   2
   2  -2  -6  685.20   53.40   3
   2   2  -6  677.26   40.59   2
   2  -2  -6  750.07   40.39   2
  -2  -2   6  664.68   38.80   4
   1   2  -6  424.49   26.21   2
   1  -2  -6  406.42   32.11   3
   1  -2  -6  405.26   25.34   2
  -1  -2   6  359.41   22.89   4
   0   2  -6 1330.83   72.01   2
   0  -2  -6 1231.31   71.87   2
   0  -2  -6 1261.59   95.79   3
   0  -2  -6 1262.21   61.51   1
  -1  -2  -6    4.00    6.05   1
  -1   2  -6   16.65   15.06   2
  -1  -2  -6    7.87    8.88   3
  -1  -2  -6   -0.58    6.30   2
  -2   2  -6  338.89   26.49   2
  -2  -2  -6  402.39   29.91   3
  -2  -2  -6  348.04   20.22   1
  -2  -2  -6  346.25   27.43   2
  -2   2  -6  383.07   19.03   1
  -3   2  -6  278.47   23.62   2
  -3  -2  -6  281.06   25.34   2
  -3  -2  -6  316.51   17.77   1
  -3   2  -6  284.36   15.94   1
  -3  -2  -6  313.54   24.32   3
  -4  -2  -6  751.04   47.24   2
  -4   2  -6  756.13   37.16   1
  -4   2  -6  802.16   45.30   2
  -4  -2  -6  720.94   37.92   1
  -5  -2  -6   64.14   12.94   1
  -5   2  -6   77.30   21.01   2
  -5  -2  -6   66.91   25.85   2
  -5   2  -6   64.67    9.43   1
  -6  -2  -6   21.09   34.92   2
  -6  -2  -6   27.32   14.63   1
  -6   2  -6   16.80   10.43   1
  -6   2  -6   39.19   20.75   2
  -7  -2  -6   46.23   15.72   1
  -7   2  -6   58.64   23.19   2
  -7   2  -6   43.20   11.30   1
  -7  -2  -6   56.04   32.01   2
  -8   2  -6   84.31   10.95   1
  -8   2  -6   81.10   23.11   2
  -8  -2  -6   74.92   13.96   1
  -8  -2  -6  101.42   28.99   2
  -9   2  -6  295.04   18.76   1
  -9  -2  -6  339.64   33.31   2
  -9  -2  -6  317.82   20.02   1
  -9   2  -6  312.71   30.77   2
 -10   2  -6  197.34   30.79   2
 -10   2  -6  183.39   14.83   1
 -10  -2  -6  148.17   16.98   1
 -10  -2  -6  175.38   32.24   2
 -11  -2  -6    9.60   16.51   1
 -11   2  -6    7.70   18.43   1
 -11   2  -6   49.76   26.44   2
 -11  -2  -6    1.94   20.76   2
 -12  -2  -6    2.50    8.71   1
 -12   2  -6   22.56   28.32   2
 -13   2  -6    5.85   39.28   1
 -13   2  -6   12.16   29.75   2
 -14   2  -6   33.12   18.23   1
 -14  -2  -6   40.87   17.35   1
 -15   2  -6   39.16   18.65   1
 -15  -2  -6   24.19   13.30   1
 -19   3   6   15.65   18.89   1
 -18  -3   6   90.13   25.16   1
 -18   3   6   61.82   21.16   1
 -17   3   6   71.63   19.99   1
 -17  -3   6   93.36   22.40   1
  16  -3  -6   83.45   58.10   3
 -16  -3   6  168.45   22.08   1
 -16   3   6  167.62   21.25   1
 -15   3   6   57.83   17.68   1
 -15  -3   6   63.54   19.77   1
  15  -3  -6   26.60   78.93   3
 -14   3   6    2.56   10.56   1
 -14  -3   6   -4.04   21.23   1
 -13  -3   6  123.50   18.29   1
 -13   3   6  119.76   15.53   1
  13  -3  -6   71.87   54.14   3
 -12  -3   6  115.15   24.70   4
  12  -3  -6   62.72   52.88   3
 -12  -3   6  114.45   16.15   1
 -12   3   6   97.43   15.92   1
 -11  -3   6  885.38   45.39   1
 -11   3   6  926.01   44.91   1
 -11  -3   6  856.35   53.42   4
  11  -3  -6  819.79   77.99   3
 -10  -3   6  704.18   36.00   1
 -10  -3   6  652.02   44.42   4
 -10   3   6  660.31   34.95   1
  10  -3  -6  644.23   63.60   3
  -9  -3   6   48.49   21.68   4
   9  -3  -6   31.80   54.23   3
  -9   3   6   75.22   12.99   1
  -9  -3   6   55.78   14.37   1
  -8  -3   6   16.24   70.81   4
  -8  -3   6   82.27   13.51   1
   7  -3  -6  103.02   37.06   3
  -7  -3   6  123.14   14.94   4
  -7  -3   6  130.93   12.78   1
   6   3  -6  293.49   17.75   2
  -6  -3   6  323.37   20.85   4
   6  -3  -6  319.80   20.70   2
   6  -3  -6  253.14   36.31   3
   5   3  -6  398.77   25.50   2
   5  -3  -6  356.08   41.72   3
   5  -3  -6  452.43   26.22   2
  -5  -3   6  430.46   25.56   4
   4  -3  -6  752.89   40.60   2
  -4  -3   6  692.37   39.37   4
   4   3  -6  643.72   40.52   2
   4  -3  -6  706.69   54.65   3
  -3  -3   6   29.46    9.35   4
  -3   3   6   19.85    3.27   4
   3  -3  -6   43.47   12.01   2
   3  -3  -6   42.17   16.09   3
   3   3  -6   26.96   12.03   2
   2  -3  -6   18.85   26.40   2
   2  -3  -6   33.86   18.13   3
  -2  -3   6   40.10   10.61   4
   2   3  -6   41.55   12.55   2
  -1  -3   6 1254.65   71.05   4
   1  -3  -6 1324.77   72.98   2
   1   3  -6 1284.69   72.62   2
   1  -3  -6 1274.68   97.33   3
   0  -3  -6  392.06   28.02   2
   0  -3  -6  458.47   35.33   3
   0  -3  -6  459.61   22.76   1
   0   3  -6  416.06   28.23   2
  -1   3  -6 3936.07  218.86   2
  -1  -3  -6 3646.91  218.90   2
  -1  -3  -6 4028.75  293.26   3
  -1  -3  -6 4130.82  187.59   1
  -2   3  -6  926.98   45.22   1
  -2  -3  -6  861.16   53.73   2
  -2  -3  -6 1003.96   71.24   3
  -2   3  -6  922.54   54.23   2
  -2  -3  -6  952.46   46.20   1
  -3   3  -6   16.05    6.61   1
  -3  -3  -6    9.22   13.16   1
  -3  -3  -6    9.79   11.49   3
  -3  -3  -6   36.91   14.07   2
  -4  -3  -6  306.44   25.14   2
  -4   3  -6  309.26   27.11   2
  -4  -3  -6  335.54   19.56   1
  -4   3  -6  310.26   16.45   1
  -5  -3  -6  112.36   15.35   1
  -5   3  -6  107.53   23.10   2
  -5  -3  -6   49.77   38.71   2
  -5   3  -6  114.26    9.75   1
  -6   3  -6  426.68   32.62   2
  -6  -3  -6  359.75   37.83   2
  -6  -3  -6  442.12   25.77   1
  -6   3  -6  414.17   21.67   1
  -7   3  -6 1011.37   49.35   1
  -7   3  -6  978.74   61.33   2
  -7  -3  -6 1021.25   50.99   1
  -7  -3  -6  998.10   63.41   2
  -8   3  -6  446.11   24.71   1
  -8  -3  -6  496.32   26.64   1
  -8  -3  -6  472.72   39.35   2
  -8   3  -6  485.28   34.71   2
  -9   3  -6   26.59   28.14   2
  -9   3  -6    3.91  949.59   1
  -9  -3  -6   -0.93    7.97   2
  -9  -3  -6    8.14   89.21   1
 -10  -3  -6   39.20   17.60   1
 -10   3  -6   16.24   36.22   2
 -10   3  -6   19.56   10.80   1
 -11   3  -6  169.24   16.56   1
 -11   3  -6  182.63   29.58   2
 -11  -3  -6  162.02   19.09   1
 -12   3  -6  172.56   31.78   2
 -12   3  -6  156.68   17.22   1
 -12  -3  -6  147.28   20.80   1
 -13   3  -6  251.87   21.43   1
 -13   3  -6  255.05   35.35   2
 -13  -3  -6  223.90   23.38   1
 -14  -3  -6   14.48   16.91   1
 -14   3  -6   59.89   19.55   1
 -19   4   6   48.85   24.23   1
 -18  -4   6   18.65   16.78   1
 -18   4   6   12.66   19.04   1
 -17   4   6    5.17   19.43   1
 -17  -4   6   18.86   16.26   1
  17  -4  -6   37.71   28.21   3
  16  -4  -6   75.03   31.00   3
 -16  -4   6   52.03   20.55   1
 -16   4   6   27.94   17.18   1
 -15  -4   6   81.36   18.84   1
 -15   4   6   91.36   17.76   1
  15  -4  -6  142.30   31.17   3
 -14   4   6  149.64   18.02   1
 -14  -4   6  154.74   18.89   1
  14  -4  -6  136.15   41.48   3
 -13  -4   6   87.28   18.94   1
 -13   4   6   87.74   15.68   1
 -13  -4   6  134.09   27.44   4
 -12  -4   6   87.58   21.92   4
 -12  -4   6   45.02   15.28   1
 -12   4   6   42.03   13.96   1
 -11  -4   6  120.99   26.88   4
 -11  -4   6   98.11   17.67   1
  11  -4  -6   26.01  371.56   3
 -11   4   6  123.20   15.06   1
 -10   4   6   11.15   15.46   1
 -10  -4   6   19.25   22.13   1
 -10  -4   6    2.26    4.33   4
  -9  -4   6  434.76   24.18   1
  -9   4   6  397.68   22.47   1
   9  -4  -6  279.13   55.54   3
  -9  -4   6  431.85   35.31   4
   8  -4  -6  877.74   78.00   3
  -8  -4   6  987.43   57.09   4
  -8  -4   6 1007.09   47.96   1
  -7  -4   6  810.85   47.65   4
  -7  -4   6  879.51   41.64   1
   7  -4  -6  810.32   65.31   3
  -6  -4   6   88.41   15.32   4
   6  -4  -6  108.63   19.59   3
  -6  -4   6   80.84   10.38   1
   6  -4  -6   65.19    6.95   4
   6   4  -6   72.97   10.24   2
   5  -4  -6   53.37   17.60   3
   5   4  -6   43.14   11.80   2
   5  -4  -6   20.67   14.11   2
   5  -4  -6   24.81    4.47   4
  -5  -4   6   10.59   25.41   4
   4  -4  -6  348.04   30.78   3
  -4  -4   6  341.23   20.44   4
   4  -4  -6  321.41   22.26   2
   4  -4  -6  304.50   17.94   4
   4   4  -6  308.30   21.48   2
   3  -4  -6   30.14   19.59   3
   3   4  -6   18.54   17.21   2
   3  -4  -6   33.88   12.11   2
   3  -4  -6   21.18   11.36   4
  -3  -4   6   33.41   11.94   4
   2  -4  -6 2524.77  129.51   4
   2  -4  -6 2314.40  132.48   2
   2   4  -6 2168.65  132.14   2
   2  -4  -6 2490.48  178.08   3
  -2  -4   6 2346.76  130.03   4
   1  -4  -6 1043.92   59.53   2
   1   4  -6  906.07   59.38   2
   1  -4  -6 1167.28   58.05   4
  -1  -4   6 1027.35   58.14   4
   1  -4  -6 1065.51   79.71   3
   0  -4   6   20.22    9.07   4
   0  -4  -6    1.32    3.06   2
   0  -4  -6   10.14   15.29   3
   0  -4  -6   43.34   11.24   4
   0  -4  -6   13.85   10.85   1
  -1  -4  -6   60.04   15.95   3
  -1  -4  -6   48.48   10.44   1
  -1  -4  -6   76.22   14.81   4
  -1  -4  -6   59.74   18.37   2
  -2  -4  -6  247.56   22.89   2
  -2  -4  -6  260.20   16.48   1
  -2  -4  -6  259.25   25.14   3
  -3  -4  -6  504.31   26.10   1
  -3   4  -6  501.00   24.52   1
  -3  -4  -6  472.10   39.75   3
  -3  -4  -6  487.95   33.00   2
  -4   4  -6 1345.48   74.75   2
  -4  -4  -6 1239.18   97.38   3
  -4  -4  -6 1263.62   74.56   2
  -4  -4  -6 1282.80   63.38   1
  -4   4  -6 1309.43   61.96   1
  -5   4  -6   64.23   26.52   2
  -5   4  -6   66.59    8.58   1
  -5  -4  -6  107.14   22.69   2
  -5  -4  -6   70.74   14.68   1
  -6   4  -6  239.68   31.28   2
  -6   4  -6  238.28   14.56   1
  -6  -4  -6  268.18   19.15   1
  -6  -4  -6  290.78   28.78   2
  -7   4  -6  117.65   29.00   2
  -7  -4  -6  119.31   17.69   1
  -7   4  -6  105.51   10.83   1
  -7  -4  -6  174.76   23.32   2
  -8  -4  -6   53.88   17.66   2
  -8   4  -6   19.70    8.27   1
  -8  -4  -6   15.74   13.95   1
  -8   4  -6    7.51   40.70   2
  -9  -4  -6  389.19   25.17   1
  -9  -4  -6  404.34   31.12   2
  -9   4  -6  397.41   36.43   2
  -9   4  -6  376.53   21.29   1
 -10   4  -6  269.47   17.23   1
 -10   4  -6  252.82   33.26   2
 -10  -4  -6  252.97   21.95   1
 -11   4  -6   30.48   28.59   2
 -11   4  -6   24.32   15.15   1
 -11  -4  -6   29.43   19.71   1
 -12  -4  -6   36.00   19.61   1
 -12   4  -6   66.58   27.05   2
 -13  -4  -6   13.29   19.33   1
 -13   4  -6   24.93   33.70   2
 -14  -4  -6  103.64   22.87   1
 -14   4  -6   96.98   37.12   2
 -18  -5   6   52.39   23.78   1
 -17  -5   6   50.15   22.07   1
 -17   5   6   92.53   21.07   1
 -16  -5   6   65.63   22.52   1
 -16   5   6   84.67   20.33   1
  16  -5  -6   80.25   33.45   3
  15  -5  -6  285.86   38.56   3
 -15  -5   6  271.42   22.80   1
 -15   5   6  273.23   22.14   1
 -14  -5   6  105.71   18.62   1
 -14   5   6  135.53   17.51   1
  14  -5  -6  159.23   31.41   3
 -13   5   6   29.31   14.56   1
 -13  -5   6   97.77   23.89   4
  13  -5  -6   48.72   27.45   3
 -13  -5   6   -2.86   13.54   1
 -12  -5   6    6.09   15.84   1
  12  -5  -6   69.86   25.10   3
 -12  -5   6   40.75   23.69   4
 -12   5   6    4.18   15.98   1
 -11   5   6   24.75   13.88   1
  11  -5  -6   44.28   24.56   3
 -11  -5   6   25.11   21.22   4
 -11  -5   6    9.70   14.98   1
  10  -5  -6   80.69   28.72   3
 -10   5   6   32.56   12.94   1
 -10  -5   6   15.88   36.21   4
 -10  -5   6   18.22   12.72   1
  -9  -5   6  420.90   23.84   1
   9  -5  -6  382.50   40.62   3
  -9  -5   6  383.35   36.57   4
  -8  -5   6  118.68   14.45   1
  -8  -5   6  152.34   19.95   4
   8  -5  -6   92.77   10.60   4
   8  -5  -6  127.46   26.29   3
  -7  -5   6   30.71   19.40   4
   7  -5  -6   52.97   21.34   3
   7  -5  -6   20.20    8.97   4
  -7  -5   6   24.63   10.94   1
  -6  -5   6 1073.70   48.80   1
   6  -5  -6 1012.92   77.17   3
   6  -5  -6  978.97   54.69   4
  -6  -5   6  981.66   56.32   4
   6   5  -6  928.30   55.84   2
  -5  -5   6   94.08   17.25   4
  -5  -5   6  114.04   10.30   1
   5  -5  -6  108.28   23.94   3
   5   5  -6   62.94   13.85   2
   5  -5  -6   95.84    7.99   4
   4  -5  -6   -5.58    4.88   4
  -4  -5   6    6.07   14.28   4
   4  -5  -6    0.43   55.86   3
   4  -5  -6    1.23   12.10   2
   3  -5  -6   17.97    7.22   4
   3  -5  -6    5.55   12.17   2
   3  -5  -6   -0.34    1.28   3
  -3  -5   6   -4.30   14.16   4
   2  -5  -6  319.98   21.67   4
   2  -5  -6  347.32   30.77   3
   2  -5  -6  348.30   23.20   2
  -2  -5   6  350.60   22.50   4
  -1  -5   6  253.55   18.17   4
   1  -5  -6  244.09   19.72   2
   1  -5  -6  271.90   26.77   3
   1  -5  -6  253.67   19.77   4
   0  -5  -6   85.07   10.91   1
   0  -5   6   78.57   13.14   4
   0  -5  -6  105.70   16.32   4
   0  -5  -6   70.67   19.71   3
   0  -5  -6   86.93   15.51   2
  -1  -5  -6 1156.57   89.95   3
  -1  -5  -6 1206.24   66.36   4
   1  -5   6 1216.60   65.85   4
  -1  -5  -6 1119.08   67.65   2
  -1  -5  -6 1183.57   57.62   1
  -2  -5  -6   56.16   20.78   3
  -2  -5  -6   39.01   33.66   2
  -2  -5  -6   63.69   13.24   1
  -2  -5  -6   95.83   18.17   4
  -3  -5  -6   17.61   48.02   2
  -3  -5  -6   46.25   13.79   1
  -3  -5  -6   45.50   20.26   3
  -3  -5  -6   94.88   20.25   4
  -4  -5  -6  164.23   16.29   1
  -4   5  -6  167.04   10.78   1
  -4  -5  -6  186.86   27.59   2
  -4  -5  -6  197.58   23.05   3
  -5   5  -6  193.15   11.90   1
  -5  -5  -6  190.15   18.94   1
  -5  -5  -6  229.61   29.81   2
  -6  -5  -6  309.98   30.55   2
  -6   5  -6  261.69   14.71   1
  -6  -5  -6  260.86   22.19   1
  -7   5  -6  120.99   10.19   1
  -7   5  -6  113.43   30.68   2
  -7  -5  -6  148.84   18.49   1
  -7  -5  -6  144.28   24.19   2
  -8   5  -6  275.12   16.87   1
  -8  -5  -6  324.71   23.05   1
  -8  -5  -6  330.18   28.19   2
  -8   5  -6  323.37   33.28   2
  -9  -5  -6   -6.87   23.29   1
  -9  -5  -6   20.89   20.35   2
  -9   5  -6   14.23    9.87   1
  -9   5  -6    3.41  119.69   2
 -10   5  -6   13.36   43.07   2
 -10  -5  -6   22.27   17.92   1
 -11  -5  -6  188.52   23.14   1
 -11   5  -6  223.99   33.40   2
 -12  -5  -6   20.31   14.57   1
 -12   5  -6    9.93   26.33   2
 -13  -5  -6   82.34   26.64   1
 -13   5  -6   61.78   32.31   2
 -14  -5  -6   -6.36  143.59   1
 -14   5  -6  -10.65   39.04   2
 -17  -6   6   11.55   22.80   1
  16  -6  -6   17.46   31.81   3
 -16  -6   6   -7.42   35.78   1
  15  -6  -6  191.97   37.63   3
 -15  -6   6  147.11   22.54   1
 -15   6   6  167.49   20.34   1
 -14  -6   6   19.83   15.19   1
 -14   6   6   15.03   16.20   1
  14  -6  -6   19.03   27.67   3
 -14  -6   6   48.71   26.77   4
 -13   6   6   77.20   16.18   1
 -13  -6   6   72.87   17.82   1
 -13  -6   6  117.58   27.36   4
  13  -6  -6   76.39   32.07   3
 -12   6   6   95.30   14.86   1
 -12  -6   6   89.80   17.11   1
 -12  -6   6  100.40   30.10   4
  12  -6  -6   86.90   29.26   3
 -11  -6   6    1.90   25.43   4
 -11   6   6   17.21   14.65   1
 -11  -6   6    9.73   15.23   1
  11  -6  -6   11.68   22.32   3
 -10   6   6   10.46   10.95   1
 -10  -6   6   -3.31    8.42   4
 -10  -6   6    2.10    8.66   1
  10  -6  -6    9.80   19.89   3
   9  -6  -6 1648.98  134.01   3
  -9  -6   6 1842.02   99.38   4
  -9   6   6 1861.54   85.13   1
   9  -6  -6 1568.34   96.56   4
  -9  -6   6 1889.73   85.72   1
  -8  -6   6   40.73   16.08   4
   8  -6  -6   21.24   27.54   3
   8  -6  -6   -1.20    7.53   4
  -8  -6   6   16.26   13.40   1
   7  -6  -6  385.01   22.75   4
  -7  -6   6  383.78   27.25   4
  -7  -6   6  384.79   21.52   1
   7  -6  -6  355.56   38.28   3
   6  -6  -6  316.51   18.22   4
   6  -6  -6  300.63   34.90   3
  -6  -6   6  299.13   24.66   4
   6   6  -6  239.83   21.04   2
  -6  -6   6  319.24   17.53   1
   5  -6  -6    2.12   15.44   4
  -5  -6   6   11.99    7.88   1
   4  -6  -6  178.41   19.97   2
   4  -6  -6  200.91   14.60   4
  -4  -6   6  222.60   18.16   4
  -4  -6   6  207.88   12.48   1
   4  -6  -6  171.94   31.69   3
   3  -6  -6 1073.92   61.67   4
  -3  -6   6 1167.78   62.92   4
   3  -6  -6 1106.17   64.05   2
   3  -6  -6 1165.88   86.30   3
  -3  -6   6 1083.22   53.74   1
   2  -6  -6  234.83   25.98   3
   2  -6  -6  181.96   20.03   2
   2  -6  -6  218.95   15.64   4
  -2  -6   6  236.99   18.93   4
   1  -6  -6  573.66   36.57   2
   1  -6  -6  593.18   36.31   4
   1  -6  -6  669.61   49.58   3
  -1  -6   6  582.34   35.57   4
   0  -6  -6   28.98   10.18   1
   0  -6   6   39.19   13.84   4
   0  -6  -6   30.07   13.93   2
   0  -6  -6   15.97   43.99   4
   0  -6  -6   32.17   22.85   3
  -1  -6  -6   17.19   14.75   2
  -1  -6  -6    7.98    8.58   1
  -1  -6  -6   18.75   15.12   4
   1  -6   6   19.81   13.02   4
  -1  -6  -6   -0.86    8.35   3
  -2  -6  -6  101.99   14.57   1
   2  -6   6   80.59   16.10   4
  -2  -6  -6   78.30   23.79   3
  -2  -6  -6  114.80   21.99   4
  -2  -6  -6  114.58   18.04   2
  -3  -6  -6  630.04   39.18   2
  -3  -6  -6  588.84   31.21   1
  -3  -6  -6  559.34   48.78   3
   3  -6   6  629.48   35.96   4
  -3  -6  -6  570.05   40.20   4
   4  -6   6   45.71   12.93   3
  -4  -6  -6   22.82   13.02   1
  -4  -6  -6   43.80   21.16   3
  -4  -6  -6   52.80   27.18   4
  -5  -6  -6  123.82   32.28   2
  -5  -6  -6  163.45   16.99   1
  -5   6  -6  159.26   10.48   1
  -6  -6  -6   20.07   18.83   1
  -6  -6  -6   12.68   24.93   2
  -7  -6  -6   19.63   15.94   1
  -7  -6  -6   17.99   44.83   2
  -8  -6  -6   12.79   19.62   1
  -8  -6  -6   -0.65    6.95   2
  -8   6  -6   -3.90    7.51   2
  -9   6  -6  495.02   40.81   2
  -9  -6  -6  463.55   29.63   1
 -10  -6  -6   17.23   23.54   1
 -11  -6  -6  184.19   25.18   1
 -11   6  -6  180.27   36.48   2
 -12  -6  -6   33.02   28.91   1
 -13   6  -6   91.90   35.77   2
 -13  -6  -6   78.07   26.07   1
 -14   6  -6   43.56   38.87   2
 -17  -7   6  118.69   23.27   1
 -16  -7   6   37.43   19.49   1
  15  -7  -6   59.41   39.76   3
 -15  -7   6  141.43   32.43   4
 -15  -7   6   89.92   19.95   1
  14  -7  -6    0.58    5.32   3
 -14  -7   6   53.24   26.74   4
 -14  -7   6   -2.54   19.58   1
  13  -7  -6   -6.25   21.34   3
 -13  -7   6   -0.94    8.88   1
 -13  -7   6   36.66   25.05   4
 -12  -7   6   -3.27   14.24   1
  12  -7  -6   12.43   30.27   3
 -12  -7   6    9.27   33.92   4
 -12   7   6    9.16    9.20   1
  11  -7  -6  247.11   35.34   3
 -11  -7   6  294.76   32.79   4
 -11   7   6  263.04   18.42   1
 -11  -7   6  275.77   19.41   1
  10  -7  -6    6.79   56.55   3
 -10  -7   6   16.76   36.67   4
 -10  -7   6   15.75   14.79   1
 -10   7   6   31.17   12.53   1
  -9  -7   6    0.67    3.16   4
  -9   7   6   18.48   10.68   1
  -9  -7   6   21.11   11.07   1
   9  -7  -6    5.78   36.47   3
   8  -7  -6  221.04   16.85   4
   8  -7  -6  222.80   31.53   3
  -8  -7   6  258.87   16.20   1
  -8  -7   6  286.94   24.46   4
  -7  -7   6  545.04   28.06   1
  -7  -7   6  570.60   36.08   4
   7  -7  -6  547.53   31.08   4
   7  -7  -6  480.00   49.77   3
   6  -7  -6   11.05    9.95   4
  -6  -7   6   24.61   10.43   1
  -6  -7   6    7.23   31.05   4
  -5  -7   6 2053.64  108.50   4
   5  -7  -6 1944.81  147.85   3
   5  -7  -6 1903.41  106.80   4
  -5  -7   6 1897.71   93.29   1
   4  -7  -6  273.03   19.19   4
  -4  -7   6  300.50   22.35   4
   4  -7  -6  303.49   32.70   3
  -4  -7   6  275.30   15.45   1
  -3  -7   6  103.67    8.09   1
   3  -7  -6   96.43   18.55   2
  -3  -7   6  104.41   17.75   4
   3  -7  -6  140.34   25.85   3
   3  -7  -6  105.86   13.03   4
  -2  -7   6   13.50   14.46   4
  -2  -7   6   13.30    5.33   1
   2  -7  -6   28.55   11.62   4
   2  -7  -6    4.93   42.30   2
   2  -7  -6    3.96  365.75   3
   1  -7  -6  123.14   20.40   2
   1  -7  -6  104.37   21.96   4
  -1  -7   6  127.53   17.61   4
   1  -7  -6  160.75   25.44   3
  -1  -7   6  108.57    7.15   1
   0  -7  -6   -1.46   38.79   3
   0  -7   6   -1.88    5.30   4
   0  -7  -6    0.09    4.16   2
   0  -7  -6  -10.04   16.35   4
  -1  -7  -6 1000.08   60.47   2
  -1  -7  -6 1017.27   50.84   1
  -1  -7  -6 1062.72   60.44   4
   1  -7   6 1027.37   58.36   4
  -1  -7  -6 1037.59   80.23   3
  -2  -7  -6   41.90   26.34   3
  -2  -7  -6   55.82   22.20   2
  -2  -7  -6   46.90   13.52   1
   2  -7   6   30.02   17.50   4
  -2  -7  -6   59.44   25.33   4
  -3  -7  -6   19.17   19.35   1
  -3  -7  -6   49.27   20.04   2
   3  -7   6   26.06   16.19   4
  -3  -7  -6   48.60   23.19   4
   3  -7   6   40.65   14.71   3
  -3  -7  -6   33.17   22.52   3
  -4  -7  -6   36.11   14.75   1
  -4  -7  -6   59.92   22.66   4
   4  -7   6   31.18   15.62   4
  -4  -7  -6   40.56   21.34   3
   4  -7   6   23.18   13.23   3
  -4  -7  -6   43.41   18.84   2
  -5  -7  -6  787.48   64.17   3
  -5  -7  -6  798.99   52.31   4
  -5  -7  -6  797.19   41.86   1
  -5  -7  -6  839.66   48.66   2
  -6  -7  -6  129.71   16.48   1
  -6  -7  -6  160.43   20.26   2
  -7  -7  -6 1840.49  107.32   2
  -7  -7  -6 1923.12   93.21   1
  -8  -7  -6   32.74   18.50   2
  -8  -7  -6   12.57   19.90   1
  -9   7  -6  255.14   36.35   2
  -9  -7  -6  277.90   24.11   1
 -10   7  -6    5.09  104.07   2
 -10  -7  -6   30.15   21.82   1
 -11  -7  -6   52.73   23.31   1
 -11   7  -6   81.53   36.93   2
 -12   7  -6  -10.29   48.23   2
 -13  -7  -6  126.11   27.54   1
 -13   7  -6  135.21   42.78   2
 -14   7  -6   29.80   37.65   2
 -16  -8   6   11.83   10.50   1
  15  -8  -6   58.77   40.91   3
 -15  -8   6   76.39   18.47   1
 -15  -8   6  111.01   36.34   4
 -14  -8   6   41.68   23.58   4
 -14  -8   6    7.98   13.60   1
 -13  -8   6  244.20   34.29   4
  13  -8  -6  220.97   36.04   3
 -13  -8   6  235.74   19.57   1
 -12  -8   6  127.84   15.28   1
 -12  -8   6  186.25   30.59   4
  12  -8  -6   97.15   31.48   3
  11  -8  -6   17.67   36.56   3
 -11  -8   6   29.64   13.48   1
 -11  -8   6   -3.62   11.64   4
  10  -8  -6    0.87    3.47   3
 -10  -8   6   -0.10    0.52   1
  -9   8   6  159.46   13.06   1
  -9  -8   6  143.15   20.65   4
  -9  -8   6  138.92   13.91   1
   9  -8  -6  119.39   29.83   3
  -8  -8   6   14.76   15.83   4
  -8  -8   6    8.86    7.57   1
  -7  -8   6  706.75   41.34   4
   7  -8  -6  713.36   38.79   4
   7  -8  -6  626.73   54.45   3
  -7  -8   6  666.89   34.22   1
  -6  -8   6   72.75   10.11   1
   6  -8  -6   85.12   11.17   4
  -6  -8   6   79.89   22.28   4
   6  -8  -6  103.05   24.08   3
   5  -8  -6   30.42   24.94   3
  -5  -8   6   -7.12   12.63   4
  -5  -8   6   17.17    7.28   1
   5  -8  -6   14.19    8.66   4
   4  -8  -6    4.40   51.34   4
   4  -8  -6   24.13   24.73   3
  -4  -8   6   36.64   16.49   4
  -4  -8   6   16.08    8.87   1
   3  -8  -6  280.80   31.18   3
  -3  -8   6  210.50   12.35   1
   3  -8  -6  202.17   17.84   4
  -3  -8   6  224.26   22.18   4
   2  -8  -6    9.56   12.22   4
  -2  -8   6    0.35    3.27   4
   2  -8  -6   12.63   34.18   3
   1  -8  -6  333.67   23.20   4
   1  -8  -6  343.63   35.41   3
  -1  -8   6  322.56   25.00   4
   1  -8  -6  310.18   26.88   2
   0  -8  -6  131.88   29.25   3
   0  -8  -6   86.36   24.10   4
   0  -8   6  104.08   19.04   4
   0  -8  -6  104.32   22.53   2
  -1  -8  -6    5.54   17.74   1
  -1  -8  -6    1.29    4.76   2
  -1  -8  -6   -0.37    3.29   3
  -2  -8  -6   63.56   25.81   4
   2  -8   6   92.78   17.38   4
  -2  -8  -6   45.65   29.21   3
  -2  -8  -6   66.07   13.10   1
  -2  -8  -6   75.38   25.92   2
  -3  -8  -6  273.73   27.75   4
  -3  -8  -6  274.12   30.48   3
   3  -8   6  263.60   25.24   3
   3  -8   6  288.45   21.66   4
  -3  -8  -6  255.11   17.79   1
  -3  -8  -6  315.70   26.41   2
  -4  -8  -6  163.48   15.63   1
  -4  -8  -6  184.01   24.71   4
  -4  -8  -6  162.00   20.95   2
   4  -8   6  158.17   18.35   3
   4  -8   6  158.94   16.70   4
  -4  -8  -6  185.07   25.88   3
  -5  -8  -6   88.35   21.41   4
   5  -8   6   54.47   16.46   4
  -5  -8  -6   53.28   20.85   2
  -5  -8  -6   43.13   15.17   1
  -5  -8  -6   89.79   22.98   3
   6  -8   6  172.01   18.44   4
  -6  -8  -6  134.98   18.87   1
  -6  -8  -6  188.39   29.40   4
  -6  -8  -6  152.35   22.26   2
  -7  -8  -6    6.35   25.85   1
  -7  -8  -6   16.75   14.83   2
  -8  -8  -6   -6.89   10.36   1
  -9  -8  -6  205.52   23.68   1
 -10  -8  -6   33.72   22.16   1
 -11   8  -6   89.04   38.25   2
 -11  -8  -6   93.57   26.38   1
 -12  -8  -6   32.07   27.41   1
 -13   8  -6   26.08   73.25   2
 -16  -9   6   21.21   19.36   1
 -16  -9   6   76.60   33.35   4
  15  -9  -6  174.18   34.08   3
 -15  -9   6  243.17   37.91   4
 -15  -9   6  164.45   20.15   1
 -14  -9   6    2.79   15.36   1
 -14  -9   6   40.12   28.95   4
  14  -9  -6    5.66   22.94   3
  13  -9  -6    2.09   12.81   3
 -13  -9   6   18.52   13.53   1
 -13  -9   6   26.07   22.44   4
 -12  -9   6   30.63   25.15   4
 -12  -9   6   -4.28   25.55   1
  12  -9  -6   -4.26   21.33   3
 -11  -9   6   20.96   13.16   1
 -11  -9   6   43.41   32.74   4
  11  -9  -6   37.53   21.69   3
  10  -9  -6   42.92   21.54   3
 -10  -9   6   -9.16   13.20   4
 -10  -9   6   15.13   13.48   1
  -9  -9   6   95.69   12.98   1
   9  -9  -6  133.78   22.59   3
  -9  -9   6  137.63   21.13   4
  -8  -9   6  102.22   11.41   1
  -8  -9   6  126.73   19.86   4
   8  -9  -6   77.56   22.96   3
  -7  -9   6   74.93    9.95   1
  -7  -9   6   79.80   21.06   4
   7  -9  -6   55.78   23.20   3
   6  -9  -6  255.93   29.95   3
   6  -9  -6  249.14   17.16   4
  -6  -9   6  233.37   14.43   1
  -6  -9   6  249.43   23.42   4
   5  -9  -6  232.89   29.07   3
   5  -9  -6  239.55   16.47   4
  -5  -9   6  225.93   25.01   4
  -5  -9   6  225.96   13.42   1
  -4  -9   6   41.79   15.87   4
   4  -9  -6   17.95   20.94   3
   4  -9  -6    8.51   16.55   4
   3  -9  -6  514.44   45.11   3
  -3  -9   6  494.02   30.60   4
   3  -9  -6  438.37   29.08   4
   2  -9  -6   12.35   13.82   4
  -2  -9   6   16.95   17.16   4
   2  -9  -6    0.58    3.42   3
  -1  -9   6   27.24   17.75   4
   1  -9  -6   25.90   33.31   3
   1  -9  -6   59.21   12.71   4
   0  -9  -6    7.40   20.73   2
   0  -9   6    9.14   14.39   4
   0  -9  -6   -2.75    3.97   4
   0  -9  -6   33.66   25.94   3
  -1  -9  -6  103.57   24.73   4
  -1  -9  -6  107.47   28.82   3
   1  -9   6   88.07   16.71   4
  -1  -9  -6  108.87   20.29   2
  -1  -9  -6  101.78   11.96   1
   2  -9   6   19.98   16.68   4
  -2  -9  -6   28.17   21.44   4
  -2  -9  -6    6.17  106.98   3
  -2  -9  -6   15.86   10.52   1
  -2  -9  -6    2.64   15.51   2
   3  -9   6  248.72   24.59   3
  -3  -9  -6  294.47   27.64   4
  -3  -9  -6  274.64   24.69   2
  -3  -9  -6  239.02   16.82   1
   3  -9   6  252.27   20.05   4
  -3  -9  -6  244.46   30.35   3
   4  -9   6  133.25   19.15   3
  -4  -9  -6  189.71   22.51   2
  -4  -9  -6  159.20   27.12   3
   4  -9   6  176.40   17.98   4
  -4  -9  -6  156.34   15.01   1
  -4  -9  -6  191.88   25.73   4
   5  -9   6  115.91   18.43   4
  -5  -9  -6   91.87   15.82   1
  -5  -9  -6  127.67   26.25   3
  -5  -9  -6  132.78   22.74   2
  -5  -9  -6  168.50   26.10   4
  -6  -9  -6  145.52   22.36   2
   6  -9   6  165.32   19.02   4
  -6  -9  -6  138.13   17.42   1
  -6  -9  -6  196.40   29.38   4
   7  -9   6  232.74   21.87   4
  -7  -9  -6  290.79   32.32   4
  -7  -9  -6  231.10   21.04   1
   8  -9   6  135.80   19.33   4
  -8  -9  -6  112.72   19.96   1
  -9  -9  -6   78.14   21.60   1
   9  -9   6   80.33   19.33   4
 -10  -9  -6    9.55   32.14   1
 -11  -9  -6   17.01   27.77   1
 -12   9  -6    9.65  498.30   2
 -12  -9  -6   38.56   26.02   1
 -16 -10   6    2.35   21.81   1
 -15 -10   6  107.89   33.60   4
 -15 -10   6   28.69   19.43   1
  15 -10  -6   39.34   27.90   3
  14 -10  -6   48.50   27.84   3
 -14 -10   6   58.11   36.86   4
 -14 -10   6   41.07   15.51   1
  13 -10  -6   88.74   27.62   3
 -13 -10   6   56.41   15.53   1
 -13 -10   6  102.63   34.15   4
  12 -10  -6   10.48   21.00   3
 -12 -10   6    7.13  128.18   4
 -12 -10   6    9.29   14.80   1
  11 -10  -6   27.03   22.30   3
 -11 -10   6   -7.77   15.44   4
 -11 -10   6   22.15   14.34   1
 -10 -10   6   -6.05   14.07   4
 -10 -10   6    0.58    8.50   1
  10 -10  -6    8.86   16.78   3
   9 -10  -6   62.94   22.15   3
  -9 -10   6   50.34   11.97   1
  -9 -10   6  106.39   20.32   4
   8 -10  -6  149.76   23.59   3
  -8 -10   6  183.18   22.77   4
  -8 -10   6  140.09   12.64   1
  -7 -10   6  255.16   22.59   4
   7 -10  -6  195.66   28.07   3
  -6 -10   6    5.74   30.57   4
   6 -10  -6    1.64  142.60   3
   5 -10  -6   11.68   30.06   3
   5 -10  -6   -2.94    5.33   4
   4 -10  -6   79.97   14.85   4
  -4 -10   6   90.35   16.43   4
   4 -10  -6  111.42   27.16   3
   3 -10  -6  164.37   15.71   4
  -3 -10   6  145.33   18.22   4
   3 -10  -6  178.54   29.75   3
   2 -10  -6  347.63   24.84   4
  -2 -10   6  381.14   26.74   4
   2 -10  -6  452.72   38.73   3
   1 -10  -6  325.08   34.24   3
  -1 -10   6  282.34   22.71   4
   1 -10  -6  274.42   20.36   4
   0 -10  -6   19.22   31.17   4
   0 -10   6   18.73   18.61   4
   0 -10  -6   22.17   27.05   3
  -1 -10  -6  125.03   23.40   4
   1 -10   6  132.05   17.56   4
  -1 -10  -6  131.81   28.39   3
  -2 -10  -6   91.23   26.80   4
  -2 -10  -6   91.82   23.82   3
  -2 -10  -6   77.03   21.87   2
  -2 -10  -6   87.52   12.49   1
   2 -10   6   74.27   15.89   4
   3 -10   6  163.30   19.19   4
  -3 -10  -6  196.41   22.93   2
  -3 -10  -6  203.67   29.57   3
   3 -10   6  158.95   21.88   3
  -3 -10  -6  177.68   14.95   1
  -3 -10  -6  212.54   26.61   4
  -4 -10  -6  372.64   27.86   2
   4 -10   6  328.24   24.63   4
  -4 -10  -6  372.38   31.66   4
  -4 -10  -6  346.28   21.24   1
   4 -10   6  294.02   29.98   3
  -4 -10  -6  411.50   35.80   3
  -5 -10  -6  283.36   32.18   3
  -5 -10  -6  248.75   28.69   4
  -5 -10  -6  172.30   18.30   1
  -5 -10  -6  190.30   24.06   2
   5 -10   6  231.52   20.64   4
   6 -10   6   21.64   16.04   4
  -6 -10  -6    1.26    4.20   1
  -6 -10  -6   -2.34    7.69   2
  -6 -10  -6   35.48   20.02   4
   7 -10   6   22.99   19.60   4
  -7 -10  -6   72.68   28.02   4
  -7 -10  -6   19.96   14.55   1
  -8 -10  -6   26.81   17.42   1
   8 -10   6   26.51   18.66   4
   9 -10   6  115.94   22.03   4
  -9 -10  -6   89.79   20.29   1
 -10 -10  -6  177.86   25.57   1
  10 -10   6  186.25   24.09   4
  11 -10   6   25.54   17.57   4
 -11 -10  -6   -5.15   16.63   1
 -15 -11   6    7.30   26.26   1
  15 -11  -6   19.31   32.50   3
  14 -11  -6    4.01   19.15   3
 -14 -11   6   44.84   30.48   4
 -14 -11   6   22.45   15.12   1
 -13 -11   6   10.26   20.45   1
  13 -11  -6   15.08   26.17   3
 -13 -11   6   12.15   26.88   4
  12 -11  -6   24.06   22.25   3
 -12 -11   6   39.40   38.24   4
 -11 -11   6  158.64   33.34   4
  11 -11  -6  105.94   27.40   3
  10 -11  -6   27.60   19.86   3
 -10 -11   6    4.09   68.26   4
   9 -11  -6   12.20   17.21   3
  -9 -11   6   34.68   19.81   4
   8 -11  -6   19.32   21.38   3
  -8 -11   6   17.27   23.16   4
  -7 -11   6   16.72   14.07   4
   7 -11  -6   16.61   24.36   3
   6 -11  -6  258.93   30.67   3
  -6 -11   6  276.29   23.73   4
   5 -11  -6  255.51   31.76   3
  -5 -11   6  254.51   24.64   4
   4 -11  -6  287.88   33.55   3
   4 -11  -6  238.98   20.64   4
  -4 -11   6  270.13   23.75   4
   3 -11  -6   -3.05   16.78   3
  -3 -11   6    6.68   14.43   4
   3 -11  -6   -5.92   12.42   4
   2 -11  -6   -9.31   24.62   3
   2 -11  -6    3.54   96.91   4
  -2 -11   6   20.10   17.96   4
   1 -11  -6   88.63   29.07   3
  -1 -11   6   77.26   16.91   4
   1 -11  -6  108.80   15.78   4
   0 -11  -6   49.24   27.01   3
   0 -11  -6   32.26   23.50   4
   0 -11   6   44.99   16.01   4
   1 -11   6  130.47   18.01   4
  -1 -11  -6  160.06   27.79   3
  -1 -11  -6  176.77   23.14   4
  -2 -11  -6   20.31   12.54   1
  -2 -11  -6   18.82   20.69   3
  -2 -11  -6   22.83   21.17   4
   2 -11   6   23.79   16.86   4
  -3 -11  -6    7.57   59.57   4
  -3 -11  -6   -0.47    4.91   1
  -3 -11  -6   12.66   34.48   3
  -4 -11  -6   78.02   24.85   4
   4 -11   6   75.33   18.00   4
  -4 -11  -6   79.37   13.88   1
   4 -11   6   74.42   17.82   3
  -4 -11  -6   87.11   25.71   3
  -5 -11  -6  241.60   24.96   2
   5 -11   6  226.87   21.33   4
  -5 -11  -6  260.25   29.11   4
  -5 -11  -6  238.79   18.81   1
   6 -11   6  143.81   20.13   4
  -6 -11  -6  162.98   28.15   4
  -6 -11  -6  138.71   16.66   1
  -7 -11  -6  176.14   18.62   1
  -7 -11  -6  217.11   32.79   4
   7 -11   6  212.37   22.83   4
   8 -11   6   26.83   20.48   4
  -8 -11  -6   31.57   17.87   1
  -8 -11  -6   39.63   24.48   4
  -9 -11  -6   58.53   19.05   1
   9 -11   6   10.58   19.74   4
 -10 -11  -6   -7.82   19.00   1
  10 -11   6    2.12   86.98   4
 -11 -11  -6   34.38   22.80   1
  14 -12  -6   60.33   31.09   3
  13 -12  -6    9.96   23.04   3
 -13 -12   6   -2.22   11.96   4
  12 -12  -6  132.95   28.54   3
 -12 -12   6  154.04   35.80   4
  11 -12  -6   -4.49   34.29   3
  10 -12  -6   -3.01    8.75   3
   9 -12  -6   35.01   26.50   3
  -9 -12   6   55.42   20.43   4
  -8 -12   6   66.36   21.89   4
   8 -12  -6   81.84   25.65   3
  -7 -12   6   11.24   22.15   4
   7 -12  -6    6.91   41.87   3
   6 -12  -6   70.47   26.01   3
  -6 -12   6   88.02   20.75   4
   5 -12  -6    7.06   25.58   3
  -5 -12   6    1.36   39.30   4
   4 -12  -6   42.81   25.51   3
  -4 -12   6   31.04   25.51   4
  -3 -12   6   31.18   15.81   4
   3 -12  -6    7.57   35.23   3
  -2 -12   6  109.15   18.03   4
   2 -12  -6  112.67   17.13   4
   2 -12  -6  108.67   31.58   3
   1 -12  -6   19.48   12.29   4
   1 -12  -6    6.63   30.29   3
  -1 -12   6    1.69    7.90   4
   0 -12  -6  133.82   28.86   3
   0 -12  -6   98.34   22.79   4
   0 -12   6  116.30   18.58   4
   1 -12   6   23.31   19.94   4
  -1 -12  -6   28.11   32.60   4
  -1 -12  -6   39.50   23.47   3
   2 -12   6   83.79   17.74   4
  -2 -12  -6  109.98   29.19   3
  -2 -12  -6   58.14   25.63   4
  -3 -12  -6   13.92   36.01   3
  -3 -12  -6   15.01   26.03   4
   3 -12   6   18.05   17.21   4
  -4 -12  -6   44.88   26.04   3
   4 -12   6   37.10   18.89   4
  -4 -12  -6   64.22   25.35   4
   5 -12   6   16.40   16.95   4
  -5 -12  -6   10.12   16.76   1
  -5 -12  -6   26.09   23.90   4
  -6 -12  -6   58.37   24.95   4
  -6 -12  -6    4.83  120.97   1
   6 -12   6   37.72   21.10   4
   7 -12   6    1.10    8.47   4
  -7 -12  -6  -10.01   15.74   1
  -7 -12  -6   24.07   19.15   4
  -8 -12  -6   58.35   17.23   1
   8 -12   6   76.39   22.05   4
  -8 -12  -6  124.82   32.52   4
  -9 -12  -6   21.00   17.46   1
   9 -12   6   12.31   18.60   4
 -10 -12  -6   44.18   20.11   1
  13 -13  -6    1.64   23.82   3
  12 -13  -6   62.18   28.88   3
 -12 -13   6   77.35   29.65   4
  11 -13  -6   -6.57   16.35   3
 -10 -13   6   57.51   35.52   4
  10 -13  -6   64.13   26.00   3
  -9 -13   6  144.09   25.36   4
   9 -13  -6   57.79   27.37   3
  -8 -13   6   27.21   20.86   4
   7 -13  -6    7.16   33.21   3
  -7 -13   6   12.71   31.45   4
  -6 -13   6  175.76   24.93   4
   6 -13  -6  173.17   27.99   3
  -5 -13   6   -4.71   27.21   4
   5 -13  -6    6.56   25.39   3
   4 -13  -6  135.45   31.46   3
  -4 -13   6  144.78   24.31   4
   3 -13  -6    6.68   16.51   3
  -3 -13   6   11.94    9.41   4
  -2 -13   6   25.56   16.40   4
   2 -13  -6   27.69   28.22   3
   1 -13  -6   37.57   15.71   4
   1 -13  -6    5.26   13.79   3
  -1 -13   6   55.76   17.39   4
   0 -13  -6  148.26   24.91   4
   0 -13   6  205.51   20.18   4
   0 -13  -6  210.81   32.50   3
  -1 -13  -6    2.85   19.69   3
   1 -13   6    2.23    9.22   4
  -1 -13  -6   13.06   24.54   4
  -2 -13  -6  127.58   30.85   3
   2 -13   6   67.30   19.03   4
  -2 -13  -6   63.32   25.56   4
   3 -13   6   21.11   21.58   4
  -3 -13  -6   30.55   23.57   4
  -3 -13  -6   62.80   27.00   3
   4 -13   6   -1.83   31.81   4
  -4 -13  -6   12.41   40.06   4
  -4 -13  -6   37.98   29.93   3
  -5 -13  -6   14.31   21.37   4
   5 -13   6    7.67   19.97   4
   6 -13   6  197.20   23.88   4
  -6 -13  -6  236.81   31.93   4
  -7 -13  -6   30.45   27.29   4
   7 -13   6   -5.69   15.56   4
  -8 -13  -6  118.20   33.47   4
   8 -13   6   92.79   24.14   4
  11 -14  -6    2.22   17.67   3
  10 -14  -6   45.73   27.00   3
 -10 -14   6   13.64   79.00   4
  -9 -14   6   86.42   24.10   4
   9 -14  -6   42.28   24.44   3
  -8 -14   6  243.52   27.90   4
   8 -14  -6  180.03   30.18   3
   7 -14  -6   -0.88   17.93   3
  -7 -14   6    9.39   21.41   4
  -6 -14   6    5.29   29.60   4
   6 -14  -6    6.99   35.35   3
  -5 -14   6    6.72   47.33   4
   5 -14  -6    8.27   40.72   3
  -4 -14   6    1.36   45.08   4
   4 -14  -6   -3.58   17.19   3
   3 -14  -6    5.99   64.43   3
  -3 -14   6    5.76   22.15   4
  -2 -14   6  257.42   25.26   4
   2 -14  -6  362.46   38.92   3
  -1 -14   6   19.97   23.30   4
   1 -14  -6   42.92   34.45   3
   0 -14   6   46.93   19.55   4
   0 -14  -6   43.16   33.09   3
   1 -14   6   10.39   12.57   4
  -1 -14  -6   21.02   24.47   3
  -2 -14  -6   88.63   31.26   3
   2 -14   6   35.58   21.14   4
  -2 -14  -6   16.52   32.20   4
  -3 -14  -6   19.82   20.36   3
   3 -14   6    3.86   12.98   4
  -3 -14  -6    3.31   61.11   4
  -4 -14  -6  253.90   29.99   4
  -4 -14  -6  323.98   38.65   3
   4 -14   6  211.59   26.04   4
  -5 -14  -6   41.76   24.95   4
   5 -14   6    5.41   21.07   4
  -6 -14  -6   33.78   24.10   4
   6 -14   6   10.16   21.48   4
  -7 -14  -6   37.25   26.05   4
   8 -15  -6   13.17   26.99   3
   7 -15  -6    4.11   46.19   3
  -7 -15   6   -5.76   32.07   4
   6 -15  -6    5.07   27.41   3
  -6 -15   6   34.11   24.79   4
  -5 -15   6   39.08   24.42   4
   5 -15  -6   28.40   31.19   3
  -4 -15   6    7.84   51.92   4
   4 -15  -6    2.58   12.90   3
   3 -15  -6    6.77   23.25   3
  -3 -15   6   -5.02   10.17   4
  -2 -15   6   12.73   21.20   4
   2 -15  -6   17.23   28.78   3
  -1 -15   6   42.62   18.84   4
   1 -15  -6   13.34   43.53   3
   0 -15  -6  117.38   35.13   3
   0 -15   6   91.84   23.30   4
  -1 -15  -6   11.20   27.99   3
   1 -15   6   18.12   21.21   4
   2 -15   6   53.16   22.87   4
  -2 -15  -6   98.35   34.85   3
  -3 -15  -6   23.90   23.60   3
   3 -15   6   -5.58   29.41   4
  -3 -15  -6    5.00   47.07   4
  -4 -15  -6   26.79   24.39   4
   4 -15   6    1.04    6.25   4
  -5 -15  -6   17.38   22.70   4
  -6 -15  -6   51.53   32.17   4
  -3 -16   6   27.63   21.34   4
  -2 -16   6   39.64   31.05   4
  -1 -16   6   16.41   25.52   4
   1 -16  -6   66.74   36.32   3
   0 -16  -6   18.91   32.37   3
 -19   0   7  105.56   22.09   1
  18   0  -7   36.99   47.27   3
 -18   0   7   -8.17   23.59   1
  17   0  -7   74.10   40.10   3
 -17   0   7    4.61   12.80   1
 -16   0   7   -1.46   29.36   1
  16   0  -7   97.72   37.94   3
  15   0  -7  220.00   39.98   3
 -15   0   7  181.76   21.52   1
  14   0  -7  105.10   33.87   3
 -13   0   7  453.31   26.80   1
  13   0  -7  422.88   47.35   3
 -12   0   7   17.12   13.37   1
 -11   0   7   49.85   16.36   1
 -10   0   7   23.32   13.13   1
  -9   0   7  247.51   17.42   1
  -7   0   7  343.94   21.17   4
   7   0  -7  335.95   20.99   2
   6   0  -7   10.55    5.64   2
  -6   0   7   -6.49    5.06   4
   5   0  -7  212.54   18.13   2
  -5   0   7  226.61   13.73   4
   4   0  -7    9.60   11.40   2
  -4   0   7    2.37    3.45   4
   3   0  -7  609.71   35.94   2
  -3   0   7  626.72   34.35   4
   2   0  -7  -11.25   10.67   2
   1   0  -7 3914.04  201.62   2
   1   0  -7 3334.60  269.48   3
   0   0  -7   -7.25   10.81   3
   0   0  -7    9.15   12.30   2
  -1   0  -7  359.20   19.39   1
  -1   0  -7  351.28   27.62   3
  -1   0  -7  352.61   26.76   2
  -2   0  -7   13.03   17.86   2
  -2   0  -7    0.81    2.97   1
  -2   0  -7    0.06    0.49   3
  -3   0  -7  338.60   26.67   2
  -3   0  -7  317.32   17.85   1
  -4   0  -7    3.71    8.71   1
  -4   0  -7   13.73   15.69   2
  -5   0  -7  348.91   20.13   1
  -5   0  -7  367.65   31.29   2
  -6   0  -7    7.27   10.29   1
  -6   0  -7   36.02   19.88   2
  -7   0  -7   37.29   22.25   2
  -7   0  -7   13.89   10.70   1
  -8   0  -7   -5.32   11.45   1
  -8   0  -7    8.47   18.53   2
  -9   0  -7  631.99   44.41   2
  -9   0  -7  660.99   34.23   1
 -10   0  -7   30.99   23.54   2
 -11   0  -7  708.09   36.42   1
 -11   0  -7  635.89   47.74   2
 -12   0  -7   25.74   20.39   2
 -12   0  -7    2.49    9.80   1
 -13   0  -7    7.60   14.87   1
 -14   0  -7    4.49   14.59   1
 -19  -1   7   19.78   24.79   1
 -19   1   7   -9.27   17.58   1
 -18   1   7    5.29   28.19   1
  18   1  -7   96.06   42.77   3
 -18  -1   7    8.02   21.98   1
 -17   1   7   86.98   20.41   1
  17  -1  -7   99.66   51.23   3
 -17  -1   7   80.75   22.83   1
  17   1  -7  160.29   41.73   3
 -16  -1   7    4.49   23.38   1
  16   1  -7  183.40   36.94   3
  16  -1  -7   48.84   35.61   3
 -15  -1   7   32.32   15.87   1
 -15   1   7   53.37   18.66   1
  15  -1  -7   73.09   37.75   3
 -14   1   7   -0.65   11.63   1
 -14  -1   7   20.00   15.30   1
  14  -1  -7   77.34   35.58   3
 -13  -1   7   10.01   21.81   1
  13  -1  -7  104.92   32.59   3
 -13   1   7   -4.41   18.88   1
 -12   1   7   16.50   10.45   1
  12  -1  -7  110.27   33.54   3
 -12  -1   7   -1.55    7.71   1
 -11  -1   7  816.63   41.39   1
 -11   1   7  814.14   41.27   1
  11  -1  -7  761.00   65.83   3
 -10   1   7  152.72   17.92   1
 -10  -1   7  134.63   18.42   1
  10  -1  -7  263.64   31.37   3
   9  -1  -7  969.19   74.54   3
  -9  -1   7  956.78   46.42   1
  -9  -1   7  859.90   52.64   4
  -8  -1   7   18.09   16.81   4
   8  -1  -7  159.55   24.30   3
   7   1  -7   29.67    7.90   2
   7  -1  -7   28.71   12.51   2
   7  -1  -7  106.89   22.62   3
  -7  -1   7   27.57   16.95   4
   6   1  -7   49.76   13.08   2
   6  -1  -7   45.71   11.37   2
  -6  -1   7   78.32    9.73   4
   5   1  -7  524.52   31.74   2
  -5  -1   7  529.96   30.40   4
   5  -1  -7  548.93   31.28   2
   5  -1  -7  532.70   44.42   3
   4  -1  -7    3.90  292.65   2
  -4  -1   7   21.46    7.84   4
   4   1  -7   12.91   14.90   2
   4  -1  -7   64.47   17.98   3
  -3  -1   7  633.62   35.11   4
  -3   1   7  607.29   34.48   4
   3  -1  -7  644.33   37.09   2
   3  -1  -7  610.11   51.34   3
   3   1  -7  651.55   38.01   2
   2   1  -7  391.10   25.09   2
   2  -1  -7  382.26   23.91   2
  -2  -1   7  348.00   21.34   4
   2  -1  -7  371.22   34.76   3
   1   1  -7  432.22   27.67   2
   1  -1  -7  410.14   36.39   3
   1  -1  -7  385.77   27.56   2
   0   1  -7  172.40   18.82   2
   0  -1  -7  112.66   21.30   2
   0  -1  -7  152.43   17.03   3
  -1   1  -7 1146.53   94.69   3
  -1   1  -7 1231.36   61.16   1
  -1  -1  -7 1318.76   61.60   1
  -1   1  -7 1321.15   72.51   2
  -1  -1  -7 1331.65   95.12   3
  -1  -1  -7 1273.24   72.49   2
  -2  -1  -7   71.10   20.25   2
  -2  -1  -7   59.93    9.98   3
  -2   1  -7   81.64   19.26   2
  -2  -1  -7   57.18    9.97   1
  -2   1  -7   54.64    9.15   1
  -3  -1  -7  494.42   33.23   2
  -3   1  -7  482.81   24.24   1
  -3  -1  -7  460.34   24.57   1
  -3   1  -7  460.99   33.37   2
  -4  -1  -7  304.43   27.55   2
  -4   1  -7  256.57   16.18   1
  -4  -1  -7  274.30   16.95   1
  -4   1  -7  278.79   26.43   2
  -5   1  -7  210.67   24.86   2
  -5  -1  -7  217.22   15.66   1
  -5   1  -7  207.39   14.09   1
  -5  -1  -7  207.70   27.07   2
  -6  -1  -7   53.12   29.39   2
  -6   1  -7   58.89   10.36   1
  -6   1  -7   31.36   25.81   2
  -6  -1  -7   52.67   12.63   1
  -7   1  -7  697.09   35.03   1
  -7  -1  -7  675.44   35.42   1
  -7  -1  -7  693.44   45.65   2
  -7   1  -7  685.07   45.88   2
  -8  -1  -7   24.30   11.88   1
  -8   1  -7   25.17   10.65   1
  -8   1  -7   73.73   23.80   2
  -8  -1  -7   56.05   29.17   2
  -9   1  -7   96.19   27.34   2
  -9  -1  -7   51.88   13.23   1
  -9   1  -7   57.32   12.13   1
  -9  -1  -7   58.51   26.35   2
 -10  -1  -7   35.26   28.18   2
 -10  -1  -7   -1.38    8.70   1
 -10   1  -7   20.01   22.07   2
 -11   1  -7   73.89   26.93   2
 -11  -1  -7   73.98   15.47   1
 -11  -1  -7   58.99   31.73   2
 -11   1  -7   48.72   14.66   1
 -12   1  -7   13.90   17.09   1
 -12  -1  -7   10.03   24.16   1
 -12   1  -7   39.47   23.65   2
 -13  -1  -7   83.80   17.96   1
 -13   1  -7  131.40   18.45   1
 -14  -1  -7    3.47   13.73   1
 -14   1  -7    4.44   24.69   1
 -15   1  -7    9.84   19.64   1
 -19   2   7   47.33   24.08   1
  18   2  -7  135.86   41.07   3
 -18   2   7   17.36   26.36   1
 -18  -2   7   28.22   18.14   1
 -17  -2   7   81.15   23.19   1
  17  -2  -7   -6.63   31.59   3
 -17   2   7   76.18   20.38   1
 -16   2   7   -2.85   65.91   1
 -16  -2   7   18.26   20.30   1
 -15  -2   7   87.17   18.86   1
  15  -2  -7   39.59   46.28   3
 -15   2   7   44.72   18.88   1
 -14   2   7  228.84   20.77   1
  14  -2  -7  214.29   47.86   3
 -14  -2   7  233.69   21.32   1
  13  -2  -7  356.30   51.80   3
 -13   2   7  418.34   24.97   1
 -13  -2   7  408.88   24.98   1
 -12   2   7   40.82   15.71   1
  12  -2  -7   94.93   36.43   3
 -12  -2   7   42.66   15.80   1
 -11   2   7  403.24   24.69   1
  11  -2  -7  381.45   48.94   3
 -11  -2   7  425.10   26.38   1
 -11  -2   7  433.59   32.28   4
 -10   2   7  100.46   15.44   1
 -10  -2   7  115.77   20.18   4
  10  -2  -7  136.38   36.66   3
 -10  -2   7  111.10   18.30   1
   9  -2  -7   87.92   31.22   3
  -9  -2   7   22.94   17.10   4
  -8  -2   7  276.50   18.14   1
   8  -2  -7  295.30   33.91   3
  -8  -2   7  249.21   24.14   4
   7  -2  -7  555.28   33.70   2
  -7  -2   7  612.68   33.73   4
   7   2  -7  535.81   32.29   2
   7  -2  -7  614.83   50.69   3
   6  -2  -7    9.25    9.15   2
   6   2  -7    9.14    8.36   2
   6  -2  -7   11.37   31.74   3
   5  -2  -7   24.27   11.62   2
   5  -2  -7   26.44   24.23   3
   4  -2  -7   84.57   12.02   2
  -4  -2   7   69.57    9.62   4
   4   2  -7   70.72   16.49   2
   4  -2  -7   51.64   36.46   3
  -3  -2   7  546.93   30.87   4
   3  -2  -7  523.62   47.63   3
   3  -2  -7  552.76   33.74   2
   3   2  -7  538.58   33.87   2
   2   2  -7  634.64   38.49   2
   2  -2  -7  642.42   48.68   3
  -2  -2   7  596.57   35.21   4
   2  -2  -7  631.13   37.39   2
   1  -2  -7 1053.99   77.59   3
   1   2  -7 1029.13   58.87   2
   1  -2  -7  978.77   58.21   2
   0   2  -7  726.59   42.99   2
   0  -2  -7  676.42   42.75   2
   0  -2  -7  763.47   55.75   3
  -1   2  -7  529.49   32.71   2
  -1  -2  -7  496.44   38.07   3
  -1  -2  -7  436.76   32.62   2
  -1  -2  -7  492.33   25.31   1
  -2  -2  -7   71.23   21.49   2
  -2   2  -7  125.22    9.72   1
  -2  -2  -7   98.17   11.31   1
  -2   2  -7  103.83   19.74   2
  -2  -2  -7  112.37   14.26   3
  -3  -2  -7  477.53   38.61   2
  -3   2  -7  545.30   35.53   2
  -3  -2  -7  587.56   42.19   3
  -3   2  -7  549.99   27.58   1
  -3  -2  -7  537.42   28.37   1
  -4   2  -7  158.65   11.49   1
  -4   2  -7  137.95   21.47   2
  -4  -2  -7  153.70   13.79   1
  -4  -2  -7  129.54   30.61   2
  -5   2  -7   44.88   23.74   2
  -5   2  -7   24.43    8.87   1
  -5  -2  -7   34.31   11.62   1
  -5  -2  -7   -4.45   16.50   2
  -6  -2  -7   13.47   15.58   1
  -6   2  -7   21.16   11.45   1
  -6  -2  -7   18.15   66.89   2
  -6   2  -7   19.83   18.93   2
  -7   2  -7  222.38   26.79   2
  -7   2  -7  187.19   14.30   1
  -7  -2  -7  224.37   16.20   1
  -7  -2  -7  255.42   30.20   2
  -8   2  -7  115.04   11.68   1
  -8  -2  -7  124.70   30.51   2
  -8   2  -7  151.89   27.65   2
  -8  -2  -7  104.06   13.58   1
  -9  -2  -7  413.12   22.67   1
  -9  -2  -7  397.61   38.13   2
  -9   2  -7  353.78   21.41   1
  -9   2  -7  335.03   34.42   2
 -10  -2  -7  221.62   20.04   1
 -10   2  -7  274.90   32.28   2
 -10   2  -7  282.37   17.55   1
 -10  -2  -7  303.77   33.68   2
 -11   2  -7   54.11   26.24   2
 -11   2  -7   74.84   14.58   1
 -11  -2  -7   19.55   55.55   2
 -11  -2  -7   56.29   16.76   1
 -12   2  -7   48.80   16.25   1
 -12  -2  -7   53.05   17.20   1
 -12   2  -7   78.31   30.46   2
 -13   2  -7   34.92   28.38   2
 -13  -2  -7    3.02   73.92   1
 -14  -2  -7    2.42    9.80   1
 -15   2  -7   76.68   23.12   1
 -19   3   7   21.98   20.65   1
 -18  -3   7   38.52   19.89   1
 -18   3   7    4.18   29.14   1
 -17   3   7    1.66    8.59   1
 -17  -3   7   21.17   18.10   1
 -16   3   7    5.09   16.28   1
 -16  -3   7    8.74   14.10   1
  15  -3  -7   89.28   52.58   3
 -15   3   7  152.90   18.96   1
 -15  -3   7  151.22   20.23   1
 -14   3   7   23.98   13.96   1
 -14  -3   7   10.49   14.38   1
  13  -3  -7   -5.10   17.14   3
 -13   3   7   42.11   16.31   1
 -13  -3   7   16.30   19.48   1
 -12   3   7  239.90   17.96   1
 -12  -3   7  188.11   19.60   1
  12  -3  -7  135.40   52.03   3
 -12  -3   7  222.01   25.76   4
  11  -3  -7  392.06   58.81   3
 -11  -3   7  460.87   27.12   1
 -11  -3   7  427.34   33.88   4
 -11   3   7  463.54   25.67   1
  10  -3  -7  899.02   78.90   3
 -10   3   7  911.83   45.64   1
 -10  -3   7  883.17   46.05   1
 -10  -3   7  929.64   55.50   4
  -9  -3   7  574.90   38.34   4
  -9  -3   7  550.25   30.34   1
   9  -3  -7  517.46   57.31   3
  -8  -3   7    4.13    9.24   1
   7   3  -7    5.36   32.05   2
  -7  -3   7   29.81   14.17   4
   6   3  -7  407.74   26.36   2
   6  -3  -7  435.27   27.27   2
   6  -3  -7  441.18   46.92   3
  -6  -3   7  440.14   26.86   4
   5  -3  -7  527.39   50.82   3
   5  -3  -7  590.43   33.88   2
  -5  -3   7  550.98   32.07   4
   5   3  -7  563.11   33.75   2
   4  -3  -7 1243.40   96.44   3
   4   3  -7 1315.61   71.74   2
  -4  -3   7 1245.78   70.15   4
   4  -3  -7 1265.86   71.79   2
   3  -3  -7  358.18   31.24   3
  -3  -3   7  356.64   22.31   4
   3   3  -7  357.50   25.37   2
   3  -3  -7  361.82   23.32   2
  -2  -3   7    3.18   21.67   4
   2  -3  -7  137.94   16.46   2
   1  -3  -7  582.62   36.54   2
   1   3  -7  645.75   36.70   2
  -1  -3   7  526.77   33.40   4
   1  -3  -7  623.15   47.12   3
   0  -3  -7  747.05   47.49   2
   0  -3  -7  828.35   61.65   3
   0   3  -7  820.84   47.35   2
   0  -3  -7  815.15   39.95   1
  -1  -3  -7  999.84   60.96   2
  -1  -3  -7 1089.29   80.60   3
  -1   3  -7 1101.09   61.24   2
  -1  -3  -7 1057.65   52.19   1
  -2   3  -7  877.20   52.55   2
  -2  -3  -7  939.90   67.66   3
  -2  -3  -7  907.16   44.29   1
  -2  -3  -7  807.46   51.40   2
  -3   3  -7   81.05   21.38   2
  -3  -3  -7   67.96   13.64   1
  -3  -3  -7   73.93   15.35   3
  -3  -3  -7   90.31   18.82   2
  -3   3  -7   66.84    8.04   1
  -4  -3  -7   12.20   12.81   2
  -4   3  -7   17.49   22.99   2
  -4   3  -7    0.09    2.67   1
  -4  -3  -7    9.29   11.79   1
  -5   3  -7   15.32   24.00   2
  -5  -3  -7    1.69    5.78   2
  -5   3  -7   20.08    7.70   1
  -5  -3  -7   33.05   16.42   1
  -6  -3  -7   97.60   17.24   1
  -6   3  -7   70.36   26.37   2
  -6   3  -7  102.99   10.07   1
  -6  -3  -7   70.19   40.47   2
  -7   3  -7  532.08   38.77   2
  -7  -3  -7  594.47   30.45   1
  -7  -3  -7  569.55   42.44   2
  -7   3  -7  528.64   28.28   1
  -8   3  -7  932.86   46.72   1
  -8  -3  -7 1016.65   59.68   2
  -8   3  -7  895.63   58.29   2
  -8  -3  -7  930.13   48.43   1
  -9  -3  -7   36.91   35.67   2
  -9   3  -7   55.80   27.32   2
  -9   3  -7   43.03   10.82   1
  -9  -3  -7   54.38   16.21   1
 -10  -3  -7   16.63   12.47   1
 -10   3  -7    4.65   12.15   1
 -10   3  -7   13.82   34.34   2
 -11   3  -7   92.41   28.79   2
 -11   3  -7   63.85   15.08   1
 -11  -3  -7   59.74   17.03   1
 -12   3  -7   66.62   32.07   2
 -12   3  -7   45.39   16.97   1
 -12  -3  -7   62.18   21.70   1
 -13   3  -7  172.72   20.07   1
 -13  -3  -7  135.32   22.71   1
 -13   3  -7  122.83   33.93   2
 -14  -3  -7   77.71   20.29   1
 -19   4   7   66.22   24.06   1
 -18  -4   7   62.51   21.26   1
 -18   4   7   67.73   21.85   1
 -17   4   7   16.88   17.47   1
  17  -4  -7   52.95   35.56   3
 -17  -4   7   34.41   22.51   1
 -16  -4   7   40.39   19.55   1
 -16   4   7   33.14   18.13   1
  16  -4  -7   71.83   32.79   3
 -15   4   7  122.51   19.48   1
 -15  -4   7  112.46   19.81   1
  15  -4  -7   90.89   42.71   3
 -14  -4   7   98.65   19.06   1
  14  -4  -7   20.96   90.25   3
 -14   4   7   83.99   18.67   1
 -13  -4   7   36.16   18.07   1
 -13   4   7   49.40   15.55   1
 -13  -4   7   97.42   25.32   4
 -12  -4   7  614.35   33.37   1
  12  -4  -7  479.37   65.31   3
 -12   4   7  630.81   32.76   1
 -12  -4   7  644.57   41.81   4
 -11   4   7   36.36   13.34   1
 -11  -4   7   53.32   24.41   4
 -11  -4   7   48.15   15.69   1
 -10  -4   7   -0.85    2.52   4
 -10   4   7    8.00   11.05   1
 -10  -4   7    8.73   15.70   1
  -9  -4   7 1751.19   96.33   4
   9  -4  -7 1665.81  134.77   3
  -9  -4   7 1694.88   83.20   1
   8  -4  -7   65.62   60.73   3
  -8  -4   7  179.26   19.29   4
  -8  -4   7  160.88   15.49   1
   7  -4  -7  737.55   42.88   4
   7  -4  -7  846.15   62.71   3
   7   4  -7  709.66   43.69   2
  -7  -4   7  781.66   44.97   4
  -7  -4   7  880.27   39.33   1
   6   4  -7  229.71   17.46   2
  -6  -4   7  244.82   18.83   4
   6  -4  -7  234.05   18.42   2
   6  -4  -7  183.40   11.55   4
   6  -4  -7  275.18   25.52   3
   5  -4  -7   63.90   15.90   2
   5  -4  -7   93.62   21.50   3
  -5  -4   7   81.85   11.99   4
   5   4  -7   81.29   14.97   2
   4   4  -7  291.22   21.25   2
   4  -4  -7  237.48   15.01   4
  -4  -4   7  309.55   18.22   4
   4  -4  -7  290.55   28.60   3
   4  -4  -7  299.29   20.75   2
   3  -4  -7   94.39   23.35   3
  -3  -4   7  108.41   12.70   4
   3  -4  -7  110.35   14.52   2
   3  -4  -7  109.47    8.72   4
   3   4  -7   99.08   16.41   2
   2   4  -7 1233.37   69.66   2
  -2  -4   7 1218.71   68.21   4
   2  -4  -7 1186.90   69.67   2
   2  -4  -7 1264.66   93.62   3
  -1  -4   7  681.81   38.32   4
   1  -4  -7  704.61   52.70   3
   1   4  -7  660.11   40.62   2
   1  -4  -7  623.02   41.33   2
   0  -4   7  450.65   28.16   4
   0   4  -7  490.45   31.91   2
   0  -4  -7  472.89   31.78   2
   0  -4  -7  480.19   38.82   3
   0  -4  -7  485.89   25.02   1
  -1  -4  -7  108.30   18.07   3
  -1   4  -7   96.86   23.09   2
  -1  -4  -7  138.19   13.73   1
  -1  -4  -7  103.22   21.57   2
  -2   4  -7   93.11   23.25   2
  -2  -4  -7   82.44   19.50   2
  -2  -4  -7   77.62   12.63   1
  -2  -4  -7   79.90   19.84   3
  -3  -4  -7  356.61   21.60   1
  -3  -4  -7  404.69   30.30   2
  -3  -4  -7  379.92   32.07   3
  -3   4  -7  372.22   19.42   1
  -3   4  -7  392.37   31.79   2
  -4   4  -7  156.10   10.87   1
  -4  -4  -7  173.91   20.41   3
  -4  -4  -7  165.89   17.89   1
  -4   4  -7  152.88   28.56   2
  -4  -4  -7  179.41   26.41   2
  -5   4  -7 2106.17  105.77   1
  -5   4  -7 2256.22  125.69   2
  -5  -4  -7 2273.88  107.53   1
  -5  -4  -7 2223.11  125.42   2
  -6   4  -7   68.35    8.76   1
  -6  -4  -7  100.85   15.46   1
  -6   4  -7   76.48   29.90   2
  -6  -4  -7  117.42   22.88   2
  -7   4  -7    8.20    6.90   1
  -7  -4  -7    1.60    4.65   1
  -7  -4  -7   55.49   19.58   2
  -8   4  -7  105.41   28.21   2
  -8  -4  -7   77.81   17.39   1
  -8   4  -7  104.60   11.48   1
  -8  -4  -7  118.82   25.59   2
  -9   4  -7    8.96   12.65   1
  -9  -4  -7   -1.85    6.48   1
  -9  -4  -7   50.65   22.44   2
 -10   4  -7  330.71   19.49   1
 -10   4  -7  289.86   34.56   2
 -10  -4  -7  273.78   29.94   2
 -10  -4  -7  320.20   23.39   1
 -11   4  -7  177.17   17.39   1
 -11  -4  -7  137.83   21.89   1
 -11   4  -7  158.79   31.27   2
 -12  -4  -7  156.87   24.01   1
 -12   4  -7  173.99   35.76   2
 -13   4  -7   30.62   38.26   2
 -13  -4  -7   21.57   24.21   1
 -14   4  -7   11.32   37.62   2
 -18  -5   7   24.01   26.51   1
 -18   5   7   17.76   20.61   1
  17  -5  -7   43.73   37.08   3
 -17   5   7   18.72   17.57   1
 -17  -5   7   29.41   24.29   1
 -16  -5   7  224.95   23.26   1
  16  -5  -7  188.51   38.88   3
 -16   5   7  216.77   22.89   1
 -15  -5   7  140.38   21.19   1
 -15   5   7  200.86   20.49   1
  15  -5  -7  186.72   37.11   3
 -14  -5   7  174.28   27.76   4
  14  -5  -7  158.32   33.15   3
 -14   5   7  102.60   18.45   1
 -14  -5   7  119.75   20.07   1
 -13   5   7   15.35   15.01   1
  13  -5  -7   66.60   28.95   3
 -13  -5   7    8.90   12.93   1
 -13  -5   7   55.42   23.39   4
 -12  -5   7   25.53   24.26   4
 -12   5   7   19.89   15.65   1
 -12  -5   7   27.83   14.79   1
  12  -5  -7   67.51   30.63   3
 -11  -5   7  145.24   17.25   1
 -11  -5   7  153.70   29.17   4
  11  -5  -7  161.11   28.97   3
 -11   5   7  121.23   14.84   1
 -10   5   7  296.31   19.23   1
 -10  -5   7  335.01   35.00   4
 -10  -5   7  329.92   21.07   1
  10  -5  -7  338.92   37.29   3
   9  -5  -7   95.32   27.04   3
  -9  -5   7   37.45   14.50   1
  -8  -5   7  278.69   18.31   1
   8  -5  -7  231.61   16.11   4
   8  -5  -7  282.34   32.61   3
  -8  -5   7  280.35   22.99   4
  -7  -5   7  110.45   12.87   1
   7  -5  -7   68.92    7.71   4
   7  -5  -7  118.79   28.30   3
  -7  -5   7  104.49   18.94   4
   7   5  -7   80.49   12.46   2
  -6  -5   7  125.53   18.62   4
   6  -5  -7  118.41    8.45   4
   6   5  -7  139.90   16.54   2
   6  -5  -7  164.78   27.17   3
  -6  -5   7  157.19   12.63   1
   5  -5  -7  449.02   28.08   2
   5  -5  -7  499.31   40.35   3
   5  -5  -7  400.85   23.96   4
   5   5  -7  409.69   28.02   2
  -5  -5   7  445.61   27.21   4
   4  -5  -7  197.03   20.06   2
   4  -5  -7  202.20   14.06   4
  -4  -5   7  214.89   16.89   4
   4  -5  -7  249.51   30.37   3
   4   5  -7  238.32   20.04   2
   3  -5  -7  180.28   15.03   4
   3  -5  -7  159.05   26.35   3
   3  -5  -7  159.10   18.23   2
  -3  -5   7  173.15   16.78   4
   3   5  -7  141.96   19.42   2
   2  -5  -7  506.34   33.28   2
   2   5  -7  505.77   34.89   2
   2  -5  -7  549.87   44.34   3
   2  -5  -7  586.87   31.77   4
  -2  -5   7  520.01   31.62   4
  -1  -5   7   11.25   11.54   4
   1  -5  -7   15.32   12.00   2
   1  -5  -7   32.09   13.79   4
   1  -5  -7   20.09   16.91   3
   0  -5  -7  162.67   18.72   4
   0  -5  -7  115.38   21.24   3
   0  -5   7  119.66   14.78   4
   0  -5  -7  137.21   18.05   2
  -1  -5  -7  159.64   27.16   2
  -1  -5  -7  181.17   25.31   3
   1  -5   7  197.65   17.24   4
  -1  -5  -7  176.77   15.94   1
  -1  -5  -7  278.59   21.81   4
  -2  -5  -7   43.73   35.82   2
  -2  -5  -7   62.33   13.84   1
  -2   5  -7   22.63   84.35   2
  -2  -5  -7   47.96   22.58   3
  -3   5  -7   33.31   42.98   2
  -3  -5  -7   54.70   14.26   1
  -3  -5  -7   53.33   30.82   2
  -3  -5  -7   53.23   20.34   3
  -4  -5  -7  125.56   20.97   3
  -4  -5  -7  118.14   17.40   1
  -4  -5  -7  122.59   28.28   2
  -4   5  -7  103.82   30.02   2
  -4   5  -7   99.47    9.29   1
  -5   5  -7   30.51    8.36   1
  -5  -5  -7   41.80   20.38   1
  -5   5  -7   11.01   48.91   2
  -5  -5  -7   38.98   22.06   2
  -6  -5  -7  128.50   17.47   1
  -6   5  -7  125.89   30.00   2
  -6  -5  -7  174.13   25.35   2
  -6   5  -7  114.61    9.83   1
  -7  -5  -7   83.56   18.00   1
  -7   5  -7   65.65    8.79   1
  -7  -5  -7   93.20   24.18   2
  -7   5  -7   50.62   29.76   2
  -8  -5  -7   15.20   17.40   1
  -8  -5  -7   17.34   20.63   2
  -8   5  -7    7.49   13.35   1
  -8   5  -7   20.79   26.69   2
  -9  -5  -7   19.57   16.46   2
  -9  -5  -7   21.61   17.48   1
  -9   5  -7    1.85   12.42   2
 -10  -5  -7    4.68   11.22   1
 -10   5  -7   16.30   40.25   2
 -11  -5  -7    2.97  176.37   1
 -11   5  -7   23.08   29.48   2
 -12  -5  -7  171.93   24.88   1
 -12   5  -7  206.60   36.80   2
 -13   5  -7   81.46   36.98   2
 -13  -5  -7   53.91   21.02   1
 -14   5  -7   31.99   39.70   2
  17  -6  -7   33.91   37.37   3
 -17  -6   7   28.50   28.04   1
  16  -6  -7   -3.87   50.38   3
 -16  -6   7   17.47   17.18   1
 -15  -6   7    7.34   13.86   1
 -15   6   7   14.22   18.46   1
  15  -6  -7   18.55   43.81   3
 -15  -6   7   78.18   28.28   4
 -14   6   7  213.90   19.99   1
 -14  -6   7  206.65   21.28   1
  14  -6  -7  150.54   36.78   3
 -14  -6   7  249.19   33.39   4
 -13  -6   7   35.98   18.48   1
 -13  -6   7   38.19   26.04   4
 -13   6   7   28.40   15.10   1
  13  -6  -7   77.49   29.96   3
 -12  -6   7   92.37   17.87   1
  12  -6  -7  153.62   31.97   3
 -12  -6   7  128.07   32.58   4
 -12   6   7  131.31   16.27   1
  11  -6  -7   43.34   29.93   3
 -11   6   7   30.23   12.02   1
 -11  -6   7   31.85   13.47   1
 -11  -6   7   33.04   34.31   4
 -10   6   7   27.62   13.15   1
  10  -6  -7   41.47   26.38   3
 -10  -6   7   48.92   14.76   1
 -10  -6   7   20.79   30.99   4
   9  -6  -7   33.91   29.47   3
  -9  -6   7   43.37   13.30   1
  -9  -6   7   70.89   17.75   4
   8  -6  -7  952.91   77.24   3
  -8  -6   7 1000.27   48.17   1
  -8  -6   7  936.83   56.11   4
   7  -6  -7  149.50   32.02   3
  -7  -6   7  188.72   13.70   1
  -7  -6   7  177.96   22.20   4
   7  -6  -7  141.92   11.55   4
   6  -6  -7  221.61   36.04   3
  -6  -6   7  251.66   22.14   4
   6  -6  -7  232.12   14.78   4
   6   6  -7  219.07   19.79   2
  -6  -6   7  280.70   15.82   1
   5  -6  -7  151.68   29.42   3
   5  -6  -7  131.27   12.00   4
   5   6  -7  150.27   19.38   2
   5  -6  -7  163.35   21.01   2
  -5  -6   7  194.95   17.47   4
  -5  -6   7  187.00   12.29   1
  -4  -6   7   -1.06    3.77   1
   4  -6  -7    9.00    6.31   4
  -4  -6   7   21.13   13.52   4
   3  -6  -7  103.19   16.80   4
   3  -6  -7  139.26   20.31   2
  -3  -6   7  159.17   16.05   4
   3  -6  -7  185.45   23.18   3
   2  -6  -7 1377.90   72.29   4
   2  -6  -7 1232.62   74.43   2
   2  -6  -7 1257.55   99.67   3
  -2  -6   7 1322.48   72.76   4
   1  -6  -7  164.72   19.50   4
   1  -6  -7  115.04   19.97   2
   1  -6  -7  147.55   24.98   3
  -1  -6   7  141.78   17.50   4
   0  -6  -7  162.34   21.72   4
   0  -6   7  123.27   16.86   4
   0  -6  -7  124.35   24.31   3
   0  -6  -7  155.37   20.82   2
  -1  -6  -7  310.43   24.89   4
  -1  -6  -7  233.36   29.47   3
  -1  -6  -7  244.08   23.53   2
   1  -6   7  219.49   19.54   4
  -1  -6  -7  246.14   18.05   1
  -2  -6  -7  444.17   27.02   1
  -2  -6  -7  534.23   35.86   4
  -2  -6  -7  517.76   34.22   2
   2  -6   7  484.09   30.38   4
  -2  -6  -7  493.46   42.46   3
  -3  -6  -7  224.97   28.57   3
  -3  -6  -7  240.37   18.09   1
  -3  -6  -7  232.92   31.00   2
  -4  -6  -7 1155.42   58.30   1
  -4  -6  -7 1206.18   70.97   2
  -4  -6  -7 1147.01   89.78   3
  -5  -6  -7   18.94   14.47   1
  -5  -6  -7   13.70   43.37   2
  -6  -6  -7  832.75   44.74   1
  -6  -6  -7  853.31   53.32   2
  -6   6  -7  898.27   55.13   2
  -7  -6  -7   90.37   16.87   1
  -7   6  -7   61.75   39.47   2
  -7  -6  -7  103.68   31.00   2
  -8  -6  -7   83.16   20.11   1
  -8   6  -7   87.66   34.45   2
  -8  -6  -7   63.99   26.56   2
  -9  -6  -7    6.53   10.54   1
 -10  -6  -7  321.62   26.45   1
 -10   6  -7  341.28   37.00   2
 -11   6  -7   47.77   37.64   2
 -11  -6  -7   32.00   23.94   1
 -12  -6  -7   28.70   21.92   1
 -12   6  -7   29.49   39.78   2
 -13  -6  -7    8.86   90.34   1
 -13   6  -7    6.36   24.86   2
 -14   6  -7   38.42   46.11   2
 -17  -7   7   12.70   26.50   1
  17  -7  -7    8.90   77.66   3
  16  -7  -7  148.26   42.26   3
 -16  -7   7  201.41   23.62   1
 -15  -7   7   50.40   28.38   4
 -15  -7   7   -0.83   11.85   1
  15  -7  -7   -5.17   20.43   3
 -14  -7   7   33.24   23.06   4
  14  -7  -7   14.69   28.85   3
 -13  -7   7   29.03   29.62   4
 -13   7   7    9.88   16.67   1
  13  -7  -7   -4.55   94.13   3
 -13  -7   7   17.12   13.53   1
 -12  -7   7  198.18   17.99   1
 -12  -7   7  213.52   30.20   4
 -12   7   7  205.42   17.38   1
  12  -7  -7  163.68   35.53   3
 -11  -7   7   -7.23   16.26   1
 -11  -7   7    9.03   26.84   4
  11  -7  -7   19.17   25.32   3
 -11   7   7    3.44   14.55   1
 -10   7   7  341.43   19.05   1
 -10  -7   7  258.34   32.12   4
 -10  -7   7  302.83   19.53   1
  10  -7  -7  303.78   37.43   3
  -9  -7   7   30.76   13.25   4
   9  -7  -7   -4.81   15.46   3
  -9  -7   7   16.70    9.75   1
  -8  -7   7   14.29   10.78   1
   8  -7  -7   -3.30   40.15   3
  -8  -7   7   20.48   15.06   4
   7  -7  -7   42.00   37.49   3
  -7  -7   7   78.44   11.49   1
  -7  -7   7   43.85   25.10   4
   6   7  -7  227.72   21.89   2
   6  -7  -7  250.92   15.94   4
   6  -7  -7  231.04   35.42   3
  -6  -7   7  245.42   26.57   4
  -6  -7   7  281.04   15.83   1
  -5  -7   7   37.01   16.12   4
  -5  -7   7   15.06    9.21   1
   5  -7  -7    4.11   32.31   4
  -4  -7   7  625.36   37.19   4
  -4  -7   7  654.80   30.86   1
   4  -7  -7  594.52   38.90   2
   4  -7  -7  669.61   52.62   3
   4  -7  -7  574.29   35.04   4
   3  -7  -7   81.05   11.08   4
   3  -7  -7   55.08   20.50   2
  -3  -7   7   48.86   18.18   4
   3  -7  -7   68.14   25.88   3
  -3  -7   7   66.49    8.31   1
  -2  -7   7   38.78   16.54   4
   2  -7  -7   32.95   19.99   2
   2  -7  -7    8.03   29.29   4
   2  -7  -7   40.72   24.98   3
  -1  -7   7   52.94   18.50   4
   1  -7  -7   39.56   21.81   2
   1  -7  -7   48.08   22.92   4
   1  -7  -7   82.02   24.37   3
   0  -7   7  504.08   33.17   4
   0  -7  -7  578.86   36.15   4
   0  -7  -7  500.36   35.38   2
   0  -7  -7  535.67   45.60   3
  -1  -7  -7   24.43   15.46   1
   1  -7   7   12.92   15.89   4
  -1  -7  -7   42.66   18.25   4
  -1  -7  -7   12.16   16.39   2
  -2  -7  -7 1803.42   91.71   1
  -2  -7  -7 1897.36  105.63   4
  -2  -7  -7 1802.95  143.53   3
   2  -7   7 1972.22  105.36   4
  -2  -7  -7 1977.64  108.02   2
  -3  -7  -7  102.20   23.17   4
  -3  -7  -7   59.62   25.32   3
  -3  -7  -7   46.30   12.95   1
   3  -7   7   59.01   16.99   4
  -3  -7  -7   69.35   19.33   2
  -4  -7  -7   18.02   12.54   1
  -4  -7  -7   58.76   17.37   2
   4  -7   7   47.09   14.89   4
  -4  -7  -7   25.99   17.78   3
  -4  -7  -7   64.01   21.96   4
  -5  -7  -7   20.83   21.62   3
  -5  -7  -7    2.63   12.83   1
  -5  -7  -7   21.00   15.79   2
  -6  -7  -7  457.28   32.69   2
  -6  -7  -7  438.30   26.64   1
  -7   7  -7   14.58   67.53   2
  -7  -7  -7   38.01   20.78   2
  -7  -7  -7   19.51   17.72   1
  -8  -7  -7  662.99   44.09   2
  -8  -7  -7  695.08   38.27   1
  -8   7  -7  674.15   49.13   2
  -9   7  -7   -2.85   52.54   2
  -9  -7  -7    6.16  100.71   1
 -10  -7  -7   45.57   23.05   1
 -10   7  -7   15.93   47.03   2
 -11  -7  -7   19.44   27.12   1
 -11   7  -7   43.92   46.63   2
 -12  -7  -7  175.07   31.21   1
 -12   7  -7  162.95   39.85   2
 -13   7  -7   25.69   40.75   2
 -17  -8   7   17.85   21.94   1
  16  -8  -7   -4.37   31.16   3
 -16  -8   7   18.22   17.62   1
 -16  -8   7   55.20   36.21   4
 -15  -8   7   42.16   26.85   4
 -14  -8   7   18.16   18.69   1
 -14  -8   7   55.71   37.22   4
  14  -8  -7   15.00   40.06   3
 -13  -8   7   44.27   28.90   4
 -13  -8   7   10.19   16.72   1
  13  -8  -7   -1.28    8.92   3
 -12  -8   7  163.81   16.04   1
 -12  -8   7  175.81   32.92   4
  12  -8  -7   93.01   31.46   3
 -11  -8   7   48.59   13.57   1
 -11  -8   7   25.15   34.28   4
  11  -8  -7   20.20   32.38   3
 -10  -8   7   75.54   32.03   4
 -10   8   7   79.10   14.21   1
 -10  -8   7   73.68   13.62   1
  10  -8  -7   75.83   29.35   3
  -9  -8   7   24.75   15.52   4
  -9  -8   7   11.73   14.95   1
   8  -8  -7  312.62   34.98   3
  -8  -8   7  322.16   25.10   4
  -8  -8   7  284.17   17.49   1
   7  -8  -7   10.73   27.82   3
  -7  -8   7   22.20   21.07   4
  -7  -8   7   24.28    9.51   1
  -6  -8   7  328.54   27.46   4
   6  -8  -7  363.57   33.98   3
  -6  -8   7  359.58   19.12   1
  -5  -8   7   21.95    8.58   1
   5  -8  -7   17.16   12.95   4
   5  -8  -7   37.36   24.86   3
  -5  -8   7   48.15   16.89   4
  -4  -8   7    9.61    6.48   1
  -4  -8   7   12.56   11.03   4
   4  -8  -7   11.46   10.86   4
   4  -8  -7   19.04   27.00   3
   3  -8  -7   -4.64    7.01   2
  -3  -8   7   10.43   21.01   4
   3  -8  -7   19.51   32.82   3
  -3  -8   7   18.48    6.82   1
   3  -8  -7   37.90   10.77   4
   2  -8  -7  103.78   20.54   4
   2  -8  -7  127.84   23.55   2
   2  -8  -7  191.93   28.84   3
  -2  -8   7  144.91   20.51   4
   1  -8  -7   10.77   41.16   4
  -1  -8   7   11.13   23.41   4
   1  -8  -7   31.50   28.69   3
   1  -8  -7   -3.56    6.70   2
   0  -8   7   -5.08   16.56   4
   0  -8  -7    1.22   11.73   2
   0  -8  -7   -7.07   23.96   3
  -1  -8  -7  204.83   15.58   1
   1  -8   7  179.17   19.17   4
  -1  -8  -7  195.69   29.49   3
  -1  -8  -7  243.47   25.46   4
  -1  -8  -7  192.02   25.92   2
  -2  -8  -7  357.06   28.99   4
  -2  -8  -7  292.89   32.94   3
  -2  -8  -7  340.09   26.82   2
   2  -8   7  294.90   22.67   4
  -2  -8  -7  310.87   19.51   1
  -3  -8  -7   13.65   13.02   1
  -3  -8  -7   39.41   22.60   4
  -3  -8  -7    3.51   14.57   3
  -3  -8  -7   11.88   14.99   2
   3  -8   7    7.27    8.44   4
   4  -8   7 1116.15   63.23   4
  -4  -8  -7 1046.43   55.46   1
  -4  -8  -7 1243.62   65.96   2
  -4  -8  -7 1069.23   86.26   3
  -4  -8  -7 1063.11   64.77   4
  -5  -8  -7   10.04   12.48   2
  -5  -8  -7   19.84   18.84   3
  -5  -8  -7   64.73   21.34   4
  -5  -8  -7   -3.95    5.59   1
   5  -8   7   23.20   13.84   4
  -6  -8  -7  412.60   31.62   2
   6  -8   7  373.25   26.93   4
  -6  -8  -7  431.27   25.34   1
  -7  -8  -7   11.96   14.26   2
  -7  -8  -7    7.67   17.59   1
  -8  -8  -7   17.57   18.40   1
  -9   8  -7   -2.59   10.99   2
  -9  -8  -7    6.10   36.38   1
 -10  -8  -7   58.82   23.85   1
 -10   8  -7   29.27   39.68   2
 -11   8  -7   36.10   38.94   2
 -11  -8  -7   38.52   22.64   1
 -12  -8  -7    5.30   18.98   1
 -12   8  -7   -5.34  479.50   2
  16  -9  -7   54.80   39.13   3
 -16  -9   7   97.92   36.37   4
 -16  -9   7   76.83   22.28   1
 -15  -9   7    1.35   10.84   1
  15  -9  -7   -6.07   24.43   3
 -15  -9   7   49.30   29.04   4
 -14  -9   7    2.37  142.34   1
 -14  -9   7   43.65   31.96   4
  14  -9  -7    7.62   61.03   3
 -13  -9   7    3.40   10.99   1
 -13  -9   7   12.09   27.60   4
 -12  -9   7    2.47   19.73   4
 -12  -9   7   13.57   13.97   1
  11  -9  -7   10.87   26.10   3
 -11  -9   7    4.20   21.12   4
 -11  -9   7   16.24   13.70   1
 -10  -9   7  179.70   27.34   4
 -10  -9   7  156.63   14.38   1
  10  -9  -7  124.81   27.04   3
  -9  -9   7   -4.65   13.64   1
  -9  -9   7   17.26   14.71   4
   9  -9  -7    3.16   15.49   3
  -8  -9   7   16.87   16.00   4
   8  -9  -7   34.61   16.58   3
  -8  -9   7   18.71    9.80   1
  -7  -9   7   61.57    9.18   1
   7  -9  -7   70.01   23.03   3
  -7  -9   7   82.43   20.34   4
  -6  -9   7  154.46   11.27   1
  -6  -9   7  141.10   21.95   4
   6  -9  -7  166.44   26.36   3
   5  -9  -7   90.99   25.58   3
  -5  -9   7  113.78   19.55   4
  -4  -9   7  359.13   23.59   4
   4  -9  -7  286.96   20.88   4
   4  -9  -7  357.43   34.55   3
   3  -9  -7  125.54   13.92   4
  -3  -9   7  143.14   18.98   4
   3  -9  -7  150.15   30.83   3
   2  -9  -7  204.87   16.42   4
   2  -9  -7  177.71   22.10   2
   2  -9  -7  234.27   32.32   3
  -2  -9   7  177.87   20.17   4
  -1  -9   7    9.10   13.91   4
   1  -9  -7   -9.61   29.76   3
   1  -9  -7   -2.88   24.82   2
   0  -9  -7  105.40   20.69   2
   0  -9  -7  137.72   20.82   4
   0  -9  -7  116.01   26.80   3
   0  -9   7  117.74   16.22   4
   1  -9   7  165.70   18.12   4
  -1  -9  -7  193.95   23.51   4
  -1  -9  -7  174.11   21.89   2
  -1  -9  -7  173.90   28.26   3
  -2  -9  -7   66.26   23.25   3
   2  -9   7   50.90   15.23   4
  -2  -9  -7   53.01   21.65   2
  -2  -9  -7   68.39   19.60   4
  -2  -9  -7   38.03   13.29   1
  -3  -9  -7  114.35   22.73   4
  -3  -9  -7   49.33   12.98   1
  -3  -9  -7   39.06   21.70   2
   3  -9   7   57.15   15.80   4
  -3  -9  -7   61.67   23.76   3
  -4  -9  -7   76.69   15.16   1
  -4  -9  -7  143.98   23.14   4
  -4  -9  -7  114.58   23.12   2
  -4  -9  -7   89.84   25.20   3
   4  -9   7   87.89   18.77   4
   5  -9   7    3.13   18.99   4
  -5  -9  -7    4.11   14.36   1
  -5  -9  -7   22.35   21.55   4
  -5  -9  -7    0.49   10.34   2
  -5  -9  -7   33.57   27.10   3
  -6  -9  -7   59.66   20.62   2
   6  -9   7   58.28   16.50   4
  -6  -9  -7   43.14   16.06   1
  -7  -9  -7  278.29   21.46   1
   7  -9   7  281.11   22.88   4
  -8  -9  -7   -2.64    4.13   1
   8  -9   7    4.15   18.15   4
  -9   9  -7   -8.44   16.39   2
   9  -9   7   11.31   22.41   4
  -9  -9  -7   10.31   19.67   1
  10  -9   7   30.72   17.72   4
 -10  -9  -7    5.93   14.32   1
 -11  -9  -7    6.91   45.59   1
 -16 -10   7   16.98   19.22   1
  16 -10  -7    2.07   12.27   3
 -15 -10   7   25.60   26.93   4
  15 -10  -7   42.30   27.86   3
 -15 -10   7    9.91   16.88   1
 -14 -10   7   45.92   16.54   1
 -14 -10   7   90.04   34.10   4
  14 -10  -7   64.90   30.42   3
  13 -10  -7   18.19   28.14   3
 -13 -10   7    8.14   28.55   4
 -13 -10   7    8.84   17.70   1
 -12 -10   7    1.10    8.30   1
  12 -10  -7   24.41   25.83   3
 -11 -10   7    8.35   13.37   1
  11 -10  -7    8.00   23.51   3
 -10 -10   7    6.92   13.21   1
 -10 -10   7   30.30   22.72   4
  10 -10  -7   14.67   20.41   3
  -9 -10   7  161.19   13.65   1
   9 -10  -7  162.25   25.28   3
  -9 -10   7  216.58   21.79   4
   8 -10  -7  216.59   27.64   3
  -8 -10   7  254.97   23.82   4
   7 -10  -7  232.82   29.44   3
  -7 -10   7  278.05   25.37   4
   6 -10  -7  103.31   23.98   3
  -6 -10   7   89.96   23.61   4
   5 -10  -7   -3.28  203.87   3
  -5 -10   7   -3.39    9.22   4
  -4 -10   7  106.22   17.72   4
   4 -10  -7   89.12   25.37   3
   3 -10  -7    1.34   16.24   3
  -3 -10   7   -5.47   27.15   4
   3 -10  -7   14.06   10.18   4
   2 -10  -7  201.48   31.57   3
   2 -10  -7  179.12   16.11   4
  -2 -10   7  152.91   19.58   4
  -1 -10   7   67.77   16.55   4
   1 -10  -7   76.84   27.03   3
   1 -10  -7   44.95   19.69   4
   0 -10  -7  132.61   21.39   2
   0 -10  -7  143.00   27.31   3
   0 -10  -7  115.51   20.79   4
   0 -10   7  133.98   18.30   4
  -1 -10  -7   56.27   24.63   3
  -1 -10  -7   71.41   21.40   2
   1 -10   7   47.82   16.92   4
  -1 -10  -7   61.53   21.35   4
   2 -10   7  120.24   18.46   4
  -2 -10  -7  131.74   14.18   1
  -2 -10  -7  157.06   24.62   4
  -2 -10  -7  140.84   25.62   3
  -2 -10  -7  139.28   23.58   2
  -3 -10  -7  158.74   24.67   2
  -3 -10  -7  190.69   23.74   4
   3 -10   7  162.52   19.90   4
  -3 -10  -7  158.55   15.64   1
  -3 -10  -7  167.10   27.85   3
  -4 -10  -7  385.13   30.73   4
  -4 -10  -7  366.77   22.46   1
  -4 -10  -7  382.11   30.13   2
  -4 -10  -7  375.15   37.36   3
   4 -10   7  370.40   26.46   4
  -5 -10  -7  409.92   24.81   1
  -5 -10  -7  434.30   33.34   4
  -5 -10  -7  391.77   41.81   3
   5 -10   7  429.07   28.84   4
  -5 -10  -7  426.01   31.05   2
  -6 -10  -7   84.96   26.42   4
  -6 -10  -7   66.40   16.32   1
   6 -10   7   71.53   18.33   4
  -6 -10  -7   52.10   21.85   2
   7 -10   7    4.45   22.80   4
  -7 -10  -7    1.50    9.19   1
  -8 -10  -7   16.49   20.08   1
   8 -10   7   42.79   20.50   4
  -9 -10  -7   32.02   20.14   1
   9 -10   7   73.13   20.73   4
 -10  10  -7  136.65   40.73   2
 -10 -10  -7  171.90   25.12   1
  10 -10   7  166.81   25.10   4
 -11 -10  -7   52.29   22.01   1
  15 -11  -7   86.95   34.77   3
 -15 -11   7  102.68   20.16   1
 -14 -11   7   -7.34   22.93   1
 -14 -11   7   16.62   31.65   4
  14 -11  -7   -1.35   45.57   3
  13 -11  -7   -4.90   40.00   3
 -13 -11   7    2.68   49.73   4
 -12 -11   7   63.30   36.62   4
  12 -11  -7   51.75   27.16   3
  11 -11  -7   28.84   27.01   3
  10 -11  -7   71.51   24.41   3
 -10 -11   7   90.75   22.00   4
  -9 -11   7  175.78   22.22   4
   9 -11  -7  129.14   26.38   3
  -8 -11   7   35.21   18.86   4
   8 -11  -7   20.84   24.07   3
   7 -11  -7   21.60   22.36   3
  -7 -11   7   30.74   22.86   4
   6 -11  -7   94.54   24.48   3
  -6 -11   7  106.15   22.07   4
   5 -11  -7   77.41   27.38   3
  -5 -11   7   84.76   23.96   4
  -4 -11   7  118.15   18.32   4
   4 -11  -7  101.76   28.32   3
  -3 -11   7  304.00   24.17   4
   3 -11  -7  330.91   36.23   3
   2 -11  -7   16.11   12.12   4
   2 -11  -7   -6.83   39.44   3
   1 -11  -7    7.27   22.61   3
  -1 -11   7    1.16   17.28   4
   0 -11  -7   23.60   17.43   4
   0 -11   7   18.74   15.51   4
   0 -11  -7   24.25   25.88   3
  -1 -11  -7  108.11   27.39   3
  -1 -11  -7  106.28   23.10   4
   1 -11   7   99.83   17.83   4
  -2 -11  -7  151.38   23.33   4
  -2 -11  -7  206.41   28.24   3
   2 -11   7  159.21   19.05   4
  -2 -11  -7  166.55   23.80   2
  -3 -11  -7   58.37   14.51   1
  -3 -11  -7   69.09   21.81   2
  -3 -11  -7  101.18   20.74   4
  -3 -11  -7   77.01   26.01   3
   3 -11   7   53.07   16.87   4
  -4 -11  -7   56.40   20.30   4
  -4 -11  -7   -6.71   14.50   2
  -4 -11  -7    8.90   17.37   1
  -4 -11  -7   18.99   21.23   3
   4 -11   7   -1.62    6.26   4
   5 -11   7   57.03   19.10   4
  -5 -11  -7   98.15   24.99   4
  -5 -11  -7   34.83   20.72   2
  -5 -11  -7   35.25   14.60   1
  -6 -11  -7  105.97   25.85   4
  -6 -11  -7   32.59   15.13   1
   6 -11   7   28.58   20.24   4
  -7 -11  -7    3.74   53.38   1
   7 -11   7   25.35   16.03   4
   8 -11   7  316.45   27.11   4
  -8 -11  -7  318.19   24.93   1
   9 -11   7   54.65   23.87   4
  -9 -11  -7   30.05   19.26   1
 -10 -11  -7   -4.12   13.23   1
  14 -12  -7   32.10   31.57   3
 -13 -12   7   83.86   41.04   4
  13 -12  -7   97.57   29.45   3
  12 -12  -7   38.13   28.81   3
 -12 -12   7    9.88   34.64   4
  11 -12  -7   46.96   28.67   3
 -11 -12   7   43.15   35.78   4
 -10 -12   7   31.96   19.40   4
  10 -12  -7   19.71   26.39   3
   9 -12  -7   10.96   26.11   3
  -9 -12   7   54.42   21.85   4
   8 -12  -7   10.43   19.79   3
  -8 -12   7   12.36   13.95   4
   7 -12  -7  140.00   26.78   3
  -7 -12   7  157.71   23.48   4
  -6 -12   7    0.51    3.45   4
  -5 -12   7   68.91   23.34   4
   5 -12  -7   72.36   27.49   3
  -4 -12   7    7.41   13.25   4
   4 -12  -7   28.46   29.34   3
   3 -12  -7   42.60   30.83   3
  -3 -12   7   39.82   18.85   4
  -2 -12   7  119.26   19.30   4
   2 -12  -7  118.94   29.89   3
   1 -12  -7   46.73   31.93   3
  -1 -12   7   56.20   17.26   4
   0 -12   7   26.83   15.67   4
   0 -12  -7   27.75   28.34   3
   0 -12  -7   23.04   19.27   4
   1 -12   7    2.77   12.51   4
  -1 -12  -7    9.01   38.29   3
  -1 -12  -7   11.86   28.94   4
  -2 -12  -7   27.24   21.01   3
  -2 -12  -7    2.90   50.92   4
   2 -12   7    5.14   48.89   4
  -3 -12  -7  168.38   25.50   4
  -3 -12  -7  178.01   29.36   3
   3 -12   7  125.83   20.32   4
   4 -12   7   15.33   20.54   4
  -4 -12  -7   41.59   21.91   4
  -4 -12  -7   11.14   31.38   3
  -4 -12  -7    9.58   16.66   1
   5 -12   7   80.39   21.50   4
  -5 -12  -7   88.77   15.95   1
  -5 -12  -7  143.64   27.02   4
   6 -12   7   -1.52   13.08   4
  -6 -12  -7    5.26   14.87   1
  -6 -12  -7   45.57   24.47   4
  -7 -12  -7   78.83   18.00   1
   7 -12   7   92.11   22.40   4
  -7 -12  -7  107.58   29.75   4
   8 -12   7   19.71   21.96   4
  -8 -12  -7   -9.45   11.10   1
  -9 -12  -7   39.64   20.14   1
  12 -13  -7   -1.64  116.48   3
 -11 -13   7  136.03   35.48   4
  11 -13  -7  126.43   28.96   3
  10 -13  -7   45.67   25.36   3
 -10 -13   7   34.82   31.31   4
   9 -13  -7   76.24   26.58   3
  -9 -13   7  145.57   24.43   4
  -8 -13   7   49.15   24.38   4
   8 -13  -7   49.47   27.74   3
   7 -13  -7   16.33   32.26   3
  -7 -13   7   34.96   23.78   4
  -6 -13   7    0.16    4.58   4
   6 -13  -7    8.21   18.65   3
   5 -13  -7  172.84   31.16   3
  -5 -13   7  157.49   26.06   4
   4 -13  -7   -3.93   60.22   3
  -4 -13   7   -7.60   12.68   4
   3 -13  -7   59.97   29.95   3
  -3 -13   7   60.19   19.12   4
  -2 -13   7   11.45   19.01   4
   1 -13  -7   30.95   25.98   3
  -1 -13   7   47.86   18.12   4
   0 -13  -7    6.07   32.50   3
  -1 -13  -7  329.68   29.07   4
   1 -13   7  301.93   25.76   4
  -1 -13  -7  358.79   39.05   3
   2 -13   7   -7.35   19.61   4
  -2 -13  -7   14.24   22.24   3
  -2 -13  -7   -5.32   22.62   4
  -3 -13  -7   94.36   25.15   4
  -3 -13  -7   75.67   27.47   3
   3 -13   7   44.18   24.87   4
  -4 -13  -7   52.37   25.13   4
  -4 -13  -7   49.08   29.08   3
   4 -13   7   19.99   17.51   4
   5 -13   7   40.88   22.71   4
  -5 -13  -7   55.56   27.75   4
   6 -13   7    9.06   19.85   4
  -6 -13  -7   50.37   24.12   4
   7 -13   7  222.37   26.45   4
  -7 -13  -7  266.00   33.64   4
  10 -14  -7   -1.15   43.23   3
   9 -14  -7   40.21   29.49   3
  -9 -14   7   86.98   28.07   4
  -8 -14   7    4.27  151.44   4
   8 -14  -7    3.01   24.22   3
  -7 -14   7   77.40   25.69   4
   7 -14  -7   93.90   28.16   3
  -6 -14   7   -1.94    9.26   4
   6 -14  -7   -1.13   43.40   3
  -5 -14   7    6.80   47.65   4
   4 -14  -7   53.78   29.87   3
  -4 -14   7   40.76   28.28   4
   3 -14  -7  192.50   35.74   3
  -3 -14   7  128.86   24.35   4
   2 -14  -7   67.77   35.18   3
  -2 -14   7   50.38   21.01   4
  -1 -14   7  291.47   27.27   4
   1 -14  -7  357.80   40.07   3
   0 -14  -7   14.65   26.82   3
   0 -14   7   -1.86   11.14   4
   1 -14   7    9.85   13.77   4
  -1 -14  -7   19.83   20.58   3
  -2 -14  -7   15.65   30.43   3
   2 -14   7    3.49   24.05   4
   3 -14   7   44.34   21.28   4
  -3 -14  -7   65.66   25.52   4
  -3 -14  -7   87.00   29.80   3
  -4 -14  -7   39.29   24.99   4
   4 -14   7   -2.56   15.99   4
  -4 -14  -7   25.43   28.80   3
  -5 -14  -7  116.73   27.21   4
   5 -14   7  115.79   24.19   4
  -6 -14  -7   43.89   25.80   4
  -7 -14  -7   54.24   28.30   4
  -7 -15   7   24.95   26.90   4
   7 -15  -7    2.26   68.77   3
  -6 -15   7    3.29   11.61   4
   6 -15  -7   22.28   39.62   3
  -5 -15   7  112.93   28.93   4
   5 -15  -7  139.23   36.23   3
  -4 -15   7   -5.83   19.32   4
  -3 -15   7    5.71   75.44   4
   3 -15  -7    4.77   42.01   3
  -2 -15   7   12.05   19.70   4
   2 -15  -7   32.39   32.70   3
  -1 -15   7    6.05   22.20   4
   0 -15  -7   12.12   29.09   3
   0 -15   7   10.92   23.83   4
  -1 -15  -7   74.13   32.86   3
   1 -15   7   42.75   21.93   4
  -2 -15  -7    8.94   32.43   3
   2 -15   7   14.53   18.50   4
   3 -15   7   13.73   28.72   4
  -3 -15  -7   38.85   31.49   3
 -19   0   8    5.25    9.96   1
  19   0  -8   32.78   52.48   3
  18   0  -8   28.36   41.56   3
 -18   0   8   27.49   21.86   1
  17   0  -8   60.79   41.12   3
 -16   0   8   34.99   19.01   1
  16   0  -8  115.44   41.95   3
 -15   0   8   14.64   17.56   1
  15   0  -8  112.73   37.46   3
  14   0  -8  431.46   48.45   3
 -14   0   8  491.61   28.54   1
 -13   0   8   20.04   14.04   1
  13   0  -8  166.23   37.84   3
 -12   0   8  337.24   22.12   1
 -11   0   8   -2.98   54.97   1
 -10   0   8   71.76   15.95   1
   8   0  -8  284.87   18.33   2
  -8   0   8  254.19   19.20   4
  -7   0   8   11.27    9.33   4
   7   0  -8   17.84    7.79   2
  -6   0   8  482.07   28.10   4
   6   0  -8  498.46   29.97   2
  -5   0   8   -9.02    4.95   4
   5   0  -8   -1.94    1.64   2
   4   0  -8  127.63   14.70   2
  -4   0   8  120.91    9.02   4
  -3   0   8    1.59    2.27   4
   3   0  -8    6.25   10.34   2
   2   0  -8 2131.14  169.93   3
   2   0  -8 2414.29  127.39   2
   1   0  -8    7.85   14.28   2
   1   0  -8   21.32   14.86   3
   0   0  -8  697.11   53.93   3
   0   0  -8  680.66   42.90   2
  -1   0  -8    2.15   10.87   1
  -1   0  -8    6.14    8.88   3
  -1   0  -8   23.94   18.41   2
  -2   0  -8   70.92   19.78   2
  -2   0  -8   57.36   10.73   1
  -2   0  -8   36.58    5.61   3
  -3   0  -8   24.30   20.40   2
  -3   0  -8   -6.24   12.79   1
  -4   0  -8  280.30   17.41   1
  -4   0  -8  319.11   27.87   2
  -5   0  -8    2.95    7.12   1
  -5   0  -8   32.43   19.38   2
  -6   0  -8  351.39   20.09   1
  -6   0  -8  373.90   32.75   2
  -7   0  -8   25.40   23.38   2
  -7   0  -8   10.73    7.98   1
  -8   0  -8  239.89   17.01   1
  -8   0  -8  261.70   30.09   2
  -9   0  -8   16.04   19.72   2
  -9   0  -8    6.62    7.41   1
 -10   0  -8  431.43   35.93   2
 -10   0  -8  412.87   24.21   1
 -11   0  -8   29.26   27.63   2
 -11   0  -8   14.42   15.01   1
 -12   0  -8  308.36   21.75   1
 -12   0  -8  299.73   37.87   2
 -13   0  -8    3.27   15.91   1
 -14   0  -8    9.77   12.18   1
 -19  -1   8    7.08   24.94   1
 -19   1   8   -4.11   52.20   1
  19   1  -8   55.14   45.36   3
  18   1  -8   82.55   43.68   3
 -18   1   8    8.15   21.43   1
 -18  -1   8   22.83   20.95   1
  17   1  -8  159.82   41.06   3
  17  -1  -8   11.16   49.55   3
 -17   1   8   -1.12    8.10   1
 -17  -1   8   19.58   16.28   1
 -16   1   8  181.70   21.04   1
  16   1  -8  257.87   44.14   3
 -16  -1   8  197.11   22.05   1
  16  -1  -8  175.13   43.47   3
 -15  -1   8  162.48   20.61   1
  15  -1  -8  138.74   42.25   3
 -15   1   8  158.26   19.66   1
 -14   1   8  235.08   20.77   1
  14  -1  -8  278.22   42.09   3
 -14  -1   8  275.38   22.18   1
  13  -1  -8  106.12   40.72   3
 -13   1   8   20.78   15.47   1
 -13  -1   8   16.77   14.10   1
 -12  -1   8   15.27   15.18   1
 -12   1   8   20.62   16.86   1
  12  -1  -8   79.37   29.60   3
 -11   1   8   40.52   14.22   1
 -11  -1   8   23.40   13.05   1
 -10  -1   8  352.32   28.73   4
 -10  -1   8  415.73   24.26   1
  10  -1  -8  439.73   44.22   3
   9  -1  -8  298.42   33.19   3
  -9  -1   8  177.90   19.95   4
   8   1  -8    7.94    8.04   2
   8  -1  -8  167.93   29.14   3
  -7  -1   8   50.93   16.78   4
   7  -1  -8   59.79   12.54   2
   7   1  -8   66.19    9.71   2
   7  -1  -8  140.40   22.20   3
   6  -1  -8  347.68   34.32   3
  -6  -1   8  342.41   20.82   4
   6  -1  -8  338.60   21.74   2
   6   1  -8  336.42   22.99   2
   5  -1  -8   68.96   19.91   3
  -5  -1   8   17.00    8.64   4
   5   1  -8   31.97   10.33   2
   5  -1  -8   -5.17    5.48   2
   4  -1  -8 1537.93  113.21   3
  -4   1   8 1332.38   81.06   4
  -4  -1   8 1538.92   81.69   4
   4  -1  -8 1514.67   83.97   2
   4   1  -8 1537.04   84.06   2
  -3  -1   8 2060.78  110.19   4
   3  -1  -8 2013.49  112.82   2
   3  -1  -8 1976.58  151.46   3
   3   1  -8 2088.51  113.14   2
  -3   1   8 1926.95  109.70   4
   2   1  -8 1093.21   60.26   2
  -2  -1   8  997.96   57.57   4
   2  -1  -8 1094.13   80.26   3
   2  -1  -8  993.34   59.50   2
   1  -1  -8  143.40   25.68   3
   1  -1  -8  139.76   22.21   2
   1   1  -8  188.97   20.72   2
   0   1  -8  157.47   17.28   3
   0  -1  -8   94.87   20.83   2
   0  -1  -8  124.34   16.24   3
   0   1  -8  138.42   20.51   2
  -1  -1  -8  764.42   55.18   3
  -1   1  -8  697.90   55.39   3
  -1  -1  -8  679.67   45.36   2
  -1  -1  -8  744.77   36.31   1
  -1   1  -8  715.69   43.93   2
  -2  -1  -8 1004.10   71.48   3
  -2   1  -8  974.51   46.64   1
  -2   1  -8  877.35   56.71   2
  -2  -1  -8  974.21   46.96   1
  -2  -1  -8  879.26   56.59   2
  -3   1  -8  235.62   26.50   2
  -3   1  -8  194.52   13.81   1
  -3  -1  -8  226.72   15.31   1
  -3  -1  -8  207.76   27.58   2
  -4   1  -8  138.79   25.65   2
  -4  -1  -8  129.48   13.97   1
  -4   1  -8  135.03   12.03   1
  -4  -1  -8  155.42   27.61   2
  -5   1  -8  258.35   16.47   1
  -5  -1  -8  302.25   31.87   2
  -5  -1  -8  284.22   17.88   1
  -5   1  -8  267.92   29.43   2
  -6   1  -8  426.89   23.13   1
  -6  -1  -8  453.99   23.80   1
  -6  -1  -8  425.86   37.04   2
  -6   1  -8  410.71   36.66   2
  -7   1  -8    5.46   10.75   1
  -7   1  -8   23.02   27.07   2
  -7  -1  -8   25.12   26.35   2
  -7  -1  -8    5.06   29.49   1
  -8  -1  -8  731.07   37.01   1
  -8  -1  -8  746.66   49.10   2
  -8   1  -8  697.18   36.44   1
  -8   1  -8  660.41   47.87   2
  -9  -1  -8   -5.50   33.85   1
  -9   1  -8   29.63   20.07   2
  -9  -1  -8   17.39   26.82   2
  -9   1  -8   17.71    9.87   1
 -10   1  -8   50.18   30.32   2
 -10   1  -8   79.82   13.31   1
 -10  -1  -8   61.86   31.75   2
 -10  -1  -8   67.06   14.94   1
 -11   1  -8   45.63   31.06   2
 -11  -1  -8   25.78   15.99   1
 -11   1  -8   36.21   14.19   1
 -11  -1  -8    2.89  168.04   2
 -12  -1  -8   41.25   16.65   1
 -12   1  -8   60.08   30.98   2
 -12   1  -8   36.26   16.74   1
 -13  -1  -8   -3.11   35.43   1
 -14  -1  -8  107.48   19.89   1
 -14   1  -8   88.10   19.80   1
 -19   2   8   14.30   23.78   1
  19   2  -8  140.82   45.95   3
 -19  -2   8   25.11   21.76   1
 -18  -2   8  188.20   26.05   1
  18  -2  -8   75.39   62.82   3
 -18   2   8  168.83   23.56   1
  18   2  -8  311.45   48.51   3
 -17  -2   8   -9.42   17.80   1
 -17   2   8  -10.04   20.69   1
 -16  -2   8   12.86   16.77   1
  16  -2  -8   12.15   53.18   3
 -16   2   8    7.45   21.89   1
 -15  -2   8   19.89   21.27   1
 -15   2   8   26.15   20.45   1
  15  -2  -8   38.17   60.19   3
 -14   2   8   49.84   16.18   1
  14  -2  -8   65.99   48.24   3
 -14  -2   8   59.65   19.89   1
  13  -2  -8  308.73   48.88   3
 -13   2   8  282.55   21.67   1
 -13  -2   8  325.66   22.19   1
  12  -2  -8  704.44   68.63   3
 -12   2   8  748.18   38.30   1
 -12  -2   8  727.94   38.67   1
  11  -2  -8  262.52   41.18   3
 -11   2   8  211.46   19.91   1
 -11  -2   8  222.20   20.31   1
 -11  -2   8  225.29   23.72   4
 -10  -2   8  123.97   22.31   4
  10  -2  -8  183.93   40.14   3
 -10  -2   8  110.84   16.64   1
   9  -2  -8   63.60   26.63   3
  -9  -2   8   11.38   10.44   4
  -9  -2   8   34.35   11.51   1
   8  -2  -8   50.39   14.99   2
  -8  -2   8   48.26   22.56   4
   8   2  -8   74.08    8.67   2
   8  -2  -8  112.09   34.66   3
   7  -2  -8  141.55   33.59   3
   7   2  -8   77.00   13.93   2
   7  -2  -8   75.40   14.45   2
  -7  -2   8  110.91   13.28   4
   6   2  -8  163.11   14.87   2
  -6  -2   8  154.29   13.96   4
   6  -2  -8  145.90   15.28   2
   6  -2  -8  142.43   35.54   3
  -5  -2   8  250.31   15.76   4
   5   2  -8  240.36   20.70   2
   5  -2  -8  244.21   17.87   2
   5  -2  -8  215.65   33.06   3
  -4  -2   8   -2.35    8.99   4
   4   2  -8    8.65   11.87   2
   3  -2  -8   17.67  619.23   3
  -3  -2   8   42.08   10.49   4
   3   2  -8   46.69   16.35   2
   3  -2  -8   43.63   16.44   2
   2   2  -8  819.91   49.13   2
   2  -2  -8  835.15   63.34   3
   2  -2  -8  823.18   48.32   2
  -2  -2   8  819.61   46.19   4
   1  -2  -8  166.27   18.17   2
   1   2  -8  184.87   21.41   2
   1  -2  -8  173.39   21.01   3
   0  -2  -8 1246.75   89.67   3
   0   2  -8 1202.98   68.02   2
   0  -2  -8 1100.55   67.59   2
  -1  -2  -8   63.25   12.39   3
  -1  -2  -8   46.74   11.15   1
  -1   2  -8   66.26   20.18   2
  -2  -2  -8  164.75   26.73   2
  -2  -2  -8  179.47   17.85   3
  -2   2  -8  146.38   14.08   3
  -2   2  -8  152.89   11.73   1
  -2   2  -8  190.19   23.99   2
  -2  -2  -8  165.70   13.96   1
  -3  -2  -8  104.53   24.62   2
  -3  -2  -8  144.20   14.24   3
  -3  -2  -8  139.08   14.05   1
  -3   2  -8  131.18   11.46   1
  -3   2  -8  157.55   23.25   2
  -4   2  -8   35.84    9.71   1
  -4  -2  -8   27.90   29.85   2
  -4   2  -8   35.32   22.66   2
  -4  -2  -8   48.49   14.40   1
  -5  -2  -8  141.88   16.89   1
  -5   2  -8  150.90   12.27   1
  -5   2  -8  166.06   28.05   2
  -5  -2  -8  175.53   33.64   2
  -6   2  -8  232.56   30.55   2
  -6  -2  -8  201.69   34.31   2
  -6  -2  -8  246.78   16.99   1
  -6   2  -8  207.85   13.93   1
  -7  -2  -8   65.31   28.87   2
  -7   2  -8   50.53   10.27   1
  -7   2  -8   88.65   25.33   2
  -7  -2  -8   52.34   13.50   1
  -8  -2  -8    9.64   34.51   2
  -8   2  -8   11.87   27.91   2
  -8   2  -8   12.72   10.10   1
  -8  -2  -8   21.08   12.31   1
  -9   2  -8   78.42   12.55   1
  -9  -2  -8  105.59   34.12   2
  -9  -2  -8   62.04   14.05   1
  -9   2  -8  104.09   27.84   2
 -10   2  -8  271.69   30.62   2
 -10   2  -8  163.98   16.07   1
 -10  -2  -8  178.68   33.98   2
 -10  -2  -8  190.03   18.77   1
 -11  -2  -8   73.42   19.59   1
 -11   2  -8   80.04   30.13   2
 -11   2  -8  102.44   15.65   1
 -12  -2  -8   24.10   14.68   1
 -12   2  -8   24.53   23.03   1
 -12   2  -8   71.22   29.87   2
 -13  -2  -8   -5.03   89.99   1
 -13   2  -8    0.00    0.04   2
 -13   2  -8   -1.18  190.66   1
  19   3  -8  174.89   50.98   3
 -19   3   8   34.67   21.67   1
 -18  -3   8    8.81   18.19   1
 -18   3   8    6.25   22.82   1
 -17  -3   8  129.85   24.34   1
 -17   3   8  104.73   21.41   1
  16  -3  -8  115.99   56.21   3
 -16   3   8  176.07   21.47   1
 -16  -3   8  187.15   23.73   1
 -15   3   8   65.85   16.89   1
 -15  -3   8   68.80   18.92   1
 -14  -3   8   44.33   20.86   1
 -14   3   8   53.71   17.59   1
  14  -3  -8   22.59   70.03   3
 -13   3   8    6.65   17.47   1
 -13  -3   8    3.97   10.48   1
 -12  -3   8  102.58   21.36   4
  12  -3  -8   50.18   58.66   3
 -12  -3   8   75.05   16.00   1
 -12   3   8   69.74   14.39   1
 -11  -3   8  167.07   25.08   4
 -11  -3   8  136.78   17.23   1
 -11   3   8  121.15   15.31   1
  11  -3  -8  117.80   51.64   3
  10  -3  -8  611.33   69.21   3
 -10  -3   8  663.82   35.24   1
 -10  -3   8  647.00   43.21   4
   9  -3  -8   12.72   33.59   3
  -9  -3   8   17.54   16.03   1
  -9  -3   8   -6.90   13.42   4
   8   3  -8  278.90   17.47   2
  -8  -3   8  331.11   22.59   4
   8  -3  -8  330.46   43.82   3
  -8  -3   8  310.06   19.19   1
  -7  -3   8  152.72   16.77   4
   7  -3  -8  138.88   43.42   3
   7   3  -8  136.97   13.63   2
   7  -3  -8  117.44   16.63   2
  -6  -3   8   42.73   15.57   4
   6   3  -8   30.05   23.68   2
   6  -3  -8   44.19   15.81   2
   5  -3  -8  654.51   57.50   3
   5   3  -8  704.37   39.90   2
   5  -3  -8  630.93   38.83   2
  -5  -3   8  647.08   37.36   4
   4  -3  -8 1165.36   68.60   2
   4  -3  -8 1219.75   92.33   3
  -4  -3   8 1231.35   67.10   4
   4   3  -8 1214.41   68.73   2
  -3  -3   8  456.21   27.16   4
   3  -3  -8  468.38   37.83   3
   3   3  -8  470.00   31.38   2
   3  -3  -8  433.62   30.17   2
  -2  -3   8   68.08   11.38   4
   2   3  -8   75.46   16.44   2
   2  -3  -8   70.37   19.42   3
   2  -3  -8   63.81   20.99   2
   1   3  -8   62.03   16.70   2
   1  -3  -8   47.91   17.66   2
   1  -3  -8   52.90   18.29   3
  -1  -3   8   56.80   10.90   4
   0  -3  -8  501.03   33.44   2
   0  -3  -8  520.69   39.98   3
   0   3  -8  484.36   34.30   2
  -1  -3  -8 1127.29   85.91   3
  -1  -3  -8 1236.16   56.03   1
  -1   3  -8 1086.80   65.40   2
  -1  -3  -8 1086.39   65.38   2
  -2  -3  -8 1295.05   90.63   3
  -2   3  -8 1158.90   69.61   2
  -2  -3  -8 1095.81   69.01   2
  -2  -3  -8 1211.14   58.92   1
  -3   3  -8  128.74   26.65   2
  -3  -3  -8  122.81   14.96   1
  -3  -3  -8  164.69   22.53   2
  -3   3  -8  116.44   10.30   1
  -3  -3  -8  137.61   17.03   3
  -4   3  -8  169.90   12.44   1
  -4   3  -8  174.38   25.61   2
  -4  -3  -8  242.17   23.96   2
  -4  -3  -8  190.57   17.05   1
  -5  -3  -8   40.59   14.44   1
  -5   3  -8   16.99    8.62   1
  -5   3  -8   35.20   23.96   2
  -5  -3  -8    8.17   32.62   2
  -6  -3  -8  373.94   19.91   1
  -6  -3  -8  278.32   33.04   2
  -6   3  -8  308.15   30.82   2
  -6   3  -8  276.48   16.68   1
  -7  -3  -8 1110.86   66.87   2
  -7  -3  -8 1132.68   55.45   1
  -7   3  -8 1091.53   53.85   1
  -7   3  -8 1048.85   65.76   2
  -8  -3  -8  269.62   33.16   2
  -8   3  -8  232.95   31.56   2
  -8   3  -8  247.57   15.91   1
  -8  -3  -8  254.08   19.12   1
  -9   3  -8  138.16   30.24   2
  -9   3  -8  111.22   13.09   1
  -9  -3  -8  100.05   31.84   2
  -9  -3  -8  117.84   18.00   1
 -10   3  -8   44.65   12.42   1
 -10   3  -8   49.09   27.91   2
 -10  -3  -8   12.98   20.45   2
 -10  -3  -8   20.23   16.76   1
 -11   3  -8   31.28   14.65   1
 -11  -3  -8   15.95   16.15   1
 -11   3  -8   29.87   28.60   2
 -12   3  -8  121.54   33.79   2
 -12   3  -8  150.11   19.15   1
 -12  -3  -8  135.95   20.38   1
 -13   3  -8   65.90   30.49   2
 -13  -3  -8    2.14   30.69   1
 -19   4   8   14.00   20.32   1
 -18   4   8    8.83   27.32   1
  18  -4  -8   51.61   32.79   3
 -18  -4   8   43.58   22.47   1
 -17  -4   8   31.84   21.92   1
 -17   4   8   12.87   22.86   1
  17  -4  -8   98.25   34.07   3
  16  -4  -8   16.97   29.20   3
 -16  -4   8    4.28   12.73   1
 -16   4   8   21.22   16.17   1
 -15  -4   8   34.24   16.97   1
 -15   4   8   30.25   19.92   1
 -14   4   8   82.86   18.25   1
 -14  -4   8  118.58   19.72   1
  13  -4  -8  230.98   66.40   3
 -13   4   8  404.96   25.54   1
 -13  -4   8  454.49   34.37   4
 -13  -4   8  445.56   26.99   1
  12  -4  -8   31.86  721.78   3
 -12  -4   8  150.26   17.30   1
 -12  -4   8  198.03   26.08   4
 -12   4   8  158.25   16.89   1
 -11   4   8  272.57   19.36   1
 -11  -4   8  327.04   30.36   4
  11  -4  -8  274.07   52.08   3
 -11  -4   8  324.13   20.79   1
 -10  -4   8   63.83   16.87   1
 -10  -4   8   42.93   34.67   4
  -9  -4   8   28.68   13.01   1
   8  -4  -8 1672.75  132.20   3
  -8  -4   8 1746.47   82.99   1
  -8  -4   8 1696.58   94.92   4
   7  -4  -8  142.06   18.37   2
   7   4  -8  112.15   16.61   2
  -7  -4   8  133.40   18.06   4
   7  -4  -8  185.26   28.62   3
  -6  -4   8   83.20   17.95   4
   6  -4  -8  139.79   24.24   3
   6  -4  -8   93.83   18.22   2
   6   4  -8  104.64   16.53   2
   5   4  -8  109.31   17.71   2
   5  -4  -8  110.83   16.24   2
[truncated: 313,565 more chars]
