# Supplementary material
Source: MDPI journal article supplement (https://www.mdpi.com/2304-6740/7/2/13)
Supplement: s1 [file s1 › cif/complex7.cif]

 
data_LOL149AS
 
_audit_creation_method            'SHELXL-2014/7'
_shelx_SHELXL_version_number      '2014/7'
_chemical_name_systematic         ?
_chemical_name_common             ?
_chemical_melting_point           ?
_chemical_formula_moiety          ?
_chemical_formula_sum
 'C47 H45 Au2 Cl2 N8 O2 P2 S4' 
_chemical_formula_weight          1408.92

loop_
 _atom_type_symbol
 _atom_type_description
 _atom_type_scat_dispersion_real
 _atom_type_scat_dispersion_imag
 _atom_type_scat_source
 'C'  'C'   0.0033   0.0016
 'International Tables Vol C Tables 4.2.6.8 and 6.1.1.4'
 'H'  'H'   0.0000   0.0000
 'International Tables Vol C Tables 4.2.6.8 and 6.1.1.4'
 'N'  'N'   0.0061   0.0033
 'International Tables Vol C Tables 4.2.6.8 and 6.1.1.4'
 'O'  'O'   0.0106   0.0060
 'International Tables Vol C Tables 4.2.6.8 and 6.1.1.4'
 'P'  'P'   0.1023   0.0942
 'International Tables Vol C Tables 4.2.6.8 and 6.1.1.4'
 'S'  'S'   0.1246   0.1234
 'International Tables Vol C Tables 4.2.6.8 and 6.1.1.4'
 'Au'  'Au'  -2.0133   8.8022
 'International Tables Vol C Tables 4.2.6.8 and 6.1.1.4'
 'Cl'  'Cl'   0.1484   0.1585
 'International Tables Vol C Tables 4.2.6.8 and 6.1.1.4'
 
_space_group_crystal_system       triclinic
_space_group_IT_number            2
_space_group_name_H-M_alt         'P -1'
_space_group_name_Hall            '-P 1'
 
_shelx_space_group_comment
;
The symmetry employed for this shelxl refinement is uniquely defined
by the following loop, which should always be used as a source of
symmetry information in preference to the above space-group names.
They are only intended as comments.
;
 
loop_
 _space_group_symop_operation_xyz
 'x, y, z'
 '-x, -y, -z'
 
_cell_length_a                    12.538(4)
_cell_length_b                    12.721(4)
_cell_length_c                    17.645(5)
_cell_angle_alpha                 69.941(5)
_cell_angle_beta                  81.474(5)
_cell_angle_gamma                 89.259(5)
_cell_volume                      2612.1(13)
_cell_formula_units_Z             2
_cell_measurement_temperature     100(2)
_cell_measurement_reflns_used     5532
_cell_measurement_theta_min       2.21
_cell_measurement_theta_max       28.13
 
_exptl_crystal_description        plate
_exptl_crystal_colour             colourless
_exptl_crystal_density_meas       ?
_exptl_crystal_density_method     ?
_exptl_crystal_density_diffrn     1.791          
_exptl_crystal_F_000              1370
_exptl_transmission_factor_min    ?
_exptl_transmission_factor_max    ?
_exptl_crystal_size_max           0.240
_exptl_crystal_size_mid           0.120
_exptl_crystal_size_min           0.040
_exptl_absorpt_coefficient_mu     5.979
_shelx_estimated_absorpt_T_min    0.328
_shelx_estimated_absorpt_T_max    0.796
_exptl_absorpt_correction_type    multi-scan
_exptl_absorpt_correction_T_min   0.328
_exptl_absorpt_correction_T_max   0.591
_exptl_absorpt_process_details    multi-scan
_exptl_absorpt_special_details    
;
SADABS; Area-Detector Absorption Correction. Bruker-AXS
within SAINT+ package, v. 6.02 (1999).
; 
_diffrn_ambient_temperature       100(2)
_diffrn_radiation_wavelength      0.71073
_diffrn_radiation_type            MoK\a
_diffrn_source                    'fine-focus sealed tube'
_diffrn_measurement_device_type   "Bruker SMART APEX CCD system" 
_diffrn_measurement_method        "\w rotations with narrow frames"
_diffrn_detector_area_resol_mean  8.26
_diffrn_reflns_number             21647
_diffrn_reflns_av_unetI/netI      0.0864
_diffrn_reflns_av_R_equivalents   0.0576
_diffrn_reflns_limit_h_min        -15
_diffrn_reflns_limit_h_max        15
_diffrn_reflns_limit_k_min        -15
_diffrn_reflns_limit_k_max        15
_diffrn_reflns_limit_l_min        -21
_diffrn_reflns_limit_l_max        20
_diffrn_reflns_theta_min          1.644
_diffrn_reflns_theta_max          26.000
_diffrn_reflns_theta_full         25.242
_diffrn_measured_fraction_theta_max   0.993
_diffrn_measured_fraction_theta_full  0.995
_diffrn_reflns_Laue_measured_fraction_max    0.993
_diffrn_reflns_Laue_measured_fraction_full   0.995
_diffrn_reflns_point_group_measured_fraction_max   0.993
_diffrn_reflns_point_group_measured_fraction_full  0.995
_reflns_number_total              10187
_reflns_number_gt                 7887
_reflns_threshold_expression      'I > 2\s(I)'
_reflns_Friedel_coverage          0.000
_reflns_Friedel_fraction_max      .
_reflns_Friedel_fraction_full     .
 
_reflns_special_details
;
 Reflections were merged by SHELXL according to the crystal
 class for the calculation of statistics and refinement.
 
 _reflns_Friedel_fraction is defined as the number of unique
 Friedel pairs measured divided by the number that would be
 possible theoretically, ignoring centric projections and
 systematic absences.
;
 
_computing_data_collection        'SMART v. 5.611 (Bruker AXS, 2000)' 
_computing_cell_refinement        'SAINT+ 6.02 (Bruker AXS, 1999)'
_computing_data_reduction         'SAINT+ 6.02 (Bruker AXS, 1999)'
_computing_structure_solution     'SHELXS-97 (Sheldrick, 1990)'
_computing_structure_refinement 'SHELXL-2014/7 (Sheldrick, 2014)'
_computing_molecular_graphics     'XP, SHELXTL v. 6.10 (Bruker, 2000)'
_computing_publication_material   'XCIF, SHELXTL v. 6.10 (Bruker, 2000)'
_refine_special_details           ?
_refine_ls_structure_factor_coef  Fsqd
_refine_ls_matrix_type            full
_refine_ls_weighting_scheme       calc
_refine_ls_weighting_details
'w=1/[\s^2^(Fo^2^)+(0.0708P)^2^] where P=(Fo^2^+2Fc^2^)/3'
_atom_sites_solution_primary      ?
_atom_sites_solution_secondary    ?
_atom_sites_solution_hydrogens    geom
_refine_ls_hydrogen_treatment     constr
_refine_ls_extinction_method      none
_refine_ls_extinction_coef        .
_refine_ls_number_reflns          10187
_refine_ls_number_parameters      600
_refine_ls_number_restraints      0
_refine_ls_R_factor_all           0.0759
_refine_ls_R_factor_gt            0.0556
_refine_ls_wR_factor_ref          0.1376
_refine_ls_wR_factor_gt           0.1280
_refine_ls_goodness_of_fit_ref    1.012
_refine_ls_restrained_S_all       1.012
_refine_ls_shift/su_max           0.001
_refine_ls_shift/su_mean          0.000
 
loop_
 _atom_site_label
 _atom_site_type_symbol
 _atom_site_fract_x
 _atom_site_fract_y
 _atom_site_fract_z
 _atom_site_U_iso_or_equiv
 _atom_site_adp_type
 _atom_site_occupancy
 _atom_site_site_symmetry_order  
 _atom_site_calc_flag
 _atom_site_refinement_flags_posn
 _atom_site_refinement_flags_adp
 _atom_site_refinement_flags_occupancy
 _atom_site_disorder_assembly
 _atom_site_disorder_group
Au1 Au 0.07734(2) 0.77661(3) 0.67398(2) 0.02064(11) Uani 1 1 d . . . . .
S1 S 0.22057(16) 0.89968(18) 0.60529(15) 0.0238(5) Uani 1 1 d . . . . .
P1 P -0.07082(17) 0.66599(19) 0.74009(15) 0.0224(5) Uani 1 1 d . . . . .
N1 N 0.2876(6) 0.7213(6) 0.5646(5) 0.0251(17) Uani 1 1 d . . . . .
N2 N 0.4081(5) 0.8814(5) 0.5268(4) 0.0185(15) Uani 1 1 d . . . . .
N3 N 0.5817(5) 0.8844(6) 0.4620(5) 0.0251(18) Uani 1 1 d . . . . .
H3A H 0.5887 0.9549 0.4582 0.038 Uiso 1 1 calc R U . . .
H3B H 0.6360 0.8521 0.4423 0.038 Uiso 1 1 calc R U . . .
C1 C 0.3144(6) 0.8244(7) 0.5600(5) 0.0206(19) Uani 1 1 d . . . . .
C2 C 0.3711(7) 0.6681(8) 0.5375(6) 0.033(2) Uani 1 1 d . . . . .
H2 H 0.3578 0.5933 0.5405 0.040 Uiso 1 1 calc R U . . .
C3 C 0.4721(7) 0.7137(7) 0.5062(6) 0.027(2) Uani 1 1 d . . . . .
H3 H 0.5290 0.6715 0.4909 0.032 Uiso 1 1 calc R U . . .
C4 C 0.4884(6) 0.8264(7) 0.4978(6) 0.0206(19) Uani 1 1 d . . . . .
C11 C -0.1935(6) 0.7268(8) 0.7021(6) 0.026(2) Uani 1 1 d . . . . .
C12 C -0.2055(8) 0.8403(8) 0.6851(6) 0.034(2) Uani 1 1 d . . . . .
H12 H -0.1493 0.8848 0.6911 0.041 Uiso 1 1 calc R U . . .
C13 C -0.2979(8) 0.8890(9) 0.6597(7) 0.044(3) Uani 1 1 d . . . . .
H13 H -0.3038 0.9677 0.6458 0.052 Uiso 1 1 calc R U . . .
C14 C -0.3820(8) 0.8256(9) 0.6542(7) 0.039(3) Uani 1 1 d . . . . .
H14 H -0.4484 0.8586 0.6412 0.047 Uiso 1 1 calc R U . . .
C15 C -0.3686(8) 0.7105(8) 0.6679(6) 0.034(2) Uani 1 1 d . . . . .
H15 H -0.4229 0.6671 0.6585 0.041 Uiso 1 1 calc R U . . .
C16 C -0.2768(7) 0.6615(9) 0.6950(7) 0.035(2) Uani 1 1 d . . . . .
H16 H -0.2702 0.5829 0.7088 0.042 Uiso 1 1 calc R U . . .
C21 C -0.0965(7) 0.6390(7) 0.8485(6) 0.028(2) Uani 1 1 d . . . . .
C22 C -0.0153(8) 0.6585(8) 0.8884(6) 0.034(2) Uani 1 1 d . . . . .
H22 H 0.0542 0.6851 0.8584 0.041 Uiso 1 1 calc R U . . .
C23 C -0.0349(9) 0.6395(10) 0.9709(7) 0.046(3) Uani 1 1 d . . . . .
H23 H 0.0214 0.6523 0.9977 0.055 Uiso 1 1 calc R U . . .
C24 C -0.1348(10) 0.6025(10) 1.0145(7) 0.048(3) Uani 1 1 d . . . . .
H24 H -0.1487 0.5916 1.0712 0.058 Uiso 1 1 calc R U . . .
C25 C -0.2148(9) 0.5810(9) 0.9763(8) 0.047(3) Uani 1 1 d . . . . .
H25 H -0.2836 0.5524 1.0068 0.057 Uiso 1 1 calc R U . . .
C26 C -0.1959(8) 0.6006(9) 0.8937(7) 0.041(3) Uani 1 1 d . . . . .
H26 H -0.2527 0.5873 0.8675 0.049 Uiso 1 1 calc R U . . .
C27 C -0.0610(7) 0.5282(7) 0.7294(6) 0.026(2) Uani 1 1 d . . . . .
H27A H -0.1194 0.4769 0.7675 0.031 Uiso 1 1 calc R U . . .
H27B H -0.0690 0.5345 0.6731 0.031 Uiso 1 1 calc R U . . .
C28 C 0.0498(7) 0.4814(8) 0.7486(7) 0.031(2) Uani 1 1 d . . . . .
H28A H 0.1073 0.5289 0.7067 0.038 Uiso 1 1 calc R U . . .
H28B H 0.0609 0.4846 0.8022 0.038 Uiso 1 1 calc R U . . .
N4 N 0.0585(6) 0.3668(6) 0.7505(5) 0.0263(17) Uani 1 1 d . . . . .
H4 H 0.0917 0.3535 0.7074 0.032 Uiso 1 1 calc R U . . .
C29 C 0.0175(7) 0.2822(8) 0.8160(6) 0.026(2) Uani 1 1 d . . . . .
C31 C 0.0278(7) 0.1675(8) 0.8135(6) 0.031(2) Uani 1 1 d . . . . .
C32 C 0.074(2) 0.145(2) 0.7218(15) 0.0375(10) Uiso 0.606(8) 1 d . U P A 1
S2 S -0.0102(4) 0.0604(5) 0.8960(3) 0.0375(10) Uiso 0.606(8) 1 d . U P A 1
S5 S 0.0734(8) 0.1292(8) 0.7426(5) 0.0375(10) Uiso 0.394(8) 1 d . U P A 2
C82 C -0.038(3) 0.055(3) 0.885(2) 0.0375(10) Uiso 0.394(8) 1 d . U P A 2
C33 C 0.0556(8) 0.0109(10) 0.7719(9) 0.052(3) Uani 1 1 d . . . . .
H33 H 0.0747 -0.0395 0.7434 0.063 Uiso 1 1 calc R U . A 1
C34 C 0.0143(10) -0.0323(10) 0.8521(10) 0.068(4) Uani 1 1 d . . . . .
H34 H 0.0007 -0.1103 0.8803 0.082 Uiso 1 1 calc R U . A 1
O1 O -0.0255(5) 0.2959(6) 0.8793(4) 0.0373(17) Uani 1 1 d . . . . .
Au2 Au 0.65251(2) 0.73351(3) 0.33031(2) 0.02048(11) Uani 1 1 d . . . . .
N5 N 0.8057(6) 0.7783(6) 0.4555(5) 0.0269(18) Uani 1 1 d . . . . .
N6 N 0.9198(5) 0.6219(6) 0.4786(5) 0.0220(17) Uani 1 1 d . . . . .
N7 N 1.0789(5) 0.6204(6) 0.5280(5) 0.0264(18) Uani 1 1 d . . . . .
H7A H 1.0860 0.5509 0.5293 0.032 Uiso 1 1 calc R U . . .
H7B H 1.1285 0.6531 0.5437 0.032 Uiso 1 1 calc R U . . .
C41 C 0.8322(6) 0.6773(7) 0.4541(6) 0.023(2) Uani 1 1 d . . . . .
C42 C 0.8823(7) 0.8301(7) 0.4787(6) 0.026(2) Uani 1 1 d . . . . .
H42 H 0.8682 0.9028 0.4805 0.032 Uiso 1 1 calc R U . . .
C43 C 0.9773(7) 0.7862(7) 0.4995(6) 0.025(2) Uani 1 1 d . . . . .
H43 H 1.0302 0.8283 0.5117 0.030 Uiso 1 1 calc R U . . .
C44 C 0.9940(6) 0.6755(7) 0.5023(5) 0.0178(18) Uani 1 1 d . . . . .
S3 S 0.74882(16) 0.60283(18) 0.41669(15) 0.0246(5) Uani 1 1 d . . . . .
P2 P 0.54878(17) 0.84515(19) 0.24392(16) 0.0231(5) Uani 1 1 d . . . . .
C51 C 0.5950(7) 0.8525(7) 0.1399(6) 0.023(2) Uani 1 1 d . . . . .
C52 C 0.7056(8) 0.8444(8) 0.1160(6) 0.028(2) Uani 1 1 d . . . . .
H52 H 0.7541 0.8387 0.1536 0.034 Uiso 1 1 calc R U . . .
C53 C 0.7442(8) 0.8446(8) 0.0405(7) 0.038(3) Uani 1 1 d . . . . .
H53 H 0.8195 0.8396 0.0253 0.046 Uiso 1 1 calc R U . . .
C54 C 0.6738(9) 0.8520(8) -0.0161(7) 0.041(3) Uani 1 1 d . . . . .
H54 H 0.7011 0.8534 -0.0696 0.049 Uiso 1 1 calc R U . . .
C55 C 0.5656(9) 0.8574(8) 0.0069(7) 0.038(3) Uani 1 1 d . . . . .
H55 H 0.5169 0.8571 -0.0294 0.046 Uiso 1 1 calc R U . . .
C56 C 0.5259(8) 0.8632(7) 0.0837(7) 0.033(2) Uani 1 1 d . . . . .
H56 H 0.4515 0.8746 0.0972 0.039 Uiso 1 1 calc R U . . .
C61 C 0.4079(7) 0.7970(8) 0.2712(6) 0.025(2) Uani 1 1 d . . . . .
C62 C 0.3812(7) 0.6875(8) 0.3217(6) 0.030(2) Uani 1 1 d . . . . .
H62 H 0.4368 0.6383 0.3405 0.036 Uiso 1 1 calc R U . . .
C63 C 0.2742(8) 0.6486(10) 0.3451(6) 0.040(3) Uani 1 1 d . . . . .
H63 H 0.2564 0.5730 0.3788 0.048 Uiso 1 1 calc R U . . .
C64 C 0.1928(10) 0.7230(12) 0.3183(8) 0.057(4) Uani 1 1 d . . . . .
H64 H 0.1192 0.6979 0.3348 0.069 Uiso 1 1 calc R U . . .
C65 C 0.2186(8) 0.8300(10) 0.2690(8) 0.045(3) Uani 1 1 d . . . . .
H65 H 0.1628 0.8797 0.2518 0.054 Uiso 1 1 calc R U . . .
C66 C 0.3244(7) 0.8679(9) 0.2437(7) 0.038(3) Uani 1 1 d . . . . .
H66 H 0.3412 0.9424 0.2073 0.046 Uiso 1 1 calc R U . . .
C67 C 0.5454(7) 0.9874(7) 0.2449(6) 0.027(2) Uani 1 1 d . . . . .
H67A H 0.4957 1.0303 0.2078 0.033 Uiso 1 1 calc R U . . .
H67B H 0.5165 0.9857 0.3007 0.033 Uiso 1 1 calc R U . . .
C68 C 0.6572(7) 1.0478(7) 0.2184(7) 0.030(2) Uani 1 1 d . . . . .
H68A H 0.7086 1.0017 0.2522 0.036 Uiso 1 1 calc R U . . .
H68B H 0.6833 1.0560 0.1608 0.036 Uiso 1 1 calc R U . . .
N8 N 0.6548(6) 1.1576(6) 0.2264(5) 0.0289(19) Uani 1 1 d . . . . .
H8 H 0.6853 1.1691 0.2648 0.035 Uiso 1 1 calc R U . . .
C69 C 0.6061(7) 1.2421(8) 0.1753(6) 0.030(2) Uani 1 1 d . . . . .
O2 O 0.5594(5) 1.2305(5) 0.1218(4) 0.0337(16) Uani 1 1 d . . . . .
C71 C 0.6122(7) 1.3513(8) 0.1874(6) 0.030(2) Uani 1 1 d . . . . .
C72 C 0.6701(7) 1.3883(7) 0.2344(6) 0.027(2) Uani 1 1 d . . . . .
H72 H 0.7183 1.3438 0.2679 0.032 Uiso 1 1 calc R U . . .
C73 C 0.6490(8) 1.5019(8) 0.2267(7) 0.039(3) Uani 1 1 d . . . . .
H73 H 0.6823 1.5415 0.2544 0.046 Uiso 1 1 calc R U . . .
C74 C 0.5775(8) 1.5468(8) 0.1763(7) 0.039(3) Uani 1 1 d . . . . .
H74 H 0.5551 1.6217 0.1642 0.047 Uiso 1 1 calc R U . . .
S4 S 0.53035(19) 1.4539(2) 0.13590(17) 0.0338(6) Uani 1 1 d . . . . .
C100 C 0.2710(9) 0.7144(9) 0.0413(7) 0.046(3) Uani 1 1 d . . . . .
H10A H 0.1996 0.6814 0.0419 0.055 Uiso 1 1 calc R U . . .
H10B H 0.3232 0.6984 -0.0009 0.055 Uiso 1 1 calc R U . . .
Cl1 Cl 0.2624(2) 0.8612(2) 0.01618(19) 0.0502(7) Uani 1 1 d . . . . .
Cl2 Cl 0.3124(2) 0.6520(2) 0.13724(18) 0.0409(6) Uani 1 1 d . . . . .
 
loop_
 _atom_site_aniso_label
 _atom_site_aniso_U_11
 _atom_site_aniso_U_22
 _atom_site_aniso_U_33
 _atom_site_aniso_U_23
 _atom_site_aniso_U_13
 _atom_site_aniso_U_12
Au1 0.01011(16) 0.02240(19) 0.0316(2) -0.01236(16) -0.00255(14) 0.00088(12)
S1 0.0109(9) 0.0216(11) 0.0408(15) -0.0145(10) -0.0007(9) 0.0021(8)
P1 0.0124(10) 0.0267(12) 0.0312(14) -0.0140(11) -0.0027(10) -0.0002(9)
N1 0.021(4) 0.023(4) 0.033(5) -0.011(4) -0.005(3) -0.006(3)
N2 0.013(3) 0.018(4) 0.026(4) -0.009(3) -0.005(3) 0.004(3)
N3 0.011(3) 0.021(4) 0.048(5) -0.020(4) 0.003(3) 0.001(3)
C1 0.011(4) 0.027(5) 0.026(5) -0.013(4) 0.000(4) -0.002(3)
C2 0.027(5) 0.021(5) 0.053(7) -0.020(5) 0.009(5) -0.009(4)
C3 0.022(4) 0.020(5) 0.040(6) -0.015(4) 0.003(4) -0.002(4)
C4 0.014(4) 0.022(4) 0.027(5) -0.009(4) -0.005(4) 0.000(3)
C11 0.010(4) 0.044(6) 0.023(5) -0.013(4) 0.001(4) 0.004(4)
C12 0.027(5) 0.036(6) 0.046(7) -0.021(5) -0.007(5) 0.008(4)
C13 0.043(6) 0.042(6) 0.053(8) -0.025(6) -0.012(6) 0.024(5)
C14 0.021(5) 0.059(7) 0.040(7) -0.021(6) -0.003(5) 0.012(5)
C15 0.030(5) 0.038(6) 0.043(7) -0.024(5) -0.010(5) 0.007(4)
C16 0.018(5) 0.045(6) 0.046(7) -0.020(5) -0.008(4) 0.000(4)
C21 0.031(5) 0.020(5) 0.036(6) -0.013(4) -0.009(4) 0.000(4)
C22 0.034(5) 0.038(6) 0.033(6) -0.014(5) -0.008(5) 0.008(4)
C23 0.049(7) 0.051(7) 0.051(8) -0.030(6) -0.020(6) 0.024(6)
C24 0.068(8) 0.050(7) 0.030(7) -0.019(6) -0.004(6) 0.018(6)
C25 0.042(6) 0.046(7) 0.053(8) -0.023(6) 0.014(6) -0.004(5)
C26 0.031(5) 0.049(7) 0.049(8) -0.030(6) 0.006(5) -0.006(5)
C27 0.020(4) 0.021(5) 0.038(6) -0.013(4) -0.002(4) 0.002(4)
C28 0.021(5) 0.028(5) 0.051(7) -0.021(5) -0.009(5) 0.003(4)
N4 0.025(4) 0.029(4) 0.027(5) -0.015(4) 0.003(3) -0.001(3)
C29 0.018(4) 0.033(5) 0.028(6) -0.014(5) 0.000(4) 0.001(4)
C31 0.023(5) 0.031(5) 0.042(7) -0.015(5) -0.008(4) 0.002(4)
C33 0.028(6) 0.049(7) 0.096(11) -0.044(8) -0.011(6) 0.009(5)
C34 0.049(7) 0.027(6) 0.105(13) -0.001(7) 0.004(8) 0.001(5)
O1 0.032(4) 0.045(4) 0.039(4) -0.025(4) 0.006(3) -0.008(3)
Au2 0.01236(17) 0.02127(19) 0.0326(2) -0.01389(16) -0.00749(14) 0.00451(12)
N5 0.022(4) 0.025(4) 0.045(5) -0.023(4) -0.012(4) 0.010(3)
N6 0.011(3) 0.023(4) 0.036(5) -0.014(4) -0.007(3) 0.003(3)
N7 0.016(4) 0.025(4) 0.051(6) -0.023(4) -0.020(4) 0.008(3)
C41 0.016(4) 0.015(4) 0.033(6) -0.002(4) -0.003(4) 0.002(3)
C42 0.032(5) 0.021(5) 0.033(6) -0.016(4) -0.013(4) 0.010(4)
C43 0.025(5) 0.020(4) 0.036(6) -0.015(4) -0.010(4) 0.004(4)
C44 0.018(4) 0.020(4) 0.018(5) -0.007(4) -0.007(4) 0.000(3)
S3 0.0153(10) 0.0202(11) 0.0412(15) -0.0121(10) -0.0095(10) 0.0030(8)
P2 0.0148(10) 0.0225(12) 0.0368(15) -0.0149(11) -0.0071(10) 0.0029(9)
C51 0.020(4) 0.018(4) 0.036(6) -0.014(4) -0.006(4) 0.003(3)
C52 0.034(5) 0.030(5) 0.026(6) -0.015(4) -0.006(4) 0.006(4)
C53 0.035(6) 0.032(6) 0.046(7) -0.014(5) 0.000(5) -0.001(4)
C54 0.050(7) 0.036(6) 0.039(7) -0.019(5) 0.000(5) 0.003(5)
C55 0.046(6) 0.037(6) 0.041(7) -0.019(5) -0.021(5) -0.004(5)
C56 0.029(5) 0.024(5) 0.048(7) -0.013(5) -0.013(5) 0.003(4)
C61 0.018(4) 0.030(5) 0.036(6) -0.023(5) -0.009(4) 0.005(4)
C62 0.018(4) 0.046(6) 0.025(6) -0.012(5) -0.007(4) 0.001(4)
C63 0.029(5) 0.058(7) 0.026(6) -0.008(5) -0.001(5) -0.022(5)
C64 0.037(7) 0.097(11) 0.045(8) -0.033(8) -0.005(6) -0.013(7)
C65 0.020(5) 0.051(7) 0.078(9) -0.031(7) -0.028(6) 0.014(5)
C66 0.022(5) 0.037(6) 0.060(8) -0.022(6) -0.008(5) 0.005(4)
C67 0.018(4) 0.027(5) 0.039(6) -0.016(4) 0.000(4) 0.002(4)
C68 0.024(5) 0.025(5) 0.049(7) -0.022(5) -0.009(4) -0.001(4)
N8 0.030(4) 0.025(4) 0.040(5) -0.018(4) -0.016(4) 0.003(3)
C69 0.018(4) 0.033(5) 0.044(7) -0.020(5) -0.008(4) 0.008(4)
O2 0.035(4) 0.036(4) 0.039(4) -0.020(3) -0.015(3) 0.011(3)
C71 0.015(4) 0.026(5) 0.048(7) -0.014(5) -0.004(4) 0.005(4)
C72 0.022(5) 0.026(5) 0.032(6) -0.008(4) -0.007(4) 0.003(4)
C73 0.025(5) 0.030(5) 0.070(8) -0.028(6) -0.009(5) 0.002(4)
C74 0.036(6) 0.021(5) 0.064(8) -0.019(5) -0.012(5) 0.007(4)
S4 0.0273(12) 0.0272(12) 0.0473(17) -0.0122(12) -0.0084(12) 0.0065(10)
C100 0.034(6) 0.044(7) 0.054(8) -0.014(6) 0.002(5) -0.006(5)
Cl1 0.0363(14) 0.0497(17) 0.056(2) -0.0092(14) -0.0047(13) 0.0122(12)
Cl2 0.0325(13) 0.0381(14) 0.0501(18) -0.0110(13) -0.0100(12) -0.0040(11)
 
_geom_special_details
;
 All esds (except the esd in the dihedral angle between two l.s. planes)
 are estimated using the full covariance matrix.  The cell esds are taken
 into account individually in the estimation of esds in distances, angles
 and torsion angles; correlations between esds in cell parameters are only
 used when they are defined by crystal symmetry.  An approximate (isotropic)
 treatment of cell esds is used for estimating esds involving l.s. planes.
;
 
loop_
 _geom_bond_atom_site_label_1
 _geom_bond_atom_site_label_2
 _geom_bond_distance
 _geom_bond_site_symmetry_2
 _geom_bond_publ_flag
Au1 P1 2.256(2) . ?
Au1 S1 2.296(2) . ?
S1 C1 1.777(8) . ?
P1 C21 1.803(10) . ?
P1 C11 1.825(9) . ?
P1 C27 1.826(8) . ?
N1 C1 1.330(11) . ?
N1 C2 1.357(11) . ?
N2 C1 1.331(10) . ?
N2 C4 1.357(10) . ?
N3 C4 1.340(10) . ?
C2 C3 1.355(12) . ?
C3 C4 1.404(11) . ?
C11 C12 1.380(13) . ?
C11 C16 1.390(12) . ?
C12 C13 1.368(13) . ?
C13 C14 1.371(15) . ?
C14 C15 1.412(14) . ?
C15 C16 1.371(13) . ?
C21 C26 1.372(13) . ?
C21 C22 1.389(13) . ?
C22 C23 1.377(14) . ?
C23 C24 1.365(16) . ?
C24 C25 1.367(16) . ?
C25 C26 1.376(15) . ?
C27 C28 1.542(12) . ?
C28 N4 1.450(11) . ?
N4 C29 1.320(12) . ?
C29 O1 1.234(11) . ?
C29 C31 1.477(13) . ?
C31 S5 1.527(13) . ?
C31 S2 1.629(12) . ?
C31 C82 1.68(3) . ?
C31 C32 1.76(3) . ?
C32 C33 1.63(3) . ?
S2 C34 1.622(15) . ?
S5 C33 1.422(15) . ?
C82 C34 1.51(3) . ?
C33 C34 1.352(18) . ?
Au2 P2 2.256(2) . ?
Au2 S3 2.302(2) . ?
N5 C41 1.330(10) . ?
N5 C42 1.357(11) . ?
N6 C41 1.342(10) . ?
N6 C44 1.354(10) . ?
N7 C44 1.317(10) . ?
C41 S3 1.757(9) . ?
C42 C43 1.356(12) . ?
C43 C44 1.406(11) . ?
P2 C51 1.812(10) . ?
P2 C67 1.816(9) . ?
P2 C61 1.817(9) . ?
C51 C56 1.382(13) . ?
C51 C52 1.402(12) . ?
C52 C53 1.348(13) . ?
C53 C54 1.406(15) . ?
C54 C55 1.365(14) . ?
C55 C56 1.398(14) . ?
C61 C62 1.385(13) . ?
C61 C66 1.404(12) . ?
C62 C63 1.388(13) . ?
C63 C64 1.404(17) . ?
C64 C65 1.353(17) . ?
C65 C66 1.373(14) . ?
C67 C68 1.537(12) . ?
C68 N8 1.450(11) . ?
N8 C69 1.351(12) . ?
C69 O2 1.232(11) . ?
C69 C71 1.479(13) . ?
C71 C72 1.377(13) . ?
C71 S4 1.735(9) . ?
C72 C73 1.429(12) . ?
C73 C74 1.340(14) . ?
C74 S4 1.725(10) . ?
C100 Cl2 1.758(12) . ?
C100 Cl1 1.772(11) . ?
 
loop_
 _geom_angle_atom_site_label_1
 _geom_angle_atom_site_label_2
 _geom_angle_atom_site_label_3
 _geom_angle
 _geom_angle_site_symmetry_1
 _geom_angle_site_symmetry_3
 _geom_angle_publ_flag
P1 Au1 S1 176.02(7) . . ?
C1 S1 Au1 106.1(3) . . ?
C21 P1 C11 105.3(4) . . ?
C21 P1 C27 105.4(4) . . ?
C11 P1 C27 107.5(4) . . ?
C21 P1 Au1 114.4(3) . . ?
C11 P1 Au1 112.1(3) . . ?
C27 P1 Au1 111.7(3) . . ?
C1 N1 C2 113.3(7) . . ?
C1 N2 C4 116.7(7) . . ?
N1 C1 N2 127.9(7) . . ?
N1 C1 S1 119.5(6) . . ?
N2 C1 S1 112.5(6) . . ?
C3 C2 N1 124.9(8) . . ?
C2 C3 C4 116.6(8) . . ?
N3 C4 N2 116.9(7) . . ?
N3 C4 C3 122.9(8) . . ?
N2 C4 C3 120.2(7) . . ?
C12 C11 C16 119.6(8) . . ?
C12 C11 P1 118.2(7) . . ?
C16 C11 P1 122.0(7) . . ?
C13 C12 C11 120.5(10) . . ?
C12 C13 C14 120.7(10) . . ?
C13 C14 C15 119.0(9) . . ?
C16 C15 C14 119.7(9) . . ?
C15 C16 C11 120.0(10) . . ?
C26 C21 C22 118.1(10) . . ?
C26 C21 P1 121.6(8) . . ?
C22 C21 P1 120.3(8) . . ?
C23 C22 C21 120.5(10) . . ?
C24 C23 C22 120.3(11) . . ?
C23 C24 C25 119.7(11) . . ?
C24 C25 C26 120.2(11) . . ?
C21 C26 C25 121.1(11) . . ?
C28 C27 P1 109.1(6) . . ?
N4 C28 C27 112.1(7) . . ?
C29 N4 C28 121.0(8) . . ?
O1 C29 N4 122.1(9) . . ?
O1 C29 C31 119.5(9) . . ?
N4 C29 C31 118.3(8) . . ?
C29 C31 S5 129.5(9) . . ?
C29 C31 S2 119.7(8) . . ?
C29 C31 C82 123.6(13) . . ?
S5 C31 C82 105.4(13) . . ?
C29 C31 C32 121.1(11) . . ?
S2 C31 C32 119.1(10) . . ?
C33 C32 C31 88.1(13) . . ?
C34 S2 C31 95.0(7) . . ?
C33 S5 C31 105.8(8) . . ?
C34 C82 C31 97.4(19) . . ?
C34 C33 S5 113.7(10) . . ?
C34 C33 C32 123.4(13) . . ?
C33 C34 C82 112.7(16) . . ?
C33 C34 S2 114.3(9) . . ?
P2 Au2 S3 173.55(8) . . ?
C41 N5 C42 113.5(7) . . ?
C41 N6 C44 118.0(7) . . ?
N5 C41 N6 126.9(8) . . ?
N5 C41 S3 120.0(6) . . ?
N6 C41 S3 113.1(6) . . ?
C43 C42 N5 125.2(8) . . ?
C42 C43 C44 116.9(8) . . ?
N7 C44 N6 118.0(7) . . ?
N7 C44 C43 122.8(8) . . ?
N6 C44 C43 119.2(7) . . ?
C41 S3 Au2 106.6(3) . . ?
C51 P2 C67 107.7(4) . . ?
C51 P2 C61 108.6(4) . . ?
C67 P2 C61 103.6(4) . . ?
C51 P2 Au2 111.0(3) . . ?
C67 P2 Au2 113.6(3) . . ?
C61 P2 Au2 111.9(3) . . ?
C56 C51 C52 118.6(9) . . ?
C56 C51 P2 123.0(7) . . ?
C52 C51 P2 118.4(7) . . ?
C53 C52 C51 121.1(9) . . ?
C52 C53 C54 120.5(10) . . ?
C55 C54 C53 119.1(10) . . ?
C54 C55 C56 120.4(10) . . ?
C51 C56 C55 120.0(9) . . ?
C62 C61 C66 118.6(8) . . ?
C62 C61 P2 119.4(7) . . ?
C66 C61 P2 122.0(7) . . ?
C61 C62 C63 120.8(9) . . ?
C62 C63 C64 118.9(10) . . ?
C65 C64 C63 120.4(11) . . ?
C64 C65 C66 120.9(10) . . ?
C65 C66 C61 120.3(10) . . ?
C68 C67 P2 112.7(6) . . ?
N8 C68 C67 112.0(7) . . ?
C69 N8 C68 120.4(8) . . ?
O2 C69 N8 122.9(9) . . ?
O2 C69 C71 121.4(9) . . ?
N8 C69 C71 115.6(9) . . ?
C72 C71 C69 132.0(9) . . ?
C72 C71 S4 111.5(7) . . ?
C69 C71 S4 116.5(7) . . ?
C71 C72 C73 111.8(8) . . ?
C74 C73 C72 113.1(9) . . ?
C73 C74 S4 112.7(7) . . ?
C74 S4 C71 90.9(5) . . ?
Cl2 C100 Cl1 111.3(6) . . ?
 
loop_
 _geom_hbond_atom_site_label_D 
 _geom_hbond_atom_site_label_H 
 _geom_hbond_atom_site_label_A 
 _geom_hbond_distance_DH 
 _geom_hbond_distance_HA 
 _geom_hbond_distance_DA 
 _geom_hbond_angle_DHA 
 _geom_hbond_site_symmetry_A 
N3 H3B N5  0.88 2.32 3.103(9) 147.5 .
N3 H3A N2  0.88 2.19 3.059(9) 169.1 2_676
N7 H7A N6  0.88 2.25 3.124(10) 170.3 2_766
 
_refine_diff_density_max    3.883
_refine_diff_density_min   -1.534
_refine_diff_density_rms    0.237

_shelx_res_file
;

    LOL149AS.res created by SHELXL-2014/7


TITL lol149as in P-1
CELL 0.71073  12.5380  12.7206  17.6450  69.941  81.474  89.259
ZERR    2.00   0.0036   0.0036   0.0051   0.005   0.005   0.005
LATT 1
SFAC C  H  N  O  P  S  Au Cl
UNIT 94 90 16 4 4 8 4 4
LIST 4 ! automatically inserted. Change 6 to 4 for CHECKCIF!!
OMIT 0 0 1
OMIT  -2.00  52.00
L.S. 10
ACTA
BOND
FMAP 2
PLAN 30
SIZE 0.04 0.12 0.24
HTAB N3 N5
EQIV_$1 -x+1,-y+2,-z+1
EQIV_$2 -x+2,-y+1,-z+1
HTAB N3 N2_$1
HTAB N7 N6_$2
TEMP -173
WGHT    0.070800
FVAR       0.21581   0.60608   0.03746
AU1   7    0.077337    0.776613    0.673983    11.00000    0.01011    0.02240 =
         0.03158   -0.01236   -0.00255    0.00088
S1    6    0.220571    0.899680    0.605288    11.00000    0.01091    0.02165 =
         0.04084   -0.01453   -0.00070    0.00213
P1    5   -0.070816    0.665986    0.740090    11.00000    0.01237    0.02671 =
         0.03118   -0.01403   -0.00271   -0.00024
N1    3    0.287599    0.721338    0.564640    11.00000    0.02053    0.02340 =
         0.03252   -0.01066   -0.00484   -0.00560
N2    3    0.408050    0.881360    0.526812    11.00000    0.01256    0.01831 =
         0.02642   -0.00914   -0.00539    0.00401
N3    3    0.581735    0.884419    0.461968    11.00000    0.01057    0.02112 =
         0.04771   -0.01995    0.00292    0.00072
AFIX  93
H3A   2    0.588723    0.954871    0.458168    11.00000   -1.50000
H3B   2    0.636025    0.852061    0.442264    11.00000   -1.50000
AFIX   0
C1    1    0.314431    0.824428    0.560016    11.00000    0.01082    0.02716 =
         0.02627   -0.01345    0.00042   -0.00160
C2    1    0.371148    0.668113    0.537455    11.00000    0.02666    0.02111 =
         0.05281   -0.02031    0.00935   -0.00873
AFIX  43
H2    2    0.357843    0.593296    0.540533    11.00000   -1.20000
AFIX   0
C3    1    0.472124    0.713699    0.506249    11.00000    0.02207    0.02011 =
         0.03964   -0.01545    0.00349   -0.00250
AFIX  43
H3    2    0.529022    0.671539    0.490887    11.00000   -1.20000
AFIX   0
C4    1    0.488398    0.826396    0.497770    11.00000    0.01392    0.02232 =
         0.02695   -0.00949   -0.00498   -0.00011
C11   1   -0.193486    0.726836    0.702147    11.00000    0.00977    0.04416 =
         0.02256   -0.01259    0.00084    0.00424
C12   1   -0.205507    0.840275    0.685121    11.00000    0.02724    0.03594 =
         0.04592   -0.02132   -0.00709    0.00804
AFIX  43
H12   2   -0.149252    0.884790    0.691091    11.00000   -1.20000
AFIX   0
C13   1   -0.297891    0.889035    0.659708    11.00000    0.04349    0.04162 =
         0.05309   -0.02464   -0.01222    0.02398
AFIX  43
H13   2   -0.303814    0.967724    0.645753    11.00000   -1.20000
AFIX   0
C14   1   -0.382034    0.825593    0.654154    11.00000    0.02105    0.05945 =
         0.03951   -0.02131   -0.00330    0.01246
AFIX  43
H14   2   -0.448410    0.858614    0.641238    11.00000   -1.20000
AFIX   0
C15   1   -0.368560    0.710452    0.667919    11.00000    0.02967    0.03829 =
         0.04320   -0.02430   -0.01019    0.00681
AFIX  43
H15   2   -0.422870    0.667073    0.658468    11.00000   -1.20000
AFIX   0
C16   1   -0.276804    0.661531    0.694973    11.00000    0.01789    0.04503 =
         0.04638   -0.01996   -0.00780    0.00001
AFIX  43
H16   2   -0.270169    0.582934    0.708826    11.00000   -1.20000
AFIX   0
C21   1   -0.096450    0.638975    0.848490    11.00000    0.03068    0.02048 =
         0.03584   -0.01326   -0.00920    0.00002
C22   1   -0.015318    0.658492    0.888359    11.00000    0.03398    0.03830 =
         0.03265   -0.01400   -0.00791    0.00786
AFIX  43
H22   2    0.054230    0.685119    0.858418    11.00000   -1.20000
AFIX   0
C23   1   -0.034922    0.639544    0.970937    11.00000    0.04893    0.05102 =
         0.05131   -0.02962   -0.01994    0.02418
AFIX  43
H23   2    0.021362    0.652341    0.997722    11.00000   -1.20000
AFIX   0
C24   1   -0.134838    0.602459    1.014518    11.00000    0.06799    0.04969 =
         0.03016   -0.01917   -0.00393    0.01766
AFIX  43
H24   2   -0.148732    0.591637    1.071150    11.00000   -1.20000
AFIX   0
C25   1   -0.214810    0.580968    0.976289    11.00000    0.04153    0.04565 =
         0.05258   -0.02297    0.01363   -0.00437
AFIX  43
H25   2   -0.283608    0.552427    1.006846    11.00000   -1.20000
AFIX   0
C26   1   -0.195907    0.600567    0.893686    11.00000    0.03144    0.04903 =
         0.04943   -0.02987    0.00615   -0.00644
AFIX  43
H26   2   -0.252654    0.587292    0.867492    11.00000   -1.20000
AFIX   0
C27   1   -0.060982    0.528221    0.729435    11.00000    0.01997    0.02092 =
         0.03829   -0.01318   -0.00224    0.00188
AFIX  23
H27A  2   -0.119419    0.476885    0.767510    11.00000   -1.20000
H27B  2   -0.068973    0.534494    0.673080    11.00000   -1.20000
AFIX   0
C28   1    0.049795    0.481402    0.748637    11.00000    0.02147    0.02793 =
         0.05149   -0.02094   -0.00856    0.00327
AFIX  23
H28A  2    0.107350    0.528950    0.706697    11.00000   -1.20000
H28B  2    0.060893    0.484638    0.802199    11.00000   -1.20000
AFIX   0
N4    3    0.058506    0.366814    0.750532    11.00000    0.02515    0.02917 =
         0.02674   -0.01518    0.00341   -0.00106
AFIX  43
H4    2    0.091675    0.353468    0.707384    11.00000   -1.20000
AFIX   0
C29   1    0.017471    0.282180    0.815958    11.00000    0.01801    0.03282 =
         0.02771   -0.01363   -0.00028    0.00145
C31   1    0.027809    0.167518    0.813510    11.00000    0.02350    0.03126 =
         0.04183   -0.01523   -0.00770    0.00200
PART 1
C32   1    0.074178    0.144531    0.721835    21.00000   31.00000
S2    6   -0.010176    0.060408    0.896007    21.00000   31.00000
PART 2
S5    6    0.073444    0.129195    0.742582   -21.00000   31.00000
C82   1   -0.038159    0.054552    0.884550   -21.00000   31.00000
PART 0
C33   1    0.055570    0.010889    0.771942    11.00000    0.02786    0.04873 =
         0.09565   -0.04386   -0.01138    0.00936
AFIX  43
H33   2    0.074729   -0.039452    0.743413    11.00000   -1.20000
AFIX   0
C34   1    0.014260   -0.032277    0.852075    11.00000    0.04932    0.02705 =
         0.10538   -0.00086    0.00353    0.00098
AFIX  43
H34   2    0.000677   -0.110314    0.880296    11.00000   -1.20000
AFIX   0
O1    4   -0.025545    0.295908    0.879289    11.00000    0.03232    0.04546 =
         0.03894   -0.02533    0.00645   -0.00764
AU2   7    0.652514    0.733511    0.330311    11.00000    0.01236    0.02127 =
         0.03264   -0.01389   -0.00749    0.00451
N5    3    0.805666    0.778345    0.455458    11.00000    0.02190    0.02486 =
         0.04480   -0.02316   -0.01221    0.01023
N6    3    0.919778    0.621925    0.478626    11.00000    0.01105    0.02294 =
         0.03629   -0.01416   -0.00739    0.00318
N7    3    1.078929    0.620392    0.527962    11.00000    0.01616    0.02455 =
         0.05089   -0.02302   -0.01992    0.00753
AFIX  93
H7A   2    1.086048    0.550871    0.529349    11.00000   -1.20000
H7B   2    1.128519    0.653098    0.543726    11.00000   -1.20000
AFIX   0
C41   1    0.832202    0.677343    0.454078    11.00000    0.01624    0.01550 =
         0.03292   -0.00165   -0.00333    0.00233
C42   1    0.882264    0.830108    0.478701    11.00000    0.03244    0.02080 =
         0.03307   -0.01562   -0.01273    0.01017
AFIX  43
H42   2    0.868175    0.902831    0.480522    11.00000   -1.20000
AFIX   0
C43   1    0.977306    0.786211    0.499526    11.00000    0.02490    0.02002 =
         0.03615   -0.01514   -0.00969    0.00378
AFIX  43
H43   2    1.030171    0.828312    0.511693    11.00000   -1.20000
AFIX   0
C44   1    0.994037    0.675504    0.502287    11.00000    0.01782    0.02002 =
         0.01753   -0.00735   -0.00655   -0.00007
S3    6    0.748817    0.602834    0.416687    11.00000    0.01527    0.02019 =
         0.04118   -0.01207   -0.00947    0.00303
P2    5    0.548777    0.845151    0.243917    11.00000    0.01476    0.02249 =
         0.03683   -0.01489   -0.00713    0.00288
C51   1    0.594983    0.852471    0.139903    11.00000    0.02031    0.01769 =
         0.03552   -0.01374   -0.00631    0.00321
C52   1    0.705588    0.844385    0.115978    11.00000    0.03357    0.03011 =
         0.02570   -0.01544   -0.00602    0.00552
AFIX  43
H52   2    0.754145    0.838693    0.153607    11.00000   -1.20000
AFIX   0
C53   1    0.744191    0.844551    0.040469    11.00000    0.03497    0.03230 =
         0.04592   -0.01449   -0.00045   -0.00068
AFIX  43
H53   2    0.819512    0.839568    0.025328    11.00000   -1.20000
AFIX   0
C54   1    0.673768    0.852047   -0.016070    11.00000    0.04982    0.03605 =
         0.03911   -0.01947   -0.00013    0.00348
AFIX  43
H54   2    0.701140    0.853377   -0.069575    11.00000   -1.20000
AFIX   0
C55   1    0.565567    0.857388    0.006945    11.00000    0.04623    0.03686 =
         0.04052   -0.01888   -0.02083   -0.00385
AFIX  43
H55   2    0.516862    0.857121   -0.029424    11.00000   -1.20000
AFIX   0
C56   1    0.525935    0.863248    0.083691    11.00000    0.02901    0.02358 =
         0.04790   -0.01313   -0.01328    0.00343
AFIX  43
H56   2    0.451524    0.874641    0.097202    11.00000   -1.20000
AFIX   0
C61   1    0.407892    0.796963    0.271250    11.00000    0.01778    0.03048 =
         0.03592   -0.02258   -0.00867    0.00548
C62   1    0.381191    0.687476    0.321701    11.00000    0.01804    0.04650 =
         0.02517   -0.01187   -0.00705    0.00102
AFIX  43
H62   2    0.436803    0.638313    0.340524    11.00000   -1.20000
AFIX   0
C63   1    0.274209    0.648640    0.345124    11.00000    0.02949    0.05815 =
         0.02637   -0.00758   -0.00083   -0.02153
AFIX  43
H63   2    0.256368    0.573006    0.378768    11.00000   -1.20000
AFIX   0
C64   1    0.192797    0.722958    0.318281    11.00000    0.03721    0.09686 =
         0.04504   -0.03282   -0.00523   -0.01325
AFIX  43
H64   2    0.119173    0.697943    0.334782    11.00000   -1.20000
AFIX   0
C65   1    0.218637    0.830028    0.269033    11.00000    0.01995    0.05078 =
         0.07784   -0.03130   -0.02766    0.01390
AFIX  43
H65   2    0.162768    0.879701    0.251774    11.00000   -1.20000
AFIX   0
C66   1    0.324430    0.867885    0.243661    11.00000    0.02190    0.03727 =
         0.05970   -0.02170   -0.00777    0.00502
AFIX  43
H66   2    0.341245    0.942391    0.207278    11.00000   -1.20000
AFIX   0
C67   1    0.545369    0.987443    0.244884    11.00000    0.01803    0.02653 =
         0.03932   -0.01610    0.00000    0.00246
AFIX  23
H67A  2    0.495735    1.030313    0.207796    11.00000   -1.20000
H67B  2    0.516484    0.985682    0.300674    11.00000   -1.20000
AFIX   0
C68   1    0.657215    1.047801    0.218376    11.00000    0.02410    0.02523 =
         0.04861   -0.02204   -0.00944   -0.00133
AFIX  23
H68A  2    0.708613    1.001720    0.252241    11.00000   -1.20000
H68B  2    0.683309    1.055979    0.160791    11.00000   -1.20000
AFIX   0
N8    3    0.654829    1.157553    0.226399    11.00000    0.03007    0.02544 =
         0.04017   -0.01827   -0.01649    0.00343
AFIX  43
H8    2    0.685304    1.169127    0.264834    11.00000   -1.20000
AFIX   0
C69   1    0.606132    1.242138    0.175260    11.00000    0.01827    0.03338 =
         0.04446   -0.01963   -0.00778    0.00823
O2    4    0.559410    1.230518    0.121772    11.00000    0.03460    0.03586 =
         0.03909   -0.02015   -0.01458    0.01051
C71   1    0.612170    1.351255    0.187350    11.00000    0.01535    0.02642 =
         0.04788   -0.01354   -0.00360    0.00458
C72   1    0.670146    1.388299    0.234380    11.00000    0.02220    0.02557 =
         0.03172   -0.00795   -0.00702    0.00280
AFIX  43
H72   2    0.718329    1.343782    0.267882    11.00000   -1.20000
AFIX   0
C73   1    0.649013    1.501898    0.226661    11.00000    0.02496    0.03011 =
         0.07002   -0.02848   -0.00925    0.00185
AFIX  43
H73   2    0.682295    1.541513    0.254387    11.00000   -1.20000
AFIX   0
C74   1    0.577474    1.546793    0.176330    11.00000    0.03633    0.02106 =
         0.06357   -0.01884   -0.01156    0.00670
AFIX  43
H74   2    0.555117    1.621662    0.164214    11.00000   -1.20000
AFIX   0
S4    6    0.530351    1.453874    0.135900    11.00000    0.02733    0.02715 =
         0.04728   -0.01222   -0.00836    0.00647
C100  1    0.271021    0.714354    0.041340    11.00000    0.03445    0.04375 =
         0.05446   -0.01370    0.00183   -0.00646
AFIX  23
H10A  2    0.199643    0.681450    0.041937    11.00000   -1.20000
H10B  2    0.323158    0.698359   -0.000890    11.00000   -1.20000
AFIX   0
CL1   8    0.262384    0.861248    0.016176    11.00000    0.03633    0.04966 =
         0.05635   -0.00921   -0.00475    0.01216
CL2   8    0.312372    0.651951    0.137237    11.00000    0.03248    0.03807 =
         0.05007   -0.01095   -0.00999   -0.00398
HKLF 4

REM  lol149as in P-1
REM R1 =  0.0556 for    7887 Fo > 4sig(Fo)  and  0.0759 for all   10187 data
REM    600 parameters refined using      0 restraints

END

WGHT      0.0707      0.0000

REM Highest difference peak  3.883,  deepest hole -1.534,  1-sigma level  0.237
Q1    1   0.6584  0.7054  0.3890  11.00000  0.05    3.88
Q2    1   0.0760  0.7418  0.7336  11.00000  0.05    3.87
Q3    1   0.0798  0.8082  0.6158  11.00000  0.05    3.81
Q4    1   0.6492  0.7659  0.2741  11.00000  0.05    3.57
Q5    1   0.0303  0.7170  0.6841  11.00000  0.05    3.06
Q6    1   0.7010  0.7955  0.3161  11.00000  0.05    3.02
Q7    1   0.6061  0.6779  0.3412  11.00000  0.05    3.02
Q8    1   0.1265  0.8322  0.6612  11.00000  0.05    2.82
Q9    1   0.5465  0.6422  0.4012  11.00000  0.05    1.10
Q10   1   0.6157  0.6851  0.4373  11.00000  0.05    1.10
Q11   1   0.7536  0.8201  0.2587  11.00000  0.05    1.03
Q12   1  -0.0826  0.6464  0.7949  11.00000  0.05    0.97
Q13   1   0.2192  0.8487  0.6659  11.00000  0.05    0.92
Q14   1   0.2181  0.9225  0.5502  11.00000  0.05    0.89
Q15   1   0.1359  0.6851  0.7584  11.00000  0.05    0.89
Q16   1   0.5582  0.8484  0.1864  11.00000  0.05    0.88
Q17   1   0.0407  0.7122  0.6201  11.00000  0.05    0.85
Q18   1   0.0781  0.1399  0.6265  11.00000  0.05    0.81
Q19   1  -0.0138  0.7988  0.7449  11.00000  0.05    0.78
Q20   1   0.6253  0.5813  0.4417  11.00000  0.05    0.78
Q21   1   0.2686  0.8970 -0.0516  11.00000  0.05    0.77
Q22   1  -0.0618  0.6954  0.6852  11.00000  0.05    0.77
Q23   1   1.0480  0.8125  0.5618  11.00000  0.05    0.75
Q24   1   0.4526  0.8492  0.0296  11.00000  0.05    0.75
Q25   1   0.4077  0.7633  0.3170  11.00000  0.05    0.75
Q26   1  -0.0393  0.6651  0.7000  11.00000  0.05    0.73
Q27   1   0.0885  0.9163  0.5642  11.00000  0.05    0.72
Q28   1   0.7334  0.7131  0.2494  11.00000  0.05    0.72
Q29   1   0.5928  0.9135  0.2358  11.00000  0.05    0.72
Q30   1   0.7014  0.5472  0.4258  11.00000  0.05    0.71
;
_shelx_res_checksum   76971

_shelx_hkl_file
;
  -1   0   0    9.43    1.63   3
  -1   0   0   22.04    2.05   2
  -2   0   0  288.85   20.72   2
  -2   0   0  317.65   19.01   1
  -2   0   0  262.82   21.35   3
  -3   0   0 3952.09  287.13   3
  -3   0   0 4290.75  278.65   2
  -3   0   0 4356.38  252.28   1
  -4   0   0   98.84   11.54   3
  -4   0   0  112.21   10.12   1
  -4   0   0  116.98   11.35   2
  -5   0   0  443.09   32.39   2
  -5   0   0  432.57   33.85   3
  -5   0   0  417.96   29.24   1
  -6   0   0  166.39   15.02   1
  -6   0   0  186.36   16.77   2
  -6   0   0  157.68   17.34   3
  -7   0   0 2296.97  168.68   3
  -7   0   0 2424.12  163.22   2
  -7   0   0 2486.16  147.82   1
  -8   0   0  458.87   35.13   2
  -8   0   0  407.79   36.32   3
  -8   0   0  431.30   31.40   1
  -9   0   0   80.77   15.11   3
  -9   0   0   89.36   13.91   2
  -9   0   0  113.83   13.45   1
 -10   0   0  273.24   22.70   1
 -10   0   0  273.19   25.62   2
 -10   0   0  221.15   26.95   3
 -11   0   0  479.39   36.70   1
 -11   0   0  534.18   45.18   3
 -11   0   0  461.20   41.27   2
 -12   0   0  468.76   36.95   1
 -12   0   0  501.57   45.48   3
  13   0   0   64.83   17.23   3
 -13   0   0   53.37   12.82   1
  14   0   0  427.72   43.52   3
 -14   1   0  186.66   21.71   1
 -13   1   0    7.87   10.57   1
  13  -1   0    7.60   10.93   3
  12  -1   0  674.83   55.47   3
 -12   1   0  600.29   45.90   1
 -11   1   0   69.38   15.22   2
 -11   1   0   64.88   13.23   1
 -11   1   0   62.36   16.19   3
 -10   1   0  473.79   36.98   1
 -10   1   0  518.45   43.49   3
 -10   1   0  525.80   42.09   2
  -9   1   0 1455.38  103.65   2
  -9   1   0 1521.52  106.79   3
  -9   1   0 1402.23   92.73   1
  -8   1   0   84.35   13.60   2
  -8   1   0   78.71   11.54   1
  -8   1   0   85.69   13.16   3
  -7   1   0  562.10   37.87   1
  -7   1   0  573.75   42.90   2
  -7   1   0  515.33   42.79   3
  -6   1   0   90.16   11.97   2
  -6   1   0   75.00   10.08   1
  -6   1   0   78.24   10.91   3
  -5   1   0  806.36   61.17   3
  -5   1   0  850.18   60.17   2
  -5   1   0  889.41   54.34   1
  -4   1   0   19.33    4.99   1
  -4   1   0   27.31    5.49   3
  -4   1   0   36.07    6.59   2
  -3   1   0   73.24    7.61   1
  -3   1   0   66.61    7.75   3
  -3   1   0   89.61    9.21   2
  -2   1   0  672.00   42.98   2
  -2   1   0  558.30   43.24   3
  -2   1   0  634.12   38.74   1
   1  -1   0   12.57    2.68   4
  -1   1   0   17.36    2.75   2
   1  -1   0   18.72    3.30   1
   0  -1   0   18.14    2.88   1
   0   1   0   10.79    1.88   2
  -1  -1   0  301.83   21.55   3
  -1  -1   0  294.41   19.84   1
  -2  -1   0 1063.00   75.60   3
   2   1   0 1135.11   73.60   2
  -2  -1   0 1054.60   66.39   1
  -3  -1   0   28.71    5.80   3
   3   1   0   17.50    5.69   2
  -3  -1   0   32.43    5.42   1
   4   1   0  316.62   24.57   2
  -4  -1   0  280.56   24.47   3
  -4  -1   0  295.23   20.84   1
  -5  -1   0 1806.32  113.37   1
  -5  -1   0 1951.89  130.37   3
   5   1   0 1789.71  126.88   2
   6   1   0  243.19   23.38   2
  -6  -1   0  244.16   22.97   3
  -6  -1   0  234.08   18.73   1
  -7  -1   0  164.65   15.32   1
   7   1   0  183.60   20.05   2
  -7  -1   0  162.10   18.82   3
   8   1   0    6.69    9.14   2
  -8  -1   0    9.95    6.31   1
  -8  -1   0   13.17    8.78   3
   9   1   0  784.85   61.96   2
  -9  -1   0  795.95   53.00   1
  -9  -1   0  792.72   62.51   3
 -10  -1   0  180.59   23.29   3
  10   1   0  178.86   24.35   2
 -10  -1   0  174.74   17.64   1
 -11  -1   0    3.94   10.94   3
 -11  -1   0   30.60   10.20   1
  11   1   0   31.66   13.04   2
 -12  -1   0  636.88   53.75   3
 -12  -1   0  557.44   43.07   1
 -13  -1   0   62.71   18.11   3
  13   1   0   61.90   16.54   3
  14   1   0  350.42   38.56   3
  15   1   0   12.70   15.45   3
  16   1   0  107.18   23.61   3
 -14   2   0  306.26   28.21   1
 -13   2   0   10.82   10.26   1
 -12   2   0  410.69   39.60   2
 -12   2   0  424.73   34.56   1
  12  -2   0  461.10   40.45   3
 -11   2   0   40.54   13.61   2
  11  -2   0   34.98   10.47   3
 -11   2   0   25.26   10.50   1
 -10   2   0  169.52   19.07   1
 -10   2   0  162.80   22.18   2
  10  -2   0  188.11   23.03   3
  -9   2   0    3.31    9.46   2
  -9   2   0    4.11    7.47   1
  -9   2   0    9.83    8.29   3
  -8   2   0  499.80   36.32   1
  -8   2   0  496.80   41.46   2
  -8   2   0  533.94   41.04   3
  -7   2   0 2391.29  166.28   2
  -7   2   0 2538.97  149.89   1
  -7   2   0 2357.65  169.44   3
  -6   2   0  393.49   31.32   2
  -6   2   0  394.79   27.89   1
  -6   2   0  361.13   30.12   3
  -5   2   0   60.78    8.73   1
  -5   2   0   73.15   10.24   2
  -5   2   0   63.40    8.42   3
  -4   2   0  312.65   24.30   2
  -4   2   0  307.18   21.53   1
  -4   2   0  283.83   22.86   3
  -3   2   0 1384.70   94.46   2
  -3   2   0 1390.27   85.26   1
   2  -2   0  898.46   50.47   4
  -2   2   0  872.42   60.43   2
   2  -2   0  862.38   55.98   1
  -1   2   0  646.24   45.31   2
   1  -2   0  664.88   38.20   4
   1  -2   0  652.80   42.32   1
   0   2   0 9956.72  658.80   2
   0  -2   0 9999.99  597.63   1
  -1  -2   0  163.17   15.19   1
  -1  -2   0  156.22   13.13   3
  -2  -2   0  867.42   63.13   3
   2   2   0  917.62   61.51   2
  -3  -2   0 1526.46   93.59   1
  -3  -2   0 1518.27  106.32   3
   3   2   0 1504.33  102.95   2
   4   2   0 2440.66  161.71   2
  -4  -2   0 2398.43  145.91   1
  -4  -2   0 2348.73  166.76   3
  -5  -2   0  502.44   40.91   3
  -5  -2   0  543.04   35.16   1
   5   2   0  522.92   39.85   2
   6   2   0  444.60   34.93   2
  -6  -2   0  437.26   30.18   1
  -6  -2   0  412.16   35.58   3
  -7  -2   0  762.50   57.56   3
   7   2   0  733.51   55.84   2
  -7  -2   0  714.59   48.52   1
   8   2   0    7.81    8.88   2
  -8  -2   0    4.82    6.44   1
  -8  -2   0   -4.73    6.53   3
   9   2   0   17.32   10.15   2
  -9  -2   0    8.78    6.54   1
  -9  -2   0   20.92   10.41   3
  10   2   0   16.38   11.52   2
 -10  -2   0   36.97    9.60   1
 -10  -2   0   29.20   12.31   3
 -11  -2   0 1219.01   91.70   3
 -11  -2   0 1125.41   76.65   1
 -12  -2   0  387.19   39.40   3
 -13  -2   0  -10.20   11.49   3
  14   2   0  463.52   47.55   3
  15   2   0    1.09   13.56   3
  16   2   0  112.96   22.97   3
  15  -3   0   56.35   19.24   1
  15  -3   0   70.40   15.77   4
  14  -3   0  165.29   25.24   1
  14  -3   0  114.50   19.02   4
  13  -3   0   65.08   18.24   1
  13  -3   0   32.40   11.86   4
 -12   3   0  391.02   39.62   2
 -12   3   0  421.13   33.52   1
 -11   3   0    3.86   11.43   2
 -11   3   0   10.01    9.81   1
 -10   3   0  535.47   50.65   2
  10  -3   0  693.58   51.73   3
 -10   3   0  634.99   44.98   1
  -9   3   0  898.16   63.18   1
  -9   3   0  913.61   71.84   2
   9  -3   0 1038.97   72.60   3
  -8   3   0  569.91   39.71   1
  -8   3   0  499.07   44.72   2
   8  -3   0  597.17   44.63   3
  -7   3   0  268.81   26.01   2
  -7   3   0  307.92   23.22   1
   7  -3   0  274.60   24.69   3
  -6   3   0  124.11   13.15   1
  -6   3   0  128.87   15.32   2
   6  -3   0  101.05   12.65   3
   5  -3   0 3630.50  229.30   1
  -5   3   0 3731.98  251.07   2
   5  -3   0 3894.09  256.61   3
   5  -3   0 3688.84  205.74   4
  -4   3   0   -4.17    5.06   2
   4  -3   0    5.38    6.56   1
   4  -3   0    1.86    3.53   3
   4  -3   0    2.90    6.04   4
   3  -3   0 3049.77  164.88   4
  -3   3   0 2989.66  200.97   2
   3  -3   0 2954.38  183.78   1
  -2   3   0 2192.23  151.50   2
   2  -3   0 2293.91  124.76   4
   2  -3   0 2274.47  139.06   1
   1  -3   0   90.53   11.35   1
   1  -3   0  106.73   10.35   4
  -1   3   0   89.11   10.24   2
   0  -3   0   87.27    9.66   3
   0   3   0  125.28   11.56   2
   0  -3   0  113.20   12.91   1
  -1  -3   0  243.21   21.52   1
   1   3   0  243.14   19.57   2
  -1  -3   0  237.79   19.23   3
   2   3   0 3343.48  215.35   2
  -2  -3   0 3404.23  221.63   3
  -2  -3   0 2914.78  197.27   1
  -3  -3   0   17.09    6.14   3
   3   3   0   19.59    5.97   2
  -3  -3   0   21.84    8.74   1
  -4  -3   0   58.44    9.98   3
  -4  -3   0   67.48   10.45   1
   4   3   0   51.40    9.25   2
  -5  -3   0 1791.93  108.83   1
  -5  -3   0 1774.87  124.65   3
   5   3   0 1683.36  120.13   2
   6   3   0 1183.65   83.07   2
  -6  -3   0 1204.65   86.30   3
  -6  -3   0 1119.17   74.19   1
   7   3   0  481.52   38.89   2
  -7  -3   0  477.81   40.56   3
  -7  -3   0  489.01   34.11   1
  -8  -3   0   -7.59    6.82   3
   8   3   0    7.05    7.87   2
  -8  -3   0   12.13    6.26   1
  -9  -3   0 1033.15   68.28   1
   9   3   0 1054.47   77.88   2
  -9  -3   0 1050.81   80.95   3
 -10  -3   0  387.37   37.12   3
 -10  -3   0  366.27   28.80   1
  10   3   0  360.67   34.21   2
 -11  -3   0   32.93   14.94   3
 -11  -3   0    5.45    8.70   1
 -12  -3   0  254.31   31.85   3
 -13  -3   0   67.22   19.88   3
 -14  -3   0  192.15   30.40   3
  14   3   0  203.77   32.32   3
  15   3   0   15.80   15.82   3
  16   3   0  164.14   29.84   3
  16  -4   0   30.84   13.80   1
  15  -4   0  337.91   38.19   1
  15  -4   0  333.35   33.71   4
  14  -4   0  173.60   26.51   1
  14  -4   0  176.01   23.81   4
 -13   4   0   46.57   17.31   2
  13  -4   0   48.07   13.20   4
  13  -4   0   30.06   15.48   1
  12  -4   0  147.77   23.31   1
 -12   4   0  112.88   23.32   2
  12  -4   0  139.07   20.12   4
 -11   4   0   14.84   12.81   2
  11  -4   0  -10.33    9.46   1
  11  -4   0    4.91    8.88   4
  10  -4   0  862.29   57.01   4
 -10   4   0  778.99   66.71   2
  10  -4   0  892.67   63.36   1
   9  -4   0    2.94   10.90   1
   9  -4   0    8.88    9.64   4
  -9   4   0    7.81   10.53   2
   8  -4   0  719.35   55.10   1
   8  -4   0  781.54   56.89   3
   8  -4   0  759.08   50.61   4
  -8   4   0  745.94   58.56   2
  -7   4   0 1130.93   82.90   2
   7  -4   0 1140.14   82.06   3
   7  -4   0 1148.64   77.79   1
   7  -4   0 1143.83   70.49   4
   6  -4   0  344.63   29.34   1
   6  -4   0  342.03   27.09   3
  -6   4   0  331.10   29.34   2
   6  -4   0  330.30   26.67   4
   5  -4   0   99.06   14.33   4
   5  -4   0  119.19   16.45   1
  -5   4   0  136.90   15.59   2
   5  -4   0  107.32   11.54   3
   4  -4   0   62.20   12.63   1
  -4   4   0   71.06   10.92   2
   4  -4   0   62.01   11.27   4
   3  -4   0 2409.11  134.39   4
  -3   4   0 2475.55  162.81   2
   3  -4   0 2327.37  149.55   1
   2  -4   0  751.88   46.55   4
  -2   4   0  766.18   54.38   2
   2  -4   0  771.69   51.79   1
   1  -4   0   46.80    9.86   1
  -1   4   0   40.98    7.56   2
   0   4   0   79.32    9.60   2
   0  -4   0   53.83    7.40   3
   0  -4   0   87.14   12.83   1
   1   4   0   32.67    7.11   2
  -1  -4   0   27.23    5.69   3
  -1  -4   0   34.20   10.75   1
  -2  -4   0  142.55   14.37   3
  -2  -4   0  159.85   19.31   1
   2   4   0  141.38   14.69   2
  -3  -4   0   19.20    6.49   3
  -3  -4   0   17.44   11.33   1
   3   4   0   27.58    7.29   2
  -4  -4   0 2296.37  163.67   3
   4   4   0 2249.61  158.36   2
  -4  -4   0 2455.84  146.27   1
  -5  -4   0   32.46    9.67   1
   5   4   0   35.37    8.70   2
  -5  -4   0   26.97    8.87   3
  -6  -4   0  116.32   16.00   3
  -6  -4   0  108.97   14.08   1
   6   4   0  120.15   15.32   2
   7   4   0 1088.33   77.21   2
  -7  -4   0 1089.73   69.02   1
  -7  -4   0  999.32   79.71   3
  -8  -4   0  180.60   17.82   1
   8   4   0  150.28   19.49   2
  -8  -4   0  164.25   21.61   3
   9   4   0  112.84   17.57   2
  -9  -4   0  140.06   20.77   3
  -9  -4   0  131.93   15.67   1
 -10  -4   0   10.98   10.81   3
 -10  -4   0   22.82    8.74   1
 -11  -4   0 1125.33   89.08   3
 -12  -4   0  205.95   29.03   3
 -13  -4   0   44.78   17.33   3
 -14  -4   0  265.73   36.73   3
  14   4   0  273.73   37.94   3
  15   4   0   69.49   20.10   3
  16  -5   0   19.80   10.89   4
  16  -5   0   34.82   18.67   1
  15  -5   0   24.89   15.14   1
  15  -5   0    6.93    9.90   4
  14  -5   0  245.40   28.14   4
  14  -5   0  262.15   32.80   1
 -13   5   0  196.72   30.17   2
  13  -5   0  217.03   26.61   4
  13  -5   0  203.40   28.80   1
  12  -5   0  514.65   45.20   1
  12  -5   0  537.86   41.36   4
 -12   5   0  496.81   48.22   2
  11  -5   0    9.47   12.06   1
  11  -5   0    2.83    9.34   4
 -11   5   0    2.40   12.27   2
  10  -5   0  646.07   51.02   1
  10  -5   0  623.17   45.75   4
 -10   5   0  615.66   53.81   2
   9  -5   0  127.56   19.02   4
  -9   5   0  137.55   22.20   2
   9  -5   0  154.37   22.72   1
   8  -5   0  266.13   26.55   4
   8  -5   0  302.67   30.50   1
  -8   5   0  255.87   28.68   2
   7  -5   0    0.61    8.85   1
   7  -5   0    0.76    8.49   4
  -7   5   0   -3.82    8.02   2
   6  -5   0  352.70   26.97   4
  -6   5   0  272.75   27.72   2
   6  -5   0  277.57   28.51   1
  -5   5   0 4295.48  295.38   2
   5  -5   0 4440.73  270.84   1
   5  -5   0 4435.49  242.88   4
   4  -5   0   32.27   10.94   1
   4  -5   0   20.45    9.02   4
  -4   5   0   23.44    9.06   2
  -3   5   0 2350.27  160.56   2
   3  -5   0 2363.63  133.35   4
   3  -5   0 2363.33  148.47   1
   2  -5   0  851.93   59.45   1
  -2   5   0  889.49   62.37   2
  -1   5   0 1159.98   79.05   2
   1  -5   0 1220.28   75.62   1
   1  -5   0 1008.31   78.16   3
   0   5   0    8.17    5.90   2
   0  -5   0    5.26    8.41   1
   0  -5   0   -0.58    3.29   3
  -1  -5   0  216.42   20.95   3
   1   5   0  274.37   22.58   2
  -1  -5   0  288.38   26.19   1
   2   5   0 2835.49  196.84   2
  -2  -5   0 3113.39  202.28   3
  -2  -5   0 2806.03  183.07   1
  -3  -5   0  165.76   23.49   1
  -3  -5   0  191.82   18.86   3
   3   5   0  204.57   19.08   2
   4   5   0   -5.48    5.91   2
  -4  -5   0   12.87   11.77   1
  -4  -5   0    0.32    5.71   3
   5   5   0  655.22   50.83   2
  -5  -5   0  668.33   49.02   1
  -5  -5   0  714.28   53.38   3
  -6  -5   0 1412.76   90.67   1
  -6  -5   0 1452.79  102.88   3
   6   5   0 1322.53   98.42   2
  -7  -5   0  158.18   19.95   3
   7   5   0  128.11   17.80   2
  -7  -5   0  146.20   17.59   1
   8   5   0   69.88   13.79   2
  -8  -5   0   65.83   15.39   3
  -8  -5   0   91.22   13.34   1
  -9  -5   0  776.84   50.98   1
  -9  -5   0  716.72   60.43   3
   9   5   0  693.09   57.08   2
 -10  -5   0   99.76   19.94   3
 -11  -5   0   37.85   15.43   3
 -12  -5   0   20.22   13.22   3
 -13  -5   0  248.17   34.15   3
 -14  -5   0  167.80   30.46   3
  15   5   0   67.45   20.05   3
  15  -6   0  304.64   39.75   1
  15  -6   0  307.78   33.42   4
  14  -6   0  198.50   25.36   4
  14  -6   0  238.64   34.17   1
 -13   6   0   96.61   22.42   2
  13  -6   0   92.69   23.51   1
  13  -6   0   77.78   18.33   4
 -12   6   0  236.85   33.77   2
  12  -6   0  263.80   33.92   1
  12  -6   0  250.48   29.03   4
  11  -6   0  162.75   27.80   1
 -11   6   0  184.22   28.53   2
  11  -6   0  213.63   25.64   4
  10  -6   0  354.15   33.53   4
  10  -6   0  391.62   39.43   1
 -10   6   0  301.84   35.47   2
   9  -6   0   14.40   10.26   4
  -9   6   0   -3.89   11.59   2
   9  -6   0   22.43   13.96   1
  -8   6   0  327.31   32.93   2
   8  -6   0  368.41   36.11   1
   8  -6   0  305.68   30.41   4
  -7   6   0  418.70   38.41   2
   7  -6   0  468.01   34.69   4
   7  -6   0  398.07   37.76   1
  -6   6   0  179.19   21.68   2
   6  -6   0  189.90   24.26   1
   6  -6   0  185.40   21.46   4
   5  -6   0   73.38   14.36   4
   5  -6   0   65.84   15.07   1
  -5   6   0   76.83   13.56   2
   4  -6   0  153.24   19.18   4
  -4   6   0  174.26   19.00   2
   4  -6   0  201.96   22.19   1
   3  -6   0 1784.43  116.58   1
   3  -6   0 1778.56  104.58   4
  -3   6   0 1837.47  124.77   2
   2  -6   0  235.96   24.85   1
  -2   6   0  231.56   21.63   2
  -1   6   0  396.10   29.41   2
   1  -6   0  288.62   25.49   3
   1  -6   0  352.89   30.59   1
   0  -6   0   81.50   10.10   3
   0   6   0   95.01   12.91   2
   0  -6   0  111.12   17.59   1
   1   6   0  194.13   20.17   2
  -1  -6   0  269.99   27.06   1
  -1  -6   0  208.02   19.68   3
  -2  -6   0   13.28    6.44   3
   2   6   0   17.36    7.84   2
  -2  -6   0   -2.69   10.95   1
  -3  -6   0  650.28   45.74   3
  -3  -6   0  587.66   47.11   1
   3   6   0  493.42   43.54   2
  -4  -6   0 1858.95  116.64   3
   4   6   0 1456.82  111.93   2
  -4  -6   0 1516.73  107.22   1
  -5  -6   0   36.76   14.12   1
   5   6   0   46.51   11.23   2
  -5  -6   0   55.33   11.65   3
  -6  -6   0   69.72   15.90   1
   6   6   0   75.16   13.28   2
  -6  -6   0   72.90   14.01   3
  -7  -6   0  667.86   47.93   1
  -7  -6   0  655.78   53.85   3
   7   6   0  637.51   51.10   2
  -8  -6   0  329.74   32.89   3
   8   6   0  301.07   29.94   2
  -8  -6   0  345.88   28.12   1
  -9  -6   0  501.50   45.87   3
 -10  -6   0   -1.33    9.81   3
 -11  -6   0  761.04   65.46   3
 -12  -6   0  134.89   25.13   3
 -13  -6   0   15.09   14.91   3
 -14  -6   0   75.09   22.50   3
  14   6   0  152.93   29.85   3
  15  -7   0    8.28   16.51   1
  15  -7   0   56.71   14.76   4
  14  -7   0   23.87   15.26   1
  14  -7   0   40.40   14.00   4
 -14   7   0   -3.01   16.60   2
  13  -7   0  595.97   53.48   1
 -13   7   0  558.41   55.77   2
  13  -7   0  614.21   46.99   4
  12  -7   0  406.22   36.62   4
  12  -7   0  445.54   46.71   1
 -12   7   0  401.41   42.97   2
 -11   7   0    3.92   14.28   2
  11  -7   0   38.00   16.85   1
  11  -7   0   46.13   13.12   4
 -10   7   0  546.19   49.46   2
  10  -7   0  533.76   47.76   1
  10  -7   0  523.61   42.30   4
  -9   7   0   55.28   17.76   2
   9  -7   0   81.12   21.64   1
   9  -7   0   50.67   15.40   4
  -8   7   0  606.37   52.88   2
   8  -7   0  628.36   51.71   1
   8  -7   0  635.88   46.50   4
   7  -7   0    8.95   10.18   4
   7  -7   0   -1.22   10.26   1
  -7   7   0    5.26   11.51   2
   6  -7   0  604.08   44.39   4
  -6   7   0  598.06   49.03   2
   6  -7   0  598.10   48.63   1
   5  -7   0 1075.22   68.86   4
   5  -7   0 1114.54   76.57   1
  -5   7   0 1042.91   78.85   2
   4  -7   0    5.24    9.27   1
  -4   7   0   -0.87    7.82   2
   4  -7   0   -5.54    7.26   4
   3  -7   0  162.10   22.25   1
  -3   7   0  171.64   19.50   2
   2  -7   0   59.88   14.48   1
  -2   7   0   44.91   10.80   2
   1  -7   0 2355.12  149.14   1
  -1   7   0 2501.87  159.36   2
   1  -7   0 2106.53  159.53   3
   0  -7   0   23.95   11.50   1
   0   7   0    8.82    7.52   2
   0  -7   0    8.14    4.68   3
  -1  -7   0  733.03   56.28   3
  -1  -7   0  774.75   57.70   1
   1   7   0  800.89   57.22   2
  -2  -7   0 1849.08  127.35   3
  -2  -7   0 1800.14  120.16   1
   2   7   0 1755.14  124.93   2
  -3  -7   0   27.92    8.33   3
   3   7   0   30.38    9.48   2
  -3  -7   0   23.64   15.96   1
   4   7   0   25.93    9.67   2
  -4  -7   0   30.66    9.80   3
  -4  -7   0   44.75   18.16   1
  -5  -7   0  111.58   16.48   3
   5   7   0  113.31   16.48   2
  -5  -7   0  113.43   22.14   1
  -6  -7   0  682.00   55.92   1
   6   7   0  771.40   58.04   2
  -6  -7   0  770.86   59.78   3
  -7  -7   0  253.62   27.54   3
  -7  -7   0  256.27   28.28   1
   7   7   0  231.96   25.46   2
   8   7   0   44.40   12.39   2
  -8  -7   0   44.38   14.31   3
  -9  -7   0  956.47   77.00   3
 -10  -7   0   93.47   19.44   3
 -11  -7   0   16.87   11.83   3
 -12  -7   0   26.00   13.59   3
 -13  -7   0  277.70   37.61   3
 -14   8   0  117.62   26.26   2
  14  -8   0   75.97   24.10   1
  14  -8   0  131.39   22.43   4
  13  -8   0   82.63   19.37   4
  13  -8   0   79.58   23.87   1
 -13   8   0   49.64   19.40   2
  12  -8   0   97.75   24.08   1
  12  -8   0   88.53   19.33   4
 -12   8   0  125.44   25.62   2
 -11   8   0  151.60   26.41   2
  11  -8   0   96.63   24.82   1
  11  -8   0  179.01   25.84   4
  10  -8   0  409.68   42.03   1
 -10   8   0  432.71   43.51   2
  10  -8   0  441.62   38.11   4
   9  -8   0   15.74   14.56   1
  -9   8   0   -9.68   13.42   2
   9  -8   0   13.71   11.93   4
   8  -8   0 1130.79   73.69   4
  -8   8   0 1040.02   83.39   2
   8  -8   0 1089.74   80.68   1
   7  -8   0  303.03   35.13   1
   7  -8   0  268.02   30.45   4
  -7   8   0  319.20   32.19   2
  -6   8   0   23.26   12.32   2
   6  -8   0   33.16   14.65   1
   6  -8   0   21.18   12.53   4
   5  -8   0   55.65   17.67   1
  -5   8   0   52.61   13.84   2
   5  -8   0   70.38   16.68   4
  -4   8   0   22.51    9.24   2
   4  -8   0   20.21   12.72   1
   3  -8   0 1241.87   85.41   1
  -3   8   0 1190.47   87.76   2
   2  -8   0  160.99   23.49   1
  -2   8   0  145.80   18.53   2
  -1   8   0  490.96   38.98   2
   1  -8   0  467.77   40.71   1
   0   8   0  533.82   41.58   2
   0  -8   0  553.19   44.13   1
   0  -8   0  475.25   38.89   3
  -1  -8   0 1070.94   77.01   1
  -1  -8   0 1027.52   76.43   3
   1   8   0 1080.95   76.88   2
  -2  -8   0   -1.16    5.84   3
  -2  -8   0    9.28   14.52   1
   2   8   0    1.00    7.50   2
   3   8   0   52.94   12.08   2
  -3  -8   0   50.52   10.52   3
  -3  -8   0   31.89   17.28   1
   4   8   0  613.69   48.35   2
  -4  -8   0  654.04   49.33   3
  -4  -8   0  555.13   51.28   1
  -5  -8   0   71.45   14.19   3
   5   8   0   85.79   14.82   2
  -5  -8   0   53.74   20.41   1
  -6  -8   0  105.17   22.34   1
  -6  -8   0   98.38   17.08   3
   6   8   0   99.42   16.66   2
  -7  -8   0  188.54   26.15   1
  -7  -8   0  194.01   24.23   3
   7   8   0  156.72   21.64   2
  -8  -8   0  408.14   39.38   3
  -9  -8   0   60.36   16.08   3
 -10  -8   0    3.42    9.98   3
 -11  -8   0  340.48   36.56   3
 -12  -8   0  102.90   22.14   3
 -13  -8   0   32.37   15.16   3
 -14   9   0    2.37   15.73   2
  13  -9   0  440.03   42.50   1
  13  -9   0  358.08   39.92   4
 -13   9   0  337.99   45.22   2
  12  -9   0   94.97   21.54   1
  12  -9   0   70.82   15.45   4
 -12   9   0   71.31   21.85   2
  11  -9   0   68.31   17.07   4
 -11   9   0   40.80   18.63   2
  11  -9   0   48.48   18.69   1
 -10   9   0  365.30   41.16   2
  10  -9   0  441.46   37.96   4
  10  -9   0  395.52   44.34   1
   9  -9   0  137.02   25.67   1
   9  -9   0  149.65   24.75   4
  -9   9   0  140.50   25.03   2
  -8   9   0  811.99   66.06   2
   8  -9   0  795.76   64.72   1
   8  -9   0  809.17   58.99   4
   7  -9   0   29.87   14.42   4
   7  -9   0   23.41   14.15   1
  -7   9   0   32.83   14.26   2
  -6   9   0  493.24   44.68   2
   6  -9   0  548.07   47.19   1
  -5   9   0  220.28   26.66   2
   5  -9   0  259.10   31.56   1
  -4   9   0   45.17   13.31   2
   4  -9   0   59.77   17.46   1
   3  -9   0   27.29   14.39   1
  -3   9   0   42.92   12.48   2
   2  -9   0   93.80   20.45   1
  -2   9   0  105.54   16.24   2
   1  -9   0  746.18   59.81   1
  -1   9   0  816.04   59.90   2
   0   9   0    6.45    8.92   2
   0  -9   0    5.23   11.56   1
  -1  -9   0  229.21   30.44   1
  -1  -9   0  186.23   19.41   3
   1   9   0  210.05   22.40   2
   2   9   0  521.84   44.95   2
  -2  -9   0  603.73   51.65   1
  -2  -9   0  578.95   44.78   3
  -3  -9   0  485.29   46.67   1
  -3  -9   0  492.10   39.96   3
   3   9   0  461.96   39.83   2
  -4  -9   0   26.99   18.79   1
  -4  -9   0    6.40    7.92   3
   4   9   0    4.79    9.17   2
  -5  -9   0   27.15   10.87   3
  -5  -9   0   25.81   19.51   1
   5   9   0   16.84   10.04   2
   6   9   0 1246.81   93.48   2
  -6  -9   0 1297.97   96.55   3
  -7  -9   0  125.38   20.15   3
   7   9   0  113.42   18.47   2
  -8  -9   0   47.58   14.14   3
  -9  -9   0  282.78   31.60   3
 -10  -9   0  131.46   23.22   3
 -11  -9   0   34.84   14.81   3
 -12  -9   0   13.45   14.09   3
 -13  10   0   63.67   20.47   2
 -12  10   0   56.18   21.29   2
  12 -10   0   98.95   22.63   4
  12 -10   0   58.25   21.49   1
 -11  10   0  154.87   28.44   2
  11 -10   0  186.56   31.48   1
  11 -10   0  181.69   28.80   4
  10 -10   0  269.38   36.10   1
 -10  10   0  243.49   33.80   2
  10 -10   0  209.27   29.20   4
   9 -10   0   25.54   15.17   1
   9 -10   0   36.86   14.77   4
  -9  10   0   28.18   15.91   2
   8 -10   0  444.37   44.06   1
  -8  10   0  415.15   41.50   2
  -7  10   0   17.78   13.52   2
   7 -10   0   48.61   17.98   1
   6 -10   0  402.66   41.57   1
  -6  10   0  440.81   39.92   2
  -5  10   0   95.51   17.70   2
   5 -10   0   69.74   21.03   1
   4 -10   0  309.89   36.16   1
  -4  10   0  295.55   29.89   2
  -3  10   0  904.12   66.13   2
   3 -10   0  795.70   65.89   1
  -2  10   0    4.26    9.23   2
   2 -10   0   12.44   12.73   1
  -1  10   0   55.14   13.31   2
   1 -10   0   45.83   17.44   1
   0 -10   0  215.10   31.54   1
   0  10   0  250.36   25.34   2
  -1 -10   0  846.03   67.20   1
   1  10   0  844.95   64.37   2
  -2 -10   0   17.39   16.01   1
   2  10   0   38.33   10.91   2
  -3 -10   0   63.36   22.59   1
  -3 -10   0   73.68   12.97   3
   3  10   0   50.80   13.20   2
  -4 -10   0  762.11   58.43   3
  -4 -10   0  675.04   62.57   1
   4  10   0  761.59   58.10   2
  -5 -10   0   -8.60    7.57   3
   5  10   0    3.73    9.09   2
  -5 -10   0   40.15   20.87   1
   6  10   0   18.32   10.74   2
  -6 -10   0    0.70    8.00   3
  -7 -10   0    5.15    9.17   3
  -8 -10   0  255.50   29.47   3
  -9 -10   0   37.36   13.46   3
 -10 -10   0    7.33   10.61   3
 -11 -10   0  442.19   45.24   3
 -12  11   0  117.82   27.44   2
 -11  11   0   17.84   17.56   2
  11 -11   0  -13.69   13.65   1
 -10  11   0   53.11   19.16   2
  10 -11   0   59.70   18.75   1
  -9  11   0  187.31   28.57   2
   9 -11   0  167.64   31.71   1
  -8  11   0  340.91   36.45   2
   8 -11   0  326.65   41.92   1
   7 -11   0   35.01   17.74   1
  -7  11   0   31.12   14.38   2
   6 -11   0  471.17   45.17   1
  -6  11   0  420.79   41.15   2
   5 -11   0   46.81   18.44   1
  -5  11   0   66.00   15.94   2
  -4  11   0   70.03   16.53   2
   4 -11   0   99.66   23.00   1
   3 -11   0   12.21   14.49   1
  -3  11   0   -7.55    8.82   2
   2 -11   0   69.47   18.58   1
  -2  11   0   84.77   16.13   2
  -1  11   0  659.72   54.56   2
   1 -11   0  711.96   58.02   1
   0  11   0    5.69    9.31   2
   0 -11   0    4.96   13.39   1
  -1 -11   0  164.71   27.79   1
   1  11   0  204.33   22.27   2
  -2 -11   0  159.52   28.37   1
   2  11   0  129.46   19.25   2
  -3 -11   0  219.48   32.42   1
   3  11   0  187.92   23.68   2
   4  11   0   -0.67    9.40   2
  -4 -11   0   -0.58    7.03   3
  -4 -11   0    6.97   20.13   1
   5  11   0   27.80   12.41   2
  -5 -11   0   29.80   11.08   3
   6  11   0  576.60   52.47   2
  -6 -11   0  721.14   55.96   3
  -7 -11   0   -5.34    9.26   3
  -8 -11   0  -11.31    9.89   3
  -9 -11   0  104.33   19.53   3
 -10 -11   0   91.63   20.70   3
 -11 -11   0  118.71   23.17   3
 -10  12   0  125.72   24.65   2
  10 -12   0  121.54   27.47   1
  -9  12   0   38.97   18.30   2
   9 -12   0   32.27   19.50   1
   8 -12   0  135.18   29.18   1
  -8  12   0  124.17   23.70   2
   7 -12   0   -9.56   13.07   1
  -7  12   0    5.50   12.92   2
   6 -12   0  283.76   39.91   1
  -6  12   0  307.58   32.84   2
   5 -12   0   17.95   15.41   1
  -5  12   0   33.68   13.80   2
  -4  12   0  324.71   33.25   2
   4 -12   0  346.12   41.12   1
   3 -12   0  426.58   43.03   1
  -3  12   0  414.79   38.68   2
   2 -12   0   78.72   21.91   1
  -2  12   0   78.79   15.96   2
   1 -12   0   31.80   16.22   1
  -1  12   0   11.73   10.99   2
   0  12   0    4.75    9.96   2
   0 -12   0   -2.98   14.65   1
  -1 -12   0  235.83   34.55   1
   1  12   0  260.67   27.07   2
  -2 -12   0   46.34   20.67   1
   2  12   0   49.76   12.44   2
  -3 -12   0  196.56   34.54   1
   3  12   0  221.95   24.51   2
   5  12   0  153.29   21.69   2
  -7 -12   0    4.57   10.51   3
  -8 -12   0  333.05   35.09   3
  -9 -12   0   55.69   15.69   3
 -10 -12   0   31.00   13.53   3
   9 -13   0   77.48   22.66   1
  -9  13   0   81.84   20.98   2
   8 -13   0  148.62   31.14   1
  -8  13   0  173.25   28.56   2
  -7  13   0   15.78   14.37   2
   7 -13   0   -8.85   15.99   1
   6 -13   0  442.41   49.72   1
  -6  13   0  377.67   39.09   2
  -5  13   0    9.79   11.97   2
   5 -13   0   16.64   18.62   1
  -4  13   0  251.84   28.04   2
   4 -13   0  257.33   36.56   1
   3 -13   0   42.93   17.79   1
  -3  13   0   46.75   14.26   2
   2 -13   0  154.52   28.28   1
  -2  13   0  226.65   26.60   2
   1 -13   0  377.38   44.34   1
  -1  13   0  342.70   34.04   2
   0  13   0    1.39    9.54   2
   0 -13   0    7.56   16.97   1
  -1 -13   0   51.74   20.56   1
   1  13   0   28.04   12.69   2
  -2 -13   0   57.27   21.93   1
   2  13   0   68.94   15.66   2
   3  13   0  365.85   35.11   2
   4  13   0   15.55   12.03   2
   9  13   0   50.81   22.30   3
   7 -14   0   12.94   16.87   1
  -7  14   0   31.34   14.82   2
   6 -14   0  195.30   34.79   1
  -6  14   0  182.19   27.72   2
  -5  14   0   15.82   12.04   2
   5 -14   0   12.06   16.59   1
  -4  14   0  234.27   29.04   2
   4 -14   0  190.33   33.46   1
  -3  14   0   91.90   17.97   2
   3 -14   0   48.67   19.41   1
  -2  14   0   72.18   15.69   2
   2 -14   0   47.22   19.85   1
  -1  14   0   59.77   14.56   2
   1 -14   0   41.83   17.46   1
   0  14   0   21.51   12.28   2
   0 -14   0   57.56   22.42   1
  -1 -14   0  218.69   37.01   1
   1  14   0  347.27   31.52   2
   2  14   0   24.63   12.15   2
   3  14   0  150.37   22.19   2
   4  14   0  143.15   21.17   2
   5 -15   0   -6.79   16.07   1
   4 -15   0  130.02   27.52   1
  -4  15   0  132.44   21.49   2
  -3  15   0   41.65   13.68   2
   3 -15   0   25.45   19.21   1
  -2  15   0  156.76   23.28   2
   2 -15   0  136.35   29.29   1
   1 -15   0  144.66   27.18   1
  -1  15   0  133.31   20.95   2
   0 -15   0   42.33   22.01   1
   0  15   0   58.14   15.10   2
   1  15   0   42.48   13.81   2
   2  15   0   -6.95   11.73   2
   3  15   0  186.89   24.34   2
   1 -16   0   49.44   19.67   1
   2  15  -1  170.65   22.62   2
   1  15  -1   86.92   16.20   2
   0  15  -1   17.61   12.84   2
   0 -15   1   15.92   21.90   1
   1 -15   1  228.67   36.23   1
  -1  15  -1  244.56   29.61   2
   2 -15   1   26.92   19.22   1
  -2  15  -1   16.19   13.02   2
  -3  15  -1   45.85   14.13   2
   3 -15   1   26.25   18.76   1
   4 -15   1  -10.46   17.18   1
   3  14  -1    1.30   11.26   2
  -2 -14   1  151.39   28.86   1
   2  14  -1  113.48   19.68   2
   1  14  -1   89.44   17.04   2
  -1 -14   1   79.99   26.50   1
   0  14  -1  308.18   30.70   2
   0 -14   1  268.41   40.25   1
  -1  14  -1   21.77   11.98   2
   1 -14   1   23.41   17.61   1
   2 -14   1  -10.72   16.12   1
  -2  14  -1   13.16   11.17   2
   3 -14   1  349.32   45.65   1
  -3  14  -1  445.41   39.32   2
   4 -14   1   21.12   17.63   1
  -4  14  -1   48.28   14.50   2
   5 -14   1    1.61   18.68   1
  -5  14  -1   15.51   13.34   2
   6 -14   1   28.16   18.42   1
  -6  14  -1   99.51   19.33   2
  -3 -13   1   27.82   23.13   1
   3  13  -1   16.39   11.25   2
  -2 -13   1  260.49   38.51   1
   2  13  -1  328.12   31.13   2
   1  13  -1   92.28   16.70   2
  -1 -13   1   45.10   21.89   1
   0  13  -1    2.75   10.88   2
   0 -13   1   56.78   17.52   1
   1 -13   1  138.16   29.05   1
  -1  13  -1  178.40   23.33   2
  -2  13  -1   52.75   14.32   2
   2 -13   1   68.01   21.83   1
   3 -13   1   31.87   16.88   1
  -3  13  -1   52.76   14.02   2
  -4  13  -1    5.06   10.71   2
   4 -13   1   20.22   16.20   1
  -5  13  -1  619.61   51.60   2
   5 -13   1  560.04   55.06   1
  -6  13  -1   20.91   12.26   2
   6 -13   1    7.99   17.16   1
  -7  13  -1   14.73   13.58   2
   7 -13   1   37.99   20.31   1
   8 -13   1   55.08   20.91   1
  -8  13  -1   69.46   19.68   2
   9  12  -1  303.98   43.54   3
   8  12  -1   38.43   20.51   3
   7  12  -1  273.49   37.41   3
  -4 -12   1  449.38   55.77   1
   4  12  -1  631.64   47.48   2
  -3 -12   1   -6.11   19.56   1
   3  12  -1   20.68   10.69   2
  -2 -12   1   30.94   19.72   1
   2  12  -1   45.86   13.51   2
   1  12  -1   31.18   11.73   2
  -1 -12   1   39.25   21.78   1
   0 -12   1  300.50   39.03   1
   0  12  -1  248.75   27.55   2
  -1  12  -1    0.03    9.88   2
   1 -12   1  -10.57   13.25   1
  -2  12  -1   28.36   11.80   2
   2 -12   1   -2.15   14.35   1
  -3  12  -1  776.25   60.76   2
   3 -12   1  723.82   63.15   1
  -4  12  -1    6.45   11.03   2
   4 -12   1    6.20   13.89   1
  -5  12  -1   47.42   14.34   2
   5 -12   1   70.23   22.11   1
   6 -12   1   88.08   23.02   1
  -6  12  -1   54.49   14.77   2
  -7  12  -1  217.81   29.70   2
   7 -12   1  244.09   37.42   1
   8 -12   1  167.65   30.69   1
  -8  12  -1  103.39   23.10   2
   9 -12   1   36.88   20.60   1
  -9  12  -1   36.15   17.80   2
 -10  12  -1  416.82   45.09   2
  10 -12   1  422.48   50.04   1
  10  11  -1  137.17   31.90   3
   9  11  -1  262.12   39.35   3
  -9 -11   1  225.85   31.17   3
  -8 -11   1   -0.60   10.97   3
  -7 -11   1  148.03   22.90   3
  -6 -11   1  111.12   18.95   3
   5  11  -1  140.25   19.93   2
  -5 -11   1  154.14   20.78   3
  -5 -11   1  138.82   31.83   1
   4  11  -1   -3.80    9.40   2
  -4 -11   1   12.32   21.78   1
  -3 -11   1   30.60   21.22   1
   3  11  -1   26.26   11.34   2
  -2 -11   1  616.14   57.52   1
   2  11  -1  658.47   51.42   2
  -1 -11   1   16.45   15.96   1
   1  11  -1    7.81    9.91   2
   0 -11   1   35.57   18.97   1
   0  11  -1   48.59   12.61   2
   1 -11   1  126.28   26.29   1
  -1  11  -1  163.29   21.11   2
  -2  11  -1  171.08   23.01   2
   2 -11   1  174.25   29.58   1
   3 -11   1   -1.40   13.14   1
  -3  11  -1   24.73   12.13   2
  -4  11  -1   -0.26   10.82   2
   4 -11   1   26.66   15.67   1
   5 -11   1  569.93   53.46   1
  -5  11  -1  629.71   50.92   2
   6 -11   1    1.09   14.11   1
  -6  11  -1   11.90   11.31   2
   7 -11   1   31.59   17.22   1
  -7  11  -1   45.39   15.89   2
  -8  11  -1  247.30   31.98   2
   8 -11   1  241.05   36.91   1
   9 -11   1  217.03   34.21   1
  -9  11  -1  270.58   34.47   2
  10 -11   1  124.81   26.59   1
 -10  11  -1  140.72   28.10   2
 -11  11  -1    5.36   16.73   2
  11 -11   1   16.97   15.64   1
  11  10  -1  346.93   47.84   3
 -10 -10   1   42.04   13.55   3
  -9 -10   1  120.46   22.63   3
  -8 -10   1   -2.62    9.68   3
  -7 -10   1  244.39   27.83   3
  -6 -10   1   24.78   11.39   3
  -5 -10   1  163.40   20.81   3
  -5 -10   1  124.42   29.56   1
   5  10  -1  170.44   20.83   2
  -4 -10   1  914.35   64.94   3
   4  10  -1  841.98   63.29   2
  -4 -10   1  714.66   68.54   1
  -3 -10   1  140.98   17.46   3
   3  10  -1  154.57   19.56   2
  -3 -10   1  119.59   25.70   1
  -2 -10   1   17.47   19.27   1
   2  10  -1   20.50   10.06   2
   1  10  -1   36.42   11.47   2
  -1 -10   1   25.87   15.59   1
   0  10  -1  288.20   26.79   2
   0 -10   1  229.67   33.51   1
   1 -10   1  155.23   27.30   1
  -1  10  -1  160.76   20.26   2
   2 -10   1  356.89   38.98   1
  -2  10  -1  339.73   32.41   2
  -3  10  -1  372.05   33.86   2
   3 -10   1  340.95   39.45   1
   4 -10   1   60.01   18.43   1
  -4  10  -1   65.76   15.25   2
  -5  10  -1   27.40   12.83   2
   5 -10   1   50.13   18.66   1
  -6  10  -1   69.53   17.14   2
   6 -10   1   94.17   23.71   1
   7 -10   1  842.00   68.08   1
  -7  10  -1  811.13   66.57   2
  -8  10  -1  181.66   27.85   2
   8 -10   1  209.55   31.99   1
  -9  10  -1    3.73   14.07   2
   9 -10   1   17.20   13.68   1
  10 -10   1  291.51   38.29   1
 -10  10  -1  208.74   33.08   2
  11 -10   1   39.50   15.30   4
 -11  10  -1   13.05   16.84   2
  11 -10   1   19.86   15.35   1
  12 -10   1   67.81   22.08   1
  12 -10   1   69.31   17.89   4
 -12  10  -1   85.46   23.22   2
  12   9  -1   60.02   23.36   3
  11   9  -1   30.82   19.45   3
 -11  -9   1   53.02   16.77   3
 -10  -9   1  160.73   25.36   3
  -9  -9   1  304.51   33.34   3
  -8  -9   1    0.41   10.04   3
  -7  -9   1  325.03   33.43   3
   6   9  -1   26.75   10.88   2
  -6  -9   1   15.51   10.45   3
  -6  -9   1   37.19   19.05   1
  -5  -9   1  385.74   47.71   1
  -5  -9   1  560.07   42.69   3
   5   9  -1  473.96   40.12   2
  -4  -9   1   85.81   14.48   3
  -4  -9   1  101.45   25.27   1
   4   9  -1   67.28   13.41   2
  -3  -9   1  278.48   25.94   3
  -3  -9   1  272.10   37.66   1
   3   9  -1  260.08   26.05   2
  -2  -9   1  918.17   74.96   1
  -2  -9   1  953.00   71.68   3
   2   9  -1 1038.58   72.10   2
  -1  -9   1    1.41   14.23   1
  -1  -9   1   10.61    6.57   3
   1   9  -1   12.83    9.63   2
   0   9  -1  151.85   19.01   2
   0  -9   1  117.43   24.24   1
   1  -9   1  350.31   38.42   1
  -1   9  -1  390.84   33.16   2
   2  -9   1  871.62   69.49   1
  -2   9  -1  982.57   69.81   2
   3  -9   1   58.30   17.28   1
  -3   9  -1   56.77   13.86   2
  -4   9  -1   13.41   10.05   2
   4  -9   1    4.22   14.31   1
   5  -9   1  591.11   51.12   1
  -5   9  -1  591.03   48.88   2
  -6   9  -1    7.37   11.27   2
   6  -9   1   12.78   14.61   1
   7  -9   1   40.66   15.33   1
  -7   9  -1   28.00   13.82   2
   8  -9   1  279.53   32.22   4
  -8   9  -1  279.31   32.41   2
   8  -9   1  251.02   35.01   1
   9  -9   1  574.63   50.40   1
   9  -9   1  543.39   45.23   4
  -9   9  -1  518.71   50.10   2
 -10   9  -1  133.90   26.39   2
  10  -9   1  180.75   29.66   1
  10  -9   1  205.93   28.21   4
  11  -9   1    6.27   13.23   1
 -11   9  -1   26.46   16.29   2
  11  -9   1   51.87   15.82   4
 -12   9  -1  298.19   39.80   2
  12  -9   1  324.24   36.21   4
  12  -9   1  319.18   40.56   1
  13  -9   1    1.36   13.37   1
  13  -9   1   -4.79   12.01   4
 -13   9  -1   30.52   17.71   2
 -12  -8   1  220.50   32.90   3
  12   8  -1  233.23   38.23   3
 -11  -8   1  218.19   31.19   3
 -10  -8   1  156.89   25.07   3
  -9  -8   1   85.61   19.34   3
  -8  -8   1   78.20   17.20   3
  -7  -8   1  413.37   39.87   3
  -7  -8   1  458.45   41.49   1
  -6  -8   1  101.90   17.37   3
  -6  -8   1  105.36   25.32   1
   6   8  -1  123.19   17.24   2
  -5  -8   1  246.99   24.71   3
  -5  -8   1  228.93   33.72   1
   5   8  -1  193.31   22.60   2
  -4  -8   1  130.71   17.11   3
   4   8  -1  117.10   17.02   2
  -4  -8   1  132.40   27.34   1
  -3  -8   1  398.78   31.46   3
  -3  -8   1  327.17   40.24   1
   3   8  -1  330.47   30.43   2
  -2  -8   1   12.42   14.92   1
   2   8  -1   12.40    8.12   2
  -2  -8   1    9.94    6.32   3
  -1  -8   1  220.02   20.48   3
   1   8  -1  213.22   22.19   2
  -1  -8   1  250.03   31.19   1
   0  -8   1 1994.51  138.33   3
   0  -8   1 1880.97  131.79   1
   0   8  -1 2089.33  137.96   2
  -1   8  -1   16.98    9.06   2
   1  -8   1   12.45   13.16   1
   2  -8   1  538.94   45.02   1
  -2   8  -1  522.18   42.30   2
   3  -8   1   69.85   18.01   1
  -3   8  -1   94.07   14.95   2
  -4   8  -1  123.30   18.45   2
   4  -8   1  150.12   23.95   1
  -5   8  -1   41.28   12.56   2
   5  -8   1   58.44   17.19   1
   6  -8   1  197.89   28.05   1
  -6   8  -1  173.39   23.49   2
  -7   8  -1 1755.70  123.90   2
   7  -8   1 1670.69  117.19   1
   7  -8   1 1703.43  105.81   4
  -8   8  -1  113.60   21.11   2
   8  -8   1   91.89   19.08   4
   8  -8   1   87.26   21.01   1
  -9   8  -1   47.20   17.67   2
   9  -8   1   61.95   18.11   1
   9  -8   1   87.46   19.22   4
  10  -8   1  247.18   31.30   4
  10  -8   1  340.32   38.44   1
 -10   8  -1  228.23   33.01   2
  11  -8   1  247.61   35.08   1
 -11   8  -1  239.45   33.21   2
  11  -8   1  234.06   30.65   4
  12  -8   1  306.44   35.00   4
  12  -8   1  341.34   40.57   1
 -12   8  -1  217.34   35.65   2
 -13   8  -1   65.66   22.52   2
  13  -8   1   28.32   15.86   1
  13  -8   1   79.74   17.37   4
  14  -8   1  422.41   42.53   4
 -14   8  -1  398.63   49.99   2
  14  -8   1  428.39   47.87   1
  13   7  -1   53.41   20.09   3
 -12  -7   1   98.57   21.59   3
 -11  -7   1   99.69   21.40   3
 -10  -7   1  524.68   49.12   3
  -9  -7   1  673.53   57.93   3
  -8  -7   1    6.96    9.72   3
  -8  -7   1   19.60   12.97   1
  -7  -7   1  445.23   37.66   3
  -7  -7   1  375.75   35.68   1
   7   7  -1  323.13   32.87   2
  -6  -7   1   21.10   16.44   1
  -6  -7   1   11.37    8.81   3
   6   7  -1   16.53    8.73   2
  -5  -7   1  188.15   28.79   1
   5   7  -1  165.41   19.87   2
  -5  -7   1  185.36   20.92   3
  -4  -7   1   -6.60    5.67   3
   4   7  -1   -4.39    6.88   2
  -4  -7   1    8.42   15.83   1
  -3  -7   1  259.76   23.10   3
   3   7  -1  219.22   22.15   2
  -3  -7   1  230.40   31.41   1
  -2  -7   1 1592.30  106.92   3
  -2  -7   1 1526.44  104.03   1
   2   7  -1 1374.91  104.21   2
   1   7  -1   45.84   10.12   2
  -1  -7   1   47.70   16.59   1
  -1  -7   1   40.11    7.85   3
   0   7  -1  149.88   16.90   2
   0  -7   1  147.64   14.29   3
   0  -7   1  168.25   23.57   1
  -1   7  -1   87.29   13.49   2
  -1   7  -1   70.20    9.29   3
   1  -7   1  108.50   19.18   1
   2  -7   1 1984.52  136.02   1
  -2   7  -1 2205.94  144.63   2
   3  -7   1   43.30   13.52   1
  -3   7  -1   54.36   11.83   2
   4  -7   1    5.23    9.48   1
  -4   7  -1   -0.07    8.26   2
  -5   7  -1  867.56   64.72   2
   5  -7   1  836.63   57.38   4
   5  -7   1  849.29   63.53   1
  -6   7  -1   34.96   12.72   2
   6  -7   1   54.05   14.95   4
   6  -7   1   52.08   14.97   1
   7  -7   1    4.91    9.93   4
  -7   7  -1  -14.42    9.99   2
   7  -7   1  -22.30    7.95   1
   8  -7   1    8.04   11.67   1
  -8   7  -1    3.21   12.44   2
   8  -7   1    9.47   10.50   4
   9  -7   1  616.41   48.29   4
   9  -7   1  615.08   53.18   1
  -9   7  -1  664.52   55.23   2
  10  -7   1   40.10   14.26   4
 -10   7  -1   24.50   15.69   2
  10  -7   1   18.59   14.86   1
  11  -7   1   -4.89   10.94   1
  11  -7   1   -1.01    9.65   4
 -11   7  -1    1.75   13.79   2
  12  -7   1  576.44   53.54   1
 -12   7  -1  596.75   56.91   2
  12  -7   1  666.15   49.60   4
 -13   7  -1   35.33   17.48   2
  13  -7   1   22.80   13.38   4
  13  -7   1   22.53   14.76   1
 -14   7  -1   61.86   21.50   2
  14  -7   1  115.10   19.26   4
  14  -7   1   83.14   20.68   1
  15  -7   1   41.01   13.49   4
  15  -7   1   37.28   17.71   1
  14   6  -1  143.73   27.74   3
  13   6  -1   16.39   15.00   3
 -12  -6   1  351.20   39.37   3
 -11  -6   1   62.65   17.22   3
 -10  -6   1   77.10   17.91   3
  -9  -6   1   30.77   11.52   1
  -9  -6   1   15.09   11.66   3
  -8  -6   1  427.04   39.84   3
  -8  -6   1  418.44   35.05   1
   7   6  -1  931.31   74.13   2
  -7  -6   1  998.62   70.92   1
  -7  -6   1 1118.68   79.49   3
  -6  -6   1   -4.76   11.96   1
  -6  -6   1    4.16    8.41   3
   6   6  -1   13.57    8.46   2
  -5  -6   1  483.82   36.32   3
   5   6  -1  378.12   33.00   2
  -5  -6   1  340.95   36.34   1
  -4  -6   1  126.64   15.49   3
   4   6  -1  111.13   14.81   2
  -4  -6   1   96.66   20.98   1
  -3  -6   1  610.53   52.55   1
  -3  -6   1  723.63   50.64   3
   3   6  -1  631.52   48.91   2
  -2  -6   1   44.87   16.99   1
  -2  -6   1   42.70    8.32   3
   2   6  -1   40.40    9.04   2
   1   6  -1  564.59   44.11   2
  -1  -6   1  613.15   47.83   1
  -1  -6   1  598.76   44.06   3
   0  -6   1 2349.13  154.11   1
   0  -6   1 2381.12  166.33   3
   0   6  -1 2505.92  164.05   2
   1  -6   1  126.98   19.25   1
  -1   6  -1  103.31   13.85   2
   2  -6   1  112.13   17.96   1
  -2   6  -1   98.29   13.68   2
  -3   6  -1 1009.66   72.59   2
   3  -6   1 1007.63   70.53   1
  -4   6  -1  956.84   71.47   2
   4  -6   1 1005.97   69.79   1
   4  -6   1  998.07   62.69   4
   5  -6   1  148.11   21.38   1
   5  -6   1  153.97   19.44   4
  -5   6  -1  167.01   19.61   2
  -6   6  -1  403.23   34.54   2
   6  -6   1  381.33   32.04   4
   6  -6   1  372.33   34.76   1
   7  -6   1 1052.18   73.85   1
   7  -6   1 1049.04   66.98   4
  -7   6  -1  946.12   76.27   2
  -8   6  -1   -5.78   11.01   2
   8  -6   1   -1.57    7.43   4
   8  -6   1    8.53   11.25   1
   9  -6   1  110.75   21.81   1
   9  -6   1  107.21   18.86   4
  -9   6  -1   75.55   19.16   2
  10  -6   1  376.33   37.80   1
 -10   6  -1  334.97   37.48   2
  10  -6   1  373.35   33.01   4
  11  -6   1  477.49   38.73   4
 -11   6  -1  458.06   45.66   2
  11  -6   1  469.67   43.86   1
  12  -6   1  470.25   45.30   1
 -12   6  -1  492.14   49.19   2
  12  -6   1  515.70   40.47   4
 -13   6  -1   22.04   16.22   2
  13  -6   1   38.87   17.92   1
  13  -6   1    1.82    9.72   4
  14  -6   1  390.87   42.91   1
 -14   6  -1  283.55   41.19   2
  14  -6   1  343.87   35.48   4
  15  -6   1    6.63   11.64   4
  15  -6   1   17.11   16.70   1
  14   5  -1  196.11   32.80   3
  13   5  -1  195.30   32.46   3
 -12  -5   1   73.13   19.80   3
 -11  -5   1    3.66   11.23   3
 -10  -5   1  799.30   67.92   3
 -10  -5   1  840.11   57.81   1
  -9  -5   1  583.15   42.99   1
  -9  -5   1  570.91   50.47   3
  -8  -5   1  268.15   24.82   1
   8   5  -1  246.25   25.07   2
  -8  -5   1  288.10   29.33   3
  -7  -5   1  351.07   29.84   1
  -7  -5   1  375.58   33.47   3
   7   5  -1  315.70   29.83   2
  -6  -5   1   26.50   10.49   3
   6   5  -1   19.77    7.91   2
  -6  -5   1   47.53   13.37   1
   5   5  -1  941.74   68.84   2
  -5  -5   1 1023.05   72.22   3
  -5  -5   1  902.74   66.64   1
  -4  -5   1  148.20   16.49   3
  -4  -5   1  161.72   22.67   1
   4   5  -1   99.26   14.41   2
  -3  -5   1  945.72   66.49   3
   3   5  -1  878.05   64.34   2
  -3  -5   1  881.42   65.37   1
  -2  -5   1 1236.15   81.46   3
   2   5  -1  990.02   78.79   2
  -2  -5   1 1177.58   79.42   1
  -1  -5   1    7.43   11.03   1
   1   5  -1    9.72    5.84   2
  -1  -5   1    9.81    4.76   3
   0  -5   1   21.35   11.07   1
   0   5  -1   18.14    6.39   2
   0  -5   1   17.38    4.66   3
  -1   5  -1   22.78    7.55   2
   1  -5   1   25.37   10.54   1
  -2   5  -1 2950.75  195.20   2
   2  -5   1 2828.84  180.49   1
   3  -5   1  108.49   16.59   1
  -3   5  -1   97.84   13.31   2
   4  -5   1  681.59   43.61   4
   4  -5   1  613.04   47.37   1
  -4   5  -1  637.30   48.58   2
   5  -5   1 1106.04   69.09   4
   5  -5   1 1149.43   76.58   1
  -5   5  -1 1080.74   79.90   2
   6  -5   1  607.58   44.29   1
  -6   5  -1  528.80   43.82   2
   6  -5   1  494.45   38.44   4
   7  -5   1   71.26   15.94   1
  -7   5  -1   72.13   15.32   2
   7  -5   1   61.79   13.91   4
   8  -5   1   53.80   13.18   4
   8  -5   1   30.78   14.05   1
  -8   5  -1   32.72   13.62   2
  -9   5  -1 1080.64   81.13   2
   9  -5   1 1054.50   76.56   1
   9  -5   1 1033.76   68.28   4
  10  -5   1  131.10   20.43   4
  10  -5   1  173.94   25.66   1
 -10   5  -1  155.36   24.11   2
  11  -5   1  141.68   20.90   4
  11  -5   1   93.62   21.72   1
 -11   5  -1  102.72   20.79   2
  12  -5   1  491.52   40.63   4
  12  -5   1  556.10   47.26   1
 -12   5  -1  515.67   49.78   2
 -13   5  -1  223.53   33.74   2
  13  -5   1  257.66   29.10   4
  13  -5   1  292.81   35.74   1
 -14   5  -1  112.31   25.50   2
  14  -5   1  111.82   17.98   4
  14  -5   1  182.55   28.36   1
  15  -5   1   81.36   22.34   1
  15  -5   1   38.09   12.99   4
  16  -5   1  316.30   28.33   4
  16  -5   1  309.40   39.29   1
  15   4  -1  343.65   43.64   3
  14   4  -1   50.22   18.42   3
  13   4  -1   30.20   14.30   3
 -12  -4   1  393.58   41.60   3
 -11  -4   1   24.91   13.09   3
 -10  -4   1  233.02   23.18   1
 -10  -4   1  261.60   30.31   3
  -9  -4   1   40.89   11.08   1
  -9  -4   1   39.60   13.88   3
  -8  -4   1  855.64   65.75   3
  -8  -4   1  796.90   56.03   1
   8   4  -1  815.10   61.69   2
   7   4  -1  606.03   49.66   2
  -7  -4   1  694.72   53.47   3
  -7  -4   1  666.89   46.31   1
  -6  -4   1  277.29   25.94   3
   6   4  -1  265.60   23.17   2
  -6  -4   1  233.11   22.90   1
   5   4  -1  672.31   54.54   2
  -5  -4   1  817.58   53.51   1
  -5  -4   1  777.51   57.99   3
  -4  -4   1   11.34   10.78   1
  -4  -4   1   -1.14    5.40   3
   4   4  -1   -6.81    4.50   2
  -3  -4   1 1192.51   88.40   1
  -3  -4   1 1446.47   95.49   3
   3   4  -1 1368.94   92.29   2
   2   4  -1   13.73    5.71   2
  -2  -4   1   24.44    5.93   3
  -2  -4   1   17.43   12.03   1
  -1  -4   1  639.62   46.36   3
   1   4  -1  600.90   45.71   2
  -1  -4   1  681.68   47.61   1
   0   4  -1 1466.45  104.63   2
   0  -4   1 1518.12  106.34   3
   0  -4   1 1631.54   99.71   1
  -1   4  -1  104.24   11.31   2
   1  -4   1  109.66   14.85   1
  -1   4  -1   86.28    8.80   3
   2  -4   1  140.20   16.48   1
  -2   4  -1  123.84   13.62   2
   3  -4   1  202.10   19.23   4
  -3   4  -1  221.90   19.92   2
   3  -4   1  221.21   21.19   1
   4  -4   1 2010.40  110.26   4
  -4   4  -1 1908.42  131.73   2
   4  -4   1 1840.62  121.89   1
  -5   4  -1  345.32   27.20   2
   5  -4   1  255.02   23.62   4
   5  -4   1  290.12   26.93   1
  -6   4  -1   86.38   14.32   2
   6  -4   1   72.60   15.53   1
   6  -4   1   85.95    9.69   3
   6  -4   1   84.77   14.20   4
  -7   4  -1 1114.80   82.56   2
   7  -4   1 1138.83   80.93   3
   7  -4   1 1208.94   78.37   1
   7  -4   1 1071.94   69.75   4
   8  -4   1  119.56   17.53   4
  -8   4  -1  115.30   18.45   2
   8  -4   1  121.21   19.35   1
  -9   4  -1    7.48   10.73   2
   9  -4   1   -1.74    7.74   4
   9  -4   1   11.34    9.88   1
 -10   4  -1    2.50   12.07   2
  10  -4   1    1.47    9.92   1
  10  -4   1    7.79    8.76   4
  11  -4   1  775.70   50.84   4
 -11   4  -1  647.75   59.04   2
  11  -4   1  694.28   55.53   1
  12  -4   1  114.50   18.66   4
  12  -4   1   97.39   20.49   1
 -12   4  -1   71.89   19.60   2
  13  -4   1   -3.31   10.87   1
  13  -4   1    5.32    9.10   4
 -13   4  -1   13.99   13.65   2
  14  -4   1  281.27   29.22   4
 -14   4  -1  252.35   33.62   2
  14  -4   1  249.69   31.98   1
  15  -4   1    7.72    9.96   4
  15  -4   1  -15.24   12.39   1
  15   3  -1   29.04   14.58   3
  14   3  -1  200.61   31.34   3
  13   3  -1  196.21   30.00   3
 -12  -3   1  429.91   43.68   3
 -11  -3   1  182.41   20.23   1
 -11  -3   1  132.16   23.41   3
 -10  -3   1  763.25   60.48   3
 -10  -3   1  663.29   49.68   1
  -9  -3   1   14.03    8.23   1
   9   3  -1   16.04    8.65   2
  -9  -3   1    5.45    9.78   3
  -8  -3   1  115.09   14.82   1
   8   3  -1   86.30   14.21   2
  -8  -3   1  117.24   17.77   3
  -7  -3   1  159.56   16.68   1
   7   3  -1  140.23   16.18   2
  -7  -3   1  155.17   19.05   3
  -6  -3   1  434.19   31.86   1
  -6  -3   1  414.28   36.05   3
   6   3  -1  444.56   34.01   2
  -5  -3   1 3136.31  210.85   3
  -5  -3   1 2876.96  185.28   1
   5   3  -1 3049.68  203.47   2
   4   3  -1   92.05   11.97   2
  -4  -3   1  137.09   15.83   1
  -4  -3   1  127.05   14.24   3
  -3  -3   1 1486.18  101.17   1
  -3  -3   1 1741.64  112.04   3
   3   3  -1 1533.63  107.73   2
  -2  -3   1  227.52   23.09   1
  -2  -3   1  245.53   19.50   3
   2   3  -1  220.76   18.70   2
  -1  -3   1  113.31   11.04   3
  -1  -3   1  120.93   16.36   1
   1   3  -1  111.39   11.35   2
   0  -3   1   -2.20    7.57   1
   0  -3   1    5.06    2.86   3
   0   3  -1    8.46    4.57   2
  -1   3  -1  166.47   14.37   2
   1  -3   1  148.46   15.93   1
  -2   3  -1 2051.16  133.07   2
   2  -3   1 1930.81  109.96   4
   2  -3   1 1925.61  122.66   1
  -3   3  -1    9.85    5.61   2
   3  -3   1    8.80    6.80   1
   3  -3   1   14.06    6.90   4
  -4   3  -1 1220.79   85.22   2
   4  -3   1 1197.69   71.33   4
   4  -3   1 1244.69   79.58   1
  -5   3  -1  808.31   59.39   2
   5  -3   1  909.85   56.85   1
   5  -3   1  778.93   50.35   4
  -5   3  -1  759.00   57.47   3
  -6   3  -1 3889.23  252.67   2
   6  -3   1 3661.06  230.60   1
   6  -3   1 3662.04  206.87   4
  -6   3  -1 3746.14  256.77   3
  -7   3  -1   -2.42    7.41   2
   7  -3   1   12.33    7.78   4
   7  -3   1    9.21    8.39   1
  -7   3  -1    6.39    4.90   3
   8  -3   1   65.35   14.17   1
  -8   3  -1   78.69   14.94   2
   8  -3   1   67.18   13.23   4
  -8   3  -1   60.02   10.15   3
  -9   3  -1 1676.29  117.20   2
   9  -3   1 1498.18  106.95   1
  -9   3  -1 1818.12  117.09   3
   9  -3   1 1509.33   96.43   4
  10  -3   1  362.17   33.32   1
 -10   3  -1  332.00   35.21   2
  10  -3   1  369.63   30.45   4
  11  -3   1   20.03    9.82   4
 -11   3  -1   46.00   13.75   2
  11  -3   1   39.83   14.16   1
  12  -3   1   55.13   14.10   4
  12  -3   1   58.75   15.75   1
 -12   3  -1   54.58   17.10   2
  13  -3   1  467.81   41.93   1
  13  -3   1  497.01   37.98   4
 -13   3  -1  463.69   45.49   2
  14  -3   1  156.56   21.17   4
  14  -3   1  178.61   25.98   1
  15  -3   1   19.16   10.27   4
  15  -3   1    6.01   12.10   1
  16   2  -1   12.61   16.58   3
  15   2  -1  346.39   39.45   3
  14   2  -1  121.99   24.48   3
  13   2  -1   17.82   13.72   3
 -12  -2   1  584.90   46.77   1
 -12  -2   1  709.52   58.87   3
  12   2  -1  667.01   59.23   3
 -11  -2   1  109.81   16.67   1
 -11  -2   1  135.94   22.38   3
 -10  -2   1  210.02   21.25   1
 -10  -2   1  243.01   27.14   3
  -9  -2   1    2.98    7.42   1
   9   2  -1   12.07    8.98   2
  -9  -2   1    9.03    9.89   3
  -8  -2   1  438.58   38.14   3
  -8  -2   1  434.76   31.85   1
   8   2  -1  423.58   36.03   2
  -7  -2   1 1052.17   68.15   1
  -7  -2   1 1042.06   78.79   3
   7   2  -1 1067.68   75.70   2
  -6  -2   1  467.42   36.98   3
   6   2  -1  444.47   34.72   2
  -6  -2   1  418.12   31.29   1
   5   2  -1  597.72   44.40   2
  -5  -2   1  584.52   40.86   1
  -5  -2   1  634.53   47.02   3
  -4  -2   1  140.58   14.07   1
  -4  -2   1  122.00   14.05   3
   4   2  -1  139.30   13.22   2
  -3  -2   1 2362.40  138.38   1
   3   2  -1 2213.72  150.48   2
  -3  -2   1 2160.15  155.63   3
  -2  -2   1    2.70    3.91   3
  -2  -2   1    5.29    8.17   1
   2   2  -1    1.43    3.60   2
  -1  -2   1  339.15   27.10   1
   1   2  -1  310.36   24.50   2
  -1  -2   1  372.87   25.41   3
   0   2  -1 1977.97  133.71   2
   0  -2   1 1866.74  137.06   3
   0  -2   1 2165.95  124.29   1
  -1   2  -1   28.41    5.13   2
   1  -2   1   28.58    7.23   1
   2  -2   1  321.59   24.72   1
   2  -2   1  345.18   22.66   4
  -2   2  -1  337.89   25.25   2
   3  -2   1  127.05   13.25   1
  -3   2  -1  106.87   12.26   2
   3  -2   1  115.93   11.58   4
   4  -2   1 3653.12  196.43   4
  -4   2  -1 3513.37  240.13   2
   4  -2   1 3598.06  219.04   1
  -5   2  -1   21.57    7.43   2
   5  -2   1    7.59    8.03   1
   5  -2   1   20.07    7.19   4
  -5   2  -1   16.00    4.87   3
  -6   2  -1    2.31    5.09   1
  -6   2  -1    1.00    4.46   3
  -6   2  -1   13.76    7.75   2
  -7   2  -1  849.39   64.57   3
  -7   2  -1  939.32   57.89   1
  -7   2  -1  858.06   65.17   2
  -8   2  -1  215.08   18.88   1
  -8   2  -1  235.80   23.39   2
  -8   2  -1  183.62   20.23   3
  -9   2  -1   31.18   12.41   2
  -9   2  -1   52.19   10.65   1
  -9   2  -1   52.43   10.78   3
 -10   2  -1   27.99   10.10   1
 -10   2  -1   22.02   12.10   2
 -10   2  -1   25.51    9.27   3
 -11   2  -1  960.14   71.79   3
 -11   2  -1  935.83   62.51   1
 -11   2  -1  864.89   71.15   2
 -12   2  -1    8.21    9.40   1
 -12   2  -1    7.26   11.72   2
  13  -2   1    3.64   12.74   1
  13  -2   1   13.94    8.51   4
 -13   2  -1   33.37   13.63   2
  14  -2   1  265.22   31.71   1
  14  -2   1  243.81   26.67   4
  16   1  -1   30.10   15.80   3
  15   1  -1  -21.58   11.29   3
  14   1  -1   56.84   16.94   3
  13   1  -1  694.33   60.76   3
 -13  -1   1  641.53   48.03   1
  12   1  -1  670.54   59.02   3
 -12  -1   1  640.63   47.39   1
 -11  -1   1   53.73   15.77   3
 -11  -1   1   64.23   13.00   1
 -10  -1   1  609.96   43.67   1
 -10  -1   1  633.50   52.42   3
  10   1  -1  599.12   50.49   2
  -9  -1   1   20.96    8.45   1
  -9  -1   1    9.53   10.11   3
   9   1  -1   24.08   10.64   2
  -8  -1   1   55.15   10.17   1
  -8  -1   1   59.91   12.69   3
   8   1  -1   67.14   12.68   2
   7   1  -1   -1.04    6.96   2
  -7  -1   1   12.96    6.34   1
  -7  -1   1    4.28    6.64   3
  -6  -1   1 1524.02   92.81   1
   6   1  -1 1530.17  103.18   2
  -6  -1   1 1387.72  105.86   3
  -5  -1   1 2398.25  172.19   3
   5   1  -1 2570.24  167.18   2
  -5  -1   1 2444.79  150.97   1
  -4  -1   1    0.25    4.64   1
  -4  -1   1    2.72    4.42   3
   4   1  -1    5.76    4.94   2
  -3  -1   1  995.07   61.59   1
   3   1  -1  998.99   67.09   2
  -3  -1   1  948.10   69.54   3
   2   1  -1  355.06   24.65   2
  -2  -1   1  360.91   24.31   1
  -2  -1   1  324.52   25.91   3
   0   1  -1   25.15    3.39   3
   0  -1   1   31.29    5.74   1
   0   1  -1   22.79    3.04   2
   1  -1   1 1916.04  119.79   1
  -1   1  -1 2024.21  131.24   2
   2  -1   1 3696.69  216.54   1
   2  -1   1 3652.90  193.83   4
  -2   1  -1 3410.88  238.09   2
   3  -1   1  160.82   14.30   1
  -3   1  -1  144.13   13.87   2
   3  -1   1  160.04   13.14   4
  -4   1  -1  209.45   19.03   3
  -4   1  -1  252.36   17.63   1
  -4   1  -1  258.24   20.26   2
  -5   1  -1  134.47   12.13   1
  -5   1  -1  116.41   13.21   3
  -5   1  -1  139.23   14.67   2
  -6   1  -1 2189.75  155.16   2
  -6   1  -1 2306.33  158.90   3
  -6   1  -1 2335.22  139.59   1
  -7   1  -1  172.51   18.54   2
  -7   1  -1  149.43   16.76   3
  -7   1  -1  140.24   14.44   1
  -8   1  -1  170.95   18.79   3
  -8   1  -1  180.30   20.24   2
  -8   1  -1  160.64   16.00   1
  -9   1  -1 2333.13  150.08   1
  -9   1  -1 2377.61  167.76   2
  -9   1  -1 2573.64  172.40   3
 -10   1  -1   -0.43    7.55   3
 -10   1  -1    4.94    7.19   1
 -10   1  -1   -0.03    8.24   2
 -11   1  -1  145.22   17.84   1
 -11   1  -1  154.62   22.07   2
 -11   1  -1  169.79   21.92   3
 -12   1  -1   62.56   15.62   2
 -12   1  -1   28.91   13.22   3
 -12   1  -1   40.77   11.18   1
 -13   1  -1  329.48   29.29   1
  13  -1   1  375.38   37.12   3
  15   0  -1  443.21   44.93   3
  14   0  -1  149.86   24.75   3
  13   0  -1   -1.94   10.99   3
 -13   0   1  -16.88    8.75   1
 -12   0   1  269.77   25.37   1
  12   0  -1  287.89   31.38   3
  11   0  -1  476.58   45.27   3
 -11   0   1  521.84   37.97   1
 -10   0   1  264.08   30.10   3
 -10   0   1  260.14   24.76   1
 -10   0   1  353.62   27.83   2
  -9   0   1   49.51   10.21   2
  -9   0   1   43.52   11.64   3
  -9   0   1   30.16    9.76   1
  -8   0   1 1844.37  116.97   1
  -8   0   1 1967.23  128.88   2
  -8   0   1 1800.68  133.74   3
  -7   0   1  556.23   38.92   1
  -7   0   1  556.90   38.93   1
  -7   0   1  526.03   44.49   3
  -7   0   1  629.41   42.59   2
  -6   0   1    7.53    5.92   3
  -6   0   1   13.91    6.32   1
  -6   0   1   11.18    5.54   2
  -5   0   1   15.27    5.44   2
  -5   0   1   22.53    6.26   1
  -5   0   1   17.48    6.24   3
  -4   0   1   36.80    6.00   2
  -4   0   1   36.57    6.40   1
  -4   0   1   40.97    7.11   3
  -3   0   1 3938.50  224.80   1
  -3   0   1 3805.12  247.37   2
  -3   0   1 3448.09  255.39   3
  -2   0   1  616.45   39.35   2
  -2   0   1  569.04   36.45   1
  -2   0   1  550.82   41.11   3
  -1   0   1 2057.33  123.07   1
   1   0  -1 2027.94  140.12   3
   0   0  -1   -1.15    1.95   3
   0   0   1    1.68    1.36   1
  -1   0  -1 1108.02   76.25   3
  -2   0  -1  131.31   11.10   2
  -2   0  -1  137.14    9.25   1
  -2   0  -1  120.16   11.10   3
  -3   0  -1 2791.36  183.70   2
  -3   0  -1 2711.38  189.00   3
  -4   0  -1 4009.31  274.30   2
  -4   0  -1 4488.54  247.84   1
  -4   0  -1 3859.07  282.22   3
  -5   0  -1  159.93   13.03   1
  -5   0  -1  158.45   15.37   2
  -5   0  -1  145.86   15.27   3
  -6   0  -1  430.18   29.08   1
  -6   0  -1  443.57   33.11   2
  -6   0  -1  381.58   33.74   3
  -7   0  -1 1753.73  107.48   1
  -7   0  -1 1656.51  119.48   2
  -7   0  -1 1789.53  123.74   3
  -8   0  -1 1207.95   75.87   1
  -8   0  -1 1221.63   85.08   2
  -8   0  -1 1143.42   87.54   3
  -9   0  -1   15.68    8.96   2
  -9   0  -1   15.31    9.70   3
  -9   0  -1   24.42    7.79   1
 -10   0  -1   60.40   11.13   1
 -10   0  -1   51.46   14.13   3
 -10   0  -1   62.75   14.05   2
 -11   0  -1 1334.89  103.10   3
 -11   0  -1 1388.61   88.53   1
 -11   0  -1 1390.29  100.18   2
  12   0   1   35.52   17.51   2
 -12   0  -1   52.89   15.20   3
 -12   0  -1   38.76   10.93   1
 -13   0  -1   22.39   13.08   3
  14   0   1  304.27   34.59   3
 -14   1   1   19.11   10.63   1
  13  -1  -1  667.69   59.26   3
 -13   1   1  700.93   50.11   1
 -12   1   1  176.05   20.47   1
  12  -1  -1  158.06   24.44   3
 -11   1   1   93.93   15.44   2
 -11   1   1   93.26   15.35   1
  11  -1  -1   94.39   18.14   3
 -10   1   1 1062.45   71.48   2
 -10   1   1  953.65   64.07   1
  10  -1  -1  850.82   74.21   3
  -9   1   1   79.86   13.49   2
  -9   1   1   63.47   12.26   1
   9  -1  -1  107.05   17.59   3
  -8   1   1  602.37   42.41   1
  -8   1   1  619.69   47.08   2
  -8   1   1  622.56   48.86   3
  -7   1   1   62.25   10.82   2
  -7   1   1   67.82   11.39   3
  -7   1   1   74.83   10.91   1
  -6   1   1 1335.05   83.29   1
  -6   1   1 1309.85   94.40   3
  -6   1   1 1317.14   91.62   2
  -5   1   1  509.32   39.31   3
  -5   1   1  541.70   35.21   1
  -5   1   1  505.71   38.13   2
  -4   1   1    1.52    3.96   2
  -4   1   1    2.69    3.91   3
  -4   1   1    8.72    4.63   1
   3  -1  -1 1907.36  130.11   3
  -3   1   1 1827.32  114.30   1
  -3   1   1 1895.99  125.78   2
  -2   1   1  135.38   10.88   1
   2  -1  -1  146.36   12.15   3
  -2   1   1  131.44   11.24   2
  -1   1   1 3619.17  222.44   1
  -1   1   1 3580.54  245.69   2
   1  -1  -1 3939.10  254.00   3
   0  -1  -1   32.55    3.16   3
   0   1   1   21.96    2.24   1
   0   1   1   31.11    3.13   2
   1   1   1  429.11   30.20   2
  -1  -1  -1  435.82   30.85   3
   2   1   1 1314.72   93.09   2
  -2  -1  -1 1426.22   83.04   1
  -2  -1  -1 1385.87   95.53   3
  -3  -1  -1 1071.74   74.24   3
  -3  -1  -1 1036.05   64.08   1
   3   1   1 1035.10   72.80   2
  -4  -1  -1  110.74   12.21   3
   4   1   1  110.12   13.47   2
  -4  -1  -1  115.47    9.74   1
  -5  -1  -1   28.05    7.38   3
  -5  -1  -1   43.32    7.89   2
  -5  -1  -1   41.29    6.48   1
  -6  -1  -1 2186.33  130.92   1
  -6  -1  -1 2080.65  150.46   3
  -6  -1  -1 2148.34  145.38   2
  -7  -1  -1  395.46   28.15   1
  -7  -1  -1  414.20   32.22   2
  -7  -1  -1  383.83   34.00   3
  -8  -1  -1  507.64   40.77   3
  -8  -1  -1  441.15   33.29   1
   8   1   1  492.68   42.14   2
  -9  -1  -1  696.79   47.63   1
   9   1   1  712.08   58.18   2
  -9  -1  -1  723.54   57.19   3
 -10  -1  -1  415.52   32.66   1
  10   1   1  454.38   42.49   2
 -10  -1  -1  481.41   41.33   3
 -11  -1  -1    4.29    8.16   1
  11   1   1   26.52   13.99   2
 -11  -1  -1   36.20   12.30   3
 -12  -1  -1   82.05   18.68   3
 -12  -1  -1  100.93   13.97   1
 -13  -1  -1  969.18   79.10   3
 -14  -1  -1  174.99   27.81   3
  15   1   1   53.30   17.22   3
 -15   2   1  685.97   51.01   1
 -14   2   1   59.58   14.07   1
 -13   2   1   19.50   10.86   1
 -12   2   1   11.50    9.64   1
  12  -2  -1   20.69   10.64   3
 -11   2   1  335.77   28.55   1
  11  -2  -1  333.59   32.51   3
 -11   2   1  312.76   31.59   2
 -10   2   1  218.43   22.26   1
 -10   2   1  213.16   24.92   2
  10  -2  -1  281.43   27.65   3
  -9   2   1   28.27   10.96   2
   9  -2  -1   23.06   10.70   3
  -9   2   1   29.62    9.58   1
  -8   2   1 1531.01  112.67   2
  -8   2   1 1623.35  101.81   1
   8  -2  -1 1671.25  116.67   3
   7  -2  -1   83.37   12.70   3
  -7   2   1   64.24   11.82   2
  -7   2   1   82.70   11.51   1
  -6   2   1  402.59   28.18   1
  -6   2   1  375.05   30.71   2
   6  -2  -1  370.68   31.39   3
  -5   2   1  120.91   13.36   2
  -5   2   1  137.30   13.11   1
   5  -2  -1  118.39   13.48   3
  -4   2   1 1290.52   87.87   1
   4  -2  -1 1478.40   99.94   3
  -4   2   1 1501.25   97.42   2
  -3   2   1  724.34   51.48   1
  -3   2   1  872.26   57.26   2
   3  -2  -1  866.72   58.56   3
  -2   2   1  306.79   23.27   2
  -2   2   1  312.92   21.13   1
   1  -2  -1 1311.78   72.13   4
   1  -2  -1 1360.70   90.10   3
   1  -2  -1 1270.86   80.33   1
  -1   2   1 1279.61   87.99   2
   0  -2  -1 2161.57  125.37   1
   0  -2  -1 1982.04  112.13   4
   0   2   1 2130.69  138.30   2
   0  -2  -1 1995.28  141.60   3
  -1  -2  -1  987.03   63.17   1
   1   2   1 1017.12   69.36   2
  -1  -2  -1 1044.69   71.02   3
  -2  -2  -1 1416.75  105.00   3
   2   2   1 1602.57  102.52   2
  -3  -2  -1  964.10   55.29   1
   3   2   1  925.74   62.48   2
  -3  -2  -1  775.45   63.48   3
  -4  -2  -1 2873.63  193.97   3
  -4  -2  -1 2749.04  168.95   1
   4   2   1 2770.48  188.69   2
  -5  -2  -1    7.96    6.14   3
   5   2   1    7.84    6.96   2
  -5  -2  -1    5.09    4.22   1
  -6  -2  -1   25.81    6.32   1
   6   2   1   18.34    9.03   2
  -6  -2  -1   18.17    8.20   3
   7   2   1  318.07   28.13   2
  -7  -2  -1  280.92   21.52   1
  -7  -2  -1  269.41   27.09   3
   8   2   1  960.15   70.42   2
  -8  -2  -1  943.68   71.31   3
  -8  -2  -1  878.17   59.69   1
  -9  -2  -1   76.69   10.98   1
   9   2   1   67.60   15.63   2
  -9  -2  -1   81.27   15.76   3
 -10  -2  -1   60.61   15.71   3
  10   2   1   66.02   16.30   2
 -10  -2  -1  106.65   13.20   1
 -11  -2  -1 1468.01  100.88   1
 -11  -2  -1 1744.82  120.65   3
  11   2   1 1576.53  117.44   2
 -12  -2  -1   -5.87    9.82   3
 -13  -2  -1   -1.61   11.56   3
 -14  -2  -1   25.18   14.29   3
 -15  -2  -1  186.02   31.22   3
  15   2   1  226.41   32.54   3
  16   2   1   89.67   20.72   3
  15  -3  -1   56.16   13.11   4
  15  -3  -1   69.88   20.10   1
 -14   3   1   19.35   11.17   1
 -13   3   1  510.17   39.84   1
 -12   3   1   83.54   15.91   1
 -11   3   1   19.71   10.44   1
 -11   3   1   11.18   12.09   2
  10  -3  -1  736.46   55.52   3
 -10   3   1  682.77   48.21   1
 -10   3   1  602.84   53.71   2
  -9   3   1  484.07   37.43   1
   9  -3  -1  520.85   42.73   3
  -9   3   1  505.55   42.53   2
  -8   3   1 1051.23   81.42   2
  -8   3   1 1156.80   73.56   1
   8  -3  -1 1168.17   83.38   3
   7  -3  -1  135.20   15.18   3
  -7   3   1  119.65   14.22   1
  -7   3   1  126.02   16.19   2
   6  -3  -1 1461.43  106.59   3
  -6   3   1 1622.55   94.94   1
  -6   3   1 1426.53  104.56   2
  -5   3   1  265.83   22.70   2
  -5   3   1  240.68   19.90   1
   5  -3  -1  250.33   21.82   3
  -4   3   1   21.18    6.20   1
  -4   3   1   31.64    7.63   2
   4  -3  -1   31.97    6.53   3
  -3   3   1   16.08    5.55   2
   3  -3  -1    8.36    5.04   3
  -3   3   1   10.58    4.29   1
   2  -3  -1 1749.53  117.43   3
   2  -3  -1 1705.22   95.05   4
   2  -3  -1 1686.19  105.85   1
  -2   3   1 1675.14  115.32   2
  -1   3   1 7885.60  523.16   2
   1  -3  -1 7841.99  474.53   1
   1  -3  -1 7990.81  424.79   4
   0  -3  -1   37.72    7.29   1
   0  -3  -1   28.38    5.26   3
   0   3   1   45.88    6.87   2
  -1  -3  -1 1273.75   86.62   3
   1   3   1 1236.55   84.79   2
  -1  -3  -1 1202.19   77.94   1
  -2  -3  -1 1933.34  122.61   3
   2   3   1 1756.67  119.15   2
  -2  -3  -1 1577.17  108.87   1
  -3  -3  -1 1036.68   66.42   1
   3   3   1  982.35   72.96   2
  -3  -3  -1 1120.66   75.33   3
  -4  -3  -1   24.26    6.99   3
  -4  -3  -1   26.32    6.68   1
   4   3   1   19.08    7.51   2
   5   3   1  207.31   19.81   2
  -5  -3  -1  194.38   16.25   1
  -5  -3  -1  210.86   20.80   3
   6   3   1 2411.52  164.83   2
  -6  -3  -1 2359.53  169.49   3
  -6  -3  -1 2439.53  146.92   1
   7   3   1   66.97   12.87   2
  -7  -3  -1   58.32   12.73   3
  -7  -3  -1   61.00    8.99   1
   8   3   1  200.84   22.11   2
  -8  -3  -1  203.80   22.99   3
  -8  -3  -1  164.26   16.45   1
  -9  -3  -1  227.16   19.04   1
  -9  -3  -1  235.43   26.36   3
   9   3   1  210.52   25.37   2
 -10  -3  -1  467.26   34.17   1
 -10  -3  -1  491.17   43.62   3
  10   3   1  462.58   42.02   2
 -11  -3  -1    9.65   11.13   3
  11   3   1   -6.16   10.08   2
 -12  -3  -1   20.53   13.69   3
 -13  -3  -1 1126.94   90.73   3
 -14  -3  -1   -8.90   11.37   3
 -15  -3  -1   -6.02   13.97   3
  16   3   1  177.38   31.08   3
  16  -4  -1   16.33   10.93   4
  16  -4  -1   15.94   14.22   1
  15  -4  -1  375.49   32.80   4
  15  -4  -1  334.66   39.20   1
  14  -4  -1    2.29   12.51   1
  14  -4  -1   16.69    9.87   4
  13  -4  -1   37.65   16.01   1
  13  -4  -1   32.11   11.43   4
 -12   4   1   28.31   12.80   2
  12  -4  -1    7.88   10.32   4
  12  -4  -1  -17.08   12.49   1
 -11   4   1  714.10   49.32   1
 -11   4   1  623.88   55.88   2
 -10   4   1  262.52   24.59   1
 -10   4   1  248.06   28.95   2
  -9   4   1  122.16   16.32   1
  -9   4   1   83.56   17.09   2
  -8   4   1  749.51   58.99   2
  -8   4   1  694.51   52.00   1
   8  -4  -1  848.58   59.06   3
  -7   4   1  326.34   26.48   1
  -7   4   1  326.54   30.00   2
   7  -4  -1  350.33   28.74   3
  -6   4   1  294.68   26.26   2
  -6   4   1  263.00   22.31   1
   6  -4  -1  289.31   24.26   3
   5  -4  -1  264.50   21.74   4
   5  -4  -1  237.04   21.34   3
   5  -4  -1  264.46   23.79   1
  -5   4   1  239.10   22.98   2
   4  -4  -1 3694.62  201.93   4
  -4   4   1 3744.26  246.18   2
   4  -4  -1 3552.99  224.87   1
  -3   4   1 1519.68  103.36   2
   3  -4  -1 1451.88   95.38   1
   3  -4  -1 1530.78   85.99   4
   2  -4  -1  479.67   31.38   4
  -2   4   1  471.67   36.08   2
   2  -4  -1  493.48   34.91   1
  -1   4   1 1371.00   94.24   2
   1  -4  -1 1380.71   78.11   4
   1  -4  -1 1372.15   86.97   1
   0   4   1   22.88    6.28   2
   0  -4  -1   22.95    7.06   1
   0  -4  -1   14.92    4.71   3
  -1  -4  -1 2326.96  163.41   3
  -1  -4  -1 2355.68  146.64   1
   1   4   1 2416.63  159.95   2
   2   4   1   13.27    6.16   2
  -2  -4  -1   21.11    6.00   3
  -2  -4  -1   24.90    9.28   1
  -3  -4  -1  933.80   62.78   3
   3   4   1  896.47   61.37   2
  -3  -4  -1  730.66   56.71   1
   4   4   1 2320.77  166.99   2
  -4  -4  -1 2651.01  172.45   3
  -4  -4  -1 2407.42  151.72   1
   5   4   1  200.38   20.35   2
  -5  -4  -1  206.54   20.85   3
  -5  -4  -1  202.50   17.85   1
  -6  -4  -1   53.15   11.53   3
   6   4   1   50.32   11.51   2
  -6  -4  -1   50.78    8.94   1
   7   4   1   48.08   11.94   2
  -7  -4  -1   78.30   10.01   1
  -7  -4  -1   62.52   13.32   3
   8   4   1  658.49   51.36   2
  -8  -4  -1  617.36   52.75   3
  -8  -4  -1  654.69   43.51   1
   9   4   1  105.44   17.58   2
  -9  -4  -1  123.73   14.24   1
  -9  -4  -1  135.15   20.45   3
  10   4   1   75.50   16.28   2
 -10  -4  -1   69.41   16.17   3
 -11  -4  -1  720.59   61.46   3
 -12  -4  -1   93.22   20.54   3
 -13  -4  -1   37.24   15.52   3
 -14  -4  -1   14.75   13.99   3
 -15  -4  -1  481.55   49.78   3
  16  -5  -1  300.98   27.65   4
  16  -5  -1  321.33   37.39   1
  15  -5  -1   15.46   10.65   4
  15  -5  -1   39.92   15.10   1
  14  -5  -1   24.03   13.31   1
  14  -5  -1    0.00    8.79   4
  13  -5  -1  766.90   54.50   4
  13  -5  -1  751.19   60.29   1
 -12   5   1   35.83   14.94   2
  12  -5  -1   10.80   12.17   1
  12  -5  -1   33.75   12.11   4
 -11   5   1   13.85   13.71   2
  11  -5  -1   11.20    9.81   4
  11  -5  -1    9.61   11.74   1
 -10   5   1   48.42   15.47   2
  10  -5  -1   31.06   12.37   4
  10  -5  -1   43.87   15.39   1
   9  -5  -1  401.49   36.59   1
  -9   5   1  401.47   38.40   2
   9  -5  -1  418.37   33.64   4
   8  -5  -1  512.63   41.01   1
   8  -5  -1  488.01   36.78   4
  -8   5   1  463.84   41.78   2
  -7   5   1  110.36   17.31   2
   7  -5  -1  108.34   18.19   1
   7  -5  -1  125.33   17.31   4
  -6   5   1 1735.89  126.58   2
   6  -5  -1 1874.88  106.49   4
   6  -5  -1 1840.61  118.12   1
  -5   5   1  283.99   24.92   2
   5  -5  -1  269.47   25.31   1
   5  -5  -1  246.86   22.90   4
   4  -5  -1 1192.29   80.16   1
  -4   5   1 1187.85   85.45   2
   4  -5  -1 1250.59   72.53   4
   3  -5  -1    1.23    7.33   1
   3  -5  -1    2.74    6.64   4
  -3   5   1    0.73    6.30   2
  -2   5   1 1065.91   74.91   2
   2  -5  -1 1078.76   63.59   4
   2  -5  -1 1041.96   70.19   1
  -1   5   1 1963.46  128.99   2
   1  -5  -1 1809.42  118.75   1
   0   5   1   87.12   11.21   2
   0  -5  -1   54.23    8.55   3
   0  -5  -1   91.02   13.49   1
  -1  -5  -1  495.08   38.82   3
   1   5   1  503.10   39.16   2
  -1  -5  -1  555.97   39.03   1
  -2  -5  -1  590.47   40.65   3
   2   5   1  448.41   39.43   2
  -2  -5  -1  537.08   40.41   1
  -3  -5  -1 1467.11  105.59   1
   3   5   1 1688.43  113.62   2
  -3  -5  -1 1758.06  116.42   3
  -4  -5  -1   87.43   12.75   3
  -4  -5  -1   93.81   15.58   1
   4   5   1   67.62   11.93   2
   5   5   1 1520.91  104.26   2
  -5  -5  -1 1441.08  107.02   3
  -5  -5  -1 1480.08   94.87   1
  -6  -5  -1 1891.85  124.12   3
   6   5   1 1576.82  118.93   2
  -6  -5  -1 1636.56  107.04   1
   7   5   1   18.47    9.69   2
  -7  -5  -1   13.02    7.03   1
  -7  -5  -1   18.24    9.84   3
  -8  -5  -1  189.71   23.35   3
   8   5   1  169.98   22.21   2
  -8  -5  -1  203.58   17.75   1
   9   5   1  263.50   26.73   2
  -9  -5  -1  223.17   27.78   3
  10   5   1  433.87   39.39   2
 -10  -5  -1  433.49   41.96   3
 -11  -5  -1   81.45   18.82   3
 -12  -5  -1   63.88   17.34   3
 -13  -5  -1  558.05   53.04   3
 -14  -5  -1   66.13   21.32   3
 -15  -5  -1   19.58   16.00   3
  15  -6  -1  280.15   31.10   4
  15  -6  -1  270.34   36.47   1
  14  -6  -1  154.14   27.14   1
  14  -6  -1  154.80   23.16   4
 -13   6   1   19.27   15.03   2
  13  -6  -1   24.78   11.13   4
  13  -6  -1   31.93   14.73   1
 -12   6   1   30.17   15.77   2
  12  -6  -1   25.80   10.58   4
  12  -6  -1    4.93   10.90   1
  11  -6  -1 1111.79   80.50   1
  11  -6  -1 1113.85   72.73   4
 -11   6   1 1073.47   86.18   2
  10  -6  -1  276.52   29.54   4
 -10   6   1  240.15   31.79   2
  10  -6  -1  319.04   34.17   1
   9  -6  -1   27.69    9.22   4
   9  -6  -1   15.76   10.98   1
  -9   6   1   17.89   13.70   2
  -8   6   1  569.66   47.68   2
   8  -6  -1  518.61   40.26   4
   8  -6  -1  568.45   45.41   1
  -7   6   1   61.19   14.82   2
   7  -6  -1   79.48   16.74   1
   7  -6  -1   78.44   14.77   4
   6  -6  -1  286.95   29.33   1
   6  -6  -1  316.19   26.91   4
  -6   6   1  275.35   27.98   2
   5  -6  -1   17.58   10.86   1
  -5   6   1   23.07    9.56   2
   5  -6  -1    7.86    8.84   4
   4  -6  -1 3624.73  228.33   1
   4  -6  -1 3737.69  205.14   4
  -4   6   1 3677.10  248.69   2
   3  -6  -1  348.21   27.02   4
  -3   6   1  356.86   29.34   2
   3  -6  -1  322.99   29.09   1
   2  -6  -1  398.79   31.82   1
  -2   6   1  388.05   31.29   2
   2  -6  -1  356.13   28.19   4
   1  -6  -1  412.01   32.24   1
   1  -6  -1  331.84   29.04   3
  -1   6   1  428.40   32.17   2
   0   6   1  138.09   15.26   2
   0  -6  -1  141.25   17.89   1
   0  -6  -1   99.48   12.59   3
   1   6   1 1910.11  124.65   2
  -1  -6  -1 1673.14  115.55   1
  -1  -6  -1 1817.25  125.93   3
   2   6   1  372.47   32.02   2
  -2  -6  -1  393.30   33.97   1
  -2  -6  -1  414.98   32.16   3
  -3  -6  -1  718.06   50.69   3
   3   6   1  657.45   49.83   2
  -3  -6  -1  588.35   49.40   1
  -4  -6  -1  452.41   34.75   3
   4   6   1  393.15   33.63   2
  -4  -6  -1  360.78   33.88   1
   5   6   1  197.42   20.79   2
  -5  -6  -1  205.97   22.15   3
  -5  -6  -1  176.31   22.23   1
  -6  -6  -1  143.32   18.14   1
  -6  -6  -1  162.14   19.81   3
   6   6   1  108.39   17.11   2
  -7  -6  -1  164.31   21.02   3
  -7  -6  -1  165.86   18.16   1
   7   6   1  123.29   18.47   2
  -8  -6  -1 1097.06   84.71   3
   8   6   1 1042.14   81.09   2
  -8  -6  -1 1147.08   72.22   1
   9   6   1   37.29   13.25   2
  -9  -6  -1   45.61   13.30   3
 -10  -6  -1  201.65   27.23   3
 -11  -6  -1  242.24   31.36   3
 -12  -6  -1  110.94   22.03   3
 -13  -6  -1   18.24   14.22   3
 -14  -6  -1    6.98   15.30   3
  14  -7  -1   32.70   18.71   1
  14  -7  -1   17.45   12.75   4
 -13   7   1  471.07   48.47   2
  13  -7  -1  509.69   40.79   4
  13  -7  -1  473.93   46.81   1
  12  -7  -1   23.83   11.24   4
 -12   7   1   45.58   16.33   2
  12  -7  -1    8.96   14.88   1
 -11   7   1   72.19   19.42   2
  11  -7  -1   70.22   17.31   4
  11  -7  -1   51.81   20.33   1
  10  -7  -1   60.22   19.90   1
  10  -7  -1   58.78   15.30   4
 -10   7   1   54.35   17.24   2
   9  -7  -1  744.27   51.10   4
   9  -7  -1  639.95   55.80   1
  -9   7   1  683.37   58.28   2
   8  -7  -1  237.25   26.97   4
   8  -7  -1  273.36   32.01   1
  -8   7   1  245.36   29.61   2
   7  -7  -1   44.63   12.11   4
  -7   7   1   32.22   13.63   2
   7  -7  -1   28.47   13.80   1
  -6   7   1  764.58   61.26   2
   6  -7  -1  851.61   60.38   1
   6  -7  -1  773.34   53.96   4
   5  -7  -1    3.11    8.75   4
  -5   7   1    1.86    8.48   2
   5  -7  -1    1.73    9.14   1
  -4   7   1  646.86   50.71   2
   4  -7  -1  625.18   49.30   1
   4  -7  -1  684.84   45.65   4
  -3   7   1  466.96   36.15   2
   3  -7  -1  417.50   36.11   1
   3  -7  -1  426.43   33.03   4
  -2   7   1  561.74   41.03   2
   2  -7  -1  456.41   39.43   1
   1  -7  -1  685.46   48.18   1
   1  -7  -1  539.79   45.35   3
  -1   7   1  670.78   48.42   2
   0  -7  -1    1.36    9.23   1
   0  -7  -1    3.11    4.20   3
   0   7   1    3.45    6.57   2
   1   7   1  582.48   45.44   2
  -1  -7  -1  618.52   46.48   1
  -1  -7  -1  573.19   44.57   3
  -2  -7  -1    2.29    5.07   3
   2   7   1    0.10    7.11   2
  -2  -7  -1   10.25   10.94   1
  -3  -7  -1  597.25   50.73   1
  -3  -7  -1  684.26   50.24   3
   3   7   1  649.62   49.97   2
   4   7   1   40.83   10.87   2
  -4  -7  -1   31.76    9.85   3
  -4  -7  -1   44.42   16.39   1
  -5  -7  -1  106.61   16.79   3
   5   7   1  127.53   17.61   2
  -5  -7  -1  114.00   20.89   1
   6   7   1 1512.32  111.85   2
  -6  -7  -1 1628.64  115.98   3
  -7  -7  -1  303.23   30.26   3
   7   7   1  275.37   28.86   2
  -7  -7  -1  290.67   27.07   1
  -8  -7  -1  130.84   20.26   3
   8   7   1  123.69   19.32   2
   9   7   1    7.08   10.83   2
  -9  -7  -1   -0.99    9.51   3
 -10  -7  -1  698.67   60.22   3
 -11  -7  -1   64.21   16.00   3
 -12  -7  -1   14.18   13.10   3
 -13  -7  -1  277.40   36.32   3
 -14  -7  -1  -10.18   13.11   3
  14  -8  -1  166.04   30.25   1
  14  -8  -1  148.37   23.22   4
 -13   8   1  121.62   26.01   2
  13  -8  -1  109.16   26.84   1
  13  -8  -1  158.71   24.48   4
  12  -8  -1    2.33    9.67   4
 -12   8   1   19.00   14.80   2
  12  -8  -1   12.65   15.19   1
  11  -8  -1 1170.74   78.05   4
 -11   8   1 1158.95   92.54   2
  11  -8  -1 1154.29   86.95   1
 -10   8   1    7.55   14.40   2
  10  -8  -1   28.24   11.44   4
  10  -8  -1    5.79   13.66   1
   9  -8  -1   69.07   15.93   4
   9  -8  -1   48.71   18.06   1
  -9   8   1   35.57   17.19   2
   8  -8  -1  359.41   32.98   4
   8  -8  -1  316.22   35.87   1
  -8   8   1  256.50   32.77   2
  -7   8   1   99.60   18.86   2
   7  -8  -1   84.13   18.27   4
   7  -8  -1  109.86   21.86   1
  -6   8   1 1329.84   98.55   2
   6  -8  -1 1398.05   94.48   1
   6  -8  -1 1318.23   85.09   4
   5  -8  -1  119.90   20.99   1
   5  -8  -1  106.94   19.23   4
  -5   8   1   94.26   16.87   2
   4  -8  -1 1027.13   74.13   1
  -4   8   1  981.63   76.35   2
   4  -8  -1 1098.45   67.41   4
   3  -8  -1  262.77   29.08   1
  -3   8   1  262.97   25.36   2
  -2   8   1  235.36   24.39   2
   2  -8  -1  283.10   29.20   1
   1  -8  -1  284.74   27.93   1
   1  -8  -1  238.66   21.56   3
  -1   8   1  292.24   26.11   2
   0  -8  -1  989.96   74.82   3
   0   8   1 1110.20   76.51   2
   0  -8  -1 1043.97   74.01   1
  -1  -8  -1 1100.32   80.47   3
  -1  -8  -1 1073.77   78.48   1
   1   8   1 1175.29   81.21   2
  -2  -8  -1  126.44   21.89   1
   2   8   1  105.81   16.38   2
  -2  -8  -1  103.06   13.92   3
   3   8   1  438.57   37.54   2
  -3  -8  -1  417.16   40.86   1
  -3  -8  -1  472.34   37.49   3
   4   8   1  371.23   33.65   2
  -4  -8  -1  337.88   38.92   1
  -4  -8  -1  424.16   34.47   3
  -5  -8  -1  213.67   23.74   3
  -5  -8  -1  215.87   28.55   1
   5   8   1  216.89   24.71   2
   6   8   1   80.37   16.59   2
  -6  -8  -1   92.60   17.84   1
  -6  -8  -1   74.04   14.98   3
   7   8   1  560.96   49.47   2
  -7  -8  -1  636.88   51.77   3
   8   8   1  728.38   59.87   2
  -8  -8  -1  765.33   62.56   3
  -9  -8  -1   12.74   11.11   3
 -10  -8  -1  208.73   28.43   3
 -11  -8  -1  106.16   21.02   3
 -12  -8  -1  174.23   27.34   3
 -13  -8  -1   47.53   16.07   3
 -13   9   1  122.07   26.16   2
  13  -9  -1  156.60   31.33   1
  13  -9  -1  182.21   26.45   4
  12  -9  -1  110.80   18.96   4
 -12   9   1  114.80   24.75   2
  12  -9  -1  111.28   24.22   1
  11  -9  -1    9.34   13.04   1
  11  -9  -1   24.70   11.25   4
 -11   9   1    2.04   14.03   2
  10  -9  -1   33.27   11.86   4
  10  -9  -1   14.23   14.76   1
 -10   9   1   38.78   16.92   2
   9  -9  -1  853.90   67.04   1
  -9   9   1  839.06   69.09   2
   9  -9  -1  808.07   59.95   4
   8  -9  -1  111.54   23.14   1
  -8   9   1  107.71   21.20   2
   8  -9  -1  114.13   22.50   4
   7  -9  -1  -10.45   11.62   4
   7  -9  -1  -16.31   11.11   1
  -7   9   1    4.99   11.76   2
   6  -9  -1  293.97   33.86   1
  -6   9   1  246.72   29.20   2
   6  -9  -1  280.97   30.28   4
  -5   9   1  552.30   45.93   2
   5  -9  -1  546.58   42.77   4
   5  -9  -1  507.12   46.20   1
   4  -9  -1   42.88   15.66   1
  -4   9   1   36.32   12.87   2
  -3   9   1    5.41    8.13   2
   3  -9  -1   18.00   12.80   1
   2  -9  -1 1003.08   76.68   1
  -2   9   1 1154.83   79.92   2
   1  -9  -1  554.10   46.93   1
  -1   9   1  583.13   45.77   2
   0  -9  -1   89.13   19.15   1
   0   9   1   67.28   13.56   2
  -1  -9  -1  519.93   45.32   1
  -1  -9  -1  507.45   41.18   3
   1   9   1  548.56   43.14   2
  -2  -9  -1  122.64   23.15   1
  -2  -9  -1   95.79   14.14   3
   2   9   1  105.31   16.74   2
   3   9   1  410.76   35.19   2
  -3  -9  -1  391.64   34.41   3
  -3  -9  -1  376.09   41.63   1
  -4  -9  -1   78.59   14.41   3
   4   9   1   92.39   16.00   2
  -4  -9  -1   61.76   21.18   1
  -5  -9  -1   85.93   21.64   1
  -5  -9  -1   98.63   15.86   3
   5   9   1   72.55   15.20   2
   6   9   1  421.60   39.16   2
  -6  -9  -1  452.14   39.90   3
  -7  -9  -1  161.08   22.88   3
   7   9   1  159.89   22.16   2
   8   9   1   12.73   11.72   2
  -8  -9  -1   29.26   11.10   3
  -9  -9  -1   29.80   13.17   3
 -10  -9  -1  700.02   61.32   3
 -11  -9  -1   11.66   11.44   3
 -12  -9  -1  148.92   26.85   3
 -13  10   1   85.92   23.50   2
 -12  10   1   57.45   21.77   2
  12 -10  -1   76.42   18.83   4
  12 -10  -1   54.33   20.65   1
  11 -10  -1  444.27   49.00   1
  11 -10  -1  410.70   42.33   4
 -11  10   1  394.64   44.14   2
 -10  10   1    7.29   15.50   2
  10 -10  -1   25.70   16.76   1
  10 -10  -1   29.53   12.15   4
   9 -10  -1    7.62   13.08   1
  -9  10   1   35.46   16.03   2
   9 -10  -1   25.85   11.56   4
  -8  10   1  137.90   23.41   2
   8 -10  -1  119.86   23.53   4
   8 -10  -1  148.67   28.14   1
   7 -10  -1  406.76   39.79   4
  -7  10   1  411.75   40.28   2
   7 -10  -1  439.39   42.11   1
   6 -10  -1  315.43   37.18   1
  -6  10   1  307.36   31.86   2
   5 -10  -1   20.76   13.69   1
  -5  10   1    4.99   10.76   2
   4 -10  -1  120.97   23.22   1
  -4  10   1  101.76   18.61   2
  -3  10   1   27.69   11.06   2
   3 -10  -1   29.15   14.63   1
   2 -10  -1  435.64   41.02   1
  -2  10   1  455.14   38.83   2
   1 -10  -1   -9.80   11.07   1
  -1  10   1   -0.03    8.98   2
   0 -10  -1 1349.00   98.18   1
   0  10   1 1464.71  101.77   2
  -1 -10  -1  334.20   38.31   1
   1  10   1  368.79   32.81   2
   2  10   1   26.75   11.52   2
  -2 -10  -1   49.33   10.45   3
  -2 -10  -1   55.87   17.94   1
   3  10   1  935.67   66.21   2
  -3 -10  -1  738.12   66.88   1
  -3 -10  -1  878.94   65.53   3
  -4 -10  -1   53.27   21.35   1
   4  10   1    8.83   10.22   2
  -4 -10  -1   28.65    9.63   3
  -5 -10  -1  413.58   37.21   3
   5  10   1  394.80   37.05   2
  -6 -10  -1   28.33   11.00   3
   6  10   1   11.74   11.76   2
  -7 -10  -1  239.16   26.59   3
   7  10   1  209.49   27.09   2
  -8 -10  -1  497.31   46.03   3
  -9 -10  -1   77.62   17.81   3
 -10 -10  -1   79.70   17.91   3
 -11 -10  -1   -1.96   11.29   3
 -12 -10  -1  395.57   42.59   3
 -12  11   1   87.68   24.75   2
  11 -11  -1  -11.66   14.46   1
 -11  11   1   25.46   17.59   2
  11 -11  -1   37.37   15.86   4
 -10  11   1   -9.09   16.04   2
  10 -11  -1   21.76   15.08   4
  10 -11  -1   12.49   15.91   1
   9 -11  -1 1161.34   83.74   1
  -9  11   1  922.85   82.00   2
   9 -11  -1  983.87   73.60   4
   8 -11  -1  -11.14   14.41   1
  -8  11   1   13.61   14.02   2
  -7  11   1    1.92   12.06   2
   7 -11  -1  -13.62   13.50   1
  -6  11   1  213.33   28.09   2
   6 -11  -1  247.50   34.50   1
   5 -11  -1  211.33   31.25   1
  -5  11   1  182.09   24.83   2
  -4  11   1  109.92   19.56   2
   4 -11  -1  128.33   24.91   1
  -3  11   1   11.45   10.75   2
   3 -11  -1   11.83   13.63   1
   2 -11  -1  780.28   62.83   1
  -2  11   1  794.27   61.91   2
  -1  11   1  149.28   21.68   2
   1 -11  -1  194.25   28.68   1
   0  11   1  130.69   20.03   2
   0 -11  -1  157.86   27.10   1
   1  11   1  123.15   19.13   2
  -1 -11  -1  162.84   26.11   1
   2  11   1  128.04   18.73   2
  -2 -11  -1   99.02   23.31   1
  -3 -11  -1  393.08   45.21   1
   3  11   1  426.55   37.26   2
   4  11   1   12.98   10.42   2
  -4 -11  -1    6.87    8.04   3
   5  11   1  117.50   19.88   2
  -5 -11  -1  155.34   20.75   3
  -6 -11  -1  119.29   19.99   3
   6  11   1  148.06   21.85   2
  -7 -11  -1  112.85   20.17   3
  -8 -11  -1   23.30   13.17   3
  -9 -11  -1   34.74   14.62   3
 -10 -11  -1  301.34   34.27   3
 -11 -11  -1   13.57   12.97   3
 -11  12   1  161.13   29.30   2
 -10  12   1   59.68   20.35   2
  10 -12  -1   70.55   23.76   1
   9 -12  -1   37.88   18.80   1
  -9  12   1    4.77   16.09   2
  -8  12   1   26.89   15.54   2
   8 -12  -1   30.67   18.18   1
  -7  12   1  495.16   49.46   2
   7 -12  -1  603.38   53.46   1
   6 -12  -1   39.13   17.72   1
  -6  12   1   21.43   13.58   2
   5 -12  -1   25.71   17.10   1
  -5  12   1   38.38   13.24   2
  -4  12   1  465.10   43.55   2
   4 -12  -1  522.55   47.79   1
  -3  12   1   40.21   13.22   2
   3 -12  -1   59.09   19.77   1
   2 -12  -1  263.85   34.64   1
  -2  12   1  258.98   27.95   2
  -1  12   1    8.03   10.97   2
   1 -12  -1   -3.75   13.16   1
   0 -12  -1  250.24   34.78   1
   0  12   1  258.04   27.04   2
  -1 -12  -1  119.60   26.91   1
   1  12   1  141.57   20.40   2
   2  12   1   98.44   18.05   2
  -2 -12  -1  116.73   25.42   1
   3  12   1  319.24   30.28   2
  -3 -12  -1  270.45   38.67   1
   4  12   1   99.01   18.21   2
   5  12   1  611.10   51.73   2
  -6 -12  -1   20.97   10.33   3
   6  12   1    3.82   10.62   2
  -7 -12  -1  136.69   21.41   3
  -8 -12  -1  345.03   35.88   3
  -9 -12  -1   41.86   14.24   3
 -10 -12  -1   16.04   12.22   3
  -9  13   1  356.67   44.39   2
   9 -13  -1  469.58   51.95   1
  -8  13   1   22.35   15.21   2
   8 -13  -1   -7.97   16.08   1
   7 -13  -1    8.97   17.79   1
  -7  13   1   11.42   13.95   2
   6 -13  -1  209.87   34.56   1
  -6  13   1  195.85   28.03   2
   5 -13  -1  415.03   48.28   1
  -5  13   1  432.11   40.51   2
  -4  13   1   98.99   18.40   2
   4 -13  -1   91.26   22.21   1
   3 -13  -1   82.61   22.29   1
  -3  13   1   88.29   17.61   2
  -2  13   1  287.86   30.08   2
   2 -13  -1  273.32   37.44   1
   1 -13  -1   90.66   21.85   1
  -1  13   1  101.31   18.46   2
   0  13   1   53.77   13.78   2
   0 -13  -1   34.72   18.67   1
   1  13   1   94.07   16.95   2
  -1 -13  -1   82.55   21.63   1
  -2 -13  -1  191.40   31.75   1
   2  13   1  172.33   23.83   2
   3  13   1  283.06   30.04   2
   4  13   1    0.71   11.12   2
   5  13   1  229.39   27.86   2
  -8 -13  -1    8.59   10.39   3
  -9 -13  -1  147.63   24.04   3
   7 -14  -1  332.29   44.96   1
  -7  14   1  344.13   37.24   2
   6 -14  -1   -3.54   16.46   1
  -6  14   1   16.23   13.42   2
   5 -14  -1   10.98   16.66   1
  -5  14   1    3.97   10.40   2
  -4  14   1  214.15   27.24   2
   4 -14  -1  147.46   28.90   1
  -3  14   1  275.21   28.50   2
   3 -14  -1  181.30   32.45   1
   2 -14  -1  129.35   25.92   1
  -2  14   1  170.85   23.68   2
   1 -14  -1   28.80   18.02   1
  -1  14   1   11.10   10.71   2
   0  14   1  136.01   20.60   2
   0 -14  -1  143.10   27.41   1
   1  14   1  131.77   21.81   2
  -1 -14  -1   98.86   24.00   1
   2  14   1   27.78   12.03   2
   3  14   1   11.71   11.76   2
   4  14   1   74.96   17.34   2
   5  14   1  283.48   30.60   2
   5 -15  -1  217.08   35.37   1
   4 -15  -1   62.09   22.49   1
  -4  15   1   65.68   16.88   2
   3 -15  -1   -1.96   16.02   1
  -3  15   1    5.98   11.32   2
   2 -15  -1  209.99   35.16   1
  -2  15   1  293.67   30.15   2
   1 -15  -1   28.75   19.50   1
  -1  15   1   59.43   14.86   2
   0  15   1   35.08   13.79   2
   1  15   1   12.23   12.59   2
   2  15   1  183.91   25.45   2
   3  15   1  265.97   29.78   2
   3 -16  -1  114.49   26.95   1
   2 -16  -1   30.97   19.56   1
   1  16   1    5.72   12.16   2
   2  16   1   52.30   13.94   2
   3  16   1   31.68   13.39   2
   1  15  -2   32.60   12.84   2
  -1 -15   2   46.23   22.85   1
   0  15  -2  108.42   19.17   2
   0 -15   2   72.19   25.03   1
   1 -15   2   57.06   21.54   1
  -1  15  -2   27.51   12.64   2
   2 -15   2  111.39   24.13   1
  -2  15  -2  191.21   24.44   2
   3 -15   2   -2.03   17.05   1
  -2 -14   2   43.72   25.96   1
   2  14  -2   26.64   14.08   2
   1  14  -2  128.09   18.91   2
  -1 -14   2   39.40   24.08   1
   0  14  -2  312.17   30.28   2
   0 -14   2  255.49   39.13   1
   1 -14   2   -1.46   17.75   1
  -1  14  -2   20.72   11.82   2
  -2  14  -2   45.27   13.84   2
   2 -14   2   52.55   20.51   1
   3 -14   2   92.42   24.93   1
  -3  14  -2   92.58   18.45   2
   4 -14   2  100.02   25.54   1
  -4  14  -2  180.08   24.68   2
   5 -14   2  -17.13   16.38   1
  -5  14  -2   -0.01   12.04   2
  -6  14  -2  102.22   20.08   2
   6 -14   2   91.67   24.03   1
  -3 -13   2  263.13   40.16   1
   2  13  -2  165.07   21.92   2
  -2 -13   2  141.17   30.81   1
  -1 -13   2   22.78   19.69   1
   1  13  -2   19.63   11.52   2
   0 -13   2   75.86   22.77   1
   0  13  -2   79.01   16.32   2
  -1  13  -2   30.01   12.41   2
   1 -13   2   36.05   18.46   1
   2 -13   2  354.47   46.80   1
  -2  13  -2  461.20   38.78   2
   3 -13   2   13.14   17.72   1
  -3  13  -2   33.08   13.11   2
  -4  13  -2  111.79   18.98   2
   4 -13   2   67.99   20.81   1
  -5  13  -2  219.81   27.37   2
   5 -13   2  161.39   31.07   1
   6 -13   2    8.08   15.99   1
  -6  13  -2   13.30   12.30   2
   7 -13   2   21.58   18.68   1
  -7  13  -2    9.52   12.83   2
   8 -13   2   10.96   18.19   1
  -8  13  -2   -3.71   12.23   2
   9  12  -2   42.33   20.88   3
   8  12  -2  225.40   36.53   3
  -4 -12   2  -12.58   20.97   1
   3  12  -2   90.86   16.81   2
  -3 -12   2   83.75   27.99   1
  -2 -12   2   -3.10   19.19   1
   2  12  -2   -9.30    8.98   2
  -1 -12   2  284.04   40.04   1
   1  12  -2  320.48   29.95   2
   0 -12   2  187.44   31.70   1
   0  12  -2  161.32   21.72   2
   1 -12   2   31.46   19.25   1
  -1  12  -2   24.92   11.66   2
   2 -12   2  257.19   37.40   1
  -2  12  -2  277.97   28.59   2
  -3  12  -2   40.18   13.38   2
   3 -12   2   16.68   16.14   1
   4 -12   2  237.75   36.02   1
  -4  12  -2  302.66   29.55   2
  -5  12  -2   -2.32    9.57   2
   5 -12   2    1.60   16.19   1
  -6  12  -2   13.34   13.08   2
   6 -12   2   -0.33   15.20   1
  -7  12  -2  366.61   36.98   2
   7 -12   2  349.07   45.73   1
   8 -12   2  149.03   31.11   1
  -8  12  -2   82.01   20.58   2
   9 -12   2   49.64   18.32   1
  -9  12  -2   19.91   16.97   2
  10  11  -2  527.74   56.14   3
   9  11  -2    0.31   17.52   3
   8  11  -2   86.45   23.56   3
   7  11  -2   68.58   20.15   3
   6  11  -2  114.48   24.28   3
  -5 -11   2  437.11   52.11   1
  -4 -11   2  -21.92   21.86   1
   4  11  -2   -1.21   10.12   2
   3  11  -2  344.42   29.80   2
  -3 -11   2  231.59   38.91   1
  -2 -11   2  100.77   27.05   1
   2  11  -2  116.56   17.70   2
  -1 -11   2  118.20   26.46   1
   1  11  -2   83.63   15.63   2
   0 -11   2   48.25   19.02   1
   0  11  -2   29.73   12.18   2
  -1  11  -2   97.13   17.24   2
   1 -11   2  113.42   25.26   1
  -2  11  -2  566.37   47.67   2
   2 -11   2  581.75   52.56   1
  -3  11  -2   18.64   11.73   2
   3 -11   2   15.95   15.39   1
   4 -11   2   63.96   20.62   1
  -4  11  -2   69.10   15.85   2
  -5  11  -2  149.93   22.54   2
   5 -11   2  142.94   27.37   1
   6 -11   2  190.09   33.70   1
  -6  11  -2  249.44   27.01   2
  -7  11  -2   -0.57   11.07   2
   7 -11   2  -25.02   13.65   1
  -8  11  -2   51.13   17.36   2
   8 -11   2   91.85   21.94   1
   9 -11   2  390.76   46.62   1
  -9  11  -2  369.89   40.55   2
  10 -11   2   34.92   17.00   1
 -10  11  -2   -1.37   16.19   2
  11 -11   2   85.77   22.66   1
 -11  11  -2   35.80   18.66   2
  11  10  -2   25.17   18.69   3
  10  10  -2   33.21   19.58   3
   9  10  -2    9.21   17.76   3
   8  10  -2  260.52   38.61   3
   7  10  -2   61.64   19.76   3
  -6 -10   2    8.28   19.35   1
   6  10  -2    6.50   13.73   3
   5  10  -2  709.84   61.53   3
  -4 -10   2   39.28   23.11   1
   4  10  -2   34.44   14.58   3
   4  10  -2   43.18   12.04   2
  -3 -10   2  257.28   39.70   1
   3  10  -2  337.87   29.18   2
   2  10  -2   20.86   10.26   2
  -2 -10   2   16.73   19.62   1
   1  10  -2  235.21   24.21   2
  -1 -10   2  231.74   34.02   1
   0  10  -2  107.39   16.70   2
   0 -10   2  102.11   24.17   1
   1 -10   2    4.25   15.98   1
  -1  10  -2   22.19   10.47   2
  -2  10  -2   76.40   15.27   2
   2 -10   2   57.05   20.01   1
  -3  10  -2   18.15   11.05   2
   3 -10   2   13.16   14.61   1
  -4  10  -2  802.23   63.92   2
   4 -10   2  839.42   66.90   1
   5 -10   2   -1.09   13.28   1
  -5  10  -2   -5.45    9.57   2
   6 -10   2  157.18   29.79   1
  -6  10  -2  177.53   24.21   2
   7 -10   2  675.91   60.11   1
  -7  10  -2  709.63   58.57   2
  -8  10  -2   73.32   19.88   2
   8 -10   2   97.39   22.57   1
   9 -10   2   -0.57   10.57   1
  -9  10  -2    4.30   14.61   2
  10 -10   2    9.85   13.00   1
 -10  10  -2   57.72   18.78   2
 -11  10  -2  288.79   39.75   2
  11 -10   2  332.04   43.09   1
  12 -10   2   -0.69   13.39   1
 -12  10  -2   12.74   17.57   2
  11   9  -2   -2.10   15.94   3
  10   9  -2  410.23   47.03   3
   9   9  -2   -4.50   15.29   3
  -8  -9   2   40.22   14.52   3
   8   9  -2   56.25   19.15   3
  -7  -9   2   58.62   21.35   1
  -7  -9   2   53.10   14.55   3
  -6  -9   2  874.13   64.11   3
  -6  -9   2  680.90   64.31   1
  -5  -9   2  828.04   69.03   1
  -5  -9   2  903.03   65.22   3
   5   9  -2  699.87   60.51   2
   4   9  -2    6.69    8.28   2
  -4  -9   2   28.26   20.11   1
  -4  -9   2    0.22    7.65   3
   3   9  -2  469.36   40.19   2
   3   9  -2  569.70   44.39   3
  -3  -9   2  510.15   41.12   3
  -3  -9   2  428.48   50.42   1
  -2  -9   2  212.34   32.64   1
   2   9  -2  156.66   20.20   2
   2   9  -2  169.34   21.18   3
   1   9  -2  178.69   21.11   2
  -1  -9   2  195.32   31.20   1
   0   9  -2   26.14   10.35   2
   0  -9   2   58.56   19.79   1
  -1   9  -2  516.13   41.34   2
   1  -9   2  487.41   45.59   1
  -2   9  -2  633.54   51.94   2
   2  -9   2  701.21   56.09   1
  -3   9  -2   -3.53    8.58   2
   3  -9   2   -2.95   11.85   1
  -4   9  -2  225.78   25.76   2
   4  -9   2  258.08   33.56   1
   5  -9   2   -1.63   13.33   1
  -5   9  -2    5.02    9.97   2
   6  -9   2  597.25   52.22   1
  -6   9  -2  551.66   48.47   2
  -7   9  -2    3.51   12.21   2
   7  -9   2    1.83   10.76   1
  -8   9  -2  143.08   24.23   2
   8  -9   2  141.70   26.15   1
   9  -9   2 1279.76   93.62   1
  -9   9  -2 1204.30   95.78   2
 -10   9  -2   -6.63   13.15   2
  10  -9   2    9.10   13.12   1
 -11   9  -2   29.41   16.52   2
  11  -9   2   79.19   18.27   4
  11  -9   2   11.40   15.14   1
 -12   9  -2   30.91   16.31   2
  12  -9   2    9.75   13.21   4
  12  -9   2  -11.33   13.60   1
 -13   9  -2  263.46   38.47   2
  13  -9   2  245.90   36.27   1
  13  -9   2  282.71   34.76   4
  12   8  -2  295.43   42.48   3
  11   8  -2  156.89   31.16   3
  10   8  -2  114.25   26.80   3
   9   8  -2    1.19   13.04   3
  -9  -8   2   19.62   12.35   3
  -8  -8   2  642.33   56.61   1
  -8  -8   2  777.65   61.26   3
  -7  -8   2  117.40   20.34   3
  -7  -8   2  126.80   25.54   1
  -6  -8   2   89.70   16.28   3
  -6  -8   2   71.88   25.72   1
  -5  -8   2   68.33   25.23   1
  -5  -8   2   97.88   15.90   3
   5   8  -2   98.49   14.88   2
  -4  -8   2   66.54   23.90   1
  -4  -8   2   61.43   13.10   3
   4   8  -2   70.72   12.88   2
  -3  -8   2  476.23   46.59   1
   3   8  -2  414.37   36.74   2
  -3  -8   2  482.78   38.33   3
  -2  -8   2  161.44   29.39   1
   2   8  -2  180.13   19.61   2
  -2  -8   2  193.70   18.91   3
   1   8  -2  761.48   57.23   2
  -1  -8   2  782.54   62.51   1
   1   8  -2  759.34   58.40   3
   0   8  -2  236.25   24.18   2
   0  -8   2  279.75   33.90   1
   1  -8   2  168.18   26.26   1
  -1   8  -2  168.52   19.34   2
   2  -8   2   -8.86   10.91   1
  -2   8  -2    9.39    8.69   2
  -3   8  -2  137.10   18.37   2
   3  -8   2  135.68   23.93   1
  -4   8  -2  495.82   40.08   2
   4  -8   2  455.42   42.59   1
  -5   8  -2   36.72   12.08   2
   5  -8   2   28.82   14.46   1
  -6   8  -2  510.37   42.18   2
   6  -8   2  441.75   42.65   1
   7  -8   2  508.06   45.23   1
  -7   8  -2  483.00   44.30   2
   8  -8   2  290.08   32.78   4
   8  -8   2  300.43   36.96   1
  -8   8  -2  336.91   34.46   2
   9  -8   2   -0.04   12.05   1
  -9   8  -2   16.94   14.25   2
   9  -8   2    3.37   11.66   4
  10  -8   2   61.09   18.15   4
 -10   8  -2   57.11   18.84   2
  10  -8   2   46.50   18.28   1
 -11   8  -2  360.72   39.45   2
  11  -8   2  346.36   41.68   1
  11  -8   2  340.23   37.23   4
  12  -8   2   31.51   15.10   4
 -12   8  -2    4.33   13.97   2
  12  -8   2    9.03   15.75   1
  13  -8   2   62.14   15.69   4
  13  -8   2    9.81   14.42   1
 -13   8  -2   19.19   19.10   2
  14  -8   2  178.82   26.68   4
  14  -8   2  145.44   28.69   1
 -14   8  -2  154.31   30.45   2
  13   7  -2  291.38   42.72   3
  12   7  -2   93.45   24.60   3
  11   7  -2   39.59   19.44   3
  10   7  -2  375.44   44.20   3
 -10  -7   2  317.61   36.34   3
  -9  -7   2   58.28   16.87   3
  -8  -7   2   16.46   14.08   1
  -8  -7   2    9.98   11.29   3
  -7  -7   2   -1.80    9.07   3
  -7  -7   2   20.68   15.31   1
   6   7  -2  825.75   59.87   2
  -6  -7   2  970.85   64.74   3
  -6  -7   2  583.03   59.73   1
   5   7  -2  243.98   25.11   2
  -5  -7   2  275.32   36.11   1
  -5  -7   2  320.41   28.14   3
  -4  -7   2   25.11   17.48   1
   4   7  -2    9.79    7.15   2
  -4  -7   2   13.72    8.22   3
  -3  -7   2  611.97   44.01   3
   3   7  -2  537.69   42.13   2
  -3  -7   2  494.55   48.88   1
   2   7  -2  -11.35    5.96   2
  -2  -7   2    3.85   13.74   1
  -2  -7   2    2.74    5.48   3
  -1  -7   2  271.23   32.80   1
   1   7  -2  256.97   23.31   2
   1   7  -2  240.75   23.25   3
   0   7  -2   13.66    5.64   3
   0   7  -2    9.53    7.72   2
   0  -7   2   16.11   13.98   1
  -1   7  -2  668.68   48.94   2
   1  -7   2  619.67   51.25   1
   2  -7   2  576.05   48.24   1
  -2   7  -2  624.83   46.68   2
  -3   7  -2  162.53   19.78   2
   3  -7   2  209.59   26.26   1
   4  -7   2  280.28   30.94   1
  -4   7  -2  240.26   24.72   2
   5  -7   2  141.45   23.03   1
  -5   7  -2  159.75   20.00   2
   6  -7   2  989.47   71.46   1
  -6   7  -2  925.68   72.34   2
  -7   7  -2  -10.51   11.54   2
   7  -7   2    0.59    9.39   4
   7  -7   2   -0.79   10.47   1
  -8   7  -2  217.27   28.17   2
   8  -7   2  233.64   28.01   4
   8  -7   2  184.90   28.89   1
  -9   7  -2  854.29   69.77   2
   9  -7   2  815.98   67.22   1
   9  -7   2  920.59   62.24   4
  10  -7   2  182.06   29.37   1
 -10   7  -2  178.54   27.71   2
  10  -7   2  180.20   25.86   4
  11  -7   2   -3.09   12.40   1
  11  -7   2   -3.01   11.13   4
 -11   7  -2    5.68   13.80   2
  12  -7   2   12.16   11.46   4
  12  -7   2   18.93   14.34   1
 -12   7  -2  -12.08   12.33   2
  13  -7   2  611.63   47.90   4
  13  -7   2  548.34   51.54   1
 -13   7  -2  578.37   57.58   2
 -14   7  -2   84.87   23.78   2
  14  -7   2   79.92   21.61   1
  14  -7   2  112.90   21.30   4
  15  -7   2  130.50   19.36   4
  15  -7   2  106.75   21.87   1
 -15   7  -2   96.48   23.39   2
  13   6  -2   51.32   18.97   3
  12   6  -2   97.87   22.49   3
  11   6  -2  284.00   40.02   3
 -10  -6   2  299.49   33.62   3
  -9  -6   2   11.48   12.92   1
  -9  -6   2   -0.85   10.63   3
  -8  -6   2 1305.85   90.02   1
  -8  -6   2 1340.33  100.65   3
  -7  -6   2  259.76   30.77   1
  -7  -6   2  268.92   28.36   3
  -6  -6   2  166.05   25.94   1
  -6  -6   2  133.82   19.05   3
   6   6  -2  126.91   16.83   2
   5   6  -2   30.47    8.93   2
  -5  -6   2   55.71   19.22   1
  -5  -6   2   29.82   10.05   3
   4   6  -2  349.24   31.48   2
  -4  -6   2  394.56   38.76   1
  -4  -6   2  443.49   34.43   3
  -3  -6   2  342.80   29.57   3
   3   6  -2  365.88   29.06   2
  -3  -6   2  342.25   38.81   1
  -2  -6   2  113.31   22.56   1
  -2  -6   2   97.87   12.37   3
   2   6  -2   97.57   12.84   2
   1   6  -2 2342.12  152.02   2
  -1  -6   2 2287.54  146.17   1
  -1  -6   2 2062.90  154.80   3
   0   6  -2  114.51   13.37   3
   0   6  -2  137.35   15.15   2
   0  -6   2  157.46   23.07   1
  -1   6  -2 1279.59   85.15   2
   1  -6   2 1160.97   82.96   1
  -1   6  -2 1182.38   84.99   3
  -2   6  -2  273.94   24.62   2
   2  -6   2  286.84   28.27   1
  -3   6  -2  335.34   29.70   2
   3  -6   2  374.16   32.65   1
   4  -6   2 1450.36   95.11   1
  -4   6  -2 1341.08   98.45   2
  -5   6  -2  245.08   24.10   2
   5  -6   2  218.05   26.83   1
   6  -6   2  944.44   66.55   1
   6  -6   2  887.22   59.64   4
  -6   6  -2  854.79   67.49   2
   7  -6   2   93.90   16.96   4
   7  -6   2  103.27   20.53   1
  -7   6  -2  106.34   18.31   2
   8  -6   2  262.96   31.21   1
  -8   6  -2  231.15   28.61   2
   8  -6   2  236.78   27.42   4
  -9   6  -2   -2.21   12.36   2
   9  -6   2    7.81    9.84   4
   9  -6   2   -5.06   11.11   1
 -10   6  -2   83.81   20.70   2
  10  -6   2   91.93   21.28   1
  10  -6   2  104.49   19.78   4
  11  -6   2  960.97   64.73   4
  11  -6   2  923.33   71.23   1
 -11   6  -2  856.69   74.76   2
 -12   6  -2   64.91   21.20   2
  12  -6   2   59.08   19.78   1
  12  -6   2   42.35   14.44   4
 -13   6  -2  126.19   27.05   2
  13  -6   2  121.19   25.70   1
  13  -6   2  138.69   22.25   4
  14  -6   2  187.71   28.40   1
 -14   6  -2  132.00   27.53   2
  14  -6   2  137.21   20.57   4
  15  -6   2  254.95   30.94   4
 -15   6  -2  203.09   35.81   2
  15  -6   2  237.22   35.76   1
  14   5  -2   48.50   18.72   3
  13   5  -2  235.23   34.93   3
  12   5  -2   53.04   16.91   3
  11   5  -2   34.73   15.84   3
 -10  -5   2  373.75   31.75   1
 -10  -5   2  326.34   36.75   3
  -9  -5   2  190.50   25.81   3
  -9  -5   2  207.87   24.08   1
  -8  -5   2   61.94   15.75   3
  -8  -5   2  103.46   17.14   1
  -7  -5   2   15.23    9.57   3
   7   5  -2   44.76    9.78   2
  -7  -5   2   35.40   13.53   1
  -6  -5   2 1206.19   88.20   3
   6   5  -2 1132.18   83.39   2
  -6  -5   2 1198.45   80.97   1
  -5  -5   2    1.95   12.96   1
   5   5  -2    6.10    6.08   2
  -5  -5   2    1.89    6.64   3
  -4  -5   2  -26.15   12.37   1
   4   5  -2    4.10    5.61   2
  -4  -5   2   -1.44    5.91   3
  -3  -5   2  220.16   28.35   1
  -3  -5   2  237.79   20.95   3
   3   5  -2  197.72   19.24   2
  -2  -5   2  519.09   38.91   3
   2   5  -2  456.96   37.51   2
  -2  -5   2  542.74   44.53   1
  -1  -5   2  976.78   74.81   3
   1   5  -2 1033.53   73.68   2
  -1  -5   2 1155.34   75.66   1
   0   5  -2  115.95   12.76   3
   0   5  -2  124.05   13.82   2
   0  -5   2  146.42   20.99   1
  -1   5  -2 1361.60  101.42   3
  -1   5  -2 1487.30  100.54   2
   1  -5   2 1522.23   97.15   1
  -2   5  -2  669.79   48.05   2
   2  -5   2  629.19   48.31   1
   3  -5   2  259.09   26.77   1
  -3   5  -2  316.51   25.42   2
  -4   5  -2  354.49   30.24   2
   4  -5   2  360.06   31.72   1
   5  -5   2  161.54   19.41   4
  -5   5  -2  172.38   18.56   2
   5  -5   2  143.53   20.54   1
  -6   5  -2 1731.19  123.05   2
   6  -5   2 1727.13  104.03   4
   6  -5   2 1794.87  115.77   1
   7  -5   2   48.96   14.42   1
  -7   5  -2   24.23   12.53   2
   7  -5   2   44.28   13.41   4
  -8   5  -2  232.43   27.11   2
   8  -5   2  241.59   28.92   1
   8  -5   2  217.16   25.12   4
   9  -5   2  404.84   37.04   1
   9  -5   2  330.71   31.09   4
  -9   5  -2  367.86   36.73   2
  10  -5   2  353.96   36.92   1
  10  -5   2  325.34   31.51   4
 -10   5  -2  300.08   34.51   2
  11  -5   2   20.82   15.07   1
  11  -5   2   12.51    9.55   4
 -11   5  -2  -15.61   11.92   2
 -12   5  -2   42.57   18.07   2
  12  -5   2   47.49   18.43   1
  12  -5   2   77.88   16.49   4
 -13   5  -2  684.17   65.21   2
  13  -5   2  759.10   54.61   4
  13  -5   2  791.83   62.46   1
  14  -5   2   24.82   16.28   1
 -14   5  -2   13.47   15.87   2
  14  -5   2   11.73   11.99   4
  15  -5   2   14.26   15.07   1
  15  -5   2    0.64   10.91   4
 -15   5  -2  -12.28   14.87   2
  14   4  -2   31.02   15.84   3
  13   4  -2   -8.47   12.32   3
  12   4  -2   21.25   14.70   3
 -11  -4   2  461.95   38.46   1
  11   4  -2  519.18   49.38   3
 -10  -4   2  225.47   24.83   1
 -10  -4   2  225.89   29.04   3
  -9  -4   2  116.62   20.11   3
  -9  -4   2   89.96   16.22   1
  -8  -4   2 1046.58   84.39   3
  -8  -4   2 1169.59   74.76   1
  -7  -4   2    6.73    9.40   1
   7   4  -2    1.71    6.32   2
  -7  -4   2   -0.82    8.07   3
   6   4  -2  157.27   16.88   2
  -6  -4   2  166.23   19.27   3
  -6  -4   2  184.75   21.32   1
  -5  -4   2  200.75   20.24   3
  -5  -4   2  195.20   22.80   1
   5   4  -2  154.13   16.87   2
  -4  -4   2  801.36   60.76   1
   4   4  -2  765.40   60.21   2
  -4  -4   2  996.84   64.49   3
   3   4  -2  476.90   38.53   2
  -3  -4   2  503.83   43.15   1
  -3  -4   2  604.98   41.40   3
  -2  -4   2    8.27    5.29   3
   2   4  -2   17.18    5.70   2
  -2  -4   2    9.72   13.35   1
   1   4  -2 1064.35   75.35   2
  -1  -4   2 1108.01   75.57   1
  -1  -4   2 1109.99   77.34   3
   0  -4   2  794.70   54.78   1
   0   4  -2  742.31   54.20   3
   0   4  -2  723.85   53.12   2
  -1   4  -2  685.39   51.00   3
  -1   4  -2  660.92   50.78   2
   1  -4   2  800.24   52.26   1
   2  -4   2   15.10    9.06   1
  -2   4  -2    8.06    6.02   2
  -3   4  -2 1067.43   73.55   2
   3  -4   2 1009.85   70.06   1
   4  -4   2 2946.98  187.58   1
   4  -4   2 3011.76  168.37   4
  -4   4  -2 3070.20  203.69   2
   5  -4   2   87.18   15.65   1
   5  -4   2   86.10   14.24   4
  -5   4  -2   76.88   13.06   2
  -6   4  -2  247.43   24.73   2
   6  -4   2  253.14   24.06   4
   6  -4   2  262.46   25.75   1
  -7   4  -2    2.95    8.21   2
   7  -4   2    2.17    7.71   4
   7  -4   2    1.89    9.80   1
   8  -4   2  530.51   42.60   1
  -8   4  -2  449.87   42.37   2
   8  -4   2  516.54   38.15   4
  -9   4  -2   -6.87   10.24   2
   9  -4   2   -4.65   11.41   1
   9  -4   2    1.74    8.53   4
 -10   4  -2  507.01   45.74   2
  10  -4   2  504.72   43.30   1
  10  -4   2  487.60   38.23   4
 -11   4  -2  672.76   59.03   2
  11  -4   2  691.29   55.23   1
  11  -4   2  711.44   49.49   4
 -12   4  -2  114.91   23.50   2
  12  -4   2  113.89   18.41   4
  12  -4   2  108.09   22.06   1
 -13   4  -2   43.27   18.97   2
  13  -4   2   64.96   19.88   1
  13  -4   2   60.19   14.10   4
  14  -4   2   55.46   14.31   4
 -14   4  -2   49.16   17.86   2
  14  -4   2   79.37   20.40   1
  15  -4   2  600.74   53.08   1
  15  -4   2  566.87   45.14   4
  15   3  -2   20.95   14.54   3
  14   3  -2   30.26   13.84   3
  13   3  -2  667.77   61.57   3
  12   3  -2   21.23   13.13   3
 -12  -3   2   11.49   10.07   1
 -11  -3   2  167.59   21.40   1
  11   3  -2  185.42   28.06   3
 -10  -3   2   62.80   17.54   3
  10   3  -2   71.91   18.47   3
 -10  -3   2  110.76   16.90   1
  -9  -3   2  537.59   45.88   3
  -9  -3   2  490.33   38.40   1
   8   3  -2  101.30   13.96   2
  -8  -3   2  101.95   17.32   3
  -8  -3   2  115.51   16.11   1
  -7  -3   2   -3.54    6.68   3
  -7  -3   2    3.31    7.64   1
   7   3  -2    6.96    6.87   2
   6   3  -2 1209.39   89.49   2
  -6  -3   2 1356.54   84.14   1
  -6  -3   2 1306.41   94.61   3
  -5  -3   2    3.98    6.23   3
   5   3  -2    1.70    4.67   2
  -5  -3   2    9.97    8.75   1
  -4  -3   2  112.79   13.61   3
   4   3  -2   90.51   11.32   2
  -4  -3   2  124.61   17.36   1
  -3  -3   2   88.87   10.91   3
  -3  -3   2  101.79   16.65   1
   3   3  -2   58.80    9.11   2
   2   3  -2 1388.60   91.59   2
  -2  -3   2 1307.89   89.02   1
   1   3  -2 1657.03  115.70   2
  -1  -3   2 1878.96  111.89   1
   1   3  -2 1627.23  119.94   3
   0  -3   2   22.33   10.19   1
   0   3  -2   10.32    4.56   2
   0   3  -2    8.73    4.36   3
   1  -3   2 2157.60  135.51   1
  -1   3  -2 2112.65  148.81   3
  -1   3  -2 2211.95  145.32   2
   2  -3   2  525.65   38.57   1
  -2   3  -2  542.93   39.07   2
  -3   3  -2 1207.37   83.27   2
   3  -3   2 1211.63   78.39   1
   3  -3   2 1181.13   70.28   4
   4  -3   2  163.66   18.42   1
   4  -3   2  178.44   17.14   4
  -4   3  -2  153.11   16.94   2
  -5   3  -2 1379.47   96.59   2
  -5   3  -2 1254.61   95.58   3
   5  -3   2 1431.13   90.40   1
   5  -3   2 1445.09   81.46   4
   6  -3   2 1310.90   80.60   4
  -6   3  -2 1334.59   95.51   3
   6  -3   2 1440.88   90.56   1
  -6   3  -2 1365.83   96.50   2
  -7   3  -2   14.25    9.52   2
   7  -3   2   26.29   10.61   1
   7  -3   2   17.43    8.48   4
  -7   3  -2   20.90    6.03   3
  -8   3  -2  466.66   41.14   2
   8  -3   2  471.25   35.38   4
  -8   3  -2  469.19   37.81   3
   8  -3   2  526.58   40.02   1
   9  -3   2  132.66   19.86   1
  -9   3  -2  123.28   20.42   2
   9  -3   2  115.73   17.83   4
  10  -3   2  307.31   26.92   4
 -10   3  -2  289.29   32.18   2
  10  -3   2  310.26   30.09   1
 -11   3  -2   23.08   13.97   2
  11  -3   2   13.18   10.81   1
  11  -3   2   20.65    9.68   4
  12  -3   2  172.70   24.08   1
  12  -3   2  161.90   20.42   4
 -12   3  -2  141.62   25.17   2
  13  -3   2  665.25   48.75   4
 -13   3  -2  662.96   59.43   2
  13  -3   2  712.61   55.32   1
  14  -3   2   27.23    9.86   4
 -14   3  -2   36.81   15.64   2
  14  -3   2   34.12   13.66   1
  15   2  -2  393.70   42.64   3
  14   2  -2  162.01   27.77   3
  13   2  -2    8.82   10.96   3
  12   2  -2    8.58   12.57   3
 -12  -2   2   32.58   11.27   1
 -11  -2   2 1002.38   67.50   1
  11   2  -2  970.60   81.13   3
 -10  -2   2  192.68   21.87   1
  10   2  -2  179.05   27.06   3
 -10  -2   2  230.63   27.01   3
  -9  -2   2  138.34   16.75   1
  -9  -2   2  113.17   19.42   3
   8   2  -2  567.71   43.83   2
  -8  -2   2  580.82   40.66   1
  -8  -2   2  548.65   47.10   3
  -7  -2   2  433.40   36.74   3
   7   2  -2  423.14   33.73   2
  -7  -2   2  429.56   32.00   1
  -6  -2   2  122.67   15.86   3
   6   2  -2  116.68   13.03   2
  -6  -2   2  134.60   15.08   1
   5   2  -2   53.79    8.28   2
  -5  -2   2   57.14   10.65   3
  -5  -2   2   76.48   11.71   1
  -4  -2   2 6581.65  391.38   1
  -4  -2   2 6550.13  443.99   3
   4   2  -2 6311.37  429.33   2
  -3  -2   2  759.98   50.63   1
  -3  -2   2  724.63   54.07   3
  -2  -2   2   24.25    5.40   3
  -2  -2   2   17.57    9.95   1
   2   2  -2   10.97    3.99   2
   2   2  -2   19.51    6.17   3
  -1  -2   2  737.15   48.91   1
   1   2  -2  620.77   46.58   2
   1   2  -2  687.52   49.38   3
   0   2  -2  280.22   22.53   3
   0  -2   2  276.50   24.48   1
   0   2  -2  309.16   21.51   2
   1  -2   2 1171.73   70.38   1
  -1   2  -2 1062.93   73.56   2
  -1   2  -2 1009.08   75.84   3
   2  -2   2    0.25    5.76   1
  -2   2  -2   -0.24    4.33   2
  -2   2  -2   -0.19    2.15   3
   3  -2   2 3609.37  223.68   1
  -3   2  -2 3928.77  245.38   2
  -3   2  -2 3478.05  250.52   3
   3  -2   2 3665.66  200.54   4
   4  -2   2  893.21   56.90   1
   4  -2   2  856.09   51.03   4
  -4   2  -2  787.88   59.57   3
  -4   2  -2  849.35   60.27   2
  -5   2  -2  431.48   35.26   3
  -5   2  -2  500.15   37.22   2
   5  -2   2  474.90   35.37   1
   5  -2   2  497.42   32.32   4
   6  -2   2  184.08   18.06   4
  -6   2  -2  190.68   20.07   2
  -6   2  -2  182.96   17.26   3
   6  -2   2  200.93   19.82   1
  -7   2  -2   15.05    8.85   2
   7  -2   2    7.15    7.91   1
  -7   2  -2    1.70    4.80   3
   7  -2   2   14.59    7.52   4
   8  -2   2 2369.29  131.72   4
   8  -2   2 2349.96  146.30   1
  -8   2  -2 2190.07  159.44   2
  -8   2  -2 2287.75  161.48   3
   9  -2   2   37.16   12.49   1
   9  -2   2   44.18   11.65   4
  -9   2  -2   25.81    8.72   3
  -9   2  -2   50.04   14.19   2
 -10   2  -2  368.22   31.63   3
 -10   2  -2  307.98   33.67   2
  10  -2   2  347.69   31.89   1
  10  -2   2  359.45   28.97   4
  11  -2   2  675.17   50.29   1
 -11   2  -2  563.57   52.91   2
  11  -2   2  660.53   45.49   4
 -12   2  -2  141.35   22.98   2
  12  -2   2  108.33   18.02   4
  12  -2   2  141.72   22.34   1
  13  -2   2    5.30   11.79   1
 -13   2  -2   -0.28   11.40   2
  13  -2   2   12.34   10.01   4
 -14   2  -2   14.13   13.55   2
  16   1  -2  196.97   29.71   3
  15   1  -2   22.09   14.90   3
  14   1  -2  100.56   20.28   3
  13   1  -2 1368.79  104.51   3
 -13  -1   2 1237.13   86.48   1
  12   1  -2   26.77   12.90   3
 -12  -1   2    8.27    9.95   1
  11   1  -2   19.10   12.66   3
 -11  -1   2   15.89    9.78   1
  10   1  -2  382.66   37.06   3
 -10  -1   2  337.81   29.58   1
   9   1  -2  794.73   58.51   2
  -9  -1   2  733.54   60.83   3
   9   1  -2  789.60   62.86   3
  -9  -1   2  728.78   52.10   1
  -8  -1   2  147.17   16.64   1
  -8  -1   2  152.15   19.42   3
   8   1  -2  137.64   17.08   2
  -7  -1   2  102.13   14.60   3
   7   1  -2   71.08   11.29   2
  -7  -1   2   76.48   12.02   1
   6   1  -2  967.99   67.69   2
  -6  -1   2  967.77   62.16   1
  -6  -1   2  928.97   70.67   3
  -5  -1   2  340.55   28.39   3
   5   1  -2  343.87   26.47   2
  -5  -1   2  325.13   25.28   1
  -4  -1   2  421.31   34.23   3
   4   1  -2  457.71   32.13   2
  -4  -1   2  446.21   30.98   1
  -3  -1   2  169.48   15.33   1
   3   1  -2  152.83   13.40   2
   3   1  -2  162.91   16.30   3
  -3  -1   2  193.19   16.03   3
  -2  -1   2 1573.83   91.86   1
   2   1  -2 1359.32  102.57   3
   1   1  -2 1871.90  120.96   2
  -1  -1   2 1769.96  112.97   1
   0   1  -2   86.93    8.16   2
   0   1  -2  102.83   10.48   3
   0  -1   2  104.89   12.54   1
  -1   1  -2 2274.31  149.38   2
  -1   1  -2 2233.96  154.33   3
   1  -1   2 2216.59  137.28   1
  -2   1  -2   19.21    4.76   2
   2  -1   2   12.94    4.91   4
  -2   1  -2    9.76    3.45   3
   2  -1   2   11.08    5.54   1
   3  -1   2  190.08   15.15   4
   3  -1   2  210.39   17.26   1
  -3   1  -2  159.03   15.60   3
  -3   1  -2  208.43   16.99   2
   4  -1   2  182.03   15.78   1
  -4   1  -2  145.58   14.12   3
   4  -1   2  153.45   13.94   4
  -4   1  -2  144.62   15.31   2
  -5   1  -2  413.48   34.89   3
   5  -1   2  484.35   33.81   1
   5  -1   2  474.12   30.56   4
  -5   1  -2  482.35   36.27   2
  -6   1  -2 1121.25   81.53   2
  -6   1  -2 1241.66   72.48   1
  -6   1  -2 1078.18   81.92   3
  -7   1  -2   75.42    9.66   1
  -7   1  -2   61.89   10.76   3
  -7   1  -2   55.32   12.30   2
  -8   1  -2  893.95   67.86   3
  -8   1  -2  842.88   67.14   2
  -8   1  -2  977.83   59.36   1
  -9   1  -2    0.40    5.60   1
  -9   1  -2   17.53    8.88   3
  -9   1  -2    8.32    8.72   2
 -10   1  -2  441.84   33.39   1
 -10   1  -2  484.94   39.88   3
 -10   1  -2  435.41   40.06   2
 -11   1  -2    6.43    8.36   1
 -11   1  -2   -4.36    8.43   3
 -11   1  -2  -11.78    8.67   2
 -12   1  -2   79.41   14.20   1
 -12   1  -2  108.65   20.56   2
 -12   1  -2   92.49   17.59   3
  13  -1   2  546.59   40.62   4
  13  -1   2  561.39   46.42   1
 -13   1  -2  548.18   50.04   2
  15   0  -2   73.26   18.33   3
 -14   0   2  162.26   21.43   1
  14   0  -2  172.06   27.85   3
  13   0  -2    1.93   11.74   3
 -13   0   2   19.22   10.35   1
  12   0  -2   23.64   12.13   3
 -12   0   2    8.81    9.17   1
 -11   0   2 1228.05   84.97   1
  11   0  -2 1365.39  100.93   3
  10   0  -2   81.27   17.20   3
 -10   0   2   59.23   13.60   1
  -9   0   2   88.97   12.77   2
   9   0  -2   71.23   16.58   3
  -9   0   2  109.81   14.48   1
  -8   0   2   94.40   11.66   2
   8   0  -2   78.80   16.95   3
  -8   0   2   98.28   13.51   1
  -7   0   2 1339.29   87.13   1
   7   0  -2 1355.23  100.90   3
  -7   0   2 1422.79   94.67   2
  -6   0   2  489.20   35.15   2
   6   0  -2  485.32   39.78   3
  -6   0   2  457.68   33.54   1
  -5   0   2   70.53    9.56   1
  -5   0   2   57.90    7.58   2
   5   0  -2   65.77   11.40   3
   4   0  -2 6162.89  430.45   3
  -4   0   2 6399.84  377.72   1
   3   0  -2  345.96   27.83   3
  -3   0   2  341.18   24.23   1
  -3   0   2  349.94   24.28   2
   2   0  -2   11.18    5.14   3
  -2   0   2   17.98    5.16   1
  -1   0   2 1052.75   68.83   1
   1   0  -2 1182.70   78.60   3
   0   0  -2 1441.24   95.88   2
  -1   0  -2 2255.76  157.12   3
   1   0   2 2325.81  138.88   1
   2   0   2 1357.48   83.35   4
  -2   0  -2 1582.71  102.92   2
  -2   0  -2 1538.21  105.63   3
   2   0   2 1632.42   93.40   1
   3   0   2 1850.13  109.60   4
  -3   0  -2 1936.15  138.74   3
   3   0   2 2195.47  122.76   1
  -3   0  -2 2053.23  135.29   2
  -4   0  -2  282.90   20.13   1
  -4   0  -2  295.50   24.14   3
  -4   0  -2  311.83   24.11   2
  -5   0  -2  573.97   36.06   1
  -5   0  -2  574.68   42.13   3
  -5   0  -2  509.22   40.97   2
  -6   0  -2  285.35   21.68   1
  -6   0  -2  309.27   26.09   3
  -6   0  -2  303.42   25.82   2
  -7   0  -2 1406.12   86.23   1
  -7   0  -2 1363.97   96.86   2
  -7   0  -2 1368.23   99.41   3
  -8   0  -2 3081.79  214.44   3
  -8   0  -2 3001.01  208.15   2
  -8   0  -2 3097.08  186.78   1
  -9   0  -2    3.02    8.48   3
  -9   0  -2   16.41    6.62   1
  -9   0  -2    1.75    8.07   2
 -10   0  -2  314.52   30.18   3
 -10   0  -2  266.46   29.32   2
 -10   0  -2  319.58   24.40   1
 -11   0  -2  309.47   25.26   1
 -11   0  -2  283.88   30.39   2
 -11   0  -2  286.11   30.82   3
 -12   0  -2  194.13   19.58   1
 -12   0  -2  196.91   26.11   2
 -12   0  -2  200.73   25.68   3
 -13   0  -2   52.04   15.23   3
  13   0   2   37.69   19.00   2
 -14   0  -2  204.57   28.86   3
  14  -1  -2  184.38   28.26   3
 -14   1   2  229.92   25.01   1
 -13   1   2  594.83   45.55   1
  13  -1  -2  608.98   54.32   3
  12  -1  -2  175.66   25.09   3
 -12   1   2  158.39   20.69   1
  11  -1  -2    2.01    8.75   3
 -11   1   2    3.32    9.02   1
 -10   1   2  214.27   21.83   2
 -10   1   2  214.39   21.35   1
  10  -1  -2  221.66   24.99   3
  -9   1   2 1391.50   97.61   1
  -9   1   2 1615.04  107.56   2
   9  -1  -2 1596.24  114.00   3
  -8   1   2  226.21   21.32   2
  -8   1   2  225.75   20.68   1
   8  -1  -2  248.76   25.56   3
  -7   1   2   41.55    9.48   1
   7  -1  -2   56.86   12.08   3
  -7   1   2   47.40    9.13   2
  -6   1   2 1212.00   75.40   1
   6  -1  -2 1155.57   86.15   3
  -6   1   2 1173.34   81.95   2
   5  -1  -2    7.61    6.29   3
  -5   1   2    6.41    5.26   2
  -5   1   2    1.52    5.23   1
  -4   1   2   57.75    6.83   2
   4  -1  -2   46.52    8.63   3
  -4   1   2   49.89    7.81   1
   3  -1  -2  287.72   23.18   3
  -3   1   2  258.05   19.85   1
  -3   1   2  289.41   20.65   2
   2  -1  -2 2532.32  167.68   3
  -2   1   2 2362.50  161.08   2
  -2   1   2 2383.32  146.76   1
  -1   1   2  521.57   34.52   1
  -1   1   2  524.47   37.53   2
   1  -1  -2  608.32   40.90   3
   0  -1  -2  184.50   14.25   3
   0   1   2  157.71   11.05   1
   0   1   2  160.50   12.67   2
  -1  -1  -2 1833.07  130.20   3
   1   1   2 1953.94  126.97   2
  -2  -1  -2  246.87   17.02   1
  -2  -1  -2  275.06   21.40   3
   2   1   2  300.91   22.28   2
  -3  -1  -2  381.41   29.37   3
  -3  -1  -2  369.46   23.97   1
  -3  -1  -2  395.28   28.15   2
   3   1   2  365.89   29.85   2
  -4  -1  -2  844.55   49.87   1
  -4  -1  -2  814.22   56.58   2
  -4  -1  -2  750.28   58.22   3
  -5  -1  -2 1261.66   73.61   1
  -5  -1  -2 1144.28   85.40   3
  -5  -1  -2 1167.93   82.71   2
  -6  -1  -2 1314.42   91.79   2
  -6  -1  -2 1316.78   81.52   1
  -7  -1  -2  224.53   17.94   1
  -7  -1  -2  226.95   22.42   3
  -7  -1  -2  228.04   21.75   2
  -8  -1  -2  322.03   30.26   3
  -8  -1  -2  315.17   24.10   1
  -8  -1  -2  343.01   29.18   2
  -9  -1  -2   14.14    5.69   1
   9   1   2    9.78   11.54   2
  -9  -1  -2    8.94    9.34   3
  10   1   2  814.06   68.12   2
 -10  -1  -2  816.23   55.00   1
 -10  -1  -2  859.21   66.37   3
  11   1   2   83.40   19.53   2
 -11  -1  -2   82.60   17.41   3
 -11  -1  -2   72.98   11.69   1
 -12  -1  -2  313.58   31.83   3
  12   1   2  260.11   35.03   2
 -13  -1  -2  359.64   38.00   3
 -14  -1  -2   19.97   14.26   3
 -15  -1  -2   -1.96   12.45   3
 -15   2   2    9.01   12.04   1
 -14   2   2  263.34   26.45   1
 -13   2   2   28.27   11.54   1
 -12   2   2  120.33   18.06   1
  12  -2  -2  102.50   19.18   3
  11  -2  -2  940.51   73.52   3
 -11   2   2  897.01   63.01   1
 -10   2   2   11.95    9.34   2
  10  -2  -2   11.61   10.42   3
 -10   2   2   11.77    9.46   1
   9  -2  -2    7.30    8.45   3
  -9   2   2   10.08    8.73   1
  -9   2   2   -7.27    7.28   2
   8  -2  -2  399.30   34.70   3
  -8   2   2  373.41   32.36   2
  -8   2   2  388.75   29.79   1
   7  -2  -2 2249.76  156.62   3
  -7   2   2 2128.43  150.77   2
  -7   2   2 2249.67  137.19   1
  -6   2   2  305.55   23.51   1
  -6   2   2  292.49   25.07   2
   6  -2  -2  313.53   26.99   3
  -5   2   2    8.34    5.19   2
  -5   2   2   -3.60    4.68   1
   5  -2  -2    8.00    5.80   3
  -4   2   2 2251.18  148.49   2
   4  -2  -2 2206.54  153.68   3
  -4   2   2 2158.14  134.94   1
  -3   2   2    9.49    4.61   2
  -3   2   2   -0.19    3.89   1
   3  -2  -2    9.84    5.46   3
  -2   2   2   15.79    4.71   2
   2  -2  -2   22.95    6.55   3
  -2   2   2   16.63    4.52   1
  -1   2   2  324.73   20.74   1
  -1   2   2  302.36   23.10   2
   0  -2  -2 5493.52  353.47   3
   0   2   2 5219.15  309.83   1
   0   2   2 4829.17  343.17   2
  -1  -2  -2 1573.95  112.91   3
  -1  -2  -2 1614.55   98.81   1
   1   2   2 1710.94  110.47   2
   2   2   2   85.28   10.22   2
  -2  -2  -2   93.06   10.04   3
   3   2   2  652.29   48.32   2
  -3  -2  -2  655.44   48.95   3
  -3  -2  -2  688.33   40.97   1
  -4  -2  -2  150.44   15.57   3
   4   2   2  139.49   15.64   2
  -4  -2  -2  133.93   10.77   1
  -5  -2  -2   23.40    4.75   1
  -5  -2  -2   31.00    8.34   3
   5   2   2   23.33    8.91   2
  -6  -2  -2  276.43   26.74   3
  -6  -2  -2  315.29   21.44   1
   6   2   2  312.20   28.29   2
   7   2   2  816.85   63.47   2
  -7  -2  -2  819.75   63.39   3
  -7  -2  -2  855.43   53.24   1
   8   2   2  644.87   54.82   2
  -8  -2  -2  701.18   45.23   1
  -8  -2  -2  712.08   55.06   3
  -9  -2  -2   99.06   17.69   3
   9   2   2  114.79   20.36   2
  -9  -2  -2  131.15   13.05   1
 -10  -2  -2  318.88   32.47   3
 -10  -2  -2  303.55   24.19   1
  10   2   2  319.60   34.07   2
  11   2   2   26.80   14.52   2
 -11  -2  -2   10.40   10.63   3
  12   2   2  471.86   46.26   2
 -12  -2  -2  501.21   46.07   3
 -13  -2  -2   92.14   20.27   3
 -14  -2  -2  195.28   28.84   3
 -15  -2  -2  468.31   47.90   3
 -16  -2  -2    5.71   15.47   3
  16   2   2   31.82   16.12   3
 -15   3   2   34.55   12.57   1
 -14   3   2  117.63   19.59   1
 -13   3   2   82.90   16.01   1
 -12   3   2  120.19   18.78   1
 -11   3   2    7.13   10.13   1
 -11   3   2    2.58    9.01   2
  11  -3  -2   -0.64    8.14   3
  10  -3  -2  102.90   18.26   3
 -10   3   2  100.37   16.34   1
 -10   3   2  113.23   17.72   2
   9  -3  -2 2865.79  196.66   3
  -9   3   2 2897.14  172.35   1
  -9   3   2 2545.52  189.97   2
  -8   3   2    4.23    7.68   1
   8  -3  -2    0.63    7.49   3
  -8   3   2    5.12    7.30   2
  -7   3   2  297.54   27.55   2
  -7   3   2  342.53   25.67   1
   7  -3  -2  309.59   28.56   3
  -6   3   2  629.99   41.29   1
  -6   3   2  577.44   44.85   2
   6  -3  -2  581.67   46.20   3
  -5   3   2  292.61   23.18   1
   5  -3  -2  294.33   25.70   3
  -5   3   2  313.74   25.46   2
  -4   3   2  611.06   41.31   1
  -4   3   2  639.65   45.49   2
   4  -3  -2  621.10   46.73   3
   3  -3  -2   73.18   10.25   3
  -3   3   2   85.70   10.00   2
  -3   3   2   79.18    8.93   1
  -2   3   2 4578.11  279.12   1
   2  -3  -2 4969.42  318.35   3
  -2   3   2 4384.95  308.55   2
   1  -3  -2   10.36    4.42   3
   1  -3  -2   14.85    5.85   1
   1  -3  -2   15.07    5.10   4
  -1   3   2   14.31    5.07   2
   0  -3  -2   21.58    4.97   3
   0  -3  -2   16.87    4.95   4
   0  -3  -2   21.50    5.72   1
   0   3   2   29.23    6.11   2
  -1  -3  -2 2026.18  128.21   1
   1   3   2 2126.82  142.10   2
  -1  -3  -2 2163.70  145.50   3
   2   3   2 2514.06  166.93   2
  -2  -3  -2 2210.72  150.41   1
  -2  -3  -2 2697.22  171.40   3
  -3  -3  -2 1618.20   95.86   1
   3   3   2 1497.10  107.50   2
  -3  -3  -2 1580.52  110.35   3
   4   3   2  117.67   14.47   2
  -4  -3  -2  124.55   14.27   3
  -4  -3  -2  134.35   10.58   1
  -5  -3  -2 3261.10  190.48   1
   5   3   2 3148.62  213.90   2
  -5  -3  -2 3052.92  219.35   3
  -6  -3  -2 1133.99   71.01   1
  -6  -3  -2 1149.53   84.08   3
   6   3   2 1140.17   82.62   2
  -7  -3  -2  624.53   39.66   1
   7   3   2  578.04   48.05   2
  -7  -3  -2  604.27   48.43   3
   8   3   2  103.71   17.67   2
  -8  -3  -2   84.76   15.45   3
  -8  -3  -2  116.76   10.83   1
  -9  -3  -2  163.77   14.65   1
   9   3   2  160.23   22.49   2
  -9  -3  -2  157.95   21.76   3
 -10  -3  -2 1075.83   83.39   3
  10   3   2 1062.02   82.50   2
  11   3   2   29.62   13.91   2
 -11  -3  -2   32.78   13.19   3
 -12  -3  -2  462.41   44.54   3
 -13  -3  -2  216.73   29.95   3
 -14  -3  -2  282.71   35.68   3
 -15  -3  -2    4.86   13.71   3
 -16  -3  -2   13.74   15.36   3
  16  -4  -2   55.82   14.30   4
  16  -4  -2   12.96   15.06   1
  15  -4  -2    1.25    9.03   4
  15  -4  -2   -9.64   12.43   1
 -14   4   2  395.78   34.39   1
 -13   4   2   -4.52    9.95   1
 -12   4   2  248.67   25.24   1
 -11   4   2  556.86   47.66   2
 -11   4   2  543.68   41.88   1
 -10   4   2   60.41   13.11   1
 -10   4   2   35.06   12.97   2
  -9   4   2   24.03   10.14   1
  -9   4   2   26.00   10.87   2
   9  -4  -2   33.42   10.38   3
  -8   4   2    5.06    7.66   2
  -8   4   2    4.83    8.17   1
   8  -4  -2   12.21    8.24   3
  -7   4   2 1896.70  132.51   2
   7  -4  -2 1852.52  135.12   3
  -7   4   2 1961.74  119.79   1
  -6   4   2  281.46   24.37   2
   6  -4  -2  262.03   23.74   3
  -6   4   2  233.88   21.11   1
  -5   4   2    8.98    6.20   1
  -5   4   2    5.45    7.19   2
   5  -4  -2   11.33    7.25   3
  -4   4   2 3191.89  197.20   2
  -4   4   2 2819.79  177.77   1
   4  -4  -2 2736.45  201.86   3
  -3   4   2  148.68   15.12   2
   3  -4  -2  144.38   16.01   1
   3  -4  -2  152.87   14.93   3
   3  -4  -2  148.66   14.42   4
   2  -4  -2  729.91   41.62   4
  -2   4   2  675.35   48.88   2
   2  -4  -2  643.35   48.31   3
   2  -4  -2  667.89   45.65   1
   1  -4  -2  264.95   21.54   3
   1  -4  -2  291.36   20.11   4
   1  -4  -2  291.17   22.27   1
  -1   4   2  275.48   22.85   2
   0  -4  -2 3852.42  203.09   4
   0  -4  -2 3824.39  226.80   1
   0  -4  -2 3546.45  255.84   3
   0   4   2 3726.18  250.09   2
  -1  -4  -2   58.74    8.41   3
  -1  -4  -2   62.81    9.57   1
   1   4   2   62.46    9.66   2
   2   4   2   11.70    6.05   2
  -2  -4  -2   20.08    6.30   3
  -2  -4  -2   11.33    7.65   1
   3   4   2 1394.50   94.73   2
  -3  -4  -2 1320.91   96.62   3
  -4  -4  -2  455.77   30.97   1
   4   4   2  457.40   35.89   2
  -4  -4  -2  419.62   35.97   3
  -5  -4  -2  814.30   51.94   1
   5   4   2  822.56   60.40   2
  -5  -4  -2  798.51   61.28   3
  -6  -4  -2  135.71   11.88   1
  -6  -4  -2  147.33   17.40   3
   6   4   2  109.89   16.58   2
  -7  -4  -2  768.17   60.60   3
  -7  -4  -2  763.78   49.87   1
   7   4   2  788.60   59.65   2
   8   4   2  193.04   22.71   2
  -8  -4  -2  200.67   23.19   3
  -8  -4  -2  170.03   15.49   1
  -9  -4  -2   12.82    6.15   1
   9   4   2   10.53   10.66   2
  -9  -4  -2   25.83   11.71   3
  10   4   2  269.47   30.53   2
 -10  -4  -2  327.26   32.59   3
  11   4   2   10.70   10.98   2
 -11  -4  -2    9.79   11.92   3
 -12  -4  -2 1064.80   85.70   3
 -13  -4  -2   20.61   13.56   3
 -14  -4  -2  208.19   31.67   3
 -15  -4  -2  274.97   36.71   3
  15  -5  -2   12.07   13.32   1
  15  -5  -2   -3.93    9.71   4
  14  -5  -2  170.78   21.65   4
  14  -5  -2  137.58   24.20   1
  13  -5  -2   55.38   13.26   4
  13  -5  -2   58.18   17.49   1
  12  -5  -2  200.37   28.76   1
  12  -5  -2  207.45   25.25   4
 -11   5   2   22.15   14.14   2
  11  -5  -2   10.44   10.03   4
  11  -5  -2    6.49   14.51   1
 -10   5   2  433.35   42.29   2
 -10   5   2  500.28   37.48   1
  -9   5   2 1530.38   93.66   1
  -9   5   2 1324.52  103.66   2
  -8   5   2   -4.06    8.40   2
  -8   5   2    2.12    8.50   1
   7  -5  -2  248.14   24.63   3
  -7   5   2  284.64   27.12   2
  -7   5   2  267.42   22.88   1
   6  -5  -2  468.87   37.19   1
   6  -5  -2  404.87   36.15   3
  -6   5   2  478.71   37.85   2
   6  -5  -2  461.59   33.62   4
   5  -5  -2 1974.07  122.91   1
  -5   5   2 1904.70  132.39   2
   5  -5  -2 1868.00  110.25   4
  -4   5   2  216.37   21.28   2
   4  -5  -2  219.74   21.68   1
   4  -5  -2  208.34   18.90   3
   4  -5  -2  226.83   20.30   4
   3  -5  -2  219.10   20.14   1
   3  -5  -2  178.74   16.91   3
   3  -5  -2  216.96   18.55   4
  -3   5   2  219.20   20.23   2
   2  -5  -2 3726.09  221.47   1
   2  -5  -2 3628.73  198.34   4
   2  -5  -2 3292.92  246.74   3
  -2   5   2 3794.03  242.69   2
  -1   5   2 1535.58  104.41   2
   1  -5  -2 1474.31   95.76   1
   1  -5  -2 1525.85   86.27   4
   0  -5  -2  331.31   27.12   3
   0   5   2  369.57   28.77   2
   0  -5  -2  341.74   26.89   1
   1   5   2 2307.46  158.29   2
  -1  -5  -2 2320.92  161.39   3
  -1  -5  -2 2349.86  144.72   1
  -2  -5  -2 1943.24  122.62   1
  -2  -5  -2 1881.54  135.99   3
   2   5   2 2003.33  133.58   2
  -3  -5  -2  768.10   58.16   1
  -3  -5  -2  942.94   64.31   3
   3   5   2  876.73   63.00   2
  -4  -5  -2   69.55   12.40   3
  -4  -5  -2  108.25   14.20   1
   4   5   2   83.37   13.13   2
  -5  -5  -2 1753.98  124.65   3
   5   5   2 1647.65  121.47   2
  -5  -5  -2 1820.38  108.91   1
   6   5   2   54.74   12.79   2
  -6  -5  -2   77.40    9.81   1
  -6  -5  -2   56.21   12.31   3
  -7  -5  -2  266.58   26.46   3
  -7  -5  -2  240.15   19.38   1
   7   5   2  227.19   24.77   2
  -8  -5  -2   10.49    6.26   1
  -8  -5  -2    2.05    8.68   3
   8   5   2   -5.16    8.56   2
  -9  -5  -2  420.59   39.60   3
   9   5   2  410.43   38.30   2
 -10  -5  -2 1329.42   99.73   3
  10   5   2 1256.24   96.55   2
 -11  -5  -2   48.06   15.37   3
 -12  -5  -2  295.54   33.61   3
 -13  -5  -2   29.54   14.00   3
 -14  -5  -2  129.71   25.47   3
 -15  -5  -2   13.59   15.47   3
  15  -6  -2    8.70   13.35   1
  15  -6  -2    9.23   11.13   4
  14  -6  -2  259.54   29.86   4
  14  -6  -2  253.28   34.27   1
  13  -6  -2    3.06   12.09   1
  13  -6  -2   -9.00    8.58   4
  12  -6  -2  315.56   35.79   1
 -12   6   2  285.44   35.31   2
  12  -6  -2  276.90   30.45   4
  11  -6  -2  348.60   35.39   1
  11  -6  -2  383.05   32.31   4
 -11   6   2  354.31   37.04   2
  10  -6  -2  149.76   23.94   1
  10  -6  -2  132.72   20.38   4
 -10   6   2  125.13   22.75   2
   9  -6  -2    5.97    8.53   4
   9  -6  -2   -0.98   10.25   1
  -9   6   2   15.16   12.25   2
   8  -6  -2   33.21   13.14   1
  -8   6   2   21.85   12.70   2
   8  -6  -2   24.58   10.00   4
   7  -6  -2 1035.20   66.09   4
   7  -6  -2 1044.93   73.31   1
  -7   6   2 1036.16   77.58   2
   6  -6  -2   12.07   10.51   1
  -6   6   2   12.12    9.03   2
   6  -6  -2   10.88    9.36   4
   5  -6  -2  242.04   24.22   1
  -5   6   2  237.20   24.26   2
   5  -6  -2  262.22   22.91   4
   4  -6  -2  943.13   65.08   1
  -4   6   2  946.73   68.69   2
   4  -6  -2  919.33   58.49   4
   3  -6  -2  672.57   45.38   4
  -3   6   2  713.51   52.81   2
   3  -6  -2  722.22   50.59   1
   2  -6  -2  243.20   21.94   1
   2  -6  -2  236.85   20.27   4
   2  -6  -2  175.40   18.01   3
  -2   6   2  245.38   21.56   2
  -1   6   2    1.32    6.47   2
   1  -6  -2    2.62    4.29   3
   1  -6  -2   -5.10    5.56   4
   1  -6  -2   -5.61    6.55   1
   0   6   2  451.59   34.30   2
   0  -6  -2  417.69   32.57   1
   0  -6  -2  384.83   32.09   3
  -1  -6  -2   40.49    8.09   3
   1   6   2   35.95    9.58   2
  -1  -6  -2   47.84   11.61   1
   2   6   2    2.28    7.03   2
  -2  -6  -2   16.04   10.16   1
  -2  -6  -2    0.73    5.58   3
   3   6   2  378.08   31.24   2
  -3  -6  -2  333.89   31.19   1
  -3  -6  -2  363.91   30.89   3
  -4  -6  -2  904.54   67.39   3
   4   6   2  890.16   66.44   2
   5   6   2  956.59   71.17   2
  -5  -6  -2  959.61   72.47   3
  -5  -6  -2  968.96   64.69   1
  -6  -6  -2  368.17   34.50   3
   6   6   2  384.94   34.08   2
  -6  -6  -2  410.61   30.10   1
   7   6   2  944.25   75.86   2
  -7  -6  -2 1072.51   78.78   3
  -7  -6  -2 1041.30   66.47   1
   8   6   2  254.29   28.13   2
  -8  -6  -2  290.89   29.79   3
  -9  -6  -2  151.83   22.51   3
   9   6   2  138.50   21.51   2
  10   6   2   27.62   12.33   2
 -10  -6  -2   37.63   14.14   3
 -11  -6  -2   90.78   19.77   3
 -12  -6  -2  573.79   53.49   3
 -13  -6  -2    6.15   12.84   3
 -14  -6  -2  114.80   24.43   3
  14  -7  -2  137.94   25.85   1
  14  -7  -2  159.09   23.01   4
  13  -7  -2   64.09   14.41   4
  13  -7  -2   56.78   16.29   1
  12  -7  -2  878.86   68.86   1
 -12   7   2  891.71   74.08   2
  12  -7  -2  885.44   61.96   4
 -11   7   2   47.02   16.56   2
  11  -7  -2   10.05    8.84   4
  11  -7  -2    3.00   11.12   1
  10  -7  -2  147.79   25.20   1
 -10   7   2  134.90   24.14   2
  10  -7  -2  183.10   23.76   4
   9  -7  -2  471.77   37.81   4
  -9   7   2  481.69   43.93   2
   9  -7  -2  442.94   41.39   1
   8  -7  -2    8.98    8.03   4
   8  -7  -2   -9.95    8.87   1
  -8   7   2    4.32   12.14   2
   7  -7  -2   -4.51    7.98   4
  -7   7   2   14.08   11.72   2
   7  -7  -2   -0.02   10.57   1
  -6   7   2   42.51   12.72   2
   6  -7  -2   37.81   11.62   4
   6  -7  -2   19.73   13.15   1
   5  -7  -2 2401.67  138.47   4
   5  -7  -2 2415.11  154.17   1
  -5   7   2 2396.43  166.18   2
   4  -7  -2  248.24   23.83   4
  -4   7   2  246.23   24.42   2
   4  -7  -2  246.92   26.50   1
  -3   7   2   52.65   11.47   2
   3  -7  -2   58.11   13.45   1
   3  -7  -2   38.54   11.15   4
   2  -7  -2 2477.60  156.25   1
   2  -7  -2 2600.02  140.54   4
   2  -7  -2 2243.74  169.91   3
  -2   7   2 2567.32  169.48   2
   1  -7  -2   26.27    9.03   1
   1  -7  -2    5.21    4.55   3
  -1   7   2    0.77    6.20   2
   0   7   2  324.22   27.42   2
   0  -7  -2  300.46   27.73   1
   0  -7  -2  293.73   25.14   3
  -1  -7  -2   24.80   10.57   1
  -1  -7  -2   15.11    6.85   3
   1   7   2   15.66    8.71   2
  -2  -7  -2  925.19   66.81   1
  -2  -7  -2  977.06   70.35   3
   2   7   2  956.75   70.16   2
  -3  -7  -2 1292.47   95.09   1
   3   7   2 1493.51  101.75   2
  -3  -7  -2 1484.97  102.79   3
  -4  -7  -2   -3.27   10.23   1
   4   7   2   -6.81    7.62   2
  -4  -7  -2   11.11    7.18   3
  -5  -7  -2  617.68   51.78   1
   5   7   2  757.50   56.43   2
  -5  -7  -2  775.22   57.11   3
  -6  -7  -2  180.61   21.80   3
   6   7   2  150.53   21.42   2
  -6  -7  -2  190.89   20.94   1
  -7  -7  -2   64.73   15.12   3
   7   7   2   81.44   15.75   2
  -8  -7  -2    3.49   10.48   3
   8   7   2   14.31   10.19   2
   9   7   2  944.90   79.36   2
  -9  -7  -2 1144.35   83.76   3
  10   7   2  468.80   41.98   2
 -10  -7  -2  451.69   43.47   3
 -11  -7  -2   11.18   10.36   3
 -12  -7  -2   94.13   21.45   3
 -13  -7  -2   -6.69   13.03   3
 -14  -7  -2  272.06   36.11   3
  14  -8  -2  531.32   50.78   1
  14  -8  -2  470.70   41.30   4
  13  -8  -2   39.12   18.32   1
  13  -8  -2   -4.36    9.13   4
 -12   8   2  267.08   37.10   2
  12  -8  -2  341.40   40.55   1
  12  -8  -2  302.41   33.46   4
 -11   8   2  182.32   28.77   2
  11  -8  -2  208.40   31.65   1
  11  -8  -2  174.07   24.76   4
  10  -8  -2  383.20   34.60   4
  10  -8  -2  438.72   44.14   1
 -10   8   2  384.49   41.03   2
  -9   8   2   36.22   15.78   2
   9  -8  -2   34.74   12.49   4
   9  -8  -2   40.60   15.98   1
  -8   8   2   29.94   14.10   2
   8  -8  -2   36.40   12.05   4
   8  -8  -2   15.19   13.78   1
   7  -8  -2 1049.04   71.44   4
   7  -8  -2 1161.66   80.46   1
  -7   8   2 1090.73   83.39   2
   6  -8  -2   -6.65    8.58   4
  -6   8   2    5.58   10.13   2
   6  -8  -2    1.92   11.21   1
  -5   8   2   76.78   15.61   2
   5  -8  -2   89.79   18.74   1
   5  -8  -2   54.77   14.89   4
  -4   8   2  575.66   43.96   2
   4  -8  -2  495.22   42.35   1
   4  -8  -2  505.34   38.93   4
  -3   8   2 1073.55   78.44   2
   3  -8  -2 1092.95   67.56   4
   3  -8  -2 1042.35   74.60   1
   2  -8  -2    8.65    9.21   1
  -2   8   2    1.50    7.34   2
  -1   8   2   31.48    9.72   2
   1  -8  -2   20.60    5.88   3
   1  -8  -2   26.70   10.63   1
   0   8   2 1357.07   98.66   2
   0  -8  -2 1434.72   98.65   3
   0  -8  -2 1377.11   93.30   1
  -1  -8  -2  211.67   20.69   3
  -1  -8  -2  234.22   26.28   1
   1   8   2  223.93   22.74   2
  -2  -8  -2   97.45   14.16   3
  -2  -8  -2  122.29   20.63   1
   2   8   2  139.73   18.19   2
  -3  -8  -2  212.78   22.53   3
  -3  -8  -2  220.98   28.36   1
   3   8   2  231.59   24.00   2
   4   8   2  363.95   32.59   2
  -4  -8  -2  370.13   32.07   3
  -4  -8  -2  313.34   34.99   1
   5   8   2  641.46   47.08   2
  -5  -8  -2  525.07   45.65   3
  -5  -8  -2  484.56   43.97   1
  -6  -8  -2   72.60   14.93   3
   6   8   2   81.18   16.53   2
   7   8   2 1392.00  109.69   2
  -7  -8  -2 1639.12  114.19   3
   8   8   2  224.09   27.60   2
  -8  -8  -2  232.41   28.11   3
   9   8   2  205.61   27.35   2
  -9  -8  -2  247.17   29.28   3
 -10  -8  -2   42.16   15.19   3
 -11  -8  -2   42.42   14.13   3
 -12  -8  -2  251.22   32.69   3
 -13  -8  -2    0.03    9.93   3
 -13   9   2   46.35   20.84   2
  13  -9  -2   81.63   18.84   4
  13  -9  -2   64.83   22.02   1
  12  -9  -2  560.94   49.87   1
  12  -9  -2  487.90   41.85   4
 -12   9   2  440.81   49.24   2
  11  -9  -2   41.16   12.94   4
 -11   9   2    5.29   14.22   2
  11  -9  -2   35.17   17.73   1
 -10   9   2   99.94   22.11   2
  10  -9  -2   65.85   20.37   1
  10  -9  -2   71.71   16.20   4
  -9   9   2  442.80   45.24   2
   9  -9  -2  512.45   40.51   4
   9  -9  -2  469.23   44.62   1
   8  -9  -2   69.20   19.74   1
  -8   9   2   67.82   18.16   2
   8  -9  -2  100.22   19.99   4
  -7   9   2   10.64   11.50   2
   7  -9  -2   30.32   14.71   1
   7  -9  -2   41.16   14.60   4
  -6   9   2  175.96   24.43   2
   6  -9  -2  215.94   28.73   1
   6  -9  -2  207.30   26.46   4
   5  -9  -2  900.82   61.59   4
  -5   9   2  921.97   70.27   2
   5  -9  -2  906.57   68.01   1
   4  -9  -2   20.93   11.41   4
   4  -9  -2   22.45   13.10   1
  -4   9   2   11.60   10.12   2
   3  -9  -2   20.15   12.83   1
  -3   9   2   32.94   10.81   2
   2  -9  -2  278.86   30.90   1
  -2   9   2  299.63   28.25   2
  -1   9   2  564.37   43.99   2
   1  -9  -2  503.33   43.78   1
   0   9   2  169.09   20.95   2
   0  -9  -2  176.95   17.80   3
   0  -9  -2  207.59   25.25   1
  -1  -9  -2   22.13   12.86   1
  -1  -9  -2   19.42    7.64   3
   1   9   2   28.02   10.76   2
   2   9   2 1213.35   90.85   2
  -2  -9  -2 1278.12   91.19   3
  -2  -9  -2 1259.84   87.98   1
  -3  -9  -2   86.49   13.48   3
  -3  -9  -2   33.03   17.90   1
   3   9   2   77.11   15.58   2
  -4  -9  -2   -1.48    6.93   3
   4   9   2    9.96    9.66   2
  -4  -9  -2  -18.68   13.46   1
   5   9   2    2.49    9.63   2
  -5  -9  -2   11.02   14.00   1
  -5  -9  -2   22.82    9.88   3
   6   9   2  190.49   25.36   2
  -6  -9  -2  220.84   25.44   3
  -7  -9  -2  374.51   36.97   3
   7   9   2  399.71   37.51   2
   8   9   2    6.23   11.69   2
  -8  -9  -2   -1.27    9.19   3
  -9  -9  -2  852.33   70.70   3
 -10  -9  -2   21.71   13.05   3
 -11  -9  -2  157.48   25.88   3
 -12  -9  -2   60.84   17.74   3
 -13  -9  -2   96.04   23.01   3
 -13  10   2   24.67   18.47   2
 -12  10   2   84.19   24.19   2
  12 -10  -2   97.76   26.24   1
  12 -10  -2  116.57   21.78   4
  11 -10  -2   58.77   21.50   1
 -11  10   2   59.81   20.55   2
  11 -10  -2   66.10   17.99   4
 -10  10   2  428.27   45.15   2
  10 -10  -2  471.72   40.23   4
  10 -10  -2  430.17   43.38   1
  -9  10   2   10.12   13.89   2
   9 -10  -2    9.14   15.03   1
   9 -10  -2    0.83   15.06   4
  -8  10   2  231.62   31.02   2
   8 -10  -2  246.59   30.72   4
   8 -10  -2  260.06   34.67   1
  -7  10   2  720.06   60.18   2
   7 -10  -2  730.59   59.72   1
   7 -10  -2  716.20   54.37   4
   6 -10  -2   11.51   12.66   4
  -6  10   2   13.79   12.29   2
   6 -10  -2   -6.54   11.16   1
   5 -10  -2  -10.61   11.85   4
   5 -10  -2    8.23   12.81   1
  -5  10   2    5.00   11.50   2
   4 -10  -2  342.35   34.58   1
  -4  10   2  323.39   32.16   2
   3 -10  -2  531.31   43.99   1
  -3  10   2  453.86   41.76   2
  -2  10   2   62.70   14.17   2
   2 -10  -2   26.56   14.61   1
  -1  10   2  128.10   18.83   2
   1 -10  -2  122.92   21.88   1
   0  10   2 1049.65   73.56   2
   0 -10  -2  892.04   70.91   1
  -1 -10  -2  145.26   25.03   1
   1  10   2  155.88   20.64   2
  -2 -10  -2   13.13   16.18   1
  -2 -10  -2   34.39    9.89   3
   2  10   2   23.76   11.24   2
  -3 -10  -2   15.19   17.43   1
   3  10   2   25.95   11.04   2
  -3 -10  -2   19.08    9.55   3
  -4 -10  -2  296.58   28.85   3
  -4 -10  -2  307.92   36.55   1
   4  10   2  278.70   29.64   2
  -5 -10  -2  815.86   67.96   3
   5  10   2  916.66   68.53   2
  -6 -10  -2   60.56   13.80   3
   6  10   2   60.23   14.89   2
  -7 -10  -2  801.87   63.70   3
   7  10   2  723.28   62.05   2
   8  10   2    7.34   12.19   2
  -8 -10  -2    6.71    9.45   3
  -9 -10  -2  119.86   21.68   3
 -10 -10  -2   48.11   15.14   3
 -11 -10  -2  202.73   29.34   3
 -12 -10  -2  256.83   34.31   3
 -12  11   2  245.17   36.40   2
 -11  11   2   14.96   18.71   2
  11 -11  -2   69.54   18.16   4
  11 -11  -2   22.44   15.84   1
 -10  11   2  230.12   33.62   2
  10 -11  -2  208.90   31.91   4
  10 -11  -2  234.05   35.85   1
  -9  11   2  105.65   22.44   2
   9 -11  -2  107.80   25.87   1
   9 -11  -2   61.49   21.44   4
   8 -11  -2  400.54   44.50   1
  -8  11   2  370.54   39.55   2
   8 -11  -2  377.90   39.26   4
  -7  11   2   59.67   16.08   2
   7 -11  -2   70.93   21.13   1
   7 -11  -2   56.40   16.92   4
  -6  11   2   72.21   17.13   2
   6 -11  -2   57.54   19.20   1
   5 -11  -2  896.56   70.85   1
  -5  11   2  921.91   71.69   2
   4 -11  -2   44.55   18.93   1
  -4  11   2   27.98   12.17   2
  -3  11   2   30.75   12.24   2
   3 -11  -2   35.13   15.89   1
   2 -11  -2  164.18   27.36   1
  -2  11   2  144.51   21.31   2
   1 -11  -2  417.58   39.79   1
  -1  11   2  427.92   38.10   2
   0 -11  -2   28.65   14.66   1
   0  11   2   11.56   10.98   2
  -1 -11  -2   20.13   14.55   1
   1  11   2    4.96    9.78   2
   2  11   2 1109.75   80.70   2
  -2 -11  -2 1023.47   79.54   1
  -3 -11  -2   36.24   17.53   1
   3  11   2    5.10    9.92   2
  -3 -11  -2    5.27    7.39   3
  -4 -11  -2   74.64   13.72   3
   4  11   2   70.29   15.61   2
  -5 -11  -2   64.27   14.07   3
   5  11   2   57.54   15.19   2
  -6 -11  -2  242.58   27.66   3
   6  11   2  267.39   31.12   2
  -7 -11  -2  409.21   39.44   3
   7  11   2  422.92   40.08   2
  -8 -11  -2   20.66   10.75   3
  -9 -11  -2  218.50   29.50   3
 -10 -11  -2   53.16   16.13   3
 -11 -11  -2   56.03   16.16   3
 -11  12   2   43.34   20.47   2
 -10  12   2  351.75   42.24   2
  10 -12  -2  329.48   44.88   1
  10 -12  -2  307.35   39.94   4
  -9  12   2   38.52   16.30   2
   9 -12  -2   43.50   21.69   1
   9 -12  -2   25.37   17.50   4
   8 -12  -2  156.70   30.59   1
  -8  12   2  145.82   25.85   2
  -7  12   2  377.57   38.08   2
   7 -12  -2  341.96   42.74   1
   6 -12  -2   89.66   23.61   1
  -6  12   2   73.08   18.36   2
   5 -12  -2   -0.36   14.04   1
  -5  12   2   20.24   12.39   2
  -4  12   2   -0.93   11.02   2
   4 -12  -2   18.10   14.90   1
  -3  12   2  550.11   46.67   2
   3 -12  -2  523.86   48.38   1
  -2  12   2  228.14   28.51   2
   2 -12  -2  284.46   35.39   1
  -1  12   2   88.88   17.13   2
   1 -12  -2   62.36   19.37   1
   0  12   2  438.08   38.83   2
   0 -12  -2  407.24   40.97   1
   1  12   2  138.16   20.37   2
  -1 -12  -2  124.97   26.32   1
   2  12   2   17.39   11.17   2
  -2 -12  -2   16.42   17.21   1
   3  12   2    0.11    9.96   2
   4  12   2  685.07   56.47   2
   5  12   2  115.91   19.00   2
  -5 -12  -2   91.94   17.73   3
   6  12   2   19.21   12.10   2
  -6 -12  -2   36.87   12.23   3
  -7 -12  -2  123.87   20.63   3
   7  12   2  107.92   21.09   2
  -8 -12  -2   32.29   13.42   3
  -9 -12  -2  105.60   21.00   3
 -10 -12  -2   18.28   12.32   3
   9 -13  -2   34.24   19.60   1
  -9  13   2   20.81   17.27   2
   8 -13  -2  273.82   40.83   1
  -8  13   2  232.54   33.56   2
   7 -13  -2  115.96   27.13   1
  -7  13   2  114.63   22.33   2
  -6  13   2   79.00   19.15   2
   6 -13  -2   56.39   18.86   1
   5 -13  -2  287.46   38.45   1
  -5  13   2  270.28   30.75   2
  -4  13   2    4.80   11.11   2
   4 -13  -2    2.54   14.26   1
   3 -13  -2   11.56   15.67   1
  -3  13   2   16.17   11.12   2
  -2  13   2   42.17   13.37   2
   2 -13  -2   48.12   17.53   1
  -1  13   2  304.58   30.70   2
   1 -13  -2  269.01   36.07   1
   0 -13  -2   94.72   21.99   1
   0  13   2   90.99   18.19   2
   1  13   2    3.39   10.04   2
  -1 -13  -2   17.96   15.63   1
   2  13   2  829.24   66.33   2
   3  13   2   30.93   12.72   2
   4  13   2   22.32   12.10   2
   5  13   2   48.60   14.02   2
   6  13   2  268.29   30.15   2
  -8 -13  -2   14.11   10.17   3
  -9 -13  -2  146.28   23.46   3
   8 -14  -2   94.33   26.22   1
   7 -14  -2  126.30   27.70   1
  -7  14   2  119.15   23.20   2
  -6  14   2   72.25   18.27   2
   6 -14  -2   81.13   23.65   1
  -5  14   2   15.87   11.71   2
   5 -14  -2   26.11   19.09   1
   4 -14  -2  120.97   25.69   1
  -4  14   2  130.06   21.62   2
  -3  14   2  569.04   50.68   2
   3 -14  -2  595.78   54.08   1
  -2  14   2    9.76   11.57   2
   2 -14  -2   12.54   14.67   1
  -1  14   2   13.55   10.72   2
   1 -14  -2   25.63   16.36   1
   0 -14  -2   79.17   20.67   1
   0  14   2  113.10   19.46   2
   1  14   2  101.57   17.93   2
   2  14   2  127.63   21.08   2
   3  14   2   35.00   13.00   2
   4  14   2  589.34   51.27   2
   5  14   2    8.58   11.44   2
   6 -15  -2   58.08   20.71   1
  -5  15   2  217.02   30.40   2
   5 -15  -2  272.32   39.41   1
   4 -15  -2   70.60   22.10   1
  -4  15   2   94.35   19.60   2
   3 -15  -2    7.66   16.08   1
  -3  15   2   25.83   13.64   2
   2 -15  -2   37.77   18.58   1
  -2  15   2   47.75   13.58   2
   1 -15  -2  175.66   31.10   1
  -1  15   2  175.30   25.66   2
   0  15   2   69.94   16.82   2
   1  15   2    0.47   11.77   2
   2  15   2  219.93   28.82   2
   3  15   2   18.90   12.24   2
   4  15   2   26.07   14.42   2
   5  15   2   10.56   12.76   2
   4 -16  -2   54.40   20.05   1
   3 -16  -2  136.03   26.95   1
   2 -16  -2   48.63   19.93   1
   0  16   2   44.89   14.06   2
   1  16   2  220.46   28.41   2
   2  16   2  107.36   20.45   2
   3  16   2   10.35   12.01   2
   4  16   2  189.67   24.68   2
  -1 -15   3   87.64   23.87   1
   0  15  -3   39.18   13.67   2
   0 -15   3   19.72   19.74   1
  -1  15  -3  155.38   22.02   2
  -2  15  -3   99.53   18.59   2
  -2 -14   3   20.58   26.87   1
  -1 -14   3  233.55   41.59   1
   1  14  -3  385.86   33.06   2
   0  14  -3   89.65   17.55   2
   0 -14   3   85.28   27.71   1
  -1  14  -3  148.13   20.83   2
   1 -14   3   94.01   28.10   1
  -2  14  -3   64.67   15.26   2
   2 -14   3   42.47   18.67   1
  -3  14  -3  154.80   21.71   2
   3 -14   3  130.54   29.30   1
   4 -14   3   91.33   24.03   1
  -4  14  -3  134.64   22.25   2
  -5  14  -3    5.96   11.00   2
   5 -14   3  -10.09   16.33   1
  -3 -13   3   41.64   27.24   1
  -2 -13   3   37.10   22.57   1
  -1 -13   3   21.14   20.61   1
   1  13  -3   50.64   13.55   2
   0 -13   3   12.47   19.52   1
   0  13  -3    1.34   10.81   2
  -1  13  -3  307.86   30.13   2
   1 -13   3  268.81   39.17   1
  -2  13  -3   64.12   15.18   2
   2 -13   3   37.98   21.66   1
  -3  13  -3    2.89   11.05   2
   3 -13   3   49.93   19.79   1
  -4  13  -3  161.35   23.01   2
   4 -13   3  162.54   31.55   1
  -5  13  -3    6.69   11.81   2
   5 -13   3  -26.15   14.00   1
  -6  13  -3  110.31   21.01   2
   6 -13   3  112.67   26.30   1
  -7  13  -3    5.66   12.21   2
   7 -13   3    8.99   18.95   1
   9  12  -3   54.72   19.02   3
  -4 -12   3  130.98   32.62   1
  -3 -12   3   37.56   24.35   1
  -2 -12   3   43.60   21.73   1
   2  12  -3   18.60   10.73   2
  -1 -12   3  229.86   37.99   1
   1  12  -3  345.49   29.84   2
   0  12  -3   48.11   13.74   2
   0 -12   3   47.15   20.64   1
  -1  12  -3  168.49   21.90   2
   1 -12   3  154.64   26.85   1
   2 -12   3   15.82   16.28   1
  -2  12  -3   22.83   12.04   2
   3 -12   3  133.46   28.55   1
  -3  12  -3  179.26   23.57   2
   4 -12   3  376.37   48.18   1
  -4  12  -3  562.41   43.77   2
   5 -12   3   -4.72   14.73   1
  -5  12  -3    6.13   11.61   2
  -6  12  -3  157.05   23.27   2
   6 -12   3  116.20   27.95   1
   7 -12   3   -6.05   14.67   1
  -7  12  -3   58.67   15.62   2
  -8  12  -3   58.19   16.34   2
   8 -12   3   77.81   23.80   1
   9 -12   3   13.50   16.03   1
  -9  12  -3   18.45   16.33   2
  10  11  -3   53.43   21.01   3
   9  11  -3   95.09   23.64   3
   8  11  -3   24.95   16.91   3
   7  11  -3    6.71   14.92   3
   6  11  -3  686.60   61.53   3
  -5 -11   3   40.58   23.59   1
  -4 -11   3    0.82   22.65   1
  -3 -11   3  160.81   33.29   1
   3  11  -3  197.78   22.65   2
   2  11  -3  262.24   26.17   2
  -2 -11   3  225.72   37.32   1
  -1 -11   3   36.34   20.47   1
   1  11  -3   26.41   11.07   2
   0 -11   3    0.78   15.57   1
   0  11  -3  -12.62    8.60   2
  -1  11  -3  343.52   32.65   2
   1 -11   3  351.12   43.67   1
   2 -11   3   47.41   19.08   1
  -2  11  -3   50.48   13.23   2
   3 -11   3  102.05   24.76   1
  -3  11  -3  109.90   18.63   2
  -4  11  -3  169.98   22.55   2
   4 -11   3  124.64   26.84   1
   5 -11   3  294.50   39.60   1
  -5  11  -3  319.38   32.04   2
  -6  11  -3  276.14   28.70   2
   6 -11   3  231.69   36.02   1
  -7  11  -3    6.22   11.64   2
   7 -11   3    2.73   14.96   1
  -8  11  -3  152.69   24.19   2
   8 -11   3  113.45   26.11   1
   9 -11   3   78.14   21.18   1
  -9  11  -3   73.63   19.46   2
  10 -11   3   15.50   14.57   1
 -10  11  -3   43.85   18.93   2
  11 -11   3   28.36   16.50   1
  10  10  -3   71.49   23.10   3
   9  10  -3   -7.90   17.16   3
   8  10  -3  269.57   37.91   3
   7  10  -3  120.41   25.07   3
   6  10  -3   27.08   16.34   3
  -6 -10   3   23.57   21.52   1
   5  10  -3    2.92   11.80   3
  -5 -10   3   -7.23   19.08   1
  -4 -10   3  329.37   48.29   1
   4  10  -3  483.73   40.74   3
   3  10  -3  165.03   19.86   2
  -3 -10   3  143.61   31.05   1
  -2 -10   3   27.68   20.23   1
   2  10  -3   32.42   11.10   2
  -1 -10   3  119.63   27.17   1
   1  10  -3  121.33   17.13   2
   0 -10   3   46.43   18.16   1
   0  10  -3   33.64   10.73   2
   1 -10   3  121.43   26.00   1
  -1  10  -3  133.59   18.56   2
  -2  10  -3   26.86   11.03   2
   2 -10   3   -2.57   14.32   1
   3 -10   3  516.19   48.00   1
  -3  10  -3  484.36   42.40   2
  -4  10  -3  240.21   25.94   2
   4 -10   3  224.57   33.06   1
   5 -10   3   39.91   18.21   1
  -5  10  -3   57.69   15.22   2
   6 -10   3  148.43   29.01   1
  -6  10  -3  150.03   22.94   2
   7 -10   3    5.66   12.84   1
  -7  10  -3    8.78   11.79   2
   8 -10   3  361.00   43.04   1
  -8  10  -3  364.24   38.07   2
  -9  10  -3    0.95   14.62   2
   9 -10   3  -10.28   11.40   1
 -10  10  -3  526.61   51.18   2
  10 -10   3  542.05   51.13   1
 -11  10  -3  106.56   24.91   2
  11 -10   3  107.29   24.28   1
 -12  10  -3   90.07   22.18   2
  12 -10   3   13.91   15.42   1
  11   9  -3   75.25   23.91   3
  10   9  -3   11.63   17.36   3
   9   9  -3  290.65   40.26   3
   8   9  -3    4.38   14.25   3
  -7  -9   3  182.32   34.32   1
   7   9  -3  233.04   32.73   3
  -6  -9   3  753.19   71.60   1
   6   9  -3 1037.03   76.85   3
   5   9  -3  -13.08   11.94   3
  -5  -9   3   20.43   23.36   1
  -4  -9   3   32.49   22.67   1
   4   9  -3   38.54   14.54   3
   4   9  -3   12.46    9.32   2
   3   9  -3  220.72   26.11   3
   3   9  -3  243.27   23.47   2
  -3  -9   3  259.64   38.86   1
  -2  -9   3  847.07   69.91   1
   2   9  -3  818.87   62.22   2
   1   9  -3  228.11   23.34   2
  -1  -9   3  243.30   35.55   1
   0  -9   3   16.38   15.22   1
   0   9  -3    7.82    8.72   2
   1  -9   3 1116.72   85.44   1
  -1   9  -3 1179.16   83.72   2
   2  -9   3   21.94   14.56   1
  -2   9  -3   18.37   10.38   2
  -3   9  -3    1.64    9.71   2
   3  -9   3   12.96   13.35   1
  -4   9  -3   37.78   12.95   2
   4  -9   3   55.68   18.92   1
   5  -9   3  630.29   56.19   1
  -5   9  -3  672.69   53.42   2
   6  -9   3  245.42   34.18   1
  -6   9  -3  250.47   28.03   2
   7  -9   3  102.60   22.81   1
  -7   9  -3  110.91   20.30   2
   8  -9   3  563.13   51.50   1
  -8   9  -3  582.55   51.46   2
  -9   9  -3   -0.45   14.55   2
   9  -9   3    6.71   12.09   1
  10  -9   3  160.23   29.73   1
 -10   9  -3  148.76   26.40   2
 -11   9  -3    9.21   15.61   2
  11  -9   3    4.95   14.29   1
 -12   9  -3  115.12   26.40   2
  12  -9   3  119.42   24.66   1
 -13   9  -3  262.93   38.86   2
  13  -9   3  270.63   38.76   1
  12   8  -3    7.94   16.75   3
  11   8  -3  587.49   59.74   3
  10   8  -3    2.11   16.71   3
   9   8  -3   30.81   17.53   3
   8   8  -3  110.27   24.02   3
  -8  -8   3   53.10   21.45   1
   7   8  -3   93.15   21.15   3
  -7  -8   3   59.80   24.24   1
   6   8  -3   25.25   15.12   3
  -6  -8   3   -9.14   18.78   1
  -5  -8   3   58.55   22.99   1
   5   8  -3   79.65   18.51   3
   4   8  -3  500.27   38.27   2
  -4  -8   3  425.94   49.69   1
   4   8  -3  467.73   42.05   3
  -3  -8   3   -1.16   20.00   1
   3   8  -3   12.66    8.19   2
   3   8  -3   25.77   10.31   3
   2   8  -3    4.62    7.31   3
  -2  -8   3   13.91   19.18   1
   2   8  -3    1.34    7.34   2
   1   8  -3  252.85   22.92   2
  -1  -8   3  222.50   33.21   1
   1   8  -3  194.21   21.50   3
   0   8  -3  317.02   28.54   2
   0  -8   3  334.61   38.54   1
   1  -8   3  208.83   31.19   1
  -1   8  -3  237.51   22.82   2
   2  -8   3   88.97   20.98   1
  -2   8  -3   71.21   13.97   2
   3  -8   3  718.13   58.33   1
  -3   8  -3  723.52   55.63   2
   4  -8   3   48.40   18.77   1
  -4   8  -3   64.37   14.26   2
   5  -8   3  199.55   29.43   1
  -5   8  -3  199.61   23.91   2
  -6   8  -3  571.31   47.57   2
   6  -8   3  552.55   49.10   1
  -7   8  -3  197.29   25.47   2
   7  -8   3  178.76   29.80   1
  -8   8  -3  831.85   66.75   2
   8  -8   3  808.33   66.00   1
  -9   8  -3    0.31   12.98   2
   9  -8   3    3.18   12.97   1
  10  -8   3  226.12   34.01   1
 -10   8  -3  225.96   31.54   2
 -11   8  -3   41.36   18.91   2
  11  -8   3   62.82   18.54   4
  11  -8   3   48.76   18.68   1
  12  -8   3  154.29   24.34   4
 -12   8  -3  166.67   30.33   2
  12  -8   3  174.66   30.19   1
 -13   8  -3   19.95   17.27   2
  13  -8   3    7.14   13.71   1
  13  -8   3   29.56   12.37   4
  14  -8   3    0.78   16.14   1
 -14   8  -3  137.06   30.18   2
  14  -8   3   66.52   18.37   4
  12   7  -3   40.58   23.39   3
  11   7  -3   43.25   18.81   3
  10   7  -3   29.89   17.06   3
  -9  -7   3  582.20   46.49   1
   9   7  -3  478.93   51.33   3
  -8  -7   3   88.45   20.69   1
   8   7  -3   76.28   20.66   3
  -7  -7   3  132.91   26.65   1
   7   7  -3  110.95   23.51   3
  -6  -7   3  564.06   53.08   1
   6   7  -3  660.01   55.20   3
   5   7  -3   42.58   15.17   3
   5   7  -3   32.82    9.06   2
  -5  -7   3   36.17   20.20   1
   4   7  -3   33.72    9.29   2
  -4  -7   3   23.02   20.19   1
   4   7  -3   48.29   13.73   3
  -3  -7   3   61.25   23.90   1
   3   7  -3  104.66   16.12   3
   3   7  -3   71.31   11.88   2
  -2  -7   3 1213.96   88.87   1
   2   7  -3 1220.32   88.17   3
   2   7  -3 1144.17   84.03   2
   1   7  -3  428.05   34.55   3
  -1  -7   3  426.49   44.51   1
   1   7  -3  392.52   33.17   2
   0   7  -3    9.77    5.42   3
   0  -7   3    1.01   12.89   1
   0   7  -3    3.22    6.71   2
   1  -7   3 1012.19   75.91   1
  -1   7  -3 1027.33   74.40   3
  -1   7  -3 1064.35   74.63   2
   2  -7   3    1.67   11.87   1
  -2   7  -3    4.97    7.89   2
  -3   7  -3   87.98   14.91   2
   3  -7   3  111.36   21.48   1
   4  -7   3    7.57   11.11   1
  -4   7  -3    8.87    8.85   2
   5  -7   3  795.18   62.83   1
  -5   7  -3  839.66   62.77   2
   6  -7   3  337.87   37.39   1
  -6   7  -3  358.81   33.54   2
   7  -7   3   19.59   11.94   1
  -7   7  -3    4.22   11.27   2
   8  -7   3  496.59   44.49   1
  -8   7  -3  454.87   43.07   2
  -9   7  -3   -4.17   11.05   2
   9  -7   3    2.35   12.12   1
   9  -7   3   12.78   12.53   4
  10  -7   3  590.52   46.67   4
 -10   7  -3  540.15   51.53   2
  10  -7   3  569.48   50.57   1
 -11   7  -3  134.80   25.22   2
  11  -7   3  100.63   19.31   4
  11  -7   3  118.34   24.68   1
  12  -7   3  429.92   45.14   1
  12  -7   3  363.18   38.20   4
 -12   7  -3  350.45   43.22   2
  13  -7   3  206.09   28.53   4
 -13   7  -3  191.82   32.91   2
  13  -7   3  234.70   33.44   1
 -14   7  -3   56.24   20.76   2
  14  -7   3  -19.33   12.68   1
  14  -7   3   45.64   12.93   4
  15  -7   3   46.38   13.88   4
  15  -7   3   14.34   13.30   1
  13   6  -3   47.16   16.74   3
  12   6  -3  100.03   25.39   3
  11   6  -3  436.06   47.30   3
 -10  -6   3    6.28   12.52   1
  10   6  -3    7.82   13.26   3
  -9  -6   3  140.04   23.19   1
   9   6  -3  168.24   29.12   3
   8   6  -3  254.56   34.03   3
  -8  -6   3  281.69   31.62   1
  -7  -6   3  760.99   59.20   1
   7   6  -3  744.79   64.29   3
  -6  -6   3    7.85    9.33   3
  -6  -6   3   -0.79   15.51   1
   6   6  -3   15.96   13.02   3
   5   6  -3  298.99   31.27   3
  -5  -6   3  330.20   29.55   3
   5   6  -3  249.42   25.38   2
  -5  -6   3  340.67   38.08   1
  -4  -6   3  667.67   56.65   1
   4   6  -3  674.22   49.95   2
   4   6  -3  688.75   55.31   3
   3   6  -3    7.30    5.65   2
   3   6  -3   -4.00    8.27   3
  -3  -6   3   23.43   17.94   1
   2   6  -3    7.29    6.19   2
  -2  -6   3  -10.44   14.24   1
   2   6  -3   10.86    7.27   3
   1   6  -3  245.69   21.52   2
  -1  -6   3  268.15   32.83   1
   1   6  -3  196.92   21.24   3
   0   6  -3 1413.28  102.82   3
   0   6  -3 1435.05  100.40   2
   0  -6   3 1500.71  100.21   1
  -1   6  -3  440.80   35.09   2
  -1   6  -3  417.14   34.02   3
   1  -6   3  474.00   39.58   1
   2  -6   3   12.63   11.59   1
  -2   6  -3    1.62    6.44   2
   3  -6   3 1531.92  112.30   1
  -3   6  -3 1862.64  118.52   2
   4  -6   3    0.24    9.40   1
  -4   6  -3   -2.32    7.11   2
  -5   6  -3   69.01   14.06   2
   5  -6   3   77.53   17.61   1
  -6   6  -3  251.49   26.74   2
   6  -6   3  254.86   30.02   1
  -7   6  -3  490.35   42.23   2
   7  -6   3  462.88   37.70   4
   7  -6   3  462.17   41.57   1
  -8   6  -3  873.83   71.10   2
   8  -6   3  891.85   69.23   1
   8  -6   3  977.97   63.63   4
   9  -6   3  184.72   27.76   1
  -9   6  -3  155.17   24.77   2
   9  -6   3  172.01   24.37   4
  10  -6   3  432.08   41.86   1
  10  -6   3  417.52   37.93   4
 -10   6  -3  460.71   43.75   2
  11  -6   3   41.85   16.86   1
  11  -6   3   31.79   14.44   4
 -11   6  -3   35.40   16.94   2
  12  -6   3  276.05   35.16   1
 -12   6  -3  246.28   35.73   2
  12  -6   3  291.84   32.11   4
 -13   6  -3   20.30   16.35   2
  13  -6   3   21.81   11.17   4
  13  -6   3  -22.33   11.14   1
  14  -6   3  182.17   25.32   4
  14  -6   3  152.13   27.63   1
 -14   6  -3  176.28   31.66   2
  15  -6   3  185.51   31.94   1
  15  -6   3  253.54   30.65   4
 -15   6  -3  186.24   34.44   2
  14   5  -3  209.71   33.52   3
  13   5  -3  104.94   22.71   3
  12   5  -3  144.52   26.59   3
  11   5  -3  -10.00   10.66   3
 -11  -5   3   20.51   13.68   1
  10   5  -3   12.31   15.12   3
 -10  -5   3   24.42   14.29   1
   9   5  -3 1441.76  114.15   3
  -9  -5   3 1493.53   98.69   1
  -8  -5   3   41.13   14.49   1
   8   5  -3   54.87   17.08   3
   7   5  -3    8.29   13.31   3
  -7  -5   3   38.44   16.57   1
  -7  -5   3   22.11   11.55   3
  -6  -5   3  397.67   32.83   3
   6   5  -3  289.10   32.38   3
   6   5  -3  294.65   27.18   2
  -6  -5   3  347.58   33.81   1
   5   5  -3   68.55   10.43   2
  -5  -5   3   79.39   13.60   3
  -5  -5   3   48.67   17.91   1
   5   5  -3   81.43   15.96   3
   4   5  -3   15.08    6.07   2
  -4  -5   3   35.50   15.89   1
   4   5  -3    3.66    8.05   3
   3   5  -3   12.24    5.84   2
   3   5  -3   19.76    9.04   3
  -3  -5   3   25.91   16.82   1
   2   5  -3 1422.15   96.60   3
   2   5  -3 1206.89   91.33   2
  -2  -5   3 1363.58   93.77   1
   1   5  -3   13.68    6.42   2
  -1  -5   3   36.05   14.68   1
   1   5  -3    9.86    6.71   3
   0  -5   3   15.46   11.64   1
   0   5  -3    8.06    5.91   2
   0   5  -3   -3.18    4.56   3
   1  -5   3  304.67   29.52   1
  -1   5  -3  279.21   24.46   2
  -1   5  -3  290.35   23.80   3
  -2   5  -3  382.65   32.06   2
  -2   5  -3  470.61   31.84   3
   2  -5   3  367.55   34.71   1
   3  -5   3  496.18   41.81   1
  -3   5  -3  564.21   41.33   2
   4  -5   3    1.26    8.70   1
  -4   5  -3   10.97    7.73   2
   5  -5   3 1373.76   91.52   1
  -5   5  -3 1301.34   95.22   2
   6  -5   3  396.37   32.76   4
   6  -5   3  386.92   35.73   1
  -6   5  -3  409.75   35.06   2
   7  -5   3   21.97   10.46   4
  -7   5  -3   49.42   13.85   2
   7  -5   3   24.09   12.19   1
  -8   5  -3  164.87   23.46   2
   8  -5   3  176.75   23.14   4
   8  -5   3  185.45   26.06   1
   9  -5   3  505.26   40.09   4
   9  -5   3  517.36   44.31   1
  -9   5  -3  456.22   44.57   2
 -10   5  -3  352.68   39.01   2
  10  -5   3  398.90   35.10   4
  10  -5   3  462.99   40.20   1
  11  -5   3   36.62   13.81   4
  11  -5   3   46.06   17.37   1
 -11   5  -3   34.41   15.50   2
  12  -5   3  776.37   64.25   1
 -12   5  -3  811.84   69.61   2
  12  -5   3  842.98   58.83   4
 -13   5  -3  301.60   40.68   2
  13  -5   3  321.30   34.23   4
  13  -5   3  384.98   40.44   1
 -14   5  -3  131.94   29.22   2
  14  -5   3  169.29   27.32   1
  14  -5   3  154.83   23.08   4
  15  -5   3   64.70   16.58   4
  15  -5   3   13.44   17.30   1
 -15   5  -3   68.31   21.25   2
  14   4  -3  216.50   33.17   3
  13   4  -3    7.84   12.89   3
  12   4  -3  176.80   29.59   3
 -11  -4   3  353.63   31.46   1
  11   4  -3  338.50   37.92   3
 -10  -4   3    5.92   11.42   1
  10   4  -3   -2.02   11.74   3
  -9  -4   3  164.53   22.31   1
   9   4  -3  167.07   26.77   3
  -8  -4   3   10.39   11.07   1
   8   4  -3   -5.16   11.98   3
  -7  -4   3 1680.59  120.97   3
  -7  -4   3 1552.52  107.39   1
   7   4  -3 1720.07  123.57   3
  -6  -4   3   25.11    9.68   3
  -6  -4   3   43.58   14.41   1
   6   4  -3   25.16   11.30   3
   6   4  -3   19.80    6.95   2
  -5  -4   3  150.02   17.88   3
  -5  -4   3  160.53   22.74   1
   5   4  -3  121.74   14.22   2
   5   4  -3  156.24   20.69   3
   4   4  -3 2792.07  178.89   3
  -4  -4   3 2324.72  160.49   1
   4   4  -3 2436.10  169.28   2
   3   4  -3   19.34    5.92   2
   3   4  -3   24.39    8.86   3
  -3  -4   3   18.22   15.42   1
   2   4  -3    6.04    4.71   2
  -2  -4   3   10.28   13.61   1
   2   4  -3    3.13    5.80   3
  -1  -4   3   17.26   13.35   1
   1   4  -3    7.86    5.06   2
   1   4  -3   12.36    6.06   3
   0   4  -3  887.93   61.03   2
   0  -4   3  880.21   62.74   1
   0   4  -3  842.98   62.92   3
  -1   4  -3  258.84   22.96   2
  -1   4  -3  282.03   23.41   3
   1  -4   3  307.39   27.87   1
  -2   4  -3   38.70    7.24   3
  -2   4  -3   37.07    8.60   2
   2  -4   3   72.09   14.72   1
  -3   4  -3 2005.09  136.31   2
   3  -4   3 1983.24  128.05   1
   4  -4   3  202.99   22.97   1
  -4   4  -3  201.58   20.12   2
   5  -4   3  446.12   36.78   1
  -5   4  -3  444.66   36.37   2
   5  -4   3  448.71   33.51   4
  -6   4  -3    1.38    7.99   2
   6  -4   3    4.99    8.19   4
   6  -4   3    5.96    8.70   1
   7  -4   3 1041.79   66.94   4
   7  -4   3 1046.08   73.69   1
  -7   4  -3 1049.63   77.76   2
  -8   4  -3  206.69   25.25   2
   8  -4   3  250.52   27.56   1
   8  -4   3  163.37   22.39   4
   9  -4   3   -1.73   10.84   1
  -9   4  -3   -6.10   10.63   2
   9  -4   3   10.86    8.78   4
 -10   4  -3  240.09   31.69   2
  10  -4   3  281.57   32.22   1
  10  -4   3  282.84   28.27   4
  11  -4   3   11.56   12.80   1
  11  -4   3   -0.76    8.48   4
 -11   4  -3   11.29   14.17   2
 -12   4  -3  699.75   60.62   2
  12  -4   3  671.62   55.53   1
  12  -4   3  648.78   48.87   4
  13  -4   3   35.72   12.37   4
  13  -4   3   46.53   18.38   1
 -13   4  -3   36.59   17.89   2
  14  -4   3  244.64   29.71   4
  14  -4   3  319.43   37.13   1
 -14   4  -3  300.95   38.53   2
 -15   4  -3  152.11   28.15   2
  15   3  -3   -4.20   13.03   3
  14   3  -3  201.40   32.36   3
  13   3  -3  101.03   21.67   3
 -12  -3   3   27.15   12.73   1
  12   3  -3   40.46   15.15   3
 -11  -3   3   10.44   10.54   1
  11   3  -3    6.83   11.65   3
  10   3  -3  355.65   40.59   3
 -10  -3   3  472.39   35.30   1
   9   3  -3  883.30   73.05   3
  -9  -3   3  887.46   61.92   1
   8   3  -3    1.71    9.57   3
  -8  -3   3    4.09    9.36   1
  -7  -3   3   60.93   14.16   1
   7   3  -3   33.52   11.82   3
   6   3  -3  266.46   28.17   3
   6   3  -3  251.95   22.52   2
  -6  -3   3  318.84   26.19   1
   5   3  -3  531.64   42.28   3
  -5  -3   3  539.28   39.07   1
   5   3  -3  406.46   35.67   2
   4   3  -3  217.43   22.87   3
   4   3  -3  188.90   18.60   2
  -4  -3   3  279.36   25.72   1
   3   3  -3  713.38   54.22   2
  -3  -3   3  731.10   56.46   1
   3   3  -3  906.95   59.95   3
   2   3  -3 1954.25  135.84   3
  -2  -3   3 1802.03  124.60   1
   2   3  -3 2038.72  129.64   2
   1   3  -3   12.42    4.76   2
   1   3  -3   19.64    6.35   3
  -1  -3   3   15.15   10.96   1
   0   3  -3   89.65   10.88   2
   0  -3   3  136.81   18.42   1
   0   3  -3  105.28   12.15   3
  -1   3  -3  732.64   50.87   3
  -1   3  -3  673.02   48.74   2
   1  -3   3  663.52   49.25   1
   2  -3   3 2578.91  175.93   1
  -2   3  -3 2984.44  195.66   3
  -2   3  -3 2945.26  190.58   2
   3  -3   3  126.04   16.60   1
  -3   3  -3  149.32   15.13   2
  -3   3  -3  114.50   11.12   3
   4  -3   3   79.26   12.33   4
  -4   3  -3   39.31    7.00   3
  -4   3  -3   72.54   11.54   2
   4  -3   3   66.42   13.26   1
   5  -3   3 2434.65  152.47   1
  -5   3  -3 2331.59  166.22   3
  -5   3  -3 2396.53  165.03   2
   5  -3   3 2500.73  137.15   4
   6  -3   3   60.15   12.24   4
  -6   3  -3   49.29    7.50   3
   6  -3   3   71.49   14.16   1
  -6   3  -3   51.18   11.68   2
  -7   3  -3  294.47   27.53   2
   7  -3   3  270.31   27.94   1
   7  -3   3  266.68   25.09   4
  -7   3  -3  259.33   22.83   3
   8  -3   3   31.28   11.32   4
   8  -3   3   43.02   13.79   1
  -8   3  -3   32.77   13.23   2
  -8   3  -3   32.65    7.72   3
   9  -3   3  527.13   37.88   4
  -9   3  -3  463.86   43.17   2
   9  -3   3  474.47   41.58   1
  10  -3   3  925.01   66.80   1
  10  -3   3  901.02   59.39   4
 -10   3  -3  870.14   71.30   2
 -11   3  -3   45.82   16.27   2
  11  -3   3   33.67   14.71   1
  11  -3   3   56.27   12.85   4
  12  -3   3  746.39   58.74   1
 -12   3  -3  762.13   64.13   2
  12  -3   3  725.20   52.05   4
 -13   3  -3  100.27   22.35   2
  13  -3   3  103.41   21.67   1
  13  -3   3   66.23   15.83   4
  14  -3   3  333.77   37.23   1
 -14   3  -3  298.99   37.33   2
  14  -3   3  278.45   29.67   4
 -15   3  -3   54.55   16.75   2
  15   2  -3   53.19   16.36   3
  14   2  -3  366.37   40.66   3
 -13  -2   3    9.00   10.84   1
  13   2  -3   11.28   12.45   3
 -12  -2   3  351.55   31.04   1
  12   2  -3  339.72   36.98   3
 -11  -2   3  579.61   44.75   1
  11   2  -3  595.13   54.21   3
 -10  -2   3   73.22   15.37   1
  10   2  -3   27.57   14.13   3
   9   2  -3   40.35   14.01   3
  -9  -2   3   26.34   12.03   1
  -8  -2   3    2.48    7.95   1
   8   2  -3    7.79   10.18   3
  -7  -2   3 1476.24   97.60   1
   7   2  -3 1567.92  113.23   3
  -6  -2   3  -10.75    6.78   1
   6   2  -3    2.36    7.89   3
   6   2  -3    7.21    4.99   2
  -5  -2   3  295.45   23.67   1
   5   2  -3  239.29   20.46   2
   5   2  -3  232.74   24.85   3
  -4  -2   3 1517.51   94.39   1
   4   2  -3 1416.52  105.51   3
  -3  -2   3  359.90   27.39   1
   3   2  -3  305.65   26.45   3
   3   2  -3  252.44   22.36   2
   2   2  -3   68.98   11.11   3
  -2  -2   3  127.79   17.43   1
  -1  -2   3  229.56   24.99   1
   1   2  -3  274.85   22.04   3
   1   2  -3  256.70   18.89   2
   0  -2   3 1851.73  113.81   1
   0   2  -3 1754.13  124.01   3
   0   2  -3 1724.31  118.94   2
   1  -2   3  696.15   46.93   1
  -1   2  -3  621.11   49.22   3
  -1   2  -3  678.35   46.62   2
   2  -2   3  188.58   18.49   1
  -2   2  -3  156.23   15.52   3
  -2   2  -3  196.27   16.30   2
  -3   2  -3 1281.77   85.00   2
   3  -2   3 1249.47   79.51   1
  -3   2  -3 1151.73   85.24   3
   4  -2   3  660.52   41.75   4
   4  -2   3  685.02   46.50   1
  -4   2  -3  600.94   47.47   3
  -4   2  -3  705.70   49.02   2
   5  -2   3  203.63   19.26   4
  -5   2  -3  177.89   17.68   3
  -5   2  -3  226.62   20.83   2
   5  -2   3  227.39   21.18   1
   6  -2   3   51.77   12.58   1
  -6   2  -3   56.72    8.72   3
  -6   2  -3   80.34   12.92   2
   6  -2   3   49.34   10.86   4
   7  -2   3 1855.70  111.24   1
   7  -2   3 1698.19   99.33   4
  -7   2  -3 1670.67  120.45   3
  -7   2  -3 1613.07  120.01   2
  -8   2  -3   96.22   13.32   3
   8  -2   3  112.46   15.61   4
   8  -2   3  103.67   16.73   1
  -8   2  -3  105.58   17.63   2
  -9   2  -3    6.53    6.33   3
  -9   2  -3    2.44   10.79   2
   9  -2   3    2.22    8.27   4
   9  -2   3    9.07    9.66   1
  10  -2   3  306.57   26.06   4
 -10   2  -3  263.43   31.59   2
 -10   2  -3  289.17   27.93   3
  10  -2   3  311.37   29.18   1
  11  -2   3  327.92   30.82   1
  11  -2   3  320.64   27.18   4
 -11   2  -3  314.79   34.38   2
  12  -2   3  368.70   32.87   1
  12  -2   3  315.61   27.94   4
 -12   2  -3  310.95   35.69   2
  13  -2   3  110.83   19.33   4
 -13   2  -3  120.90   23.35   2
  13  -2   3   96.35   19.92   1
 -14   2  -3  293.33   35.97   2
  16   1  -3  242.63   33.35   3
  15   1  -3   24.54   14.60   3
 -14  -1   3  254.86   25.51   1
  14   1  -3  253.24   34.29   3
  13   1  -3   95.95   20.13   3
 -13  -1   3  136.10   19.57   1
 -12  -1   3  304.29   28.00   1
  12   1  -3  305.45   34.16   3
  11   1  -3   16.59   12.01   3
 -11  -1   3   24.61   11.66   1
 -10  -1   3  607.52   44.80   1
  10   1  -3  604.40   53.38   3
   9   1  -3  301.77   32.22   3
  -9  -1   3  328.55   27.80   1
   8   1  -3   21.98   10.88   3
  -8  -1   3   16.82    8.64   1
  -7  -1   3  493.05   36.33   1
   7   1  -3  478.01   37.54   2
   7   1  -3  518.94   43.38   3
   6   1  -3  182.44   16.69   2
   6   1  -3  183.96   21.34   3
  -6  -1   3  191.86   17.75   1
   5   1  -3 2447.47  166.94   2
   5   1  -3 2465.09  175.69   3
  -5  -1   3 2567.72  154.14   1
   4   1  -3  124.38   15.51   3
  -4  -1   3  141.48   14.80   1
   4   1  -3  119.16   11.04   2
  -3  -1   3  222.78   18.55   1
   3   1  -3  158.76   17.92   3
  -2  -1   3 5191.50  303.59   1
   2   1  -3 4821.46  343.43   3
   1   1  -3  815.65   51.94   2
  -1  -1   3  659.34   51.83   1
   1   1  -3  840.53   56.61   3
   0  -1   3   48.08   10.96   1
   0   1  -3   36.62    7.94   3
   0   1  -3   22.84    4.52   2
   1  -1   3   65.36   11.32   1
  -1   1  -3   32.88    8.11   3
  -1   1  -3   46.31    6.30   2
  -2   1  -3 5401.51  350.63   2
  -2   1  -3 5101.07  360.72   3
   2  -1   3 5349.74  319.46   1
  -3   1  -3  914.77   71.45   3
   3  -1   3 1081.37   65.89   1
   3  -1   3 1044.63   59.02   4
  -3   1  -3 1033.97   70.89   2
  -4   1  -3   18.10    5.81   3
   4  -1   3   43.26    8.66   1
  -4   1  -3   45.84    8.59   2
   4  -1   3   32.23    7.68   4
  -5   1  -3 3862.92  266.80   3
  -5   1  -3 4203.31  261.17   2
   5  -1   3 3772.13  236.74   1
   5  -1   3 3683.51  212.01   4
  -6   1  -3   54.97    9.52   3
   6  -1   3   36.71    9.34   4
   6  -1   3   56.31   10.96   1
  -6   1  -3   52.60   11.51   2
  -7   1  -3  353.30   31.61   2
   7  -1   3  415.50   30.21   1
  -7   1  -3  344.66   29.78   3
   7  -1   3  312.32   25.96   4
   8  -1   3  265.99   22.58   4
  -8   1  -3  234.40   23.75   3
   8  -1   3  282.19   24.73   1
  -8   1  -3  233.17   25.56   2
  -9   1  -3 1154.82   80.31   3
  -9   1  -3 1026.74   79.05   2
   9  -1   3 1032.77   65.64   4
   9  -1   3 1032.73   72.45   1
 -10   1  -3  971.15   70.75   3
  10  -1   3  910.83   64.84   1
 -10   1  -3  796.11   69.61   2
  10  -1   3  968.03   59.32   4
  11  -1   3   15.43    9.33   4
 -11   1  -3   46.49   12.90   3
 -11   1  -3   30.29   13.08   2
  11  -1   3   44.56   13.76   1
 -12   1  -3   98.46   16.89   3
  12  -1   3   57.75   13.11   4
  12  -1   3   63.94   16.53   1
 -12   1  -3   81.20   18.92   2
 -13   1  -3   38.40   14.09   2
 -14   1  -3  329.10   38.30   2
  15   0  -3  101.15   22.62   3
  14   0  -3  521.71   49.82   3
 -14   0   3  491.39   40.32   1
 -13   0   3   15.46   10.51   1
  13   0  -3   10.00   12.49   3
  12   0  -3  543.01   49.12   3
 -12   0   3  492.24   40.19   1
 -11   0   3  270.90   25.12   1
  11   0  -3  253.92   32.18   3
  10   0  -3  337.78   33.73   3
 -10   0   3  319.93   28.47   1
   9   0  -3   20.90   11.90   3
  -9   0   3   38.85   10.83   1
  -8   0   3  100.75   14.42   1
   8   0  -3   85.51   17.01   3
  -7   0   3 1303.37   83.41   2
   7   0  -3 1207.25   90.23   3
  -7   0   3 1111.11   77.54   1
  -6   0   3  163.30   14.01   2
  -6   0   3  172.64   17.12   1
   6   0  -3  155.01   19.40   3
  -5   0   3  585.12   40.75   1
   5   0  -3  597.29   47.03   3
  -5   0   3  607.13   41.70   2
  -4   0   3   56.97    6.81   2
  -4   0   3   86.92   10.41   1
   4   0  -3   65.58   11.05   3
   3   0  -3 1152.06   80.74   3
  -3   0   3 1087.43   70.55   1
  -2   0   3 1354.83   85.12   1
   2   0  -3 1380.61   96.93   3
   1   0  -3    4.71    5.00   3
  -1   0   3    5.88    6.02   1
   0   0   3 1160.08   74.25   1
   0   0  -3 1131.63   84.17   3
   0   0  -3 1250.59   79.06   2
  -1   0  -3  478.16   36.05   2
   1   0   3  552.20   35.33   1
  -1   0  -3  521.64   38.46   3
   2   0   3 1046.15   64.53   1
  -2   0  -3 1040.56   70.24   2
  -2   0  -3  986.69   71.94   3
   3   0   3   45.41    7.27   1
  -3   0  -3   37.88    7.27   2
  -3   0  -3   48.04    7.26   3
   3   0   3   35.33    6.30   4
  -4   0  -3 2518.12  184.30   3
   4   0   3 2739.53  146.01   4
  -4   0  -3 2545.88  179.61   2
   4   0   3 2873.34  163.16   1
   5   0   3  364.17   27.18   1
  -5   0  -3  362.50   29.79   3
   5   0   3  359.67   24.69   4
  -5   0  -3  383.18   29.80   2
   6   0   3  235.48   21.43   1
   6   0   3  231.25   19.09   4
  -6   0  -3  254.12   23.19   2
  -6   0  -3  262.26   22.98   3
  -7   0  -3 3910.60  232.53   1
  -7   0  -3 3974.84  266.31   3
  -7   0  -3 3638.67  258.96   2
  -8   0  -3   89.84   10.64   1
  -8   0  -3   76.63   13.00   3
  -8   0  -3   75.65   13.69   2
  -9   0  -3    3.02    5.75   1
  -9   0  -3    4.45    8.02   3
  -9   0  -3   -3.18    8.17   2
 -10   0  -3  484.45   35.11   1
 -10   0  -3  512.67   43.20   3
 -10   0  -3  473.96   42.47   2
 -11   0  -3  510.47   42.68   3
 -11   0  -3  455.30   33.58   1
 -11   0  -3  410.56   41.20   2
 -12   0  -3  172.63   23.76   3
 -12   0  -3  172.68   25.39   2
  13   0   3   -0.22   17.44   2
 -13   0  -3   19.61   11.00   3
  14   0   3  507.07   53.10   2
 -15   1   3   24.84   13.79   1
  14  -1  -3  199.13   29.88   3
 -14   1   3  215.59   25.23   1
  13  -1  -3   43.74   13.62   3
 -13   1   3   35.02   12.88   1
 -12   1   3  556.03   42.92   1
  12  -1  -3  572.98   51.41   3
  11  -1  -3   10.86    9.63   3
 -11   1   3   -1.54    8.93   1
  10  -1  -3  155.19   22.81   3
 -10   1   3  174.44   19.98   1
  -9   1   3  664.51   50.44   1
   9  -1  -3  719.72   59.62   3
  -9   1   3  796.68   53.99   2
   8  -1  -3  247.92   25.81   3
  -8   1   3  233.35   20.71   2
  -8   1   3  211.98   20.56   1
  -7   1   3  198.81   17.54   2
   7  -1  -3  188.36   21.65   3
  -7   1   3  183.28   18.10   1
   6  -1  -3  164.51   19.06   3
  -6   1   3  173.36   15.35   2
  -6   1   3  162.65   15.86   1
  -5   1   3 3193.03  211.11   2
  -5   1   3 3219.97  193.14   1
   5  -1  -3 3077.36  220.21   3
  -4   1   3   15.39    6.05   1
   4  -1  -3   20.56    7.41   3
  -4   1   3   12.86    4.00   2
   3  -1  -3   48.29    8.81   3
  -3   1   3   56.90    7.96   1
  -3   1   3   35.26    5.15   2
  -2   1   3 6067.73  400.99   2
   1  -1  -3  561.92   41.89   3
  -1   1   3  520.77   37.14   2
   0  -1  -3  209.38   18.92   3
   0   1   3  189.97   14.79   1
   0   1   3  234.95   16.47   2
   1   1   3   21.52    4.83   1
  -1  -1  -3   29.20    5.74   3
   1   1   3   24.04    5.55   2
   2   1   3 3107.02  228.09   2
   2   1   3 3663.04  205.51   1
  -2  -1  -3 3463.59  234.08   3
  -3  -1  -3    9.50    5.63   2
   3   1   3    8.26    4.24   1
  -3  -1  -3   16.74    5.23   3
   3   1   3    7.67    3.95   4
  -4  -1  -3   10.01    5.86   2
  -4  -1  -3   21.20    6.61   3
  -5  -1  -3  512.71   38.04   2
  -5  -1  -3  470.36   38.76   3
  -5  -1  -3  507.99   32.10   1
  -6  -1  -3  102.51   13.81   2
  -6  -1  -3  113.58   14.23   3
  -6  -1  -3   97.33    9.94   1
  -7  -1  -3  830.68   60.69   2
  -7  -1  -3  834.67   52.36   1
  -7  -1  -3  791.96   61.86   3
  -8  -1  -3   88.64   10.57   1
  -8  -1  -3  106.41   15.22   3
  -8  -1  -3  101.33   15.21   2
  -9  -1  -3 2147.85  150.20   2
  -9  -1  -3 2127.16  154.49   3
  -9  -1  -3 2190.91  132.95   1
 -10  -1  -3   55.42   14.83   3
  10   1   3   61.43   19.44   2
 -10  -1  -3   68.26   10.20   1
 -11  -1  -3  147.50   21.90   3
  11   1   3  147.26   26.62   2
 -12  -1  -3   82.58   18.13   3
  12   1   3   91.04   21.89   2
  13   1   3  100.25   24.54   2
 -13  -1  -3  122.06   21.11   3
 -14  -1  -3  239.11   31.15   3
 -15  -1  -3   46.17   17.12   3
 -15   2   3  283.87   27.66   1
 -14   2   3  365.74   32.54   1
  13  -2  -3   48.07   13.45   3
 -13   2   3   50.07   14.17   1
  12  -2  -3  358.38   35.91   3
 -12   2   3  333.05   30.19   1
  11  -2  -3   77.40   17.45   3
 -11   2   3   99.21   16.69   1
  10  -2  -3  655.67   52.74   3
 -10   2   3  574.44   44.63   1
  -9   2   3  167.87   18.88   1
   9  -2  -3  143.26   21.54   3
  -9   2   3  168.01   18.10   2
  -8   2   3  835.74   57.50   1
  -8   2   3  876.66   62.17   2
   8  -2  -3  837.82   66.13   3
  -7   2   3 2587.02  172.76   2
  -7   2   3 2540.42  157.60   1
   7  -2  -3 2511.77  180.05   3
  -6   2   3  122.55   13.13   2
  -6   2   3  118.22   13.80   1
   6  -2  -3  123.18   16.29   3
  -5   2   3  240.31   19.99   1
  -5   2   3  229.23   19.79   2
   5  -2  -3  244.76   23.00   3
  -4   2   3  155.46   14.09   1
  -4   2   3  137.45   13.64   2
   4  -2  -3  151.50   16.32   3
   3  -2  -3 1611.85  106.89   3
  -3   2   3 1566.32  101.53   2
  -3   2   3 1328.26   92.52   1
  -2   2   3   37.55    5.95   2
   2  -2  -3   40.32    9.14   3
  -2   2   3   34.48    6.25   1
   1  -2  -3  111.85   12.67   3
  -1   2   3   82.96    8.69   1
  -1   2   3  100.83   10.23   2
   0   2   3 6581.37  435.79   2
   1   2   3  162.13   14.40   2
  -1  -2  -3  144.74   13.90   3
   2   2   3  351.90   27.75   2
  -2  -2  -3  355.83   27.73   3
   3   2   3  421.10   32.47   2
  -3  -2  -3  392.60   31.77   3
  -4  -2  -3 2629.30  187.28   3
  -4  -2  -3 2795.27  162.10   1
   4   2   3 2669.25  183.39   2
  -5  -2  -3  998.64   76.20   3
   5   2   3 1043.47   76.25   2
  -5  -2  -3 1100.67   64.51   1
  -6  -2  -3  220.70   16.72   1
  -6  -2  -3  236.29   22.89   3
   6   2   3  235.08   24.75   2
   7   2   3 1915.87  139.23   2
  -7  -2  -3 2042.67  120.82   1
  -7  -2  -3 1966.29  140.71   3
  -8  -2  -3   34.18    6.62   1
  -8  -2  -3   21.16    9.00   3
   8   2   3   26.77   13.43   2
  -9  -2  -3   50.29   13.22   3
   9   2   3   38.24   14.68   2
  -9  -2  -3   48.59    8.36   1
 -10  -2  -3  223.93   20.59   1
 -10  -2  -3  292.87   30.03   3
  10   2   3  279.71   33.04   2
  11   2   3  590.60   53.49   2
 -11  -2  -3  583.09   51.26   3
  12   2   3  635.44   57.40   2
 -12  -2  -3  620.63   54.87   3
 -13  -2  -3   19.99   12.62   3
  13   2   3   20.64   14.33   2
 -14  -2  -3  316.08   36.07   3
 -15  -2  -3   50.62   17.68   3
 -16  -2  -3  166.13   28.87   3
 -16   3   3   59.50   15.16   1
 -15   3   3   36.41   13.82   1
 -14   3   3   65.42   15.77   1
 -13   3   3  175.07   22.76   1
 -12   3   3  548.70   42.54   1
  11  -3  -3   99.50   17.57   3
 -11   3   3   88.46   16.45   1
 -10   3   3  372.23   33.50   2
 -10   3   3  359.25   31.07   1
  10  -3  -3  390.60   36.57   3
   9  -3  -3  524.15   44.15   3
  -9   3   3  463.42   37.40   1
  -9   3   3  521.77   41.23   2
  -8   3   3  588.19   45.42   1
   8  -3  -3  714.95   53.17   3
  -8   3   3  648.90   49.92   2
  -7   3   3  186.59   18.49   1
  -7   3   3  169.12   18.21   2
   7  -3  -3  203.55   21.43   3
  -6   3   3  169.43   17.22   2
  -6   3   3  166.06   16.56   1
   6  -3  -3  177.26   19.00   3
  -5   3   3 1936.98  127.49   2
  -5   3   3 1684.72  115.48   1
   5  -3  -3 1975.36  132.55   3
   4  -3  -3    5.13    6.99   3
  -4   3   3    3.61    5.09   1
  -4   3   3    5.61    5.32   2
  -3   3   3  378.02   30.45   1
  -3   3   3  511.53   34.20   2
   3  -3  -3  479.94   36.97   3
  -2   3   3 1507.56  103.47   2
   2  -3  -3 1538.45  107.88   3
  -1   3   3 2056.10  133.96   1
  -1   3   3 2133.70  149.02   2
   1  -3  -3 2454.47  153.81   3
   0   3   3  296.27   19.04   1
   0   3   3  275.06   22.73   2
   1   3   3 1574.55  101.91   2
  -1  -3  -3 1566.01  103.97   3
  -1  -3  -3 1421.12   81.09   4
  -1  -3  -3 1385.84   90.43   1
   2   3   3 3373.44  215.14   2
  -2  -3  -3 3022.36  220.13   3
  -3  -3  -3    4.76    5.25   3
   3   3   3   13.11    6.88   2
  -4  -3  -3  130.60   15.26   3
   4   3   3  152.75   16.53   2
  -4  -3  -3  129.49    9.96   1
   5   3   3  808.73   60.11   2
  -5  -3  -3  787.22   60.35   3
  -5  -3  -3  811.67   49.84   1
  -6  -3  -3  741.46   47.62   1
  -6  -3  -3  718.60   57.97   3
   6   3   3  812.07   58.85   2
  -7  -3  -3  326.60   30.60   3
   7   3   3  337.89   31.81   2
  -7  -3  -3  340.31   23.19   1
   8   3   3   51.65   14.43   2
  -8  -3  -3   44.52   11.99   3
  -8  -3  -3   64.66    8.14   1
  -9  -3  -3 1115.39   69.55   1
   9   3   3 1078.45   83.97   2
  -9  -3  -3 1094.53   83.73   3
  10   3   3    9.47   13.31   2
 -10  -3  -3   25.90   13.06   3
 -11  -3  -3  263.79   29.70   3
  11   3   3  240.23   31.53   2
  12   3   3  372.89   39.53   2
 -12  -3  -3  366.35   37.84   3
 -13  -3  -3  672.42   59.58   3
 -14  -3  -3  358.82   38.86   3
 -15  -3  -3   10.09   14.78   3
 -16  -3  -3  268.22   37.19   3
 -15   4   3  461.95   39.33   1
 -14   4   3  219.12   26.15   1
 -13   4   3   37.69   13.17   1
 -12   4   3  367.92   32.43   1
 -11   4   3   45.71   13.84   1
 -10   4   3  260.00   24.38   1
  10  -4  -3  237.27   26.88   3
 -10   4   3  213.79   24.99   2
  -9   4   3    0.59    9.23   1
  -9   4   3    9.25    9.62   2
   9  -4  -3   -3.87    8.48   3
   8  -4  -3 1056.44   76.53   3
  -8   4   3  974.01   66.89   1
  -8   4   3  979.95   73.70   2
  -7   4   3 1796.01  129.50   2
  -7   4   3 1923.44  117.75   1
   7  -4  -3 1878.81  133.71   3
   6  -4  -3  406.96   34.85   3
  -6   4   3  428.56   31.15   1
  -6   4   3  410.76   33.76   2
  -5   4   3  224.33   19.90   2
   5  -4  -3  229.91   21.49   3
  -5   4   3  162.49   17.47   1
  -4   4   3   48.24    8.56   1
  -4   4   3   54.66    9.91   2
   4  -4  -3   38.88   10.10   3
  -3   4   3 2690.10  165.46   1
  -3   4   3 2764.43  183.19   2
   3  -4  -3 2690.81  188.82   3
  -2   4   3  632.85   45.91   2
   2  -4  -3  660.99   46.78   3
  -2   4   3  599.42   40.80   1
  -1   4   3 1059.81   74.06   2
   1  -4  -3 1024.91   60.45   4
   1  -4  -3 1082.90   67.46   1
   1  -4  -3 1064.40   74.70   3
   0  -4  -3 2784.78  175.50   1
   0   4   3 2951.43  194.69   2
   0  -4  -3 2898.83  157.36   4
   0  -4  -3 2923.05  198.89   3
  -1  -4  -3  632.26   46.17   3
  -1  -4  -3  586.14   40.67   1
   1   4   3  659.45   46.38   2
  -2  -4  -3  276.81   22.51   3
  -2  -4  -3  227.21   19.43   1
   2   4   3  261.21   22.65   2
  -3  -4  -3   92.14   12.03   3
   3   4   3   96.30   13.21   2
  -3  -4  -3   60.44    9.07   1
  -4  -4  -3 6171.55  412.95   3
   4   4   3 5920.94  401.74   2
  -4  -4  -3 5933.96  360.27   1
   5   4   3  398.57   34.79   2
  -5  -4  -3  444.79   27.61   1
  -5  -4  -3  416.55   35.17   3
   6   4   3  104.18   16.12   2
  -6  -4  -3  108.19   15.37   3
  -6  -4  -3  105.09    9.40   1
  -7  -4  -3  650.87   42.27   1
  -7  -4  -3  651.52   52.49   3
   7   4   3  669.31   52.76   2
   8   4   3   28.20   11.31   2
  -8  -4  -3   27.10   10.71   3
  -8  -4  -3   32.72    6.24   1
  -9  -4  -3  172.49   22.40   3
   9   4   3  155.00   23.09   2
 -10  -4  -3    0.64    9.32   3
  10   4   3   12.95   11.31   2
 -11  -4  -3 1030.65   80.65   3
  11   4   3  970.27   79.11   2
  12   4   3  346.56   37.14   2
 -12  -4  -3  359.99   37.28   3
 -13  -4  -3   -2.54   11.49   3
 -14  -4  -3  226.27   31.43   3
 -15  -4  -3   73.72   20.28   3
 -16  -4  -3  143.48   27.46   3
  15  -5  -3   81.56   16.76   4
  15  -5  -3   82.37   21.91   1
  14  -5  -3   73.57   15.43   4
  14  -5  -3   69.41   21.26   1
 -13   5   3  223.49   26.49   1
 -12   5   3  362.38   32.22   1
 -11   5   3    0.11   10.14   2
 -11   5   3   -3.19   10.02   1
 -10   5   3  361.72   30.68   1
 -10   5   3  327.07   34.07   2
  -9   5   3  256.48   24.17   1
  -9   5   3  222.71   25.68   2
   8  -5  -3  602.96   51.07   3
  -8   5   3  706.53   46.40   1
  -8   5   3  586.70   50.55   2
   7  -5  -3  121.98   16.80   3
  -7   5   3  147.47   18.31   2
  -7   5   3  132.86   16.08   1
   6  -5  -3  306.83   29.31   3
  -6   5   3  332.42   26.61   1
  -6   5   3  362.02   30.10   2
   5  -5  -3  561.98   49.09   3
  -5   5   3  742.45   49.85   2
  -5   5   3  625.26   43.89   1
  -4   5   3   56.52    9.59   1
  -4   5   3   53.02   10.69   2
   4  -5  -3   50.39    9.94   3
  -3   5   3  192.88   19.32   2
   3  -5  -3  215.78   19.86   1
   3  -5  -3  196.35   18.28   4
   3  -5  -3  216.55   18.55   3
   2  -5  -3   10.58    7.35   1
  -2   5   3   13.17    6.84   2
   2  -5  -3    2.25    4.75   3
   2  -5  -3   11.63    6.61   4
   1  -5  -3 2538.74  156.53   1
   1  -5  -3 2413.54  174.92   3
  -1   5   3 2631.90  172.39   2
   1  -5  -3 2570.02  140.43   4
   0   5   3   10.86    6.40   2
   0  -5  -3   16.00    6.48   1
   0  -5  -3    8.41    5.36   3
   0  -5  -3   10.04    5.28   4
  -1  -5  -3  499.81   34.09   1
  -1  -5  -3  471.57   36.66   3
   1   5   3  462.97   37.21   2
  -2  -5  -3 3985.60  265.80   3
  -2  -5  -3 3593.12  234.55   1
   2   5   3 3978.68  259.53   2
   3   5   3   34.30    9.25   2
  -3  -5  -3   13.38    8.02   1
  -3  -5  -3   11.48    7.08   3
  -4  -5  -3  110.81   12.91   1
  -4  -5  -3  118.96   15.13   3
   4   5   3  110.21   16.00   2
  -5  -5  -3  498.98   40.62   3
   5   5   3  462.33   39.94   2
  -5  -5  -3  499.33   32.86   1
  -6  -5  -3  723.48   60.93   3
   6   5   3  808.23   61.10   2
  -6  -5  -3  844.86   50.71   1
   7   5   3  186.05   23.62   2
  -7  -5  -3  216.93   15.85   1
  -8  -5  -3   -4.72    7.49   3
   8   5   3    9.86   10.49   2
  -9  -5  -3  830.96   65.86   3
   9   5   3  791.99   64.72   2
  10   5   3   -0.97   10.64   2
 -10  -5  -3   19.31   12.05   3
 -11  -5  -3   19.88   12.24   3
  11   5   3    7.54   12.16   2
 -12  -5  -3   62.36   17.48   3
 -13  -5  -3  529.65   50.52   3
 -14  -5  -3  255.08   34.18   3
 -15  -5  -3   18.26   15.53   3
  15  -6  -3  309.23   36.71   1
  15  -6  -3  231.83   28.19   4
  14  -6  -3   73.59   15.50   4
  14  -6  -3   73.80   19.46   1
  13  -6  -3   15.76   13.53   1
  13  -6  -3   79.45   16.18   4
  12  -6  -3   76.56   18.22   1
  12  -6  -3   71.66   14.86   4
 -11   6   3   81.31   18.15   2
  11  -6  -3  106.01   18.74   4
  11  -6  -3  121.88   23.44   1
  10  -6  -3  759.37   58.17   1
 -10   6   3  631.03   59.16   2
  10  -6  -3  793.64   52.68   4
  -9   6   3   44.36   14.95   2
   9  -6  -3   18.40   13.43   1
   9  -6  -3   28.72   11.75   4
   8  -6  -3  884.72   56.23   4
   8  -6  -3  832.16   61.76   1
  -8   6   3  756.35   63.90   2
   7  -6  -3  316.14   31.25   1
   7  -6  -3  358.56   28.93   4
  -7   6   3  342.21   32.08   2
   6  -6  -3  572.36   42.89   1
  -6   6   3  535.00   43.66   2
   6  -6  -3  528.58   38.54   4
   6  -6  -3  505.76   42.00   3
   5  -6  -3  235.42   22.78   1
  -5   6   3  199.66   21.85   2
   5  -6  -3  216.42   21.49   4
   5  -6  -3  190.19   19.23   3
  -4   6   3  126.53   15.94   2
   4  -6  -3  107.86   16.42   1
   4  -6  -3  119.67   15.24   4
   4  -6  -3   91.35   11.62   3
   3  -6  -3 2495.00  146.53   4
  -3   6   3 2685.40  178.66   2
   3  -6  -3 2763.00  164.07   1
   3  -6  -3 2528.26  180.24   3
   2  -6  -3  349.85   27.17   1
   2  -6  -3  284.21   24.52   3
  -2   6   3  287.00   26.68   2
   2  -6  -3  329.20   24.38   4
   1  -6  -3  315.89   26.80   3
   1  -6  -3  298.00   26.73   1
   1  -6  -3  333.25   24.92   4
  -1   6   3  409.12   29.95   2
   0  -6  -3  599.26   44.65   1
   0  -6  -3  616.81   47.60   3
   0   6   3  718.23   49.58   2
  -1  -6  -3  106.98   14.93   1
   1   6   3  154.43   16.76   2
  -1  -6  -3  101.82   13.28   3
  -2  -6  -3   58.63   11.93   1
  -2  -6  -3   63.21   10.71   3
   2   6   3   60.69   12.33   2
   3   6   3  165.26   18.54   2
  -3  -6  -3  124.66   17.48   1
  -3  -6  -3  143.28   16.79   3
   4   6   3 2845.63  191.90   2
  -4  -6  -3 2750.72  196.03   3
  -5  -6  -3   19.83    8.74   1
  -5  -6  -3    7.54    7.44   3
   5   6   3   15.94    9.25   2
  -6  -6  -3    5.61    5.63   1
   6   6   3   14.17    9.14   2
  -6  -6  -3   -1.35    7.25   3
   7   6   3  577.60   48.04   2
  -7  -6  -3  565.93   47.87   3
   8   6   3  418.66   39.14   2
  -8  -6  -3  444.64   39.44   3
  -9  -6  -3  274.73   29.82   3
   9   6   3  271.57   29.61   2
 -10  -6  -3  165.72   24.69   3
  10   6   3  154.34   23.23   2
  11   6   3  549.63   50.03   2
 -11  -6  -3  575.86   51.47   3
 -12  -6  -3  125.89   23.66   3
 -13  -6  -3   36.42   15.79   3
 -14  -6  -3  180.09   30.07   3
 -15  -6  -3  290.10   38.28   3
  14  -7  -3   80.57   16.49   4
  14  -7  -3   87.86   20.83   1
  13  -7  -3  434.14   37.54   4
  13  -7  -3  478.52   43.92   1
  12  -7  -3  214.36   27.83   4
  12  -7  -3  288.06   34.59   1
 -11   7   3   -2.23   13.66   2
  11  -7  -3    4.32    9.37   4
  11  -7  -3    4.14   11.60   1
  10  -7  -3  343.36   33.23   4
  10  -7  -3  354.46   37.41   1
 -10   7   3  343.30   37.13   2
   9  -7  -3    7.97   10.73   1
  -9   7   3   10.49   13.01   2
   9  -7  -3    0.53    8.71   4
   8  -7  -3  137.12   20.21   4
   8  -7  -3  154.41   23.22   1
  -8   7   3  147.18   22.87   2
  -7   7   3   33.41   13.95   2
   7  -7  -3   50.74   15.56   1
   7  -7  -3   42.44   13.52   4
   6  -7  -3  707.40   51.30   1
  -6   7   3  670.33   52.66   2
   6  -7  -3  592.81   45.13   4
   5  -7  -3 1817.17  103.15   4
   5  -7  -3 1688.62  113.82   1
  -5   7   3 1714.32  122.56   2
   4  -7  -3  286.51   27.58   1
  -4   7   3  285.19   27.17   2
   4  -7  -3  300.60   25.01   4
   4  -7  -3  277.13   22.35   3
   3  -7  -3  451.55   34.64   1
   3  -7  -3  445.01   31.40   4
   3  -7  -3  366.23   31.31   3
  -3   7   3  418.35   34.92   2
   2  -7  -3   55.59   12.75   1
   2  -7  -3   65.29   12.29   4
  -2   7   3   45.42   11.37   2
   2  -7  -3   39.51    7.85   3
   1  -7  -3  741.66   55.92   3
   1  -7  -3  770.19   54.13   1
  -1   7   3  819.78   57.93   2
   1  -7  -3  751.10   48.59   4
   0  -7  -3   29.84    7.59   3
   0  -7  -3   65.23   12.75   1
   0   7   3   42.41   10.93   2
  -1  -7  -3   98.77   15.40   1
   1   7   3   97.97   15.05   2
  -1  -7  -3   88.01   12.27   3
  -2  -7  -3 2525.28  178.99   3
  -2  -7  -3 2515.19  161.22   1
   2   7   3 2640.28  176.29   2
   3   7   3  184.33   21.07   2
  -3  -7  -3  170.04   21.31   1
  -3  -7  -3  176.24   19.51   3
   4   7   3   -3.17    7.43   2
  -4  -7  -3   -7.95    8.92   1
  -4  -7  -3   13.41    7.83   3
   5   7   3  164.73   21.65   2
  -5  -7  -3  182.61   20.53   1
  -5  -7  -3  184.16   21.07   3
   6   7   3 1209.66   88.24   2
  -6  -7  -3 1171.66   89.18   3
   7   7   3    8.37   10.06   2
  -7  -7  -3   14.75    9.44   3
  -8  -7  -3   98.98   18.07   3
   8   7   3   95.53   17.81   2
  -9  -7  -3  593.75   52.90   3
   9   7   3  620.11   52.06   2
 -10  -7  -3    4.50   10.32   3
  10   7   3   14.47   11.90   2
 -11  -7  -3   60.32   17.99   3
 -12  -7  -3   10.80   12.56   3
 -13  -7  -3  284.00   36.29   3
 -14  -7  -3   40.15   16.36   3
  14  -8  -3   29.88   11.17   4
  14  -8  -3    1.95   14.61   1
  13  -8  -3  196.63   31.28   1
  13  -8  -3  191.01   26.22   4
  12  -8  -3   82.94   20.47   1
  12  -8  -3   82.88   15.89   4
 -12   8   3   90.09   21.02   2
 -11   8   3  389.32   40.65   2
  11  -8  -3  387.77   33.71   4
  11  -8  -3  383.35   41.51   1
  10  -8  -3  636.11   53.46   1
  10  -8  -3  647.94   48.24   4
 -10   8   3  662.56   57.74   2
  -9   8   3   41.04   15.88   2
   9  -8  -3   17.19   12.51   1
   9  -8  -3   19.41    9.64   4
  -8   8   3  290.29   31.40   2
   8  -8  -3  294.21   33.25   1
   8  -8  -3  244.57   28.42   4
   7  -8  -3   28.97   15.02   1
   7  -8  -3   65.24   15.34   4
  -7   8   3   45.69   14.25   2
   6  -8  -3  819.35   56.59   4
  -6   8   3  807.33   64.85   2
   6  -8  -3  883.39   63.61   1
  -5   8   3   39.75   13.06   2
   5  -8  -3   44.67   15.26   1
   5  -8  -3   44.12   12.85   4
   4  -8  -3 1082.90   63.71   4
  -4   8   3  849.78   71.81   2
   4  -8  -3  990.59   69.48   1
   3  -8  -3 1628.52  113.06   1
  -3   8   3 1737.47  122.06   2
   3  -8  -3 1831.25  102.96   4
   2  -8  -3   -6.28    6.75   4
  -2   8   3   -0.61    7.07   2
   2  -8  -3    5.27    4.43   3
   2  -8  -3   -3.26    8.25   1
   1  -8  -3  339.07   29.40   3
   1  -8  -3  399.22   32.43   1
  -1   8   3  377.14   32.28   2
   0  -8  -3  451.01   36.09   3
   0  -8  -3  426.27   36.49   1
   0   8   3  494.01   38.53   2
   1   8   3  977.03   70.26   2
  -1  -8  -3  961.61   69.20   3
  -1  -8  -3  870.30   65.22   1
  -2  -8  -3  191.84   19.73   3
  -2  -8  -3  172.14   22.67   1
   2   8   3  190.72   22.18   2
  -3  -8  -3  234.23   24.27   3
   3   8   3  251.56   25.70   2
  -3  -8  -3  261.32   28.55   1
   4   8   3  701.67   53.46   2
  -4  -8  -3  697.12   52.72   3
  -4  -8  -3  573.84   49.83   1
   5   8   3   18.10   10.72   2
  -5  -8  -3   25.22    9.78   3
  -5  -8  -3   27.34   12.62   1
   6   8   3   -9.26    9.51   2
  -6  -8  -3    5.28    7.72   3
   7   8   3  147.33   23.17   2
  -7  -8  -3  196.49   23.62   3
  -8  -8  -3 1691.57  119.39   3
   8   8   3 1473.94  115.38   2
   9   8   3  305.43   32.42   2
  -9  -8  -3  325.16   33.87   3
 -10  -8  -3    4.19    8.06   3
  10   8   3   -0.67   12.24   2
 -11  -8  -3  653.71   57.87   3
 -12  -8  -3    2.45    9.72   3
 -13  -8  -3   73.32   20.24   3
  13  -9  -3  482.54   51.64   1
  13  -9  -3  434.48   39.41   4
  12  -9  -3   93.09   25.05   1
  12  -9  -3  111.69   19.01   4
 -12   9   3   83.69   21.13   2
 -11   9   3   26.71   16.89   2
  11  -9  -3   63.55   13.89   4
  11  -9  -3   34.02   16.86   1
 -10   9   3  330.34   40.26   2
  10  -9  -3  366.74   33.21   4
  10  -9  -3  405.86   43.21   1
  -9   9   3  120.56   23.63   2
   9  -9  -3  121.05   26.01   1
   9  -9  -3  145.85   23.74   4
   8  -9  -3  329.51   33.23   4
   8  -9  -3  319.68   37.17   1
  -8   9   3  302.23   33.86   2
  -7   9   3   11.84   12.49   2
   7  -9  -3   20.15   14.34   1
   7  -9  -3   40.17   13.77   4
   6  -9  -3  713.34   56.16   1
   6  -9  -3  696.24   51.05   4
  -6   9   3  684.03   56.92   2
  -5   9   3  740.49   63.02   2
   5  -9  -3  826.96   62.08   1
   5  -9  -3  868.87   57.04   4
   4  -9  -3  273.05   30.83   1
   4  -9  -3  293.78   28.72   4
  -4   9   3  284.30   28.48   2
  -3   9   3  149.69   20.64   2
   3  -9  -3  150.58   22.14   1
   3  -9  -3  158.29   20.27   4
  -2   9   3   -3.86    8.40   2
   2  -9  -3   -5.52    9.00   1
   1  -9  -3 1272.04   90.84   1
  -1   9   3 1415.48   97.16   2
   0   9   3    6.06    7.59   2
   0  -9  -3    6.49   10.14   1
   0  -9  -3    6.01    5.61   3
  -1  -9  -3  286.57   30.76   1
  -1  -9  -3  346.44   29.69   3
   1   9   3  387.38   32.44   2
  -2  -9  -3  390.54   35.79   1
  -2  -9  -3  382.51   32.83   3
   2   9   3  368.16   34.32   2
  -3  -9  -3   67.24   12.54   3
  -3  -9  -3   70.28   17.85   1
   3   9   3   59.26   14.25   2
  -4  -9  -3   63.72   16.87   1
   4   9   3    6.91   11.17   2
  -4  -9  -3   30.17   10.38   3
   5   9   3   16.51   12.01   2
  -5  -9  -3   25.45   10.64   3
  -6  -9  -3  987.55   75.86   3
   6   9   3  959.16   75.29   2
   7   9   3   60.28   16.93   2
  -7  -9  -3  107.51   17.83   3
  -8  -9  -3   56.98   15.70   3
   8   9   3   31.96   14.12   2
   9   9   3  272.77   32.98   2
  -9  -9  -3  282.78   31.50   3
 -10  -9  -3  209.77   28.10   3
 -11  -9  -3   27.13   11.75   3
 -12  -9  -3   26.77   13.77   3
 -13  -9  -3  334.13   37.48   3
  12 -10  -3  120.11   25.60   1
 -12  10   3   51.86   20.43   2
  12 -10  -3   60.87   15.44   4
  11 -10  -3  349.24   36.60   4
  11 -10  -3  333.85   41.58   1
 -11  10   3  269.91   37.88   2
  10 -10  -3  288.17   38.86   1
 -10  10   3  291.07   37.40   2
  10 -10  -3  308.91   34.88   4
  -9  10   3   52.41   17.95   2
   9 -10  -3   42.30   16.97   1
   9 -10  -3   30.61   15.84   4
   8 -10  -3  307.70   35.11   4
   8 -10  -3  365.18   39.76   1
  -8  10   3  293.77   35.65   2
   7 -10  -3   -9.66   12.46   4
   7 -10  -3   -1.11   13.65   1
  -7  10   3   -3.32   10.59   2
   6 -10  -3  479.20   40.09   4
  -6  10   3  440.88   41.76   2
   6 -10  -3  457.71   42.70   1
   5 -10  -3    5.29   11.34   4
  -5  10   3   -0.41   10.66   2
   5 -10  -3   24.80   14.10   1
   4 -10  -3  382.14   35.90   1
  -4  10   3  341.80   33.93   2
   4 -10  -3  367.75   32.76   4
  -3  10   3  563.74   49.48   2
   3 -10  -3  641.80   50.22   1
   2 -10  -3   86.57   20.12   1
  -2  10   3  100.33   17.44   2
  -1  10   3  526.89   41.77   2
   1 -10  -3  428.21   40.60   1
   0  10   3   10.82    9.51   2
   0 -10  -3   12.42   12.23   1
  -1 -10  -3  874.78   66.94   1
   1  10   3  927.24   69.38   2
  -1 -10  -3  914.54   67.45   3
  -2 -10  -3   19.31    8.58   3
   2  10   3   20.78   10.36   2
  -2 -10  -3    8.87   12.98   1
  -3 -10  -3   43.77   17.14   1
   3  10   3   39.48   13.87   2
  -3 -10  -3   54.72   12.48   3
  -4 -10  -3  615.18   48.08   3
   4  10   3  540.74   48.35   2
   5  10   3   43.20   13.92   2
  -5 -10  -3   30.22   11.07   3
  -6 -10  -3   11.43    8.92   3
   6  10   3   -0.66   10.93   2
  -7 -10  -3    8.92    9.88   3
   7  10   3    1.04   11.75   2
   8  10   3  722.98   61.01   2
  -8 -10  -3  725.35   61.46   3
   9  10   3   47.64   16.13   2
  -9 -10  -3   53.28   15.44   3
 -10 -10  -3   14.38   10.02   3
 -11 -10  -3  486.62   46.89   3
 -12 -10  -3   10.73   13.94   3
 -12  11   3   16.75   17.33   2
  11 -11  -3   32.92   15.14   4
  11 -11  -3   80.18   23.40   1
 -11  11   3   31.92   18.38   2
 -10  11   3  173.92   29.09   2
  10 -11  -3  184.04   32.74   1
  10 -11  -3  152.93   27.94   4
   9 -11  -3  378.12   39.57   4
   9 -11  -3  395.65   44.18   1
  -9  11   3  293.81   38.93   2
   8 -11  -3  652.99   54.63   1
  -8  11   3  557.22   52.99   2
   8 -11  -3  587.66   49.21   4
   7 -11  -3    2.22   12.76   1
   7 -11  -3   12.89   12.72   4
  -7  11   3   -7.03   10.96   2
   6 -11  -3  379.28   37.26   4
   6 -11  -3  405.68   39.46   1
  -6  11   3  372.43   37.40   2
  -5  11   3  344.96   36.06   2
   5 -11  -3  397.52   41.29   1
   4 -11  -3  206.04   29.39   1
  -4  11   3  214.06   26.51   2
   3 -11  -3   58.81   18.34   1
  -3  11   3   81.50   16.92   2
   2 -11  -3  167.95   25.80   1
  -2  11   3  129.11   20.76   2
   1 -11  -3  999.60   76.70   1
  -1  11   3 1105.18   80.02   2
   0  11   3   13.57   10.67   2
   0 -11  -3   29.96   13.65   1
  -1 -11  -3  129.63   23.37   1
   1  11   3   91.08   17.96   2
  -2 -11  -3  302.92   34.59   1
   2  11   3  238.07   27.84   2
  -3 -11  -3  288.11   26.76   3
   3  11   3  263.03   28.82   2
  -4 -11  -3   12.60    8.41   3
   4  11   3   22.57   12.50   2
  -5 -11  -3  211.59   25.64   3
   5  11   3  223.14   28.33   2
  -6 -11  -3 1001.24   78.70   3
   6  11   3  990.43   78.32   2
  -7 -11  -3   46.15   13.92   3
   7  11   3   47.81   15.58   2
   8  11   3   65.43   18.49   2
  -8 -11  -3   10.11   10.23   3
  -9 -11  -3  131.39   22.88   3
 -10 -11  -3  280.17   31.75   3
 -11 -11  -3    5.03   11.41   3
 -11  12   3  137.42   28.27   2
  10 -12  -3  190.34   32.03   4
  10 -12  -3  168.32   32.66   1
 -10  12   3  158.11   28.35   2
  -9  12   3   54.21   19.18   2
   9 -12  -3   23.51   16.32   4
   9 -12  -3  106.61   25.16   1
   8 -12  -3  337.60   38.40   4
   8 -12  -3  343.66   42.56   1
  -8  12   3  300.14   37.29   2
  -7  12   3   69.33   19.04   2
   7 -12  -3  108.54   25.88   1
   7 -12  -3  133.54   24.89   4
  -6  12   3  181.15   27.32   2
   6 -12  -3  239.52   34.02   1
  -5  12   3   12.61   11.95   2
   5 -12  -3   10.29   13.66   1
  -4  12   3  116.16   20.70   2
   4 -12  -3  134.02   25.15   1
   3 -12  -3  206.39   30.70   1
  -3  12   3  238.05   27.81   2
   2 -12  -3   83.21   20.99   1
  -2  12   3   88.44   18.10   2
   1 -12  -3   49.98   16.28   1
  -1  12   3   31.49   12.15   2
   0  12   3   75.53   16.01   2
   0 -12  -3   49.49   17.29   1
   1  12   3  792.18   60.22   2
  -1 -12  -3  679.47   59.07   1
   2  12   3  119.01   20.39   2
   3  12   3  247.35   29.50   2
   4  12   3  313.59   32.47   2
   5  12   3  108.59   20.29   2
  -5 -12  -3  111.56   18.27   3
   6  12   3   26.22   13.32   2
  -6 -12  -3   28.72   11.59   3
  -7 -12  -3    4.87   10.54   3
   7  12   3   11.25   12.48   2
   8  12   3  323.19   34.40   2
  -8 -12  -3  300.14   32.77   3
  -9 -12  -3   38.95   12.81   3
 -10 -12  -3   48.92   15.17   3
 -11 -12  -3  112.89   22.00   3
 -10  13   3   25.00   17.65   2
  -9  13   3  327.28   42.55   2
   9 -13  -3  425.81   49.06   1
  -8  13   3  144.27   26.46   2
   8 -13  -3  176.00   32.30   1
   7 -13  -3    4.77   16.09   1
  -7  13   3   -0.42   13.60   2
  -6  13   3  283.72   34.61   2
   6 -13  -3  294.25   39.11   1
  -5  13   3   40.26   14.45   2
   5 -13  -3   45.82   18.08   1
   4 -13  -3  141.31   27.66   1
  -4  13   3  149.94   24.12   2
   3 -13  -3   24.33   15.61   1
  -3  13   3   -6.48    9.25   2
  -2  13   3  154.40   23.06   2
   2 -13  -3   93.78   22.92   1
  -1  13   3  456.52   42.92   2
   1 -13  -3  507.43   45.35   1
   0  13   3   43.62   13.19   2
   0 -13  -3   28.28   15.51   1
   1  13   3  112.46   19.34   2
  -1 -13  -3   85.10   21.10   1
   2  13   3   23.39   11.92   2
   3  13   3  320.87   32.95   2
   4  13   3   38.64   14.50   2
   5  13   3  195.78   27.37   2
   6  13   3  568.90   50.77   2
  -7 -13  -3   28.70   11.73   3
   7  13   3   28.09   13.01   2
  -8 -13  -3   22.72   10.79   3
  -9 -13  -3   17.94   13.41   3
 -10 -13  -3  293.06   33.04   3
   8 -14  -3   62.90   22.09   1
  -8  14   3  118.48   22.41   2
   7 -14  -3   85.75   23.22   1
  -7  14   3   85.34   19.90   2
  -6  14   3  166.67   27.62   2
   6 -14  -3  182.33   32.73   1
  -5  14   3   68.80   17.91   2
   5 -14  -3   54.54   19.77   1
  -4  14   3  395.29   37.56   2
   4 -14  -3  291.58   40.08   1
  -3  14   3  105.69   18.63   2
   3 -14  -3   88.15   21.19   1
   2 -14  -3   97.77   21.14   1
  -2  14   3   76.95   16.34   2
   1 -14  -3  -30.84   13.00   1
  -1  14   3   21.42   11.41   2
   0 -14  -3   28.32   16.21   1
   0  14   3   30.20   12.50   2
   1  14   3  316.71   32.73   2
   2  14   3    9.79   10.30   2
   3  14   3  136.31   22.31   2
   4  14   3   84.24   17.04   2
   5  14   3  313.84   33.45   2
   6  14   3   -8.97   12.07   2
   6 -15  -3   87.74   22.56   1
   5 -15  -3   59.43   20.92   1
  -5  15   3   97.19   20.27   2
  -4  15   3  258.79   32.36   2
   4 -15  -3  228.27   35.73   1
  -3  15   3    3.98   11.14   2
   3 -15  -3   14.94   15.57   1
   2 -15  -3  143.90   26.69   1
  -2  15   3  183.04   26.31   2
  -1  15   3  186.79   26.60   2
   0  15   3   33.17   13.27   2
   1  15   3   35.82   13.45   2
   2  15   3   -0.22   11.55   2
   3  15   3  433.73   41.47   2
   4  15   3   19.83   12.57   2
   5  15   3   89.06   18.30   2
   6  15   3  133.75   21.39   2
   4 -16  -3  189.58   32.00   1
   3 -16  -3  -13.00   13.47   1
  -1  16   3   34.23   13.98   2
   0  16   3   74.92   17.46   2
   1  16   3  222.47   29.80   2
   2  16   3   41.26   13.93   2
   3  16   3   56.09   16.29   2
   4  16   3    0.64   11.93   2
  -3 -14   4   20.98   22.91   1
  -2 -14   4   55.01   25.99   1
  -1 -14   4   73.82   25.23   1
   0  14  -4  203.81   24.42   2
   0 -14   4  118.74   28.26   1
   1 -14   4   32.41   23.16   1
  -1  14  -4   44.79   14.77   2
   2 -14   4   15.82   18.49   1
  -2  14  -4   11.40   12.67   2
   3 -14   4  121.30   27.51   1
  -3  14  -4  237.44   28.03   2
   4 -14   4   20.13   19.05   1
  -4  14  -4   -6.40   11.10   2
  -4 -13   4  -20.01   23.52   1
  -3 -13   4   -1.43   23.35   1
  -2 -13   4  292.23   44.90   1
  -1 -13   4   33.53   23.64   1
   0 -13   4   50.20   22.47   1
   0  13  -4    9.86   11.49   2
  -1  13  -4  114.90   19.08   2
   1 -13   4   81.27   23.87   1
   2 -13   4   13.61   19.16   1
  -2  13  -4   46.07   13.41   2
  -3  13  -4   19.14   10.89   2
   3 -13   4   18.41   18.94   1
  -4  13  -4   -1.92   11.58   2
   4 -13   4   47.15   23.28   1
   5 -13   4  172.21   35.13   1
  -5  13  -4  215.27   27.49   2
  -6  13  -4   51.36   15.73   2
   6 -13   4   44.63   21.51   1
  -7  13  -4    7.25   12.00   2
   7 -13   4    8.57   16.51   1
  -5 -12   4   29.43   25.23   1
  -4 -12   4  143.85   34.67   1
  -3 -12   4   13.25   23.61   1
  -2 -12   4  112.85   31.12   1
   1  12  -4   16.73   10.39   2
  -1 -12   4  -20.44   17.10   1
   0  12  -4  314.32   29.04   2
   0 -12   4  238.56   38.09   1
   1 -12   4   -3.76   17.05   1
  -1  12  -4   55.17   13.21   2
  -2  12  -4   23.36   12.45   2
   2 -12   4   -0.38   16.64   1
  -3  12  -4  610.34   46.41   2
   3 -12   4  421.89   52.40   1
   4 -12   4    9.05   17.84   1
  -4  12  -4   19.37   11.26   2
  -5  12  -4    5.27   10.86   2
   5 -12   4  -32.44   11.96   1
  -6  12  -4    1.90   11.63   2
   6 -12   4  -26.14   14.75   1
  -7  12  -4  261.62   32.02   2
   7 -12   4  240.00   39.42   1
  -8  12  -4   72.80   17.69   2
   8 -12   4   50.06   19.24   1
   9 -12   4    0.81   15.06   1
   9  11  -4  417.63   47.47   3
   8  11  -4   11.38   17.43   3
   7  11  -4   69.53   19.87   3
  -6 -11   4  112.83   29.92   1
  -5 -11   4  209.33   36.22   1
  -4 -11   4   -5.92   21.86   1
  -3 -11   4   53.74   24.61   1
  -2 -11   4  365.60   48.48   1
   2  11  -4  444.81   36.49   2
   1  11  -4   10.76   10.38   2
  -1 -11   4    8.57   17.21   1
   0 -11   4    7.28   17.94   1
   0  11  -4   15.87   10.62   2
  -1  11  -4  110.22   17.76   2
   1 -11   4  133.71   25.79   1
   2 -11   4  145.52   29.85   1
  -2  11  -4  172.12   22.20   2
  -3  11  -4   53.25   14.55   2
   3 -11   4   63.95   20.95   1
  -4  11  -4   13.89   11.32   2
   4 -11   4   23.49   16.80   1
  -5  11  -4  555.29   45.38   2
   5 -11   4  435.01   51.22   1
   6 -11   4    2.83   14.09   1
  -6  11  -4   10.37   11.41   2
   7 -11   4    8.65   11.44   1
  -7  11  -4   12.76   11.76   2
   8 -11   4   49.85   16.46   1
  -8  11  -4   27.58   13.64   2
  -9  11  -4  176.71   27.65   2
   9 -11   4  174.91   32.15   1
 -10  11  -4   80.80   22.26   2
  10 -11   4   93.56   24.04   1
  10  10  -4   24.49   19.59   3
   9  10  -4  117.86   26.56   3
   8  10  -4   49.46   18.41   3
   7  10  -4  272.40   35.75   3
  -7 -10   4  190.96   37.29   1
   6  10  -4   27.14   14.69   3
  -6 -10   4   39.76   22.95   1
  -5 -10   4  178.53   38.07   1
   5  10  -4  287.13   29.91   3
  -4 -10   4  244.45   40.03   1
  -3 -10   4   23.24   21.63   1
   2  10  -4    4.40    8.21   2
  -2 -10   4   14.64   19.44   1
  -1 -10   4    8.77   17.33   1
   1  10  -4   10.37    8.89   2
   0  10  -4  542.01   40.98   2
   0 -10   4  423.38   50.70   1
   1 -10   4   -9.78   12.63   1
  -1  10  -4   10.44    9.44   2
   2 -10   4   75.42   21.89   1
  -2  10  -4  103.65   17.31   2
  -3  10  -4  605.31   46.19   2
   3 -10   4  480.07   49.81   1
  -4  10  -4  129.66   19.91   2
   4 -10   4  120.05   27.16   1
  -5  10  -4   61.38   16.95   2
   5 -10   4  104.02   23.25   1
  -6  10  -4   57.63   14.95   2
   6 -10   4   55.44   19.01   1
  -7  10  -4  275.49   31.24   2
   7 -10   4  304.66   39.34   1
  -8  10  -4  117.06   21.32   2
   8 -10   4  143.04   26.73   1
  -9  10  -4   10.27   14.71   2
   9 -10   4   11.16   14.51   1
 -10  10  -4  124.53   25.65   2
  10 -10   4  147.42   26.69   1
  11 -10   4   38.33   17.42   1
 -11  10  -4   63.46   20.44   2
  12 -10   4  116.93   24.94   1
  11   9  -4  -17.30   17.92   3
  10   9  -4  311.74   43.54   3
   9   9  -4  198.15   33.55   3
  -8  -9   4   13.26   20.22   1
   8   9  -4  -15.11   11.55   3
   7   9  -4   72.35   19.56   3
  -7  -9   4   73.12   24.62   1
  -6  -9   4   76.79   25.97   1
   6   9  -4   44.41   17.16   3
  -5  -9   4  262.04   39.90   1
   5   9  -4  261.14   32.86   3
   4   9  -4   47.05   13.97   3
  -4  -9   4   43.01   24.38   1
   3   9  -4   93.10   15.00   2
   3   9  -4  125.77   19.09   3
  -3  -9   4   95.35   28.21   1
  -2  -9   4  363.42   45.87   1
   2   9  -4  411.94   33.62   2
   1   9  -4   79.23   13.50   2
  -1  -9   4   85.27   25.78   1
   0  -9   4  127.73   27.33   1
   0   9  -4  145.36   18.61   2
   1  -9   4   13.77   15.81   1
  -1   9  -4   14.69    9.67   2
  -2   9  -4  561.05   43.56   2
   2  -9   4  485.11   48.26   1
  -3   9  -4  218.44   23.03   2
   3  -9   4  179.31   30.02   1
   4  -9   4   88.04   22.83   1
  -4   9  -4   99.47   17.42   2
  -5   9  -4 1244.73   87.69   2
   5  -9   4 1091.22   87.18   1
  -6   9  -4   60.43   14.91   2
   6  -9   4   75.78   20.78   1
   7  -9   4   22.13   14.69   1
  -7   9  -4   11.00   12.78   2
  -8   9  -4   29.09   13.96   2
   8  -9   4   20.58   13.82   1
   9  -9   4  527.36   50.06   1
  -9   9  -4  526.65   49.19   2
 -10   9  -4  100.69   23.89   2
  10  -9   4  107.09   23.40   1
 -11   9  -4   20.32   17.69   2
  11  -9   4   27.86   15.55   1
 -12   9  -4  288.93   38.94   2
  12  -9   4  232.06   36.07   1
  13  -9   4   -2.28   13.26   1
  11   8  -4  129.70   28.95   3
  10   8  -4   12.82   15.62   3
  -9  -8   4   70.28   20.67   1
   9   8  -4   49.23   20.07   3
   8   8  -4   86.38   22.36   3
  -8  -8   4   43.92   21.94   1
   7   8  -4  365.27   38.07   3
  -7  -8   4  301.88   42.70   1
   6   8  -4   24.12   13.37   3
  -6  -8   4    0.48   21.05   1
  -5  -8   4  612.84   58.15   1
   5   8  -4  608.54   53.82   3
   4   8  -4  356.48   34.64   3
  -4  -8   4  318.89   43.71   1
   3   8  -4  304.22   28.24   2
   3   8  -4  378.21   32.85   3
  -3  -8   4  284.96   42.78   1
   2   8  -4   29.07    9.27   2
  -2  -8   4   22.22   20.68   1
   2   8  -4   42.62   10.93   3
   1   8  -4   -2.83    7.32   2
   1   8  -4   -0.86    6.29   3
  -1  -8   4   -1.68   17.89   1
   0  -8   4  642.46   58.16   1
   0   8  -4  729.46   52.80   2
   1  -8   4  116.89   24.84   1
  -1   8  -4  133.71   16.84   2
  -2   8  -4   20.18    9.77   2
   2  -8   4    0.62   13.43   1
   3  -8   4  113.14   24.68   1
  -3   8  -4  116.36   17.07   2
   4  -8   4  259.53   34.21   1
  -4   8  -4  264.71   26.95   2
   5  -8   4   30.60   14.74   1
  -5   8  -4   15.28   11.02   2
  -6   8  -4   18.86   11.68   2
   6  -8   4   -0.12   11.74   1
  -7   8  -4  849.41   66.14   2
   7  -8   4  812.32   66.69   1
   8  -8   4   86.33   21.47   1
  -8   8  -4   64.23   18.17   2
   9  -8   4    0.73   12.83   1
  -9   8  -4   -3.25   12.70   2
  10  -8   4  163.02   28.55   1
 -10   8  -4  182.07   28.42   2
 -11   8  -4  151.01   27.30   2
  11  -8   4  134.52   25.35   1
  12  -8   4   78.43   18.25   1
 -12   8  -4  104.12   25.37   2
  13  -8   4    3.93   13.38   1
 -13   8  -4   13.19   16.73   2
  14  -8   4  325.04   40.80   1
  12   7  -4  171.51   32.86   3
  11   7  -4   23.10   17.43   3
  10   7  -4  201.15   33.63   3
  -9  -7   4  273.25   33.89   1
   9   7  -4  284.95   37.93   3
  -8  -7   4   10.85   15.76   1
   8   7  -4   -7.05   12.54   3
  -7  -7   4  145.17   28.92   1
   7   7  -4  143.73   25.11   3
  -6  -7   4   12.66   19.49   1
   6   7  -4   16.06   13.11   3
  -5  -7   4  282.90   39.38   1
   5   7  -4  316.70   32.93   3
  -4  -7   4    7.28   20.86   1
   4   7  -4   10.14    9.79   3
   4   7  -4    5.23    6.02   2
   3   7  -4  127.58   18.49   3
   3   7  -4   92.35   13.46   2
  -3  -7   4   85.73   27.24   1
  -2  -7   4  400.18   47.52   1
   2   7  -4  445.05   34.75   2
   2   7  -4  453.02   37.71   3
   1   7  -4  120.44   15.01   2
  -1  -7   4  113.15   26.05   1
   1   7  -4  116.06   15.65   3
   0   7  -4  135.60   16.38   2
   0  -7   4  130.61   25.70   1
   0   7  -4  126.74   15.59   3
   1  -7   4   11.56   13.75   1
  -1   7  -4   21.11    8.98   2
   2  -7   4 1009.74   73.99   1
  -2   7  -4  953.90   71.20   2
   3  -7   4   14.91   13.07   1
  -3   7  -4   14.13    8.91   2
  -4   7  -4   16.37   10.22   2
   4  -7   4   40.66   14.91   1
   5  -7   4  541.79   48.86   1
  -5   7  -4  618.25   47.76   2
   6  -7   4   71.62   18.72   1
  -6   7  -4   56.86   15.03   2
   7  -7   4  240.13   32.02   1
  -7   7  -4  199.61   26.23   2
  -8   7  -4   54.84   16.95   2
   8  -7   4   56.30   19.19   1
  -9   7  -4 1284.64   98.55   2
   9  -7   4 1312.69   95.43   1
 -10   7  -4    0.06   13.18   2
  10  -7   4   40.64   17.54   1
 -11   7  -4   15.68   14.66   2
  11  -7   4   16.25   13.89   1
  12  -7   4  211.49   29.33   4
 -12   7  -4  226.01   34.83   2
  12  -7   4  242.29   35.27   1
  13  -7   4   33.29   14.98   4
 -13   7  -4    4.51   15.45   2
  13  -7   4   15.87   16.77   1
 -14   7  -4  102.67   25.83   2
  14  -7   4   87.25   22.79   1
  14  -7   4  121.27   21.96   4
  15  -7   4   22.50   13.82   4
  15  -7   4   -3.23   16.47   1
  13   6  -4    8.40   12.29   3
  12   6  -4  270.62   40.70   3
  11   6  -4   61.33   21.47   3
  10   6  -4  402.30   43.20   3
 -10  -6   4  376.00   36.87   1
  -9  -6   4   65.31   18.09   1
   9   6  -4   46.25   17.89   3
   8   6  -4  381.67   40.38   3
  -8  -6   4  388.96   38.10   1
   7   6  -4  711.90   59.50   3
  -7  -6   4  624.14   54.93   1
   6   6  -4   36.32   13.77   3
  -6  -6   4    6.12   18.00   1
  -5  -6   4  329.05   41.22   1
   5   6  -4  425.94   37.62   3
  -4  -6   4   12.94   18.39   1
   4   6  -4    9.99    9.53   3
   4   6  -4   -4.18    5.54   2
   3   6  -4  530.13   42.06   2
  -3  -6   4  520.83   51.40   1
   3   6  -4  647.01   47.87   3
  -2  -6   4  -17.88   14.44   1
   2   6  -4    0.11    7.37   3
   2   6  -4    0.37    5.93   2
   1   6  -4  237.71   20.75   2
  -1  -6   4  239.91   33.47   1
   1   6  -4  210.75   21.97   3
   0   6  -4 2678.54  179.38   3
   0  -6   4 2586.04  167.63   1
   0   6  -4 2425.06  173.54   2
  -1   6  -4    4.56    7.10   2
  -1   6  -4    8.73    5.68   3
   1  -6   4   10.06   12.51   1
  -2   6  -4   83.62   12.67   2
  -2   6  -4   79.29   10.59   3
   2  -6   4   70.86   18.91   1
  -3   6  -4   20.63    9.03   2
   3  -6   4   25.94   12.26   1
   4  -6   4  272.16   31.54   1
  -4   6  -4  276.96   26.24   2
   5  -6   4   91.15   18.74   1
  -5   6  -4   65.24   14.24   2
   6  -6   4  384.86   36.97   1
  -6   6  -4  370.50   34.29   2
   7  -6   4 1742.82  119.51   1
  -7   6  -4 1767.03  125.68   2
   8  -6   4   75.30   18.85   1
  -8   6  -4   89.11   19.12   2
   9  -6   4   14.73   13.38   4
   9  -6   4   -7.59   12.70   1
  -9   6  -4   10.72   12.77   2
  10  -6   4  298.57   32.01   4
 -10   6  -4  270.75   34.19   2
  10  -6   4  260.47   34.21   1
  11  -6   4  736.72   54.98   4
  11  -6   4  676.02   59.14   1
 -11   6  -4  745.03   63.54   2
 -12   6  -4  158.14   29.49   2
  12  -6   4  191.19   27.05   4
  12  -6   4  181.73   29.59   1
 -13   6  -4   39.90   19.81   2
  13  -6   4   39.52   14.34   4
  13  -6   4   15.03   14.78   1
  14  -6   4  335.73   42.13   1
 -14   6  -4  386.44   47.30   2
  14  -6   4  329.84   36.59   4
  15  -6   4  -10.79   13.37   1
  15  -6   4    7.70   12.98   4
 -15   6  -4   19.70   19.40   2
  13   5  -4   56.56   18.71   3
  12   5  -4  117.93   24.85   3
  11   5  -4   61.79   17.88   3
 -11  -5   4   54.28   17.48   1
  10   5  -4  513.45   52.92   3
 -10  -5   4  604.00   47.39   1
   9   5  -4  181.75   28.38   3
  -9  -5   4  180.34   25.89   1
   8   5  -4  134.83   24.51   3
  -8  -5   4  124.79   23.16   1
   7   5  -4   70.98   18.44   3
  -7  -5   4   96.58   20.94   1
  -6  -5   4  165.78   27.60   1
   6   5  -4  188.13   25.42   3
   5   5  -4  562.11   43.30   2
   5   5  -4  568.90   49.79   3
  -5  -5   4  651.59   51.95   1
   4   5  -4   32.59   11.03   3
   4   5  -4   19.54    6.32   2
  -4  -5   4   20.98   16.35   1
   3   5  -4  609.54   47.22   3
   3   5  -4  510.27   41.62   2
  -3  -5   4  607.26   51.50   1
  -2  -5   4  351.54   39.65   1
   2   5  -4  330.31   26.94   2
   2   5  -4  350.68   30.50   3
  -1  -5   4  261.82   33.24   1
   1   5  -4  232.55   20.75   2
   1   5  -4  250.05   23.52   3
   0   5  -4    1.41    5.26   3
   0   5  -4    5.85    6.18   2
   0  -5   4   15.61   13.41   1
   1  -5   4  237.87   27.50   1
  -1   5  -4  157.65   17.50   3
  -1   5  -4  147.78   17.12   2
   2  -5   4 1181.54   90.10   1
  -2   5  -4 1289.84   92.84   2
  -2   5  -4 1526.51   95.93   3
  -3   5  -4    7.52    7.28   2
   3  -5   4   -6.46    9.43   1
   4  -5   4   56.08   14.93   1
  -4   5  -4   34.90   10.68   2
   5  -5   4  605.82   50.42   1
  -5   5  -4  688.55   50.67   2
   6  -5   4  360.44   33.75   1
  -6   5  -4  331.73   31.55   2
  -7   5  -4  142.59   21.74   2
   7  -5   4  213.02   27.13   1
  -8   5  -4   11.64   11.96   2
   8  -5   4   -5.23    9.88   1
   8  -5   4    7.25    9.87   4
  -9   5  -4  585.97   53.71   2
   9  -5   4  677.33   48.56   4
   9  -5   4  633.39   52.47   1
  10  -5   4   24.56   12.21   1
  10  -5   4   28.68   12.06   4
 -10   5  -4   27.61   16.26   2
  11  -5   4   15.11   14.20   1
 -11   5  -4   62.70   18.18   2
  11  -5   4   76.50   16.85   4
  12  -5   4  262.35   34.21   1
 -12   5  -4  269.58   36.19   2
  12  -5   4  290.43   31.62   4
  13  -5   4  315.26   33.29   4
 -13   5  -4  257.98   37.77   2
  13  -5   4  299.84   37.00   1
 -14   5  -4  137.25   30.10   2
  14  -5   4  180.85   24.79   4
  14  -5   4  150.21   25.94   1
 -15   5  -4   29.74   18.48   2
  14   4  -4  161.28   29.39   3
  13   4  -4   15.22   13.02   3
  12   4  -4  277.07   37.34   3
 -12  -4   4  304.52   29.71   1
 -11  -4   4    9.70   12.17   1
  11   4  -4   23.38   13.68   3
 -10  -4   4  262.75   28.70   1
  10   4  -4  217.85   31.51   3
   9   4  -4  -14.15    9.85   3
  -9  -4   4   12.90   13.42   1
   8   4  -4  324.35   36.17   3
  -8  -4   4  370.72   33.20   1
  -7  -4   4  889.24   65.13   1
   7   4  -4  924.73   73.20   3
  -6  -4   4   38.98   15.12   1
   6   4  -4   30.40   12.92   3
   5   4  -4  103.79   12.58   2
  -5  -4   4  170.80   24.80   1
   5   4  -4  125.01   19.30   3
   4   4  -4   32.02   10.76   3
   4   4  -4   18.04    5.40   2
  -4  -4   4   48.73   16.49   1
   3   4  -4  646.45   47.06   3
  -3  -4   4  601.05   49.28   1
   3   4  -4  485.94   40.93   2
   2   4  -4   78.71   10.19   2
  -2  -4   4  110.51   22.97   1
   2   4  -4  102.17   14.21   3
  -1  -4   4 1464.38   94.26   1
   1   4  -4 1357.80   96.08   3
   1   4  -4 1186.18   90.92   2
   0  -4   4 2700.55  154.64   1
   0   4  -4 2220.05  165.03   3
   0   4  -4 2179.27  159.01   2
  -1   4  -4  454.44   37.16   3
   1  -4   4  449.72   39.69   1
  -1   4  -4  522.56   36.18   2
  -2   4  -4  370.60   28.57   2
  -2   4  -4  351.58   28.80   3
   2  -4   4  322.35   31.49   1
   3  -4   4  105.02   18.43   1
  -3   4  -4  108.97   14.06   2
  -3   4  -4  112.04   11.17   3
   4  -4   4 2609.25  167.01   1
  -4   4  -4 2649.60  179.10   2
   5  -4   4  185.21   22.91   1
  -5   4  -4  132.67   18.10   2
   6  -4   4  879.56   65.43   1
  -6   4  -4  937.56   68.04   2
   7  -4   4  646.90   49.06   1
  -7   4  -4  541.86   48.52   2
   7  -4   4  636.50   44.25   4
   8  -4   4   60.21   16.19   1
   8  -4   4   58.02   13.68   4
  -8   4  -4   53.54   15.11   2
   9  -4   4   97.38   18.47   4
  -9   4  -4   78.51   19.25   2
   9  -4   4   82.58   18.60   1
 -10   4  -4  163.63   26.07   2
  10  -4   4  167.42   23.10   4
  10  -4   4  179.85   26.61   1
 -11   4  -4 1404.21  113.22   2
  11  -4   4 1532.18  105.62   1
  11  -4   4 1597.26   95.83   4
 -12   4  -4  291.83   36.86   2
  12  -4   4  306.46   31.35   4
  12  -4   4  254.59   33.77   1
 -13   4  -4   -2.90   13.80   2
  13  -4   4   -6.05   12.80   1
  13  -4   4   11.69   10.16   4
  14  -4   4  391.35   33.88   4
  14  -4   4  336.53   39.73   1
 -14   4  -4  311.53   41.47   2
 -15   4  -4   24.52   17.14   2
 -16   4  -4   59.44   18.82   2
  14   3  -4   63.28   17.19   3
  13   3  -4   99.41   20.74   3
 -12  -3   4  113.15   19.51   1
  12   3  -4   90.52   20.69   3
 -11  -3   4   30.81   14.10   1
  11   3  -4   37.09   13.46   3
 -10  -3   4  900.06   62.19   1
  10   3  -4  817.78   71.94   3
   9   3  -4  145.86   23.92   3
  -9  -3   4  173.51   22.50   1
   8   3  -4  280.54   31.47   3
  -8  -3   4  323.22   29.74   1
  -7  -3   4  259.60   25.07   1
   7   3  -4  218.63   27.92   3
   6   3  -4  243.63   26.44   3
  -6  -3   4  225.21   25.92   1
   5   3  -4  628.86   49.87   2
   5   3  -4  779.92   57.78   3
  -5  -3   4  739.20   53.23   1
   4   3  -4    1.76    3.17   2
   4   3  -4    4.19    7.15   3
  -4  -3   4    0.75   11.76   1
   3   3  -4  225.56   22.54   3
  -3  -3   4  263.94   29.15   1
   3   3  -4  199.07   17.83   2
   2   3  -4  202.64   20.41   3
  -2  -3   4  212.38   27.04   1
   2   3  -4  190.61   16.32   2
   1   3  -4  835.51   61.08   2
   1   3  -4  887.57   65.51   3
  -1  -3   4  944.21   65.59   1
   0   3  -4   93.25   11.26   2
   0   3  -4  100.88   13.53   3
   0  -3   4  145.08   21.06   1
   1  -3   4  571.91   43.17   1
  -1   3  -4  533.56   39.79   2
  -1   3  -4  541.43   42.61   3
  -2   3  -4 2039.96  140.91   3
  -2   3  -4 1886.24  136.03   2
   2  -3   4 2100.36  129.04   1
   3  -3   4   -3.09    7.83   1
  -3   3  -4    3.60    3.85   3
  -3   3  -4    5.17    6.27   2
  -4   3  -4  515.67   40.77   2
   4  -3   4  545.54   41.19   1
   5  -3   4  300.09   27.87   1
  -5   3  -4  283.45   23.75   3
  -5   3  -4  331.51   27.60   2
  -6   3  -4  509.29   39.26   3
   6  -3   4  572.64   42.05   1
  -6   3  -4  536.98   42.59   2
   6  -3   4  489.22   37.10   4
  -7   3  -4  147.38   15.39   3
   7  -3   4  186.65   21.85   1
  -7   3  -4  168.28   21.13   2
   7  -3   4  159.93   19.43   4
   8  -3   4    4.82    9.44   4
  -8   3  -4    5.30   10.70   2
   8  -3   4   -2.14    9.65   1
   9  -3   4  582.08   43.26   4
   9  -3   4  566.92   47.43   1
  -9   3  -4  640.47   51.78   2
 -10   3  -4   34.37   15.13   2
  10  -3   4   76.02   14.88   4
  10  -3   4   38.63   14.72   1
 -11   3  -4    7.13   13.66   2
  11  -3   4   43.17   15.55   1
  11  -3   4    8.39    8.97   4
  12  -3   4   37.33   14.77   1
 -12   3  -4   51.67   17.97   2
  12  -3   4   18.70   10.13   4
 -13   3  -4  362.74   41.86   2
  13  -3   4  432.00   40.56   1
  13  -3   4  422.04   34.84   4
 -14   3  -4  103.84   23.63   2
 -15   3  -4   34.95   17.75   2
  15   2  -4  375.98   41.16   3
  14   2  -4   50.66   17.01   3
  13   2  -4   -5.66   11.57   3
 -13  -2   4    7.18   11.06   1
 -12  -2   4   44.04   15.22   1
  12   2  -4   31.05   15.93   3
 -11  -2   4  244.26   26.54   1
  11   2  -4  188.51   28.90   3
  10   2  -4  286.36   36.57   3
 -10  -2   4  387.04   31.77   1
  -9  -2   4   12.34   11.64   1
   9   2  -4   32.64   13.34   3
  -8  -2   4  908.53   62.60   1
   8   2  -4  892.47   72.12   3
   7   2  -4  243.58   28.31   3
  -7  -2   4  305.41   25.97   1
   6   2  -4   32.68    5.76   2
  -6  -2   4   49.89   12.82   1
   6   2  -4   42.53   12.66   3
  -5  -2   4  220.78   21.78   1
   5   2  -4  198.28   22.32   3
  -4  -2   4   67.37   14.62   1
   4   2  -4   71.70   12.73   3
   3   2  -4 1604.67  123.74   3
  -3  -2   4 1882.22  113.17   1
   2   2  -4    5.05    2.94   2
  -2  -2   4    8.80   11.24   1
   2   2  -4    3.15    6.39   3
   1   2  -4  608.37   45.65   3
   1   2  -4  620.22   41.25   2
  -1  -2   4  556.40   45.43   1
   0   2  -4  326.31   24.57   2
   0   2  -4  343.25   28.20   3
   0  -2   4  322.85   29.77   1
  -1   2  -4  598.51   41.78   2
   1  -2   4  611.47   44.09   1
  -1   2  -4  546.29   45.19   3
  -2   2  -4  195.58   19.10   3
  -2   2  -4  201.89   17.57   2
   2  -2   4  212.10   20.86   1
  -3   2  -4    8.90    6.25   2
  -3   2  -4   15.81    4.94   3
   3  -2   4    7.49    8.64   1
   4  -2   4 8544.43  529.86   1
  -4   2  -4 8773.96  598.31   3
  -4   2  -4 9013.70  582.78   2
   5  -2   4   93.17   13.25   4
   5  -2   4   91.28   14.56   1
  -5   2  -4   82.42   10.75   3
  -5   2  -4  104.98   14.49   2
  -6   2  -4   78.58   10.79   3
   6  -2   4   84.90   13.71   4
   6  -2   4  109.37   15.54   1
  -6   2  -4   90.84   14.81   2
  -7   2  -4  960.84   69.87   2
  -7   2  -4  850.54   67.59   3
   7  -2   4  923.96   64.76   1
   7  -2   4  984.71   59.36   4
   8  -2   4  176.84   19.99   4
  -8   2  -4  172.70   22.60   2
  -8   2  -4  171.64   18.74   3
   8  -2   4  175.18   22.30   1
   9  -2   4    8.89   11.48   1
  -9   2  -4   39.07    9.56   3
  -9   2  -4   39.00   14.35   2
   9  -2   4   24.37   10.52   4
  10  -2   4   27.31   14.19   1
 -10   2  -4   71.44   17.95   2
  10  -2   4   63.13   12.81   4
  11  -2   4 1357.18   78.80   4
  11  -2   4 1296.93   87.65   1
 -11   2  -4 1076.79   93.42   2
  12  -2   4   83.65   15.35   4
  12  -2   4  109.11   21.39   1
 -12   2  -4   94.14   21.45   2
 -13   2  -4   20.56   13.72   2
 -14   2  -4  388.77   42.13   2
 -15   2  -4  279.03   37.57   2
  15   1  -4   89.56   19.81   3
 -14  -1   4  176.27   23.25   1
  14   1  -4  174.95   29.21   3
 -13  -1   4  409.40   35.81   1
  13   1  -4  445.84   43.99   3
 -12  -1   4  307.94   29.39   1
  12   1  -4  312.97   34.71   3
  11   1  -4   62.75   16.69   3
 -11  -1   4   72.43   16.18   1
  10   1  -4  527.70   48.58   3
 -10  -1   4  526.26   41.06   1
   9   1  -4   13.08   10.13   3
  -9  -1   4   22.33   11.68   1
  -8  -1   4  328.74   27.67   1
   8   1  -4  300.81   31.48   3
   7   1  -4    5.44    8.75   3
  -7  -1   4    9.92    8.74   1
   6   1  -4  862.59   64.94   3
  -6  -1   4  789.03   55.87   1
   5   1  -4 2018.62  157.60   3
  -5  -1   4 2433.00  139.63   1
   4   1  -4   57.19   11.72   3
  -4  -1   4   48.51   11.37   1
  -3  -1   4 2287.10  133.88   1
   3   1  -4 1980.94  150.01   3
  -2  -1   4  219.27   21.43   1
   2   1  -4  186.97   19.49   3
   1   1  -4  399.65   28.04   2
  -1  -1   4  373.96   31.98   1
   1   1  -4  436.72   33.22   3
   0   1  -4   36.44    9.46   3
   0  -1   4   45.43   12.68   1
   0   1  -4   35.25    5.54   2
  -1   1  -4  434.72   37.74   3
   1  -1   4  502.25   36.48   1
  -1   1  -4  489.40   34.26   2
   2  -1   4 4249.98  238.52   1
  -2   1  -4 3895.83  267.73   3
  -2   1  -4 3539.87  259.28   2
   3  -1   4   80.26   11.87   1
  -3   1  -4   83.66   10.69   2
  -3   1  -4   62.39    9.15   3
  -4   1  -4  542.98   38.85   2
  -4   1  -4  434.94   37.57   3
   4  -1   4  527.23   36.62   1
  -5   1  -4  396.99   34.40   3
   5  -1   4  440.65   30.37   4
  -5   1  -4  494.14   36.17   2
   5  -1   4  447.13   33.47   1
  -6   1  -4 1698.96  118.00   3
  -6   1  -4 1702.05  116.82   2
   6  -1   4 1671.41   95.87   4
   6  -1   4 1600.29  106.37   1
   7  -1   4   46.35   10.24   4
   7  -1   4   43.38   11.85   1
  -7   1  -4   56.06   12.77   2
  -7   1  -4   50.35    9.94   3
   8  -1   4  426.29   33.81   1
  -8   1  -4  377.48   35.16   2
   8  -1   4  396.10   29.89   4
  -8   1  -4  381.47   33.38   3
   9  -1   4 1009.28   70.05   1
  -9   1  -4 1007.00   76.53   2
   9  -1   4  973.36   62.81   4
  -9   1  -4 1052.96   76.13   3
 -10   1  -4    6.69    9.25   3
 -10   1  -4   29.22   12.90   2
  10  -1   4   -1.93    8.40   4
  10  -1   4   -7.26    9.30   1
 -11   1  -4   17.81   12.15   2
 -11   1  -4   15.00    9.53   3
  11  -1   4   11.34    9.75   1
  11  -1   4    0.35    7.79   4
  12  -1   4    9.06    7.74   4
  12  -1   4   22.01   10.51   1
 -12   1  -4   17.61   12.80   2
 -13   1  -4  356.72   38.57   2
 -14   1  -4   63.17   20.09   2
  15  -1   4   -6.15   20.45   2
  16   0  -4   24.86   14.82   3
  15   0  -4  247.67   35.37   3
 -15   0   4  244.74   28.22   1
 -14   0   4   12.30   12.43   1
  14   0  -4   40.72   14.69   3
 -13   0   4    3.50   10.22   1
  13   0  -4   -0.12   11.22   3
 -12   0   4   36.54   12.72   1
  12   0  -4   36.64   15.31   3
 -11   0   4  573.01   43.43   1
  11   0  -4  547.52   50.70   3
  10   0  -4  114.97   20.43   3
 -10   0   4  120.56   17.85   1
  -9   0   4    9.61    9.88   1
   9   0  -4   15.43   10.00   3
   8   0  -4  790.45   64.59   3
  -8   0   4  814.66   55.47   1
  -7   0   4   27.66    8.90   1
   7   0  -4   14.27    6.31   2
   7   0  -4   18.45   10.42   3
  -6   0   4  170.87   16.64   1
   6   0  -4  139.44   19.04   3
  -5   0   4  177.64   17.50   1
   5   0  -4  171.97   19.69   3
  -4   0   4 1417.81   93.51   1
   4   0  -4 1553.89  107.38   3
  -3   0   4 1510.93   95.63   1
   3   0  -4 1539.01  109.02   3
  -2   0   4    8.91    6.32   1
   2   0  -4   -2.13    5.29   3
  -1   0   4  319.21   26.96   1
   1   0  -4  405.58   31.28   3
   0   0  -4   29.32    9.48   3
   0   0   4   33.13   10.13   1
   0   0  -4   15.94    4.38   2
  -1   0  -4   53.37   10.43   3
  -1   0  -4   38.95    7.01   2
   1   0   4   97.54   13.00   1
  -2   0  -4  321.57   27.38   2
   2   0   4  435.66   28.17   1
  -2   0  -4  342.52   28.68   3
  -3   0  -4  319.14   26.35   3
  -3   0  -4  342.04   26.51   2
   3   0   4  335.34   24.81   1
   4   0   4 2102.19  125.30   1
  -4   0  -4 2029.01  137.80   2
  -4   0  -4 1924.10  140.94   3
   4   0   4 2041.27  112.19   4
  -5   0  -4  440.69   34.82   2
   5   0   4  464.54   32.30   1
   5   0   4  408.57   28.83   4
  -5   0  -4  437.84   34.83   3
   6   0   4   51.48    9.40   4
  -6   0  -4   66.92   12.23   2
  -6   0  -4   70.07   11.21   3
   6   0   4   64.42   11.56   1
   7   0   4  142.09   16.83   1
  -7   0  -4  146.39   17.16   3
   7   0   4  127.69   14.65   4
  -7   0  -4  157.96   18.49   2
  -8   0  -4 1873.34  131.24   3
  -8   0  -4 1671.60  128.03   2
   8   0   4 1971.25  105.58   4
   8   0   4 1817.48  116.80   1
   9   0   4  188.52   19.80   4
  -9   0  -4  199.16   23.92   2
  -9   0  -4  205.35   22.84   3
   9   0   4  235.87   22.63   1
 -10   0  -4  227.93   26.20   3
  10   0   4  274.73   24.78   1
  10   0   4  216.99   22.23   4
 -10   0  -4  231.45   27.65   2
 -11   0  -4 1148.70   83.82   3
  11   0   4 1159.40   68.03   4
 -11   0  -4  997.20   81.91   2
  11   0   4  994.23   73.83   1
 -12   0  -4    5.05   11.75   2
 -12   0  -4    4.54    9.69   3
  13   0   4    8.93   17.67   2
 -13   0  -4   19.23   11.14   3
  14   0   4   68.00   23.75   2
 -15   1   4   27.60   13.12   1
  14  -1  -4   -1.27   12.58   3
 -14   1   4   10.46   11.20   1
  13  -1  -4  974.26   79.14   3
 -13   1   4  901.84   65.84   1
 -12   1   4  190.30   24.19   1
  12  -1  -4  244.84   30.95   3
 -11   1   4    7.05   10.96   1
  11  -1  -4   22.59   10.78   3
 -10   1   4  239.67   23.46   1
  10  -1  -4  219.90   28.00   3
   9  -1  -4   16.84    9.88   3
  -9   1   4   28.47   10.73   1
   8  -1  -4  561.49   47.64   3
  -8   1   4  540.45   40.31   1
  -7   1   4  248.04   22.37   1
   7  -1  -4  253.33   26.86   3
  -7   1   4  290.35   21.54   2
   6  -1  -4 1247.97   89.41   3
  -6   1   4 1238.78   82.11   2
  -6   1   4 1107.01   76.87   1
  -5   1   4  569.52   38.78   2
  -5   1   4  503.03   37.79   1
   5  -1  -4  570.86   44.60   3
   4  -1  -4  103.61   14.13   3
  -4   1   4   96.18   11.86   1
  -4   1   4   72.32    8.18   2
   3  -1  -4 1230.08   81.43   3
  -3   1   4  987.14   69.76   1
   2  -1  -4   23.29    8.27   3
  -2   1   4   23.13    6.71   1
   1  -1  -4 6362.87  457.43   3
  -1   1   4 7045.11  440.96   2
  -1   1   4 6593.04  400.03   1
   0   1   4   35.54    7.27   1
   0  -1  -4   41.38   10.23   3
   0   1   4   50.57    6.64   2
  -1  -1  -4 5424.81  350.72   3
   1   1   4 4779.11  307.38   1
   1   1   4 5134.67  339.92   2
   2   1   4 3435.56  247.31   2
   2   1   4 3812.45  223.14   1
  -2  -1  -4 3828.58  253.83   3
  -3  -1  -4    8.00    5.37   2
   3   1   4   11.56    5.04   1
  -3  -1  -4    9.60    5.17   3
   4   1   4   77.14    9.36   4
  -4  -1  -4  105.22   12.05   2
   4   1   4   99.67   10.61   1
  -4  -1  -4  111.93   12.45   3
   5   1   4  111.28   11.48   4
   5   1   4  125.87   13.17   1
  -5  -1  -4  129.50   14.97   3
  -5  -1  -4  147.73   15.75   2
   6   1   4 1800.65  105.98   4
  -6  -1  -4 1899.65  134.88   3
  -6  -1  -4 1944.04  131.52   2
   6   1   4 1972.85  118.46   1
   7   1   4    7.43    6.32   1
  -7  -1  -4    4.22    7.32   2
  -7  -1  -4   -3.51    6.02   3
   7   1   4    0.45    4.90   4
  -8  -1  -4  352.45   32.57   2
  -8  -1  -4  390.60   33.67   3
  -9  -1  -4 1247.36   91.31   3
  -9  -1  -4 1196.05   89.24   2
 -10  -1  -4  777.00   59.00   3
  10   1   4  657.72   62.41   2
  11   1   4   35.62   18.03   2
 -11  -1  -4   23.63   12.02   3
  12   1   4   12.62   15.31   2
 -12  -1  -4    9.16   11.38   3
 -13  -1  -4  514.08   47.91   3
  13   1   4  527.42   52.89   2
 -14  -1  -4  418.00   39.42   3
  14   1   4  315.48   44.37   2
 -16   2   4   43.39   13.16   1
 -15   2   4  333.57   31.00   1
 -14   2   4   56.87   15.29   1
 -13   2   4   36.75   14.28   1
  13  -2  -4   61.80   15.28   3
  12  -2  -4  184.61   26.62   3
 -12   2   4  161.94   21.82   1
 -11   2   4 1013.07   71.17   1
  11  -2  -4 1076.76   83.68   3
  10  -2  -4  227.12   25.95   3
 -10   2   4  220.87   23.68   1
   9  -2  -4   -5.79    9.29   3
  -9   2   4   10.10    9.68   1
   8  -2  -4 1960.00  138.67   3
  -8   2   4 1956.07  130.85   2
  -8   2   4 1792.46  120.18   1
  -7   2   4   15.34    5.80   2
   7  -2  -4   13.64    9.30   3
  -7   2   4   25.96    8.39   1
   6  -2  -4  214.11   22.60   3
  -6   2   4  212.15   18.15   2
  -6   2   4  212.12   19.13   1
  -5   2   4   30.14    7.73   1
  -5   2   4   13.21    4.80   2
   5  -2  -4   16.03    8.03   3
   4  -2  -4  751.37   55.82   3
  -4   2   4  767.73   50.89   2
  -4   2   4  656.61   47.54   1
   3  -2  -4 3167.92  216.99   3
  -3   2   4 3054.71  207.27   2
  -3   2   4 3116.58  189.24   1
  -2   2   4   60.43    7.91   2
  -2   2   4   73.83    8.96   1
   2  -2  -4   85.73   13.28   3
  -1   2   4  270.26   21.90   2
   1  -2  -4  319.75   26.84   3
  -1   2   4  268.49   20.18   1
   0  -2  -4  110.27   12.82   3
   0   2   4   80.46    8.62   1
   0   2   4   94.92   10.44   2
  -1  -2  -4  277.09   22.91   3
   1   2   4  258.31   17.92   1
   1   2   4  284.10   22.37   2
  -2  -2  -4  309.37   24.77   3
   2   2   4  281.52   24.50   2
  -3  -2  -4  473.45   37.36   3
   3   2   4  500.31   38.13   2
   4   2   4 1004.15   66.27   1
  -4  -2  -4 1118.25   78.11   3
   4   2   4 1112.94   78.05   2
  -5  -2  -4   -8.28    5.08   3
   5   2   4    2.49    8.47   2
   6   2   4  228.18   25.23   2
  -6  -2  -4  221.15   16.11   1
  -6  -2  -4  228.78   22.78   3
  -7  -2  -4   56.05   11.59   3
  -7  -2  -4   45.78    6.19   1
   7   2   4   46.90   14.12   2
   8   2   4 1969.59  142.38   2
  -8  -2  -4 2008.26  121.68   1
  -8  -2  -4 1978.71  142.49   3
  -9  -2  -4    6.40    4.82   1
   9   2   4    6.01   14.29   2
  -9  -2  -4   13.94    9.17   3
  10   2   4   23.55   14.50   2
 -10  -2  -4   12.01   10.17   3
  11   2   4 1012.60   86.19   2
 -11  -2  -4 1149.43   85.32   3
 -12  -2  -4   19.17   11.68   3
  12   2   4   39.21   18.11   2
  13   2   4   -8.90   15.87   2
 -13  -2  -4   17.25   11.93   3
  14   2   4   14.57   16.80   2
 -14  -2  -4    5.03   11.24   3
 -15  -2  -4  525.99   51.78   3
 -15   3   4   99.89   19.07   1
 -14   3   4  107.96   19.84   1
 -13   3   4  818.33   59.36   1
  12  -3  -4   -0.15    9.57   3
 -12   3   4   -3.19    9.68   1
  11  -3  -4    5.25    9.70   3
 -11   3   4    9.20    9.79   1
  10  -3  -4  176.29   23.53   3
 -10   3   4  157.31   20.21   1
   9  -3  -4  364.85   34.26   3
  -9   3   4  298.13   29.00   2
  -9   3   4  353.15   29.15   1
   8  -3  -4  713.46   59.67   3
  -8   3   4  778.07   52.38   1
  -8   3   4  757.08   55.84   2
  -7   3   4  106.34   13.36   2
   7  -3  -4  136.16   18.01   3
  -7   3   4  108.33   14.92   1
   6  -3  -4 1163.47   84.99   3
  -6   3   4 1174.10   80.12   2
  -6   3   4 1084.75   73.62   1
   5  -3  -4   83.40   13.50   3
  -5   3   4   66.07   10.79   1
  -5   3   4   56.71    9.69   2
  -4   3   4  172.52   16.18   2
  -4   3   4  148.38   15.26   1
   4  -3  -4  185.89   19.84   3
  -3   3   4  609.45   44.07   2
   3  -3  -4  631.88   48.69   3
  -3   3   4  599.06   40.69   1
  -2   3   4 2493.19  170.64   2
  -2   3   4 2475.20  154.53   1
   2  -3  -4 2656.70  178.44   3
  -1   3   4 3733.78  250.07   2
   1  -3  -4 4070.92  258.97   3
  -1   3   4 3430.45  225.34   1
   0   3   4  364.16   28.60   2
   0  -3  -4  404.49   29.82   3
   0   3   4  342.28   24.04   1
   1   3   4 1852.43  117.89   1
  -1  -3  -4 2120.91  136.85   3
   1   3   4 1909.58  133.34   2
   2   3   4 1190.01   82.21   2
  -2  -3  -4 1155.20   83.48   3
   3   3   4 2220.32  156.15   2
  -3  -3  -4 2357.55  159.75   3
  -4  -3  -4    9.76    6.67   3
   4   3   4    6.76    7.83   2
  -5  -3  -4  544.45   44.47   3
   5   3   4  554.28   45.28   2
  -5  -3  -4  598.60   35.27   1
   6   3   4 2063.94  148.24   2
  -6  -3  -4 2145.69  150.49   3
  -6  -3  -4 2149.62  128.24   1
   7   3   4  209.79   25.78   2
  -7  -3  -4  217.96   15.83   1
  -7  -3  -4  227.44   23.52   3
  -8  -3  -4  171.02   14.10   1
  -8  -3  -4  158.33   21.13   3
   8   3   4  208.75   25.59   2
  -9  -3  -4  677.65   54.31   3
   9   3   4  636.12   56.08   2
 -10  -3  -4 1050.54   80.08   3
  10   3   4  994.52   81.28   2
 -11  -3  -4   64.27   16.67   3
  11   3   4   47.06   17.79   2
 -12  -3  -4   70.40   17.52   3
  12   3   4   77.86   20.43   2
  13   3   4 1361.53  107.17   2
 -13  -3  -4 1352.64  105.77   3
 -14  -3  -4   53.48   17.33   3
 -15  -3  -4   17.22   13.60   3
 -16  -3  -4   51.21   17.27   3
 -15   4   4  306.64   30.38   1
 -14   4   4   40.06   14.85   1
 -13   4   4   25.25   13.26   1
 -12   4   4  109.26   18.70   1
 -11   4   4  713.54   52.29   1
 -10   4   4  421.76   34.38   1
  10  -4  -4  422.75   39.90   3
  -9   4   4    7.95   10.01   1
   9  -4  -4  -15.89    9.75   3
  -9   4   4   23.04    9.54   2
  -8   4   4 1262.51   93.64   2
  -8   4   4 1383.33   86.26   1
   8  -4  -4 1300.70   98.10   3
  -7   4   4  110.94   14.86   2
  -7   4   4  113.18   15.16   1
   7  -4  -4  106.52   16.64   3
   6  -4  -4  229.39   22.85   3
  -6   4   4  196.32   18.51   1
  -6   4   4  183.00   19.52   2
   5  -4  -4   96.06   15.15   3
  -5   4   4  114.07   13.38   2
  -5   4   4   86.16   12.45   1
  -4   4   4  771.05   53.79   2
  -4   4   4  756.79   49.02   1
   4  -4  -4  680.91   56.67   3
  -3   4   4 1441.77   93.26   2
  -3   4   4 1328.64   84.15   1
   3  -4  -4 1260.76   96.98   3
  -2   4   4    3.77    4.63   1
  -2   4   4   -7.88    4.22   2
   2  -4  -4    4.63    6.59   3
  -1   4   4  694.69   45.95   1
   1  -4  -4  750.89   53.47   3
  -1   4   4  729.31   52.52   2
   0  -4  -4   44.88    7.20   1
   0   4   4   53.97    9.15   2
   0  -4  -4   42.78    6.23   4
   0  -4  -4   37.98    7.61   3
  -1  -4  -4 1913.26  110.46   4
  -1  -4  -4 2209.68  141.56   3
   1   4   4 2049.15  138.47   2
  -1  -4  -4 1936.75  123.35   1
   2   4   4  401.20   31.70   2
  -2  -4  -4  405.40   31.37   3
  -2  -4  -4  359.96   26.04   1
  -3  -4  -4 1350.87   99.86   3
   3   4   4 1453.98   98.89   2
  -4  -4  -4 1382.50   99.21   3
   4   4   4 1374.78   97.84   2
  -5  -4  -4    7.01    2.47   1
   5   4   4   -4.63    7.50   2
  -5  -4  -4   -0.92    6.49   3
   6   4   4   21.02   10.14   2
  -6  -4  -4   13.14    3.54   1
  -6  -4  -4   18.87    8.34   3
  -7  -4  -4   95.32    7.87   1
   7   4   4   78.00   16.17   2
  -7  -4  -4   70.28   14.06   3
  -8  -4  -4 1184.26   90.58   3
   8   4   4 1234.89   91.17   2
   9   4   4  -10.85    9.74   2
  -9  -4  -4   -0.23    7.73   3
  10   4   4   75.35   18.71   2
 -10  -4  -4   76.04   16.96   3
  11   4   4  918.43   75.95   2
 -11  -4  -4  944.08   75.82   3
  12   4   4   61.76   19.40   2
 -12  -4  -4   94.37   19.81   3
 -13  -4  -4    9.19   10.16   3
  13   4   4   -6.76   12.80   2
 -14  -4  -4   -8.39   10.65   3
 -15  -4  -4  393.62   42.68   3
 -16  -4  -4   59.62   19.78   3
 -15   5   4   91.61   18.54   1
 -14   5   4   48.16   15.40   1
 -13   5   4  307.22   29.91   1
 -12   5   4   46.02   14.08   1
 -11   5   4   21.87   11.50   1
 -10   5   4   48.67   13.76   1
 -10   5   4   41.24   13.10   2
  -9   5   4 1453.70   93.57   1
  -9   5   4 1400.13  103.09   2
   8  -5  -4  327.81   34.75   3
  -8   5   4  415.05   34.44   2
  -8   5   4  384.91   30.82   1
   7  -5  -4    7.76    8.46   3
  -7   5   4   -4.55    9.09   1
  -7   5   4   -3.40    8.16   2
   6  -5  -4 2041.33  159.83   3
  -6   5   4 2412.88  140.88   1
  -6   5   4 2302.91  155.31   2
  -5   5   4  127.86   14.44   1
  -5   5   4  113.69   15.04   2
   5  -5  -4  103.50   15.73   3
   4  -5  -4  357.62   32.04   3
  -4   5   4  414.83   31.42   2
  -4   5   4  352.38   27.77   1
  -3   5   4   18.24    7.94   2
   3  -5  -4   33.68    8.94   3
  -3   5   4   35.32    7.73   1
  -2   5   4 1046.67   74.19   2
   2  -5  -4 1089.56   75.18   3
  -2   5   4  996.05   65.82   1
   1  -5  -4 1257.18   88.58   3
   1  -5  -4 1207.86   79.49   1
   1  -5  -4 1248.74   71.63   4
  -1   5   4 1292.26   88.15   2
   0   5   4  125.85   14.70   2
   0  -5  -4  115.73   12.96   3
   0  -5  -4  109.15   10.87   4
   0  -5  -4   96.51   12.08   1
   1   5   4  587.06   41.56   2
  -1  -5  -4  531.10   35.88   1
  -1  -5  -4  501.74   32.10   4
  -1  -5  -4  500.47   40.32   3
  -2  -5  -4   19.87    6.38   1
  -2  -5  -4   22.54    7.32   3
   2   5   4   20.94    8.85   2
  -3  -5  -4 1908.95  134.78   3
   3   5   4 1906.56  132.35   2
  -4  -5  -4  116.53   15.22   3
  -4  -5  -4  111.52   10.84   1
   4   5   4  118.39   16.70   2
  -5  -5  -4  469.99   38.76   3
   5   5   4  451.22   38.87   2
  -5  -5  -4  456.29   29.70   1
  -6  -5  -4 1908.11  144.00   3
   6   5   4 2044.84  142.12   2
  -6  -5  -4 2098.57  122.51   1
  -7  -5  -4    4.37    8.00   3
   7   5   4    5.78    8.88   2
   8   5   4  102.70   19.07   2
  -8  -5  -4  112.75   17.75   3
   9   5   4   45.26   14.76   2
  -9  -5  -4   35.44   13.21   3
  10   5   4  529.58   50.39   2
 -10  -5  -4  622.72   51.34   3
 -11  -5  -4  217.57   26.95   3
  11   5   4  143.23   25.25   2
 -12  -5  -4  226.88   29.77   3
  12   5   4  186.18   28.64   2
 -13  -5  -4  838.06   71.31   3
 -14  -5  -4   46.49   15.68   3
 -15  -5  -4   17.35   13.77   3
  14  -6  -4   82.24   21.35   1
  14  -6  -4   58.13   15.11   4
  13  -6  -4   29.80   16.88   1
  13  -6  -4   53.95   12.99   4
 -12   6   4   20.41   11.84   1
 -11   6   4  776.55   56.77   1
 -10   6   4  246.52   25.13   1
 -10   6   4  176.98   25.51   2
  -9   6   4   44.58   12.80   1
  -9   6   4   27.22   14.29   2
  -8   6   4  225.77   25.75   2
  -8   6   4  220.11   22.33   1
  -7   6   4  292.38   25.33   1
  -7   6   4  273.27   28.26   2
   6  -6  -4  389.76   36.74   3
  -6   6   4  463.15   37.51   2
  -6   6   4  457.03   33.53   1
  -5   6   4    5.49    7.05   1
  -5   6   4   -1.78    6.79   2
   5  -6  -4   17.14    8.09   3
  -4   6   4 2609.17  172.68   2
   4  -6  -4 2559.88  158.60   1
   4  -6  -4 2361.66  141.88   4
   4  -6  -4 2543.58  175.72   3
   3  -6  -4  709.45   43.79   4
  -3   6   4  658.46   50.49   2
   3  -6  -4  664.15   49.77   3
   3  -6  -4  652.35   47.65   1
   2  -6  -4   21.49    7.98   4
   2  -6  -4   37.44    9.63   1
  -2   6   4   18.99    8.27   2
   2  -6  -4   30.95    6.90   3
   1  -6  -4  449.22   33.51   1
  -1   6   4  477.05   36.41   2
   1  -6  -4  421.19   34.38   3
   1  -6  -4  439.48   30.28   4
   0  -6  -4   11.62    6.67   3
   0  -6  -4   15.24    7.02   1
   0   6   4   18.63    8.01   2
   0  -6  -4   -3.94    4.80   4
   1   6   4 1534.76  103.90   2
  -1  -6  -4 1380.18   92.95   1
  -1  -6  -4 1496.32  104.41   3
   2   6   4  444.26   34.14   2
  -2  -6  -4  327.44   28.79   1
  -2  -6  -4  392.64   32.22   3
  -3  -6  -4 1040.86   73.46   1
   3   6   4 1210.21   82.54   2
  -3  -6  -4 1140.07   82.70   3
   4   6   4 1140.75   80.52   2
  -4  -6  -4 1048.48   80.72   3
  -5  -6  -4  990.96   77.00   3
   5   6   4 1064.55   76.92   2
  -6  -6  -4   51.82   12.67   3
   6   6   4   66.94   15.13   2
  -7  -6  -4   44.93   12.24   3
   7   6   4   41.71   13.91   2
   8   6   4  579.94   52.03   2
  -8  -6  -4  670.83   52.98   3
   9   6   4   70.37   16.30   2
  -9  -6  -4   41.43   13.66   3
  10   6   4   73.33   17.70   2
 -10  -6  -4   85.19   18.61   3
  11   6   4  255.13   32.60   2
 -11  -6  -4  284.88   31.88   3
  12   6   4  314.16   37.34   2
 -12  -6  -4  308.88   36.24   3
 -13  -6  -4    1.81   11.11   3
 -14  -6  -4  -12.23   10.16   3
 -15  -6  -4  377.59   41.79   3
  14  -7  -4   -0.67   13.24   1
  14  -7  -4   -7.08   10.39   4
  13  -7  -4  542.81   48.95   1
  13  -7  -4  550.49   43.81   4
  12  -7  -4  -11.12    8.86   4
  12  -7  -4   24.84   14.91   1
  11  -7  -4   28.91   13.71   1
  11  -7  -4   10.18    9.25   4
  10  -7  -4    3.90    8.61   4
  10  -7  -4   17.01   12.55   1
 -10   7   4   15.61   13.20   2
   9  -7  -4  389.60   33.22   4
   9  -7  -4  399.42   37.12   1
  -9   7   4  370.15   38.12   2
   8  -7  -4  170.45   22.70   4
   8  -7  -4  185.29   25.43   1
  -8   7   4  168.10   23.85   2
  -7   7   4  141.53   21.43   2
   7  -7  -4  136.36   20.14   4
   7  -7  -4  160.11   23.13   1
  -6   7   4 1417.54  101.60   2
   6  -7  -4 1475.44   95.46   1
   6  -7  -4 1316.46   85.20   4
  -5   7   4  117.49   17.86   2
   5  -7  -4  125.06   18.91   1
   5  -7  -4  130.88   17.70   4
   4  -7  -4 1279.74   78.62   4
  -4   7   4 1417.66   94.25   2
   4  -7  -4 1235.02   92.20   3
   4  -7  -4 1287.45   87.10   1
   3  -7  -4   -6.32    5.89   4
   3  -7  -4   17.28    5.70   3
  -3   7   4   12.67    7.79   2
   3  -7  -4   13.67    9.25   1
  -2   7   4  708.33   53.03   2
   2  -7  -4  715.79   45.02   4
   2  -7  -4  697.02   50.92   3
   2  -7  -4  652.53   49.25   1
   1  -7  -4  582.69   43.13   1
   1  -7  -4  585.21   39.43   4
   1  -7  -4  584.00   44.90   3
  -1   7   4  644.47   47.20   2
   0  -7  -4   11.78    6.23   3
   0   7   4   15.97    8.67   2
   0  -7  -4   20.60    7.92   1
   1   7   4   64.34   13.14   2
  -1  -7  -4   57.05   11.69   1
  -1  -7  -4   59.03   10.58   3
  -2  -7  -4  142.94   17.41   1
   2   7   4  162.95   19.83   2
  -2  -7  -4  146.57   17.17   3
  -3  -7  -4 1218.59   86.62   3
   3   7   4 1223.73   86.29   2
  -3  -7  -4 1088.67   77.69   1
  -4  -7  -4    3.64    6.83   3
  -4  -7  -4   17.34    8.87   1
   4   7   4    4.29    9.33   2
   5   7   4 1259.40   94.20   2
  -5  -7  -4 1318.51   95.62   3
  -6  -7  -4  412.99   38.80   3
   6   7   4  477.64   40.04   2
   7   7   4  127.07   19.90   2
  -7  -7  -4   91.12   16.87   3
   8   7   4   74.11   16.67   2
  -8  -7  -4   65.13   15.18   3
  -9  -7  -4   38.28   13.33   3
   9   7   4   52.27   15.42   2
 -10  -7  -4  826.42   67.25   3
  10   7   4  783.57   66.64   2
  11   7   4   99.22   20.80   2
 -11  -7  -4   91.69   20.64   3
 -12  -7  -4   71.96   19.33   3
 -13  -7  -4  281.27   35.71   3
 -14  -7  -4   83.57   21.67   3
  13  -8  -4    1.26    9.29   4
  13  -8  -4    5.28   12.24   1
  12  -8  -4  144.30   25.44   1
  12  -8  -4  110.37   19.49   4
  11  -8  -4  749.83   58.39   1
 -11   8   4  662.99   60.86   2
  11  -8  -4  695.65   51.45   4
 -10   8   4   30.45   16.21   2
  10  -8  -4    8.31   12.18   1
  10  -8  -4   15.08    9.99   4
   9  -8  -4   47.24   16.84   1
  -9   8   4   73.99   18.41   2
   9  -8  -4   58.12   14.53   4
  -8   8   4  148.01   22.43   2
   8  -8  -4  112.62   20.68   4
   8  -8  -4  118.01   22.77   1
   7  -8  -4  682.62   53.59   1
   7  -8  -4  671.30   48.60   4
  -7   8   4  674.74   55.54   2
  -6   8   4  460.10   40.40   2
   6  -8  -4  455.81   39.54   1
   6  -8  -4  435.52   35.55   4
   5  -8  -4  126.05   21.49   1
   5  -8  -4  170.90   20.74   4
  -5   8   4  153.52   21.18   2
   4  -8  -4 1468.13   97.30   1
  -4   8   4 1469.35  104.10   2
   4  -8  -4 1409.06   87.23   4
  -3   8   4   37.53   10.73   2
   3  -8  -4   29.32   10.50   4
   3  -8  -4   28.54   12.00   1
   2  -8  -4  578.93   43.13   1
  -2   8   4  584.08   45.46   2
   2  -8  -4  569.50   39.20   4
   2  -8  -4  515.98   42.13   3
   1  -8  -4  299.16   27.09   1
   1  -8  -4  303.06   24.58   4
   1  -8  -4  288.44   25.63   3
  -1   8   4  335.43   29.00   2
   0  -8  -4 1093.97   80.21   3
   0   8   4 1187.61   81.87   2
   0  -8  -4 1048.25   74.49   1
  -1  -8  -4 1983.57  136.14   1
   1   8   4 2421.77  150.77   2
  -1  -8  -4 2034.35  150.81   3
  -2  -8  -4   -0.64    7.31   1
   2   8   4    2.74    8.61   2
  -2  -8  -4    4.60    6.85   3
  -3  -8  -4  849.03   62.73   3
   3   8   4  806.21   62.94   2
  -3  -8  -4  791.96   58.50   1
  -4  -8  -4  258.36   26.41   3
  -4  -8  -4  254.95   25.87   1
   4   8   4  272.46   28.31   2
   5   8   4  799.13   63.17   2
  -5  -8  -4  800.02   63.09   3
  -6  -8  -4   45.12   12.59   3
   6   8   4   40.53   13.82   2
   7   8   4   61.36   15.97   2
  -7  -8  -4   76.38   15.83   3
   8   8   4 1707.05  128.20   2
  -8  -8  -4 1816.15  130.61   3
  -9  -8  -4   -2.27    9.17   3
   9   8   4   13.00   12.43   2
  10   8   4  161.93   26.01   2
 -10  -8  -4  198.43   27.16   3
  11   8   4   34.49   14.48   2
 -11  -8  -4   36.13   12.98   3
 -12  -8  -4  220.98   30.27   3
 -13  -8  -4   32.03   15.84   3
 -14  -8  -4   56.88   19.00   3
  13  -9  -4  426.59   47.65   1
  13  -9  -4  366.27   39.07   4
  12  -9  -4  134.83   26.76   1
  12  -9  -4  114.34   20.11   4
  11  -9  -4   82.76   17.23   4
 -11   9   4   59.83   19.38   2
  11  -9  -4   28.14   14.07   1
  10  -9  -4    4.58   12.84   1
  10  -9  -4    4.95    9.29   4
 -10   9   4   14.43   15.86   2
   9  -9  -4  328.77   33.30   4
   9  -9  -4  275.58   35.94   1
  -9   9   4  295.27   35.17   2
   8  -9  -4  222.53   30.74   1
  -8   9   4  195.60   27.90   2
   8  -9  -4  201.00   26.02   4
   7  -9  -4   21.58   12.12   4
  -7   9   4   44.33   14.59   2
   7  -9  -4   38.89   16.91   1
   6  -9  -4  252.87   26.10   4
   6  -9  -4  164.39   26.56   1
  -6   9   4  187.91   25.48   2
   5  -9  -4   38.84   15.11   1
   5  -9  -4   53.05   14.59   4
  -5   9   4   41.34   13.76   2
   4  -9  -4  673.64   51.71   1
   4  -9  -4  671.44   47.08   4
  -4   9   4  632.26   52.75   2
  -3   9   4  292.85   27.28   2
   3  -9  -4  238.67   27.40   1
   3  -9  -4  211.04   24.43   4
   2  -9  -4 1107.89   72.92   4
  -2   9   4 1283.27   87.85   2
   2  -9  -4 1177.99   81.63   1
  -1   9   4  144.84   19.73   2
   1  -9  -4  107.14   14.59   3
   1  -9  -4  160.11   20.80   1
   0  -9  -4   47.62   10.14   3
   0  -9  -4   44.93   13.26   1
   0   9   4   60.44   13.21   2
   1   9   4   16.25    9.91   2
  -1  -9  -4   31.59    8.92   3
  -1  -9  -4   24.58   10.79   1
   2   9   4  289.04   28.18   2
  -2  -9  -4  281.81   26.47   3
  -2  -9  -4  243.72   27.69   1
  -3  -9  -4  582.17   47.57   1
   3   9   4  636.95   50.65   2
  -3  -9  -4  581.87   48.29   3
  -4  -9  -4   28.52   10.82   3
   4   9   4   21.45   13.21   2
   5   9   4  515.31   46.60   2
  -5  -9  -4  558.97   45.60   3
   6   9   4  297.76   31.16   2
  -6  -9  -4  284.20   29.53   3
  -7  -9  -4  250.22   27.01   3
   7   9   4  228.84   29.69   2
   8   9   4  113.55   20.30   2
  -8  -9  -4   95.59   18.98   3
  -9  -9  -4  149.02   23.37   3
   9   9   4  138.67   23.64   2
 -10  -9  -4  504.62   46.27   3
  10   9   4  456.69   45.59   2
 -11  -9  -4   21.85   11.18   3
 -12  -9  -4   18.09   11.91   3
 -13  -9  -4  159.01   26.93   3
  12 -10  -4   70.37   24.89   1
  12 -10  -4   64.43   16.13   4
  11 -10  -4  606.79   46.82   4
  11 -10  -4  565.48   52.84   1
 -11  10   4  506.77   53.56   2
 -10  10   4   81.57   21.51   2
  10 -10  -4   62.77   23.15   1
  10 -10  -4   95.99   21.11   4
   9 -10  -4  -10.98   13.54   1
  -9  10   4    1.22   13.64   2
   9 -10  -4   21.21   12.04   4
   8 -10  -4   38.02   15.64   4
  -8  10   4   54.53   17.78   2
   8 -10  -4   50.00   18.63   1
  -7  10   4  741.38   62.55   2
   7 -10  -4  750.69   60.81   1
   7 -10  -4  791.55   55.90   4
   6 -10  -4  400.27   40.04   1
  -6  10   4  429.32   40.30   2
   6 -10  -4  450.33   38.11   4
   5 -10  -4   55.55   17.38   1
  -5  10   4   18.06   12.47   2
   5 -10  -4   28.72   14.01   4
   4 -10  -4  534.70   40.63   4
   4 -10  -4  512.43   43.87   1
  -4  10   4  490.09   43.98   2
   3 -10  -4   28.33   14.38   1
  -3  10   4    3.62   10.43   2
   3 -10  -4   18.76   13.19   4
   2 -10  -4   39.06   13.64   1
  -2  10   4   39.45   12.54   2
   1 -10  -4   45.16   14.22   1
  -1  10   4   51.58   13.61   2
   0  10   4  780.18   61.00   2
   0 -10  -4  775.58   58.53   1
   1  10   4  998.55   73.33   2
  -1 -10  -4  980.86   71.44   3
  -1 -10  -4  885.62   68.54   1
  -2 -10  -4  149.88   22.29   1
   2  10   4  129.49   20.80   2
  -2 -10  -4  134.57   17.57   3
  -3 -10  -4  179.65   21.75   3
   3  10   4  188.70   24.84   2
  -4 -10  -4    1.31    6.57   3
   4  10   4    7.62   10.24   2
   5  10   4  446.67   42.21   2
  -5 -10  -4  476.10   40.96   3
   6  10   4   27.59   13.93   2
  -6 -10  -4   19.77   10.05   3
  -7 -10  -4  481.52   45.11   3
   7  10   4  539.27   47.33   2
   8  10   4  873.75   73.14   2
  -8 -10  -4  925.11   73.38   3
   9  10   4   45.92   16.50   2
  -9 -10  -4   38.57   14.57   3
  10  10   4   98.61   20.93   2
 -10 -10  -4  113.63   21.11   3
 -11 -10  -4   13.55   10.09   3
 -12 -10  -4  334.14   36.89   3
 -12  11   4  195.72   32.15   2
  11 -11  -4   12.77   17.18   1
  11 -11  -4   38.60   16.10   4
 -11  11   4    5.47   16.26   2
 -10  11   4   33.92   17.57   2
  10 -11  -4   11.35   15.18   4
  10 -11  -4  -12.67   14.93   1
   9 -11  -4  688.36   59.24   1
   9 -11  -4  684.12   54.15   4
  -9  11   4  652.23   59.64   2
  -8  11   4   50.71   16.37   2
   8 -11  -4   41.60   15.41   4
   8 -11  -4   31.10   16.00   1
   7 -11  -4   32.38   15.38   1
  -7  11   4   17.23   13.00   2
   7 -11  -4   20.30   15.29   4
  -6  11   4   90.46   18.93   2
   6 -11  -4   63.10   17.58   1
   6 -11  -4   57.45   17.17   4
   5 -11  -4  468.36   38.38   4
   5 -11  -4  432.10   40.73   1
  -5  11   4  405.40   40.38   2
  -4  11   4  243.84   29.16   2
   4 -11  -4  266.70   33.20   1
   4 -11  -4  264.45   29.47   4
  -3  11   4    0.40    9.91   2
   3 -11  -4    2.85   12.23   1
   2 -11  -4 1073.00   79.66   1
  -2  11   4 1132.49   83.51   2
  -1  11   4   49.96   14.15   2
   1 -11  -4   64.79   17.87   1
   0 -11  -4  356.27   34.04   1
   0  11   4  326.14   32.86   2
   1  11   4  231.32   26.57   2
  -1 -11  -4  190.52   27.59   1
   2  11   4  322.31   32.53   2
  -2 -11  -4  342.25   30.20   3
  -2 -11  -4  305.23   35.37   1
  -3 -11  -4  723.55   57.78   3
   3  11   4  745.95   60.48   2
   4  11   4   -7.44    9.82   2
  -4 -11  -4   -4.06    6.05   3
  -5 -11  -4  357.74   34.27   3
   5  11   4  373.05   37.04   2
   6  11   4  178.72   26.90   2
  -6 -11  -4  199.87   24.95   3
  -7 -11  -4  295.72   31.22   3
   7  11   4  273.99   31.22   2
  -8 -11  -4   32.12   12.40   3
   8  11   4   36.64   16.54   2
   9  11   4   91.89   21.40   2
  -9 -11  -4   90.40   17.91   3
 -10 -11  -4  491.18   46.50   3
 -11 -11  -4   59.83   16.66   3
 -12 -11  -4   63.32   17.25   3
 -11  12   4  346.68   44.13   2
 -10  12   4  112.07   25.87   2
  10 -12  -4  108.77   26.25   1
  10 -12  -4  120.49   24.91   4
  -9  12   4   17.79   15.10   2
   9 -12  -4   24.30   16.98   1
   9 -12  -4    5.41   15.05   4
   8 -12  -4   -4.05   13.48   1
  -8  12   4   13.18   14.12   2
   8 -12  -4  -12.34   12.84   4
   7 -12  -4  754.85   64.65   1
  -7  12   4  743.46   65.63   2
   7 -12  -4  877.00   61.31   4
   6 -12  -4   30.16   14.55   4
   6 -12  -4   39.43   16.21   1
  -6  12   4   28.61   14.59   2
  -5  12   4  -12.14   10.53   2
   5 -12  -4   13.46   13.85   1
   4 -12  -4  185.39   28.32   1
  -4  12   4  163.60   24.55   2
  -3  12   4   14.95   12.42   2
   3 -12  -4   25.46   15.15   1
   2 -12  -4  257.03   32.94   1
  -2  12   4  236.29   29.20   2
  -1  12   4   19.35   12.90   2
   1 -12  -4    2.90   12.83   1
   0  12   4  750.92   59.67   2
   0 -12  -4  716.25   58.39   1
  -1 -12  -4   99.72   19.54   1
   1  12   4   61.42   16.15   2
   2  12   4   30.83   13.23   2
   3  12   4  208.16   26.94   2
  -4 -12  -4   60.53   12.85   3
   4  12   4   38.40   14.13   2
   5  12   4  396.84   39.70   2
  -5 -12  -4  422.90   38.38   3
   6  12   4    2.97   11.61   2
  -6 -12  -4    8.11    9.41   3
   7  12   4  263.22   33.61   2
  -7 -12  -4  294.05   31.29   3
  -8 -12  -4  129.00   21.34   3
   8  12   4  100.93   21.50   2
   9  12   4   81.29   19.57   2
  -9 -12  -4   80.13   18.05   3
 -10 -12  -4   55.31   14.34   3
 -11 -12  -4   54.45   14.05   3
 -10  13   4   36.16   19.03   2
   9 -13  -4  476.87   48.48   4
  -9  13   4  477.87   49.63   2
   9 -13  -4  532.27   50.40   1
   8 -13  -4  119.37   25.14   4
  -8  13   4   92.11   21.39   2
   8 -13  -4   59.08   22.61   1
  -7  13   4   20.34   14.83   2
   7 -13  -4   41.71   18.78   1
  -6  13   4  106.25   21.75   2
   6 -13  -4  104.66   24.54   1
   5 -13  -4  412.44   41.12   1
  -5  13   4  367.25   38.91   2
  -4  13   4  174.42   26.80   2
   4 -13  -4  231.48   32.49   1
  -3  13   4    1.37   10.67   2
   3 -13  -4    5.89   13.09   1
   2 -13  -4  317.46   39.44   1
  -2  13   4  412.80   37.30   2
   1 -13  -4   30.20   15.19   1
  -1  13   4   25.71   11.89   2
   0  13   4   80.78   17.93   2
   0 -13  -4   60.22   19.14   1
   1  13   4   71.38   17.02   2
   2  13   4  255.78   30.70   2
   3  13   4  319.52   33.07   2
   4  13   4   15.62   12.44   2
   5  13   4  194.03   27.32   2
  -6 -13  -4   40.51   12.54   3
   6  13   4   24.13   14.85   2
   7  13   4  194.16   28.28   2
  -7 -13  -4  196.73   26.28   3
   8  13   4  -15.90   14.03   2
  -8 -13  -4   17.10   10.47   3
  -9 -13  -4   55.06   14.73   3
 -10 -13  -4  193.16   28.38   3
  -8  14   4   17.37   14.87   2
   8 -14  -4   12.92   15.27   1
   7 -14  -4  437.66   48.58   1
  -7  14   4  336.41   39.48   2
  -6  14   4   19.02   14.55   2
   6 -14  -4    3.35   14.48   1
   5 -14  -4   18.69   16.04   1
  -5  14   4   31.04   15.02   2
  -4  14   4  109.17   21.32   2
   4 -14  -4  134.85   24.92   1
   3 -14  -4  208.61   32.60   1
  -3  14   4  202.73   27.28   2
   2 -14  -4  279.09   37.76   1
  -2  14   4  359.73   34.35   2
  -1  14   4   33.88   13.02   2
   1 -14  -4   -4.42   12.37   1
   0  14   4  268.74   29.96   2
   1  14   4   24.92   12.60   2
   2  14   4   47.41   14.71   2
   3  14   4  104.62   19.20   2
   4  14   4  514.29   47.32   2
   5  14   4  306.15   33.10   2
   6  14   4  -14.32   12.88   2
   7  14   4  126.37   22.61   2
  -9 -14  -4  117.59   22.21   3
  -6  15   4   54.91   18.00   2
   6 -15  -4   58.94   21.88   1
  -5  15   4  416.43   41.31   2
   5 -15  -4  368.50   46.55   1
   4 -15  -4   71.82   20.48   1
  -4  15   4   34.71   15.70   2
  -3  15   4    7.17   12.31   2
   3 -15  -4   66.30   19.60   1
   2 -15  -4  110.78   24.22   1
  -2  15   4  138.49   22.26   2
  -1  15   4   11.62   11.18   2
   0  15   4   95.54   18.87   2
   1  15   4   13.13   11.50   2
   2  15   4  320.97   33.68   2
   3  15   4   91.87   19.03   2
   4  15   4   12.07   11.84   2
   5  15   4  149.50   24.17   2
   6  15   4   -2.83   11.13   2
   7  15   4  195.82   26.68   2
   5 -16  -4   21.35   15.56   1
   4 -16  -4   58.21   22.31   1
   3 -16  -4  336.06   42.16   1
  -2  16   4   57.66   15.86   2
  -1  16   4    3.56   11.32   2
   0  16   4  258.12   32.75   2
   1  16   4   31.56   14.77   2
   2  16   4   89.62   19.47   2
   3  16   4    5.60   11.50   2
   4  16   4  176.34   24.85   2
  -2 -14   5    8.13   23.66   1
  -1 -14   5   60.75   27.41   1
   0 -14   5  172.94   33.47   1
  -1  14  -5    6.13   11.94   2
   1 -14   5   -9.91   17.55   1
  -2  14  -5   66.76   16.42   2
  -3  14  -5   14.79   12.59   2
  -4  14  -5   71.23   16.34   2
  -4 -13   5  -61.79   20.67   1
  -3 -13   5   95.10   32.61   1
  -2 -13   5   46.54   26.87   1
  -1 -13   5   13.07   23.28   1
   0 -13   5   24.35   21.07   1
  -1  13  -5   26.91   12.62   2
   1 -13   5   11.12   20.40   1
  -2  13  -5  210.60   25.33   2
   2 -13   5  110.38   27.83   1
   3 -13   5   17.00   19.45   1
  -3  13  -5    0.83   11.34   2
  -4  13  -5   77.70   17.19   2
   4 -13   5   45.51   23.14   1
   5 -13   5   90.94   25.67   1
  -5  13  -5  146.24   22.20   2
   6 -13   5   43.47   21.64   1
  -6  13  -5   54.51   15.94   2
  -5 -12   5   61.51   29.49   1
  -4 -12   5   -4.63   22.64   1
  -3 -12   5   34.29   25.16   1
  -2 -12   5   26.61   22.57   1
  -1 -12   5  131.74   31.11   1
   0  12  -5  397.50   32.92   2
   0 -12   5  241.59   41.97   1
   1 -12   5   35.26   20.63   1
  -1  12  -5   31.48   11.88   2
   2 -12   5   44.16   20.47   1
  -2  12  -5   44.90   13.41   2
  -3  12  -5    0.74   10.66   2
   3 -12   5   11.57   18.42   1
   4 -12   5  206.41   34.79   1
  -4  12  -5  242.52   26.60   2
  -5  12  -5   13.84   11.31   2
   5 -12   5    4.57   17.74   1
   6 -12   5  130.90   29.65   1
  -6  12  -5  190.70   25.73   2
  -7  12  -5  119.62   21.85   2
   7 -12   5   93.56   23.10   1
  -8  12  -5   29.05   14.74   2
   8 -12   5    6.37   16.68   1
   9  11  -5   82.55   23.67   3
   8  11  -5   43.43   17.71   3
  -6 -11   5   78.33   28.24   1
  -5 -11   5   52.32   27.14   1
  -4 -11   5   12.80   22.18   1
  -3 -11   5  220.62   40.30   1
  -2 -11   5   38.71   23.95   1
  -1 -11   5   89.51   23.67   1
   1  11  -5   78.31   15.29   2
   0 -11   5   49.99   21.02   1
   0  11  -5   65.96   14.22   2
  -1  11  -5  145.90   20.77   2
   1 -11   5  151.20   29.64   1
  -2  11  -5  595.53   46.37   2
   2 -11   5  487.64   51.40   1
   3 -11   5   24.28   18.34   1
  -3  11  -5   17.03   11.55   2
  -4  11  -5  234.38   25.98   2
   4 -11   5  212.36   36.08   1
   5 -11   5  128.30   27.34   1
  -5  11  -5  197.46   25.13   2
  -6  11  -5  204.78   26.78   2
   6 -11   5  155.92   30.55   1
   7 -11   5   14.95   13.59   1
  -7  11  -5   22.88   13.06   2
   8 -11   5   -7.23   14.63   1
  -8  11  -5   24.08   13.96   2
  -9  11  -5  330.55   35.11   2
   9 -11   5  276.19   42.17   1
  10 -11   5    0.47   14.91   1
   9  10  -5    7.98   17.07   3
   8  10  -5  294.40   40.79   3
   7  10  -5   77.57   21.53   3
  -7 -10   5   69.10   29.06   1
   6  10  -5   23.75   14.15   3
  -6 -10   5   33.38   25.74   1
  -5 -10   5  142.99   33.34   1
  -4 -10   5   10.78   21.60   1
  -3 -10   5  254.40   42.08   1
  -2 -10   5   -2.48   21.75   1
   1  10  -5  252.99   24.20   2
  -1 -10   5  171.68   34.82   1
   0 -10   5   95.82   25.51   1
   0  10  -5  143.64   18.65   2
  -1  10  -5   90.10   16.11   2
   1 -10   5  115.76   24.36   1
  -2  10  -5  119.21   18.57   2
   2 -10   5  114.41   26.80   1
   3 -10   5   16.24   16.81   1
  -3  10  -5   14.17   10.73   2
   4 -10   5  368.44   46.61   1
  -4  10  -5  513.38   40.76   2
   5 -10   5  -10.52   13.07   1
  -5  10  -5    3.49   11.48   2
   6 -10   5   82.86   21.38   1
  -6  10  -5  100.84   18.74   2
  -7  10  -5   83.69   17.88   2
   7 -10   5   94.96   21.59   1
  -8  10  -5   39.74   14.76   2
   8 -10   5   45.75   16.00   1
   9 -10   5   11.87   13.17   1
  -9  10  -5   -3.57   11.54   2
 -10  10  -5   11.44   15.59   2
  10 -10   5    0.64   13.87   1
 -11  10  -5  453.00   47.01   2
  11 -10   5  450.80   52.87   1
  10   9  -5  246.79   38.99   3
   9   9  -5    6.68   15.58   3
  -8  -9   5   32.48   24.14   1
   8   9  -5  -11.48   13.53   3
  -7  -9   5   26.26   22.91   1
   7   9  -5   79.38   20.32   3
   6   9  -5  347.54   37.12   3
  -6  -9   5  300.94   45.44   1
   5   9  -5  557.17   47.45   3
  -5  -9   5  396.28   51.81   1
   4   9  -5   -0.67   10.98   3
  -4  -9   5  -15.30   19.82   1
  -3  -9   5  253.28   41.42   1
   2   9  -5    5.84    7.87   2
  -2  -9   5  -21.08   19.87   1
   1   9  -5   86.77   14.25   2
  -1  -9   5   49.25   23.11   1
   0  -9   5    8.85   18.20   1
   0   9  -5   22.53    9.74   2
  -1   9  -5  346.74   32.52   2
   1  -9   5  391.01   45.32   1
   2  -9   5  659.31   58.83   1
  -2   9  -5  671.04   52.28   2
  -3   9  -5    9.16    9.79   2
   3  -9   5   17.79   16.27   1
   4  -9   5  294.12   38.00   1
  -4   9  -5  311.87   30.33   2
   5  -9   5   30.17   17.11   1
  -5   9  -5   48.49   14.50   2
   6  -9   5  484.45   48.21   1
  -6   9  -5  522.21   45.09   2
  -7   9  -5   -4.05   10.82   2
   7  -9   5  -16.21   11.45   1
   8  -9   5  139.45   28.27   1
  -8   9  -5  214.64   27.55   2
   9  -9   5  252.34   36.28   1
  -9   9  -5  258.91   32.82   2
  10  -9   5   15.38   14.02   1
 -10   9  -5   78.63   21.53   2
  11  -9   5   -8.58   13.45   1
 -11   9  -5  -10.16   15.36   2
  12  -9   5   42.69   19.16   1
 -12   9  -5   10.92   14.40   2
  11   8  -5  130.93   27.33   3
  10   8  -5   37.37   17.92   3
  -9  -8   5   49.34   20.51   1
   9   8  -5   14.56   16.37   3
  -8  -8   5  158.11   31.50   1
   8   8  -5  171.65   29.31   3
   7   8  -5   38.81   17.54   3
  -7  -8   5   93.71   24.52   1
   6   8  -5   21.64   13.67   3
  -6  -8   5   29.46   22.83   1
  -5  -8   5  284.17   41.47   1
   5   8  -5  279.90   31.64   3
  -4  -8   5  225.27   38.02   1
   4   8  -5  271.22   29.36   3
  -3  -8   5  221.78   38.20   1
   3   8  -5  245.34   26.11   3
   2   8  -5   22.46   10.25   3
   2   8  -5   17.52    8.79   2
  -2  -8   5   19.26   21.55   1
  -1  -8   5  315.93   42.09   1
   1   8  -5  342.36   29.46   2
   0   8  -5  165.08   20.04   2
   0  -8   5  202.06   34.19   1
   1  -8   5   58.14   20.74   1
  -1   8  -5   84.25   14.51   2
   2  -8   5  214.08   32.59   1
  -2   8  -5  166.07   21.15   2
  -3   8  -5   72.70   14.96   2
   3  -8   5   57.74   20.06   1
   4  -8   5  410.81   43.46   1
  -4   8  -5  522.78   40.81   2
  -5   8  -5  227.72   25.38   2
   5  -8   5  224.40   32.73   1
  -6   8  -5   41.19   14.76   2
   6  -8   5   45.50   17.00   1
  -7   8  -5  131.50   21.67   2
   7  -8   5  113.51   24.56   1
  -8   8  -5  334.75   33.54   2
   8  -8   5  291.59   39.29   1
  -9   8  -5    3.03   12.74   2
   9  -8   5   14.05   14.05   1
  10  -8   5  141.79   25.34   1
 -10   8  -5  105.58   23.63   2
  11  -8   5  464.42   45.06   1
 -11   8  -5  419.60   45.43   2
 -12   8  -5   21.21   16.84   2
  12  -8   5   20.82   17.22   1
 -13   8  -5   26.90   18.12   2
  13  -8   5    3.19   16.45   1
  12   7  -5  209.19   35.31   3
  11   7  -5   18.99   16.98   3
 -10  -7   5  266.09   33.95   1
  10   7  -5  220.43   35.18   3
   9   7  -5   37.71   18.26   3
  -9  -7   5   77.61   20.87   1
  -8  -7   5   77.43   22.44   1
   8   7  -5   30.96   17.04   3
   7   7  -5   13.79   12.95   3
  -7  -7   5   27.90   20.67   1
   6   7  -5 1014.88   78.84   3
  -6  -7   5  899.33   75.74   1
   5   7  -5  428.34   39.57   3
  -5  -7   5  364.17   46.95   1
   4   7  -5   82.41   17.49   3
  -4  -7   5  104.13   26.76   1
  -3  -7   5  198.93   34.33   1
   3   7  -5  162.43   22.69   3
   3   7  -5  167.58   17.69   2
   2   7  -5   24.59    8.33   2
   2   7  -5   45.69   11.53   3
  -2  -7   5   24.60   21.34   1
  -1  -7   5  841.64   69.10   1
   1   7  -5  801.65   62.00   3
   1   7  -5  767.43   58.66   2
   0  -7   5   39.94   20.45   1
   0   7  -5   42.97   10.51   2
   0   7  -5   52.19   11.61   3
  -1   7  -5  761.68   59.55   2
   1  -7   5  856.75   66.06   1
   2  -7   5  262.82   34.75   1
  -2   7  -5  286.11   25.98   2
  -3   7  -5   69.32   13.73   2
   3  -7   5   80.81   20.05   1
   4  -7   5   42.42   15.87   1
  -4   7  -5   55.59   13.70   2
  -5   7  -5   11.82   10.87   2
   5  -7   5   12.53   12.77   1
  -6   7  -5  940.86   73.86   2
   6  -7   5 1006.86   75.19   1
  -7   7  -5   18.03   12.40   2
   7  -7   5   41.12   16.22   1
   8  -7   5  368.88   42.36   1
  -8   7  -5  379.80   37.03   2
   9  -7   5  442.02   42.97   1
  -9   7  -5  417.23   41.66   2
 -10   7  -5   94.17   21.84   2
  10  -7   5   76.86   18.68   1
  11  -7   5   13.51   13.74   1
 -11   7  -5    2.66   13.44   2
 -12   7  -5   34.36   17.87   2
  12  -7   5   36.28   16.49   1
 -13   7  -5  321.06   41.43   2
  13  -7   5  243.62   34.83   1
 -14   7  -5  109.12   25.06   2
  14  -7   5   90.97   22.42   1
  12   6  -5   32.80   18.40   3
  11   6  -5  315.03   43.00   3
 -11  -6   5  323.78   36.77   1
 -10  -6   5   39.47   18.25   1
  10   6  -5   54.54   18.33   3
   9   6  -5    6.66   14.66   3
  -9  -6   5   20.33   15.90   1
   8   6  -5  521.66   47.47   3
  -8  -6   5  397.92   41.90   1
   7   6  -5    3.48   12.63   3
  -7  -6   5   30.52   18.53   1
   6   6  -5    2.12   12.58   3
  -6  -6   5    4.29   17.71   1
   5   6  -5   -9.01    8.29   3
  -5  -6   5    8.69   20.30   1
  -4  -6   5  409.91   47.09   1
   4   6  -5  384.49   36.90   3
   3   6  -5  202.05   24.50   3
  -3  -6   5  254.65   37.01   1
   3   6  -5  241.53   20.87   2
   2   6  -5   37.59   10.40   3
   2   6  -5   16.92    7.33   2
  -2  -6   5   30.17   20.51   1
   1   6  -5 1533.07  109.71   2
  -1  -6   5 1665.35  113.52   1
   1   6  -5 1583.40  115.06   3
   0  -6   5   59.54   19.90   1
   0   6  -5   42.66    9.77   2
   0   6  -5   38.11    9.57   3
  -1   6  -5  419.61   35.81   2
   1  -6   5  430.65   42.35   1
  -1   6  -5  525.75   38.18   3
   2  -6   5   29.88   15.92   1
  -2   6  -5   27.64   10.12   2
   3  -6   5  311.44   35.76   1
  -3   6  -5  349.19   29.69   2
  -4   6  -5  772.09   58.83   2
   4  -6   5  779.73   60.50   1
   5  -6   5   58.90   17.84   1
  -5   6  -5   58.42   13.57   2
   6  -6   5  324.82   36.58   1
  -6   6  -5  331.90   31.95   2
   7  -6   5  123.48   23.85   1
  -7   6  -5  104.25   18.98   2
   8  -6   5 1019.25   74.95   1
  -8   6  -5  910.42   74.88   2
   9  -6   5   20.14   13.73   1
  -9   6  -5   -3.00   12.08   2
 -10   6  -5  240.65   31.95   2
  10  -6   5  241.30   33.04   1
 -11   6  -5  527.93   47.96   2
  11  -6   5  397.27   46.58   1
 -12   6  -5    3.33   15.22   2
  12  -6   5   10.55   13.07   1
  13  -6   5   36.72   16.20   1
  13  -6   5   62.91   16.79   4
 -13   6  -5   35.06   19.19   2
 -14   6  -5   87.20   24.94   2
  14  -6   5   78.31   16.73   4
  14  -6   5   27.12   18.90   1
  13   5  -5  525.40   54.32   3
  12   5  -5    1.76   12.53   3
  11   5  -5    8.02   15.38   3
 -11  -5   5   28.73   15.96   1
  10   5  -5  257.43   36.52   3
 -10  -5   5  290.60   33.25   1
  -9  -5   5  124.31   22.71   1
   9   5  -5  112.49   22.99   3
   8   5  -5  336.95   37.19   3
  -8  -5   5  351.72   37.50   1
   7   5  -5   52.84   14.02   3
  -7  -5   5   30.37   18.48   1
  -6  -5   5  836.11   67.16   1
   6   5  -5  896.55   70.85   3
   5   5  -5   40.11   13.22   3
  -5  -5   5   54.72   21.80   1
   4   5  -5   34.20    6.61   2
  -4  -5   5   20.78   18.18   1
   4   5  -5   28.97   11.77   3
   3   5  -5  241.76   25.13   3
  -3  -5   5  275.25   36.30   1
   3   5  -5  212.34   20.17   2
  -2  -5   5  406.51   43.38   1
   2   5  -5  362.87   33.30   3
   2   5  -5  382.54   29.57   2
   1   5  -5  710.17   54.73   3
  -1  -5   5  784.91   60.37   1
   1   5  -5  627.81   50.54   2
   0  -5   5  -10.57   13.77   1
   0   5  -5    0.79    6.23   3
   0   5  -5   -6.15    5.26   2
  -1   5  -5  454.29   37.44   2
  -1   5  -5  505.88   39.87   3
   1  -5   5  520.49   44.23   1
   2  -5   5   58.56   17.39   1
  -2   5  -5  102.96   13.10   3
  -2   5  -5   83.79   12.52   2
  -3   5  -5  119.28   15.59   2
  -3   5  -5  115.20   13.21   3
   3  -5   5  131.75   22.12   1
   4  -5   5   42.01   15.34   1
  -4   5  -5   41.85   10.73   2
  -5   5  -5  559.55   43.96   2
   5  -5   5  522.90   45.54   1
  -6   5  -5  707.57   51.66   2
   6  -5   5  572.35   50.52   1
  -7   5  -5    8.79   10.44   2
   7  -5   5   11.60   11.68   1
   8  -5   5  306.71   35.50   1
  -8   5  -5  346.82   33.86   2
   9  -5   5  374.27   39.97   1
  -9   5  -5  372.07   37.97   2
 -10   5  -5  704.80   61.42   2
  10  -5   5  754.86   54.20   4
  10  -5   5  717.56   59.11   1
  11  -5   5   -1.33   11.04   1
  11  -5   5   36.34   14.97   4
 -11   5  -5   15.84   15.18   2
  12  -5   5   26.91   11.92   4
 -12   5  -5   29.76   16.25   2
  12  -5   5    8.22   11.27   1
  13  -5   5  669.26   51.73   4
  13  -5   5  680.44   57.26   1
 -13   5  -5  649.37   62.28   2
  14  -5   5   23.48   16.26   1
  14  -5   5   50.83   15.17   4
 -14   5  -5   46.80   21.68   2
 -15   5  -5   18.35   18.64   2
  13   4  -5   19.34   14.63   3
 -12  -4   5   29.46   14.19   1
  12   4  -5   -3.72   10.49   3
 -11  -4   5  515.55   43.58   1
  11   4  -5  506.54   50.18   3
  10   4  -5   63.05   17.22   3
 -10  -4   5   68.25   19.03   1
   9   4  -5   80.53   20.28   3
  -9  -4   5  103.06   20.82   1
   8   4  -5  935.99   77.87   3
  -8  -4   5  970.71   69.56   1
   7   4  -5    7.98   10.87   3
  -7  -4   5   19.51   15.80   1
   6   4  -5   27.86   11.14   3
  -6  -4   5   18.98   14.66   1
  -5  -4   5  -14.11   13.07   1
   5   4  -5   13.75    9.76   3
  -4  -4   5  460.67   45.89   1
   4   4  -5  524.25   38.87   2
   4   4  -5  650.59   47.20   3
   3   4  -5  641.62   51.63   3
  -3  -4   5  689.86   55.00   1
   3   4  -5  602.59   45.33   2
   2   4  -5   20.07    8.58   3
  -2  -4   5    7.97   15.21   1
   2   4  -5   14.28    5.17   2
  -1  -4   5 1139.54   79.17   1
   1   4  -5  955.35   78.18   3
   1   4  -5 1110.39   73.86   2
   0   4  -5   -4.74    5.05   2
   0  -4   5    4.93   13.70   1
   0   4  -5   13.88    7.25   3
   1  -4   5 1598.58   97.63   1
  -1   4  -5 1262.29   96.31   2
  -1   4  -5 1347.90  101.24   3
  -2   4  -5  350.28   29.19   3
   2  -4   5  326.45   33.90   1
  -2   4  -5  327.69   27.60   2
  -3   4  -5 1578.88  102.22   3
  -3   4  -5 1462.30  100.16   2
   3  -4   5 1261.14   95.75   1
  -4   4  -5  830.14   59.51   2
   4  -4   5  768.29   58.75   1
  -5   4  -5   37.63   10.74   2
  -5   4  -5   29.96    5.81   3
   5  -4   5   46.45   14.08   1
   6  -4   5  105.65   19.60   1
  -6   4  -5   87.42   15.79   2
  -7   4  -5    4.87   10.06   2
   7  -4   5    5.56   10.52   1
  -8   4  -5 1043.96   77.45   2
   8  -4   5  961.00   72.75   1
   9  -4   5    6.74   11.08   1
   9  -4   5   -8.69    8.31   4
  -9   4  -5  -11.62   11.19   2
  10  -4   5  456.61   42.36   1
 -10   4  -5  437.45   44.21   2
  10  -4   5  499.84   39.60   4
 -11   4  -5  858.05   71.97   2
  11  -4   5  871.38   66.96   1
  11  -4   5  868.44   60.58   4
 -12   4  -5  104.47   23.76   2
  12  -4   5   77.84   18.34   1
  12  -4   5   96.14   18.15   4
  13  -4   5   30.76   15.30   1
  13  -4   5   64.84   15.13   4
 -13   4  -5   53.10   20.15   2
 -14   4  -5   23.84   16.99   2
 -15   4  -5  284.15   40.46   2
  14   3  -5   54.75   18.06   3
 -13  -3   5  260.00   30.05   1
  13   3  -5  246.66   34.48   3
 -12  -3   5    4.10   12.36   1
  12   3  -5    8.57   11.71   3
 -11  -3   5   21.07   13.75   1
  11   3  -5   57.24   16.15   3
 -10  -3   5  237.01   27.62   1
  10   3  -5  192.35   29.85   3
  -9  -3   5  695.08   53.01   1
   9   3  -5  693.87   60.98   3
  -8  -3   5  375.33   32.83   1
   8   3  -5  282.87   33.29   3
  -7  -3   5   52.17   15.35   1
   7   3  -5   39.70   14.00   3
  -6  -3   5  819.78   60.61   1
   6   3  -5  846.87   67.03   3
   5   3  -5   -9.08    6.90   3
  -5  -3   5   -4.13   11.98   1
   4   3  -5   14.14    3.93   2
  -4  -3   5   24.81   14.31   1
   4   3  -5   10.43    8.84   3
  -3  -3   5  187.95   27.01   1
   3   3  -5  195.68   20.80   3
   3   3  -5  155.86   14.37   2
   2   3  -5 1077.17   77.42   3
   2   3  -5 1060.88   70.90   2
  -2  -3   5  981.49   74.64   1
  -1  -3   5  244.99   31.80   1
   1   3  -5  270.03   21.26   2
   1   3  -5  302.76   26.09   3
   0   3  -5  153.22   14.64   2
   0   3  -5  155.04   18.21   3
   0  -3   5  159.46   24.92   1
   1  -3   5 1227.13   84.14   1
  -1   3  -5 1250.75   84.20   2
  -1   3  -5 1180.41   89.22   3
   2  -3   5   38.72   13.79   1
  -2   3  -5   21.45    8.93   3
  -2   3  -5   35.07    8.22   2
  -3   3  -5 1168.57   78.08   3
   3  -3   5 1088.75   74.79   1
  -3   3  -5  984.23   75.91   2
  -4   3  -5    4.00    4.29   3
  -4   3  -5   -1.36    6.63   2
   4  -3   5   -0.51    8.92   1
   5  -3   5  555.06   42.75   1
  -5   3  -5  539.16   42.38   2
  -5   3  -5  509.39   39.95   3
   6  -3   5 1817.63  118.96   1
  -6   3  -5 1833.01  127.56   2
  -6   3  -5 1796.67  127.00   3
  -7   3  -5   10.79    4.97   3
   7  -3   5   -1.27    8.56   4
  -7   3  -5    1.63    9.13   2
   7  -3   5    3.11    9.45   1
   8  -3   5  239.51   27.84   1
  -8   3  -5  226.98   27.40   2
   8  -3   5  241.81   25.34   4
  -9   3  -5   81.72   18.90   2
   9  -3   5   87.64   17.28   4
   9  -3   5   90.57   18.94   1
 -10   3  -5  649.86   59.02   2
  10  -3   5  704.72   49.91   4
  10  -3   5  743.43   55.68   1
 -11   3  -5   12.89   15.38   2
  11  -3   5   23.11   13.89   1
  11  -3   5    0.49   11.35   4
  12  -3   5  110.03   22.96   1
 -12   3  -5  158.31   26.69   2
  12  -3   5  111.98   19.77   4
 -13   3  -5  750.04   71.59   2
  13  -3   5  890.26   67.52   1
  13  -3   5  930.10   61.11   4
 -14   3  -5   28.41   16.25   2
 -15   3  -5    8.62   16.10   2
 -16   3  -5   52.26   19.42   2
  14   2  -5   95.38   20.30   3
 -14  -2   5   63.96   16.69   1
 -13  -2   5   16.33   12.47   1
  13   2  -5    3.47   12.08   3
  12   2  -5   16.67   12.93   3
 -12  -2   5    8.05   13.36   1
  11   2  -5  896.98   74.69   3
 -11  -2   5  836.78   62.69   1
  10   2  -5   58.98   16.96   3
 -10  -2   5   85.80   17.28   1
   9   2  -5   97.42   20.09   3
  -9  -2   5  105.30   19.19   1
  -8  -2   5  501.33   37.77   1
   8   2  -5  373.61   40.08   3
   7   2  -5  382.06   34.71   3
  -7  -2   5  304.72   30.11   1
   6   2  -5  185.73   25.24   3
  -6  -2   5  256.37   25.54   1
  -5  -2   5   23.09   11.51   1
   5   2  -5   19.22    9.75   3
   4   2  -5 1689.51  134.23   3
  -4  -2   5 2065.41  122.11   1
   3   2  -5 1178.98   83.40   3
  -3  -2   5 1063.11   76.77   1
  -2  -2   5   11.93   13.18   1
   2   2  -5   11.45    3.73   2
   2   2  -5   10.90    7.76   3
   1   2  -5   94.33   13.74   3
  -1  -2   5   88.96   19.18   1
   1   2  -5   73.65    8.74   2
   0   2  -5  184.76   15.84   2
   0  -2   5  212.67   25.10   1
   0   2  -5  167.92   20.14   3
  -1   2  -5  237.50   25.58   3
  -1   2  -5  287.76   21.96   2
   1  -2   5  284.41   27.58   1
  -2   2  -5    9.39    5.51   2
  -2   2  -5   -6.06    6.34   3
   2  -2   5    9.10    9.75   1
   3  -2   5 2110.00  144.05   1
  -3   2  -5 2397.39  155.30   2
  -3   2  -5 2345.88  159.24   3
  -4   2  -5  621.75   47.76   3
  -4   2  -5  740.52   49.33   2
   4  -2   5  576.35   46.68   1
  -5   2  -5   92.33   11.62   3
   5  -2   5   90.92   15.48   1
  -5   2  -5   98.26   14.39   2
  -6   2  -5  537.21   42.55   2
   6  -2   5  529.93   40.74   1
  -6   2  -5  495.23   39.82   3
  -7   2  -5  269.77   27.56   2
  -7   2  -5  271.09   24.43   3
   7  -2   5  262.58   24.22   4
   7  -2   5  304.41   27.36   1
  -8   2  -5  529.35   41.08   3
  -8   2  -5  461.57   43.10   2
   8  -2   5  516.91   37.84   4
   8  -2   5  531.54   41.43   1
   9  -2   5   57.18   15.86   1
  -9   2  -5   60.95   17.10   2
   9  -2   5   62.00   14.16   4
  -9   2  -5   55.39   10.99   3
  10  -2   5  288.16   29.28   1
 -10   2  -5  312.45   34.25   2
  10  -2   5  276.94   27.52   4
 -11   2  -5  584.51   54.22   2
  11  -2   5  708.36   52.18   1
  11  -2   5  586.45   44.76   4
  12  -2   5  335.07   29.57   4
  12  -2   5  374.19   35.03   1
 -12   2  -5  339.17   38.76   2
 -13   2  -5   36.45   17.85   2
 -14   2  -5    9.04   15.07   2
 -15   2  -5  552.18   54.38   2
 -16   2  -5   23.87   17.72   2
  15   1  -5   42.00   18.60   3
  14   1  -5   43.51   14.88   3
 -14  -1   5   46.42   15.53   1
  13   1  -5  413.67   43.22   3
 -13  -1   5  421.49   36.72   1
 -12  -1   5   29.52   12.41   1
  12   1  -5   17.31   13.07   3
  11   1  -5   18.65   13.30   3
 -11  -1   5   20.04   11.80   1
  10   1  -5   -8.82   10.77   3
 -10  -1   5   30.71   12.98   1
  -9  -1   5  672.76   51.31   1
   9   1  -5  736.21   60.44   3
   8   1  -5   75.15   16.19   3
  -8  -1   5   80.38   16.22   1
   7   1  -5   25.27   11.07   3
  -7  -1   5   60.66   13.14   1
   6   1  -5 2095.12  145.19   3
  -6  -1   5 1905.49  126.61   1
  -5  -1   5  478.99   37.38   1
   5   1  -5  513.84   42.57   3
  -4  -1   5    1.09    9.35   1
   4   1  -5   12.25    8.46   3
  -3  -1   5   -0.91    9.45   1
   3   1  -5   21.45    8.74   3
  -1  -1   5  160.96   19.22   1
   1   1  -5   85.69    9.69   2
   1   1  -5   84.58   14.00   3
   0   1  -5   11.27    8.01   3
   0  -1   5   14.95   10.75   1
   0   1  -5    7.32    4.24   2
   1  -1   5 1986.51  124.78   1
  -1   1  -5 1922.23  131.52   2
   2  -1   5   52.01   12.33   1
  -2   1  -5   45.89    9.96   3
  -2   1  -5   47.56    8.24   2
  -3   1  -5 4872.93  323.46   3
   3  -1   5 4908.97  287.69   1
  -3   1  -5 4342.78  313.93   2
  -4   1  -5  401.99   33.42   3
   4  -1   5  457.08   33.45   1
  -4   1  -5  425.37   34.10   2
   5  -1   5 1260.38   83.66   1
  -5   1  -5 1345.78   91.14   2
  -5   1  -5 1241.94   91.43   3
   6  -1   5 1227.03   70.22   4
  -6   1  -5 1160.06   84.55   3
   6  -1   5 1154.20   77.57   1
  -6   1  -5 1144.44   84.36   2
  -7   1  -5   40.34    9.28   3
  -7   1  -5   35.12   11.24   2
   7  -1   5   53.27   11.55   4
   7  -1   5   47.03   11.97   1
   8  -1   5   77.89   15.23   1
  -8   1  -5   75.15   12.91   3
   8  -1   5   65.22   13.26   4
  -8   1  -5   91.89   16.65   2
   9  -1   5    4.75   10.77   1
  -9   1  -5   10.05    7.95   3
   9  -1   5   18.04    9.63   4
  -9   1  -5   27.22   12.43   2
 -10   1  -5  736.72   56.30   3
  10  -1   5  694.56   47.72   4
  10  -1   5  701.20   53.29   1
 -10   1  -5  648.85   56.75   2
  11  -1   5   42.67   10.30   4
 -11   1  -5   28.38   14.50   2
  11  -1   5   32.90   13.72   1
 -11   1  -5   22.30   11.00   3
 -12   1  -5  243.71   31.41   2
 -13   1  -5  412.72   42.71   2
 -14   1  -5   92.20   22.79   2
 -15   1  -5   12.18   14.88   2
 -15   0   5  138.01   21.28   1
  15   0  -5  168.71   26.31   3
  14   0  -5  360.38   39.13   3
 -14   0   5  346.71   32.69   1
 -13   0   5   27.60   13.04   1
  13   0  -5    9.81   13.15   3
 -12   0   5   89.62   18.88   1
  12   0  -5   99.29   21.10   3
  11   0  -5 1028.92   85.35   3
 -11   0   5 1075.82   73.25   1
 -10   0   5  115.45   18.92   1
  10   0  -5  139.10   22.67   3
  -9   0   5  -18.26    9.25   1
   9   0  -5   -2.21    9.87   3
   8   0  -5  125.14   20.42   3
  -8   0   5  123.94   18.02   1
   7   0  -5  477.59   44.50   3
  -7   0   5  537.51   38.65   1
   6   0  -5  128.98   19.41   3
  -6   0   5  160.01   17.75   1
   5   0  -5   77.78   14.78   3
  -5   0   5   85.85   13.67   1
  -4   0   5 1505.09   99.67   1
   4   0  -5 1638.39  114.06   3
  -3   0   5   32.69    9.89   1
   3   0  -5   26.38    9.51   3
   2   0  -5  676.09   51.85   3
  -2   0   5  657.79   45.74   1
  -1   0   5  109.77   14.93   1
   1   0  -5  127.47   16.45   3
  -1   0   5  117.45   10.56   2
   0   0  -5 1948.89  124.15   2
   0   0   5 1998.29  117.48   1
   0   0  -5 1618.52  131.81   3
  -1   0  -5  334.89   26.28   2
   1   0   5  379.62   29.82   1
  -1   0  -5  343.91   30.98   3
  -2   0  -5  997.96   70.96   2
   2   0   5 1038.54   67.42   1
  -2   0  -5 1038.94   74.44   3
  -3   0  -5 1109.70   79.37   3
  -3   0  -5 1016.75   76.82   2
   3   0   5 1194.44   72.15   1
  -4   0  -5    9.64    6.41   3
   4   0   5   22.78    7.72   1
  -4   0  -5   18.30    7.48   2
   5   0   5  311.71   26.08   1
  -5   0  -5  328.58   28.30   3
  -5   0  -5  356.66   28.96   2
   6   0   5  397.01   29.64   4
   6   0   5  434.41   32.78   1
  -6   0  -5  454.38   35.60   3
  -6   0  -5  449.30   35.89   2
  -7   0  -5  706.67   54.54   3
  -7   0  -5  671.77   54.06   2
   7   0   5  743.27   50.13   1
   7   0   5  703.01   44.91   4
   8   0   5 1691.74  106.99   1
  -8   0  -5 1524.30  116.59   2
   8   0   5 1700.54   96.10   4
  -8   0  -5 1689.22  119.18   3
   9   0   5  -12.30   10.06   1
  -9   0  -5   -3.17    9.77   2
  -9   0  -5   -3.25    7.37   3
   9   0   5   -5.97    7.15   4
  10   0   5   91.79   15.17   4
 -10   0  -5   89.08   15.80   3
  10   0   5   89.41   17.20   1
 -10   0  -5   82.04   18.33   2
 -11   0  -5   43.13   15.87   2
 -11   0  -5   42.93   13.16   3
 -12   0  -5  308.99   31.07   3
 -12   0  -5  214.84   31.29   2
 -13   0  -5   -4.09   12.14   2
  14   0   5  104.36   27.89   2
  15   0   5  917.05   84.39   2
  15  -1  -5    5.90   13.10   3
 -15   1   5   -7.31   11.07   1
 -14   1   5  162.15   22.54   1
  14  -1  -5  135.45   24.38   3
 -13   1   5  609.70   45.62   1
  13  -1  -5  520.45   52.13   3
  12  -1  -5  164.99   25.75   3
 -12   1   5  161.74   22.60   1
  11  -1  -5   13.17   12.21   3
 -11   1   5    7.15   11.01   1
 -10   1   5    5.21    9.82   1
  10  -1  -5    1.91    9.81   3
   9  -1  -5  849.97   69.33   3
  -9   1   5  861.57   59.97   1
  -8   1   5   36.94   11.96   1
   8  -1  -5   40.44   13.65   3
   7  -1  -5  212.20   24.91   3
  -7   1   5  192.23   19.59   1
  -6   1   5 1277.76   84.35   1
  -6   1   5 1409.96   88.81   2
   6  -1  -5 1238.63   96.82   3
  -5   1   5  239.17   18.23   2
  -5   1   5  236.77   21.07   1
   5  -1  -5  252.74   25.41   3
   4  -1  -5  603.79   48.48   3
  -4   1   5  608.20   41.86   1
  -3   1   5  377.93   29.09   1
   3  -1  -5  414.56   34.67   3
   2  -1  -5 2292.05  162.07   3
  -2   1   5 2289.16  140.81   1
  -1   1   5  220.19   16.59   2
   1  -1  -5  197.11   22.33   3
  -1   1   5  212.07   17.94   1
   0  -1  -5   97.89   15.50   3
   0   1   5  104.05   10.82   2
   0   1   5  106.21   12.08   1
  -1  -1  -5  938.16   64.59   3
   1   1   5  783.53   55.80   1
   1   1   5  867.08   61.14   2
   2   1   5  383.36   28.74   1
  -2  -1  -5  371.34   31.06   3
   2   1   5  410.43   31.84   2
   3   1   5 2573.67  154.48   1
  -3  -1  -5 2359.10  169.84   2
  -3  -1  -5 2637.72  175.67   3
   4   1   5   -1.80    4.82   1
  -4  -1  -5   -0.81    5.48   2
  -4  -1  -5   -4.21    5.01   3
   5   1   5  982.64   63.25   4
  -5  -1  -5 1138.10   81.02   3
  -5  -1  -5 1127.54   79.12   2
   5   1   5 1207.61   71.33   1
  -6  -1  -5 1184.15   87.03   3
  -6  -1  -5 1130.97   84.97   2
   6   1   5 1306.01   69.24   4
   6   1   5 1159.99   76.52   1
   7   1   5   65.52   10.12   4
  -7  -1  -5   69.36   13.22   2
   7   1   5   64.98   12.10   1
  -7  -1  -5   87.58   13.51   3
  -8  -1  -5  469.89   39.70   3
  -8  -1  -5  457.18   39.43   2
   8   1   5  475.85   32.04   4
   8   1   5  464.43   35.40   1
   9   1   5   82.86   13.36   4
  -9  -1  -5  121.87   17.65   3
   9   1   5  105.38   16.15   1
  -9  -1  -5  102.90   18.40   2
  10   1   5  335.76   29.12   4
 -10  -1  -5  452.27   38.85   2
  10   1   5  393.77   33.02   1
 -10  -1  -5  423.01   37.49   3
  11   1   5   89.52   24.30   2
 -11  -1  -5   86.99   17.25   3
 -12  -1  -5  170.28   24.76   3
  12   1   5  165.11   30.47   2
  13   1   5  244.35   37.59   2
 -13  -1  -5  211.38   28.87   3
  14   1   5  217.03   36.03   2
 -14  -1  -5  208.46   29.10   3
  15   1   5   49.56   22.77   2
 -15   2   5   35.36   13.55   1
 -14   2   5  561.76   45.65   1
  13  -2  -5   41.82   14.66   3
 -13   2   5   41.79   13.68   1
  12  -2  -5  161.25   25.44   3
 -12   2   5  159.15   21.94   1
  11  -2  -5 1134.35   87.44   3
 -11   2   5 1045.54   74.41   1
  10  -2  -5   59.42   14.34   3
 -10   2   5   38.04   12.66   1
   9  -2  -5   16.69   10.30   3
  -9   2   5   22.27   10.38   1
   8  -2  -5   15.35   10.42   3
  -8   2   5    1.03    8.64   1
  -7   2   5  970.20   65.02   2
  -7   2   5  866.63   61.65   1
   7  -2  -5  931.41   71.95   3
   6  -2  -5  468.91   39.59   3
  -6   2   5  424.75   33.12   1
  -6   2   5  445.05   32.87   2
  -5   2   5  185.49   17.86   1
   5  -2  -5  190.08   21.93   3
  -5   2   5  191.64   15.81   2
  -4   2   5 2008.95  128.89   1
  -4   2   5 2050.77  139.52   2
   4  -2  -5 2185.92  148.75   3
   3  -2  -5  194.06   20.83   3
  -3   2   5  147.21   15.43   1
  -3   2   5  176.27   14.36   2
   2  -2  -5   59.47   12.97   3
  -2   2   5   61.84    8.54   1
  -2   2   5   48.81    7.18   2
  -1   2   5  719.04   48.22   1
  -1   2   5  793.17   52.91   2
   1  -2  -5  752.09   58.54   3
   0  -2  -5 8624.45  580.76   3
   0   2   5 8402.64  561.50   2
   0   2   5 8411.41  507.56   1
   1   2   5 1580.08   91.96   1
  -1  -2  -5 1459.39  106.85   3
   1   2   5 1480.13  103.37   2
  -2  -2  -5    3.27    4.99   3
   2   2   5    5.41    3.97   1
   2   2   5    1.88    5.56   2
   3   2   5 1044.07   74.43   2
  -3  -2  -5 1019.14   74.53   3
   4   2   5   84.51   14.22   2
  -4  -2  -5   88.62   12.59   3
   5   2   5  380.92   25.44   4
   5   2   5  369.56   27.92   1
  -5  -2  -5  405.08   33.86   3
   5   2   5  476.90   37.41   2
   6   2   5   12.64    6.18   1
  -6  -2  -5   11.38    7.81   3
   6   2   5    7.39   10.74   2
   6   2   5    9.33    5.19   4
   7   2   5 1842.76  106.21   4
   7   2   5 1920.04  136.99   2
  -7  -2  -5 2101.92  137.19   3
   7   2   5 1763.93  118.17   1
  -8  -2  -5 1862.27  131.27   3
   8   2   5 1809.40  114.04   1
   8   2   5 1817.22  102.47   4
   8   2   5 1770.43  131.99   2
   9   2   5  166.46   17.92   1
  -9  -2  -5  147.40   20.20   3
   9   2   5  139.22   24.87   2
   9   2   5  126.07   14.67   4
 -10  -2  -5  215.72   25.35   3
  10   2   5  201.93   31.10   2
  11   2   5   87.25   21.98   2
 -11  -2  -5   65.46   16.57   3
  12   2   5  430.09   44.59   2
 -12  -2  -5  378.46   39.37   3
 -13  -2  -5   17.84   11.89   3
  13   2   5    7.85   17.01   2
  14   2   5  252.48   37.21   2
 -14  -2  -5  235.04   31.72   3
 -15  -2  -5  568.35   53.91   3
 -15   3   5   29.03   14.62   1
 -14   3   5  251.25   29.29   1
 -13   3   5  176.82   24.20   1
 -12   3   5  264.12   26.73   1
  12  -3  -5  279.87   30.86   3
 -11   3   5   38.94   12.75   1
  11  -3  -5   16.99   10.50   3
 -10   3   5   29.85   11.67   1
  10  -3  -5   24.22   11.21   3
   9  -3  -5 1067.89   88.61   3
  -9   3   5 1247.31   78.06   1
   8  -3  -5   45.14   14.05   3
  -8   3   5   61.67   12.94   1
  -8   3   5   66.34    9.93   2
   7  -3  -5   25.91   11.22   3
  -7   3   5   24.93    7.18   2
  -7   3   5   36.13   10.24   1
  -6   3   5  382.33   30.21   1
   6  -3  -5  414.63   36.03   3
  -5   3   5 1392.06   85.61   1
   5  -3  -5 1381.75   98.88   3
  -5   3   5 1234.12   91.78   2
   4  -3  -5  263.73   25.57   3
  -4   3   5  223.04   20.27   2
  -4   3   5  243.19   20.62   1
  -3   3   5  102.21   11.64   2
  -3   3   5  119.86   12.81   1
   3  -3  -5  110.34   17.46   3
   2  -3  -5 1750.85  129.79   3
  -2   3   5 1853.14  111.63   1
  -2   3   5 1829.72  122.94   2
  -1   3   5  601.90   38.99   1
   1  -3  -5  654.26   47.77   3
  -1   3   5  542.15   43.32   2
   0   3   5   40.80    6.28   1
   0  -3  -5   55.22   10.23   3
   0   3   5   50.93    8.52   2
   1   3   5  137.00   14.99   2
  -1  -3  -5  162.84   15.86   3
   1   3   5  113.10   10.33   1
  -2  -3  -5 1306.72   92.02   3
   2   3   5 1271.25   90.29   2
   3   3   5  231.39   22.10   2
  -3  -3  -5  223.41   21.15   3
  -4  -3  -5   66.71   11.13   3
   4   3   5   69.90   13.38   2
  -5  -3  -5  966.32   73.07   3
   5   3   5 1004.65   73.97   2
   6   3   5  106.40   18.60   2
  -6  -3  -5  130.30   16.60   3
  -7  -3  -5  300.74   19.49   1
  -7  -3  -5  269.45   27.29   3
   7   3   5  291.54   30.72   2
   8   3   5  113.10   21.67   2
  -8  -3  -5  119.66   17.65   3
   9   3   5  481.16   46.53   2
  -9  -3  -5  516.17   44.04   3
  10   3   5  885.04   74.86   2
 -10  -3  -5  935.37   72.36   3
  11   3   5    7.78   14.40   2
 -11  -3  -5    7.54   10.09   3
  12   3   5  504.55   51.00   2
 -12  -3  -5  519.14   47.73   3
  13   3   5  136.47   26.41   2
 -13  -3  -5  103.57   21.87   3
  14   3   5  204.17   32.86   2
 -14  -3  -5  189.83   28.67   3
 -15  -3  -5   21.76   14.45   3
 -16  -3  -5   21.19   13.64   3
 -15   4   5   42.87   15.03   1
 -14   4   5  248.25   28.86   1
 -13   4   5  -11.02   10.46   1
 -12   4   5   87.88   17.41   1
 -11   4   5  650.32   48.97   1
  10  -4  -5  298.66   31.44   3
 -10   4   5  314.16   28.54   1
  -9   4   5   36.06   12.07   1
   9  -4  -5   46.30   14.39   3
  -8   4   5    2.19    8.18   1
   8  -4  -5   -2.95   10.51   3
  -8   4   5    7.11    6.80   2
  -7   4   5 1879.09  130.96   2
  -7   4   5 1913.95  120.11   1
   7  -4  -5 1895.78  137.83   3
  -6   4   5  108.19   14.18   2
  -6   4   5  121.93   15.16   1
   6  -4  -5  130.03   18.92   3
   5  -4  -5   47.46   13.03   3
  -5   4   5   48.98    9.90   1
  -5   4   5   53.79    9.64   2
  -4   4   5 1037.99   66.96   2
   4  -4  -5  947.41   71.75   3
  -4   4   5  816.03   60.26   1
  -3   4   5   11.33    6.17   1
   3  -4  -5   12.71   10.05   3
  -3   4   5   17.20    6.94   2
   2  -4  -5  255.26   23.33   3
  -2   4   5  175.65   16.80   1
  -2   4   5  230.87   20.19   2
  -1   4   5  184.77   17.91   2
  -1   4   5  167.58   14.53   1
   1  -4  -5  205.73   19.48   3
   0   4   5 6435.71  376.42   1
   0   4   5 5875.29  418.08   2
   0  -4  -5 6534.31  430.69   3
  -1  -4  -5  522.53   39.42   3
   1   4   5  516.04   39.28   2
   1   4   5  485.54   31.95   1
  -2  -4  -5   66.80   10.60   3
   2   4   5   63.92   11.61   2
  -3  -4  -5 1333.14   97.56   3
   3   4   5 1391.29   96.63   2
   4   4   5   38.75   11.61   2
  -4  -4  -5   55.70   11.00   3
   5   4   5  636.22   50.75   2
  -5  -4  -5  642.33   50.14   3
  -6  -4  -5  133.93   17.07   3
   6   4   5  106.77   18.07   2
  -7  -4  -5 1265.26   90.71   3
   7   4   5 1156.54   90.38   2
   8   4   5  391.97   37.48   2
  -8  -4  -5  354.18   34.56   3
  -9  -4  -5  179.80   22.66   3
   9   4   5  136.69   24.28   2
  10   4   5  470.30   43.50   2
 -10  -4  -5  390.29   39.67   3
 -11  -4  -5  106.98   19.99   3
  11   4   5   96.63   21.96   2
  12   4   5  549.28   52.07   2
 -12  -4  -5  520.78   49.48   3
  13   4   5   66.67   19.35   2
 -13  -4  -5   58.54   17.24   3
 -14  -4  -5  166.50   26.57   3
 -15  -4  -5  266.19   35.17   3
 -16  -4  -5   54.74   18.04   3
 -14   5   5   53.70   16.03   1
 -13   5   5  109.69   20.82   1
 -12   5   5  281.41   28.06   1
 -11   5   5    6.75   10.36   1
 -10   5   5  152.68   20.44   1
   9  -5  -5 1302.06  103.54   3
  -9   5   5 1464.78   91.12   1
  -9   5   5 1346.19   98.85   2
   8  -5  -5   92.92   18.08   3
  -8   5   5   69.97   14.66   1
  -8   5   5   72.00   13.95   2
  -7   5   5   18.82    8.56   1
   7  -5  -5   19.65   11.10   3
  -7   5   5   26.25    9.97   2
  -6   5   5   46.63   10.66   2
   6  -5  -5   68.15   14.12   3
  -6   5   5   52.05   11.14   1
  -5   5   5 1454.70   91.30   2
   5  -5  -5 1199.96   94.62   3
  -5   5   5 1176.90   81.65   1
   4  -5  -5  101.11   16.21   3
  -4   5   5   99.70   13.87   2
  -4   5   5  116.55   13.10   1
  -3   5   5  619.56   43.24   1
  -3   5   5  638.27   48.30   2
   3  -5  -5  675.39   50.91   3
  -2   5   5 2345.68  140.37   1
  -2   5   5 2234.84  156.24   2
  -1   5   5   33.30    9.48   2
  -1   5   5   26.99    6.04   1
   1  -5  -5   25.65    8.27   3
   0  -5  -5   17.03    5.82   4
   0  -5  -5   24.79    7.54   3
   0   5   5   24.42    8.74   2
   0  -5  -5   16.75    6.34   1
  -1  -5  -5   74.23   10.85   3
  -1  -5  -5   53.69    8.59   1
  -1  -5  -5   63.39    7.75   4
   1   5   5   74.48   12.41   2
  -2  -5  -5  863.80   58.88   1
   2   5   5  983.13   68.74   2
  -2  -5  -5  954.87   68.81   3
   3   5   5  452.10   36.99   2
  -3  -5  -5  424.49   35.71   3
   4   5   5    8.93    9.08   2
  -4  -5  -5    8.59    8.10   3
   5   5   5 1662.60  116.06   2
  -5  -5  -5 1584.50  116.95   3
   6   5   5   10.34    9.26   2
  -6  -5  -5   23.94    9.62   3
  -7  -5  -5  555.82   48.50   3
   7   5   5  624.24   50.45   2
   8   5   5  120.11   21.61   2
  -8  -5  -5  137.75   20.04   3
  -9  -5  -5  288.08   30.02   3
   9   5   5  272.78   32.43   2
 -10  -5  -5  740.85   63.06   3
  10   5   5  789.89   64.82   2
  11   5   5   71.00   18.03   2
 -11  -5  -5   84.38   18.24   3
 -12  -5  -5  240.48   31.16   3
  12   5   5  232.13   32.61   2
 -13  -5  -5   46.06   16.13   3
  13   5   5   18.71   14.38   2
 -14  -5  -5  474.63   47.61   3
 -15  -5  -5    6.78   11.59   3
 -14   6   5  281.87   31.60   1
 -13   6   5   19.94   12.13   1
 -12   6   5  179.16   24.25   1
 -11   6   5  230.83   26.64   1
 -10   6   5  300.98   28.59   1
  -9   6   5   48.78   14.00   1
  -9   6   5   32.42   13.73   2
  -8   6   5   16.39   10.62   2
  -8   6   5    3.43    9.85   1
  -7   6   5 2122.78  142.19   2
  -7   6   5 2155.81  128.49   1
   7  -6  -5 1785.07  145.54   3
  -6   6   5    7.60    7.46   1
  -6   6   5    4.16    8.45   2
   6  -6  -5   16.12   10.25   3
  -5   6   5   64.38   11.94   1
   5  -6  -5   63.92   13.27   3
  -5   6   5   75.67   13.85   2
  -4   6   5  793.96   57.26   2
   4  -6  -5  812.28   58.31   3
  -4   6   5  667.58   50.32   1
   3  -6  -5  270.48   23.82   3
  -3   6   5  250.58   24.07   2
  -3   6   5  257.00   21.10   1
   2  -6  -5 1448.00   81.83   4
   2  -6  -5 1403.80  100.33   3
  -2   6   5 1383.29   99.28   2
   2  -6  -5 1402.26   90.71   1
   1  -6  -5   99.00   12.60   3
  -1   6   5   90.57   14.39   2
   1  -6  -5   92.47   11.63   4
   1  -6  -5   99.51   12.99   1
   0   6   5 1487.29  100.15   2
   0  -6  -5 1447.99  100.40   3
   0  -6  -5 1335.37   89.11   1
   0  -6  -5 1368.39   80.08   4
  -1  -6  -5  213.39   17.49   4
   1   6   5  277.11   24.23   2
  -1  -6  -5  230.25   19.44   1
  -1  -6  -5  244.93   22.40   3
  -2  -6  -5   94.71   11.07   1
  -2  -6  -5   77.36   12.51   3
   2   6   5   89.38   14.84   2
  -3  -6  -5 1292.07   82.10   1
  -3  -6  -5 1246.94   93.48   3
   3   6   5 1337.41   93.36   2
   4   6   5 1440.70  105.99   2
  -4  -6  -5 1522.77  107.37   3
   5   6   5  541.44   45.51   2
  -5  -6  -5  545.08   44.98   3
  -6  -6  -5   38.44   11.14   3
   6   6   5   21.58   11.83   2
  -7  -6  -5  344.61   32.42   3
   7   6   5  328.44   33.68   2
  -8  -6  -5  295.88   31.29   3
   8   6   5  332.44   33.32   2
  -9  -6  -5  174.31   23.93   3
   9   6   5  183.03   26.33   2
  10   6   5   48.32   16.12   2
 -10  -6  -5   53.67   15.88   3
  11   6   5  361.55   39.56   2
 -11  -6  -5  424.39   40.29   3
 -12  -6  -5  726.42   63.26   3
  12   6   5  716.35   63.42   2
  13   6   5   11.43   14.33   2
 -13  -6  -5   34.66   16.02   3
 -14  -6  -5  252.75   34.34   3
 -15  -6  -5   46.51   16.28   3
  14  -7  -5   98.90   17.46   4
  14  -7  -5   99.23   22.26   1
  13  -7  -5    7.34   13.36   1
  13  -7  -5    3.66    9.16   4
  12  -7  -5  313.64   37.94   1
  12  -7  -5  349.40   31.32   4
 -11   7   5  183.94   23.90   1
 -10   7   5  145.67   24.55   2
 -10   7   5  221.89   24.41   1
  -9   7   5  667.41   57.35   2
  -9   7   5  713.96   51.05   1
  -8   7   5   93.95   17.66   2
  -8   7   5   64.06   14.88   1
  -7   7   5  210.88   25.39   2
  -7   7   5  236.16   22.67   1
  -6   7   5   88.58   14.32   1
  -6   7   5   80.10   15.47   2
   5  -7  -5 1767.09  102.17   4
   5  -7  -5 1717.25  122.97   3
  -5   7   5 1791.16  122.21   2
   5  -7  -5 1616.98  112.47   1
  -4   7   5   13.96    8.71   2
   4  -7  -5   12.49    8.00   4
   4  -7  -5   15.73    9.01   1
   4  -7  -5   16.21    7.42   3
   3  -7  -5  296.56   26.48   1
   3  -7  -5  282.36   25.05   3
   3  -7  -5  306.24   24.50   4
  -3   7   5  295.84   27.41   2
   2  -7  -5 1010.36   59.01   4
   2  -7  -5  952.77   64.96   1
  -2   7   5  984.29   71.02   2
   2  -7  -5  906.88   69.62   3
   1  -7  -5  291.66   23.38   4
   1  -7  -5  284.44   25.64   1
   1  -7  -5  289.44   25.89   3
  -1   7   5  363.75   29.07   2
   0   7   5  241.32   22.86   2
   0  -7  -5  216.19   18.39   4
   0  -7  -5  193.64   20.17   3
   0  -7  -5  213.97   19.81   1
   1   7   5   85.19   14.43   2
  -1  -7  -5   70.35   11.25   1
  -1  -7  -5   69.45   12.03   3
   2   7   5 2244.93  148.14   2
  -2  -7  -5 1998.41  132.27   1
  -2  -7  -5 2106.44  149.36   3
  -3  -7  -5  789.09   60.95   3
   3   7   5  809.16   61.55   2
   4   7   5   28.43   11.69   2
  -4  -7  -5   28.98   10.37   3
  -4  -7  -5   39.31    9.82   1
  -5  -7  -5  965.06   72.35   3
   5   7   5  919.86   71.97   2
  -6  -7  -5   78.51   15.87   3
   6   7   5  108.30   18.94   2
  -7  -7  -5  311.41   30.63   3
   7   7   5  272.56   30.69   2
  -8  -7  -5   25.84   11.11   3
   8   7   5   27.54   13.74   2
   9   7   5  375.07   39.85   2
  -9  -7  -5  456.20   40.10   3
 -10  -7  -5  679.17   57.67   3
  10   7   5  657.73   58.46   2
  11   7   5    2.35   13.20   2
 -11  -7  -5   14.90   12.52   3
 -12  -7  -5   97.56   21.43   3
 -13  -7  -5   -8.42   10.84   3
 -14  -7  -5  331.00   39.99   3
  13  -8  -5   11.38   13.81   1
  13  -8  -5   35.09   13.04   4
  12  -8  -5  127.98   20.25   4
  12  -8  -5  138.70   24.68   1
  11  -8  -5   22.41   10.70   4
  11  -8  -5   -6.20   12.09   1
  10  -8  -5  342.23   33.97   4
  10  -8  -5  342.44   35.16   1
 -10   8   5  367.75   38.01   2
  -9   8   5   61.73   18.17   2
   9  -8  -5   95.72   20.60   1
   9  -8  -5  100.47   18.59   4
  -8   8   5  407.84   39.28   2
   8  -8  -5  435.85   38.97   1
   8  -8  -5  399.31   35.02   4
  -7   8   5 1098.55   80.43   2
   7  -8  -5 1036.49   68.61   4
   7  -8  -5 1022.80   75.52   1
   6  -8  -5   -2.87    8.78   4
  -6   8   5   10.92   10.47   2
   6  -8  -5   -8.72    9.75   1
   5  -8  -5   16.73   10.66   4
  -5   8   5    4.15   10.28   2
   5  -8  -5   17.99   11.25   1
   4  -8  -5  360.67   32.29   1
   4  -8  -5  380.47   30.08   4
  -4   8   5  361.87   33.26   2
   3  -8  -5 1176.95   87.16   3
   3  -8  -5 1246.46   74.67   4
  -3   8   5 1266.72   89.22   2
   3  -8  -5 1198.49   82.64   1
   2  -8  -5  155.56   19.66   1
   2  -8  -5  148.46   17.43   4
   2  -8  -5  141.35   15.75   3
  -2   8   5  153.34   19.48   2
   1  -8  -5   50.44   11.07   4
  -1   8   5   33.85   10.70   2
   1  -8  -5   32.14    9.93   1
   1  -8  -5   25.47    8.20   3
   0  -8  -5  730.11   51.93   1
   0   8   5  792.74   57.82   2
   0  -8  -5  686.21   55.19   3
  -1  -8  -5    8.11    7.66   3
  -1  -8  -5    8.22    8.07   1
   1   8   5    2.98    8.04   2
  -2  -8  -5   17.87    9.03   1
   2   8   5   25.59   10.72   2
  -2  -8  -5   40.34   10.34   3
  -3  -8  -5    7.14    8.10   3
  -3  -8  -5   12.46    8.34   1
   3   8   5    1.50    8.99   2
   4   8   5 1593.67  117.16   2
  -4  -8  -5 1662.07  118.31   3
  -5  -8  -5  396.26   39.29   3
   5   8   5  514.84   42.06   2
   6   8   5  111.86   20.24   2
  -6  -8  -5  128.69   19.34   3
   7   8   5 1022.90   77.90   2
  -7  -8  -5  960.02   77.10   3
   8   8   5   49.26   15.28   2
  -8  -8  -5   33.85   12.79   3
   9   8   5  423.07   40.94   2
  -9  -8  -5  402.33   39.27   3
 -10  -8  -5   48.23   15.22   3
  10   8   5   50.48   17.01   2
  11   8   5  289.32   35.89   2
 -11  -8  -5  272.04   31.19   3
 -12  -8  -5  458.88   45.59   3
  12   8   5  427.74   44.52   2
 -13  -8  -5   14.11   13.79   3
 -14  -8  -5  279.37   36.82   3
  13  -9  -5   41.09   11.58   4
  13  -9  -5   21.18   15.52   1
  12  -9  -5  689.69   58.50   1
  12  -9  -5  674.70   51.75   4
  11  -9  -5    5.23    8.39   4
  11  -9  -5   -2.96   11.63   1
  10  -9  -5  144.89   26.22   1
  10  -9  -5  106.87   21.42   4
 -10   9   5   78.64   21.15   2
  -9   9   5  306.18   33.35   2
   9  -9  -5  263.25   30.50   4
   9  -9  -5  294.58   35.13   1
   8  -9  -5   -3.58   10.03   4
  -8   9   5   42.78   15.26   2
   8  -9  -5   37.05   15.17   1
   7  -9  -5    3.96   11.01   1
   7  -9  -5    5.70   10.94   4
  -7   9   5   -3.89   11.11   2
   6  -9  -5   13.81   11.21   4
   6  -9  -5  -13.18   10.07   1
  -6   9   5   -3.17   10.06   2
   5  -9  -5 1631.12  112.89   1
  -5   9   5 1691.68  121.40   2
   5  -9  -5 1732.11  102.09   4
   4  -9  -5   57.91   17.04   1
  -4   9   5   75.15   16.40   2
   4  -9  -5   77.13   15.42   4
  -3   9   5   31.80   12.22   2
   3  -9  -5   42.23   11.96   4
   3  -9  -5   48.10   13.58   1
   2  -9  -5  930.20   65.28   1
  -2   9   5  912.87   69.86   2
   2  -9  -5  924.55   59.11   4
  -1   9   5  251.34   25.60   2
   1  -9  -5  220.35   21.63   4
   1  -9  -5  218.74   24.25   1
   1  -9  -5  194.86   20.85   3
   0  -9  -5  126.70   18.82   1
   0  -9  -5  117.55   16.09   3
   0   9   5  164.84   21.02   2
  -1  -9  -5    8.41    8.02   1
  -1  -9  -5    1.98    7.23   3
   1   9   5    4.11    8.80   2
   2   9   5  986.62   71.68   2
  -2  -9  -5  900.09   64.99   1
  -2  -9  -5  889.72   69.57   3
  -3  -9  -5  688.04   51.79   3
  -3  -9  -5  600.75   47.80   1
   3   9   5  622.46   52.72   2
  -4  -9  -5   55.50   13.83   3
   4   9   5   58.33   15.61   2
   5   9   5  435.96   40.35   2
  -5  -9  -5  405.54   37.70   3
   6   9   5  307.17   32.15   2
  -6  -9  -5  272.50   29.28   3
   7   9   5  111.15   20.86   2
  -7  -9  -5  116.37   19.14   3
  -8  -9  -5   46.56   13.36   3
   8   9   5   59.32   16.09   2
  -9  -9  -5  716.53   59.65   3
   9   9   5  682.94   60.49   2
 -10  -9  -5  221.53   28.40   3
  10   9   5  182.90   28.62   2
  11   9   5   33.24   15.89   2
 -11  -9  -5   43.88   14.93   3
 -12  -9  -5   33.64   12.81   3
 -13  -9  -5   13.78   11.62   3
  12 -10  -5  131.03   28.17   1
  12 -10  -5   99.23   19.05   4
  11 -10  -5   14.42   13.10   4
  11 -10  -5   10.73   19.10   1
 -11  10   5   17.05   16.46   2
 -10  10   5  289.02   36.40   2
  10 -10  -5  308.20   40.23   1
  10 -10  -5  288.64   34.07   4
  -9  10   5   42.34   16.75   2
   9 -10  -5   11.68   16.11   1
   9 -10  -5    7.05   10.81   4
   8 -10  -5  342.31   34.27   4
   8 -10  -5  270.75   36.49   1
  -8  10   5  326.14   34.70   2
   7 -10  -5  618.98   46.89   4
   7 -10  -5  606.69   52.21   1
  -7  10   5  587.25   52.77   2
  -6  10   5   87.78   18.97   2
   6 -10  -5   87.08   18.79   4
   6 -10  -5   89.46   21.86   1
  -5  10   5  103.68   20.37   2
   5 -10  -5  129.04   21.16   4
   5 -10  -5  139.25   23.11   1
   4 -10  -5   11.02   11.46   1
   4 -10  -5   19.13   12.25   4
  -4  10   5   -0.79   10.34   2
   3 -10  -5  842.65   62.41   1
  -3  10   5  855.09   65.82   2
   3 -10  -5  820.18   56.55   4
   2 -10  -5   13.49   10.38   4
   2 -10  -5   25.46   12.17   1
  -2  10   5   -4.22   10.23   2
  -1  10   5   77.39   16.95   2
   1 -10  -5   79.07   17.41   1
   0  10   5 1365.76   91.64   2
   0 -10  -5 1122.11   83.22   1
   0 -10  -5 1166.99   88.55   3
  -1 -10  -5   18.79   11.06   1
   1  10   5   11.35    9.71   2
  -1 -10  -5   13.14    8.55   3
  -2 -10  -5  174.77   24.41   1
   2  10   5  196.55   24.94   2
  -2 -10  -5  180.44   21.10   3
  -3 -10  -5   43.64   12.43   3
   3  10   5   21.29   13.08   2
   4  10   5  429.55   42.02   2
  -4 -10  -5  493.17   41.05   3
   5  10   5  155.43   24.43   2
  -5 -10  -5  136.29   19.90   3
  -6 -10  -5   45.04   12.18   3
   6  10   5   22.38   13.42   2
   7  10   5  361.73   37.43   2
  -7 -10  -5  340.00   34.42   3
   8  10   5   39.29   15.58   2
  -8 -10  -5   48.82   14.41   3
  -9 -10  -5  549.82   48.90   3
   9  10   5  521.17   49.44   2
 -10 -10  -5   17.54   10.91   3
  10  10   5   23.07   15.48   2
 -11 -10  -5  329.83   35.06   3
  11  10   5  275.51   37.08   2
 -12 -10  -5  208.46   30.50   3
 -11  11   5   51.25   22.64   2
  11 -11  -5   67.32   20.69   4
  11 -11  -5   33.74   21.71   1
  10 -11  -5  141.10   25.43   4
 -10  11   5  107.50   24.98   2
  10 -11  -5  152.03   30.38   1
   9 -11  -5  208.71   28.29   4
   9 -11  -5  207.47   33.19   1
  -9  11   5  187.43   29.40   2
   8 -11  -5  389.87   39.46   4
  -8  11   5  378.75   40.59   2
   8 -11  -5  430.23   44.72   1
  -7  11   5   25.92   14.08   2
   7 -11  -5   52.76   19.35   1
   7 -11  -5   34.30   15.71   4
  -6  11   5   63.07   17.72   2
   6 -11  -5   95.70   22.94   1
   6 -11  -5   58.07   17.57   4
  -5  11   5  563.06   51.20   2
   5 -11  -5  624.98   47.32   4
   5 -11  -5  611.25   51.00   1
   4 -11  -5   13.55   12.48   4
   4 -11  -5   44.29   15.93   1
  -4  11   5   37.25   14.30   2
   3 -11  -5   21.48   12.94   1
   3 -11  -5   18.11   12.08   4
  -3  11   5   13.21   12.07   2
  -2  11   5  189.42   24.71   2
   2 -11  -5  170.09   25.13   1
  -1  11   5  817.59   63.96   2
   1 -11  -5  781.53   60.62   1
   0 -11  -5  195.46   26.76   1
   0  11   5  208.69   25.76   2
   1  11   5  115.28   19.87   2
  -1 -11  -5   72.32   17.80   1
   2  11   5 1099.66   81.09   2
  -2 -11  -5  991.80   78.38   3
  -3 -11  -5   75.23   14.75   3
   3  11   5   87.33   19.03   2
  -4 -11  -5    8.03    7.41   3
   4  11   5   -9.77   10.36   2
   5  11   5  183.30   27.73   2
  -5 -11  -5  200.77   22.92   3
   6  11   5  478.67   43.91   2
  -6 -11  -5  416.01   40.24   3
  -7 -11  -5  242.99   28.96   3
   7  11   5  305.24   35.38   2
  -8 -11  -5   15.20   11.19   3
   8  11   5   10.68   14.22   2
  -9 -11  -5  715.67   60.25   3
   9  11   5  668.74   60.94   2
 -10 -11  -5   37.69   13.44   3
  10  11   5    6.50   15.59   2
 -11 -11  -5   83.40   18.68   3
 -12 -11  -5   32.43   13.50   3
 -11  12   5    6.39   16.99   2
 -10  12   5  272.94   39.35   2
  10 -12  -5  347.47   44.10   1
  10 -12  -5  363.54   39.97   4
   9 -12  -5   15.57   18.69   1
  -9  12   5   42.87   17.25   2
   9 -12  -5   54.76   19.39   4
  -8  12   5  207.70   30.76   2
   8 -12  -5  256.87   36.07   1
   8 -12  -5  238.28   32.52   4
   7 -12  -5  196.79   31.14   1
  -7  12   5  169.94   27.21   2
   7 -12  -5  193.41   29.05   4
  -6  12   5   57.46   17.00   2
   6 -12  -5   64.81   18.87   4
   6 -12  -5   73.81   20.28   1
   5 -12  -5   20.97   13.47   4
   5 -12  -5    7.09   12.00   1
  -5  12   5   20.80   12.83   2
  -4  12   5   16.35   11.74   2
   4 -12  -5  -10.24   10.53   1
   3 -12  -5  559.55   47.99   1
  -3  12   5  535.15   47.93   2
  -2  12   5   29.58   13.73   2
   2 -12  -5   17.25   14.89   1
   1 -12  -5   93.76   20.73   1
  -1  12   5   92.42   19.27   2
   0 -12  -5  427.65   40.25   1
   0  12   5  466.70   41.67   2
   1  12   5  280.24   30.33   2
   2  12   5   95.37   19.39   2
   3  12   5    2.67   11.53   2
  -4 -12  -5  348.96   32.12   3
   4  12   5  317.53   34.72   2
   5  12   5  224.94   30.25   2
  -5 -12  -5  234.63   25.49   3
   6  12   5   31.28   13.98   2
  -6 -12  -5   14.87   10.16   3
   7  12   5  101.60   22.16   2
  -7 -12  -5  116.53   20.28   3
  -8 -12  -5  120.92   21.15   3
   8  12   5   81.03   20.24   2
   9  12   5   81.46   20.43   2
  -9 -12  -5   94.15   19.62   3
 -10 -12  -5   28.33   11.10   3
 -11 -12  -5  299.83   33.82   3
 -10  13   5  130.41   27.20   2
  -9  13   5    5.83   15.62   2
   9 -13  -5    0.53   14.36   4
   9 -13  -5   14.86   16.25   1
   8 -13  -5  502.02   50.25   1
   8 -13  -5  549.23   47.83   4
  -8  13   5  508.86   49.88   2
   7 -13  -5   30.03   16.39   4
   7 -13  -5   24.08   17.38   1
  -7  13   5   12.20   14.69   2
  -6  13   5   51.01   16.64   2
   6 -13  -5   61.78   20.30   1
  -5  13   5  503.37   47.49   2
   5 -13  -5  516.97   47.83   1
  -4  13   5   31.60   13.89   2
   4 -13  -5    4.33   12.57   1
   3 -13  -5    1.63   12.25   1
  -3  13   5   -6.46   10.51   2
  -2  13   5   14.12   11.44   2
   2 -13  -5   -0.67   13.28   1
  -1  13   5  539.86   49.39   2
   1 -13  -5  591.86   50.09   1
   0  13   5   71.89   16.75   2
   1  13   5   45.71   14.88   2
   2  13   5  448.43   42.31   2
   3  13   5   47.45   15.90   2
   4  13   5   32.15   13.74   2
   5  13   5   -3.80   11.71   2
  -6 -13  -5  563.94   50.78   3
   6  13   5  595.84   53.21   2
   7  13   5  390.82   41.78   2
  -7 -13  -5  472.49   42.21   3
   8  13   5    4.74   13.92   2
  -8 -13  -5    5.99   10.18   3
  -9 -13  -5  279.10   30.28   3
   9  13   5  226.34   31.89   2
 -10 -13  -5    5.28   10.44   3
   8 -14  -5  118.46   26.34   1
  -8  14   5   92.49   22.41   2
   7 -14  -5   97.30   24.71   1
  -7  14   5  125.35   24.97   2
  -6  14   5  121.10   23.37   2
   6 -14  -5  153.23   28.64   1
  -5  14   5    6.06   12.25   2
   5 -14  -5   27.85   15.83   1
  -4  14   5    9.22   13.95   2
   4 -14  -5   41.26   18.72   1
  -3  14   5  368.56   38.55   2
   3 -14  -5  407.24   40.60   1
   2 -14  -5   -3.92   11.84   1
  -2  14   5   36.33   13.06   2
  -1  14   5   13.12   10.80   2
   0  14   5  207.37   28.16   2
   1  14   5  296.39   32.14   2
   2  14   5    4.31   11.35   2
   3  14   5   20.13   11.96   2
   4  14   5  529.64   48.60   2
   5  14   5   28.64   14.15   2
   6  14   5    2.99   12.43   2
   7  14   5   40.27   16.57   2
  -8 -14  -5   55.37   15.17   3
   8  14   5   63.31   17.28   2
  -9 -14  -5   98.29   19.38   3
   7 -15  -5   49.35   18.85   1
  -6  15   5  188.26   28.94   2
   6 -15  -5  194.52   34.17   1
   5 -15  -5  289.36   40.01   1
  -5  15   5  327.35   35.47   2
   4 -15  -5   65.02   22.18   1
  -4  15   5  106.40   21.32   2
  -3  15   5   -3.71   11.93   2
   3 -15  -5    5.87   14.88   1
  -2  15   5   16.04   10.60   2
  -1  15   5  407.36   40.25   2
   0  15   5   21.51   11.58   2
   1  15   5   11.31   11.14   2
   2  15   5  216.55   29.33   2
   3  15   5  164.15   24.69   2
   4  15   5   72.34   17.57   2
   5  15   5   10.70   13.66   2
   6  15   5  425.42   42.24   2
   7  15   5   48.78   16.64   2
   5 -16  -5   10.18   15.86   1
   4 -16  -5   39.84   15.66   1
  -2  16   5   12.71   11.86   2
  -1  16   5   12.85   11.33   2
   0  16   5   32.87   15.13   2
   1  16   5  118.94   21.76   2
   2  16   5   60.18   17.14   2
   3  16   5   44.57   16.83   2
   4  16   5  440.56   43.11   2
  -3  14  -6   60.12   14.82   2
  -4 -13   6    0.26   24.27   1
  -3 -13   6   63.03   28.20   1
  -2 -13   6   63.09   26.25   1
  -1 -13   6   44.24   26.62   1
   0 -13   6   21.19   21.05   1
   1 -13   6  109.43   26.74   1
  -2  13  -6   20.61   12.79   2
   2 -13   6   48.85   22.42   1
  -3  13  -6   46.33   14.83   2
   3 -13   6   70.89   22.83   1
  -4  13  -6   64.31   16.35   2
   4 -13   6   15.82   19.79   1
  -5  13  -6   91.88   18.83   2
  -6 -12   6   64.22   29.09   1
  -5 -12   6    6.24   24.89   1
  -4 -12   6  109.08   32.74   1
  -3 -12   6   29.22   24.70   1
  -2 -12   6   43.90   26.63   1
  -1 -12   6  221.07   38.81   1
   0 -12   6   14.57   21.22   1
   1 -12   6  137.45   30.36   1
  -1  12  -6  133.08   19.75   2
  -2  12  -6   29.08   12.90   2
   2 -12   6   22.98   20.22   1
   3 -12   6  156.60   30.30   1
  -3  12  -6  175.44   22.77   2
  -4  12  -6   88.64   16.81   2
   4 -12   6   75.82   23.54   1
  -5  12  -6   30.72   13.37   2
   5 -12   6   17.03   18.92   1
   6 -12   6   57.63   20.47   1
  -6  12  -6  100.85   19.60   2
   7 -12   6   10.79   15.69   1
  -7  12  -6   20.68   13.80   2
  -7 -11   6    4.75   24.71   1
  -6 -11   6  223.69   41.19   1
  -5 -11   6    6.49   24.15   1
  -4 -11   6  -39.86   20.39   1
  -3 -11   6   43.14   24.23   1
  -2 -11   6   90.25   29.46   1
  -1 -11   6  145.74   32.01   1
   0  11  -6   -0.52    9.33   2
   0 -11   6  -16.17   17.28   1
  -1  11  -6  238.27   24.28   2
   1 -11   6  179.89   34.69   1
   2 -11   6   22.05   20.02   1
  -2  11  -6   14.09   11.01   2
  -3  11  -6   12.64   11.82   2
   3 -11   6   41.92   20.40   1
   4 -11   6   40.72   19.44   1
  -4  11  -6   48.51   13.98   2
   5 -11   6   96.36   25.42   1
  -5  11  -6  144.47   21.28   2
   6 -11   6  146.10   27.80   1
  -6  11  -6  185.48   24.63   2
   7 -11   6   60.45   19.37   1
  -7  11  -6   14.74   12.65   2
   8 -11   6  154.35   29.94   1
  -8  11  -6  179.56   27.44   2
  -9  11  -6    0.71   11.82   2
   9 -11   6   12.37   17.29   1
   9  10  -6  130.74   28.53   3
  -8 -10   6  180.42   35.73   1
   8  10  -6  247.29   35.65   3
  -7 -10   6    5.58   25.56   1
   7  10  -6   72.54   20.60   3
  -6 -10   6   49.60   25.70   1
   6  10  -6   52.28   17.05   3
  -5 -10   6   -8.83   21.81   1
  -3 -10   6   46.86   24.55   1
  -2 -10   6   59.97   25.78   1
  -1 -10   6  221.45   38.50   1
   0 -10   6   83.58   25.39   1
   0  10  -6  138.31   18.32   2
  -1  10  -6  110.40   17.47   2
   1 -10   6   63.45   24.51   1
   2 -10   6   30.46   19.25   1
  -2  10  -6   28.05   11.41   2
  -3  10  -6  519.65   44.55   2
   3 -10   6  519.12   51.94   1
   4 -10   6  235.10   36.87   1
  -4  10  -6  279.77   28.27   2
   5 -10   6   38.36   17.23   1
  -5  10  -6   36.55   13.30   2
   6 -10   6   85.45   21.76   1
  -6  10  -6   63.33   16.37   2
   7 -10   6   62.26   18.77   1
  -7  10  -6   71.43   17.23   2
   8 -10   6  111.18   26.47   1
  -8  10  -6  103.08   21.52   2
  -9  10  -6   15.18   12.51   2
   9 -10   6  -12.99   13.10   1
 -10  10  -6  210.27   31.59   2
  10 -10   6  260.16   38.83   1
  11 -10   6  191.44   31.81   1
  10   9  -6   33.28   21.80   3
   9   9  -6  149.36   29.81   3
   8   9  -6   52.14   19.49   3
  -8  -9   6   35.33   25.80   1
   7   9  -6   14.09   15.03   3
  -7  -9   6   11.13   24.72   1
   6   9  -6  286.78   35.23   3
  -6  -9   6  203.11   37.90   1
  -5  -9   6   71.03   27.33   1
   5   9  -6   22.47   14.04   3
  -4  -9   6   37.96   22.39   1
   4   9  -6   29.70   13.59   3
  -3  -9   6    7.88   22.15   1
  -2  -9   6  269.35   42.70   1
  -1  -9   6   48.21   22.50   1
   1   9  -6   66.27   13.14   2
   0   9  -6    3.67    8.73   2
   0  -9   6  -25.71   15.31   1
   1  -9   6  166.35   31.22   1
  -1   9  -6  190.04   20.51   2
   2  -9   6    0.90   15.12   1
  -2   9  -6   13.36    9.97   2
  -3   9  -6   42.58   13.27   2
   3  -9   6   30.44   18.37   1
   4  -9   6  106.22   25.14   1
  -4   9  -6   95.89   17.67   2
   5  -9   6  516.47   51.94   1
  -5   9  -6  606.53   48.39   2
  -6   9  -6  198.47   25.47   2
   6  -9   6  165.33   30.22   1
  -7   9  -6   18.87   12.98   2
   7  -9   6    7.42   15.00   1
  -8   9  -6  227.37   28.56   2
   8  -9   6  178.70   30.82   1
   9  -9   6   57.74   19.50   1
  -9   9  -6   27.39   13.25   2
 -10   9  -6  268.75   34.78   2
  10  -9   6  262.32   37.82   1
 -11   9  -6   31.50   18.60   2
  11  -9   6   -0.07   13.88   1
  12  -9   6  146.39   28.82   1
  10   8  -6   15.57   18.27   3
  -9  -8   6   80.64   25.05   1
   9   8  -6   59.40   20.65   3
   8   8  -6  156.80   26.80   3
  -8  -8   6   85.99   26.65   1
  -7  -8   6  278.36   39.34   1
   7   8  -6  267.59   36.18   3
   6   8  -6   44.03   16.06   3
  -6  -8   6   69.47   27.90   1
  -5  -8   6   24.49   21.01   1
   5   8  -6    1.70   11.72   3
   4   8  -6 1136.62   88.95   3
   3   8  -6   23.83   11.88   3
  -3  -8   6   20.61   22.56   1
   2   8  -6   12.75    9.17   3
  -2  -8   6   -1.17   20.02   1
  -1  -8   6  122.55   29.92   1
   1   8  -6  115.94   16.08   2
   0   8  -6  170.44   19.68   2
   0  -8   6  164.00   31.24   1
   1  -8   6  172.17   31.39   1
  -1   8  -6  171.09   19.98   2
   2  -8   6   48.40   18.97   1
  -2   8  -6   39.96   12.19   2
   3  -8   6  862.60   71.07   1
  -3   8  -6  867.90   65.60   2
  -4   8  -6   25.13   12.08   2
   4  -8   6   30.89   17.42   1
  -5   8  -6  384.93   36.10   2
   5  -8   6  397.90   44.39   1
   6  -8   6  109.74   24.56   1
  -6   8  -6  106.14   19.53   2
   7  -8   6   86.94   23.37   1
  -7   8  -6  101.39   19.31   2
  -8   8  -6  432.89   40.70   2
   8  -8   6  413.80   47.49   1
   9  -8   6   -1.26   12.51   1
  -9   8  -6   -1.15   12.22   2
  10  -8   6  303.17   40.42   1
 -10   8  -6  340.33   37.32   2
  11  -8   6   20.01   15.83   1
 -11   8  -6  -22.51   12.76   2
  12  -8   6  120.35   26.76   1
 -12   8  -6  117.75   26.67   2
  13  -8   6   63.79   18.88   1
  11   7  -6   22.58   18.87   3
  10   7  -6   -1.17   15.90   3
 -10  -7   6    5.81   18.71   1
  -9  -7   6  254.52   34.66   1
   9   7  -6  222.38   35.78   3
   8   7  -6   38.19   16.77   3
  -8  -7   6   12.79   19.96   1
  -7  -7   6  163.86   32.16   1
   7   7  -6  185.19   29.00   3
  -6  -7   6  341.58   45.34   1
   6   7  -6  330.17   36.32   3
  -5  -7   6   28.26   22.43   1
   5   7  -6   10.38   13.96   3
   4   7  -6    8.95   10.08   3
  -4  -7   6   -3.55   22.69   1
   3   7  -6    5.10    9.17   3
  -3  -7   6  -10.71   20.95   1
   2   7  -6  973.19   74.24   3
  -2  -7   6  927.85   78.55   1
   2   7  -6  969.00   68.81   2
   1   7  -6   10.14    7.65   2
  -1  -7   6   19.56   19.36   1
   1   7  -6   12.26    8.95   3
   0  -7   6  -20.51   18.14   1
   0   7  -6   17.16    8.43   2
  -1   7  -6  480.31   38.65   2
   1  -7   6  470.99   47.73   1
   2  -7   6  131.31   25.04   1
  -2   7  -6  123.63   17.21   2
  -3   7  -6  188.27   21.33   2
   3  -7   6  160.52   28.41   1
  -4   7  -6  111.47   17.69   2
   4  -7   6  111.98   24.10   1
  -5   7  -6  907.26   68.48   2
   5  -7   6  881.74   70.32   1
  -6   7  -6  399.56   36.87   2
   6  -7   6  383.94   43.20   1
  -7   7  -6   68.85   16.41   2
   7  -7   6   68.55   20.67   1
   8  -7   6  476.01   45.61   1
  -8   7  -6  459.89   43.09   2
  -9   7  -6   78.67   18.68   2
   9  -7   6   69.75   20.60   1
  10  -7   6  236.89   34.72   1
 -10   7  -6  274.98   34.36   2
 -11   7  -6  -17.96   12.84   2
  11  -7   6    9.01   14.93   1
  12  -7   6   61.48   19.75   1
 -12   7  -6   90.09   23.67   2
 -13   7  -6  268.44   39.98   2
  13  -7   6  302.48   38.90   1
  14  -7   6   34.74   15.59   1
  12   6  -6   87.81   23.98   3
  11   6  -6  373.66   46.92   3
 -11  -6   6  357.45   40.72   1
 -10  -6   6   81.35   21.03   1
  10   6  -6   60.25   20.57   3
  -9  -6   6   65.42   22.41   1
   9   6  -6   80.78   21.53   3
   8   6  -6   -2.62   12.26   3
  -8  -6   6   20.29   19.06   1
   7   6  -6  405.34   41.22   3
  -7  -6   6  378.36   44.76   1
   6   6  -6  151.34   25.02   3
  -6  -6   6  163.55   31.34   1
   5   6  -6   48.70   14.50   3
  -5  -6   6   29.74   22.81   1
   4   6  -6  970.23   76.85   3
  -4  -6   6  983.42   78.67   1
  -3  -6   6   60.77   24.31   1
   3   6  -6   39.38   13.75   3
   2   6  -6   52.97   13.10   3
   2   6  -6   32.40    8.29   2
  -2  -6   6   29.09   23.19   1
   1   6  -6   48.65   10.35   2
  -1  -6   6   84.50   22.79   1
   1   6  -6   44.10   12.90   3
   0  -6   6  385.52   44.68   1
   0   6  -6  414.33   32.83   2
   0   6  -6  421.37   36.05   3
  -1   6  -6  338.68   32.67   3
   1  -6   6  428.97   41.50   1
  -1   6  -6  355.29   31.05   2
   2  -6   6  108.15   23.75   1
  -2   6  -6  126.19   16.03   2
  -3   6  -6  369.33   32.31   2
   3  -6   6  380.09   38.15   1
   4  -6   6  122.63   24.59   1
  -4   6  -6  105.71   16.49   2
   5  -6   6  311.62   37.12   1
  -5   6  -6  347.74   31.63   2
   6  -6   6   89.37   21.54   1
  -6   6  -6   90.84   17.72   2
  -7   6  -6  930.00   70.57   2
   7  -6   6  878.99   70.29   1
   8  -6   6  736.71   59.41   1
  -8   6  -6  686.60   58.65   2
   9  -6   6    3.73   12.79   1
  -9   6  -6   -6.37   12.57   2
  10  -6   6  337.67   39.77   1
 -10   6  -6  317.53   37.78   2
 -11   6  -6    2.31   13.97   2
  11  -6   6   19.12   14.84   1
  12  -6   6  145.15   27.16   1
 -12   6  -6  175.17   30.70   2
  13  -6   6  -18.03   13.38   1
 -13   6  -6    3.53   16.64   2
  14  -6   6  306.02   38.73   1
 -14   6  -6  298.01   42.54   2
  12   5  -6   76.37   18.81   3
 -12  -5   6   85.38   19.76   1
  11   5  -6   52.71   19.26   3
 -11  -5   6   50.80   19.13   1
 -10  -5   6   27.99   17.31   1
  10   5  -6    3.34   13.97   3
   9   5  -6  512.40   51.10   3
  -9  -5   6  541.05   46.80   1
  -8  -5   6   35.01   17.37   1
   8   5  -6   30.19   13.31   3
   7   5  -6  169.08   26.87   3
  -7  -5   6  144.66   28.69   1
  -6  -5   6  177.33   30.77   1
   6   5  -6  163.67   25.13   3
  -5  -5   6  243.72   35.75   1
   5   5  -6  223.86   28.28   3
  -4  -5   6   44.35   22.37   1
   4   5  -6   12.26   10.14   3
   3   5  -6    9.79    5.74   2
   3   5  -6   26.97   10.67   3
  -3  -5   6    7.14   19.06   1
  -2  -5   6 1453.90  103.27   1
   2   5  -6 1397.22   97.21   2
   2   5  -6 1404.79  104.31   3
   1   5  -6  248.45   26.21   3
   1   5  -6  292.26   22.81   2
  -1  -5   6  258.81   36.92   1
   0   5  -6   -0.62    7.72   3
   0  -5   6    9.54   16.02   1
   0   5  -6    2.50    6.50   2
  -1   5  -6 1206.02   89.28   3
  -1   5  -6 1180.32   84.61   2
   1  -5   6 1235.92   87.91   1
   2  -5   6  486.17   45.30   1
  -2   5  -6  503.90   40.63   2
  -2   5  -6  585.00   43.77   3
  -3   5  -6  175.25   20.39   3
  -3   5  -6  228.47   21.96   2
   3  -5   6  238.53   29.92   1
   4  -5   6   -1.32   11.35   1
  -4   5  -6    3.25    8.20   2
   5  -5   6  531.63   48.91   1
  -5   5  -6  671.15   48.79   2
   6  -5   6  301.19   34.29   1
  -6   5  -6  286.01   28.87   2
   7  -5   6    2.28   11.02   1
  -7   5  -6   -2.04    9.95   2
   8  -5   6   83.86   19.28   1
  -8   5  -6   34.82   14.54   2
   9  -5   6  331.46   37.26   1
  -9   5  -6  300.67   35.14   2
 -10   5  -6  329.21   36.35   2
  10  -5   6  307.15   36.57   1
 -11   5  -6    9.53   14.77   2
  11  -5   6   30.58   12.60   1
  12  -5   6  342.71   41.84   1
 -12   5  -6  472.65   45.97   2
  13  -5   6   96.28   21.31   1
 -13   5  -6   77.85   22.48   2
 -14   5  -6   77.43   23.88   2
 -15   5  -6   49.04   20.99   2
  13   4  -6   33.44   15.05   3
 -12  -4   6  139.88   23.60   1
  12   4  -6  106.30   23.20   3
  11   4  -6  371.88   40.29   3
 -11  -4   6  351.38   35.90   1
 -10  -4   6   30.64   16.41   1
  10   4  -6   48.13   17.21   3
   9   4  -6   71.91   18.94   3
  -9  -4   6   83.59   21.35   1
  -8  -4   6   22.47   16.31   1
   8   4  -6   13.51   14.45   3
  -7  -4   6  622.14   52.67   1
   7   4  -6  658.05   56.45   3
   6   4  -6   10.49   11.22   3
  -6  -4   6   12.05   15.92   1
  -5  -4   6  165.60   28.65   1
   5   4  -6  204.07   25.32   3
   4   4  -6  438.49   39.87   3
  -4  -4   6  452.49   44.19   1
   3   4  -6   27.00    5.57   2
  -3  -4   6    7.44   17.68   1
   3   4  -6   30.33   10.66   3
   2   4  -6   52.91   12.69   3
  -2  -4   6   68.04   20.95   1
   2   4  -6   45.68    7.75   2
   1   4  -6   -3.40    4.75   2
  -1  -4   6    2.74   14.21   1
   1   4  -6    0.00    6.98   3
   0  -4   6 1791.80  130.39   1
   0   4  -6 2075.29  140.38   3
   0   4  -6 2003.20  132.87   2
  -1   4  -6  118.30   16.80   3
   1  -4   6  114.75   23.03   1
  -1   4  -6   98.44   13.01   2
   2  -4   6  134.80   22.84   1
  -2   4  -6  107.65   14.33   2
  -2   4  -6  131.53   17.06   3
  -3   4  -6  782.47   51.25   2
   3  -4   6  621.06   52.14   1
  -3   4  -6  611.25   51.16   3
   4  -4   6    3.77   11.02   1
  -4   4  -6   16.06    4.84   3
  -4   4  -6   16.05    8.40   2
  -5   4  -6   55.26   13.16   2
   5  -4   6   76.74   18.48   1
  -6   4  -6   66.20   13.83   2
   6  -4   6   41.32   15.64   1
  -7   4  -6 1619.92  112.77   2
   7  -4   6 1498.15  106.33   1
  -8   4  -6  293.64   31.43   2
   8  -4   6  282.20   32.90   1
   9  -4   6  273.13   32.51   1
  -9   4  -6  246.24   31.32   2
 -10   4  -6  716.35   60.10   2
  10  -4   6  677.38   56.34   1
 -11   4  -6   10.21   13.47   2
  11  -4   6   34.32   12.08   4
  11  -4   6    8.91   10.48   1
  12  -4   6  471.49   40.00   4
  12  -4   6  476.76   43.96   1
 -12   4  -6  516.35   49.66   2
  13  -4   6   25.03   12.38   4
  13  -4   6   75.70   19.06   1
 -13   4  -6   51.69   20.38   2
 -14   4  -6  157.34   30.69   2
 -15   4  -6  212.05   35.64   2
  13   3  -6   40.54   16.39   3
 -13  -3   6   24.52   15.10   1
  12   3  -6  195.96   30.13   3
 -12  -3   6  220.53   28.78   1
 -11  -3   6   61.38   16.89   1
  11   3  -6   33.01   15.96   3
 -10  -3   6  134.72   23.20   1
  10   3  -6  115.84   22.80   3
  -9  -3   6 1356.46   96.22   1
   9   3  -6 1463.86  110.67   3
   8   3  -6  -14.22   10.12   3
  -8  -3   6   13.72   14.49   1
  -7  -3   6   95.65   20.52   1
   7   3  -6   84.65   18.78   3
  -6  -3   6  231.19   29.85   1
   6   3  -6  296.87   30.38   3
  -5  -3   6  362.02   35.79   1
   5   3  -6  389.15   36.18   3
  -4  -3   6   62.01   19.59   1
   4   3  -6   80.91   15.26   3
   3   3  -6   65.59    7.79   2
   3   3  -6   83.39   14.64   3
  -3  -3   6   82.78   21.63   1
   2   3  -6 1350.04   91.50   2
  -2  -3   6 1404.08   95.29   1
   2   3  -6 1302.86   99.06   3
   1   3  -6   47.76    7.52   2
   1   3  -6   51.88   12.10   3
  -1  -3   6   54.47   18.49   1
   0   3  -6    7.13    5.59   2
   0   3  -6   -1.31    7.84   3
   0  -3   6   28.77   16.22   1
  -1   3  -6  212.53   22.72   3
  -1   3  -6  167.34   17.59   2
   1  -3   6  203.08   27.44   1
   2  -3   6  764.18   58.08   1
  -2   3  -6  720.20   59.43   3
  -2   3  -6  813.17   55.67   2
   3  -3   6  716.75   58.70   1
  -3   3  -6  864.31   59.37   2
  -3   3  -6  847.68   61.07   3
  -4   3  -6   18.13    5.78   3
  -4   3  -6    3.70    7.38   2
   4  -3   6   20.61   11.56   1
  -5   3  -6 1071.68   75.07   3
  -5   3  -6 1094.17   76.20   2
   5  -3   6  956.88   72.72   1
   6  -3   6   29.89   11.76   1
  -6   3  -6   20.71    6.11   3
  -6   3  -6   13.12    9.38   2
  -7   3  -6   77.29   16.15   2
   7  -3   6  104.65   19.18   1
   8  -3   6   65.65   15.24   1
  -8   3  -6   19.88   12.99   2
  -9   3  -6  590.77   50.96   2
   9  -3   6  557.04   47.05   1
  10  -3   6  236.55   29.37   1
 -10   3  -6  241.82   31.73   2
  10  -3   6  247.13   26.65   4
  11  -3   6   29.68   12.36   1
 -11   3  -6   51.30   18.59   2
  11  -3   6   70.12   14.33   4
  12  -3   6  735.32   59.89   1
  12  -3   6  811.37   55.22   4
 -12   3  -6  728.17   65.68   2
 -13   3  -6    1.18   14.07   2
 -14   3  -6  255.98   37.24   2
 -15   3  -6   55.47   20.97   2
 -16   3  -6  119.28   23.39   2
  14   2  -6  121.95   23.08   3
 -14  -2   6  134.14   22.34   1
  13   2  -6   10.51   12.51   3
 -13  -2   6    2.50   13.52   1
  12   2  -6  211.54   31.13   3
 -12  -2   6  220.74   28.22   1
 -11  -2   6  191.85   26.27   1
  11   2  -6  177.47   28.00   3
 -10  -2   6  116.33   20.57   1
  10   2  -6   69.00   17.90   3
  -9  -2   6   -0.26   13.51   1
   9   2  -6   -5.99   12.25   3
  -8  -2   6   27.04   14.98   1
   8   2  -6   30.32   13.09   3
   7   2  -6  860.02   72.60   3
  -7  -2   6  965.28   66.05   1
  -6  -2   6   66.03   15.50   1
   6   2  -6   39.72   13.05   3
   5   2  -6  199.40   24.59   3
  -5  -2   6  199.41   24.96   1
   4   2  -6  282.69   27.64   3
  -4  -2   6  256.66   29.22   1
  -3  -2   6  490.14   40.32   1
   3   2  -6  415.84   38.41   3
   2   2  -6   14.37    9.09   3
   2   2  -6   13.10    4.18   2
  -2  -2   6   11.68   13.86   1
   1   2  -6  394.12   33.55   3
  -1  -2   6  371.91   35.94   1
   1   2  -6  348.80   27.14   2
   0  -2   6 2046.91  150.76   1
   0   2  -6 2414.18  157.87   2
   0   2  -6 2598.18  168.03   3
   1  -2   6   -1.23   10.55   1
  -1   2  -6   13.69    9.24   3
  -1   2  -6   10.99    6.07   2
  -2   2  -6   14.83    9.02   3
   2  -2   6   16.85   12.12   1
  -2   2  -6   21.75    7.59   2
   3  -2   6 1624.13  110.97   1
  -3   2  -6 1765.83  117.39   2
  -3   2  -6 1713.90  121.11   3
  -4   2  -6  731.66   54.48   2
   4  -2   6  732.44   53.49   1
  -5   2  -6  170.14   19.73   2
  -5   2  -6  137.27   16.95   3
   5  -2   6  214.21   23.31   1
  -6   2  -6   16.06    9.88   2
   6  -2   6   23.59   10.44   1
  -6   2  -6   24.87    7.00   3
  -7   2  -6 1068.46   81.73   2
  -7   2  -6 1117.90   80.75   3
   7  -2   6 1131.27   76.94   1
  -8   2  -6  122.19   15.26   3
  -8   2  -6  118.48   20.06   2
   8  -2   6  111.60   19.64   1
   8  -2   6  113.29   17.79   4
  -9   2  -6   65.80   17.92   2
   9  -2   6   80.19   16.35   1
   9  -2   6   64.15   14.84   4
  10  -2   6  451.87   39.18   1
  10  -2   6  423.54   34.96   4
 -10   2  -6  442.58   42.61   2
  11  -2   6  299.61   32.34   1
  11  -2   6  322.16   28.15   4
 -11   2  -6  266.90   34.39   2
 -12   2  -6  564.65   52.28   2
 -13   2  -6   -5.11   13.29   2
 -14   2  -6  143.30   27.26   2
 -15   2  -6  113.92   24.89   2
 -16   2  -6   25.93   18.46   2
 -15  -1   6   60.55   15.14   1
 -14  -1   6   70.36   17.43   1
  14   1  -6   38.99   16.17   3
 -13  -1   6    2.91   12.76   1
  13   1  -6    0.99   12.89   3
 -12  -1   6  282.26   31.65   1
  12   1  -6  271.12   35.57   3
 -11  -1   6  212.37   26.71   1
  11   1  -6  189.31   29.20   3
  10   1  -6  625.41   55.70   3
 -10  -1   6  583.13   47.31   1
  -9  -1   6 1103.96   73.82   1
   9   1  -6  996.70   83.70   3
  -8  -1   6  165.75   22.49   1
   8   1  -6  151.71   23.75   3
   7   1  -6  244.50   27.12   3
  -7  -1   6  233.24   25.95   1
  -6  -1   6   45.69   13.06   1
   6   1  -6   42.41   13.55   3
   5   1  -6 1628.38  130.41   3
  -5  -1   6 1976.79  116.87   1
  -4  -1   6   49.74   13.72   1
   4   1  -6   47.76   12.07   3
   3   1  -6  598.63   50.31   3
  -3  -1   6  658.15   47.58   1
   2   1  -6  778.36   57.40   3
  -2  -1   6  673.29   52.57   1
  -1  -1   6   21.11   12.87   1
   1   1  -6    9.40    4.35   2
   1   1  -6   13.32    9.42   3
   0   1  -6   37.35    6.67   2
   0   1  -6   41.54   11.42   3
   0  -1   6   26.20   13.70   1
  -1   1  -6   60.96   13.98   3
  -1   1  -6   57.22    9.00   2
   1  -1   6   78.01   16.82   1
   2  -1   6 2511.48  158.06   1
  -2   1  -6 2436.56  168.75   2
  -2   1  -6 2561.37  176.49   3
  -3   1  -6  185.35   19.54   3
  -3   1  -6  197.95   19.07   2
   3  -1   6  195.93   22.11   1
  -4   1  -6  279.06   24.87   2
   4  -1   6  266.62   24.92   1
  -4   1  -6  248.97   24.03   3
  -5   1  -6 1412.61  103.88   3
   5  -1   6 1444.78   95.18   1
  -5   1  -6 1514.48  103.01   2
  -6   1  -6  242.65   25.20   3
  -6   1  -6  316.63   27.83   2
   6  -1   6  300.74   26.35   1
  -7   1  -6  268.17   25.24   3
   7  -1   6  268.65   25.78   1
  -7   1  -6  284.57   27.69   2
  -8   1  -6   88.20   13.63   3
   8  -1   6   57.73   14.01   1
   8  -1   6   81.77   14.19   4
  -8   1  -6   75.06   16.46   2
  -9   1  -6  887.52   73.82   2
  -9   1  -6  970.93   73.16   3
   9  -1   6  994.99   68.60   1
   9  -1   6 1000.91   62.32   4
 -10   1  -6  897.87   70.03   2
  10  -1   6  859.27   63.78   1
 -10   1  -6  876.12   67.83   3
  10  -1   6  863.82   58.12   4
  11  -1   6   34.53   10.94   4
 -11   1  -6    5.71   13.48   2
  11  -1   6   11.53   11.54   1
 -12   1  -6  490.88   47.39   2
 -13   1  -6   72.96   19.74   2
 -14   1  -6  228.43   34.23   2
 -15   1  -6   48.89   20.37   2
  16  -1   6  256.41   45.49   2
 -15   0   6   83.96   18.46   1
  15   0  -6   85.99   20.27   3
 -14   0   6  228.17   28.33   1
  14   0  -6  208.66   30.95   3
 -13   0   6   -5.62   12.27   1
  13   0  -6   24.81   14.17   3
 -12   0   6  300.37   29.77   1
  12   0  -6  286.11   37.01   3
  11   0  -6  104.22   21.86   3
 -11   0   6  156.88   22.06   1
 -10   0   6  256.15   28.18   1
  10   0  -6  251.67   32.48   3
  -9   0   6    2.48   11.16   1
   9   0  -6   12.86    9.85   3
  -8   0   6   23.65   12.04   1
   8   0  -6   20.83   10.95   3
  -7   0   6 1000.45   66.41   1
   7   0  -6  921.36   75.34   3
  -6   0   6   28.73   11.05   1
   6   0  -6   49.26   13.22   3
   5   0  -6  112.88   17.91   3
  -5   0   6  108.92   16.16   1
  -4   0   6  674.03   46.55   1
  -4   0   6  675.53   46.55   1
   4   0  -6  603.93   52.13   3
  -3   0   6 1408.67   91.44   1
   3   0  -6 1418.10  103.71   3
  -2   0   6   34.83   10.98   1
   2   0  -6   25.56   10.13   3
   1   0  -6   24.57   10.45   3
  -1   0   6   20.00   10.73   1
  -1   0   6   26.79    5.16   2
   0   0   6 2290.07  146.81   1
   0   0  -6 2390.46  156.40   2
   1   0   6   12.77   11.39   1
  -1   0  -6   13.82    9.62   3
  -1   0  -6   14.27    5.56   2
  -2   0  -6   79.66   12.42   3
   2   0   6   59.29   13.40   1
  -2   0  -6   47.12    8.84   2
   3   0   6  213.02   21.12   1
  -3   0  -6  208.91   20.43   3
  -3   0  -6  208.01   19.20   2
   4   0   6 1368.23   90.15   1
  -4   0  -6 1402.15  100.25   3
  -4   0  -6 1431.65   97.83   2
   5   0   6  440.26   32.94   1
  -5   0  -6  426.00   34.86   2
  -5   0  -6  415.38   35.19   3
  -6   0  -6  141.92   16.97   3
   6   0   6  145.93   16.85   1
  -6   0  -6  144.57   17.99   2
  -7   0  -6  694.59   53.49   2
   7   0   6  683.31   48.97   1
  -7   0  -6  719.22   53.85   3
   7   0   6  660.66   44.12   4
   8   0   6   12.37    8.19   4
   8   0   6   15.26    8.86   1
  -8   0  -6   14.67   10.26   2
  -8   0  -6    3.84    7.79   3
   9   0   6   48.34   11.09   4
   9   0   6   40.56   12.02   1
  -9   0  -6   48.83   12.46   3
  -9   0  -6   40.55   14.11   2
  10   0   6   52.54   12.97   4
 -10   0  -6   91.73   18.79   2
 -10   0  -6  101.50   16.03   3
  10   0   6   66.46   15.87   1
 -11   0  -6  618.92   48.87   3
 -11   0  -6  496.44   48.87   2
 -12   0  -6  301.05   37.43   2
 -12   0  -6  391.46   35.78   3
 -13   0  -6   57.42   18.97   2
  14   0   6  353.78   48.97   2
  15   0   6   -5.71   20.53   2
  16   0   6  183.32   36.88   2
 -15   1   6   69.45   16.95   1
  15  -1  -6   83.41   18.95   3
  14  -1  -6   88.84   20.51   3
 -14   1   6  129.14   21.12   1
  13  -1  -6    0.26   13.07   3
 -13   1   6   21.20   12.26   1
 -12   1   6  723.84   53.10   1
  12  -1  -6  667.31   61.49   3
  11  -1  -6   59.63   17.24   3
 -11   1   6  110.19   19.10   1
  10  -1  -6  636.86   55.21   3
 -10   1   6  607.71   47.13   1
  -9   1   6   62.13   14.57   1
   9  -1  -6   73.43   16.88   3
  -8   1   6    1.04    9.55   1
   8  -1  -6    3.83    8.87   3
  -7   1   6   80.49   15.14   1
   7  -1  -6   86.42   17.45   3
   6  -1  -6  163.86   21.98   3
  -6   1   6  166.18   18.88   1
  -5   1   6 3403.49  208.31   1
   5  -1  -6 3367.76  238.06   3
  -4   1   6   66.52   12.35   1
   4  -1  -6   77.83   14.92   3
  -3   1   6  346.38   27.76   1
   3  -1  -6  373.79   33.45   3
   2  -1  -6 2069.58  142.30   3
  -2   1   6 1876.75  122.62   1
  -1   1   6  928.53   66.24   1
   1  -1  -6 1144.34   79.19   3
  -1   1   6 1011.27   70.32   2
   0   1   6   -2.62    4.01   2
   0  -1  -6    4.71    9.12   3
   0   1   6    5.64    6.52   1
  -1  -1  -6   26.63   10.74   3
   1   1   6   37.42    8.42   2
   1   1   6   30.98    9.09   1
   2   1   6 2751.12  189.35   1
  -2  -1  -6 3366.63  215.93   3
   2   1   6 3166.43  209.88   2
  -3  -1  -6  287.61   24.12   3
   3   1   6  231.68   22.18   1
  -3  -1  -6  269.82   22.84   2
  -4  -1  -6   59.87   10.82   2
   4   1   6   54.96   10.32   1
  -4  -1  -6   65.72   11.03   3
  -5  -1  -6 1691.84  121.27   2
   5   1   6 1770.87  109.81   1
  -5  -1  -6 1794.82  124.79   3
  -6  -1  -6  994.55   75.04   3
   6   1   6 1011.73   66.12   1
  -6  -1  -6 1028.20   73.83   2
   7   1   6  186.29   17.93   1
   7   1   6  197.46   16.95   4
  -7  -1  -6  170.39   20.12   3
  -7  -1  -6  167.66   20.71   2
  -8  -1  -6   30.02   10.93   2
   8   1   6   -1.95    7.01   4
   8   1   6   22.56    9.33   1
  -8  -1  -6   17.16    9.56   3
  -9  -1  -6 1441.84  100.64   3
   9   1   6 1250.36   79.16   4
  -9  -1  -6 1301.64   98.68   2
   9   1   6 1399.19   89.14   1
 -10  -1  -6 1236.02   85.44   3
 -10  -1  -6  965.96   82.62   2
 -11  -1  -6   36.04   12.52   3
  11   1   6   20.16   18.56   2
 -12  -1  -6  241.48   28.07   3
  12   1   6  206.72   35.98   2
 -13  -1  -6   32.29   14.32   3
  13   1   6   24.64   19.04   2
  14   1   6  328.77   46.92   2
  15   1   6    5.11   21.85   2
 -15   2   6  223.90   28.44   1
 -14   2   6  364.17   34.70   1
  14  -2  -6  395.21   41.02   3
  13  -2  -6   33.57   15.06   3
 -13   2   6   17.07   12.73   1
 -12   2   6  397.09   35.05   1
  12  -2  -6  419.31   41.60   3
  11  -2  -6   -0.33   10.64   3
 -11   2   6   14.16   11.96   1
 -10   2   6  425.82   35.09   1
  10  -2  -6  404.29   40.09   3
  -9   2   6    1.42   10.40   1
   9  -2  -6    2.17    8.79   3
  -8   2   6  162.38   20.46   1
   8  -2  -6  190.25   24.39   3
   7  -2  -6 1627.12  121.12   3
  -7   2   6 1646.43  105.28   1
  -6   2   6   17.18    9.19   1
   6  -2  -6    7.25    8.89   3
  -6   2   6   18.54    4.13   2
   5  -2  -6  102.92   17.09   3
  -5   2   6   76.04   12.83   1
  -5   2   6   79.53    8.64   2
   4  -2  -6   88.40   15.85   3
  -4   2   6   79.04   12.26   1
  -4   2   6   50.56    7.16   2
  -3   2   6 1986.41  121.91   1
  -3   2   6 2001.88  131.35   2
   3  -2  -6 1888.99  141.04   3
  -2   2   6  147.78   15.80   1
  -2   2   6  171.07   15.10   2
   2  -2  -6  216.37   23.63   3
   1  -2  -6  142.82   20.04   3
  -1   2   6  189.67   14.80   2
  -1   2   6  146.63   14.39   1
   0  -2  -6 4842.59  372.56   3
   0   2   6 5519.83  325.04   1
   0   2   6 5837.58  359.64   2
   1   2   6   36.16    7.15   1
  -1  -2  -6   42.36   10.34   3
   1   2   6   31.42    8.11   2
   2   2   6   19.81    6.33   1
  -2  -2  -6   17.89    7.60   3
   2   2   6   23.68    8.30   2
   3   2   6   82.86   10.94   1
  -3  -2  -6   98.02   13.07   3
   3   2   6  104.34   14.66   2
  -4  -2  -6 1609.77  116.93   3
   4   2   6 1566.85  115.99   2
   4   2   6 1753.60  101.65   1
   5   2   6   78.47   10.20   1
   5   2   6   98.81   17.34   2
  -5  -2  -6   93.01   13.76   3
  -6  -2  -6   17.94    8.99   3
   6   2   6    4.97    5.91   1
   6   2   6   33.98   13.35   2
   6   2   6   15.68    5.86   4
   7   2   6 1662.25   99.47   4
   7   2   6 1886.13  111.52   1
  -7  -2  -6 1793.78  128.02   3
   7   2   6 1771.18  129.22   2
   8   2   6  134.38   16.29   1
   8   2   6  157.76   25.45   2
  -8  -2  -6  168.40   20.46   3
   8   2   6  115.88   13.63   4
   9   2   6  179.21   28.68   2
  -9  -2  -6  166.29   22.22   3
 -10  -2  -6    1.99    9.79   3
  10   2   6    6.88   15.80   2
 -11  -2  -6 1067.56   83.38   3
  11   2   6 1065.96   88.31   2
  12   2   6  108.11   25.21   2
 -12  -2  -6  110.25   20.12   3
 -13  -2  -6   10.74   12.62   3
  13   2   6   19.24   17.48   2
 -14  -2  -6  458.22   44.33   3
  14   2   6  419.56   52.75   2
 -15  -2  -6    2.31   13.08   3
  15   2   6   11.17   19.13   2
 -15   3   6   33.27   14.85   1
 -14   3   6   60.35   17.68   1
 -13   3   6  234.20   27.82   1
  12  -3  -6  570.79   51.41   3
 -12   3   6  523.21   43.15   1
  11  -3  -6    6.87   11.32   3
 -11   3   6   -4.82   10.23   1
 -10   3   6  330.32   29.50   1
  10  -3  -6  295.07   32.83   3
  -9   3   6  218.92   24.27   1
   9  -3  -6  207.32   27.60   3
  -8   3   6  136.76   18.98   1
   8  -3  -6  160.70   23.46   3
  -7   3   6   43.52   11.85   1
   7  -3  -6   38.25   13.61   3
  -6   3   6  582.64   43.97   1
   6  -3  -6  671.23   52.98   3
   5  -3  -6 1053.51   80.55   3
  -5   3   6 1046.94   68.94   1
   4  -3  -6  206.61   24.11   3
  -4   3   6  176.91   17.66   1
  -4   3   6  195.80   17.19   2
  -3   3   6  156.94   15.47   2
  -3   3   6  163.92   16.55   1
   3  -3  -6  193.16   23.30   3
   2  -3  -6 1126.65   86.39   3
  -2   3   6 1204.62   79.59   2
  -2   3   6 1102.62   72.38   1
   1  -3  -6 2159.25  154.01   3
  -1   3   6 2192.88  132.17   1
  -1   3   6 2124.94  146.31   2
   0   3   6   73.57   10.68   2
   0  -3  -6   65.55   13.04   3
   0   3   6   70.01    8.33   1
   1   3   6   54.57    7.05   1
  -1  -3  -6   81.06   12.25   3
   1   3   6   62.25   10.62   2
  -2  -3  -6 3091.73  222.77   3
   2   3   6 3260.18  217.48   2
   2   3   6 3283.78  192.81   1
  -3  -3  -6   22.14    7.80   3
   3   3   6    9.47    8.54   2
   4   3   6   -3.59    7.53   2
  -4  -3  -6    2.84    6.84   3
   5   3   6  177.63   21.86   2
  -5  -3  -6  144.71   18.10   3
   6   3   6  822.88   63.51   2
  -6  -3  -6  773.38   61.24   3
   7   3   6  361.25   35.43   2
   7   3   6  334.51   26.00   1
  -7  -3  -6  380.01   33.03   3
   7   3   6  334.86   23.09   4
   8   3   6   84.09   19.88   2
  -8  -3  -6   73.29   15.23   3
   9   3   6 1413.61  106.86   2
  -9  -3  -6 1378.31  104.19   3
  10   3   6   -2.97   14.36   2
 -10  -3  -6   10.57   10.71   3
  11   3   6   25.01   15.87   2
 -11  -3  -6   12.42   11.20   3
  12   3   6   60.33   20.20   2
 -12  -3  -6   50.91   15.16   3
 -13  -3  -6  148.24   25.01   3
  13   3   6  144.93   28.67   2
  14   3   6  491.38   54.10   2
 -14  -3  -6  549.03   50.54   3
 -15  -3  -6   20.15   14.73   3
  15   3   6   15.66   18.61   2
 -16  -3  -6  284.76   36.97   3
 -14   4   6  332.32   35.09   1
 -13   4   6    4.42   11.83   1
 -12   4   6  247.00   27.96   1
  11  -4  -6   17.82   12.05   3
 -11   4   6   -2.99   10.37   1
 -10   4   6  582.10   43.46   1
  10  -4  -6  532.41   49.45   3
  -9   4   6   57.69   14.26   1
   9  -4  -6   86.65   17.35   3
  -8   4   6  827.77   58.38   1
   8  -4  -6  850.87   68.38   3
   7  -4  -6  908.52   73.16   3
  -7   4   6  938.88   62.93   1
   6  -4  -6    1.53    9.87   3
  -6   4   6    2.40    5.65   2
  -6   4   6   18.23    8.13   1
  -5   4   6    5.14    6.94   1
  -5   4   6    2.93    5.24   2
   5  -4  -6    9.55    9.80   3
  -4   4   6   18.74    7.83   1
  -4   4   6   16.65    6.43   2
   4  -4  -6   28.84   11.80   3
  -3   4   6  744.30   49.43   1
  -3   4   6  770.68   53.99   2
   3  -4  -6  711.76   59.17   3
  -2   4   6   21.95    7.10   1
  -2   4   6   19.26    7.46   2
   2  -4  -6   12.27    9.80   3
   1  -4  -6  482.85   39.49   3
  -1   4   6  475.47   32.10   1
  -1   4   6  459.82   36.72   2
   0   4   6  954.86   76.34   2
   0  -4  -6 1193.82   80.11   3
   0   4   6 1104.25   67.43   1
  -1  -4  -6  289.84   24.93   3
   1   4   6  282.59   18.95   1
   1   4   6  258.54   24.44   2
  -2  -4  -6   75.35   11.87   3
   2   4   6   63.59   12.38   2
  -3  -4  -6  186.21   20.07   3
   3   4   6  205.84   21.27   2
   4   4   6 1667.58  119.64   2
  -4  -4  -6 1718.98  121.21   3
  -5  -4  -6  232.12   23.47   3
   5   4   6  213.80   24.24   2
   6   4   6   -1.48    8.67   2
  -6  -4  -6    0.11    7.05   3
   7   4   6 1854.36  134.05   2
  -7  -4  -6 1858.93  134.30   3
   8   4   6  499.61   47.55   2
  -8  -4  -6  552.91   45.89   3
  -9  -4  -6   71.95   16.28   3
   9   4   6   60.01   18.73   2
  10   4   6   31.15   15.92   2
 -10  -4  -6   11.92   10.77   3
  11   4   6  809.18   69.47   2
 -11  -4  -6  775.93   65.50   3
 -12  -4  -6  177.62   25.99   3
  12   4   6  172.92   29.87   2
 -13  -4  -6    0.96   10.79   3
  13   4   6    3.37   15.96   2
  14   4   6  134.54   27.46   2
 -14  -4  -6  172.35   27.27   3
 -15  -4  -6   41.94   16.96   3
 -16  -4  -6  167.15   28.56   3
 -14   5   6   10.14   13.13   1
 -13   5   6  281.03   31.10   1
 -12   5   6  279.45   30.51   1
 -11   5   6   68.41   16.44   1
 -10   5   6  417.53   35.37   1
   9  -5  -6   30.33   13.79   3
  -9   5   6   58.29   13.93   1
  -8   5   6 1041.44   68.79   1
   8  -5  -6 1004.89   79.78   3
  -8   5   6  967.70   73.63   2
  -7   5   6   11.63    8.19   2
   7  -5  -6    5.76   10.66   3
  -7   5   6   17.06    8.81   1
  -6   5   6  230.95   22.24   1
   6  -5  -6  234.36   28.48   3
  -6   5   6  277.08   24.12   2
  -5   5   6 1192.09   78.11   2
  -5   5   6 1004.39   70.29   1
   5  -5  -6 1045.68   82.87   3
  -4   5   6   26.69    7.78   1
  -4   5   6   17.01    7.48   2
   4  -5  -6   14.42   11.25   3
  -3   5   6  348.09   26.30   1
  -3   5   6  322.54   28.72   2
   3  -5  -6  374.49   32.56   3
  -2   5   6   35.57    9.43   2
  -2   5   6   32.29    7.57   1
   2  -5  -6   33.63   10.81   3
  -1   5   6 2336.28  166.09   2
   1  -5  -6 2614.82  171.30   3
  -1   5   6 2345.82  148.24   1
   0   5   6  148.97   17.07   2
   0   5   6  121.09   11.72   1
   0  -5  -6  134.08   16.01   3
  -1  -5  -6  221.47   19.33   1
  -1  -5  -6  309.23   24.88   3
   1   5   6  272.58   25.03   2
  -1  -5  -6  244.00   17.60   4
  -2  -5  -6 2135.93  131.20   1
  -2  -5  -6 2245.34  151.94   3
  -2  -5  -6 2091.34  117.51   4
  -3  -5  -6   82.56   13.68   3
   3   5   6   99.82   16.11   2
   4   5   6  130.93   18.57   2
   5   5   6  122.06   18.67   2
  -5  -5  -6  111.19   16.37   3
   6   5   6 1349.15   95.96   2
  -6  -5  -6 1229.36   95.03   3
   7   5   6  552.59   47.45   2
  -7  -5  -6  518.01   45.22   3
   8   5   6   95.28   19.66   2
  -8  -5  -6  111.29   18.62   3
   9   5   6  881.23   73.12   2
  -9  -5  -6  920.39   72.22   3
  10   5   6   82.52   21.11   2
 -10  -5  -6   92.60   18.72   3
  11   5   6   37.17   17.32   2
 -11  -5  -6   62.84   16.11   3
 -12  -5  -6   90.21   20.30   3
  12   5   6   72.02   19.70   2
 -13  -5  -6  843.16   69.87   3
  13   5   6  760.39   70.50   2
 -14  -5  -6  230.21   31.99   3
  14   5   6  212.02   33.80   2
 -15  -5  -6   21.88   13.56   3
 -14   6   6   60.71   17.46   1
 -13   6   6   30.52   13.98   1
 -12   6   6   73.57   17.73   1
 -11   6   6  129.88   20.69   1
 -10   6   6  689.06   51.52   1
  -9   6   6   62.91   14.56   1
  -8   6   6 1094.20   72.48   1
  -8   6   6 1036.06   79.11   2
  -7   6   6  311.81   28.27   1
  -7   6   6  353.48   31.87   2
   7  -6  -6  357.94   34.52   3
  -6   6   6  449.32   33.44   1
  -6   6   6  465.87   36.76   2
   6  -6  -6  354.43   37.83   3
   5  -6  -6  107.48   18.56   3
  -5   6   6  144.11   16.52   1
  -5   6   6  130.85   17.49   2
  -4   6   6  192.65   19.50   1
   4  -6  -6  226.74   24.14   3
  -4   6   6  236.59   22.44   2
  -3   6   6 1440.41   92.83   1
  -3   6   6 1441.48  103.58   2
   3  -6  -6 1536.99  106.93   3
   2  -6  -6   20.24    9.09   3
  -2   6   6   24.43    7.09   1
  -2   6   6   28.50    9.74   2
  -1   6   6  377.93   28.05   1
   1  -6  -6  417.60   33.56   3
  -1   6   6  410.21   34.24   2
   0  -6  -6 1054.60   68.60   1
   0  -6  -6  991.64   61.42   4
   0  -6  -6 1067.24   77.79   3
   0   6   6 1149.30   78.27   2
  -1  -6  -6 1571.01  101.37   3
  -1  -6  -6 1315.69   78.83   4
   1   6   6 1459.35  100.31   2
  -1  -6  -6 1267.75   87.73   1
   2   6   6  127.24   17.80   2
  -2  -6  -6  130.40   16.17   3
  -2  -6  -6  128.54   12.03   1
   3   6   6   25.64   10.64   2
  -3  -6  -6   32.01    9.99   3
   4   6   6 2592.33  183.48   2
  -4  -6  -6 2705.70  186.61   3
   5   6   6  234.04   26.42   2
  -5  -6  -6  201.23   23.08   3
   6   6   6   11.38   10.47   2
  -6  -6  -6   19.28   10.10   3
  -7  -6  -6  449.93   40.13   3
   7   6   6  457.83   42.15   2
   8   6   6  142.19   24.08   2
  -8  -6  -6  178.01   23.06   3
  -9  -6  -6  262.43   30.20   3
   9   6   6  261.26   32.14   2
  10   6   6   19.31   13.29   2
 -10  -6  -6   37.10   12.90   3
  11   6   6 1111.93   91.36   2
 -11  -6  -6 1179.13   90.37   3
  12   6   6   28.40   14.95   2
 -12  -6  -6   37.88   15.08   3
  13   6   6    3.16   13.85   2
 -13  -6  -6   18.07   13.58   3
 -14  -6  -6   44.95   17.10   3
 -15  -6  -6   65.26   19.78   3
  14  -7  -6   48.41   20.38   1
  14  -7  -6   25.58   11.14   4
 -13   7   6  226.09   28.39   1
 -12   7   6  260.81   29.53   1
 -11   7   6    3.33   10.87   1
 -10   7   6  230.52   26.54   1
  -9   7   6   28.25   13.32   2
  -9   7   6   10.06   10.93   1
  -8   7   6 1072.30   68.26   1
  -8   7   6  887.46   74.48   2
  -7   7   6  283.48   27.76   2
  -7   7   6  234.71   24.33   1
  -6   7   6  418.03   35.30   2
  -6   7   6  337.98   30.11   1
   6  -7  -6  376.87   34.96   3
  -5   7   6  935.73   67.98   1
   5  -7  -6 1083.57   77.89   3
  -5   7   6 1073.81   76.67   2
   4  -7  -6    0.27    8.50   3
  -4   7   6    4.24    7.20   1
  -4   7   6   12.88    8.48   2
   3  -7  -6   23.74    8.26   3
   3  -7  -6   15.51    8.53   4
   3  -7  -6   20.89   10.38   1
  -3   7   6   27.39   10.26   2
   2  -7  -6   90.31   12.79   4
  -2   7   6   81.06   14.45   2
   2  -7  -6  103.10   14.54   1
   2  -7  -6   98.78   13.43   3
   1  -7  -6  994.53   67.35   1
   1  -7  -6  990.06   74.32   3
   1  -7  -6 1003.33   60.74   4
  -1   7   6 1084.09   75.65   2
   0  -7  -6    3.49    6.61   3
   0  -7  -6   -0.99    4.53   4
   0  -7  -6    7.32    6.58   1
   0   7   6   -3.33    6.60   2
  -1  -7  -6  454.13   32.90   1
   1   7   6  492.30   39.36   2
  -1  -7  -6  442.84   29.64   4
  -1  -7  -6  439.65   37.21   3
   2   7   6  518.91   42.52   2
  -2  -7  -6  450.37   35.30   1
  -2  -7  -6  545.01   41.61   3
  -3  -7  -6  346.87   28.25   1
  -3  -7  -6  392.98   33.50   3
   3   7   6  402.11   34.95   2
  -4  -7  -6   12.28    8.47   3
   4   7   6   15.70   10.67   2
  -5  -7  -6   54.02   13.31   3
   5   7   6   42.18   13.47   2
  -6  -7  -6 1467.14  104.01   3
   6   7   6 1322.74  102.86   2
  -7  -7  -6  183.27   23.86   3
   7   7   6  191.45   26.79   2
   8   7   6    2.37   11.43   2
  -8  -7  -6  -11.27    7.54   3
   9   7   6  506.42   47.75   2
  -9  -7  -6  509.79   45.74   3
 -10  -7  -6  166.75   24.39   3
  10   7   6  133.84   24.89   2
 -11  -7  -6  228.04   28.65   3
  11   7   6  159.76   27.07   2
  12   7   6   31.83   16.02   2
 -12  -7  -6   16.60   13.48   3
  13   7   6  747.14   67.83   2
 -13  -7  -6  791.58   68.21   3
 -14  -7  -6   46.01   16.96   3
  13  -8  -6   69.27   15.40   4
  13  -8  -6   38.42   18.47   1
  12  -8  -6   35.14   12.33   4
  12  -8  -6   46.59   17.84   1
  11  -8  -6  364.56   32.65   4
  11  -8  -6  371.99   40.74   1
  10  -8  -6  195.78   28.68   1
  10  -8  -6  146.15   23.35   4
  -9   8   6   23.26   15.52   2
   9  -8  -6   37.07   14.24   4
   9  -8  -6   37.22   17.59   1
  -8   8   6  298.43   32.38   2
   8  -8  -6  311.18   30.74   4
   8  -8  -6  321.12   34.89   1
   7  -8  -6    3.70   10.18   4
   7  -8  -6    6.44   12.02   1
  -7   8   6   27.83   13.19   2
   6  -8  -6  601.11   49.32   1
  -6   8   6  633.89   51.39   2
   6  -8  -6  622.57   44.91   4
  -5   8   6    3.33   10.10   2
   5  -8  -6   24.94   12.38   1
   5  -8  -6   12.90   10.62   4
  -4   8   6 1067.93   77.72   2
   4  -8  -6 1007.72   71.80   1
   4  -8  -6 1015.96   65.17   4
   4  -8  -6 1058.47   76.23   3
  -3   8   6 2013.14  144.25   2
   3  -8  -6 2111.60  132.48   1
   3  -8  -6 2063.44  119.04   4
   3  -8  -6 2060.10  145.08   3
   2  -8  -6  215.39   21.56   4
   2  -8  -6  234.98   23.82   1
   2  -8  -6  237.72   22.43   3
  -2   8   6  258.98   24.87   2
   1  -8  -6  429.53   30.41   4
  -1   8   6  450.09   37.42   2
   1  -8  -6  403.63   33.42   1
   1  -8  -6  407.20   34.28   3
   0  -8  -6  119.08   15.16   1
   0  -8  -6   99.62   13.26   4
   0  -8  -6  107.87   15.07   3
   0   8   6  127.63   18.19   2
  -1  -8  -6  723.97   54.22   1
  -1  -8  -6  811.29   60.77   3
   1   8   6  863.83   62.72   2
  -2  -8  -6  314.18   28.08   3
  -2  -8  -6  259.20   24.44   1
   2   8   6  314.76   30.00   2
   3   8   6  531.71   42.97   2
  -3  -8  -6  438.42   35.31   1
  -3  -8  -6  467.81   40.23   3
   4   8   6 2261.56  164.79   2
  -4  -8  -6 2431.95  167.35   3
  -5  -8  -6   86.86   16.50   3
   5   8   6   98.62   19.72   2
   6   8   6  113.85   21.37   2
  -6  -8  -6  124.84   19.55   3
  -7  -8  -6   34.02   12.54   3
   7   8   6   17.34   12.88   2
  -8  -8  -6  275.45   30.41   3
   8   8   6  308.39   33.17   2
   9   8   6  360.90   37.79   2
  -9  -8  -6  326.28   34.27   3
 -10  -8  -6   98.87   19.23   3
  10   8   6  100.93   22.53   2
  11   8   6  519.81   50.84   2
 -11  -8  -6  536.18   48.89   3
 -12  -8  -6    4.68   12.37   3
  12   8   6   29.44   15.78   2
 -13  -8  -6   47.71   18.68   3
 -14  -8  -6   54.07   16.80   3
  12  -9  -6  208.47   26.71   4
  12  -9  -6  203.63   30.93   1
  11  -9  -6   21.64   12.56   4
  11  -9  -6    2.44   14.46   1
  10  -9  -6   77.87   21.64   1
  10  -9  -6   64.13   16.77   4
  -9   9   6   35.73   16.77   2
   9  -9  -6   31.24   12.66   4
   9  -9  -6    7.10   13.16   1
   8  -9  -6  476.80   42.28   1
   8  -9  -6  401.13   36.98   4
  -8   9   6  488.19   43.51   2
   7  -9  -6  102.58   19.20   4
  -7   9   6  100.67   20.53   2
   7  -9  -6  123.05   22.72   1
   6  -9  -6  655.12   50.07   1
   6  -9  -6  553.17   44.11   4
  -6   9   6  616.91   51.88   2
   5  -9  -6  541.01   43.90   1
   5  -9  -6  539.81   39.81   4
  -5   9   6  484.19   44.60   2
   4  -9  -6  268.15   28.92   1
  -4   9   6  222.07   27.16   2
   4  -9  -6  240.47   25.06   4
   3  -9  -6   68.75   14.44   4
  -3   9   6   39.28   13.14   2
   3  -9  -6   35.76   14.32   1
   2  -9  -6   32.19   11.23   4
   2  -9  -6   42.58   13.17   1
  -2   9   6   37.15   13.07   2
   2  -9  -6   48.37    9.49   3
   1  -9  -6  820.89   58.13   1
[truncated: 450,251 more chars]
